# Supplementary material for: Biophysics of object segmentation in a collision-detecting neuron
Source: eLife. 2018 Apr 18;7:e34238. doi: 10.7554/eLife.34238 (PMC5947989; doi:10.7554/eLife.34238)
Supplement: Figure 2—source data 1. — Associated code for generating plots is in the Matlab file Figure2_SourceCode1.m. [file elife-34238-fig2-data1.xlsx]

## Sheet: Fig2B
-0.2	-65.459	-65.439	-64.674	-65.304	-65.103	-68.979	-69.887	-70.671	-70.118	-70.226
-0.199	-65.511	-65.452	-64.736	-65.315	-65.103	-68.94	-69.922	-70.717	-70.042	-70.238
-0.198	-65.546	-65.484	-64.73	-65.319	-65.095	-68.935	-69.92	-70.714	-70.035	-70.27
-0.197	-65.518	-65.469	-64.735	-65.345	-65.068	-68.92	-69.89	-70.698	-70.126	-70.329
-0.196	-65.457	-65.444	-64.722	-65.3	-65.119	-68.949	-69.863	-70.729	-70.117	-70.285
-0.195	-65.455	-65.426	-64.752	-65.291	-65.142	-68.988	-69.895	-70.815	-70.179	-70.206
-0.194	-65.495	-65.478	-64.755	-65.3	-65.121	-68.995	-69.892	-70.807	-70.167	-70.18
-0.193	-65.553	-65.483	-64.727	-65.323	-65.184	-68.968	-69.806	-70.818	-70.099	-70.13
-0.192	-65.594	-65.513	-64.772	-65.35	-65.176	-69.056	-69.764	-70.794	-70.144	-70.054
-0.191	-65.623	-65.497	-64.819	-65.378	-65.161	-69.118	-69.697	-70.754	-70.205	-70.033
-0.19	-65.47	-65.501	-64.772	-65.365	-65.097	-69.191	-69.776	-70.783	-70.244	-70.014
-0.189	-65.507	-65.515	-64.773	-65.381	-65.109	-69.214	-69.805	-70.809	-70.206	-70.052
-0.188	-65.533	-65.501	-64.649	-65.381	-65.117	-69.199	-69.777	-70.898	-70.281	-70.02
-0.187	-65.549	-65.495	-64.578	-65.325	-65.149	-69.139	-69.751	-70.855	-70.347	-69.978
-0.186	-65.574	-65.462	-64.586	-65.318	-65.137	-69.116	-69.763	-70.808	-70.36	-70.009
-0.185	-65.51	-65.469	-64.622	-65.311	-65.156	-69.117	-69.845	-70.717	-70.363	-70.019
-0.184	-65.539	-65.475	-64.616	-65.321	-65.149	-69.134	-69.821	-70.61	-70.369	-69.947
-0.183	-65.568	-65.492	-64.693	-65.286	-65.141	-69.139	-69.729	-70.622	-70.355	-69.844
-0.182	-65.631	-65.451	-64.718	-65.278	-65.164	-69.138	-69.66	-70.639	-70.397	-69.836
-0.181	-65.64	-65.444	-64.729	-65.282	-65.157	-69.145	-69.679	-70.639	-70.428	-69.83
-0.18	-65.599	-65.46	-64.678	-65.221	-65.136	-69.139	-69.741	-70.605	-70.4	-69.852
-0.179	-65.486	-65.487	-64.626	-65.23	-65.144	-69.119	-69.77	-70.57	-70.422	-69.865
-0.178	-65.46	-65.479	-64.605	-65.251	-65.14	-69.096	-69.779	-70.589	-70.42	-69.917
-0.177	-65.444	-65.499	-64.613	-65.23	-65.151	-69.1	-69.819	-70.623	-70.376	-69.942
-0.176	-65.44	-65.492	-64.599	-65.186	-65.183	-69.075	-69.846	-70.64	-70.256	-69.925
-0.175	-65.438	-65.49	-64.628	-65.179	-65.174	-69.064	-69.896	-70.61	-70.258	-69.902
-0.174	-65.48	-65.509	-64.558	-65.189	-65.155	-69.082	-70.003	-70.586	-70.315	-69.896
-0.173	-65.492	-65.51	-64.58	-65.208	-65.204	-69.125	-70.028	-70.609	-70.371	-69.845
-0.172	-65.491	-65.527	-64.6	-65.233	-65.195	-69.156	-70.023	-70.683	-70.418	-69.816
-0.171	-65.539	-65.507	-64.563	-65.23	-65.18	-69.197	-69.977	-70.753	-70.367	-69.811
-0.17	-65.525	-65.529	-64.521	-65.253	-65.186	-69.153	-69.956	-70.701	-70.353	-69.878
-0.169	-65.527	-65.543	-64.599	-65.266	-65.194	-69.175	-69.977	-70.673	-70.347	-69.882
-0.168	-65.531	-65.555	-64.603	-65.294	-65.178	-69.222	-69.945	-70.703	-70.31	-69.875
-0.167	-65.573	-65.588	-64.617	-65.181	-65.15	-69.229	-69.903	-70.728	-70.327	-69.88
-0.166	-65.65	-65.576	-64.625	-65.156	-65.103	-69.221	-69.851	-70.756	-70.397	-69.891
-0.165	-65.675	-65.571	-64.632	-65.188	-65.069	-69.2	-69.888	-70.728	-70.408	-69.947
-0.164	-65.692	-65.579	-64.66	-65.206	-65.065	-69.125	-69.938	-70.685	-70.438	-69.948
-0.163	-65.704	-65.603	-64.696	-65.205	-65.088	-69.033	-69.965	-70.677	-70.437	-69.945
-0.162	-65.701	-65.631	-64.712	-65.169	-65.12	-68.946	-69.949	-70.74	-70.378	-69.934
-0.161	-65.701	-65.635	-64.738	-65.16	-65.129	-68.922	-69.896	-70.799	-70.198	-69.912
-0.16	-65.67	-65.614	-64.753	-65.157	-65.124	-68.892	-69.881	-70.836	-70.081	-69.915
-0.159	-65.673	-65.575	-64.708	-65.149	-65.1	-68.899	-69.899	-70.807	-70.038	-69.954
-0.158	-65.675	-65.567	-64.739	-65.134	-65.131	-68.933	-69.956	-70.825	-69.971	-69.901
-0.157	-65.688	-65.574	-64.796	-65.192	-65.177	-68.977	-69.961	-70.846	-70.009	-69.882
-0.156	-65.678	-65.58	-64.841	-65.203	-65.195	-68.989	-69.95	-70.848	-70.115	-69.897
-0.155	-65.629	-65.597	-64.832	-65.141	-65.181	-68.998	-69.954	-70.805	-69.981	-69.935
-0.154	-65.606	-65.64	-64.832	-65.134	-65.177	-68.936	-69.975	-70.774	-69.861	-69.957
-0.153	-65.623	-65.634	-64.771	-65.145	-65.116	-68.886	-70.022	-70.722	-69.877	-69.978
-0.152	-65.62	-65.653	-64.741	-65.11	-65.099	-68.888	-70.018	-70.711	-69.903	-70.026
-0.151	-65.625	-65.652	-64.745	-65.097	-65.119	-68.958	-70.033	-70.64	-69.832	-70.025
-0.15	-65.685	-65.695	-64.749	-65.067	-65.064	-69.03	-70.086	-70.576	-69.784	-70.022
-0.149	-65.724	-65.711	-64.751	-65.036	-65.104	-69.134	-70.175	-70.495	-69.793	-70.06
-0.148	-65.76	-65.678	-64.758	-65.094	-65.115	-69.197	-70.182	-70.406	-69.811	-70.155
-0.147	-65.743	-65.672	-64.776	-65.122	-65.132	-69.153	-70.158	-70.426	-69.828	-70.128
-0.146	-65.73	-65.655	-64.749	-65.172	-65.179	-69.09	-70.11	-70.435	-69.786	-70.114
-0.145	-65.657	-65.692	-64.698	-65.196	-65.174	-69.061	-69.995	-70.485	-69.734	-70.138
-0.144	-65.606	-65.674	-64.707	-65.236	-65.188	-69.072	-69.88	-70.462	-69.786	-70.209
-0.143	-65.582	-65.705	-64.783	-65.226	-65.21	-69.059	-69.878	-70.448	-69.817	-70.209
-0.142	-65.568	-65.672	-64.646	-65.23	-65.182	-69.082	-69.913	-70.443	-69.787	-70.235
-0.141	-65.591	-65.725	-64.656	-65.236	-65.188	-69.112	-69.908	-70.453	-69.784	-70.209
-0.14	-65.601	-65.695	-64.701	-65.248	-65.206	-69.155	-69.982	-70.445	-69.804	-70.164
-0.139	-65.583	-65.696	-64.727	-65.235	-65.185	-69.118	-70.008	-70.453	-69.811	-70.12
-0.138	-65.547	-65.675	-64.731	-65.222	-65.136	-69.016	-69.961	-70.425	-69.724	-70.091
-0.137	-65.584	-65.621	-64.714	-65.284	-65.118	-68.971	-69.979	-70.45	-69.641	-70.128
-0.136	-65.585	-65.604	-64.676	-65.27	-65.095	-69.064	-69.994	-70.485	-69.598	-70.12
-0.135	-65.579	-65.592	-64.7	-65.257	-65.09	-69.092	-69.974	-70.422	-69.604	-70.079
-0.134	-65.611	-65.571	-64.701	-65.167	-65.061	-69.111	-69.944	-70.303	-69.592	-70.07
-0.133	-65.62	-65.519	-64.619	-65.195	-65.083	-69.156	-69.929	-70.29	-69.583	-70.049
-0.132	-65.584	-65.527	-64.619	-65.235	-65.095	-69.182	-69.928	-70.275	-69.559	-70.059
-0.131	-65.54	-65.56	-64.576	-65.221	-65.063	-69.18	-69.903	-70.29	-69.568	-70.079
-0.13	-65.585	-65.627	-64.548	-65.264	-65.08	-69.172	-69.912	-70.366	-69.635	-70.126
-0.129	-65.602	-65.615	-64.56	-65.283	-65.091	-69.127	-69.927	-70.329	-69.7	-70.163
-0.128	-65.586	-65.642	-64.614	-65.272	-65.104	-69.123	-69.967	-70.378	-69.772	-70.206
-0.127	-65.544	-65.654	-64.614	-65.271	-65.089	-69.143	-69.973	-70.387	-69.781	-70.257
-0.126	-65.565	-65.655	-64.732	-65.317	-65.143	-69.144	-70.016	-70.373	-69.77	-70.242
-0.125	-65.641	-65.671	-64.739	-65.265	-65.128	-69.145	-69.953	-70.306	-69.727	-70.238
-0.124	-65.673	-65.645	-64.751	-65.261	-65.133	-69.197	-69.848	-70.266	-69.803	-70.23
-0.123	-65.692	-65.689	-64.72	-65.257	-65.184	-69.274	-69.79	-70.269	-69.844	-70.199
-0.122	-65.757	-65.671	-64.684	-65.247	-65.208	-69.308	-69.768	-70.326	-69.836	-70.11
-0.121	-65.769	-65.686	-64.657	-65.238	-65.205	-69.339	-69.759	-70.298	-69.831	-70.11
-0.12	-65.731	-65.695	-64.651	-65.244	-65.192	-69.355	-69.766	-70.21	-69.824	-70.112
-0.119	-65.708	-65.727	-64.665	-65.239	-65.174	-69.36	-69.697	-70.203	-69.84	-70.066
-0.118	-65.693	-65.753	-64.732	-65.246	-65.183	-69.364	-69.671	-70.221	-69.921	-69.967
-0.117	-65.664	-65.755	-64.739	-65.232	-65.201	-69.374	-69.669	-70.195	-69.976	-69.875
-0.116	-65.76	-65.749	-64.708	-65.181	-65.194	-69.358	-69.619	-70.28	-70.011	-69.813
-0.115	-65.789	-65.781	-64.643	-65.184	-65.177	-69.34	-69.592	-70.383	-70.091	-69.821
-0.114	-65.653	-65.76	-64.594	-65.229	-65.154	-69.29	-69.61	-70.441	-70.146	-69.899
-0.113	-65.549	-65.756	-64.582	-65.275	-65.183	-69.252	-69.688	-70.466	-70.147	-69.944
-0.112	-65.597	-65.751	-64.628	-65.272	-65.261	-69.268	-69.786	-70.431	-70.103	-69.961
-0.111	-65.571	-65.729	-64.689	-65.197	-65.25	-69.294	-69.816	-70.466	-70.108	-69.949
-0.11	-65.612	-65.733	-64.713	-65.236	-65.2	-69.215	-69.78	-70.405	-70.152	-69.958
-0.109	-65.603	-65.782	-64.722	-65.253	-65.224	-69.247	-69.761	-70.338	-70.234	-69.922
-0.108	-65.608	-65.774	-64.761	-65.247	-65.224	-69.27	-69.744	-70.354	-70.312	-69.963
-0.107	-65.611	-65.692	-64.751	-65.234	-65.235	-69.304	-69.748	-70.457	-70.299	-70.001
-0.106	-65.602	-65.683	-64.739	-65.233	-65.241	-69.319	-69.78	-70.477	-70.313	-69.989
-0.105	-65.655	-65.666	-64.719	-65.21	-65.205	-69.342	-69.833	-70.465	-70.389	-69.873
-0.104	-65.702	-65.658	-64.756	-65.241	-65.212	-69.348	-69.845	-70.487	-70.429	-69.843
-0.103	-65.711	-65.642	-64.773	-65.273	-65.228	-69.354	-69.792	-70.536	-70.462	-69.842
-0.102	-65.687	-65.655	-64.741	-65.266	-65.222	-69.407	-69.822	-70.613	-70.481	-69.882
-0.101	-65.602	-65.659	-64.739	-65.23	-65.207	-69.38	-69.851	-70.66	-70.588	-69.911
-0.1	-65.631	-65.66	-64.769	-65.131	-65.183	-69.34	-69.847	-70.662	-70.686	-69.947
-0.099	-65.638	-65.692	-64.729	-65.084	-65.199	-69.313	-69.886	-70.64	-70.702	-70.001
-0.098	-65.628	-65.733	-64.779	-65.044	-65.193	-69.327	-69.913	-70.632	-70.711	-69.997
-0.097	-65.615	-65.762	-64.793	-65.023	-65.218	-69.334	-69.967	-70.615	-70.693	-69.982
-0.096	-65.634	-65.772	-64.727	-64.997	-65.231	-69.356	-70.091	-70.597	-70.649	-69.986
-0.095	-65.631	-65.776	-64.802	-64.984	-65.226	-69.345	-70.1	-70.558	-70.625	-70.05
-0.094	-65.614	-65.758	-64.766	-64.966	-65.226	-69.287	-70.06	-70.507	-70.628	-70.103
-0.093	-65.618	-65.756	-64.771	-65.003	-65.252	-69.308	-70.029	-70.443	-70.608	-70.163
-0.092	-65.598	-65.732	-64.776	-65.03	-65.27	-69.332	-70.037	-70.398	-70.492	-70.204
-0.091	-65.601	-65.756	-64.756	-65.035	-65.233	-69.261	-70.088	-70.393	-70.431	-70.236
-0.09	-65.561	-65.79	-64.725	-65.075	-65.211	-69.168	-70.037	-70.448	-70.431	-70.263
-0.089	-65.548	-65.714	-64.737	-65.054	-65.257	-69.148	-69.948	-70.44	-70.403	-70.238
-0.088	-65.534	-65.741	-64.742	-65.069	-65.268	-69.145	-69.908	-70.481	-70.354	-70.258
-0.087	-65.519	-65.744	-64.762	-65.08	-65.259	-69.105	-69.957	-70.525	-70.342	-70.225
-0.086	-65.476	-65.71	-64.756	-65.106	-65.202	-69.072	-70.006	-70.556	-70.35	-70.195
-0.085	-65.509	-65.728	-64.764	-65.132	-65.167	-69.097	-70.052	-70.574	-70.343	-70.109
-0.084	-65.515	-65.741	-64.759	-65.157	-65.127	-69.137	-70.057	-70.574	-70.362	-70.062
-0.083	-65.484	-65.704	-64.782	-65.158	-65.111	-69.183	-70.084	-70.515	-70.376	-70.025
-0.082	-65.498	-65.708	-64.806	-65.111	-65.079	-69.205	-70.05	-70.496	-70.303	-70.027
-0.081	-65.47	-65.714	-64.818	-65.157	-65.023	-69.244	-69.958	-70.55	-70.243	-70.053
-0.08	-65.476	-65.712	-64.807	-65.16	-65.064	-69.319	-69.873	-70.583	-70.245	-70.074
-0.079	-65.52	-65.693	-64.804	-65.181	-65.063	-69.367	-69.855	-70.602	-70.291	-70.035
-0.078	-65.464	-65.719	-64.826	-65.189	-65.026	-69.369	-69.852	-70.588	-70.308	-70.042
-0.077	-65.484	-65.739	-64.854	-65.219	-65.022	-69.348	-69.848	-70.551	-70.264	-70.058
-0.076	-65.488	-65.732	-64.821	-65.261	-65.015	-69.303	-69.848	-70.506	-70.297	-70.037
-0.075	-65.474	-65.71	-64.801	-65.272	-65.058	-69.305	-69.814	-70.477	-70.307	-70.059
-0.074	-65.487	-65.703	-64.818	-65.294	-65.069	-69.319	-69.814	-70.413	-70.281	-70.137
-0.073	-65.454	-65.705	-64.724	-65.317	-65.083	-69.317	-69.872	-70.372	-70.289	-70.111
-0.072	-65.462	-65.69	-64.761	-65.339	-65.122	-69.337	-69.859	-70.348	-70.316	-70.178
-0.071	-65.434	-65.656	-64.701	-65.316	-65.129	-69.416	-69.902	-70.369	-70.383	-70.142
-0.07	-65.369	-65.6	-64.74	-65.273	-65.118	-69.412	-69.899	-70.359	-70.352	-70.137
-0.069	-65.35	-65.636	-64.744	-65.281	-65.135	-69.41	-69.862	-70.375	-70.231	-70.081
-0.068	-65.345	-65.579	-64.745	-65.3	-65.143	-69.44	-69.793	-70.314	-70.171	-69.997
-0.067	-65.386	-65.554	-64.725	-65.268	-65.155	-69.415	-69.793	-70.319	-70.181	-70.023
-0.066	-65.456	-65.562	-64.732	-65.298	-65.095	-69.413	-69.852	-70.285	-70.137	-70.003
-0.065	-65.449	-65.565	-64.705	-65.292	-65.069	-69.398	-69.815	-70.242	-70.148	-70.004
-0.064	-65.468	-65.575	-64.718	-65.269	-65.096	-69.316	-69.833	-70.32	-70.222	-70.019
-0.063	-65.473	-65.617	-64.729	-65.226	-65.099	-69.201	-69.932	-70.4	-70.247	-70.087
-0.062	-65.494	-65.635	-64.706	-65.131	-65.079	-69.104	-69.962	-70.455	-70.218	-70.071
-0.061	-65.535	-65.611	-64.704	-65.105	-65.062	-69.113	-69.973	-70.482	-70.214	-70.107
-0.06	-65.554	-65.596	-64.658	-65.103	-65.1	-69.087	-70.02	-70.467	-70.162	-70.114
-0.059	-65.586	-65.598	-64.681	-65.153	-65.107	-69.091	-70.019	-70.393	-70.217	-70.127
-0.058	-65.541	-65.582	-64.676	-65.172	-65.092	-69.131	-70.037	-70.387	-70.173	-70.119
-0.057	-65.54	-65.52	-64.7	-65.193	-65.125	-69.145	-70.028	-70.426	-70.087	-70.134
-0.056	-65.518	-65.547	-64.701	-65.192	-65.129	-69.073	-69.989	-70.488	-70.038	-70.152
-0.055	-65.489	-65.542	-64.721	-65.18	-65.148	-69.043	-70.034	-70.534	-70.029	-70.163
-0.054	-65.56	-65.539	-64.708	-65.157	-65.146	-69.001	-70.055	-70.566	-70.083	-70.148
-0.053	-65.623	-65.528	-64.68	-65.15	-65.195	-68.937	-70.106	-70.573	-70.038	-70.098
-0.052	-65.655	-65.518	-64.683	-65.151	-65.188	-68.929	-70.123	-70.605	-69.97	-70.051
-0.051	-65.619	-65.589	-64.681	-65.111	-65.179	-68.952	-70.094	-70.584	-69.921	-70.064
-0.05	-65.615	-65.623	-64.699	-65.097	-65.199	-68.955	-70.03	-70.559	-69.939	-70.01
-0.049	-65.642	-65.617	-64.697	-65.084	-65.186	-69.003	-70.006	-70.497	-69.981	-69.993
-0.048	-65.667	-65.606	-64.684	-65.091	-65.158	-69.102	-70.05	-70.464	-69.974	-70.006
-0.047	-65.666	-65.584	-64.715	-65.122	-65.158	-69.231	-70.063	-70.447	-70.001	-70.097
-0.046	-65.629	-65.557	-64.722	-65.103	-65.177	-69.229	-69.986	-70.417	-69.962	-70.1
-0.045	-65.602	-65.561	-64.738	-65.142	-65.157	-69.233	-69.958	-70.406	-69.871	-70.028
-0.044	-65.531	-65.548	-64.77	-65.154	-65.115	-69.268	-69.951	-70.439	-69.8	-69.994
-0.043	-65.522	-65.584	-64.796	-65.177	-65.095	-69.335	-69.978	-70.518	-69.749	-69.989
-0.042	-65.519	-65.591	-64.784	-65.225	-65.046	-69.312	-69.97	-70.586	-69.697	-69.996
-0.041	-65.531	-65.617	-64.753	-65.226	-65.075	-69.31	-70.004	-70.596	-69.705	-69.987
-0.04	-65.524	-65.582	-64.744	-65.227	-65.079	-69.341	-70.043	-70.649	-69.685	-69.948
-0.039	-65.528	-65.566	-64.746	-65.171	-65.092	-69.302	-70.035	-70.708	-69.713	-69.869
-0.038	-65.542	-65.567	-64.778	-65.18	-65.087	-69.296	-70.031	-70.681	-69.728	-69.916
-0.037	-65.58	-65.566	-64.762	-65.142	-65.12	-69.339	-69.94	-70.611	-69.702	-69.89
-0.036	-65.551	-65.586	-64.751	-65.151	-65.152	-69.367	-69.98	-70.594	-69.668	-69.802
-0.035	-65.542	-65.596	-64.762	-65.161	-65.175	-69.336	-70.029	-70.532	-69.729	-69.842
-0.034	-65.51	-65.572	-64.798	-65.164	-65.146	-69.203	-70.017	-70.499	-69.654	-69.846
-0.033	-65.58	-65.552	-64.786	-65.153	-65.11	-69.23	-70.072	-70.481	-69.616	-69.801
-0.032	-65.572	-65.565	-64.809	-65.149	-65.137	-69.219	-70.034	-70.461	-69.695	-69.812
-0.031	-65.591	-65.531	-64.796	-65.157	-65.138	-69.181	-69.957	-70.449	-69.684	-69.782
-0.03	-65.609	-65.567	-64.795	-65.153	-65.093	-69.111	-69.884	-70.486	-69.709	-69.704
-0.029	-65.614	-65.578	-64.811	-65.15	-65.095	-69.144	-69.892	-70.458	-69.761	-69.751
-0.028	-65.616	-65.598	-64.797	-65.183	-65.098	-69.191	-69.916	-70.482	-69.845	-69.834
-0.027	-65.571	-65.608	-64.771	-65.182	-65.11	-69.221	-69.887	-70.475	-69.818	-69.882
-0.026	-65.56	-65.609	-64.744	-65.175	-65.162	-69.274	-69.915	-70.404	-69.764	-69.917
-0.025	-65.582	-65.572	-64.764	-65.2	-65.157	-69.336	-69.924	-70.322	-69.754	-69.959
-0.024	-65.566	-65.618	-64.784	-65.182	-65.154	-69.394	-69.938	-70.332	-69.718	-69.928
-0.023	-65.532	-65.618	-64.774	-65.174	-65.095	-69.376	-69.962	-70.341	-69.701	-69.872
-0.022	-65.528	-65.634	-64.758	-65.206	-65.09	-69.411	-70.015	-70.295	-69.696	-69.83
-0.021	-65.513	-65.632	-64.75	-65.209	-65.048	-69.351	-70.02	-70.412	-69.647	-69.76
-0.02	-65.525	-65.618	-64.765	-65.207	-65.054	-69.293	-70.02	-70.432	-69.674	-69.7
-0.019	-65.516	-65.614	-64.759	-65.205	-65.057	-69.248	-70.046	-70.438	-69.704	-69.706
-0.018	-65.525	-65.639	-64.768	-65.2	-65.055	-69.218	-70.077	-70.471	-69.753	-69.761
-0.017	-65.53	-65.62	-64.723	-65.23	-65.034	-69.274	-70.094	-70.422	-69.753	-69.778
-0.016	-65.477	-65.619	-64.729	-65.219	-65.033	-69.314	-70.068	-70.426	-69.691	-69.821
-0.015	-65.521	-65.602	-64.765	-65.223	-64.973	-69.307	-69.915	-70.4	-69.639	-69.86
-0.014	-65.574	-65.605	-64.803	-65.245	-64.96	-69.309	-69.871	-70.378	-69.675	-69.884
-0.013	-65.541	-65.634	-64.838	-65.258	-64.956	-69.357	-69.949	-70.433	-69.703	-69.873
-0.012	-65.507	-65.655	-64.854	-65.253	-64.974	-69.296	-69.938	-70.396	-69.739	-69.915
-0.011	-65.478	-65.67	-64.818	-65.261	-65.014	-69.292	-69.895	-70.306	-69.766	-69.947
-0.01	-65.477	-65.66	-64.832	-65.281	-65.092	-69.29	-69.827	-70.263	-69.801	-69.933
-0.009	-65.464	-65.631	-64.833	-65.266	-65.116	-69.281	-69.798	-70.358	-69.83	-69.946
-0.008	-65.481	-65.65	-64.848	-65.164	-65.089	-69.297	-69.742	-70.438	-69.813	-69.997
-0.007	-65.449	-65.624	-64.851	-65.145	-65.067	-69.386	-69.752	-70.48	-69.804	-70.017
-0.006	-65.499	-65.679	-64.803	-65.149	-65.077	-69.477	-69.764	-70.513	-69.866	-70.05
-0.005	-65.472	-65.688	-64.776	-65.162	-65.102	-69.524	-69.773	-70.534	-69.924	-70.062
-0.004	-65.451	-65.646	-64.74	-65.152	-65.12	-69.526	-69.76	-70.561	-70.026	-70.087
-0.003	-65.484	-65.64	-64.657	-65.14	-65.129	-69.483	-69.73	-70.555	-70.109	-70.14
-0.002	-65.479	-65.625	-64.649	-65.136	-65.084	-69.454	-69.688	-70.598	-70.157	-70.141
-0.001	-65.525	-65.715	-64.663	-65.165	-65.063	-69.471	-71.449	-70.68	-70.243	-70.23
0	-65.714	-75.248	-65.576	-69.796	-65.245	-70.556	-81.812	-82.247	-75.285	-77.207
0.001	-74.343	-79.786	-69.481	-72.863	-67.29	-72.462	-84.21	-86.718	-76.732	-80.016
0.002	-77.611	-83.286	-70.984	-74.965	-68.103	-73.043	-86.292	-89.911	-77.994	-81.685
0.003	-79.827	-86.022	-72.1	-76.762	-68.77	-73.48	-88.06	-92.601	-78.964	-83.151
0.004	-81.98	-88.545	-73.054	-78.163	-69.206	-73.923	-89.735	-94.826	-79.825	-84.305
0.005	-83.811	-90.825	-73.965	-79.381	-69.655	-74.253	-91.213	-96.83	-80.544	-85.505
0.006	-85.472	-92.829	-74.736	-80.471	-70.032	-74.72	-92.595	-98.585	-81.206	-86.553
0.007	-86.817	-94.575	-75.484	-81.517	-70.342	-75.111	-93.59	-100.31	-81.854	-87.38
0.008	-88.025	-96.19	-76.028	-82.471	-70.558	-75.395	-94.696	-101.82	-82.284	-88.23
0.009	-89.383	-97.664	-76.509	-83.186	-70.849	-75.674	-95.627	-103.24	-82.648	-88.872
0.01	-90.428	-99.184	-76.965	-83.918	-71.024	-75.858	-96.356	-104.57	-83.059	-89.553
0.011	-91.522	-100.59	-77.403	-84.591	-71.241	-76.032	-97.192	-105.66	-83.385	-90.196
0.012	-92.396	-101.72	-77.785	-85.122	-71.387	-76.142	-98.016	-106.83	-83.693	-90.73
0.013	-93.223	-102.98	-78.117	-85.79	-71.587	-76.253	-98.707	-107.81	-84.018	-91.374
0.014	-94.254	-104.23	-78.341	-86.455	-71.66	-76.381	-99.343	-108.75	-84.288	-91.924
0.015	-94.914	-105.19	-78.581	-86.859	-71.778	-76.453	-99.946	-109.71	-84.577	-92.253
0.016	-95.462	-106.26	-78.704	-87.344	-71.87	-76.591	-100.65	-110.52	-84.899	-92.662
0.017	-96.395	-107.15	-78.97	-87.847	-71.954	-76.791	-101.26	-111.14	-85.086	-93.085
0.018	-97.05	-108.12	-79.305	-88.188	-72.011	-76.928	-101.8	-111.86	-85.23	-93.45
0.019	-97.727	-108.87	-79.481	-88.558	-72.062	-77.133	-102.36	-112.53	-85.46	-93.813
0.02	-98.252	-109.57	-79.59	-88.955	-72.188	-77.354	-102.89	-113.17	-85.693	-94.213
0.021	-98.567	-110.38	-79.782	-89.271	-72.29	-77.425	-103.27	-113.58	-85.924	-94.527
0.022	-99.387	-111.13	-79.874	-89.579	-72.353	-77.49	-103.66	-114.33	-86.039	-94.913
0.023	-100.06	-111.81	-80.016	-89.811	-72.384	-77.51	-104.26	-114.91	-86.128	-95.137
0.024	-100.49	-112.51	-80.2	-90.085	-72.453	-77.565	-104.7	-115.33	-86.237	-95.383
0.025	-100.97	-113.22	-80.324	-90.35	-72.535	-77.658	-105	-115.79	-86.41	-95.665
0.026	-101.4	-113.87	-80.494	-90.621	-72.559	-77.701	-105.29	-116.31	-86.487	-95.852
0.027	-102.13	-114.48	-80.568	-90.804	-72.583	-77.797	-105.66	-116.81	-86.575	-96.153
0.028	-102.44	-115.06	-80.621	-91.038	-72.631	-77.792	-106.04	-117.43	-86.749	-96.474
0.029	-102.78	-115.63	-80.73	-91.151	-72.673	-77.854	-106.28	-117.85	-86.886	-96.624
0.03	-103.26	-116.3	-80.831	-91.338	-72.665	-77.872	-106.47	-118.25	-87.052	-96.802
0.031	-103.64	-116.97	-80.962	-91.54	-72.633	-77.884	-106.75	-118.62	-87.101	-96.969
0.032	-103.93	-117.44	-81.035	-91.712	-72.628	-77.901	-107	-118.94	-87.223	-97.135
0.033	-104.17	-117.99	-81.152	-91.954	-72.628	-77.94	-107.23	-119.27	-87.409	-97.254
0.034	-104.39	-118.39	-81.193	-92.12	-72.627	-77.942	-107.63	-119.54	-87.568	-97.468
0.035	-104.51	-118.85	-81.256	-92.27	-72.641	-77.926	-107.95	-119.87	-87.618	-97.677
0.036	-104.69	-119.3	-81.298	-92.444	-72.636	-77.952	-108.14	-120.07	-87.545	-97.849
0.037	-105.04	-119.75	-81.352	-92.561	-72.716	-78.052	-108.33	-120.32	-87.575	-97.948
0.038	-105.28	-120.19	-81.438	-92.699	-72.789	-78.119	-108.67	-120.66	-87.613	-98.102
0.039	-105.55	-120.64	-81.513	-92.896	-72.743	-78.107	-108.88	-120.98	-87.701	-98.315
0.04	-105.86	-121.12	-81.519	-93.037	-72.788	-78.059	-109.12	-121.3	-87.661	-98.483
0.041	-105.96	-121.58	-81.541	-93.164	-72.823	-78.041	-109.4	-121.66	-87.614	-98.551
0.042	-106.05	-121.93	-81.575	-93.207	-72.805	-78.07	-109.69	-122.19	-87.735	-98.701
0.043	-106.22	-122.29	-81.485	-93.284	-72.832	-78.09	-109.85	-122.44	-87.88	-98.853
0.044	-106.4	-122.57	-81.547	-93.379	-72.853	-78.122	-110.13	-122.6	-87.93	-99.011
0.045	-106.61	-122.76	-81.576	-93.432	-72.862	-78.142	-110.27	-122.85	-87.949	-99.174
0.046	-106.84	-123.01	-81.546	-93.457	-72.856	-78.252	-110.36	-123.24	-87.793	-99.306
0.047	-107.07	-123.22	-81.478	-93.507	-72.777	-78.339	-110.41	-123.6	-87.781	-99.47
0.048	-107.23	-123.32	-81.474	-93.626	-72.758	-78.374	-110.48	-123.86	-87.774	-99.595
0.049	-107.34	-123.36	-81.492	-93.638	-72.752	-78.335	-110.67	-124.17	-87.869	-99.715
0.05	-107.5	-123.55	-81.529	-93.598	-72.727	-78.336	-110.86	-124.48	-87.922	-99.879
0.051	-107.7	-123.68	-81.591	-93.547	-72.663	-78.356	-111.02	-124.75	-87.994	-100.06
0.052	-107.78	-123.89	-81.613	-93.582	-72.666	-78.362	-111.17	-125	-87.98	-100.14
0.053	-107.88	-124.07	-81.64	-93.633	-72.688	-78.318	-111.26	-125.29	-87.996	-100.22
0.054	-107.98	-124.24	-81.668	-93.693	-72.734	-78.221	-111.36	-125.44	-88.06	-100.28
0.055	-108.08	-124.41	-81.713	-93.752	-72.762	-78.165	-111.46	-125.43	-88.092	-100.22
0.056	-108.18	-124.57	-81.725	-93.838	-72.74	-78.149	-111.61	-125.47	-88.109	-100.24
0.057	-108.26	-124.67	-81.777	-93.911	-72.718	-78.186	-111.75	-125.59	-88.126	-100.32
0.058	-108.38	-124.83	-81.767	-93.964	-72.698	-78.238	-111.96	-125.74	-88.199	-100.33
0.059	-108.46	-124.98	-81.789	-93.983	-72.75	-78.25	-112.18	-125.91	-88.174	-100.32
0.06	-108.51	-125.23	-81.802	-93.996	-72.776	-78.239	-112.38	-126.07	-88.082	-100.32
0.061	-108.67	-125.34	-81.852	-94.033	-72.725	-78.194	-112.53	-126.32	-88.021	-100.41
0.062	-108.82	-125.48	-81.866	-94.068	-72.691	-78.136	-112.66	-126.51	-88.01	-100.44
0.063	-108.9	-125.66	-81.832	-94.09	-72.703	-78.094	-112.79	-126.72	-88.011	-100.38
0.064	-109.01	-125.85	-81.776	-94.131	-72.72	-78.049	-112.87	-126.86	-87.998	-100.35
0.065	-109.11	-126.01	-81.729	-94.177	-72.737	-78.116	-112.93	-126.98	-88.009	-100.42
0.066	-109.2	-126.14	-81.694	-94.172	-72.723	-78.1	-113.02	-127.16	-88.041	-100.43
0.067	-109.37	-126.31	-81.714	-94.203	-72.732	-78.123	-113.14	-127.3	-88.006	-100.39
0.068	-109.52	-126.45	-81.787	-94.225	-72.775	-78.216	-113.19	-127.33	-88.041	-100.37
0.069	-109.6	-126.63	-81.834	-94.245	-72.801	-78.251	-113.12	-127.54	-88.07	-100.43
0.07	-109.71	-126.83	-81.904	-94.33	-72.832	-78.153	-113.02	-127.68	-88.08	-100.46
0.071	-109.8	-126.97	-81.956	-94.384	-72.862	-78.248	-113.16	-127.75	-88.115	-100.48
0.072	-109.91	-127.05	-81.965	-94.413	-72.828	-78.329	-113.29	-127.86	-88.189	-100.54
0.073	-109.99	-127.13	-81.92	-94.452	-72.784	-78.386	-113.35	-128.02	-88.33	-100.57
0.074	-110.03	-127.22	-81.953	-94.497	-72.784	-78.435	-113.41	-128.21	-88.397	-100.63
0.075	-110.06	-127.27	-81.979	-94.531	-72.753	-78.472	-113.45	-128.35	-88.454	-100.7
0.076	-110.11	-127.41	-81.978	-94.565	-72.734	-78.492	-113.59	-128.36	-88.521	-100.71
0.077	-110.09	-127.47	-81.975	-94.528	-72.728	-78.449	-113.73	-128.19	-88.537	-100.66
0.078	-110.16	-127.5	-81.932	-94.499	-72.729	-78.345	-113.84	-128.17	-88.548	-100.65
0.079	-110.23	-127.55	-81.87	-94.481	-72.692	-78.316	-113.92	-128.3	-88.62	-100.76
0.08	-110.33	-127.59	-81.893	-94.424	-72.685	-78.33	-114.04	-128.42	-88.751	-100.87
0.081	-110.33	-127.55	-81.95	-94.393	-72.691	-78.403	-114.15	-128.59	-88.9	-100.97
0.082	-110.33	-127.4	-81.949	-94.409	-72.712	-78.449	-114.28	-128.6	-88.979	-100.92
0.083	-110.32	-127.3	-82.057	-94.439	-72.706	-78.443	-114.41	-128.65	-88.992	-100.88
0.084	-110.41	-127.21	-82.055	-94.477	-72.724	-78.419	-114.44	-128.76	-88.841	-100.87
0.085	-110.42	-127.18	-81.897	-94.536	-72.745	-78.41	-114.43	-128.88	-88.729	-100.9
0.086	-110.37	-127.15	-81.9	-94.603	-72.755	-78.429	-114.47	-129.05	-88.686	-100.95
0.087	-110.34	-127.18	-81.959	-94.667	-72.776	-78.458	-114.6	-129.16	-88.661	-100.98
0.088	-110.3	-127.17	-82.056	-94.643	-72.778	-78.554	-114.74	-129.13	-88.673	-101.09
0.089	-110.26	-127.15	-82.088	-94.722	-72.81	-78.57	-114.79	-129.16	-88.68	-101.11
0.09	-110.29	-127.16	-82.078	-94.794	-72.837	-78.434	-114.84	-129.31	-88.692	-101.2
0.091	-110.29	-127.21	-82.011	-94.813	-72.826	-78.357	-114.94	-129.53	-88.593	-101.23
0.092	-110.31	-127.3	-82.006	-94.821	-72.837	-78.32	-114.94	-129.56	-88.535	-101.3
0.093	-110.23	-127.27	-82.062	-94.821	-72.821	-78.33	-114.88	-129.56	-88.528	-101.36
0.094	-110.25	-127.3	-82.023	-94.809	-72.848	-78.311	-114.89	-129.52	-88.553	-101.38
0.095	-110.25	-127.3	-82.015	-94.806	-72.879	-78.262	-114.92	-129.56	-88.569	-101.37
0.096	-110.26	-127.23	-82.044	-94.839	-72.853	-78.283	-114.81	-129.62	-88.56	-101.39
0.097	-110.19	-127.13	-81.975	-94.884	-72.877	-78.321	-114.56	-129.58	-88.573	-101.38
0.098	-110.16	-127.07	-81.898	-94.918	-72.907	-78.301	-114.33	-129.56	-88.513	-101.39
0.099	-110.18	-127.06	-81.916	-94.974	-72.824	-78.285	-114.22	-129.51	-88.494	-101.39
0.1	-110.29	-127.02	-81.944	-95.036	-72.786	-78.293	-114.2	-129.53	-88.483	-101.42
0.101	-110.38	-126.88	-81.93	-94.976	-72.801	-78.352	-114.16	-129.55	-88.366	-101.48
0.102	-110.27	-126.77	-81.864	-94.921	-72.866	-78.418	-114.09	-129.6	-88.357	-101.55
0.103	-110.17	-126.68	-81.789	-94.869	-72.88	-78.452	-114.11	-129.61	-88.428	-101.54
0.104	-110.26	-126.59	-81.811	-94.867	-72.843	-78.45	-114.19	-129.69	-88.516	-101.54
0.105	-110.34	-126.54	-81.866	-94.852	-72.813	-78.433	-114.17	-129.82	-88.597	-101.57
0.106	-110.36	-126.46	-81.853	-94.849	-72.776	-78.408	-114.13	-130.02	-88.669	-101.56
0.107	-110.36	-126.41	-81.837	-94.845	-72.725	-78.402	-114.09	-130.18	-88.729	-101.48
0.108	-110.31	-126.33	-81.857	-94.83	-72.707	-78.349	-114.12	-130.28	-88.732	-101.43
0.109	-110.26	-126.27	-81.828	-94.743	-72.73	-78.331	-114.16	-130.35	-88.656	-101.42
0.11	-110.29	-126.22	-81.856	-94.682	-72.743	-78.237	-114.21	-130.35	-88.617	-101.42
0.111	-110.3	-126.17	-81.807	-94.652	-72.726	-78.12	-114.23	-130.34	-88.62	-101.43
0.112	-110.22	-126.13	-81.803	-94.651	-72.684	-78.109	-114.39	-130.41	-88.643	-101.48
0.113	-110.16	-125.97	-81.803	-94.625	-72.665	-78.152	-114.42	-130.49	-88.616	-101.5
0.114	-110.06	-125.84	-81.822	-94.653	-72.701	-78.2	-114.47	-130.56	-88.634	-101.53
0.115	-109.91	-125.71	-81.8	-94.645	-72.713	-78.18	-114.5	-130.67	-88.705	-101.53
0.116	-109.89	-125.61	-81.799	-94.617	-72.728	-78.223	-114.46	-130.79	-88.791	-101.56
0.117	-109.83	-125.52	-81.818	-94.573	-72.681	-78.296	-114.57	-130.91	-88.89	-101.61
0.118	-109.76	-125.39	-81.847	-94.597	-72.64	-78.336	-114.66	-130.88	-88.97	-101.61
0.119	-109.69	-125.34	-81.849	-94.485	-72.626	-78.397	-114.7	-130.79	-89.014	-101.63
0.12	-109.58	-125.31	-81.811	-94.386	-72.682	-78.496	-114.76	-130.81	-89.078	-101.71
0.121	-109.54	-125.22	-81.893	-94.335	-72.734	-78.55	-114.81	-130.86	-89.064	-101.75
0.122	-109.57	-125.05	-81.805	-94.271	-72.772	-78.578	-114.89	-130.89	-89.066	-101.77
0.123	-109.62	-124.93	-81.797	-94.201	-72.751	-78.563	-115.05	-130.84	-89.038	-101.8
0.124	-109.59	-124.81	-81.845	-94.238	-72.747	-78.576	-115.11	-130.78	-89.055	-101.82
0.125	-109.54	-124.7	-81.847	-94.316	-72.74	-78.59	-115.14	-130.74	-89.095	-101.79
0.126	-109.49	-124.58	-81.784	-94.343	-72.714	-78.648	-115.24	-130.72	-89.117	-101.8
0.127	-109.53	-124.39	-81.782	-94.396	-72.685	-78.67	-115.31	-130.79	-89.082	-101.69
0.128	-109.57	-124.23	-81.726	-94.462	-72.658	-78.628	-115.35	-130.92	-89.071	-101.56
0.129	-109.59	-124.19	-81.677	-94.499	-72.654	-78.515	-115.37	-131.03	-89.127	-101.43
0.13	-109.53	-124.14	-81.667	-94.543	-72.666	-78.44	-115.4	-131.12	-89.099	-101.34
0.131	-109.49	-124.06	-81.668	-94.601	-72.675	-78.386	-115.36	-131.21	-89.031	-101.32
0.132	-109.46	-124.05	-81.708	-94.589	-72.626	-78.376	-115.37	-131.18	-89.022	-101.38
0.133	-109.5	-124	-81.695	-94.569	-72.566	-78.349	-115.43	-131.1	-89.11	-101.42
0.134	-109.5	-123.94	-81.717	-94.521	-72.594	-78.343	-115.47	-131.12	-89.179	-101.46
0.135	-109.3	-123.86	-81.767	-94.494	-72.609	-78.343	-115.52	-131.22	-89.14	-101.57
0.136	-109.19	-123.8	-81.828	-94.45	-72.606	-78.383	-115.64	-131.26	-89.14	-101.56
0.137	-109.06	-123.66	-81.859	-94.439	-72.54	-78.375	-115.74	-131.3	-89.197	-101.5
0.138	-109.06	-123.61	-81.893	-94.346	-72.582	-78.35	-115.86	-131.37	-89.243	-101.5
0.139	-109.11	-123.53	-81.86	-94.279	-72.628	-78.295	-115.92	-131.35	-89.265	-101.48
0.14	-109.11	-123.39	-81.89	-94.184	-72.658	-78.302	-115.99	-131.22	-89.191	-101.47
0.141	-109.09	-123.22	-81.87	-94.094	-72.642	-78.364	-116.03	-131.19	-89.055	-101.56
0.142	-109.01	-123.07	-81.84	-94.044	-72.585	-78.389	-116.15	-131.17	-88.927	-101.61
0.143	-108.92	-122.91	-81.839	-94.066	-72.574	-78.337	-116.21	-131.1	-88.922	-101.64
0.144	-108.92	-122.72	-81.844	-94.135	-72.674	-78.275	-116.2	-131.06	-88.894	-101.68
0.145	-108.93	-122.5	-81.835	-94.235	-72.676	-78.246	-116.22	-131.06	-88.938	-101.69
0.146	-108.82	-122.26	-81.855	-94.268	-72.655	-78.302	-116.24	-131.15	-89.004	-101.67
0.147	-108.74	-122.06	-81.825	-94.322	-72.652	-78.351	-116.19	-131.3	-89.071	-101.66
0.148	-108.72	-121.91	-81.786	-94.415	-72.638	-78.381	-116.15	-131.4	-89.136	-101.67
0.149	-108.73	-121.76	-81.786	-94.441	-72.699	-78.396	-116.09	-131.45	-89.086	-101.68
0.15	-108.7	-121.61	-81.814	-94.446	-72.74	-78.363	-116.11	-131.35	-89.005	-101.76
0.151	-108.69	-121.42	-81.753	-94.406	-72.701	-78.411	-116.16	-131.24	-89.011	-101.74
0.152	-108.63	-121.2	-81.73	-94.418	-72.661	-78.485	-116.17	-131.3	-89.053	-101.75
0.153	-108.53	-120.98	-81.585	-94.44	-72.691	-78.491	-116.13	-131.51	-89.115	-101.79
0.154	-108.47	-120.88	-81.515	-94.419	-72.73	-78.491	-116.11	-131.65	-89.091	-101.82
0.155	-108.44	-120.73	-81.5	-94.479	-72.736	-78.484	-116.16	-131.81	-89.038	-101.84
0.156	-108.45	-120.56	-81.458	-94.493	-72.801	-78.376	-116.15	-131.86	-89.01	-101.88
0.157	-108.4	-120.4	-81.453	-94.498	-72.886	-78.298	-116.1	-131.88	-88.99	-101.93
0.158	-108.33	-120.28	-81.494	-94.494	-72.897	-78.303	-116.11	-131.92	-89.02	-101.99
0.159	-108.27	-120.2	-81.435	-94.524	-72.923	-78.304	-116.2	-131.98	-89.065	-102.09
0.16	-108.21	-120.03	-81.363	-94.507	-72.966	-78.374	-116.25	-132.01	-89.114	-102.12
0.161	-108.19	-119.88	-81.344	-94.481	-72.959	-78.384	-116.34	-131.96	-89.054	-102.13
0.162	-108.22	-119.73	-81.372	-94.446	-72.938	-78.411	-116.42	-131.88	-89.022	-102.18
0.163	-108.19	-119.64	-81.388	-94.405	-72.922	-78.418	-116.46	-131.86	-89.007	-102.2
0.164	-108.18	-119.54	-81.379	-94.362	-72.92	-78.392	-116.54	-131.95	-88.977	-102.17
0.165	-108.19	-119.45	-81.423	-94.339	-72.912	-78.382	-116.56	-132.01	-88.89	-102.16
0.166	-108.24	-119.3	-81.443	-94.29	-72.897	-78.327	-116.55	-132.02	-88.855	-102.14
0.167	-108.29	-119.1	-81.472	-94.299	-72.872	-78.318	-116.46	-132.07	-88.855	-102.19
0.168	-108.23	-118.92	-81.47	-94.319	-72.845	-78.321	-116.35	-132.12	-88.895	-102.19
0.169	-108.07	-118.78	-81.544	-94.288	-72.8	-78.317	-116.34	-132.16	-88.919	-102.14
0.17	-107.89	-118.65	-81.568	-94.263	-72.773	-78.315	-116.39	-132.17	-88.934	-102.15
0.171	-107.76	-118.54	-81.588	-94.217	-72.76	-78.344	-116.37	-132.24	-88.92	-102.18
0.172	-107.63	-118.3	-81.48	-94.135	-72.736	-78.329	-116.39	-132.33	-88.944	-102.22
0.173	-107.5	-118.04	-81.431	-94.057	-72.739	-78.338	-116.38	-132.38	-89.051	-102.28
0.174	-107.42	-117.9	-81.555	-94.001	-72.747	-78.332	-116.44	-132.44	-89.079	-102.32
0.175	-107.38	-117.56	-81.54	-93.995	-72.772	-78.345	-116.48	-132.59	-89.118	-102.29
0.176	-107.33	-117.33	-81.509	-94.002	-72.77	-78.362	-116.45	-132.64	-89.085	-102.1
0.177	-107.27	-117.09	-81.408	-94.024	-72.78	-78.363	-116.45	-132.48	-89.104	-101.86
0.178	-107.28	-116.93	-81.408	-94.022	-72.771	-78.333	-116.47	-132.37	-89.117	-101.77
0.179	-107.27	-116.79	-81.358	-94.016	-72.731	-78.295	-116.43	-132.34	-89.093	-101.77
0.18	-107.21	-116.58	-81.354	-93.99	-72.733	-78.271	-116.44	-132.4	-89.09	-101.81
0.181	-107.18	-116.47	-81.318	-94.032	-72.75	-78.295	-116.45	-132.46	-89.142	-101.79
0.182	-107.11	-116.36	-81.259	-94.052	-72.756	-78.28	-116.42	-132.5	-89.236	-101.76
0.183	-106.86	-116.28	-81.24	-94.023	-72.689	-78.218	-116.46	-132.49	-89.192	-101.7
0.184	-106.87	-116.13	-81.243	-93.94	-72.612	-78.154	-116.61	-132.49	-89.066	-101.72
0.185	-106.9	-115.9	-81.241	-93.924	-72.604	-78.189	-116.73	-132.5	-89.131	-101.74
0.186	-106.83	-115.81	-81.262	-93.9	-72.589	-78.239	-116.78	-132.39	-89.127	-101.81
0.187	-106.81	-115.77	-81.249	-93.92	-72.56	-78.262	-116.76	-132.4	-89.032	-101.86
0.188	-106.85	-115.7	-81.261	-93.905	-72.591	-78.2	-116.77	-132.49	-88.946	-101.87
0.189	-106.85	-115.57	-81.301	-93.865	-72.603	-78.117	-116.74	-132.52	-88.936	-101.88
0.19	-106.85	-115.48	-81.303	-93.75	-72.599	-78.092	-116.72	-132.55	-89.055	-101.95
0.191	-106.86	-115.44	-81.242	-93.723	-72.63	-78.091	-116.78	-132.6	-89.101	-102.01
0.192	-106.71	-115.41	-81.247	-93.7	-72.609	-78.155	-116.91	-132.8	-89.058	-102.13
0.193	-106.54	-115.31	-81.285	-93.646	-72.652	-78.136	-116.97	-132.91	-88.913	-102.13
0.194	-106.47	-115.13	-81.333	-93.631	-72.653	-78.13	-116.97	-132.9	-88.798	-102.08
0.195	-106.42	-114.99	-81.398	-93.611	-72.605	-78.188	-116.95	-132.8	-88.76	-101.96
0.196	-106.36	-114.97	-81.393	-93.527	-72.593	-78.199	-116.99	-132.7	-88.71	-101.82
0.197	-106.17	-114.95	-81.357	-93.445	-72.611	-78.154	-116.98	-132.69	-88.688	-101.76
0.198	-106.07	-114.92	-81.369	-93.413	-72.57	-78.031	-116.99	-132.74	-88.702	-101.86
0.199	-105.96	-114.88	-81.376	-93.402	-72.626	-77.985	-117.04	-132.81	-88.778	-101.88
0.2	-105.85	-114.81	-81.44	-93.331	-72.615	-77.956	-117.13	-132.72	-88.89	-101.89
0.201	-105.8	-114.71	-81.383	-93.286	-72.573	-77.975	-117.19	-132.74	-88.983	-101.91
0.202	-105.69	-114.66	-81.277	-93.267	-72.573	-77.949	-117.2	-132.72	-88.974	-101.98
0.203	-105.59	-114.58	-81.244	-93.197	-72.568	-77.979	-117.26	-132.7	-88.891	-102.03
0.204	-105.54	-114.53	-81.202	-93.157	-72.588	-78.016	-117.25	-132.65	-88.877	-102.08
0.205	-105.46	-114.5	-81.246	-93.131	-72.623	-77.995	-117.2	-132.59	-88.879	-102.08
0.206	-105.44	-114.43	-81.269	-93.064	-72.598	-78.005	-117.19	-132.55	-88.898	-102.07
0.207	-105.44	-114.24	-81.259	-93.059	-72.611	-78.109	-117.21	-132.54	-88.893	-102.08
0.208	-105.37	-113.97	-81.247	-93.109	-72.608	-78.167	-117.24	-132.56	-88.885	-102.22
0.209	-105.27	-113.86	-81.237	-93.143	-72.609	-78.148	-117.26	-132.65	-88.952	-102.3
0.21	-105.19	-113.74	-81.22	-93.133	-72.626	-78.086	-117.19	-132.62	-89.027	-102.24
0.211	-105.13	-113.61	-81.155	-93.058	-72.635	-78.059	-117.13	-132.55	-89.033	-102.11
0.212	-105.09	-113.45	-81.142	-92.993	-72.591	-78.097	-117.14	-132.45	-89.107	-102.08
0.213	-105.06	-113.35	-81.173	-92.968	-72.573	-78.183	-117.11	-132.25	-89.191	-102.04
0.214	-105.1	-113.25	-81.179	-92.979	-72.57	-78.246	-116.96	-132.12	-89.211	-102.08
0.215	-105.11	-113.18	-81.229	-93.018	-72.591	-78.166	-116.9	-132.19	-89.2	-102.09
0.216	-105.08	-113.09	-81.255	-93.017	-72.57	-78.073	-116.87	-132.28	-89.119	-102.04
0.217	-105.07	-112.98	-81.281	-93.003	-72.608	-78.018	-116.8	-132.29	-88.947	-101.9
0.218	-105.06	-112.93	-81.288	-93.04	-72.61	-77.995	-116.75	-132.39	-88.793	-101.83
0.219	-104.91	-112.82	-81.306	-93.076	-72.613	-77.996	-116.73	-132.48	-88.73	-101.83
0.22	-104.87	-112.65	-81.295	-93.07	-72.592	-78.043	-116.76	-132.48	-88.819	-101.9
0.221	-104.9	-112.6	-81.342	-93.048	-72.608	-78.148	-116.86	-132.51	-88.814	-102.03
0.222	-104.89	-112.56	-81.356	-93.114	-72.617	-78.219	-116.83	-132.56	-88.809	-102.15
0.223	-104.85	-112.49	-81.406	-93.161	-72.605	-78.279	-116.85	-132.56	-88.789	-102.24
0.224	-104.8	-112.43	-81.417	-93.189	-72.62	-78.157	-116.76	-132.56	-88.602	-102.3
0.225	-104.75	-112.32	-81.38	-93.212	-72.617	-78.218	-116.64	-132.62	-88.481	-102.33
0.226	-104.7	-112.2	-81.292	-93.231	-72.615	-78.321	-116.61	-132.75	-88.38	-102.31
0.227	-104.66	-112.08	-81.239	-93.185	-72.634	-78.35	-116.59	-132.96	-88.333	-102.3
0.228	-104.6	-111.97	-81.245	-93.173	-72.611	-78.359	-116.56	-133.11	-88.322	-102.31
0.229	-104.58	-111.87	-81.076	-93.156	-72.566	-78.397	-116.54	-133.16	-88.275	-102.37
0.23	-104.58	-111.81	-80.947	-93.106	-72.604	-78.365	-116.52	-133.26	-88.218	-102.42
0.231	-104.62	-111.69	-80.909	-93.041	-72.584	-78.376	-116.49	-133.29	-88.297	-102.42
0.232	-104.59	-111.6	-80.955	-93.008	-72.561	-78.347	-116.5	-133.29	-88.382	-102.43
0.233	-104.6	-111.55	-80.965	-92.952	-72.534	-78.303	-116.52	-133.25	-88.491	-102.39
0.234	-104.53	-111.48	-80.932	-92.95	-72.51	-78.288	-116.54	-133.15	-88.504	-102.39
0.235	-104.41	-111.27	-80.921	-92.961	-72.501	-78.324	-116.55	-133.07	-88.48	-102.46
0.236	-104.29	-111.14	-80.932	-92.998	-72.504	-78.313	-116.55	-133.04	-88.51	-102.59
0.237	-104.17	-111.1	-80.982	-92.991	-72.474	-78.276	-116.61	-133.09	-88.536	-102.64
0.238	-104.12	-111.02	-80.981	-92.977	-72.443	-78.21	-116.61	-133.08	-88.577	-102.61
0.239	-104.11	-110.94	-80.978	-92.987	-72.487	-78.186	-116.58	-133.08	-88.588	-102.55
0.24	-104.09	-110.89	-80.978	-92.994	-72.554	-78.217	-116.5	-132.99	-88.547	-102.51
0.241	-104	-110.77	-80.975	-93.01	-72.538	-78.214	-116.42	-132.92	-88.592	-102.56
0.242	-103.94	-110.72	-80.969	-92.974	-72.537	-78.135	-116.3	-133.01	-88.652	-102.62
0.243	-103.86	-110.67	-81.065	-92.925	-72.54	-78.117	-116.22	-133.15	-88.648	-102.64
0.244	-103.77	-110.62	-81.066	-92.706	-72.557	-78.088	-116.14	-133.24	-88.634	-102.65
0.245	-103.71	-110.55	-81.047	-92.551	-72.512	-78.068	-116.13	-133.32	-88.623	-102.7
0.246	-103.67	-110.53	-81.039	-92.488	-72.471	-78.047	-116.18	-133.42	-88.587	-102.74
0.247	-103.68	-110.44	-80.998	-92.492	-72.485	-78.144	-116.25	-133.45	-88.543	-102.75
0.248	-103.69	-110.33	-80.993	-92.449	-72.508	-78.173	-116.34	-133.42	-88.542	-102.81
0.249	-103.68	-110.22	-81.015	-92.407	-72.426	-78.16	-116.36	-133.36	-88.646	-102.85
0.25	-103.71	-110.12	-81.042	-92.363	-72.404	-78.119	-116.27	-133.31	-88.64	-102.86
0.251	-103.8	-110.03	-81.039	-92.352	-72.442	-78.063	-116.13	-133.29	-88.525	-102.87
0.252	-103.86	-109.91	-81.035	-92.287	-72.488	-78.103	-116.13	-133.35	-88.478	-102.93
0.253	-103.77	-109.82	-81.054	-92.264	-72.55	-78.201	-116.14	-133.37	-88.496	-102.97
0.254	-103.7	-109.82	-81.045	-92.242	-72.551	-78.204	-116.08	-133.41	-88.53	-103.01
0.255	-103.66	-109.83	-81.117	-92.248	-72.537	-78.197	-116.04	-133.42	-88.576	-103.02
0.256	-103.61	-109.72	-81.148	-92.243	-72.495	-78.226	-116.02	-133.47	-88.605	-103.01
0.257	-103.55	-109.6	-81.112	-92.259	-72.412	-78.275	-115.93	-133.51	-88.674	-102.87
0.258	-103.49	-109.56	-81.132	-92.239	-72.432	-78.332	-115.88	-133.57	-88.748	-102.72
0.259	-103.46	-109.56	-81.182	-92.279	-72.389	-78.426	-115.8	-133.67	-88.796	-102.67
0.26	-103.43	-109.59	-81.181	-92.257	-72.378	-78.428	-115.71	-133.82	-88.842	-102.75
0.261	-103.44	-109.49	-81.192	-92.298	-72.408	-78.424	-115.69	-133.85	-88.875	-102.79
0.262	-103.44	-109.43	-81.148	-92.323	-72.411	-78.41	-115.79	-133.73	-88.896	-102.78
0.263	-103.46	-109.35	-81.042	-92.331	-72.401	-78.43	-115.84	-133.62	-88.934	-102.79
0.264	-103.47	-109.25	-80.976	-92.334	-72.381	-78.438	-115.87	-133.52	-88.909	-102.85
0.265	-103.46	-109.14	-80.972	-92.306	-72.384	-78.384	-115.81	-133.44	-88.926	-102.8
0.266	-103.4	-109.1	-80.988	-92.209	-72.381	-78.304	-115.78	-133.39	-88.971	-102.74
0.267	-103.39	-109	-80.963	-92.184	-72.372	-78.246	-115.78	-133.38	-89.083	-102.77
0.268	-103.42	-108.91	-80.954	-92.142	-72.349	-78.249	-115.82	-133.36	-89.103	-102.78
0.269	-103.46	-108.82	-81.004	-92.133	-72.409	-78.256	-115.8	-133.3	-89.144	-102.77
0.27	-103.42	-108.75	-80.981	-92.146	-72.407	-78.302	-115.69	-133.29	-89.158	-102.74
0.271	-103.27	-108.63	-81.014	-92.153	-72.363	-78.306	-115.7	-133.25	-89.171	-102.8
0.272	-103.26	-108.54	-81.053	-92.167	-72.358	-78.306	-115.8	-133.27	-89.157	-102.83
0.273	-103.31	-108.51	-81.084	-92.166	-72.388	-78.24	-115.89	-133.22	-89.044	-102.88
0.274	-103.21	-108.46	-81.068	-92.132	-72.46	-78.281	-115.9	-133.22	-88.992	-102.91
0.275	-103.15	-108.44	-81.071	-92.121	-72.468	-78.267	-115.86	-133.21	-88.911	-102.95
0.276	-103.09	-108.43	-81.071	-92.137	-72.556	-78.282	-115.9	-133.13	-88.889	-102.93
0.277	-103	-108.46	-81.065	-92.081	-72.604	-78.26	-116.05	-133.04	-88.891	-102.9
0.278	-103.07	-108.47	-81.08	-92.036	-72.576	-78.25	-116.12	-132.89	-88.933	-102.85
0.279	-103.12	-108.45	-81.071	-91.945	-72.549	-78.296	-116.17	-132.83	-88.939	-102.8
0.28	-103.09	-108.39	-81.069	-91.891	-72.581	-78.322	-116.17	-132.72	-88.873	-102.78
0.281	-103.04	-108.35	-81.058	-91.887	-72.596	-78.363	-116.18	-132.68	-88.773	-102.78
0.282	-102.95	-108.32	-80.975	-91.908	-72.595	-78.392	-116.21	-132.62	-88.856	-102.79
0.283	-102.91	-108.28	-80.959	-91.924	-72.584	-78.364	-116.23	-132.53	-88.861	-102.78
0.284	-102.75	-108.2	-80.962	-91.892	-72.55	-78.39	-116.14	-132.41	-88.884	-102.77
0.285	-102.68	-108.19	-81.024	-91.896	-72.511	-78.397	-116.04	-132.35	-88.877	-102.74
0.286	-102.62	-108.17	-81.11	-91.9	-72.457	-78.456	-116	-132.46	-88.895	-102.74
0.287	-102.61	-108.13	-81.08	-91.929	-72.537	-78.494	-116.02	-132.57	-88.848	-102.75
0.288	-102.6	-108.06	-81.083	-91.918	-72.506	-78.5	-116.07	-132.61	-88.753	-102.63
0.289	-102.56	-107.95	-81.084	-91.886	-72.461	-78.434	-116.08	-132.63	-88.659	-102.6
0.29	-102.55	-107.86	-81.133	-91.769	-72.449	-78.318	-116.08	-132.62	-88.666	-102.54
0.291	-102.56	-107.73	-81.13	-91.683	-72.435	-78.262	-116.08	-132.54	-88.669	-102.39
0.292	-102.54	-107.68	-81.126	-91.697	-72.463	-78.221	-116.13	-132.5	-88.753	-102.32
0.293	-102.51	-107.58	-81.098	-91.73	-72.495	-78.242	-116.15	-132.56	-88.828	-102.31
0.294	-102.5	-107.46	-81.051	-91.703	-72.47	-78.235	-116.21	-132.61	-88.823	-102.33
0.295	-102.49	-107.31	-81.048	-91.674	-72.418	-78.277	-116.22	-132.59	-88.837	-102.36
0.296	-102.49	-107.24	-81.127	-91.691	-72.378	-78.334	-116.24	-132.57	-88.915	-102.39
0.297	-102.56	-107.19	-81.157	-91.743	-72.352	-78.389	-116.28	-132.61	-88.878	-102.32
0.298	-102.57	-107.17	-81.169	-91.77	-72.291	-78.417	-116.28	-132.67	-88.94	-102.33
0.299	-102.46	-107.1	-81.109	-91.79	-72.294	-78.439	-116.23	-132.74	-88.997	-102.44
0.3	-102.34	-106.99	-81.124	-91.79	-72.313	-78.466	-116.16	-132.74	-89.038	-102.47
0.301	-102.3	-106.97	-81.249	-91.783	-72.34	-78.497	-116.15	-132.78	-89.052	-102.52
0.302	-102.25	-106.95	-81.199	-91.726	-72.342	-78.521	-116.17	-132.82	-89.027	-102.52
0.303	-102.18	-106.97	-81.096	-91.772	-72.389	-78.424	-116.18	-132.85	-88.931	-102.51
0.304	-102.13	-106.96	-81.083	-91.745	-72.447	-78.348	-116.2	-132.84	-88.849	-102.59
0.305	-102.13	-106.86	-81.062	-91.683	-72.48	-78.259	-116.27	-132.96	-88.764	-102.66
0.306	-102.15	-106.85	-81.014	-91.565	-72.489	-78.213	-116.31	-132.99	-88.705	-102.63
0.307	-102.11	-106.81	-80.987	-91.514	-72.53	-78.255	-116.38	-132.93	-88.749	-102.55
0.308	-102.11	-106.81	-80.96	-91.522	-72.525	-78.295	-116.48	-132.88	-88.757	-102.51
0.309	-102.06	-106.84	-80.939	-91.55	-72.511	-78.338	-116.59	-132.87	-88.737	-102.49
0.31	-102	-106.8	-80.877	-91.553	-72.53	-78.316	-116.61	-132.92	-88.747	-102.5
0.311	-102.06	-106.66	-80.833	-91.513	-72.529	-78.297	-116.62	-133.03	-88.783	-102.55
0.312	-102.13	-106.62	-80.838	-91.46	-72.523	-78.259	-116.64	-133.19	-88.798	-102.67
0.313	-102.16	-106.56	-80.737	-91.411	-72.501	-78.27	-116.7	-133.38	-88.798	-102.77
0.314	-102.16	-106.51	-80.721	-91.42	-72.476	-78.308	-116.68	-133.5	-88.79	-102.77
0.315	-102.14	-106.49	-80.724	-91.426	-72.451	-78.281	-116.62	-133.58	-88.756	-102.73
0.316	-102.09	-106.4	-80.698	-91.396	-72.397	-78.203	-116.6	-133.6	-88.656	-102.71
0.317	-102.07	-106.34	-80.651	-91.344	-72.337	-78.179	-116.63	-133.61	-88.621	-102.73
0.318	-102.07	-106.28	-80.659	-91.322	-72.312	-78.22	-116.69	-133.54	-88.557	-102.64
0.319	-101.94	-106.24	-80.712	-91.319	-72.314	-78.335	-116.73	-133.46	-88.485	-102.58
0.32	-101.83	-106.19	-80.718	-91.337	-72.34	-78.406	-116.73	-133.4	-88.494	-102.55
0.321	-101.74	-106.1	-80.755	-91.37	-72.32	-78.331	-116.72	-133.34	-88.402	-102.62
0.322	-101.71	-106.07	-80.778	-91.418	-72.332	-78.213	-116.75	-133.34	-88.385	-102.57
0.323	-101.69	-105.99	-80.728	-91.416	-72.324	-78.181	-116.88	-133.34	-88.418	-102.48
0.324	-101.68	-105.99	-80.718	-91.44	-72.343	-78.158	-116.98	-133.31	-88.459	-102.33
0.325	-101.58	-105.97	-80.734	-91.446	-72.383	-78.132	-117.17	-133.3	-88.427	-102.34
0.326	-101.51	-105.93	-80.786	-91.498	-72.415	-78.101	-117.3	-133.36	-88.419	-102.27
0.327	-101.5	-105.85	-80.858	-91.561	-72.42	-78.107	-117.37	-133.4	-88.376	-102.18
0.328	-101.52	-105.81	-80.851	-91.662	-72.426	-78.121	-117.46	-133.41	-88.295	-102.2
0.329	-101.53	-105.82	-80.839	-91.683	-72.42	-78.108	-117.46	-133.37	-88.441	-102.25
0.33	-101.49	-105.75	-80.805	-91.691	-72.412	-78.087	-117.44	-133.4	-88.564	-102.29
0.331	-101.44	-105.76	-80.779	-91.742	-72.411	-77.982	-117.41	-133.31	-88.674	-102.3
0.332	-101.48	-105.7	-80.803	-91.738	-72.415	-78.065	-117.46	-133.18	-88.723	-102.3
0.333	-101.46	-105.67	-80.842	-91.765	-72.38	-78.079	-117.51	-133.11	-88.666	-102.21
0.334	-101.56	-105.61	-80.866	-91.725	-72.435	-78.113	-117.47	-133.15	-88.634	-102.13
0.335	-101.57	-105.5	-80.872	-91.689	-72.402	-78.184	-117.36	-133.15	-88.612	-102.13
0.336	-101.56	-105.45	-80.854	-91.668	-72.366	-78.267	-117.25	-133.08	-88.628	-102.1
0.337	-101.44	-105.49	-80.874	-91.683	-72.401	-78.378	-117.18	-133.04	-88.698	-101.96
0.338	-101.34	-105.49	-80.933	-91.708	-72.392	-78.392	-117.13	-132.85	-88.781	-101.91
0.339	-101.22	-105.46	-80.949	-91.638	-72.411	-78.419	-117.12	-132.83	-88.869	-101.8
0.34	-101.21	-105.47	-80.986	-91.654	-72.416	-78.472	-117.1	-132.92	-88.948	-101.73
0.341	-101.16	-105.48	-80.989	-91.643	-72.429	-78.453	-117.07	-133.07	-89.05	-101.79
0.342	-101.17	-105.47	-80.972	-91.681	-72.444	-78.436	-117.1	-133.15	-89.104	-101.83
0.343	-101.14	-105.5	-80.972	-91.695	-72.43	-78.44	-117.13	-133.13	-89.121	-101.8
0.344	-101.12	-105.49	-80.95	-91.664	-72.437	-78.495	-117.08	-133.09	-89.144	-101.81
0.345	-101.07	-105.38	-80.91	-91.638	-72.417	-78.522	-116.98	-132.98	-89.217	-101.89
0.346	-101.13	-105.29	-80.967	-91.606	-72.428	-78.497	-116.98	-132.92	-89.223	-101.87
0.347	-101.13	-105.18	-80.947	-91.603	-72.381	-78.433	-117.12	-132.87	-89.203	-101.89
0.348	-101.11	-105.07	-80.915	-91.633	-72.323	-78.38	-117.2	-132.83	-89.13	-101.92
0.349	-101.07	-105.05	-80.928	-91.651	-72.304	-78.301	-117.28	-132.84	-89.08	-102.01
0.35	-101.02	-105.07	-80.903	-91.609	-72.289	-78.269	-117.39	-132.85	-89.029	-102.11
0.351	-100.98	-105.08	-80.935	-91.608	-72.328	-78.222	-117.51	-132.76	-89.008	-102.18
0.352	-100.94	-105.09	-80.956	-91.624	-72.329	-78.177	-117.51	-132.59	-89.002	-102.28
0.353	-101.05	-105.12	-80.982	-91.665	-72.357	-78.102	-117.49	-132.53	-88.939	-102.39
0.354	-101.02	-105.13	-80.988	-91.663	-72.404	-78.031	-117.44	-132.55	-88.873	-102.45
0.355	-101.03	-105.03	-80.959	-91.612	-72.455	-77.998	-117.48	-132.61	-88.832	-102.47
0.356	-101.16	-105	-80.993	-91.56	-72.461	-77.963	-117.48	-132.7	-88.805	-102.54
0.357	-101.22	-104.96	-80.991	-91.553	-72.459	-77.933	-117.55	-132.77	-88.854	-102.58
0.358	-101.21	-104.94	-80.993	-91.551	-72.466	-77.931	-117.59	-132.8	-88.974	-102.56
0.359	-101.23	-104.95	-81.042	-91.536	-72.48	-77.92	-117.57	-132.81	-89.094	-102.55
0.36	-101.16	-104.99	-81.016	-91.5	-72.489	-77.904	-117.42	-132.89	-89.098	-102.54
0.361	-101.09	-105.03	-81.011	-91.484	-72.487	-77.839	-117.32	-133.05	-89.126	-102.58
0.362	-101.06	-104.97	-81.004	-91.452	-72.42	-77.883	-117.34	-133.18	-89.171	-102.65
0.363	-101.07	-104.86	-80.966	-91.424	-72.411	-77.919	-117.37	-133.21	-89.224	-102.56
0.364	-101.02	-104.77	-80.694	-91.15	-72.451	-77.956	-117.4	-133.25	-89.233	-102.37
0.365	-100.97	-104.73	-80.608	-91.126	-72.509	-77.986	-117.44	-133.3	-89.219	-102.22
0.366	-100.88	-104.69	-80.647	-91.108	-72.471	-77.939	-117.45	-133.29	-89.259	-102.15
0.367	-100.79	-104.66	-80.666	-91.117	-72.409	-77.986	-117.44	-133.3	-89.34	-102.04
0.368	-100.82	-104.66	-80.714	-91.186	-72.41	-78.11	-117.4	-133.43	-89.373	-102
0.369	-100.76	-104.68	-80.703	-91.239	-72.377	-78.156	-117.36	-133.6	-89.424	-102.04
0.37	-100.72	-104.59	-80.648	-91.258	-72.364	-78.21	-117.31	-133.73	-89.458	-102.08
0.371	-100.79	-104.52	-80.603	-91.262	-72.39	-78.212	-117.34	-133.74	-89.424	-102.08
0.372	-100.73	-104.47	-80.531	-91.303	-72.386	-78.198	-117.38	-133.77	-89.457	-102.02
0.373	-100.73	-104.33	-80.489	-91.336	-72.356	-78.181	-117.36	-133.83	-89.457	-102.08
0.374	-100.7	-104.21	-80.515	-91.412	-72.355	-78.244	-117.31	-133.92	-89.431	-102.05
0.375	-100.62	-104.09	-80.548	-91.457	-72.308	-78.345	-117.28	-133.89	-89.377	-101.94
0.376	-100.54	-104.07	-80.568	-91.489	-72.308	-78.381	-117.28	-133.83	-89.383	-101.79
0.377	-100.5	-104.09	-80.581	-91.51	-72.301	-78.404	-117.3	-133.8	-89.397	-101.73
0.378	-100.48	-104.12	-80.614	-91.497	-72.296	-78.409	-117.27	-133.86	-89.359	-101.75
0.379	-100.46	-104.16	-80.626	-91.538	-72.329	-78.415	-117.22	-133.96	-89.179	-101.79
0.38	-100.44	-104.17	-80.675	-91.57	-72.374	-78.451	-117.1	-134.04	-89.134	-101.84
0.381	-100.35	-104.17	-80.692	-91.567	-72.34	-78.522	-116.88	-134.03	-89.217	-101.85
0.382	-100.24	-104.14	-80.735	-91.545	-72.339	-78.555	-116.83	-134.08	-89.205	-101.82
0.383	-100.17	-104.12	-80.704	-91.522	-72.346	-78.557	-116.87	-134.07	-89.144	-101.86
0.384	-100.19	-104.09	-80.711	-91.511	-72.344	-78.614	-116.85	-134.06	-89.093	-101.77
0.385	-100.21	-104.01	-80.714	-91.544	-72.345	-78.687	-116.78	-134.07	-89.107	-101.73
0.386	-100.18	-103.89	-80.762	-91.582	-72.352	-78.762	-116.72	-134.09	-89.07	-101.76
0.387	-100.15	-103.9	-80.762	-91.587	-72.346	-78.766	-116.74	-134.15	-89.062	-101.75
0.388	-100.12	-103.95	-80.733	-91.57	-72.35	-78.8	-116.79	-134.19	-89.077	-101.73
0.389	-100.1	-103.98	-80.64	-91.539	-72.341	-78.861	-116.77	-134.27	-89.156	-101.79
0.39	-100.08	-103.92	-80.564	-91.475	-72.359	-78.943	-116.74	-134.36	-89.21	-101.87
0.391	-100.09	-103.88	-80.54	-91.369	-72.409	-79.024	-116.72	-134.39	-89.235	-101.95
0.392	-100.01	-103.84	-80.527	-91.306	-72.465	-79.077	-116.8	-134.38	-89.201	-101.96
0.393	-99.904	-103.87	-80.485	-91.313	-72.455	-79.066	-116.98	-134.36	-89.176	-102.06
0.394	-99.762	-103.72	-80.459	-91.296	-72.437	-79.065	-117.1	-134.28	-89.14	-102.2
0.395	-99.703	-103.59	-80.463	-91.298	-72.438	-79.071	-117.12	-134.33	-89.074	-102.28
0.396	-99.606	-103.48	-80.389	-91.271	-72.435	-79.062	-117.04	-134.36	-88.972	-102.36
0.397	-99.514	-103.45	-80.327	-91.223	-72.459	-78.973	-117.05	-134.48	-88.924	-102.41
0.398	-99.578	-103.48	-80.26	-91.14	-72.477	-78.979	-117.06	-134.54	-88.809	-102.48
0.399	-99.539	-103.43	-80.288	-91.11	-72.455	-78.984	-116.99	-134.59	-88.78	-102.52
0.4	-99.513	-103.4	-80.353	-91.09	-72.452	-78.965	-116.8	-134.63	-88.847	-102.53
0.401	-99.443	-103.31	-80.356	-91.07	-72.427	-78.929	-116.79	-134.7	-88.947	-102.58
0.402	-99.328	-103.33	-80.334	-90.995	-72.391	-78.945	-116.79	-134.65	-88.905	-102.68
0.403	-99.289	-103.32	-80.312	-90.992	-72.386	-78.941	-116.79	-134.53	-88.871	-102.72
0.404	-99.249	-103.35	-80.336	-91.001	-72.404	-78.799	-116.85	-134.51	-88.932	-102.79
0.405	-99.249	-103.34	-80.344	-91.009	-72.402	-78.682	-116.94	-134.53	-89.033	-102.85
0.406	-99.206	-103.3	-80.265	-91.085	-72.38	-78.618	-117.01	-134.49	-89.06	-102.87
0.407	-99.051	-103.3	-80.271	-91.104	-72.352	-78.615	-117.04	-134.42	-89.06	-102.87
0.408	-99.079	-103.29	-80.297	-91.089	-72.338	-78.581	-117.11	-134.36	-89.063	-102.9
0.409	-99.077	-103.23	-80.298	-91.106	-72.334	-78.578	-117.17	-134.33	-89.125	-102.96
0.41	-99.059	-103.22	-80.268	-91.136	-72.34	-78.549	-117.23	-134.39	-89.11	-102.94
0.411	-99.056	-103.18	-80.253	-91.153	-72.397	-78.549	-117.29	-134.48	-88.877	-102.87
0.412	-99.049	-103.14	-80.178	-91.165	-72.417	-78.57	-117.36	-134.52	-88.711	-102.8
0.413	-99.032	-103.12	-80.183	-91.153	-72.366	-78.579	-117.44	-134.6	-88.69	-102.75
0.414	-98.991	-103.14	-80.189	-91.154	-72.35	-78.619	-117.46	-134.67	-88.671	-102.75
0.415	-99.054	-103.07	-80.262	-91.134	-72.31	-78.631	-117.4	-134.71	-88.724	-102.74
0.416	-99.111	-103.02	-80.327	-91.111	-72.306	-78.633	-117.3	-134.73	-88.77	-102.64
0.417	-99.181	-103.04	-80.351	-91.096	-72.339	-78.618	-117.21	-134.75	-88.789	-102.65
0.418	-99.146	-103.06	-80.357	-91.03	-72.346	-78.597	-117.14	-134.77	-88.811	-102.69
0.419	-99.156	-103.07	-80.347	-90.973	-72.379	-78.581	-117.08	-134.81	-88.863	-102.76
0.42	-99.18	-103.07	-80.322	-90.92	-72.437	-78.552	-117.03	-134.82	-88.845	-102.91
0.421	-99.178	-103.01	-80.333	-90.946	-72.428	-78.558	-116.95	-134.8	-88.814	-102.99
0.422	-99.134	-102.97	-80.359	-90.952	-72.41	-78.582	-116.89	-134.72	-88.804	-102.89
0.423	-99.106	-102.98	-80.328	-90.937	-72.419	-78.545	-116.76	-134.63	-88.833	-102.87
0.424	-99.052	-103.03	-80.289	-90.918	-72.422	-78.511	-116.71	-134.6	-88.765	-102.84
0.425	-99.089	-103.04	-80.263	-90.915	-72.452	-78.483	-116.78	-134.61	-88.709	-102.88
0.426	-99.092	-102.95	-80.288	-90.908	-72.479	-78.518	-116.77	-134.65	-88.683	-102.94
0.427	-99.108	-102.84	-80.302	-90.902	-72.468	-78.583	-116.63	-134.63	-88.663	-103.03
0.428	-99.093	-102.85	-80.36	-90.852	-72.449	-78.605	-116.7	-134.55	-88.724	-103.05
0.429	-99.061	-102.88	-80.307	-90.788	-72.415	-78.551	-116.79	-134.58	-88.813	-103.08
0.43	-99.006	-102.82	-80.329	-90.766	-72.387	-78.439	-116.78	-134.63	-88.861	-103.12
0.431	-99	-102.79	-80.395	-90.793	-72.333	-78.362	-116.63	-134.7	-88.936	-103.06
0.432	-98.933	-102.78	-80.384	-90.779	-72.245	-78.348	-116.57	-134.74	-88.959	-103.03
0.433	-98.852	-102.71	-80.384	-90.773	-72.182	-78.375	-116.52	-134.74	-88.975	-103.02
0.434	-98.763	-102.52	-80.399	-90.731	-72.211	-78.416	-116.6	-134.77	-88.965	-103.04
0.435	-98.632	-102.45	-80.378	-90.689	-72.193	-78.451	-116.7	-134.79	-89.009	-103.04
0.436	-98.526	-102.54	-80.259	-90.682	-72.236	-78.472	-116.79	-134.76	-89.051	-102.95
0.437	-98.522	-102.65	-80.213	-90.682	-72.241	-78.466	-116.81	-134.72	-89.065	-102.94
0.438	-98.493	-102.64	-80.231	-90.678	-72.218	-78.429	-116.78	-134.66	-89.072	-102.97
0.439	-98.472	-102.66	-80.076	-90.662	-72.183	-78.388	-116.8	-134.64	-89.141	-103.03
0.44	-98.483	-102.51	-80.076	-90.62	-72.185	-78.348	-116.86	-134.62	-89.175	-103.04
0.441	-98.487	-102.32	-80.096	-90.572	-72.24	-78.292	-116.95	-134.59	-89.177	-103.05
0.442	-98.449	-102.23	-80.152	-90.595	-72.27	-78.257	-116.94	-134.49	-89.131	-103.04
0.443	-98.435	-102.25	-80.112	-90.641	-72.215	-78.309	-116.98	-134.32	-89.117	-103
0.444	-98.413	-102.3	-79.949	-90.656	-72.189	-78.324	-116.99	-134.28	-89.162	-102.96
0.445	-98.4	-102.32	-79.947	-90.583	-72.205	-78.338	-116.97	-134.27	-89.139	-102.9
0.446	-98.283	-102.32	-79.906	-90.528	-72.255	-78.344	-117	-134.28	-89.12	-102.8
0.447	-98.262	-102.38	-79.938	-90.451	-72.241	-78.364	-117.12	-134.3	-89.06	-102.69
0.448	-98.283	-102.37	-79.95	-90.398	-72.23	-78.414	-117.17	-134.27	-89.02	-102.72
0.449	-98.386	-102.04	-79.939	-90.349	-72.242	-78.408	-117.34	-134.08	-89.043	-102.86
0.45	-98.407	-101.99	-79.949	-90.314	-72.305	-78.376	-117.47	-133.77	-88.998	-102.91
0.451	-98.433	-101.9	-80.038	-90.308	-72.303	-78.293	-117.5	-133.62	-88.935	-102.92
0.452	-98.435	-101.97	-79.994	-90.335	-72.273	-78.238	-117.43	-133.47	-88.889	-102.84
0.453	-98.294	-102.03	-79.861	-90.354	-72.27	-78.213	-117.4	-133.38	-88.915	-102.79
0.454	-98.252	-102.08	-79.865	-90.35	-72.298	-78.122	-117.43	-133.24	-88.866	-102.79
0.455	-98.173	-102.04	-80.018	-90.343	-72.299	-78.188	-117.43	-133.21	-88.835	-102.82
0.456	-98.124	-101.99	-80.081	-90.357	-72.255	-78.291	-117.5	-133.22	-88.894	-102.87
0.457	-98.094	-101.99	-80.115	-90.358	-72.308	-78.369	-117.59	-133.33	-88.885	-102.88
0.458	-98.072	-102.02	-80.147	-90.335	-72.296	-78.432	-117.65	-133.37	-88.852	-102.87
0.459	-98.047	-101.96	-80.114	-90.364	-72.282	-78.471	-117.57	-133.41	-88.787	-102.91
0.46	-98.004	-101.94	-80.079	-90.375	-72.297	-78.497	-117.48	-133.48	-88.77	-102.89
0.461	-97.958	-101.85	-80.086	-90.36	-72.34	-78.495	-117.5	-133.56	-88.713	-102.82
0.462	-97.967	-101.79	-80.038	-90.323	-72.336	-78.465	-117.53	-133.59	-88.807	-102.76
0.463	-97.909	-101.76	-80.042	-90.311	-72.3	-78.441	-117.52	-133.64	-88.878	-102.77
0.464	-97.93	-101.77	-80.043	-90.35	-72.296	-78.464	-117.49	-133.68	-88.932	-102.85
0.465	-98.009	-101.76	-79.999	-90.388	-72.289	-78.424	-117.52	-133.72	-88.963	-102.9
0.466	-98.117	-101.73	-80.05	-90.393	-72.296	-78.494	-117.6	-133.8	-89.01	-102.91
0.467	-98.2	-101.77	-80.113	-90.385	-72.273	-78.474	-117.52	-133.86	-89.012	-102.83
0.468	-98.193	-101.79	-80.079	-90.381	-72.201	-78.481	-117.33	-133.9	-89.042	-102.71
0.469	-98.181	-101.86	-80.011	-90.403	-72.189	-78.446	-117.26	-133.93	-89.082	-102.7
0.47	-98.09	-101.89	-80.008	-90.446	-72.154	-78.422	-117.24	-134	-89.141	-102.7
0.471	-98.011	-101.93	-80.028	-90.471	-72.175	-78.366	-117.24	-134.02	-89.14	-102.64
0.472	-98.036	-101.89	-80.044	-90.471	-72.184	-78.303	-117.28	-134.03	-89.234	-102.59
0.473	-98.049	-101.87	-80.111	-90.448	-72.211	-78.228	-117.33	-134.01	-89.326	-102.55
0.474	-98.031	-101.81	-80.076	-90.422	-72.227	-78.136	-117.36	-133.99	-89.357	-102.44
0.475	-97.94	-101.73	-80.073	-90.375	-72.259	-78.139	-117.41	-134.03	-89.322	-102.45
0.476	-97.797	-101.69	-80.08	-90.399	-72.268	-78.077	-117.42	-134.07	-89.345	-102.47
0.477	-97.807	-101.67	-80.099	-90.387	-72.288	-78.045	-117.52	-134.01	-89.387	-102.54
0.478	-97.891	-101.66	-80.097	-90.402	-72.275	-78.032	-117.55	-133.97	-89.453	-102.54
0.479	-97.874	-101.63	-80.099	-90.336	-72.27	-78.09	-117.53	-133.97	-89.502	-102.54
0.48	-97.843	-101.6	-80.007	-90.234	-72.283	-78.183	-117.58	-134.04	-89.557	-102.47
0.481	-97.857	-101.58	-80.016	-90.191	-72.268	-78.276	-117.61	-134.13	-89.644	-102.44
0.482	-97.898	-101.53	-80.096	-90.159	-72.315	-78.346	-117.58	-134.12	-89.702	-102.42
0.483	-97.876	-101.5	-80.114	-90.148	-72.336	-78.339	-117.55	-134.09	-89.692	-102.41
0.484	-97.818	-101.5	-80.119	-90.146	-72.343	-78.361	-117.54	-134.06	-89.7	-102.4
0.485	-97.829	-101.47	-80.137	-90.185	-72.288	-78.366	-117.56	-134.02	-89.706	-102.37
0.486	-97.83	-101.39	-80.141	-90.19	-72.251	-78.26	-117.46	-133.82	-89.67	-102.34
0.487	-97.831	-101.4	-80.156	-90.225	-72.269	-78.133	-117.41	-133.64	-89.588	-102.32
0.488	-97.807	-101.43	-80.219	-90.199	-72.325	-78.067	-117.35	-133.59	-89.584	-102.35
0.489	-97.753	-101.46	-80.114	-90.205	-72.374	-78.071	-117.27	-133.48	-89.565	-102.32
0.49	-97.764	-101.45	-80.107	-90.159	-72.369	-78.086	-117.25	-133.42	-89.664	-102.29
0.491	-97.739	-101.39	-80.151	-90.158	-72.336	-78.069	-117.32	-133.35	-89.774	-102.28
0.492	-97.64	-101.37	-80.128	-90.132	-72.307	-78.099	-117.39	-133.26	-89.859	-102.38
0.493	-97.58	-101.4	-80.071	-90.144	-72.295	-78.179	-117.45	-133.16	-89.912	-102.51
0.494	-97.581	-101.44	-80.017	-90.163	-72.32	-78.221	-117.51	-133.05	-89.929	-102.57
0.495	-97.596	-101.41	-80.008	-90.157	-72.374	-78.248	-117.42	-133.09	-89.984	-102.62
0.496	-97.665	-101.38	-79.949	-90.221	-72.318	-78.275	-117.34	-133.18	-90.027	-102.6
0.497	-97.678	-101.35	-79.802	-90.266	-72.323	-78.288	-117.33	-133.27	-89.982	-102.57
0.498	-97.616	-101.33	-79.755	-90.299	-72.286	-78.334	-117.32	-133.34	-89.888	-102.61
0.499	-97.519	-101.3	-79.737	-90.196	-72.3	-78.391	-117.26	-133.51	-89.843	-102.71
0.5	-97.414	-101.32	-79.681	-90.16	-72.298	-78.406	-117.24	-133.49	-89.824	-102.76
0.501	-97.286	-101.3	-79.621	-90.151	-72.264	-78.486	-117.25	-133.36	-89.677	-102.71
0.502	-97.25	-101.28	-79.633	-90.167	-72.273	-78.598	-117.28	-133.2	-89.654	-102.65
0.503	-97.178	-101.25	-79.664	-90.179	-72.245	-78.628	-117.3	-133.11	-89.676	-102.55
0.504	-97.116	-101.24	-79.684	-90.19	-72.254	-78.659	-117.26	-133.1	-89.679	-102.56
0.505	-97.212	-101.24	-79.626	-90.129	-72.257	-78.612	-117.19	-133.08	-89.747	-102.55
0.506	-97.239	-101.26	-79.678	-90.118	-72.236	-78.629	-117.15	-133.11	-89.804	-102.61
0.507	-97.277	-101.28	-79.696	-90.106	-72.251	-78.651	-117.21	-133.14	-89.787	-102.7
0.508	-97.321	-101.33	-79.741	-90.084	-72.278	-78.669	-117.32	-133.19	-89.717	-102.77
0.509	-97.273	-101.34	-79.798	-90.08	-72.299	-78.61	-117.41	-133.25	-89.601	-102.78
0.51	-97.269	-101.24	-79.821	-90.085	-72.304	-78.508	-117.47	-133.27	-89.518	-102.75
0.511	-97.197	-101.14	-79.848	-90.052	-72.283	-78.465	-117.54	-133.22	-89.478	-102.82
0.512	-97.109	-101.06	-79.815	-90.032	-72.258	-78.566	-117.52	-133.17	-89.471	-102.92
0.513	-97.052	-101.05	-79.827	-89.967	-72.235	-78.698	-117.55	-133.15	-89.484	-103.06
0.514	-96.962	-101.03	-79.817	-89.983	-72.226	-78.764	-117.5	-133.18	-89.54	-103.16
0.515	-97.013	-100.96	-79.855	-89.978	-72.254	-78.765	-117.37	-133.31	-89.606	-103.21
0.516	-97.026	-100.9	-79.867	-89.972	-72.293	-78.735	-117.33	-133.4	-89.599	-103.24
0.517	-97.035	-100.89	-79.816	-89.798	-72.306	-78.602	-117.35	-133.49	-89.505	-103.23
0.518	-97.057	-100.92	-79.785	-89.806	-72.314	-78.575	-117.39	-133.57	-89.363	-103.24
0.519	-97.021	-100.91	-79.723	-89.809	-72.321	-78.577	-117.45	-133.69	-89.274	-103.27
0.52	-97.007	-100.83	-79.736	-89.791	-72.306	-78.607	-117.56	-133.67	-89.205	-103.29
0.521	-96.99	-100.79	-79.797	-89.779	-72.298	-78.599	-117.66	-133.59	-89.161	-103.34
0.522	-96.912	-100.85	-79.838	-89.76	-72.297	-78.629	-117.71	-133.57	-89.139	-103.37
0.523	-96.842	-100.87	-79.807	-89.734	-72.265	-78.641	-117.76	-133.46	-89.169	-103.38
0.524	-96.713	-100.85	-79.832	-89.763	-72.233	-78.667	-117.77	-133.35	-89.2	-103.32
0.525	-96.751	-100.86	-79.885	-89.801	-72.226	-78.609	-117.69	-133.24	-89.181	-103.26
0.526	-96.833	-100.86	-79.926	-89.837	-72.261	-78.538	-117.57	-133.17	-89.198	-103.15
0.527	-96.872	-100.82	-79.999	-89.86	-72.294	-78.516	-117.47	-133.15	-89.276	-103.1
0.528	-96.856	-100.8	-80.018	-89.904	-72.303	-78.469	-117.53	-133.07	-89.207	-103.04
0.529	-96.853	-100.61	-79.998	-89.902	-72.274	-78.461	-117.67	-133	-89.147	-103
0.53	-96.864	-100.54	-79.934	-89.924	-72.271	-78.38	-117.8	-132.99	-89.146	-102.91
0.531	-96.891	-100.46	-79.922	-89.89	-72.298	-78.3	-117.79	-133.06	-89.204	-102.78
0.532	-96.917	-100.5	-79.926	-89.88	-72.29	-78.312	-117.81	-133.02	-89.311	-102.73
0.533	-96.934	-100.5	-79.921	-89.89	-72.278	-78.424	-117.84	-132.89	-89.364	-102.67
0.534	-96.903	-100.43	-79.911	-89.871	-72.264	-78.49	-117.83	-132.73	-89.384	-102.67
0.535	-96.841	-100.34	-79.945	-89.83	-72.314	-78.544	-117.8	-132.77	-89.387	-102.71
0.536	-96.838	-100.35	-79.971	-89.757	-72.301	-78.637	-117.78	-132.76	-89.399	-102.78
0.537	-96.839	-100.41	-79.958	-89.728	-72.288	-78.705	-117.79	-132.73	-89.416	-102.84
0.538	-96.831	-100.43	-79.969	-89.715	-72.279	-78.697	-117.77	-132.7	-89.348	-102.9
0.539	-96.783	-100.42	-80.035	-89.701	-72.244	-78.656	-117.77	-132.6	-89.32	-102.99
0.54	-96.854	-100.41	-80.038	-89.649	-72.311	-78.668	-117.81	-132.48	-89.318	-103.06
0.541	-96.92	-100.45	-80.053	-89.536	-72.384	-78.738	-117.85	-132.42	-89.346	-103.14
0.542	-96.926	-100.5	-80.096	-89.55	-72.414	-78.818	-117.88	-132.47	-89.366	-103.12
0.543	-96.861	-100.47	-80.132	-89.538	-72.443	-78.862	-117.88	-132.58	-89.352	-103.05
0.544	-96.74	-100.46	-80.151	-89.586	-72.419	-78.876	-117.88	-132.62	-89.367	-103.03
0.545	-96.727	-100.44	-80.156	-89.575	-72.363	-78.895	-117.88	-132.7	-89.409	-103.01
0.546	-96.678	-100.38	-80.152	-89.587	-72.346	-78.934	-117.87	-132.8	-89.414	-102.98
0.547	-96.683	-100.33	-80.144	-89.623	-72.315	-79.026	-117.91	-132.77	-89.424	-102.97
0.548	-96.663	-100.3	-80.076	-89.626	-72.26	-79.084	-117.91	-132.83	-89.41	-102.98
0.549	-96.69	-100.33	-80.003	-89.612	-72.204	-79.129	-117.9	-132.86	-89.435	-102.94
0.55	-96.753	-100.37	-80.013	-89.638	-72.216	-79.1	-117.91	-132.89	-89.469	-102.87
0.551	-96.738	-100.4	-80.056	-89.66	-72.202	-79.062	-117.87	-132.92	-89.439	-102.8
0.552	-96.709	-100.41	-80.143	-89.679	-72.187	-79.08	-117.86	-133.06	-89.449	-102.72
0.553	-96.574	-100.46	-80.073	-89.691	-72.167	-79.068	-117.89	-133.16	-89.499	-102.72
0.554	-96.506	-100.47	-80.06	-89.675	-72.14	-78.942	-117.87	-133.25	-89.482	-102.8
0.555	-96.563	-100.49	-80.045	-89.694	-72.121	-78.854	-117.78	-133.26	-89.455	-102.84
0.556	-96.578	-100.51	-80.091	-89.711	-72.141	-78.82	-117.72	-133.2	-89.355	-102.98
0.557	-96.507	-100.43	-80.118	-89.714	-72.154	-78.872	-117.65	-133.21	-89.218	-103.08
0.558	-96.488	-100.4	-80.039	-89.744	-72.153	-78.914	-117.56	-133.28	-89.106	-103.09
0.559	-96.472	-100.39	-80.004	-89.795	-72.158	-78.908	-117.5	-133.37	-89.123	-103.13
0.56	-96.484	-100.42	-79.998	-89.818	-72.226	-78.849	-117.54	-133.32	-89.139	-103.16
0.561	-96.46	-100.42	-80.054	-89.811	-72.234	-78.818	-117.64	-133.28	-89.21	-103.21
0.562	-96.466	-100.45	-80.052	-89.739	-72.207	-78.791	-117.64	-133.29	-89.191	-103.23
0.563	-96.5	-100.47	-80.062	-89.683	-72.203	-78.793	-117.6	-133.25	-89.165	-103.26
0.564	-96.479	-100.44	-80.056	-89.631	-72.217	-78.774	-117.56	-133.18	-89.176	-103.31
0.565	-96.498	-100.4	-80.015	-89.629	-72.208	-78.768	-117.56	-133.11	-89.179	-103.33
0.566	-96.416	-100.38	-80.003	-89.623	-72.269	-78.676	-117.61	-133.08	-89.166	-103.37
0.567	-96.427	-100.29	-79.974	-89.608	-72.273	-78.615	-117.65	-133.1	-89.091	-103.31
0.568	-96.459	-100.25	-79.684	-89.594	-72.268	-78.595	-117.6	-133.12	-89.083	-103.27
0.569	-96.475	-100.22	-79.63	-89.547	-72.234	-78.627	-117.53	-133.12	-89.036	-103.28
0.57	-96.467	-100.16	-79.719	-89.525	-72.198	-78.678	-117.5	-133.12	-88.999	-103.26
0.571	-96.493	-100.13	-79.866	-89.516	-72.251	-78.701	-117.55	-133.1	-88.869	-103.2
0.572	-96.5	-100.04	-79.806	-89.537	-72.242	-78.688	-117.6	-133.1	-88.739	-103.2
0.573	-96.542	-99.941	-79.689	-89.518	-72.226	-78.68	-117.61	-133.05	-88.682	-103.24
0.574	-96.543	-99.914	-79.702	-89.496	-72.218	-78.639	-117.57	-132.98	-88.626	-103.25
0.575	-96.523	-99.801	-79.707	-89.488	-72.241	-78.532	-117.58	-132.97	-88.63	-103.27
0.576	-96.501	-99.806	-79.748	-89.472	-72.274	-78.513	-117.67	-132.98	-88.679	-103.33
0.577	-96.519	-99.846	-79.787	-89.457	-72.286	-78.46	-117.72	-132.92	-88.703	-103.39
0.578	-96.408	-99.815	-79.726	-89.482	-72.263	-78.359	-117.73	-132.88	-88.624	-103.42
0.579	-96.304	-99.808	-79.663	-89.451	-72.267	-78.333	-117.73	-132.87	-88.618	-103.45
0.58	-96.212	-99.866	-79.674	-89.4	-72.261	-78.335	-117.76	-132.89	-88.613	-103.41
0.581	-96.178	-99.865	-79.682	-89.394	-72.226	-78.371	-117.8	-132.9	-88.636	-103.4
0.582	-96.178	-99.877	-79.686	-89.386	-72.242	-78.416	-117.85	-132.93	-88.685	-103.38
0.583	-96.256	-99.851	-79.726	-89.402	-72.16	-78.349	-117.93	-132.96	-88.723	-103.35
0.584	-96.214	-99.797	-79.714	-89.342	-72.135	-78.267	-117.85	-132.83	-88.762	-103.27
0.585	-96.188	-99.763	-79.689	-89.257	-72.115	-78.163	-117.65	-132.81	-88.767	-103.21
0.586	-96.156	-99.777	-79.635	-89.205	-72.126	-78.122	-117.54	-132.82	-88.73	-103.19
0.587	-96.156	-99.778	-79.684	-89.175	-72.132	-78.167	-117.54	-132.93	-88.732	-103.15
0.588	-96.201	-99.809	-79.702	-89.158	-72.105	-78.207	-117.55	-133.1	-88.733	-103.06
0.589	-96.286	-99.874	-79.8	-89.119	-72.026	-78.275	-117.58	-133.17	-88.751	-103.04
0.59	-96.344	-99.893	-79.735	-89.045	-72.023	-78.304	-117.64	-133.22	-88.742	-103.03
0.591	-96.398	-99.857	-79.728	-89.014	-72.03	-78.309	-117.59	-133.25	-88.815	-103.07
0.592	-96.389	-99.867	-79.781	-89.042	-72.087	-78.338	-117.5	-133.31	-88.867	-103.05
0.593	-96.333	-99.827	-79.802	-89.011	-72.14	-78.392	-117.53	-133.42	-88.928	-103.04
0.594	-96.303	-99.734	-79.812	-88.977	-72.143	-78.505	-117.57	-133.48	-88.928	-103.04
0.595	-96.282	-99.763	-79.797	-88.936	-72.123	-78.5	-117.57	-133.44	-88.911	-103.07
0.596	-96.229	-99.764	-79.778	-88.923	-72.113	-78.405	-117.62	-133.32	-88.884	-103.12
0.597	-96.194	-99.757	-79.708	-88.967	-72.147	-78.383	-117.74	-133.23	-88.903	-103.2
0.598	-96.162	-99.734	-79.707	-89.014	-72.145	-78.439	-117.82	-133.23	-88.959	-103.25
0.599	-96.16	-99.677	-79.589	-89.042	-72.13	-78.442	-117.82	-133.26	-89.055	-103.28
0.6	-96.114	-99.67	-79.49	-89.038	-72.168	-78.424	-117.83	-133.32	-89.147	-103.22
0.601	-96.09	-99.659	-79.462	-89.038	-72.185	-78.412	-117.89	-133.46	-89.237	-103.21
0.602	-96.09	-99.658	-79.428	-89.006	-72.182	-78.458	-117.96	-133.53	-89.375	-103.25
0.603	-96.088	-99.691	-79.424	-89.004	-72.214	-78.476	-117.95	-133.54	-89.326	-103.31
0.604	-96.07	-99.694	-79.415	-88.999	-72.231	-78.45	-117.93	-133.52	-89.295	-103.37
0.605	-96.05	-99.604	-79.449	-88.965	-72.248	-78.405	-117.98	-133.57	-89.285	-103.37
0.606	-96.057	-99.594	-79.421	-88.962	-72.232	-78.468	-118	-133.51	-89.251	-103.35
0.607	-96.105	-99.593	-79.493	-88.998	-72.155	-78.556	-117.96	-133.38	-89.279	-103.15
0.608	-96.146	-99.576	-79.487	-89	-72.207	-78.595	-117.85	-133.36	-89.282	-103.03
0.609	-96.098	-99.581	-79.475	-89.008	-72.211	-78.588	-117.81	-133.36	-89.251	-103.03
0.61	-96.024	-99.551	-79.484	-89.033	-72.237	-78.609	-117.8	-133.39	-89.215	-103.04
0.611	-95.956	-99.519	-79.539	-89.057	-72.201	-78.573	-117.8	-133.4	-89.149	-102.96
0.612	-96.034	-99.482	-79.539	-89.006	-72.176	-78.49	-117.87	-133.4	-89.149	-102.91
0.613	-96.113	-99.444	-79.555	-88.968	-72.162	-78.47	-117.84	-133.32	-89.154	-102.94
0.614	-96.12	-99.452	-79.548	-88.99	-72.193	-78.44	-117.86	-133.34	-89.168	-102.98
0.615	-96.08	-99.422	-79.525	-88.986	-72.215	-78.408	-117.84	-133.34	-89.21	-102.95
0.616	-96.017	-99.39	-79.547	-88.981	-72.227	-78.391	-117.8	-133.36	-89.221	-102.9
0.617	-96.031	-99.376	-79.583	-88.976	-72.202	-78.33	-117.72	-133.29	-89.184	-102.84
0.618	-96.044	-99.394	-79.631	-89.012	-72.186	-78.314	-117.63	-133.21	-89.19	-102.84
0.619	-96.038	-99.424	-79.669	-88.997	-72.184	-78.304	-117.55	-133.1	-89.212	-102.84
0.62	-96.089	-99.355	-79.656	-89.006	-72.224	-78.227	-117.54	-133	-89.238	-102.85
0.621	-96.102	-99.354	-79.726	-89.02	-72.164	-78.175	-117.49	-132.95	-89.236	-102.84
0.622	-95.977	-99.401	-79.719	-88.971	-72.138	-78.171	-117.38	-132.83	-89.212	-102.9
0.623	-95.947	-99.374	-79.772	-88.915	-72.059	-78.174	-117.17	-132.69	-89.192	-102.97
0.624	-96.04	-99.326	-79.8	-88.937	-72.066	-78.199	-116.93	-132.6	-89.216	-102.99
0.625	-96.049	-99.312	-79.827	-88.927	-72.041	-78.151	-116.87	-132.55	-89.242	-103.02
0.626	-95.997	-99.329	-79.862	-88.849	-72.074	-78.174	-116.91	-132.5	-89.273	-103.04
0.627	-95.93	-99.351	-79.866	-88.849	-72.12	-78.1	-116.95	-132.44	-89.363	-103.11
0.628	-95.878	-99.31	-79.843	-88.857	-72.165	-77.982	-116.93	-132.39	-89.36	-103.08
0.629	-95.88	-99.197	-79.813	-88.835	-72.077	-77.947	-116.89	-132.22	-89.331	-103.07
0.63	-95.86	-99.113	-79.674	-88.847	-72.092	-77.998	-116.86	-131.97	-89.406	-102.97
0.631	-95.837	-99.068	-79.574	-88.851	-72.067	-78.034	-116.78	-131.76	-89.503	-102.89
0.632	-95.774	-99.139	-79.583	-88.889	-72.055	-78.053	-116.67	-131.63	-89.588	-102.87
0.633	-95.719	-99.167	-79.615	-88.874	-72.071	-78.046	-116.74	-131.54	-89.529	-102.84
0.634	-95.696	-99.156	-79.635	-88.833	-72.009	-78.143	-116.84	-131.5	-89.475	-102.81
0.635	-95.692	-99.164	-79.629	-88.888	-71.973	-78.214	-116.83	-131.32	-89.418	-102.74
0.636	-95.741	-99.114	-79.643	-88.869	-71.954	-78.114	-116.78	-131.28	-89.336	-102.66
0.637	-95.61	-99.097	-79.671	-88.855	-71.941	-77.99	-116.8	-131.21	-89.297	-102.63
0.638	-95.612	-99.1	-79.641	-88.875	-71.945	-77.945	-116.91	-131.28	-89.284	-102.65
0.639	-95.617	-99.124	-79.572	-88.908	-71.905	-77.934	-116.92	-131.36	-89.323	-102.69
0.64	-95.625	-99.11	-79.602	-88.911	-71.891	-78.017	-116.91	-131.36	-89.36	-102.72
0.641	-95.601	-99.073	-79.633	-88.921	-71.931	-78.08	-116.95	-131.34	-89.403	-102.64
0.642	-95.584	-99.066	-79.694	-88.918	-71.96	-78.161	-116.98	-131.35	-89.472	-102.59
0.643	-95.542	-99.08	-79.589	-88.894	-71.951	-78.208	-116.89	-131.38	-89.506	-102.55
0.644	-95.495	-99.093	-79.556	-88.88	-71.995	-78.214	-116.86	-131.3	-89.544	-102.5
0.645	-95.499	-99.105	-79.588	-88.779	-72.03	-78.082	-116.89	-131.19	-89.539	-102.52
0.646	-95.502	-99.07	-79.559	-88.764	-72.046	-78.027	-116.88	-131.1	-89.584	-102.57
0.647	-95.429	-99.059	-79.61	-88.728	-72.03	-77.956	-116.89	-131.1	-89.61	-102.63
0.648	-95.459	-99.083	-79.57	-88.686	-72.026	-77.918	-116.89	-131.1	-89.619	-102.6
0.649	-95.483	-99.14	-79.571	-88.704	-71.973	-77.918	-116.93	-131.11	-89.667	-102.46
0.65	-95.515	-99.139	-79.562	-88.623	-71.932	-77.92	-116.99	-131.17	-89.652	-102.42
0.651	-95.578	-99.112	-79.593	-88.603	-71.968	-77.894	-117	-131.24	-89.583	-102.44
0.652	-95.646	-99.115	-79.589	-88.566	-72.013	-77.873	-117.05	-131.26	-89.573	-102.42
0.653	-95.669	-99.117	-79.595	-88.548	-71.998	-77.895	-116.99	-131.27	-89.583	-102.51
0.654	-95.682	-99.096	-79.582	-88.545	-71.971	-77.991	-117.01	-131.3	-89.615	-102.64
0.655	-95.635	-99.114	-79.521	-88.545	-71.977	-78.071	-117.09	-131.34	-89.585	-102.66
0.656	-95.6	-99.089	-79.462	-88.501	-71.994	-78.084	-117.08	-131.42	-89.493	-102.67
0.657	-95.564	-99.043	-79.456	-88.516	-71.994	-78.006	-117.1	-131.5	-89.472	-102.69
0.658	-95.534	-99.014	-79.452	-88.534	-72.034	-77.93	-117.1	-131.5	-89.489	-102.75
0.659	-95.497	-98.976	-79.465	-88.534	-72.071	-77.999	-117.07	-131.49	-89.448	-102.73
0.66	-95.44	-99	-79.531	-88.557	-72.113	-78.119	-117.07	-131.43	-89.328	-102.78
0.661	-95.351	-99.016	-79.499	-88.584	-72.144	-78.172	-117.1	-131.38	-89.276	-102.74
0.662	-95.364	-98.992	-79.45	-88.587	-72.154	-78.307	-117.2	-131.35	-89.324	-102.78
0.663	-95.379	-99.075	-79.419	-88.587	-72.142	-78.4	-117.28	-131.32	-89.304	-102.82
0.664	-95.412	-99.107	-79.379	-88.585	-72.143	-78.433	-117.35	-131.29	-89.338	-102.85
0.665	-95.402	-99.089	-79.386	-88.598	-72.087	-78.45	-117.42	-131.37	-89.317	-102.9
0.666	-95.336	-99.015	-79.394	-88.56	-72.082	-78.509	-117.41	-131.46	-89.399	-102.94
0.667	-95.322	-98.99	-79.415	-88.554	-72.08	-78.601	-117.4	-131.46	-89.408	-102.97
0.668	-95.387	-98.981	-79.485	-88.51	-72.088	-78.675	-117.41	-131.56	-89.411	-103.01
0.669	-95.333	-98.995	-79.48	-88.457	-72.066	-78.733	-117.37	-131.67	-89.362	-103
0.67	-95.285	-98.968	-79.48	-88.41	-71.977	-78.811	-117.43	-131.71	-89.205	-103.05
0.671	-95.293	-98.981	-79.443	-88.327	-71.974	-78.855	-117.42	-131.7	-89.139	-103.03
0.672	-95.285	-99.018	-79.394	-88.258	-71.994	-78.858	-117.4	-131.75	-89.014	-103.04
0.673	-95.088	-99.019	-79.354	-88.215	-71.976	-78.836	-117.35	-131.76	-89.023	-103.02
0.674	-95.03	-99.013	-79.382	-88.184	-71.925	-78.829	-117.31	-131.74	-89.058	-103.06
0.675	-95.045	-99.057	-79.372	-88.125	-71.953	-78.726	-117.29	-131.74	-89.049	-103.1
0.676	-95.098	-99.075	-79.438	-88.124	-71.969	-78.692	-117.3	-131.75	-88.989	-103.04
0.677	-95.17	-99.092	-79.481	-88.139	-71.959	-78.636	-117.32	-131.76	-88.971	-103
0.678	-95.223	-99.073	-79.461	-88.145	-71.971	-78.618	-117.3	-131.77	-88.922	-102.98
0.679	-95.237	-99.032	-79.433	-88.101	-71.99	-78.594	-117.29	-131.88	-88.753	-102.99
0.68	-95.13	-98.965	-79.485	-88.073	-71.999	-78.612	-117.29	-132.05	-88.685	-102.96
0.681	-94.898	-98.905	-79.437	-88.087	-71.996	-78.637	-117.38	-132.06	-88.682	-102.91
0.682	-94.861	-98.901	-79.464	-88.083	-71.952	-78.604	-117.39	-132.09	-88.661	-102.91
0.683	-94.968	-98.878	-79.458	-88.093	-71.903	-78.573	-117.42	-132.17	-88.718	-102.92
0.684	-95.031	-98.899	-79.427	-88.134	-71.889	-78.601	-117.45	-132.23	-88.711	-102.84
0.685	-94.981	-98.935	-79.455	-88.215	-71.925	-78.609	-117.5	-132.2	-88.776	-102.71
0.686	-95.005	-98.919	-79.455	-88.238	-71.959	-78.605	-117.48	-132.17	-88.856	-102.49
0.687	-95.02	-98.902	-79.487	-88.264	-71.932	-78.61	-117.47	-132.13	-88.898	-102.45
0.688	-95.048	-98.816	-79.499	-88.355	-71.914	-78.605	-117.47	-132.11	-88.842	-102.46
0.689	-95.061	-98.772	-79.468	-88.364	-71.917	-78.6	-117.4	-132.07	-88.843	-102.57
0.69	-95.125	-98.786	-79.419	-88.382	-71.936	-78.51	-117.3	-132.03	-88.871	-102.59
0.691	-95.217	-98.746	-79.421	-88.43	-71.951	-78.454	-117.2	-131.98	-88.889	-102.6
0.692	-95.176	-98.739	-79.341	-88.492	-71.95	-78.312	-117.07	-131.97	-88.933	-102.6
0.693	-95.165	-98.731	-79.356	-88.49	-71.932	-78.309	-117.08	-131.92	-89.049	-102.63
0.694	-95.221	-98.72	-79.365	-88.444	-71.922	-78.332	-117.09	-131.87	-89.147	-102.69
0.695	-95.298	-98.72	-79.343	-88.405	-71.914	-78.353	-117.09	-131.76	-89.271	-102.77
0.696	-95.289	-98.7	-79.383	-88.423	-71.909	-78.454	-117.02	-131.75	-89.343	-102.81
0.697	-95.175	-98.701	-79.364	-88.452	-71.913	-78.538	-117	-131.79	-89.364	-102.75
0.698	-95.098	-98.712	-79.341	-88.464	-71.923	-78.578	-117.01	-131.84	-89.391	-102.65
0.699	-95.053	-98.714	-79.295	-88.433	-71.93	-78.544	-117.03	-131.93	-89.421	-102.53
0.7	-95.063	-98.713	-79.368	-88.398	-71.924	-78.566	-117.01	-132	-89.441	-102.56
0.701	-95.039	-98.688	-79.398	-88.4	-71.929	-78.604	-117.06	-132.08	-89.494	-102.56
0.702	-95.004	-98.695	-79.37	-88.407	-71.959	-78.64	-117.16	-132.13	-89.56	-102.59
0.703	-94.942	-98.743	-79.429	-88.363	-71.918	-78.567	-117.14	-132.18	-89.629	-102.61
0.704	-94.926	-98.75	-79.517	-88.448	-71.919	-78.461	-117.08	-132.17	-89.72	-102.62
0.705	-94.924	-98.751	-79.538	-88.41	-71.933	-78.485	-117.06	-132.18	-89.746	-102.68
0.706	-94.926	-98.79	-79.602	-88.402	-71.935	-78.561	-117.07	-132.21	-89.723	-102.69
0.707	-94.926	-98.749	-79.665	-88.42	-71.894	-78.646	-117.14	-132.2	-89.671	-102.69
0.708	-94.934	-98.625	-79.664	-88.4	-71.894	-78.583	-117.14	-132.14	-89.611	-102.64
0.709	-94.967	-98.554	-79.619	-88.352	-71.855	-78.542	-117.16	-132.15	-89.623	-102.63
0.71	-94.979	-98.573	-79.577	-88.271	-71.831	-78.481	-117.17	-132.3	-89.594	-102.59
0.711	-95.021	-98.576	-79.496	-88.276	-71.839	-78.461	-117.15	-132.36	-89.664	-102.56
0.712	-95.06	-98.572	-79.461	-88.298	-71.876	-78.486	-117.05	-132.42	-89.708	-102.53
0.713	-95.084	-98.54	-79.426	-88.297	-71.89	-78.526	-116.99	-132.47	-89.669	-102.57
0.714	-95.092	-98.541	-79.318	-88.297	-71.846	-78.547	-116.99	-132.56	-89.634	-102.58
0.715	-95.085	-98.592	-79.292	-88.279	-71.822	-78.552	-116.95	-132.58	-89.615	-102.6
0.716	-95.157	-98.536	-79.306	-88.219	-71.793	-78.621	-116.95	-132.66	-89.671	-102.61
0.717	-95.236	-98.485	-79.299	-88.256	-71.773	-78.619	-117.02	-132.72	-89.696	-102.54
0.718	-95.272	-98.442	-79.316	-88.26	-71.785	-78.639	-117.04	-132.76	-89.762	-102.56
0.719	-95.271	-98.446	-79.288	-88.24	-71.784	-78.669	-117.06	-132.78	-89.82	-102.59
0.72	-95.266	-98.466	-79.224	-88.22	-71.813	-78.693	-117.08	-132.83	-89.831	-102.62
0.721	-95.242	-98.524	-79.18	-88.198	-71.79	-78.641	-117.13	-132.84	-89.787	-102.6
0.722	-95.246	-98.529	-79.169	-88.205	-71.787	-78.574	-117.21	-132.8	-89.813	-102.54
0.723	-95.209	-98.522	-79.246	-88.204	-71.794	-78.501	-117.27	-132.79	-89.738	-102.47
0.724	-95.24	-98.457	-79.265	-88.193	-71.778	-78.581	-117.32	-132.8	-89.692	-102.51
0.725	-95.233	-98.415	-79.263	-88.145	-71.819	-78.637	-117.33	-132.85	-89.63	-102.61
0.726	-95.196	-98.411	-79.269	-88.111	-71.796	-78.66	-117.3	-132.93	-89.617	-102.65
0.727	-95.036	-98.423	-79.244	-88.12	-71.828	-78.639	-117.4	-132.93	-89.583	-102.66
0.728	-95.014	-98.429	-79.264	-88.075	-71.874	-78.64	-117.48	-132.94	-89.542	-102.66
0.729	-95.023	-98.338	-79.266	-88.045	-71.877	-78.657	-117.48	-132.95	-89.487	-102.65
0.73	-95.033	-98.212	-79.197	-88.025	-71.838	-78.704	-117.47	-132.88	-89.463	-102.69
0.731	-95.037	-98.24	-79.169	-88.045	-71.787	-78.732	-117.45	-132.87	-89.421	-102.72
0.732	-95.041	-98.246	-79.237	-88.048	-71.809	-78.662	-117.46	-132.88	-89.402	-102.77
0.733	-94.979	-98.226	-79.193	-88.078	-71.86	-78.654	-117.46	-132.9	-89.39	-102.81
0.734	-94.964	-98.2	-79.214	-88.092	-71.895	-78.63	-117.44	-132.89	-89.366	-102.8
0.735	-94.923	-98.189	-79.241	-88.106	-71.923	-78.586	-117.42	-132.85	-89.352	-102.8
0.736	-94.883	-98.112	-79.235	-88.069	-71.891	-78.527	-117.51	-132.82	-89.299	-102.79
0.737	-94.841	-98.085	-79.255	-88.084	-71.897	-78.535	-117.68	-132.77	-89.28	-102.76
0.738	-94.857	-98.035	-79.282	-88.07	-71.922	-78.443	-117.75	-132.79	-89.26	-102.69
0.739	-94.883	-98.058	-79.36	-88.059	-71.977	-78.309	-117.79	-132.91	-89.28	-102.66
0.74	-94.834	-98.071	-79.387	-87.997	-71.987	-78.243	-117.79	-132.99	-89.282	-102.56
0.741	-94.84	-98.036	-79.378	-87.956	-71.986	-78.184	-117.87	-132.98	-89.341	-102.45
0.742	-94.911	-98.012	-79.393	-87.922	-72.022	-78.13	-118.02	-132.92	-89.413	-102.42
0.743	-94.855	-98.019	-79.377	-87.96	-72.038	-78.144	-118.01	-132.87	-89.381	-102.42
0.744	-94.824	-98.026	-79.401	-87.962	-72.05	-78.146	-118.04	-132.86	-89.327	-102.45
0.745	-94.786	-98.016	-79.359	-87.93	-72.059	-78.11	-118.07	-132.84	-89.353	-102.45
0.746	-94.841	-98.005	-79.36	-87.879	-71.946	-78.151	-118.08	-132.85	-89.359	-102.44
0.747	-94.779	-97.977	-79.24	-87.92	-71.945	-78.143	-118.06	-132.85	-89.357	-102.43
0.748	-94.708	-98.028	-79.086	-87.959	-71.913	-78.211	-118.03	-132.86	-89.302	-102.43
0.749	-94.695	-98.042	-79.031	-88.017	-71.908	-78.248	-118.05	-132.86	-89.239	-102.44
0.75	-94.697	-98.061	-79.093	-88.062	-71.93	-78.166	-118.08	-132.81	-89.194	-102.48
0.751	-94.734	-98.058	-79.176	-88.021	-71.94	-78.066	-118.09	-132.75	-89.215	-102.39
0.752	-94.741	-98.063	-79.159	-87.879	-71.946	-78.019	-118.08	-132.66	-89.24	-102.36
0.753	-94.549	-98.022	-79.041	-87.84	-71.945	-77.97	-118.05	-132.62	-89.313	-102.41
0.754	-94.434	-98.047	-78.974	-87.813	-71.906	-77.972	-117.98	-132.65	-89.289	-102.45
0.755	-94.435	-98.033	-79.01	-87.799	-71.91	-78.027	-117.9	-132.64	-89.209	-102.54
0.756	-94.446	-98.012	-79.015	-87.849	-71.871	-78.104	-117.75	-132.61	-89.197	-102.54
0.757	-94.52	-98.027	-79.076	-87.858	-71.879	-78.135	-117.64	-132.58	-89.255	-102.53
0.758	-94.615	-98.049	-79.132	-87.862	-71.896	-78.116	-117.58	-132.49	-89.259	-102.5
0.759	-94.677	-98	-79.155	-87.898	-71.905	-78.104	-117.56	-132.37	-89.218	-102.53
0.76	-94.63	-97.925	-79.155	-87.922	-71.916	-78.093	-117.46	-132.35	-89.15	-102.55
0.761	-94.624	-97.881	-78.984	-87.938	-71.932	-78.102	-117.37	-132.32	-89.147	-102.54
0.762	-94.575	-97.877	-78.971	-87.916	-71.9	-78.106	-117.36	-132.3	-89.121	-102.54
0.763	-94.52	-97.829	-78.966	-87.902	-71.833	-78.152	-117.34	-132.29	-89.087	-102.52
0.764	-94.499	-97.787	-79.026	-87.9	-71.854	-78.221	-117.28	-132.33	-89.129	-102.53
0.765	-94.499	-97.838	-78.959	-87.966	-71.82	-78.28	-117.3	-132.44	-89.187	-102.55
0.766	-94.506	-97.899	-78.966	-87.976	-71.811	-78.275	-117.29	-132.42	-89.223	-102.55
0.767	-94.407	-97.938	-79.014	-87.96	-71.821	-78.259	-117.31	-132.29	-89.292	-102.53
0.768	-94.381	-97.999	-79.021	-87.911	-71.825	-78.262	-117.33	-132.22	-89.346	-102.54
0.769	-94.419	-98	-79.099	-87.902	-71.807	-78.296	-117.35	-132.25	-89.443	-102.55
0.77	-94.389	-98.002	-79.087	-87.937	-71.78	-78.345	-117.35	-132.27	-89.526	-102.48
0.771	-94.372	-97.994	-79.086	-87.956	-71.809	-78.345	-117.27	-132.3	-89.56	-102.44
0.772	-94.375	-98.018	-79.114	-87.904	-71.876	-78.342	-117.26	-132.23	-89.61	-102.47
0.773	-94.427	-98.012	-79.166	-87.871	-71.863	-78.262	-117.24	-132.19	-89.646	-102.54
0.774	-94.43	-98.003	-79.2	-87.9	-71.826	-78.3	-117.29	-132.2	-89.646	-102.65
0.775	-94.402	-98.043	-79.248	-87.911	-71.836	-78.332	-117.38	-132.23	-89.579	-102.69
0.776	-94.332	-98.072	-79.258	-87.914	-71.873	-78.386	-117.42	-132.27	-89.532	-102.7
0.777	-94.31	-98.067	-79.232	-87.934	-71.846	-78.369	-117.47	-132.27	-89.535	-102.71
0.778	-94.275	-98.089	-79.215	-87.947	-71.822	-78.351	-117.52	-132.22	-89.621	-102.66
0.779	-94.301	-98.102	-79.185	-87.971	-71.785	-78.377	-117.61	-132.23	-89.707	-102.69
0.78	-94.309	-98.119	-79.162	-87.934	-71.779	-78.496	-117.66	-132.25	-89.741	-102.79
0.781	-94.257	-98.128	-79.096	-87.864	-71.816	-78.48	-117.6	-132.32	-89.687	-102.84
0.782	-94.097	-98.1	-79.072	-87.833	-71.855	-78.391	-117.63	-132.37	-89.664	-102.75
0.783	-94.089	-98.061	-79.096	-87.817	-71.846	-78.356	-117.72	-132.33	-89.591	-102.68
0.784	-94.081	-98.032	-79.052	-87.698	-71.805	-78.434	-117.76	-132.38	-89.473	-102.65
0.785	-94.058	-97.992	-79.033	-87.62	-71.735	-78.527	-117.82	-132.41	-89.409	-102.69
0.786	-94.076	-97.927	-79.041	-87.56	-71.733	-78.579	-117.82	-132.42	-89.331	-102.6
0.787	-94.159	-97.841	-79.095	-87.551	-71.819	-78.6	-117.78	-132.48	-89.239	-102.61
0.788	-94.111	-97.791	-79.096	-87.485	-71.861	-78.625	-117.73	-132.46	-89.186	-102.7
0.789	-94.099	-97.754	-79.079	-87.478	-71.895	-78.549	-117.73	-132.41	-89.166	-102.74
0.79	-94.087	-97.735	-79.124	-87.443	-71.903	-78.544	-117.79	-132.34	-89.188	-102.76
0.791	-94.08	-97.779	-79.142	-87.43	-71.917	-78.589	-117.69	-132.34	-89.19	-102.68
0.792	-93.973	-97.807	-79.145	-87.385	-71.93	-78.655	-117.49	-132.44	-89.148	-102.64
0.793	-93.844	-97.801	-79.144	-87.382	-71.88	-78.674	-117.46	-132.51	-89.195	-102.68
0.794	-93.875	-97.784	-79.106	-87.382	-71.86	-78.599	-117.51	-132.54	-89.293	-102.75
0.795	-93.855	-97.786	-79.138	-87.336	-71.867	-78.548	-117.59	-132.43	-89.414	-102.76
0.796	-93.854	-97.823	-79.147	-87.343	-71.894	-78.522	-117.66	-132.4	-89.452	-102.81
0.797	-93.845	-97.789	-79.126	-87.344	-71.876	-78.544	-117.71	-132.4	-89.474	-102.88
0.798	-93.714	-97.802	-79.119	-87.389	-71.839	-78.496	-117.66	-132.4	-89.4	-102.91
0.799	-93.676	-97.818	-79.144	-87.407	-71.857	-78.446	-117.62	-132.3	-89.363	-102.93
0.8	-93.705	-97.83	-79.134	-87.434	-71.891	-78.438	-117.62	-132.08	-89.333	-102.95
0.801	-93.813	-97.841	-79.137	-87.451	-71.874	-78.421	-117.68	-131.99	-89.336	-102.98
0.802	-93.818	-97.837	-79.206	-87.52	-71.877	-78.428	-117.69	-131.97	-89.337	-102.97
0.803	-93.841	-97.821	-79.233	-87.543	-71.867	-78.469	-117.74	-131.92	-89.284	-102.97
0.804	-93.85	-97.838	-79.199	-87.553	-71.816	-78.528	-117.75	-131.89	-89.245	-103.04
0.805	-93.836	-97.852	-79.176	-87.595	-71.839	-78.527	-117.75	-131.94	-89.165	-103.12
0.806	-93.843	-97.89	-79.182	-87.627	-71.834	-78.524	-117.8	-132	-89.157	-103.16
0.807	-93.867	-97.968	-79.186	-87.58	-71.824	-78.495	-117.9	-132.05	-89.23	-103.24
0.808	-93.733	-97.991	-79.182	-87.472	-71.843	-78.477	-117.9	-132.06	-89.27	-103.29
0.809	-93.718	-97.966	-79.142	-87.442	-71.88	-78.46	-117.93	-132.1	-89.274	-103.29
0.81	-93.716	-97.988	-79.13	-87.446	-71.898	-78.501	-118.03	-132.1	-89.081	-103.29
0.811	-93.729	-97.94	-79.036	-87.481	-71.902	-78.478	-118.11	-132.02	-88.972	-103.33
0.812	-93.782	-97.862	-78.991	-87.529	-71.866	-78.434	-118.18	-132	-88.953	-103.26
0.813	-93.784	-97.818	-78.995	-87.57	-71.858	-78.444	-118.19	-131.92	-88.962	-103.15
0.814	-93.84	-97.772	-79.024	-87.545	-71.859	-78.498	-118.13	-131.77	-89.037	-103.09
0.815	-93.824	-97.731	-79.046	-87.514	-71.837	-78.549	-118.08	-131.81	-89.088	-103.07
0.816	-93.811	-97.635	-79.113	-87.521	-71.805	-78.565	-118.12	-131.76	-89.072	-103.11
0.817	-93.717	-97.619	-79.23	-87.565	-71.771	-78.586	-118.17	-131.67	-89.084	-103.13
0.818	-93.727	-97.605	-79.2	-87.59	-71.783	-78.582	-118.21	-131.41	-89.098	-103.12
0.819	-93.754	-97.613	-79.267	-87.636	-71.796	-78.621	-118.17	-131.18	-89.013	-103.08
0.82	-93.699	-97.647	-79.22	-87.609	-71.777	-78.581	-118.16	-131.06	-88.983	-103.05
0.821	-93.632	-97.65	-79.203	-87.618	-71.793	-78.504	-118.07	-131.02	-88.904	-103.04
0.822	-93.585	-97.66	-79.201	-87.647	-71.799	-78.46	-118.05	-130.88	-88.899	-102.98
0.823	-93.51	-97.663	-79.21	-87.656	-71.788	-78.408	-118.05	-130.85	-88.903	-102.95
0.824	-93.435	-97.682	-79.252	-87.634	-71.78	-78.359	-118.03	-130.83	-88.952	-102.96
0.825	-93.417	-97.711	-79.246	-87.62	-71.841	-78.359	-117.93	-130.86	-89.015	-103
0.826	-93.374	-97.765	-79.227	-87.668	-71.847	-78.404	-117.87	-130.9	-89.038	-103.02
0.827	-93.397	-97.743	-79.147	-87.691	-71.848	-78.38	-117.93	-130.95	-89.123	-103.02
0.828	-93.447	-97.675	-79.128	-87.676	-71.856	-78.405	-118.01	-130.95	-89.215	-103.03
0.829	-93.452	-97.647	-79.108	-87.646	-71.848	-78.36	-118	-130.95	-89.282	-103.05
0.83	-93.451	-97.633	-79.121	-87.661	-71.833	-78.36	-117.84	-130.9	-89.358	-103.03
0.831	-93.442	-97.622	-79.132	-87.663	-71.818	-78.327	-117.79	-130.87	-89.414	-103.03
0.832	-93.39	-97.63	-79.155	-87.683	-71.834	-78.261	-117.83	-130.85	-89.38	-103.08
0.833	-93.398	-97.655	-79.102	-87.712	-71.852	-78.22	-117.83	-130.78	-89.346	-103.12
0.834	-93.467	-97.61	-78.995	-87.693	-71.811	-78.206	-117.88	-130.81	-89.385	-103.16
0.835	-93.534	-97.611	-78.992	-87.652	-71.76	-78.17	-117.88	-130.83	-89.475	-103.16
0.836	-93.56	-97.611	-79.021	-87.647	-71.755	-78.14	-117.75	-130.83	-89.502	-103.05
0.837	-93.532	-97.598	-79.038	-87.681	-71.766	-78.146	-117.64	-130.8	-89.53	-103
0.838	-93.564	-97.572	-79.02	-87.647	-71.783	-78.142	-117.46	-130.83	-89.544	-102.94
0.839	-93.65	-97.523	-78.954	-87.628	-71.85	-78.146	-117.45	-130.89	-89.522	-102.94
0.84	-93.748	-97.479	-78.87	-87.597	-71.888	-78.138	-117.48	-130.85	-89.535	-102.9
0.841	-93.766	-97.481	-78.849	-87.585	-71.871	-78.16	-117.53	-130.75	-89.575	-102.85
0.842	-93.717	-97.49	-78.874	-87.59	-71.856	-78.217	-117.48	-130.7	-89.538	-102.93
0.843	-93.701	-97.513	-78.927	-87.55	-71.891	-78.245	-117.47	-130.71	-89.439	-103.05
0.844	-93.657	-97.511	-78.944	-87.494	-71.889	-78.228	-117.47	-130.75	-89.392	-103.11
0.845	-93.598	-97.523	-78.997	-87.401	-71.874	-78.203	-117.49	-130.72	-89.428	-103.02
0.846	-93.591	-97.514	-79.02	-87.371	-71.838	-78.175	-117.6	-130.69	-89.485	-102.98
0.847	-93.594	-97.481	-79.065	-87.377	-71.802	-78.097	-117.69	-130.7	-89.481	-102.95
0.848	-93.543	-97.454	-79.084	-87.373	-71.71	-78.042	-117.73	-130.77	-89.474	-103.01
0.849	-93.529	-97.405	-79.111	-87.327	-71.733	-78.02	-117.75	-130.72	-89.46	-103.07
0.85	-93.472	-97.413	-79.122	-87.334	-71.751	-77.995	-117.73	-130.68	-89.459	-103.11
0.851	-93.42	-97.354	-79.124	-87.363	-71.764	-77.979	-117.73	-130.59	-89.531	-103.1
0.852	-93.397	-97.338	-79.104	-87.377	-71.741	-78.018	-117.68	-130.53	-89.606	-103.06
0.853	-93.321	-97.363	-79.116	-87.391	-71.785	-78.035	-117.62	-130.52	-89.656	-103.05
0.854	-93.26	-97.392	-79.107	-87.414	-71.884	-78.033	-117.55	-130.45	-89.673	-102.97
0.855	-93.252	-97.325	-79.154	-87.409	-71.89	-77.948	-117.55	-130.37	-89.607	-102.93
0.856	-93.227	-97.266	-79.23	-87.438	-71.902	-77.943	-117.5	-130.38	-89.563	-102.9
0.857	-93.16	-97.168	-79.159	-87.471	-71.875	-77.955	-117.43	-130.35	-89.472	-102.89
0.858	-93.182	-97.036	-79.057	-87.482	-71.81	-78.05	-117.35	-130.45	-89.353	-102.85
0.859	-93.165	-97.012	-78.973	-87.498	-71.803	-78.141	-117.36	-130.52	-89.309	-102.79
0.86	-93.176	-96.988	-78.919	-87.474	-71.771	-78.187	-117.4	-130.5	-89.351	-102.79
0.861	-93.24	-97.048	-78.862	-87.461	-71.777	-78.245	-117.48	-130.45	-89.421	-102.88
0.862	-93.254	-97.099	-78.872	-87.48	-71.856	-78.271	-117.5	-130.39	-89.459	-103.03
0.863	-93.251	-97.122	-78.872	-87.44	-71.864	-78.307	-117.5	-130.33	-89.44	-103.03
0.864	-93.245	-97.173	-78.855	-87.145	-71.87	-78.271	-117.53	-130.36	-89.501	-103.06
0.865	-93.264	-97.17	-78.869	-87.065	-71.877	-78.266	-117.54	-130.38	-89.506	-103.17
0.866	-93.315	-97.167	-78.9	-87.088	-71.856	-78.215	-117.56	-130.39	-89.444	-103.22
0.867	-93.344	-97.114	-78.939	-87.106	-71.833	-78.172	-117.6	-130.34	-89.369	-103.2
0.868	-93.37	-97.026	-78.972	-87.121	-71.783	-78.164	-117.58	-130.32	-89.329	-103.2
0.869	-93.281	-97.025	-78.984	-87.161	-71.737	-78.187	-117.59	-130.3	-89.355	-103.21
0.87	-93.28	-97.115	-78.918	-87.164	-71.725	-78.271	-117.67	-130.27	-89.404	-103.28
0.871	-93.208	-97.112	-78.825	-87.124	-71.74	-78.316	-117.69	-130.16	-89.413	-103.28
0.872	-93.122	-97.106	-78.712	-87.129	-71.738	-78.208	-117.7	-130.1	-89.461	-103.3
0.873	-93.164	-97.076	-78.681	-87.138	-71.719	-78.183	-117.72	-130.1	-89.487	-103.31
0.874	-93.237	-97.034	-78.644	-87.174	-71.723	-78.218	-117.69	-130.16	-89.549	-103.27
0.875	-93.233	-97.02	-78.703	-87.203	-71.72	-78.255	-117.66	-130.12	-89.54	-103.2
0.876	-93.219	-97.041	-78.706	-87.199	-71.706	-78.22	-117.61	-129.93	-89.493	-103.2
0.877	-93.223	-97.001	-78.778	-87.21	-71.709	-78.121	-117.65	-129.83	-89.419	-103.19
0.878	-93.17	-96.988	-78.79	-87.197	-71.701	-78.087	-117.72	-129.9	-89.469	-103.21
0.879	-93.118	-97.004	-78.791	-87.223	-71.675	-78.075	-117.7	-129.94	-89.59	-103.24
0.88	-93.064	-96.934	-78.811	-87.152	-71.676	-78.081	-117.66	-129.94	-89.591	-103.23
0.881	-92.993	-96.958	-78.811	-87.188	-71.708	-78.154	-117.64	-130.01	-89.541	-103.19
0.882	-92.908	-96.968	-78.806	-87.19	-71.665	-78.133	-117.61	-130.04	-89.568	-103.21
0.883	-92.92	-96.922	-78.76	-87.201	-71.651	-78.143	-117.57	-130.01	-89.576	-103.21
0.884	-92.893	-96.877	-78.727	-87.194	-71.644	-78.121	-117.56	-130.02	-89.567	-103.13
0.885	-92.866	-96.888	-78.725	-87.214	-71.63	-78.12	-117.58	-129.95	-89.66	-103.02
0.886	-92.821	-96.921	-78.741	-86.963	-71.631	-78.167	-117.53	-129.88	-89.784	-102.95
0.887	-92.784	-96.902	-78.854	-86.892	-71.616	-78.191	-117.53	-129.87	-89.827	-102.96
0.888	-92.772	-96.917	-78.891	-86.926	-71.634	-78.207	-117.55	-129.88	-89.78	-102.99
0.889	-92.803	-96.904	-78.86	-86.986	-71.649	-78.276	-117.54	-129.8	-89.675	-102.96
0.89	-92.874	-96.911	-78.858	-86.988	-71.702	-78.354	-117.43	-129.8	-89.589	-102.91
0.891	-92.916	-96.93	-78.873	-86.981	-71.721	-78.35	-117.44	-129.81	-89.464	-102.91
0.892	-92.953	-96.862	-78.88	-87.015	-71.669	-78.269	-117.53	-130.02	-89.435	-102.87
0.893	-92.969	-96.816	-78.868	-87.098	-71.658	-78.169	-117.62	-130.06	-89.423	-102.9
0.894	-93.01	-96.746	-78.866	-87.133	-71.675	-78.111	-117.63	-129.96	-89.47	-102.89
0.895	-93.101	-96.77	-78.848	-87.023	-71.665	-78.076	-117.61	-129.84	-89.532	-102.86
0.896	-93.068	-96.767	-78.78	-87.048	-71.642	-78.022	-117.64	-129.82	-89.551	-102.88
0.897	-93.012	-96.713	-78.742	-87.062	-71.66	-77.981	-117.74	-129.82	-89.567	-102.94
0.898	-92.987	-96.67	-78.749	-87.089	-71.664	-77.942	-117.82	-129.93	-89.535	-102.98
0.899	-92.987	-96.679	-78.735	-87.061	-71.682	-77.913	-117.81	-130	-89.514	-102.95
0.9	-92.921	-96.684	-78.72	-87.036	-71.623	-77.89	-117.83	-130.05	-89.541	-102.96
0.901	-92.882	-96.697	-78.725	-87.025	-71.619	-77.925	-117.89	-130.08	-89.554	-102.89
0.902	-92.903	-96.698	-78.721	-87.027	-71.637	-77.944	-117.95	-130.1	-89.512	-102.87
0.903	-92.904	-96.769	-78.76	-87.02	-71.648	-77.977	-118.02	-130.11	-89.424	-102.91
0.904	-92.93	-96.843	-78.759	-86.971	-71.663	-77.946	-118.1	-130.01	-89.296	-102.97
0.905	-92.975	-96.849	-78.78	-87.005	-71.67	-77.875	-118.05	-129.96	-89.277	-102.94
0.906	-93.006	-96.854	-78.816	-87.017	-71.688	-77.836	-117.97	-129.89	-89.241	-102.86
0.907	-92.995	-96.871	-78.866	-87.065	-71.705	-77.85	-117.92	-129.85	-89.245	-102.78
0.908	-92.969	-96.912	-78.907	-87.113	-71.758	-77.879	-117.86	-129.85	-89.245	-102.82
0.909	-92.864	-96.905	-78.868	-87.107	-71.744	-77.933	-117.79	-129.92	-89.237	-102.86
0.91	-92.819	-96.942	-78.867	-87.095	-71.763	-77.98	-117.79	-129.99	-89.184	-102.92
0.911	-92.832	-96.913	-78.887	-87.117	-71.767	-77.996	-117.82	-130	-89.134	-103.04
0.912	-92.884	-96.912	-78.839	-87.118	-71.73	-78.047	-117.85	-129.99	-89.158	-103.16
0.913	-92.849	-96.909	-78.881	-87.115	-71.73	-78.204	-117.92	-129.99	-89.139	-103.2
0.914	-92.749	-96.898	-78.858	-87.097	-71.757	-78.262	-117.97	-129.91	-89.095	-103.23
0.915	-92.697	-96.88	-78.835	-87.062	-71.742	-78.312	-117.99	-129.91	-89.102	-103.27
0.916	-92.683	-96.832	-78.735	-87.01	-71.741	-78.4	-117.99	-129.97	-89.027	-103.29
0.917	-92.698	-96.802	-78.683	-86.998	-71.779	-78.468	-117.99	-129.99	-88.974	-103.28
0.918	-92.727	-96.792	-78.659	-86.997	-71.767	-78.472	-117.96	-129.97	-88.947	-103.23
0.919	-92.748	-96.795	-78.684	-86.954	-71.723	-78.469	-117.93	-129.95	-88.929	-103.19
0.92	-92.779	-96.831	-78.617	-86.934	-71.764	-78.45	-117.89	-129.98	-88.959	-103.12
0.921	-92.783	-96.821	-78.667	-86.904	-71.806	-78.388	-117.86	-129.98	-88.947	-103.08
0.922	-92.77	-96.808	-78.606	-86.876	-71.791	-78.387	-117.79	-129.97	-88.885	-102.98
0.923	-92.718	-96.79	-78.674	-86.889	-71.793	-78.384	-117.78	-129.95	-88.876	-102.91
0.924	-92.698	-96.761	-78.654	-86.862	-71.817	-78.431	-117.77	-129.92	-88.9	-102.88
0.925	-92.699	-96.772	-78.628	-86.854	-71.801	-78.458	-117.75	-129.8	-88.914	-102.83
0.926	-92.72	-96.723	-78.617	-86.873	-71.814	-78.516	-117.73	-129.75	-88.923	-102.83
0.927	-92.781	-96.686	-78.672	-86.891	-71.848	-78.516	-117.77	-129.77	-88.875	-102.86
0.928	-92.781	-96.674	-78.626	-86.884	-71.811	-78.54	-117.77	-129.77	-88.772	-102.87
0.929	-92.79	-96.661	-78.668	-86.847	-71.71	-78.558	-117.75	-129.81	-88.795	-102.92
0.93	-92.864	-96.665	-78.728	-86.839	-71.712	-78.63	-117.72	-129.87	-88.835	-102.97
0.931	-92.866	-96.645	-78.751	-86.892	-71.736	-78.706	-117.72	-129.92	-88.744	-102.96
0.932	-92.814	-96.652	-78.72	-86.905	-71.78	-78.673	-117.77	-129.92	-88.652	-102.99
0.933	-92.854	-96.615	-78.667	-86.911	-71.776	-78.68	-117.82	-129.86	-88.659	-103.09
0.934	-92.932	-96.601	-78.64	-86.859	-71.686	-78.746	-117.9	-129.76	-88.692	-103.12
0.935	-92.985	-96.607	-78.624	-86.836	-71.657	-78.765	-117.98	-129.75	-88.766	-103.11
0.936	-92.974	-96.676	-78.564	-86.842	-71.676	-78.762	-117.99	-129.73	-88.806	-103.16
0.937	-92.844	-96.753	-78.486	-86.853	-71.722	-78.749	-117.95	-129.69	-88.789	-103.16
0.938	-92.815	-96.796	-78.516	-86.901	-71.758	-78.764	-117.96	-129.66	-88.728	-103.18
0.939	-92.747	-96.804	-78.558	-86.941	-71.735	-78.769	-118.01	-129.79	-88.758	-103.04
0.94	-92.721	-96.81	-78.562	-86.923	-71.74	-78.779	-117.93	-129.81	-88.771	-102.94
0.941	-92.658	-96.803	-78.551	-86.94	-71.771	-78.763	-117.86	-129.86	-88.902	-102.93
0.942	-92.691	-96.746	-78.503	-86.981	-71.757	-78.745	-117.89	-129.92	-88.989	-102.96
0.943	-92.727	-96.706	-78.496	-86.979	-71.723	-78.726	-117.92	-129.97	-89.05	-102.89
0.944	-92.731	-96.647	-78.481	-86.931	-71.76	-78.677	-117.94	-129.99	-89.056	-102.91
0.945	-92.762	-96.67	-78.5	-86.928	-71.794	-78.547	-117.87	-130	-89.052	-102.88
0.946	-92.725	-96.65	-78.516	-86.947	-71.777	-78.44	-117.82	-130.01	-89.061	-102.83
0.947	-92.684	-96.609	-78.503	-86.933	-71.754	-78.419	-117.76	-129.96	-89.076	-102.77
0.948	-92.66	-96.607	-78.466	-86.888	-71.744	-78.424	-117.71	-129.99	-89.049	-102.76
0.949	-92.619	-96.597	-78.504	-86.782	-71.741	-78.491	-117.7	-130.01	-89.049	-102.8
0.95	-92.547	-96.596	-78.563	-86.76	-71.682	-78.526	-117.66	-130.07	-89.07	-102.85
0.951	-92.481	-96.519	-78.54	-86.764	-71.681	-78.542	-117.66	-130.07	-89.048	-102.85
0.952	-92.481	-96.507	-78.536	-86.749	-71.646	-78.564	-117.68	-130.09	-89.042	-102.88
0.953	-92.518	-96.566	-78.548	-86.697	-71.619	-78.591	-117.66	-130.11	-89.11	-102.98
0.954	-92.495	-96.618	-78.591	-86.703	-71.62	-78.643	-117.54	-130.13	-89.17	-103.04
0.955	-92.437	-96.675	-78.591	-86.736	-71.57	-78.631	-117.47	-130.12	-89.182	-103.16
0.956	-92.493	-96.672	-78.62	-86.734	-71.532	-78.579	-117.39	-130.1	-89.18	-103.24
0.957	-92.505	-96.604	-78.63	-86.727	-71.553	-78.526	-117.3	-130.11	-89.192	-103.18
0.958	-92.573	-96.572	-78.653	-86.719	-71.616	-78.566	-117.2	-130.29	-89.2	-103.09
0.959	-92.678	-96.57	-78.59	-86.681	-71.61	-78.556	-117.07	-130.39	-89.199	-103.04
0.96	-92.662	-96.536	-78.657	-86.554	-71.603	-78.555	-116.96	-130.32	-89.226	-103.05
0.961	-92.639	-96.502	-78.688	-86.491	-71.647	-78.589	-116.92	-130.25	-89.267	-102.98
0.962	-92.628	-96.465	-78.72	-86.545	-71.681	-78.63	-116.93	-130.21	-89.349	-102.91
0.963	-92.643	-96.493	-78.657	-86.499	-71.683	-78.58	-116.98	-130.28	-89.39	-102.93
0.964	-92.547	-96.561	-78.663	-86.479	-71.712	-78.616	-116.97	-130.33	-89.394	-103.03
0.965	-92.55	-96.589	-78.619	-86.476	-71.756	-78.629	-116.9	-130.39	-89.464	-103.01
0.966	-92.551	-96.549	-78.63	-86.464	-71.744	-78.641	-116.87	-130.46	-89.419	-102.98
0.967	-92.639	-96.565	-78.652	-86.48	-71.728	-78.663	-116.84	-130.51	-89.359	-102.93
0.968	-92.653	-96.585	-78.655	-86.571	-71.769	-78.681	-116.73	-130.56	-89.405	-102.79
0.969	-92.669	-96.622	-78.632	-86.657	-71.803	-78.677	-116.57	-130.62	-89.407	-102.76
0.97	-92.671	-96.605	-78.573	-86.681	-71.778	-78.67	-116.42	-130.65	-89.339	-102.82
0.971	-92.607	-96.63	-78.596	-86.671	-71.786	-78.66	-116.38	-130.62	-89.288	-102.85
0.972	-92.602	-96.619	-78.568	-86.675	-71.769	-78.668	-116.36	-130.62	-89.3	-102.87
0.973	-92.645	-96.592	-78.559	-86.569	-71.805	-78.708	-116.37	-130.66	-89.297	-102.88
0.974	-92.706	-96.584	-78.522	-86.537	-71.819	-78.769	-116.41	-130.68	-89.321	-102.87
0.975	-92.7	-96.584	-78.47	-86.486	-71.81	-78.78	-116.43	-130.68	-89.359	-102.87
0.976	-92.649	-96.579	-78.481	-86.469	-71.832	-78.732	-116.45	-130.69	-89.418	-102.78
0.977	-92.601	-96.631	-78.48	-86.472	-71.887	-78.673	-116.44	-130.69	-89.432	-102.76
0.978	-92.654	-96.596	-78.479	-86.47	-71.855	-78.649	-116.44	-130.64	-89.458	-102.78
0.979	-92.681	-96.566	-78.457	-86.518	-71.878	-78.601	-116.44	-130.55	-89.505	-102.84
0.98	-92.628	-96.574	-78.471	-86.544	-71.83	-78.541	-116.44	-130.5	-89.54	-102.86
0.981	-92.545	-96.593	-78.416	-86.548	-71.802	-78.537	-116.4	-130.46	-89.661	-102.87
0.982	-92.546	-96.605	-78.413	-86.552	-71.779	-78.619	-116.36	-130.42	-89.721	-102.83
0.983	-92.597	-96.654	-78.414	-86.548	-71.759	-78.697	-116.29	-130.33	-89.701	-102.84
0.984	-92.629	-96.647	-78.455	-86.537	-71.776	-78.683	-116.28	-130.25	-89.582	-102.83
0.985	-92.602	-96.625	-78.492	-86.502	-71.76	-78.69	-116.3	-130.15	-89.489	-102.77
0.986	-92.578	-96.627	-78.464	-86.466	-71.746	-78.675	-116.29	-130.07	-89.406	-102.76
0.987	-92.514	-96.674	-78.511	-86.52	-71.724	-78.698	-116.26	-129.96	-89.346	-102.76
0.988	-92.505	-96.742	-78.6	-86.561	-71.723	-78.715	-116.24	-129.84	-89.32	-102.81
0.989	-92.519	-96.747	-78.647	-86.616	-71.722	-78.71	-116.14	-129.76	-89.222	-102.82
0.99	-92.509	-96.707	-78.679	-86.587	-71.695	-78.627	-115.99	-129.73	-89.138	-102.73
0.991	-92.509	-96.567	-78.683	-86.563	-71.713	-78.543	-115.96	-129.72	-89.121	-102.71
0.992	-92.495	-96.523	-78.712	-86.529	-71.726	-78.469	-116.02	-129.73	-89.191	-102.77
0.993	-92.521	-96.542	-78.599	-86.501	-71.74	-78.397	-116.07	-129.61	-89.289	-102.82
0.994	-92.534	-96.539	-78.631	-86.535	-71.738	-78.361	-116.08	-129.52	-89.38	-102.89
0.995	-92.564	-96.497	-78.651	-86.525	-71.738	-78.412	-116.07	-129.56	-89.461	-102.96
0.996	-92.546	-96.45	-78.619	-86.499	-71.789	-78.48	-115.96	-129.54	-89.44	-103.03
0.997	-92.414	-96.423	-78.595	-86.407	-71.825	-78.534	-115.91	-129.56	-89.514	-102.99
0.998	-92.419	-96.489	-78.503	-86.41	-71.819	-78.537	-115.91	-129.6	-89.548	-102.96
0.999	-92.44	-96.491	-78.474	-86.414	-71.809	-78.558	-115.94	-129.61	-89.577	-102.9
1	-92.422	-96.471	-78.469	-86.485	-71.858	-78.532	-115.97	-129.54	-89.586	-102.87
1.001	-92.396	-96.463	-78.418	-86.508	-71.927	-78.508	-115.91	-129.46	-89.537	-102.81
1.002	-92.407	-96.47	-78.382	-86.497	-71.928	-78.461	-115.98	-129.51	-89.506	-102.74
1.003	-92.428	-96.469	-78.374	-86.521	-71.891	-78.416	-115.97	-129.62	-89.522	-102.79
1.004	-92.358	-96.391	-78.405	-86.477	-71.839	-78.333	-115.7	-129.54	-89.544	-102.79
1.005	-92.133	-82.717	-78.245	-81.398	-71.796	-77.825	-101.05	-113.71	-84.858	-95.558
1.006	-81.294	-78.296	-73.478	-77.556	-69.628	-75.216	-98.517	-108.05	-83.008	-91.686
1.007	-78.108	-74.925	-71.877	-75.276	-68.866	-74.668	-96.308	-105.18	-81.686	-89.765
1.008	-75.518	-72.161	-70.742	-73.459	-68.234	-74.191	-94.371	-102.37	-80.582	-88.338
1.009	-73.318	-69.676	-69.731	-71.874	-67.735	-73.778	-92.597	-99.925	-79.801	-86.977
1.01	-71.333	-67.675	-68.857	-70.534	-67.31	-73.405	-90.85	-97.703	-78.865	-85.628
1.011	-69.719	-65.992	-67.976	-69.419	-66.889	-73.104	-89.434	-95.755	-78.239	-84.327
1.012	-68.412	-64.446	-67.301	-68.361	-66.558	-72.863	-88.003	-93.735	-77.501	-83.402
1.013	-67.19	-63.183	-66.621	-67.527	-66.242	-72.573	-86.831	-92.029	-77.011	-82.424
1.014	-66.042	-62.027	-66.042	-66.739	-66.002	-72.349	-85.637	-90.459	-76.322	-81.585
1.015	-65.104	-60.931	-65.628	-65.925	-65.715	-72.157	-84.39	-89.005	-75.892	-80.712
1.016	-64.189	-59.907	-65.09	-65.377	-65.435	-71.842	-83.389	-87.521	-75.466	-80.025
1.017	-63.451	-58.97	-64.743	-64.671	-65.253	-71.606	-82.593	-86.211	-75.008	-79.23
1.018	-62.693	-57.878	-64.515	-64.194	-65.08	-71.373	-81.567	-84.987	-74.634	-78.5
1.019	-62.096	-56.514	-64.179	-63.683	-64.922	-71.183	-80.852	-83.753	-74.359	-77.97
1.02	-61.322	-45.617	-63.917	-63.051	-64.837	-70.982	-80.077	-82.817	-73.959	-77.369
1.021	-60.857	-47.035	-63.677	-62.713	-64.69	-70.747	-79.303	-81.772	-73.455	-76.848
1.022	-60.344	-50.304	-63.464	-62.386	-64.505	-70.529	-78.626	-80.873	-73.013	-76.372
1.023	-59.797	-52.136	-63.207	-62.085	-64.447	-70.416	-78.03	-79.95	-72.629	-75.944
1.024	-59.312	-53.15	-62.977	-61.761	-64.333	-70.3	-77.415	-79.1	-72.296	-75.575
1.025	-58.434	-54.065	-62.792	-61.501	-64.278	-70.181	-76.893	-78.335	-72.113	-75.18
1.026	-57.869	-54.55	-62.748	-61.25	-64.215	-70.031	-76.341	-77.56	-71.867	-74.842
1.027	-56.652	-54.91	-62.666	-61.057	-64.154	-69.912	-75.806	-76.735	-71.618	-74.352
1.028	-48.173	-55.231	-62.517	-60.895	-64.108	-69.885	-75.294	-76.187	-71.412	-73.989
1.029	-49.082	-55.418	-62.407	-60.761	-64.016	-69.766	-74.917	-75.471	-71.236	-73.644
1.03	-52.298	-55.48	-62.283	-60.469	-64.008	-69.508	-74.375	-74.881	-70.997	-73.375
1.031	-54.167	-55.622	-62.232	-60.329	-63.967	-69.344	-74.02	-74.385	-70.755	-73.073
1.032	-55.405	-55.619	-62.211	-60.212	-63.9	-69.302	-73.656	-73.941	-70.612	-72.737
1.033	-56.307	-55.54	-62.21	-60.038	-63.863	-69.235	-73.245	-73.493	-70.257	-72.529
1.034	-56.947	-55.447	-62.127	-59.877	-63.867	-69.233	-72.878	-73.001	-70.067	-72.338
1.035	-57.55	-55.261	-62.061	-59.747	-63.816	-69.224	-72.576	-72.311	-69.899	-72.111
1.036	-57.993	-55.158	-62.018	-59.669	-63.83	-69.225	-72.304	-71.932	-69.792	-71.912
1.037	-58.296	-55.11	-62.012	-59.526	-63.876	-69.181	-72.012	-71.461	-69.738	-71.661
1.038	-58.457	-55.035	-62.01	-59.411	-63.944	-69.139	-71.728	-70.942	-69.611	-71.407
1.039	-58.606	-54.893	-62.005	-59.404	-63.974	-69.055	-71.446	-70.513	-69.396	-71.223
1.04	-58.777	-54.745	-61.954	-59.389	-63.992	-68.965	-71.196	-70.108	-69.298	-71
1.041	-58.876	-54.595	-61.968	-59.361	-63.996	-68.903	-70.955	-69.649	-69.24	-70.758
1.042	-58.986	-54.521	-61.897	-59.319	-63.989	-68.874	-70.713	-69.138	-69.261	-70.471
1.043	-59.033	-54.38	-61.886	-59.304	-64.002	-68.826	-70.478	-68.497	-69.184	-70.193
1.044	-59.111	-54.048	-61.88	-59.314	-63.976	-68.762	-70.297	-67.886	-69.041	-69.801
1.045	-59.205	-53.973	-61.909	-59.34	-63.924	-68.646	-70.021	-67.149	-68.989	-69.554
1.046	-59.281	-53.423	-61.907	-59.342	-63.93	-68.651	-69.73	-65.616	-68.825	-69.373
1.047	-59.309	-52.749	-61.871	-59.319	-63.911	-68.61	-69.473	-56.564	-68.721	-69.192
1.048	-59.323	-53.177	-61.854	-59.295	-63.925	-68.588	-69.252	-52.326	-68.605	-69.088
1.049	-59.322	-54.45	-61.849	-59.262	-63.93	-68.517	-68.872	-56.063	-68.5	-68.972
1.05	-59.298	-54.904	-61.796	-59.314	-63.957	-68.498	-68.583	-57.828	-68.407	-68.804
1.051	-59.263	-55.388	-61.835	-59.349	-63.944	-68.477	-68.311	-58.21	-68.383	-68.544
1.052	-59.232	-55.757	-61.821	-59.483	-63.877	-68.492	-68.115	-59.099	-68.303	-68.252
1.053	-59.223	-56.037	-61.904	-59.494	-63.866	-68.508	-67.742	-58.785	-68.237	-68.078
1.054	-59.251	-56.492	-61.93	-59.507	-63.879	-68.501	-67.412	-52.165	-68.196	-68.087
1.055	-59.262	-56.841	-61.96	-59.595	-63.926	-68.418	-67.042	-51.932	-68.133	-68.12
1.056	-59.233	-57.023	-61.974	-59.646	-63.926	-68.365	-66.649	-55.395	-68.081	-68.092
1.057	-59.229	-57.136	-62.052	-59.699	-63.918	-68.435	-66.057	-56.319	-68.064	-68.048
1.058	-59.265	-57.222	-62.073	-59.731	-63.94	-68.387	-65.164	-57.984	-68.073	-67.921
1.059	-59.32	-57.322	-62.107	-59.761	-63.987	-68.377	-59.521	-59.297	-68.081	-67.749
1.06	-59.368	-57.329	-62.194	-59.789	-64.015	-68.403	-60.043	-60.452	-68.118	-67.632
1.061	-59.421	-57.267	-62.214	-59.888	-64.039	-68.485	-58.426	-61.388	-68.051	-67.445
1.062	-59.399	-57.283	-62.217	-59.987	-64.022	-68.459	-59.578	-62.266	-68.012	-67.265
1.063	-59.367	-57.36	-62.206	-60.047	-64.037	-68.427	-58.756	-62.968	-67.947	-67.172
1.064	-59.356	-57.5	-62.191	-60.115	-64.037	-68.396	-59.749	-63.584	-67.921	-67.114
1.065	-59.365	-57.49	-62.168	-60.158	-64.043	-68.386	-60.329	-63.978	-67.93	-67.027
1.066	-59.423	-57.474	-62.145	-60.192	-64.034	-68.311	-60.616	-64.342	-67.972	-66.988
1.067	-59.45	-57.477	-62.181	-60.257	-64.088	-68.325	-60.801	-64.723	-68.013	-66.917
1.068	-59.409	-57.449	-62.185	-60.314	-64.134	-68.378	-61.288	-65.105	-67.936	-66.866
1.069	-59.386	-57.422	-62.145	-60.343	-64.18	-68.479	-61.672	-65.463	-67.86	-66.772
1.07	-59.325	-57.404	-62.136	-60.362	-64.195	-68.5	-62.132	-65.785	-67.903	-66.694
1.071	-59.258	-57.335	-62.139	-60.406	-64.255	-68.557	-62.443	-66.185	-67.934	-66.577
1.072	-59.334	-57.336	-62.136	-60.471	-64.194	-68.603	-62.815	-66.483	-67.958	-66.379
1.073	-59.342	-57.296	-62.188	-60.515	-64.142	-68.639	-63.162	-66.705	-67.986	-66.28
1.074	-59.32	-57.324	-62.277	-60.504	-64.137	-68.605	-63.548	-66.952	-67.96	-66.13
1.075	-59.292	-57.361	-62.249	-60.485	-64.15	-68.633	-63.866	-67.187	-68.025	-66.045
1.076	-59.352	-57.327	-62.192	-60.454	-64.154	-68.663	-64.177	-67.413	-68.062	-65.909
1.077	-59.417	-57.299	-62.168	-60.514	-64.161	-68.621	-64.626	-67.681	-68.047	-65.892
1.078	-59.335	-57.282	-62.232	-60.556	-64.148	-68.561	-64.846	-67.85	-68.002	-66.012
1.079	-59.388	-57.3	-62.238	-60.551	-64.124	-68.609	-65.144	-68.056	-68.029	-66.086
1.08	-59.333	-57.273	-62.268	-60.577	-64.138	-68.658	-65.459	-68.231	-68.014	-65.929
1.081	-59.388	-57.217	-62.238	-60.589	-64.164	-68.645	-65.754	-68.344	-68.039	-65.842
1.082	-59.357	-57.19	-62.281	-60.639	-64.152	-68.637	-66.02	-68.473	-68.09	-65.771
1.083	-59.414	-57.163	-62.264	-60.624	-64.121	-68.683	-66.351	-68.605	-68.13	-65.681
1.084	-59.426	-57.144	-62.281	-60.553	-64.116	-68.709	-66.583	-68.729	-68.179	-65.571
1.085	-59.492	-57.149	-62.331	-60.526	-64.132	-68.723	-66.78	-68.896	-68.27	-65.51
1.086	-59.552	-57.21	-62.289	-60.54	-64.112	-68.666	-67.009	-68.954	-68.306	-65.597
1.087	-59.565	-57.269	-62.24	-60.575	-64.083	-68.64	-67.16	-68.988	-68.393	-65.718
1.088	-59.609	-57.302	-62.266	-60.596	-64.1	-68.66	-67.221	-69.015	-68.413	-65.833
1.089	-59.585	-57.283	-62.273	-60.628	-64.095	-68.647	-67.364	-69	-68.401	-65.963
1.09	-59.592	-57.353	-62.352	-60.675	-64.092	-68.658	-67.575	-69.054	-68.384	-66.092
1.091	-59.567	-57.378	-62.363	-60.737	-64.094	-68.663	-67.706	-69.083	-68.389	-66.16
1.092	-59.603	-57.367	-62.326	-60.799	-64.111	-68.591	-67.826	-69.145	-68.341	-66.283
1.093	-59.627	-57.362	-62.344	-60.828	-64.153	-68.475	-67.958	-69.134	-68.413	-66.37
1.094	-59.625	-57.337	-62.38	-60.869	-64.175	-68.412	-68.093	-69.105	-68.457	-66.451
1.095	-59.626	-57.351	-62.377	-60.893	-64.16	-68.302	-68.183	-69.103	-68.469	-66.425
1.096	-59.719	-57.311	-62.387	-60.935	-64.151	-68.179	-68.305	-69.123	-68.37	-66.449
1.097	-59.744	-57.323	-62.402	-61.009	-64.152	-68.129	-68.36	-69.121	-68.306	-66.472
1.098	-59.702	-57.359	-62.392	-61.017	-64.165	-68.071	-68.527	-69.108	-68.326	-66.533
1.099	-59.699	-57.421	-62.422	-60.973	-64.167	-68.123	-68.688	-69.052	-68.336	-66.73
1.1	-59.664	-57.465	-62.489	-60.971	-64.181	-68.194	-68.77	-68.889	-68.405	-67.017
1.101	-59.692	-57.461	-62.509	-60.957	-64.102	-68.197	-68.897	-68.785	-68.45	-67.217
1.102	-59.763	-57.42	-62.48	-60.951	-64.051	-68.191	-68.993	-68.744	-68.567	-67.458
1.103	-59.907	-57.409	-62.489	-61.026	-64.061	-68.188	-69.03	-68.768	-68.666	-67.565
1.104	-59.915	-57.442	-62.495	-61.117	-64.08	-68.215	-69.038	-68.807	-68.731	-67.677
1.105	-59.936	-57.496	-62.497	-61.137	-64.088	-68.231	-69.031	-68.841	-68.71	-67.852
1.106	-59.948	-57.445	-62.53	-61.114	-64.073	-68.243	-69.115	-68.856	-68.808	-68.021
1.107	-59.973	-57.481	-62.524	-61.12	-64.101	-68.265	-69.177	-68.799	-68.858	-68.177
1.108	-59.951	-57.545	-62.573	-61.13	-64.111	-68.261	-69.161	-68.752	-68.845	-68.34
1.109	-59.94	-57.558	-62.637	-61.104	-64.152	-68.336	-69.147	-68.77	-68.793	-68.518
1.11	-59.945	-57.583	-62.637	-61.118	-64.117	-68.462	-69.179	-68.809	-68.804	-68.647
1.111	-59.95	-57.614	-62.643	-61.135	-64.089	-68.553	-69.22	-68.841	-68.838	-68.77
1.112	-59.973	-57.591	-62.625	-61.171	-64.094	-68.616	-69.219	-68.775	-68.836	-68.93
1.113	-59.947	-57.615	-62.687	-61.187	-64.116	-68.648	-69.213	-68.659	-68.759	-69.041
1.114	-59.941	-57.634	-62.679	-61.162	-64.133	-68.628	-69.264	-68.598	-68.712	-69.168
1.115	-59.991	-57.664	-62.677	-61.178	-64.103	-68.624	-69.214	-68.591	-68.707	-69.253
1.116	-60.011	-57.705	-62.696	-61.182	-64.068	-68.655	-69.207	-68.591	-68.671	-69.354
1.117	-60	-57.711	-62.632	-61.209	-64.067	-68.693	-69.276	-68.579	-68.6	-69.464
1.118	-59.983	-57.698	-62.601	-61.251	-64.061	-68.733	-69.316	-68.45	-68.537	-69.517
1.119	-60.011	-57.673	-62.622	-61.259	-64.092	-68.689	-69.334	-68.37	-68.508	-69.6
1.12	-59.986	-57.651	-62.608	-61.265	-64.105	-68.558	-69.379	-68.42	-68.513	-69.583
1.121	-59.947	-57.787	-62.606	-61.282	-64.11	-68.479	-69.362	-68.497	-68.605	-69.605
1.122	-59.947	-57.834	-62.598	-61.3	-64.12	-68.498	-69.292	-68.532	-68.681	-69.683
1.123	-59.976	-57.841	-62.581	-61.303	-64.175	-68.575	-69.151	-68.5	-68.735	-69.699
1.124	-59.991	-57.853	-62.574	-61.347	-64.199	-68.633	-69.118	-68.419	-68.744	-69.666
1.125	-59.994	-57.833	-62.563	-61.352	-64.178	-68.694	-69.133	-68.402	-68.765	-69.648
1.126	-60.041	-57.867	-62.556	-61.36	-64.245	-68.726	-69.151	-68.468	-68.83	-69.611
1.127	-60.01	-57.839	-62.553	-61.405	-64.245	-68.761	-69.201	-68.522	-68.893	-69.601
1.128	-60.092	-57.849	-62.566	-61.369	-64.231	-68.783	-69.183	-68.477	-68.899	-69.571
1.129	-60.099	-57.822	-62.534	-61.368	-64.222	-68.819	-69.152	-68.427	-68.889	-69.575
1.13	-60.098	-57.825	-62.458	-61.402	-64.236	-68.83	-69.156	-68.426	-68.876	-69.62
1.131	-60.052	-57.907	-62.4	-61.387	-64.187	-68.876	-69.157	-68.449	-68.888	-69.646
1.132	-60.133	-57.96	-62.357	-61.369	-64.186	-68.867	-69.132	-68.45	-68.905	-69.644
1.133	-60.126	-57.962	-62.33	-61.361	-64.178	-68.896	-69.063	-68.434	-68.884	-69.655
1.134	-60.088	-57.939	-62.357	-61.345	-64.174	-68.957	-69.018	-68.438	-68.844	-69.611
1.135	-60.14	-57.963	-62.365	-61.333	-64.208	-69.025	-69.004	-68.404	-68.731	-69.601
1.136	-60.182	-57.994	-62.348	-61.299	-64.224	-69.063	-68.95	-68.395	-68.69	-69.555
1.137	-60.136	-57.955	-62.376	-61.338	-64.259	-69.055	-68.895	-68.387	-68.681	-69.539
1.138	-60.163	-57.967	-62.455	-61.36	-64.281	-69.056	-68.854	-68.32	-68.673	-69.446
1.139	-60.208	-57.993	-62.473	-61.422	-64.279	-69.037	-68.822	-68.322	-68.684	-69.532
1.14	-60.208	-57.993	-62.489	-61.412	-64.199	-69.098	-68.876	-68.314	-68.687	-69.55
1.141	-60.201	-57.976	-62.489	-61.442	-64.177	-69.092	-68.975	-68.309	-68.743	-69.519
1.142	-60.211	-58.031	-62.499	-61.482	-64.218	-69.021	-69.019	-68.32	-68.73	-69.482
1.143	-60.265	-58.075	-62.535	-61.495	-64.208	-68.981	-68.971	-68.354	-68.558	-69.484
1.144	-60.301	-58.108	-62.555	-61.49	-64.242	-68.956	-68.944	-68.308	-68.546	-69.464
1.145	-60.279	-58.167	-62.616	-61.495	-64.267	-68.95	-68.851	-68.241	-68.586	-69.47
1.146	-60.31	-58.144	-62.656	-61.46	-64.228	-68.953	-68.848	-68.352	-68.581	-69.514
1.147	-60.301	-58.159	-62.635	-61.464	-64.206	-68.985	-68.896	-68.43	-68.569	-69.517
1.148	-60.36	-58.193	-62.662	-61.485	-64.219	-68.996	-68.942	-68.439	-68.614	-69.482
1.149	-60.413	-58.192	-62.638	-61.457	-64.248	-69.006	-69.011	-68.43	-68.675	-69.468
1.15	-60.395	-58.242	-62.645	-61.441	-64.249	-69.04	-69.044	-68.366	-68.689	-69.404
1.151	-60.405	-58.305	-62.621	-61.44	-64.247	-68.977	-69.071	-68.38	-68.53	-69.383
1.152	-60.391	-58.285	-62.616	-61.453	-64.235	-68.995	-69.036	-68.451	-68.397	-69.384
1.153	-60.345	-58.33	-62.605	-61.417	-64.239	-68.985	-69.002	-68.429	-68.289	-69.293
1.154	-60.36	-58.318	-62.633	-61.411	-64.268	-69.013	-69.02	-68.399	-68.175	-69.218
1.155	-60.381	-58.365	-62.672	-61.4	-64.257	-69.01	-69.028	-68.484	-68.11	-69.243
1.156	-60.444	-58.398	-62.679	-61.421	-64.283	-68.984	-69.056	-68.522	-68.184	-69.269
1.157	-60.431	-58.413	-62.673	-61.478	-64.279	-68.964	-69.036	-68.458	-68.367	-69.3
1.158	-60.445	-58.422	-62.703	-61.472	-64.245	-68.827	-69.03	-68.448	-68.452	-69.367
1.159	-60.465	-58.434	-62.762	-61.485	-64.269	-68.806	-69.034	-68.503	-68.489	-69.382
1.16	-60.485	-58.484	-62.754	-61.51	-64.28	-68.793	-69.076	-68.609	-68.503	-69.307
1.161	-60.465	-58.512	-62.747	-61.494	-64.292	-68.716	-69.05	-68.654	-68.51	-69.286
1.162	-60.496	-58.528	-62.713	-61.48	-64.264	-68.69	-69.007	-68.661	-68.502	-69.331
1.163	-60.525	-58.518	-62.718	-61.481	-64.224	-68.736	-68.9	-68.651	-68.595	-69.381
1.164	-60.528	-58.498	-62.763	-61.44	-64.226	-68.757	-68.829	-68.579	-68.687	-69.4
1.165	-60.542	-58.49	-62.829	-61.438	-64.235	-68.767	-68.762	-68.562	-68.849	-69.431
1.166	-60.556	-58.45	-62.757	-61.425	-64.255	-68.787	-68.765	-68.594	-68.974	-69.421
1.167	-60.566	-58.45	-62.845	-61.425	-64.232	-68.824	-68.746	-68.627	-69.118	-69.357
1.168	-60.572	-58.479	-62.856	-61.421	-64.198	-68.796	-68.642	-68.631	-69.231	-69.367
1.169	-60.574	-58.423	-62.869	-61.444	-64.219	-68.768	-68.629	-68.616	-69.377	-69.384
1.17	-60.557	-58.403	-62.877	-61.484	-64.183	-68.79	-68.675	-68.618	-69.468	-69.398
1.171	-60.499	-58.406	-62.765	-61.518	-64.188	-68.779	-68.702	-68.685	-69.553	-69.414
1.172	-60.438	-58.365	-62.727	-61.548	-64.209	-68.774	-68.729	-68.721	-69.613	-69.42
1.173	-60.475	-58.376	-62.856	-61.58	-64.203	-68.752	-68.811	-68.719	-69.645	-69.453
1.174	-60.485	-58.429	-62.827	-61.581	-64.172	-68.678	-68.942	-68.72	-69.597	-69.474
1.175	-60.418	-58.492	-62.754	-61.634	-64.197	-68.763	-69.022	-68.736	-69.542	-69.475
1.176	-60.425	-58.551	-62.718	-61.659	-64.174	-68.821	-69.066	-68.73	-69.511	-69.483
1.177	-60.476	-58.58	-62.755	-61.652	-64.164	-68.889	-69.088	-68.716	-69.525	-69.361
1.178	-60.469	-58.519	-62.75	-61.656	-64.144	-68.934	-69.098	-68.645	-69.537	-69.318
1.179	-60.502	-58.542	-62.683	-61.662	-64.147	-68.956	-69.116	-68.544	-69.54	-69.373
1.18	-60.603	-58.47	-62.692	-61.668	-64.138	-68.942	-69.107	-68.515	-69.598	-69.41
1.181	-60.582	-58.509	-62.647	-61.694	-64.135	-68.962	-69.11	-68.51	-69.629	-69.44
1.182	-60.522	-58.542	-62.549	-61.688	-64.099	-68.98	-69.023	-68.641	-69.641	-69.449
1.183	-60.536	-58.54	-62.563	-61.683	-64.106	-68.992	-68.919	-68.696	-69.682	-69.397
1.184	-60.603	-58.541	-62.598	-61.66	-64.113	-69.001	-68.867	-68.665	-69.682	-69.39
1.185	-60.626	-58.558	-62.6	-61.645	-64.16	-68.953	-68.883	-68.486	-69.699	-69.408
1.186	-60.582	-58.572	-62.544	-61.617	-64.204	-68.948	-68.904	-68.415	-69.751	-69.45
1.187	-60.61	-58.587	-62.524	-61.662	-64.245	-69.015	-68.973	-68.417	-69.803	-69.483
1.188	-60.685	-58.613	-62.524	-61.664	-64.266	-68.974	-69.03	-68.442	-69.832	-69.466
1.189	-60.672	-58.679	-62.553	-61.637	-64.297	-68.924	-69.037	-68.457	-69.824	-69.481
1.19	-60.656	-58.709	-62.628	-61.657	-64.281	-68.944	-68.944	-68.519	-69.817	-69.508
1.191	-60.564	-58.728	-62.643	-61.66	-64.289	-68.997	-68.916	-68.559	-69.824	-69.539
1.192	-60.572	-58.783	-62.594	-61.623	-64.326	-68.961	-68.908	-68.644	-69.864	-69.536
1.193	-60.542	-58.737	-62.559	-61.609	-64.354	-68.916	-68.867	-68.674	-69.887	-69.518
1.194	-60.552	-58.775	-62.565	-61.57	-64.384	-68.901	-68.846	-68.696	-69.871	-69.471
1.195	-60.562	-58.753	-62.667	-61.569	-64.335	-68.905	-68.835	-68.798	-69.805	-69.514
1.196	-60.597	-58.755	-62.688	-61.579	-64.293	-68.94	-68.842	-68.86	-69.712	-69.535
1.197	-60.543	-58.771	-62.708	-61.605	-64.29	-68.98	-68.78	-68.834	-69.609	-69.517
1.198	-60.56	-58.785	-62.719	-61.665	-64.284	-69.005	-68.744	-68.923	-69.572	-69.476
1.199	-60.557	-58.784	-62.693	-61.681	-64.257	-69.027	-68.777	-68.974	-69.516	-69.512
1.2	-60.586	-58.783	-62.627	-61.649	-64.262	-68.968	-68.841	-69.023	-69.461	-69.587
1.201	-60.574	-58.776	-62.677	-61.703	-64.246	-68.951	-68.935	-69.096	-69.392	-69.664
1.202	-60.584	-58.773	-62.743	-61.724	-64.211	-68.929	-68.989	-69.004	-69.333	-69.685
1.203	-60.58	-58.8	-62.751	-61.756	-64.175	-68.894	-68.983	-68.936	-69.305	-69.646
1.204	-60.56	-58.837	-62.76	-61.817	-64.141	-68.918	-68.986	-68.925	-69.265	-69.573
1.205	-60.514	-58.855	-62.809	-61.819	-64.159	-68.949	-68.98	-68.992	-69.197	-69.535
1.206	-60.483	-58.86	-62.775	-61.84	-64.149	-68.938	-68.983	-69.056	-69.171	-69.549
1.207	-60.565	-58.859	-62.798	-61.794	-64.172	-68.948	-68.994	-69.036	-69.142	-69.654
1.208	-60.609	-58.96	-62.825	-61.78	-64.189	-69.02	-69.005	-69.033	-69.094	-69.698
1.209	-60.626	-58.96	-62.801	-61.765	-64.216	-69.07	-69.004	-69.072	-69.14	-69.729
1.21	-60.662	-58.962	-62.856	-61.808	-64.192	-69.11	-68.999	-69.078	-69.215	-69.799
1.211	-60.71	-58.964	-62.827	-61.795	-64.279	-69.106	-69.039	-69.073	-69.25	-69.763
1.212	-60.679	-58.961	-62.759	-61.756	-64.299	-69.116	-69.073	-69.007	-69.192	-69.715
1.213	-60.685	-58.974	-62.749	-61.71	-64.304	-69.153	-69.108	-68.95	-69.241	-69.681
1.214	-60.664	-58.942	-62.768	-61.768	-64.392	-69.161	-69.141	-68.887	-69.301	-69.681
1.215	-60.708	-58.929	-62.732	-61.792	-64.402	-69.074	-69.046	-68.869	-69.262	-69.723
1.216	-60.715	-58.926	-62.676	-61.788	-64.387	-69.001	-68.982	-68.824	-69.194	-69.756
1.217	-60.752	-58.92	-62.696	-61.744	-64.339	-68.955	-68.976	-68.761	-69.023	-69.742
1.218	-60.757	-58.937	-62.756	-61.757	-64.324	-68.888	-68.972	-68.687	-68.968	-69.702
1.219	-60.733	-58.913	-62.804	-61.803	-64.328	-68.852	-68.91	-68.724	-68.987	-69.694
1.22	-60.752	-58.931	-62.85	-61.771	-64.376	-68.85	-68.844	-68.61	-69.083	-69.708
1.221	-60.725	-58.921	-62.881	-61.805	-64.386	-68.827	-68.823	-68.547	-69.142	-69.662
1.222	-60.74	-58.927	-62.754	-61.804	-64.443	-68.809	-68.769	-68.517	-69.164	-69.662
1.223	-60.802	-58.918	-62.785	-61.814	-64.485	-68.858	-68.729	-68.461	-69.167	-69.651
1.224	-60.838	-58.889	-62.812	-61.867	-64.494	-68.89	-68.712	-68.429	-69.255	-69.641
1.225	-60.835	-58.884	-62.787	-61.853	-64.477	-68.883	-68.693	-68.405	-69.277	-69.636
1.226	-60.818	-58.902	-62.783	-61.842	-64.487	-68.871	-68.683	-68.451	-69.306	-69.642
1.227	-60.787	-58.98	-62.754	-61.847	-64.511	-68.808	-68.72	-68.51	-69.378	-69.572
1.228	-60.766	-58.984	-62.669	-61.875	-64.517	-68.734	-68.733	-68.549	-69.425	-69.572
1.229	-60.81	-59.021	-62.666	-61.908	-64.466	-68.73	-68.684	-68.61	-69.436	-69.59
1.23	-60.837	-59.025	-62.644	-61.92	-64.443	-68.787	-68.638	-68.63	-69.399	-69.613
1.231	-60.838	-59.046	-62.588	-61.94	-64.481	-68.856	-68.665	-68.647	-69.417	-69.55
1.232	-60.865	-59.027	-62.594	-61.899	-64.501	-68.857	-68.679	-68.646	-69.416	-69.489
1.233	-60.909	-59.044	-62.665	-61.873	-64.513	-68.864	-68.731	-68.7	-69.423	-69.469
1.234	-60.858	-59.055	-62.728	-61.885	-64.497	-68.868	-68.725	-68.699	-69.423	-69.494
1.235	-60.932	-59.033	-62.817	-61.937	-64.445	-68.889	-68.759	-68.68	-69.415	-69.562
1.236	-60.875	-59.014	-62.838	-61.925	-64.369	-68.935	-68.754	-68.629	-69.34	-69.533
1.237	-60.815	-58.998	-62.861	-61.884	-64.349	-68.963	-68.737	-68.575	-69.285	-69.51
1.238	-60.819	-58.964	-62.901	-61.861	-64.386	-68.964	-68.699	-68.655	-69.279	-69.532
1.239	-60.815	-58.964	-62.847	-61.887	-64.289	-69.016	-68.67	-68.609	-69.365	-69.646
1.24	-60.781	-58.985	-62.859	-61.889	-64.218	-69.035	-68.644	-68.538	-69.424	-69.69
1.241	-60.769	-58.998	-62.839	-61.878	-64.191	-69	-68.634	-68.527	-69.382	-69.683
1.242	-60.754	-59.031	-62.885	-61.854	-64.267	-69.007	-68.668	-68.592	-69.339	-69.64
1.243	-60.821	-59.124	-62.923	-61.835	-64.352	-69.1	-68.778	-68.661	-69.343	-69.593
1.244	-60.955	-59.097	-62.831	-61.786	-64.364	-69.182	-68.884	-68.707	-69.338	-69.548
1.245	-60.942	-59.054	-62.873	-61.769	-64.254	-69.196	-68.968	-68.742	-69.337	-69.557
1.246	-61.006	-59.073	-62.83	-61.756	-64.27	-69.213	-68.982	-68.755	-69.318	-69.497
1.247	-61.023	-59.075	-62.894	-61.766	-64.28	-69.24	-68.997	-68.81	-69.292	-69.446
1.248	-61.018	-59.074	-62.907	-61.785	-64.282	-69.216	-69.069	-68.825	-69.304	-69.441
1.249	-61.025	-59.084	-62.853	-61.77	-64.266	-69.166	-69.158	-68.831	-69.279	-69.438
1.25	-60.882	-59.128	-62.849	-61.764	-64.237	-69.103	-69.196	-68.874	-69.327	-69.444
1.251	-60.876	-59.111	-62.885	-61.764	-64.243	-69.007	-69.221	-68.87	-69.347	-69.46
1.252	-60.897	-59.138	-62.919	-61.83	-64.248	-69.048	-69.209	-68.865	-69.392	-69.514
1.253	-60.878	-59.12	-62.952	-61.897	-64.289	-69.105	-69.205	-68.841	-69.417	-69.466
1.254	-60.878	-59.097	-62.97	-61.924	-64.301	-69.078	-69.139	-68.887	-69.481	-69.421
1.255	-60.906	-59.085	-63.018	-61.926	-64.26	-69.053	-69.064	-68.878	-69.509	-69.335
1.256	-60.854	-59.08	-63.029	-61.948	-64.279	-69.059	-69.011	-68.844	-69.54	-69.202
1.257	-60.85	-59.108	-63.005	-61.966	-64.292	-69.01	-68.967	-68.859	-69.523	-69.146
1.258	-60.964	-59.137	-63.018	-61.995	-64.318	-69	-68.971	-68.881	-69.471	-69.231
1.259	-60.899	-59.122	-63.003	-61.968	-64.363	-69.023	-68.993	-68.828	-69.436	-69.255
1.26	-60.902	-59.103	-63.021	-61.925	-64.332	-69.039	-68.993	-68.791	-69.463	-69.266
1.261	-60.974	-59.105	-63.035	-61.914	-64.356	-69.065	-68.919	-68.762	-69.51	-69.289
1.262	-61.049	-59.059	-63.044	-61.887	-64.352	-69.161	-68.912	-68.712	-69.479	-69.324
1.263	-61	-59.042	-63.042	-61.929	-64.298	-69.182	-68.924	-68.688	-69.461	-69.29
1.264	-60.982	-59.058	-63.013	-61.975	-64.295	-69.211	-68.914	-68.701	-69.48	-69.272
1.265	-61.01	-59.119	-63.024	-61.938	-64.315	-69.281	-68.939	-68.752	-69.39	-69.3
1.266	-60.989	-59.074	-63.023	-61.894	-64.357	-69.345	-68.936	-68.797	-69.208	-69.294
1.267	-61.099	-59.027	-63.041	-61.908	-64.352	-69.345	-68.947	-68.791	-69.162	-69.212
1.268	-61.132	-59.062	-63.067	-61.913	-64.332	-69.353	-68.898	-68.768	-69.194	-69.182
1.269	-61.019	-59.077	-63.099	-61.916	-64.304	-69.461	-68.899	-68.769	-69.307	-69.187
1.27	-61.068	-59.107	-63.076	-61.924	-64.36	-69.577	-68.925	-68.749	-69.371	-69.183
1.271	-61.128	-59.146	-63.078	-61.98	-64.367	-69.59	-68.976	-68.732	-69.407	-69.138
1.272	-61.134	-59.148	-63.029	-61.995	-64.391	-69.604	-68.95	-68.719	-69.413	-69.18
1.273	-61.137	-59.065	-62.995	-62.015	-64.399	-69.602	-68.816	-68.754	-69.498	-69.256
1.274	-61.106	-59.152	-62.971	-62.028	-64.363	-69.595	-68.754	-68.737	-69.505	-69.312
1.275	-61.025	-59.177	-62.979	-62.005	-64.324	-69.605	-68.827	-68.666	-69.492	-69.376
1.276	-61.025	-59.198	-62.885	-61.999	-64.368	-69.621	-68.837	-68.64	-69.507	-69.389
1.277	-61.048	-59.207	-62.914	-62.035	-64.384	-69.575	-68.876	-68.695	-69.535	-69.366
1.278	-61.046	-59.229	-62.897	-62.029	-64.386	-69.479	-68.906	-68.744	-69.593	-69.367
1.279	-61.056	-59.228	-62.893	-62.062	-64.383	-69.442	-68.93	-68.778	-69.631	-69.455
1.28	-61.049	-59.208	-62.867	-62.139	-64.398	-69.419	-68.992	-68.802	-69.696	-69.542
1.281	-61.036	-59.225	-62.793	-62.181	-64.385	-69.431	-69.057	-68.743	-69.754	-69.649
1.282	-60.989	-59.261	-62.788	-62.154	-64.43	-69.417	-69.12	-68.692	-69.718	-69.629
1.283	-60.961	-59.273	-62.806	-62.113	-64.487	-69.413	-69.154	-68.672	-69.694	-69.609
1.284	-60.998	-59.221	-62.854	-62.091	-64.49	-69.404	-69.156	-68.728	-69.66	-69.553
1.285	-61.048	-59.295	-62.806	-62.135	-64.549	-69.347	-69.136	-68.792	-69.712	-69.602
1.286	-61.067	-59.343	-62.822	-62.105	-64.578	-69.318	-69.132	-68.845	-69.732	-69.664
1.287	-60.997	-59.394	-62.844	-62.06	-64.62	-69.267	-69.162	-68.896	-69.801	-69.76
1.288	-61.054	-59.4	-62.733	-62.096	-64.613	-69.177	-69.187	-68.903	-69.833	-69.745
1.289	-61.128	-59.347	-62.634	-62.123	-64.589	-69.102	-69.199	-68.957	-69.808	-69.775
1.29	-61.144	-59.284	-62.656	-62.108	-64.573	-69.086	-69.201	-69.023	-69.783	-69.767
1.291	-61.114	-59.261	-62.758	-62.133	-64.584	-69.101	-69.195	-69.058	-69.803	-69.79
1.292	-61.134	-59.368	-62.776	-62.135	-64.594	-69.176	-69.174	-69.042	-69.85	-69.851
1.293	-61.202	-59.39	-62.852	-62.105	-64.587	-69.173	-69.156	-69.064	-69.896	-69.935
1.294	-61.224	-59.345	-62.835	-62.092	-64.555	-69.185	-69.152	-69.05	-69.855	-69.965
1.295	-61.219	-59.279	-62.847	-62.1	-64.529	-69.169	-69.083	-69.023	-69.842	-69.955
1.296	-61.197	-59.312	-62.833	-62.078	-64.509	-69.115	-69.035	-69.057	-69.856	-69.964
1.297	-61.202	-59.343	-62.794	-62.07	-64.514	-69.086	-68.998	-69.078	-69.906	-69.957
1.298	-61.174	-59.362	-62.778	-62.098	-64.537	-69.102	-68.927	-69.097	-69.961	-69.955
1.299	-61.128	-59.41	-62.854	-62.056	-64.527	-69.141	-68.951	-69.072	-70	-69.936
1.3	-61.124	-59.47	-62.906	-61.962	-64.454	-69.106	-69.04	-68.964	-69.95	-69.878
1.301	-61.105	-59.461	-62.912	-61.93	-64.371	-69.14	-69.149	-68.882	-69.907	-69.872
1.302	-61.132	-59.393	-62.948	-61.907	-64.348	-69.149	-69.243	-68.879	-69.86	-69.919
1.303	-61.157	-59.39	-62.897	-61.942	-64.405	-69.134	-69.304	-68.903	-69.693	-69.906
1.304	-61.167	-59.393	-62.922	-61.976	-64.43	-69.218	-69.243	-68.919	-69.626	-69.81
1.305	-61.161	-59.359	-62.903	-61.988	-64.405	-69.231	-69.092	-68.912	-69.633	-69.79
1.306	-61.137	-59.272	-62.994	-62.006	-64.383	-69.217	-69.062	-68.953	-69.696	-69.805
1.307	-61.183	-59.281	-62.94	-61.973	-64.361	-69.194	-69.013	-69.002	-69.704	-69.802
1.308	-61.173	-59.289	-62.931	-61.922	-64.393	-69.172	-68.934	-69.08	-69.734	-69.78
1.309	-61.169	-59.335	-62.939	-61.919	-64.348	-69.135	-68.882	-69.085	-69.744	-69.754
1.31	-61.119	-59.367	-62.907	-61.938	-64.35	-69.118	-68.883	-69.116	-69.661	-69.727
1.311	-61.234	-59.26	-62.955	-61.998	-64.393	-69.124	-68.893	-69.109	-69.638	-69.746
1.312	-61.213	-59.21	-62.933	-62.01	-64.39	-69.141	-68.938	-68.993	-69.666	-69.733
1.313	-61.198	-59.207	-62.934	-62.029	-64.385	-69.184	-68.905	-68.956	-69.663	-69.741
1.314	-61.211	-59.237	-62.997	-62.032	-64.413	-69.205	-68.803	-68.991	-69.672	-69.754
1.315	-61.258	-59.32	-62.998	-61.998	-64.414	-69.204	-68.739	-68.992	-69.671	-69.826
1.316	-61.286	-59.352	-63.019	-61.989	-64.423	-69.193	-68.75	-69.011	-69.613	-69.86
1.317	-61.314	-59.336	-63.057	-61.994	-64.319	-69.125	-68.794	-69.058	-69.624	-69.832
1.318	-61.224	-59.349	-63.055	-62.033	-64.249	-69.112	-68.899	-69.117	-69.593	-69.723
1.319	-61.215	-59.355	-62.991	-62.058	-64.186	-69.121	-68.881	-69.137	-69.606	-69.704
1.32	-61.218	-59.371	-62.989	-62.048	-64.137	-69.094	-68.927	-69.08	-69.602	-69.698
1.321	-61.228	-59.398	-63.052	-62.037	-64.151	-69.017	-68.988	-68.996	-69.533	-69.666
1.322	-61.193	-59.372	-63.053	-62.004	-64.18	-68.993	-69.021	-69.035	-69.519	-69.708
1.323	-61.207	-59.383	-63.053	-61.976	-64.164	-68.938	-69.068	-69.174	-69.507	-69.714
1.324	-61.245	-59.361	-63.001	-61.962	-64.165	-68.951	-69.07	-69.297	-69.487	-69.752
1.325	-61.243	-59.386	-62.966	-61.97	-64.2	-68.919	-69.069	-69.342	-69.421	-69.762
1.326	-61.212	-59.405	-62.975	-61.985	-64.261	-68.939	-69.047	-69.3	-69.341	-69.704
1.327	-61.256	-59.407	-62.975	-62.052	-64.322	-69.041	-69.058	-69.263	-69.271	-69.697
1.328	-61.262	-59.425	-62.943	-62.116	-64.318	-69.092	-69.052	-69.303	-69.27	-69.792
1.329	-61.218	-59.43	-62.904	-62.148	-64.326	-69.093	-68.996	-69.359	-69.204	-69.817
1.33	-61.173	-59.412	-62.89	-62.15	-64.353	-69.043	-69.017	-69.386	-69.157	-69.811
1.331	-61.198	-59.446	-62.87	-62.152	-64.39	-69.052	-68.982	-69.379	-69.126	-69.807
1.332	-61.202	-59.448	-62.907	-62.135	-64.397	-69.081	-68.956	-69.397	-69.205	-69.791
1.333	-61.222	-59.491	-62.908	-62.204	-64.359	-69.135	-68.966	-69.402	-69.253	-69.715
1.334	-61.242	-59.525	-62.919	-62.252	-64.323	-69.146	-68.988	-69.432	-69.299	-69.574
1.335	-61.256	-59.589	-62.953	-62.24	-64.312	-69.145	-68.948	-69.451	-69.322	-69.634
1.336	-61.299	-59.624	-62.944	-62.249	-64.32	-69.143	-68.88	-69.542	-69.304	-69.689
1.337	-61.283	-59.651	-62.955	-62.265	-64.318	-69.069	-68.852	-69.611	-69.211	-69.709
1.338	-61.302	-59.705	-62.955	-62.275	-64.302	-69.087	-68.824	-69.631	-69.198	-69.753
1.339	-61.309	-59.753	-63.006	-62.291	-64.245	-69.13	-68.767	-69.669	-69.18	-69.758
1.34	-61.297	-59.758	-62.997	-62.278	-64.247	-69.112	-68.741	-69.634	-69.164	-69.758
1.341	-61.244	-59.694	-63.001	-62.264	-64.326	-69.038	-68.775	-69.622	-69.175	-69.809
1.342	-61.277	-59.704	-62.986	-62.29	-64.326	-68.953	-68.886	-69.578	-69.209	-69.825
1.343	-61.253	-59.688	-62.977	-62.312	-64.329	-68.814	-68.946	-69.611	-69.261	-69.84
1.344	-61.294	-59.698	-62.934	-62.309	-64.387	-68.799	-69.012	-69.619	-69.355	-69.797
1.345	-61.321	-59.697	-63.008	-62.286	-64.415	-68.788	-69.07	-69.583	-69.446	-69.823
1.346	-61.374	-59.707	-62.952	-62.279	-64.439	-68.781	-69.238	-69.534	-69.45	-69.809
1.347	-61.447	-59.738	-62.974	-62.269	-64.442	-68.75	-69.324	-69.495	-69.349	-69.819
1.348	-61.424	-59.729	-62.94	-62.234	-64.46	-68.777	-69.328	-69.488	-69.269	-69.851
1.349	-61.441	-59.728	-62.933	-62.23	-64.443	-68.742	-69.299	-69.512	-69.168	-69.86
1.35	-61.479	-59.693	-62.932	-62.231	-64.461	-68.755	-69.349	-69.534	-69.024	-69.846
1.351	-61.499	-59.672	-62.945	-62.208	-64.399	-68.817	-69.356	-69.549	-68.973	-69.832
1.352	-61.488	-59.657	-62.934	-62.174	-64.388	-68.865	-69.312	-69.514	-68.973	-69.887
1.353	-61.472	-59.649	-62.952	-62.163	-64.435	-68.864	-69.322	-69.518	-68.972	-69.947
1.354	-61.437	-59.626	-63.018	-62.162	-64.448	-68.848	-69.325	-69.57	-68.994	-69.931
1.355	-61.439	-59.586	-63.039	-62.146	-64.462	-68.809	-69.381	-69.556	-69.046	-69.843
1.356	-61.361	-59.545	-63.055	-62.134	-64.446	-68.764	-69.387	-69.589	-69.071	-69.769
1.357	-61.376	-59.529	-63.059	-62.155	-64.491	-68.796	-69.367	-69.566	-69.057	-69.732
1.358	-61.351	-59.522	-63.072	-62.214	-64.506	-68.843	-69.413	-69.555	-69.098	-69.694
1.359	-61.339	-59.519	-62.972	-62.245	-64.504	-68.894	-69.431	-69.52	-69.132	-69.611
1.36	-61.39	-59.527	-62.973	-62.162	-64.537	-68.952	-69.446	-69.513	-69.127	-69.499
1.361	-61.409	-59.494	-62.961	-62.119	-64.461	-68.939	-69.489	-69.514	-69.14	-69.484
1.362	-61.447	-59.504	-63.013	-62.142	-64.424	-68.939	-69.474	-69.555	-69.122	-69.518
1.363	-61.384	-59.508	-63.043	-62.119	-64.32	-68.912	-69.487	-69.573	-69.106	-69.509
1.364	-61.344	-59.54	-63.047	-62.11	-64.304	-68.967	-69.52	-69.557	-69.108	-69.482
1.365	-61.318	-59.599	-63.053	-62.065	-64.343	-68.991	-69.471	-69.504	-69.052	-69.472
1.366	-61.374	-59.64	-63.134	-62.072	-64.295	-69.002	-69.436	-69.408	-69.034	-69.492
1.367	-61.378	-59.643	-63.103	-62.065	-64.265	-68.987	-69.368	-69.355	-69.071	-69.487
1.368	-61.302	-59.672	-63.132	-62.058	-64.257	-68.988	-69.401	-69.317	-69.083	-69.47
1.369	-61.241	-59.653	-63.126	-62.071	-64.26	-68.978	-69.44	-69.262	-69.107	-69.441
1.37	-61.31	-59.65	-63.129	-62.076	-64.291	-68.991	-69.42	-69.247	-69.066	-69.419
1.371	-61.315	-59.641	-63.084	-62.141	-64.34	-68.947	-69.376	-69.008	-69.055	-69.394
1.372	-61.294	-59.68	-63.065	-62.129	-64.336	-68.887	-69.301	-68.982	-69.118	-69.41
1.373	-61.262	-59.683	-63.07	-62.123	-64.336	-68.884	-69.268	-69.007	-69.189	-69.43
1.374	-61.27	-59.734	-63.024	-62.128	-64.336	-68.87	-69.213	-69.038	-69.221	-69.487
1.375	-61.281	-59.759	-63.01	-62.137	-64.342	-68.991	-69.191	-68.98	-69.283	-69.511
1.376	-61.295	-59.804	-63.026	-62.176	-64.392	-69.082	-69.176	-69.021	-69.351	-69.513
1.377	-61.311	-59.817	-63.019	-62.182	-64.476	-69.149	-69.208	-69.092	-69.407	-69.535
1.378	-61.277	-59.814	-63.026	-62.195	-64.47	-69.141	-69.211	-69.029	-69.431	-69.564
1.379	-61.32	-59.794	-63.064	-62.191	-64.431	-69.15	-69.225	-69.01	-69.507	-69.579
1.38	-61.302	-59.787	-63.119	-62.234	-64.441	-69.16	-69.297	-69.043	-69.552	-69.617
1.381	-61.383	-59.716	-63.064	-62.221	-64.436	-69.17	-69.309	-69.087	-69.492	-69.676
1.382	-61.348	-59.724	-63.029	-62.225	-64.436	-69.155	-69.349	-69.091	-69.52	-69.719
1.383	-61.385	-59.691	-63.02	-62.231	-64.396	-69.112	-69.35	-69.071	-69.594	-69.586
1.384	-61.416	-59.684	-63.025	-62.238	-64.385	-69.099	-69.339	-69.035	-69.655	-69.503
1.385	-61.413	-59.698	-63.036	-62.271	-64.424	-69.09	-69.275	-69.063	-69.661	-69.542
1.386	-61.37	-59.728	-63.04	-62.262	-64.467	-69.065	-69.209	-69.047	-69.793	-69.625
1.387	-61.284	-59.707	-63.071	-62.239	-64.546	-69.005	-69.139	-69.077	-69.882	-69.67
1.388	-61.311	-59.707	-63.094	-62.227	-64.615	-68.935	-69.083	-69.1	-69.975	-69.668
1.389	-61.292	-59.732	-63.097	-62.218	-64.642	-68.91	-69.055	-69.118	-70.041	-69.644
1.39	-61.326	-59.757	-63.074	-62.258	-64.609	-68.859	-69.055	-69.119	-70.087	-69.593
1.391	-61.375	-59.751	-63.105	-62.232	-64.555	-68.846	-68.992	-69.128	-70.055	-69.641
1.392	-61.416	-59.754	-63.058	-62.238	-64.549	-68.873	-68.99	-69.15	-70.031	-69.658
1.393	-61.448	-59.746	-63.107	-62.242	-64.545	-68.927	-69.056	-69.21	-70.03	-69.608
1.394	-61.479	-59.789	-63.06	-62.257	-64.558	-68.957	-69.153	-69.361	-70.047	-69.546
1.395	-61.479	-59.794	-63.007	-62.23	-64.536	-68.89	-69.167	-69.414	-70.021	-69.538
1.396	-61.532	-59.786	-63.027	-62.211	-64.489	-68.875	-69.121	-69.388	-70.035	-69.501
1.397	-61.554	-59.796	-63.065	-62.251	-64.476	-68.956	-69.128	-69.384	-70.04	-69.542
1.398	-61.552	-59.813	-63.133	-62.273	-64.5	-69.031	-69.129	-69.38	-70.032	-69.501
1.399	-61.496	-59.846	-63.126	-62.262	-64.492	-69.036	-69.114	-69.395	-70.077	-69.378
1.4	-61.496	-59.864	-63.13	-62.214	-64.457	-68.994	-69.083	-69.461	-70.139	-69.248
1.401	-61.514	-59.86	-63.148	-62.195	-64.447	-68.989	-69.14	-69.469	-70.135	-69.284
1.402	-61.459	-59.868	-63.203	-62.213	-64.449	-68.993	-69.195	-69.411	-70.07	-69.307
1.403	-61.425	-59.87	-63.237	-62.23	-64.431	-69.086	-69.177	-69.344	-70.107	-69.296
1.404	-61.478	-59.846	-63.206	-62.242	-64.405	-69.149	-69.148	-69.365	-70.176	-69.293
1.405	-61.529	-59.844	-63.258	-62.232	-64.392	-69.203	-69.156	-69.353	-70.2	-69.292
1.406	-61.501	-59.858	-63.269	-62.26	-64.398	-69.293	-69.174	-69.327	-70.169	-69.278
1.407	-61.546	-59.869	-63.255	-62.257	-64.451	-69.398	-69.228	-69.302	-70.132	-69.332
1.408	-61.484	-59.881	-63.277	-62.274	-64.457	-69.455	-69.312	-69.277	-70.185	-69.382
1.409	-61.521	-59.884	-63.278	-62.294	-64.459	-69.47	-69.325	-69.208	-70.248	-69.426
1.41	-61.478	-59.884	-63.258	-62.266	-64.439	-69.462	-69.368	-69.149	-70.258	-69.446
1.411	-61.508	-59.877	-63.287	-62.267	-64.408	-69.475	-69.406	-69.122	-70.219	-69.481
1.412	-61.441	-59.906	-63.288	-62.246	-64.426	-69.504	-69.46	-69.093	-70.129	-69.53
1.413	-61.482	-59.888	-63.216	-62.237	-64.441	-69.531	-69.486	-69.054	-70.049	-69.544
1.414	-61.517	-59.909	-63.19	-62.269	-64.467	-69.463	-69.493	-69.096	-69.984	-69.612
1.415	-61.593	-59.923	-63.168	-62.238	-64.487	-69.384	-69.519	-69.13	-69.886	-69.601
1.416	-61.566	-59.903	-63.067	-62.182	-64.491	-69.3	-69.493	-69.062	-69.829	-69.6
1.417	-61.585	-59.881	-63.001	-62.19	-64.474	-69.296	-69.503	-69.039	-69.736	-69.565
1.418	-61.542	-59.877	-63.021	-62.202	-64.483	-69.283	-69.537	-69.073	-69.645	-69.569
1.419	-61.548	-59.923	-63.027	-62.19	-64.442	-69.249	-69.553	-69.09	-69.582	-69.599
1.42	-61.603	-59.965	-63.023	-62.137	-64.473	-69.273	-69.524	-69.032	-69.537	-69.58
1.421	-61.638	-59.991	-63.026	-62.139	-64.448	-69.295	-69.545	-69.019	-69.56	-69.599
1.422	-61.632	-59.997	-63.052	-62.191	-64.45	-69.225	-69.49	-68.998	-69.646	-69.595
1.423	-61.678	-59.993	-63.084	-62.202	-64.453	-69.171	-69.45	-68.913	-69.757	-69.638
1.424	-61.7	-59.946	-63.086	-62.251	-64.47	-69.161	-69.44	-68.906	-69.817	-69.635
1.425	-61.666	-59.944	-63.127	-62.277	-64.472	-69.12	-69.473	-68.91	-69.829	-69.671
1.426	-61.72	-59.955	-63.111	-62.306	-64.468	-69.134	-69.472	-68.979	-69.859	-69.661
1.427	-61.646	-59.972	-63.095	-62.334	-64.481	-69.096	-69.431	-68.968	-69.907	-69.683
1.428	-61.512	-59.948	-63.161	-62.35	-64.468	-69.055	-69.478	-69.003	-69.897	-69.724
1.429	-61.538	-59.935	-63.11	-62.389	-64.471	-69.082	-69.442	-69.045	-69.853	-69.734
1.43	-61.536	-59.907	-63.033	-62.398	-64.502	-69.099	-69.428	-69.08	-69.894	-69.73
1.431	-61.524	-59.897	-63.062	-62.319	-64.526	-69.064	-69.468	-69.084	-69.912	-69.721
1.432	-61.587	-59.897	-63.122	-62.32	-64.515	-69.067	-69.451	-69.13	-69.889	-69.751
1.433	-61.564	-59.908	-63.125	-62.336	-64.505	-69.092	-69.376	-69.203	-69.855	-69.781
1.434	-61.621	-59.885	-63.161	-62.405	-64.509	-69.134	-69.366	-69.299	-69.774	-69.773
1.435	-61.563	-59.812	-63.17	-62.403	-64.512	-69.147	-69.382	-69.306	-69.777	-69.803
1.436	-61.602	-59.829	-63.166	-62.354	-64.56	-69.18	-69.419	-69.347	-69.757	-69.855
1.437	-61.64	-59.867	-63.161	-62.362	-64.613	-69.202	-69.393	-69.39	-69.716	-69.869
1.438	-61.633	-59.933	-63.169	-62.371	-64.632	-69.155	-69.354	-69.428	-69.646	-69.875
1.439	-61.627	-59.962	-63.129	-62.41	-64.612	-69.15	-69.329	-69.521	-69.632	-69.9
1.44	-61.648	-59.934	-63.12	-62.463	-64.637	-69.127	-69.356	-69.533	-69.644	-69.9
1.441	-61.654	-59.89	-63.092	-62.471	-64.678	-69.079	-69.322	-69.578	-69.696	-69.828
1.442	-61.641	-59.891	-63.108	-62.477	-64.723	-69.078	-69.285	-69.549	-69.844	-69.786
1.443	-61.636	-59.907	-63.091	-62.476	-64.748	-69.055	-69.334	-69.539	-69.897	-69.754
1.444	-61.643	-59.931	-63.047	-62.462	-64.715	-69.005	-69.403	-69.602	-69.91	-69.807
1.445	-61.676	-59.963	-62.996	-62.411	-64.693	-68.895	-69.403	-69.651	-69.934	-69.888
1.446	-61.64	-59.952	-63.03	-62.44	-64.71	-68.858	-69.361	-69.653	-69.844	-69.886
1.447	-61.639	-59.961	-62.998	-62.434	-64.756	-68.89	-69.379	-69.681	-69.695	-69.905
1.448	-61.621	-60.007	-63.002	-62.419	-64.704	-68.916	-69.358	-69.702	-69.666	-69.809
1.449	-61.653	-60.02	-62.994	-62.419	-64.596	-68.896	-69.369	-69.699	-69.642	-69.815
1.45	-61.723	-60.004	-62.998	-62.417	-64.556	-68.856	-69.256	-69.647	-69.551	-69.888
1.451	-61.693	-60.025	-63.068	-62.419	-64.483	-68.894	-69.228	-69.586	-69.454	-69.972
1.452	-61.645	-60.047	-63.064	-62.426	-64.429	-68.918	-69.186	-69.575	-69.413	-69.971
1.453	-61.583	-60.054	-63.107	-62.412	-64.394	-68.923	-69.093	-69.578	-69.378	-69.991
1.454	-61.604	-60.035	-63.173	-62.409	-64.446	-69.002	-69.04	-69.621	-69.32	-70.026
1.455	-61.633	-60.005	-63.174	-62.436	-64.452	-68.959	-69.019	-69.64	-69.341	-70.119
1.456	-61.668	-59.988	-63.184	-62.455	-64.436	-68.903	-69.077	-69.647	-69.37	-70.119
1.457	-61.595	-59.991	-63.184	-62.44	-64.433	-68.824	-69.084	-69.607	-69.407	-70.156
1.458	-61.62	-60.023	-63.177	-62.456	-64.449	-68.746	-69.041	-69.576	-69.478	-70.178
1.459	-61.645	-60.03	-63.181	-62.435	-64.433	-68.673	-68.995	-69.553	-69.54	-70.143
1.46	-61.616	-60.046	-63.166	-62.398	-64.448	-68.639	-69.009	-69.592	-69.585	-70.13
1.461	-61.662	-60.004	-63.157	-62.396	-64.454	-68.647	-69.018	-69.582	-69.684	-70.116
1.462	-61.657	-59.955	-63.135	-62.394	-64.48	-68.663	-69.052	-69.601	-69.745	-70.088
1.463	-61.64	-59.96	-63.126	-62.39	-64.468	-68.729	-69.044	-69.638	-69.822	-70.056
1.464	-61.677	-59.966	-63.083	-62.39	-64.469	-68.794	-69.116	-69.675	-70	-70.073
1.465	-61.684	-59.997	-63.081	-62.367	-64.523	-68.832	-69.148	-69.671	-70.054	-70.049
1.466	-61.767	-60.047	-63.119	-62.355	-64.476	-68.813	-69.141	-69.653	-70.11	-69.965
1.467	-61.795	-60.049	-63.058	-62.377	-64.47	-68.828	-69.109	-69.652	-70.121	-69.896
1.468	-61.836	-60.105	-63.054	-62.372	-64.511	-68.852	-69.097	-69.647	-70.079	-69.885
1.469	-61.817	-60.097	-63.084	-62.364	-64.554	-68.901	-69.145	-69.694	-70	-69.906
1.47	-61.806	-60.136	-63.109	-62.438	-64.614	-68.989	-69.112	-69.712	-69.896	-69.966
1.471	-61.836	-60.174	-63.112	-62.401	-64.64	-69.008	-69.073	-69.663	-69.782	-69.978
1.472	-61.735	-60.203	-63.092	-62.476	-64.669	-69.056	-69.084	-69.659	-69.731	-69.938
1.473	-61.72	-60.233	-63.073	-62.525	-64.681	-69.049	-69.07	-69.682	-69.724	-69.81
1.474	-61.729	-60.207	-63.109	-62.536	-64.686	-68.931	-69.146	-69.674	-69.775	-69.788
1.475	-61.726	-60.178	-63.115	-62.513	-64.677	-68.758	-69.269	-69.644	-69.807	-69.748
1.476	-61.775	-60.225	-63.113	-62.488	-64.679	-68.713	-69.263	-69.622	-69.733	-69.641
1.477	-61.786	-60.18	-63.189	-62.471	-64.671	-68.698	-69.215	-69.574	-69.67	-69.543
1.478	-61.755	-60.135	-63.208	-62.44	-64.629	-68.772	-69.189	-69.588	-69.644	-69.518
1.479	-61.707	-60.106	-63.267	-62.416	-64.555	-68.803	-69.193	-69.586	-69.629	-69.538
1.48	-61.688	-60.064	-63.212	-62.444	-64.505	-68.786	-69.175	-69.545	-69.617	-69.54
1.481	-61.663	-60.092	-63.125	-62.35	-64.496	-68.826	-69.159	-69.495	-69.651	-69.553
1.482	-61.655	-60.095	-63.119	-62.356	-64.467	-68.902	-69.108	-69.532	-69.75	-69.55
1.483	-61.688	-60.082	-63.187	-62.368	-64.458	-68.868	-69.086	-69.589	-69.827	-69.442
1.484	-61.723	-60.075	-63.18	-62.345	-64.348	-68.949	-69.061	-69.532	-69.845	-69.442
1.485	-61.679	-60.08	-63.194	-62.374	-64.274	-68.986	-69.033	-69.513	-69.848	-69.491
1.486	-61.64	-60.091	-63.175	-62.413	-64.28	-68.994	-68.99	-69.507	-69.85	-69.475
1.487	-61.657	-60.109	-63.179	-62.453	-64.305	-68.982	-68.945	-69.519	-69.885	-69.437
1.488	-61.631	-60.087	-63.207	-62.449	-64.345	-68.965	-68.938	-69.563	-69.791	-69.342
1.489	-61.651	-60.132	-63.174	-62.463	-64.401	-68.963	-68.943	-69.627	-69.758	-69.255
1.49	-61.682	-60.158	-63.242	-62.454	-64.309	-69.032	-68.934	-69.611	-69.796	-69.229
1.491	-61.729	-60.157	-63.264	-62.469	-64.222	-69.063	-68.922	-69.606	-69.792	-69.174
1.492	-61.73	-60.224	-63.251	-62.509	-64.204	-69.116	-69.023	-69.673	-69.792	-69.17
1.493	-61.75	-60.301	-63.245	-62.569	-64.205	-69.126	-69.142	-69.75	-69.839	-69.193
1.494	-61.785	-60.273	-63.282	-62.548	-64.234	-69.081	-69.215	-69.802	-69.911	-69.228
1.495	-61.822	-60.258	-63.235	-62.52	-64.28	-69.11	-69.208	-69.773	-69.949	-69.255
1.496	-61.817	-60.243	-63.212	-62.507	-64.285	-69.13	-69.196	-69.772	-69.961	-69.257
1.497	-61.816	-60.255	-63.209	-62.518	-64.306	-69.145	-69.222	-69.809	-69.991	-69.258
1.498	-61.89	-60.278	-63.202	-62.495	-64.346	-69.088	-69.236	-69.75	-69.997	-69.253
1.499	-61.955	-60.313	-63.169	-62.488	-64.339	-69.072	-69.177	-69.743	-69.996	-69.313

## Sheet: Fig2C
-0.2	-64.717	0.27584	-65.24	0.50846	-64.115	0.506
-0.1998	-64.709	0.27462	-65.226	0.50125	-64.119	0.48084
-0.1996	-64.7	0.26938	-65.265	0.4929	-64.134	0.48919
-0.1994	-64.699	0.27146	-65.252	0.49745	-64.124	0.4952
-0.1992	-64.68	0.27152	-65.265	0.48902	-64.124	0.49318
-0.199	-64.63	0.26966	-65.292	0.50269	-64.118	0.49926
-0.1988	-64.606	0.27088	-65.283	0.50401	-64.117	0.50188
-0.19861	-64.598	0.2704	-65.3	0.50157	-64.125	0.5204
-0.19841	-64.581	0.26591	-65.301	0.5138	-64.132	0.53533
-0.19821	-64.577	0.26441	-65.301	0.52942	-64.14	0.54312
-0.19801	-64.571	0.26356	-65.286	0.54471	-64.148	0.55268
-0.19781	-64.571	0.26297	-65.229	0.60411	-64.158	0.55368
-0.19761	-64.581	0.2657	-65.277	0.60598	-64.158	0.55778
-0.19741	-64.583	0.26613	-65.226	0.61428	-64.168	0.55494
-0.19721	-64.59	0.27132	-65.226	0.62727	-64.17	0.55601
-0.19701	-64.587	0.27759	-65.223	0.62913	-64.172	0.56073
-0.19681	-64.577	0.28279	-65.159	0.63847	-64.17	0.55793
-0.19661	-64.569	0.2961	-65.188	0.64156	-64.172	0.54689
-0.19641	-64.564	0.30968	-65.179	0.64123	-64.175	0.58572
-0.19621	-64.558	0.32111	-65.135	0.64457	-64.185	0.75163
-0.19601	-64.545	0.32409	-65.205	0.66552	-64.183	0.75274
-0.19582	-64.522	0.3327	-65.165	0.65936	-64.191	0.755
-0.19562	-64.514	0.33638	-65.226	0.67445	-64.197	0.76038
-0.19542	-64.499	0.3565	-65.236	0.65728	-64.189	0.74846
-0.19522	-64.459	0.37313	-65.234	0.65304	-64.192	0.74277
-0.19502	-64.395	0.38061	-65.234	0.64931	-64.181	0.74621
-0.19482	-64.337	0.40887	-65.245	0.63651	-64.181	0.72035
-0.19462	-64.116	0.43048	-65.236	0.61617	-64.174	0.68727
-0.19442	-63.957	0.44129	-65.243	0.61849	-64.174	0.65182
-0.19422	-63.838	0.45791	-65.245	0.60218	-64.168	0.61136
-0.19402	-63.834	0.46722	-65.231	0.61718	-64.191	0.61384
-0.19382	-63.834	0.47627	-65.239	0.63693	-64.196	0.61181
-0.19362	-63.834	0.47739	-65.243	0.63846	-64.202	0.59868
-0.19342	-63.809	0.47945	-65.225	0.65038	-64.196	0.6049
-0.19322	-63.803	0.48054	-65.219	0.65407	-64.184	0.60157
-0.19303	-63.809	0.48514	-65.194	0.65095	-64.184	0.58629
-0.19283	-63.832	0.48667	-65.19	0.64595	-64.173	0.5801
-0.19263	-63.861	0.48427	-65.187	0.64269	-64.184	0.55985
-0.19243	-63.887	0.47879	-65.135	0.65905	-64.179	0.56089
-0.19223	-63.905	0.46826	-65.138	0.66838	-64.179	0.56206
-0.19203	-63.93	0.45615	-65.141	0.66173	-64.185	0.56526
-0.19183	-63.943	0.4427	-65.118	0.67511	-64.18	0.56887
-0.19163	-63.962	0.43533	-65.135	0.67921	-64.18	0.57548
-0.19143	-63.998	0.42953	-65.129	0.68151	-64.18	0.57618
-0.19123	-64.044	0.42864	-65.068	0.68024	-64.18	0.57557
-0.19103	-64.07	0.42168	-65.109	0.69076	-64.18	0.57875
-0.19083	-64.125	0.41819	-65.097	0.68802	-64.198	0.59417
-0.19063	-64.137	0.41489	-65.081	0.70006	-64.196	0.5847
-0.19043	-64.157	0.412	-65.127	0.6961	-64.198	0.5861
-0.19024	-64.163	0.40739	-65.097	0.6856	-64.209	0.59357
-0.19004	-64.163	0.40317	-65.109	0.69567	-64.217	0.59624
-0.18984	-64.163	0.3968	-65.164	0.68195	-64.217	0.58363
-0.18964	-64.163	0.38938	-65.097	0.69065	-64.247	0.57144
-0.18944	-64.149	0.38591	-65.13	0.69961	-64.266	0.57733
-0.18924	-64.137	0.37741	-65.164	0.68342	-64.268	0.57685
-0.18904	-64.09	0.37278	-65.164	0.70595	-64.28	0.57064
-0.18884	-64.037	0.36444	-65.2	0.71743	-64.28	0.56846
-0.18864	-63.94	0.35714	-65.2	0.7218	-64.287	0.56015
-0.18844	-63.921	0.35666	-65.187	0.73232	-64.28	0.56478
-0.18824	-63.913	0.37195	-65.193	0.73251	-64.28	0.56448
-0.18804	-63.901	0.36808	-65.167	0.73406	-64.291	0.55725
-0.18784	-63.867	0.36969	-65.162	0.74447	-64.308	0.54945
-0.18765	-63.856	0.36941	-65.188	0.74285	-64.308	0.55441
-0.18745	-63.849	0.37018	-65.159	0.74712	-64.309	0.53256
-0.18725	-63.852	0.36779	-65.188	0.77502	-64.309	0.50861
-0.18705	-63.852	0.37027	-65.194	0.76628	-64.301	0.48464
-0.18685	-63.873	0.36948	-65.162	0.78476	-64.306	0.46361
-0.18665	-63.875	0.37114	-65.158	0.80024	-64.316	0.44616
-0.18645	-63.873	0.37132	-65.124	0.79995	-64.319	0.42579
-0.18625	-63.866	0.36721	-65.124	0.80948	-64.316	0.41239
-0.18605	-63.855	0.36727	-65.162	0.81783	-64.319	0.39999
-0.18585	-63.846	0.36721	-65.162	0.82442	-64.328	0.37537
-0.18565	-63.85	0.36838	-65.181	0.84593	-64.329	0.36827
-0.18545	-63.863	0.36607	-65.19	0.8646	-64.342	0.36104
-0.18525	-63.87	0.36528	-65.184	0.89635	-64.338	0.35116
-0.18505	-63.905	0.36774	-65.196	0.91534	-64.345	0.35169
-0.18486	-63.911	0.37094	-65.187	0.91208	-64.346	0.34477
-0.18466	-63.911	0.37393	-65.171	0.93063	-64.364	0.34753
-0.18446	-63.898	0.37494	-65.184	0.94845	-64.373	0.33093
-0.18426	-63.911	0.37636	-65.184	0.93885	-64.379	0.32139
-0.18406	-63.933	0.37822	-65.19	0.97517	-64.392	0.34679
-0.18386	-63.957	0.39213	-65.205	0.9849	-64.374	0.35496
-0.18366	-63.975	0.39699	-65.181	0.99259	-64.374	0.34992
-0.18346	-63.982	0.39952	-65.168	0.99025	-64.285	0.35869
-0.18326	-63.992	0.39916	-65.188	0.98885	-64.229	0.36093
-0.18306	-64.008	0.40007	-65.168	0.98095	-64.229	0.36695
-0.18286	-64.008	0.40036	-65.168	0.98664	-64.229	0.3834
-0.18266	-64.009	0.3977	-65.174	0.97584	-64.225	0.40452
-0.18246	-64.009	0.3961	-65.098	0.96118	-64.215	0.41611
-0.18226	-64.011	0.39178	-65.098	0.97818	-64.229	0.41595
-0.18207	-64.021	0.38615	-65.123	0.9672	-64.229	0.41596
-0.18187	-64.018	0.38457	-65.039	0.97439	-64.211	0.41544
-0.18167	-64.023	0.3803	-65.146	0.96057	-64.189	0.3804
-0.18147	-64.026	0.37971	-65.063	0.94586	-64.089	0.36004
-0.18127	-64.02	0.38688	-65.022	0.95087	-64.038	0.30287
-0.18107	-64.008	0.39075	-65.039	0.93463	-64.027	0.31078
-0.18087	-64.006	0.38931	-65.004	0.92528	-63.986	0.29411
-0.18067	-64.004	0.38855	-64.972	0.93258	-63.962	0.2901
-0.18047	-64.004	0.3947	-64.994	0.91928	-63.926	0.29882
-0.18027	-64.004	0.40467	-64.953	0.9211	-63.901	0.32769
-0.18007	-63.994	0.41082	-64.978	0.92152	-63.875	0.37446
-0.17987	-63.986	0.41248	-64.978	0.90149	-63.858	0.39766
-0.17967	-63.956	0.41605	-64.933	0.89279	-63.85	0.39986
-0.17947	-63.951	0.4179	-64.938	0.89786	-63.842	0.40922
-0.17928	-63.946	0.42319	-64.901	0.86873	-63.858	0.42383
-0.17908	-63.933	0.42532	-64.859	0.88773	-63.886	0.43033
-0.17888	-63.93	0.42439	-64.915	0.89604	-63.902	0.43648
-0.17868	-63.931	0.42465	-64.878	0.88609	-63.953	0.43731
-0.17848	-63.933	0.42466	-64.878	0.90009	-63.969	0.43412
-0.17828	-63.94	0.42469	-64.938	0.88833	-63.99	0.43244
-0.17808	-63.94	0.42547	-64.878	0.88628	-64.014	0.4302
-0.17788	-63.933	0.42503	-64.923	0.88428	-64.101	0.41589
-0.17768	-63.933	0.42544	-64.935	0.86232	-64.073	0.39386
-0.17748	-63.948	0.42564	-64.888	0.83572	-64.06	0.39177
-0.17728	-63.968	0.42501	-64.924	0.85177	-64.131	0.41719
-0.17708	-63.977	0.42267	-64.94	0.81749	-64.174	0.4256
-0.17688	-63.986	0.41997	-64.944	0.81735	-64.195	0.42259
-0.17669	-64.012	0.41239	-64.973	0.82277	-64.197	0.4225
-0.17649	-64.044	0.40908	-64.973	0.78561	-64.198	0.44241
-0.17629	-64.044	0.40541	-64.953	0.80508	-64.202	0.43788
-0.17609	-64.044	0.39815	-64.953	0.79905	-64.202	0.44583
-0.17589	-64.012	0.39793	-64.93	0.78371	-64.202	0.47929
-0.17569	-64.004	0.39109	-64.914	0.79113	-64.191	0.49541
-0.17549	-64.004	0.38836	-64.949	0.80195	-64.19	0.52421
-0.17529	-64.004	0.3874	-64.901	0.81387	-64.187	0.56029
-0.17509	-63.966	0.39097	-64.903	0.82259	-64.18	0.57109
-0.17489	-63.954	0.39156	-64.914	0.8185	-64.18	0.57719
-0.17469	-63.919	0.3961	-64.897	0.82703	-64.176	0.5694
-0.17449	-63.91	0.40129	-64.907	0.85513	-64.181	0.57757
-0.17429	-63.924	0.40435	-64.901	0.85174	-64.164	0.58372
-0.17409	-63.931	0.40772	-64.875	0.8691	-64.167	0.58654
-0.1739	-63.937	0.41077	-64.907	0.89376	-64.172	0.61007
-0.1737	-63.948	0.41143	-64.909	0.89061	-64.167	0.6395
-0.1735	-63.948	0.41608	-64.909	0.90372	-64.167	0.65731
-0.1733	-63.937	0.41906	-64.947	0.89766	-64.181	0.67516
-0.1731	-63.933	0.42097	-64.947	0.90944	-64.181	0.67501
-0.1729	-63.922	0.42261	-64.972	0.91015	-64.18	0.66745
-0.1727	-63.907	0.42475	-64.979	0.89027	-64.186	0.6634
-0.1725	-63.896	0.42482	-64.947	0.89368	-64.172	0.66787
-0.1723	-63.893	0.43086	-64.965	0.89268	-64.167	0.67324
-0.1721	-63.895	0.43415	-64.975	0.88433	-64.167	0.67556
-0.1719	-63.896	0.43576	-64.973	0.87285	-64.172	0.67143
-0.1717	-63.895	0.43708	-64.979	0.84888	-64.194	0.66308
-0.1715	-63.89	0.43712	-64.978	0.8623	-64.178	0.65849
-0.1713	-63.89	0.43659	-64.979	0.83343	-64.172	0.65932
-0.17111	-63.893	0.43513	-65.028	0.83623	-64.184	0.64043
-0.17091	-63.916	0.431	-65.033	0.83965	-64.184	0.63318
-0.17071	-63.956	0.42614	-65.037	0.82629	-64.164	0.63249
-0.17051	-63.969	0.42478	-65.04	0.81575	-64.164	0.62824
-0.17031	-64.012	0.41628	-65.037	0.80392	-64.169	0.63625
-0.17011	-64.059	0.40477	-65.046	0.79107	-64.173	0.62292
-0.16991	-64.076	0.37711	-65.088	0.76525	-64.178	0.6165
-0.16971	-64.096	0.36615	-65.097	0.76053	-64.183	0.60392
-0.16951	-64.142	0.35907	-65.109	0.7422	-64.196	0.60487
-0.16931	-64.156	0.32639	-65.109	0.74216	-64.196	0.60146
-0.16911	-64.16	0.33659	-65.109	0.71921	-64.219	0.58499
-0.16891	-64.166	0.33494	-65.124	0.69742	-64.224	0.57394
-0.16871	-64.188	0.33271	-65.109	0.67527	-64.237	0.57289
-0.16851	-64.188	0.33272	-65.081	0.67989	-64.237	0.57635
-0.16832	-64.212	0.33117	-65.065	0.66733	-64.246	0.57184
-0.16812	-64.22	0.32704	-65.013	0.65088	-64.255	0.57172
-0.16792	-64.261	0.32774	-65.013	0.65569	-64.247	0.57401
-0.16772	-64.299	0.32383	-65.013	0.64426	-64.247	0.59382
-0.16752	-64.317	0.3262	-64.979	0.64979	-64.247	0.60105
-0.16732	-64.346	0.32606	-65.013	0.63544	-64.247	0.60797
-0.16712	-64.386	0.33057	-64.985	0.64059	-64.247	0.60437
-0.16692	-64.439	0.33579	-64.958	0.63794	-64.251	0.55881
-0.16672	-64.47	0.33762	-64.985	0.65216	-64.245	0.54164
-0.16652	-64.511	0.3419	-64.953	0.65258	-64.244	0.52501
-0.16632	-64.549	0.34683	-64.941	0.66119	-64.244	0.51668
-0.16612	-64.563	0.35781	-64.979	0.66203	-64.235	0.50863
-0.16592	-64.584	0.36336	-64.953	0.66437	-64.23	0.48503
-0.16573	-64.616	0.3644	-64.994	0.66127	-64.23	0.48449
-0.16553	-64.622	0.3666	-65.01	0.66364	-64.23	0.4427
-0.16533	-64.618	0.36847	-64.991	0.68412	-64.215	0.4001
-0.16513	-64.621	0.37511	-64.964	0.69926	-64.213	0.36755
-0.16493	-64.63	0.37531	-64.943	0.70038	-64.215	0.35519
-0.16473	-64.636	0.3759	-64.949	0.68914	-64.215	0.34683
-0.16453	-64.639	0.37669	-64.929	0.6802	-64.222	0.34359
-0.16433	-64.639	0.3753	-64.923	0.68499	-64.215	0.32599
-0.16413	-64.645	0.37037	-64.923	0.68827	-64.196	0.31921
-0.16393	-64.647	0.36838	-64.917	0.70495	-64.185	0.30792
-0.16373	-64.65	0.36631	-64.917	0.67102	-64.124	0.28864
-0.16353	-64.676	0.36613	-64.918	0.68858	-64.058	0.26015
-0.16333	-64.693	0.37161	-64.914	0.68842	-64.015	0.22412
-0.16313	-64.693	0.36756	-64.935	0.66635	-63.944	0.23581
-0.16294	-64.699	0.37081	-64.917	0.67394	-63.893	0.28637
-0.16274	-64.714	0.37963	-64.912	0.64915	-63.855	0.31387
-0.16254	-64.714	0.38754	-64.917	0.61828	-63.854	0.33604
-0.16234	-64.731	0.39516	-64.912	0.63477	-63.846	0.3607
-0.16214	-64.74	0.40993	-64.912	0.62948	-63.846	0.38814
-0.16194	-64.741	0.42228	-64.912	0.62853	-63.846	0.41745
-0.16174	-64.752	0.44516	-64.914	0.63783	-63.857	0.42919
-0.16154	-64.741	0.45835	-64.927	0.62706	-63.863	0.43691
-0.16134	-64.731	0.48449	-64.929	0.639	-63.897	0.43073
-0.16114	-64.691	0.48529	-64.94	0.64749	-63.955	0.42525
-0.16094	-64.597	0.49008	-64.918	0.65033	-64.031	0.41821
-0.16074	-64.589	0.4885	-64.94	0.67013	-64.075	0.41676
-0.16054	-64.572	0.48649	-64.94	0.66658	-64.075	0.38434
-0.16034	-64.563	0.4815	-64.972	0.65453	-64.092	0.36184
-0.16015	-64.554	0.47439	-64.987	0.65745	-64.12	0.32895
-0.15995	-64.545	0.44499	-64.996	0.65347	-64.152	0.30215
-0.15975	-64.548	0.42795	-65.022	0.65129	-64.197	0.28472
-0.15955	-64.548	0.41137	-65.051	0.6622	-64.222	0.26818
-0.15935	-64.555	0.40265	-65.06	0.64812	-64.235	0.25659
-0.15915	-64.557	0.39449	-65.069	0.65542	-64.262	0.24664
-0.15895	-64.568	0.38587	-65.084	0.65275	-64.25	0.22445
-0.15875	-64.589	0.388	-65.089	0.63592	-64.266	0.20169
-0.15855	-64.624	0.38605	-65.113	0.64399	-64.283	0.19113
-0.15835	-64.638	0.38923	-65.098	0.6361	-64.292	0.19448
-0.15815	-64.679	0.40634	-65.115	0.63135	-64.292	0.19597
-0.15795	-64.687	0.41309	-65.092	0.63537	-64.301	0.19459
-0.15775	-64.687	0.41775	-65.071	0.64335	-64.3	0.21549
-0.15755	-64.687	0.42052	-65.132	0.62446	-64.292	0.23098
-0.15736	-64.687	0.41771	-65.115	0.62996	-64.257	0.2075
-0.15716	-64.687	0.4207	-65.107	0.60518	-64.256	0.20355
-0.15696	-64.679	0.42112	-65.132	0.59743	-64.233	0.2162
-0.15676	-64.597	0.42018	-65.077	0.58319	-64.22	0.21335
-0.15656	-64.564	0.41786	-65.1	0.5784	-64.203	0.26022
-0.15636	-64.488	0.4134	-65.1	0.58159	-64.173	0.27097
-0.15616	-64.429	0.40685	-65.049	0.54859	-64.159	0.27628
-0.15596	-64.465	0.40387	-65.074	0.54248	-64.15	0.27222
-0.15576	-64.502	0.39856	-65.074	0.53592	-64.12	0.26879
-0.15556	-64.51	0.39356	-65.052	0.52641	-64.09	0.27097
-0.15536	-64.532	0.385	-65.089	0.52213	-64.087	0.26962
-0.15516	-64.542	0.38028	-65.052	0.51946	-64.087	0.26523
-0.15496	-64.557	0.37406	-65.052	0.50292	-64.074	0.26199
-0.15477	-64.584	0.37354	-65.089	0.50441	-64.051	0.25891
-0.15457	-64.613	0.37575	-65.071	0.50524	-64.023	0.24554
-0.15437	-64.639	0.37403	-65.075	0.49977	-63.995	0.24028
-0.15417	-64.639	0.37078	-65.118	0.49929	-63.995	0.23169
-0.15397	-64.633	0.36698	-65.094	0.49255	-63.981	0.21643
-0.15377	-64.616	0.36041	-65.124	0.48513	-63.985	0.20481
-0.15357	-64.616	0.35874	-65.133	0.47686	-63.969	0.20441
-0.15337	-64.612	0.35677	-65.123	0.47078	-63.952	0.20672
-0.15317	-64.598	0.35222	-65.101	0.47098	-63.944	0.20258
-0.15297	-64.569	0.34707	-65.101	0.46303	-63.938	0.20239
-0.15277	-64.502	0.34014	-65.097	0.44296	-63.958	0.1924
-0.15257	-64.503	0.339	-65.078	0.44037	-63.982	0.19527
-0.15237	-64.514	0.34743	-65.097	0.43209	-64.02	0.20983
-0.15217	-64.531	0.34406	-65.092	0.41486	-64.035	0.23742
-0.15198	-64.551	0.34229	-65.089	0.41202	-64.046	0.25786
-0.15178	-64.561	0.34155	-65.097	0.39235	-64.06	0.2971
-0.15158	-64.561	0.34744	-65.075	0.36534	-64.096	0.36756
-0.15138	-64.554	0.34973	-65.094	0.35998	-64.11	0.40435
-0.15118	-64.542	0.361	-65.132	0.31107	-64.119	0.43142
-0.15098	-64.522	0.385	-65.138	0.30822	-64.134	0.46763
-0.15078	-64.496	0.39439	-65.176	0.29769	-64.148	0.49205
-0.15058	-64.449	0.40578	-65.197	0.28061	-64.156	0.50683
-0.15038	-64.391	0.41466	-65.193	0.27822	-64.207	0.52962
-0.15018	-64.381	0.41813	-65.22	0.27054	-64.23	0.55337
-0.14998	-64.365	0.42236	-65.246	0.27251	-64.284	0.56141
-0.14978	-64.348	0.42915	-65.252	0.27365	-64.34	0.57044
-0.14958	-64.348	0.43131	-65.289	0.27539	-64.362	0.5821
-0.14938	-64.339	0.43379	-65.274	0.2643	-64.408	0.58792
-0.14919	-64.291	0.43506	-65.29	0.27706	-64.419	0.58757
-0.14899	-64.291	0.44318	-65.29	0.2753	-64.444	0.59904
-0.14879	-64.339	0.44303	-65.301	0.26311	-64.456	0.62118
-0.14859	-64.342	0.44599	-65.292	0.26452	-64.474	0.64354
-0.14839	-64.355	0.4536	-65.281	0.25895	-64.478	0.6688
-0.14819	-64.371	0.45668	-65.292	0.23726	-64.486	0.68921
-0.14799	-64.397	0.4565	-65.281	0.24983	-64.505	0.71258
-0.14779	-64.412	0.45629	-65.265	0.22921	-64.505	0.74564
-0.14759	-64.416	0.45685	-65.242	0.23839	-64.499	0.78425
-0.14739	-64.426	0.45667	-65.196	0.23982	-64.505	0.82385
-0.14719	-64.436	0.45603	-65.194	0.22228	-64.505	0.86305
-0.14699	-64.436	0.4547	-65.185	0.23109	-64.508	0.88457
-0.14679	-64.462	0.452	-65.161	0.2187	-64.527	0.90683
-0.14659	-64.49	0.44906	-65.165	0.22354	-64.527	0.90815
-0.1464	-64.496	0.44804	-65.156	0.22476	-64.521	0.90713
-0.1462	-64.497	0.44397	-65.153	0.24168	-64.521	0.91336
-0.146	-64.497	0.44661	-65.159	0.24904	-64.508	0.91009
-0.1458	-64.497	0.44522	-65.146	0.28037	-64.513	0.9023
-0.1456	-64.497	0.44476	-65.138	0.29418	-64.527	0.89332
-0.1454	-64.482	0.44355	-65.165	0.29919	-64.517	0.86868
-0.1452	-64.45	0.44572	-65.147	0.30772	-64.517	0.8408
-0.145	-64.42	0.44748	-65.156	0.30893	-64.523	0.81619
-0.1448	-64.383	0.44712	-65.184	0.31909	-64.53	0.80849
-0.1446	-64.346	0.44766	-65.171	0.32497	-64.533	0.80724
-0.1444	-64.328	0.45835	-65.226	0.32257	-64.532	0.80812
-0.1442	-64.272	0.46182	-65.219	0.33497	-64.526	0.79812
-0.144	-64.255	0.45889	-65.214	0.33197	-64.538	0.80241
-0.14381	-64.241	0.45664	-65.214	0.32383	-64.558	0.83047
-0.14361	-64.239	0.45397	-65.191	0.33657	-64.569	0.84084
-0.14341	-64.236	0.45188	-65.171	0.32415	-64.574	0.8721
-0.14321	-64.233	0.45632	-65.196	0.29864	-64.577	0.88423
-0.14301	-64.233	0.45926	-65.213	0.3012	-64.588	0.89579
-0.14281	-64.236	0.4634	-65.181	0.29089	-64.606	0.90329
-0.14261	-64.243	0.46311	-65.216	0.26102	-64.594	0.89914
-0.14241	-64.256	0.46419	-65.216	0.25183	-64.606	0.90862
-0.14221	-64.287	0.46473	-65.181	0.2116	-64.606	0.91338
-0.14201	-64.333	0.46387	-65.196	0.18634	-64.617	0.88688
-0.14181	-64.348	0.46318	-65.202	0.15049	-64.632	0.87447
-0.14161	-64.374	0.46347	-65.188	0.11699	-64.652	0.84899
-0.14141	-64.392	0.46225	-65.213	0.10718	-64.673	0.83895
-0.14121	-64.4	0.45971	-65.197	0.097909	-64.684	0.83715
-0.14102	-64.41	0.45798	-65.19	0.10253	-64.689	0.82702
-0.14082	-64.42	0.45337	-65.213	0.10674	-64.71	0.82904
-0.14062	-64.42	0.44884	-65.188	0.10562	-64.71	0.83176
-0.14042	-64.432	0.44593	-65.184	0.10604	-64.717	0.83162
-0.14022	-64.433	0.43901	-65.176	0.14201	-64.712	0.81503
-0.14002	-64.441	0.43155	-65.156	0.12694	-64.712	0.81592
-0.13982	-64.444	0.42543	-65.176	0.13463	-64.712	0.82308
-0.13962	-64.452	0.41664	-65.173	0.15508	-64.717	0.82718
-0.13942	-64.459	0.4055	-65.156	0.15782	-64.717	0.8581
-0.13922	-64.511	0.40277	-65.181	0.17787	-64.706	0.88587
-0.13902	-64.532	0.39824	-65.156	0.2102	-64.692	0.88638
-0.13882	-64.548	0.39992	-65.185	0.2199	-64.69	0.88401
-0.13862	-64.555	0.41272	-65.161	0.242	-64.682	0.8824
-0.13842	-64.571	0.42246	-65.149	0.24804	-64.682	0.87138
-0.13823	-64.589	0.4267	-65.152	0.25462	-64.674	0.86564
-0.13803	-64.604	0.43354	-65.13	0.2959	-64.674	0.86599
-0.13783	-64.618	0.44184	-65.133	0.30724	-64.695	0.85342
-0.13763	-64.618	0.44432	-65.176	0.313	-64.709	0.84219
-0.13743	-64.6	0.44617	-65.159	0.32597	-64.712	0.83127
-0.13723	-64.6	0.44622	-65.141	0.3224	-64.712	0.82317
-0.13703	-64.598	0.44183	-65.126	0.34135	-64.707	0.82051
-0.13683	-64.586	0.4416	-65.141	0.353	-64.699	0.81912
-0.13663	-64.568	0.44033	-65.138	0.34152	-64.705	0.80475
-0.13643	-64.554	0.44051	-65.132	0.37026	-64.709	0.80285
-0.13623	-64.516	0.4261	-65.138	0.37437	-64.717	0.79023
-0.13603	-64.491	0.41879	-65.138	0.36679	-64.72	0.79215
-0.13583	-64.468	0.4127	-65.197	0.3882	-64.72	0.77874
-0.13563	-64.442	0.40368	-65.205	0.39241	-64.716	0.76495
-0.13544	-64.433	0.39952	-65.171	0.39467	-64.71	0.75276
-0.13524	-64.433	0.39768	-65.197	0.4113	-64.679	0.72243
-0.13504	-64.415	0.39514	-65.173	0.40526	-64.661	0.69511
-0.13484	-64.409	0.39141	-65.17	0.41224	-64.649	0.6539
-0.13464	-64.401	0.39083	-65.182	0.42299	-64.642	0.63813
-0.13444	-64.409	0.38957	-65.203	0.40846	-64.642	0.60998
-0.13424	-64.409	0.38986	-65.225	0.41901	-64.628	0.58954
-0.13404	-64.423	0.38927	-65.26	0.43978	-64.578	0.57604
-0.13384	-64.488	0.38661	-65.239	0.4291	-64.535	0.54957
-0.13364	-64.506	0.38677	-65.249	0.4635	-64.5	0.53479
-0.13344	-64.516	0.38291	-65.26	0.45606	-64.482	0.51401
-0.13324	-64.531	0.38	-65.255	0.4529	-64.472	0.5102
-0.13304	-64.54	0.37629	-65.271	0.47224	-64.46	0.51926
-0.13285	-64.543	0.37346	-65.272	0.48849	-64.443	0.52448
-0.13265	-64.546	0.37145	-65.272	0.48623	-64.438	0.51881
-0.13245	-64.564	0.36949	-65.286	0.51709	-64.413	0.51382
-0.13225	-64.574	0.36795	-65.28	0.5121	-64.395	0.51703
-0.13205	-64.575	0.36448	-65.28	0.5122	-64.395	0.52534
-0.13185	-64.575	0.35893	-65.297	0.52769	-64.392	0.52754
-0.13165	-64.574	0.3525	-65.29	0.51636	-64.38	0.53662
-0.13145	-64.568	0.34411	-65.297	0.53171	-64.388	0.53094
-0.13125	-64.575	0.33566	-65.332	0.52984	-64.383	0.5119
-0.13105	-64.575	0.32776	-65.3	0.54604	-64.383	0.51393
-0.13085	-64.577	0.32078	-65.3	0.57179	-64.373	0.50899
-0.13065	-64.58	0.31304	-65.321	0.58636	-64.381	0.4987
-0.13045	-64.564	0.30669	-65.301	0.58859	-64.417	0.49405
-0.13025	-64.5	0.29453	-65.301	0.61081	-64.435	0.49221
-0.13006	-64.447	0.28815	-65.252	0.61	-64.454	0.5118
-0.12986	-64.406	0.28498	-65.252	0.61093	-64.449	0.52256
-0.12966	-64.378	0.28649	-65.29	0.62226	-64.405	0.5236
-0.12946	-64.378	0.28361	-65.252	0.62277	-64.351	0.54151
-0.12926	-64.368	0.29005	-65.287	0.63252	-64.317	0.56404
-0.12906	-64.354	0.29409	-65.289	0.64998	-64.289	0.57983
-0.12886	-64.339	0.31606	-65.249	0.65487	-64.256	0.60846
-0.12866	-64.325	0.31209	-65.289	0.66805	-64.252	0.62817
-0.12846	-64.287	0.31043	-65.271	0.66815	-64.252	0.62687
-0.12826	-64.188	0.30488	-65.229	0.67389	-64.261	0.63172
-0.12806	-64.116	0.30458	-65.29	0.67629	-64.252	0.64786
-0.12786	-64.061	0.30721	-65.278	0.66494	-64.241	0.64534
-0.12766	-64.059	0.307	-65.232	0.64416	-64.244	0.63134
-0.12746	-64.087	0.30444	-65.243	0.65706	-64.241	0.63867
-0.12727	-64.105	0.302	-65.226	0.6529	-64.239	0.62959
-0.12707	-64.113	0.31327	-65.226	0.64904	-64.224	0.62599
-0.12687	-64.111	0.31899	-65.243	0.65347	-64.224	0.62144
-0.12667	-64.116	0.32934	-65.24	0.63783	-64.22	0.61686
-0.12647	-64.107	0.34001	-65.248	0.63791	-64.212	0.61747
-0.12627	-64.111	0.33961	-65.248	0.63733	-64.207	0.59368
-0.12607	-64.139	0.33921	-65.223	0.63165	-64.201	0.58885
-0.12587	-64.139	0.34283	-65.22	0.63293	-64.189	0.59732
-0.12567	-64.145	0.34381	-65.185	0.632	-64.106	0.57095
-0.12547	-64.156	0.34589	-65.167	0.63544	-64.009	0.55127
-0.12527	-64.166	0.3432	-65.185	0.64729	-64.001	0.54866
-0.12507	-64.166	0.33459	-65.152	0.65615	-63.976	0.56234
-0.12487	-64.156	0.33312	-65.205	0.66565	-63.963	0.54762
-0.12467	-64.128	0.32488	-65.222	0.65878	-63.958	0.4599
-0.12448	-64.128	0.31815	-65.237	0.652	-63.958	0.45883
-0.12428	-64.128	0.30941	-65.237	0.64991	-63.958	0.46617
-0.12408	-64.125	0.30134	-65.197	0.65812	-63.953	0.4825
-0.12388	-64.122	0.29809	-65.24	0.63998	-63.946	0.49563
-0.12368	-64.133	0.29151	-65.24	0.6101	-63.958	0.50797
-0.12348	-64.142	0.27871	-65.237	0.58893	-63.962	0.52641
-0.12328	-64.172	0.26918	-65.242	0.55801	-63.962	0.54089
-0.12308	-64.181	0.26244	-65.223	0.55689	-63.968	0.5565
-0.12288	-64.194	0.25542	-65.237	0.53197	-63.988	0.59443
-0.12268	-64.198	0.25349	-65.242	0.51582	-63.98	0.62012
-0.12248	-64.203	0.24365	-65.226	0.50276	-63.977	0.63583
-0.12228	-64.21	0.22738	-65.24	0.48699	-63.98	0.65465
-0.12208	-64.207	0.22487	-65.243	0.48182	-63.977	0.67863
-0.12189	-64.203	0.22509	-65.231	0.47753	-63.964	0.69413
-0.12169	-64.207	0.22713	-65.237	0.46155	-63.963	0.70529
-0.12149	-64.215	0.23349	-65.22	0.4736	-63.963	0.7231
-0.12129	-64.201	0.24198	-65.214	0.46747	-63.955	0.74115
-0.12109	-64.256	0.25286	-65.22	0.46031	-63.951	0.74468
-0.12089	-64.261	0.26987	-65.211	0.46067	-63.929	0.74005
-0.12069	-64.27	0.28941	-65.217	0.45273	-63.926	0.79139
-0.12049	-64.275	0.31411	-65.217	0.45557	-63.924	0.79965
-0.12029	-64.284	0.33067	-65.199	0.43452	-63.924	0.81095
-0.12009	-64.278	0.33927	-65.211	0.44168	-63.909	0.81343
-0.11989	-64.275	0.34739	-65.21	0.44557	-63.897	0.8217
-0.11969	-64.273	0.35953	-65.185	0.44853	-63.89	0.83181
-0.11949	-64.265	0.38357	-65.191	0.44632	-63.89	0.83676
-0.11929	-64.255	0.40691	-65.152	0.44727	-63.897	0.82852
-0.1191	-64.247	0.42282	-65.059	0.45688	-63.89	0.8358
-0.1189	-64.253	0.44857	-65.007	0.45926	-63.89	0.83098
-0.1187	-64.243	0.45846	-65.01	0.47143	-63.879	0.81808
-0.1185	-64.214	0.46829	-64.965	0.46994	-63.871	0.80569
-0.1183	-64.197	0.47304	-64.946	0.4923	-63.871	0.78067
-0.1181	-64.107	0.47431	-64.929	0.50644	-63.855	0.7268
-0.1179	-64.078	0.47433	-64.927	0.51564	-63.831	0.68317
-0.1177	-64.052	0.47265	-64.927	0.51867	-63.777	0.66267
-0.1175	-64.032	0.47109	-64.979	0.51637	-63.814	0.64438
-0.1173	-64.032	0.47001	-64.927	0.53005	-63.827	0.64387
-0.1171	-64.001	0.46437	-64.927	0.54337	-63.836	0.7111
-0.1169	-63.992	0.4574	-64.943	0.54901	-63.84	0.70308
-0.1167	-63.991	0.45096	-64.885	0.56204	-63.838	0.67734
-0.1165	-63.965	0.43638	-64.904	0.57331	-63.836	0.67424
-0.11631	-63.96	0.43329	-64.953	0.58617	-63.836	0.68337
-0.11611	-63.965	0.42701	-64.914	0.59192	-63.833	0.68582
-0.11591	-63.965	0.42197	-64.969	0.57866	-63.815	0.68677
-0.11571	-63.957	0.41822	-64.97	0.57226	-63.844	0.69074
-0.11551	-63.953	0.41281	-64.97	0.57081	-63.903	0.68225
-0.11531	-63.942	0.40688	-64.988	0.55174	-63.979	0.65625
-0.11511	-63.931	0.40416	-64.97	0.53796	-64.021	0.63342
-0.11491	-63.962	0.40013	-64.976	0.51707	-64.087	0.63902
-0.11471	-63.969	0.39626	-64.982	0.41722	-64.12	0.62679
-0.11451	-63.988	0.39374	-64.965	0.36088	-64.154	0.61956
-0.11431	-64.014	0.39488	-64.988	0.32129	-64.191	0.61272
-0.11411	-64.033	0.39688	-65.03	0.28497	-64.241	0.61083
-0.11391	-64.058	0.39945	-65.051	0.26742	-64.319	0.58502
-0.11371	-64.102	0.40632	-65.107	0.25227	-64.319	0.54609
-0.11352	-64.131	0.41144	-65.107	0.24933	-64.312	0.52603
-0.11332	-64.159	0.41489	-65.091	0.24306	-64.312	0.51953
-0.11312	-64.207	0.41856	-65.113	0.21313	-64.314	0.50353
-0.11292	-64.217	0.42242	-65.101	0.22662	-64.314	0.49531
-0.11272	-64.224	0.43631	-65.113	0.22135	-64.303	0.4846
-0.11252	-64.249	0.48603	-65.184	0.22605	-64.324	0.49151
-0.11232	-64.262	0.50083	-65.196	0.24222	-64.325	0.4797
-0.11212	-64.265	0.51725	-65.22	0.23885	-64.325	0.4569
-0.11192	-64.265	0.53358	-65.228	0.23767	-64.335	0.44901
-0.11172	-64.265	0.53776	-65.216	0.24661	-64.342	0.4439
-0.11152	-64.265	0.54221	-65.223	0.24268	-64.34	0.43015
-0.11132	-64.259	0.54669	-65.228	0.24802	-64.308	0.40199
-0.11112	-64.259	0.54842	-65.219	0.24446	-64.308	0.38107
-0.11093	-64.241	0.54779	-65.254	0.22047	-64.283	0.36506
-0.11073	-64.241	0.55019	-65.246	0.24834	-64.279	0.36614
-0.11053	-64.247	0.54903	-65.246	0.24596	-64.255	0.36368
-0.11033	-64.247	0.54687	-65.261	0.24395	-64.244	0.36064
-0.11013	-64.259	0.54316	-65.246	0.24446	-64.255	0.35544
-0.10993	-64.262	0.53647	-65.274	0.23162	-64.236	0.34949
-0.10973	-64.272	0.52335	-65.24	0.21915	-64.212	0.36604
-0.10953	-64.272	0.51195	-65.188	0.23259	-64.198	0.36296
-0.10933	-64.278	0.5033	-65.22	0.21707	-64.198	0.36365
-0.10913	-64.273	0.48521	-65.179	0.22197	-64.181	0.3629
-0.10893	-64.267	0.47704	-65.165	0.23842	-64.179	0.35071
-0.10873	-64.241	0.46807	-65.193	0.22488	-64.172	0.33979
-0.10853	-64.22	0.45778	-65.185	0.23769	-64.187	0.33941
-0.10833	-64.204	0.44995	-65.174	0.22903	-64.192	0.32769
-0.10814	-64.239	0.44818	-65.199	0.20307	-64.211	0.30593
-0.10794	-64.278	0.44338	-65.184	0.20558	-64.225	0.29094
-0.10774	-64.276	0.43939	-65.199	0.19577	-64.234	0.27001
-0.10754	-64.256	0.43584	-65.229	0.20083	-64.207	0.24977
-0.10734	-64.255	0.43525	-65.214	0.22188	-64.168	0.23324
-0.10714	-64.252	0.43882	-65.251	0.23655	-64.132	0.22874
-0.10694	-64.233	0.44065	-65.251	0.25285	-64.109	0.2159
-0.10674	-64.233	0.44256	-65.248	0.24197	-64.109	0.20342
-0.10654	-64.238	0.44679	-65.28	0.24502	-64.097	0.20104
-0.10634	-64.229	0.44905	-65.275	0.26325	-64.097	0.19107
-0.10614	-64.236	0.44691	-65.272	0.26353	-64.081	0.18457
-0.10594	-64.227	0.44665	-65.287	0.27138	-64.081	0.17583
-0.10574	-64.223	0.44785	-65.284	0.29043	-64.087	0.20501
-0.10554	-64.227	0.45441	-65.28	0.30564	-64.11	0.20572
-0.10535	-64.238	0.46389	-65.344	0.32238	-64.114	0.21914
-0.10515	-64.246	0.48402	-65.371	0.31912	-64.14	0.24395
-0.10495	-64.238	0.4995	-65.399	0.33082	-64.129	0.25365
-0.10475	-64.233	0.51835	-65.406	0.33451	-64.129	0.25559
-0.10455	-64.238	0.53322	-65.399	0.3364	-64.14	0.25683
-0.10435	-64.238	0.5355	-65.406	0.34352	-64.121	0.26272
-0.10415	-64.233	0.53622	-65.405	0.34031	-64.103	0.25039
-0.10395	-64.25	0.53612	-65.406	0.35148	-64.102	0.24467
-0.10375	-64.241	0.53395	-65.454	0.34636	-64.073	0.23658
-0.10355	-64.25	0.5276	-65.417	0.34542	-64.058	0.23115
-0.10335	-64.236	0.5245	-65.448	0.34745	-64.056	0.21997
-0.10315	-64.246	0.521	-65.463	0.34976	-64.04	0.19102
-0.10295	-64.256	0.5101	-65.428	0.32323	-64.03	0.17419
-0.10275	-64.259	0.50658	-65.437	0.3281	-64.03	0.12112
-0.10256	-64.262	0.50238	-65.455	0.32541	-64.03	0.08663
-0.10236	-64.272	0.4991	-65.442	0.32992	-64.024	0.084797
-0.10216	-64.282	0.48949	-65.452	0.34267	-64.03	0.087672
-0.10196	-64.317	0.48668	-65.458	0.33654	-64.034	0.086348
-0.10176	-64.319	0.48643	-65.437	0.3439	-64.058	0.07723
-0.10156	-64.317	0.48478	-65.463	0.34748	-64.024	0.071663
-0.10136	-64.319	0.48716	-65.432	0.34196	-64.008	0.094604
-0.10116	-64.319	0.48632	-65.437	0.35323	-64.013	0.12402
-0.10096	-64.319	0.48635	-65.458	0.36603	-64.02	0.15348
-0.10076	-64.317	0.48466	-65.458	0.3688	-64.035	0.19298
-0.10056	-64.299	0.48688	-65.471	0.38219	-64.037	0.23199
-0.10036	-64.284	0.48885	-65.516	0.40248	-64.042	0.26474
-0.10016	-64.279	0.48957	-65.486	0.38618	-64.045	0.31807
-0.099965	-64.314	0.48451	-65.544	0.3857	-64.057	0.33925
-0.099766	-64.314	0.48327	-65.567	0.38748	-64.086	0.38451
-0.099567	-64.326	0.4844	-65.576	0.41023	-64.089	0.41837
-0.099367	-64.337	0.48144	-65.55	0.41734	-64.089	0.43732
-0.099168	-64.351	0.48218	-65.493	0.41119	-64.076	0.4543
-0.098969	-64.38	0.48375	-65.493	0.4227	-64.053	0.45929
-0.098769	-64.394	0.48676	-65.426	0.43814	-64.053	0.46287
-0.09857	-64.41	0.50374	-65.416	0.43126	-64.038	0.46034
-0.098371	-64.445	0.51068	-65.419	0.4399	-64.038	0.46132
-0.098172	-64.471	0.51169	-65.391	0.45084	-64.038	0.4519
-0.097972	-64.514	0.51839	-65.391	0.45776	-64.056	0.44275
-0.097773	-64.526	0.51813	-65.379	0.47927	-64.038	0.42841
-0.097574	-64.526	0.51404	-65.35	0.49676	-64.079	0.43287
-0.097375	-64.526	0.50997	-65.379	0.491	-64.08	0.43103
-0.097175	-64.526	0.50304	-65.367	0.48943	-64.075	0.4226
-0.096976	-64.526	0.48114	-65.35	0.47183	-64.064	0.40848
-0.096777	-64.514	0.45595	-65.367	0.4913	-64.069	0.40466
-0.096577	-64.345	0.42854	-65.345	0.49657	-64.069	0.42194
-0.096378	-64.037	0.41066	-65.316	0.46282	-64.064	0.43779
-0.096179	-63.948	0.39873	-65.339	0.47266	-64.059	0.45975
-0.09598	-63.983	0.38555	-65.28	0.4709	-64.057	0.49066
-0.09578	-64	0.36443	-65.268	0.4396	-64.035	0.51798
-0.095581	-64.03	0.36793	-65.268	0.44496	-64.021	0.53367
-0.095382	-64.072	0.36689	-65.246	0.41585	-64.021	0.56219
-0.095183	-64.105	0.36309	-65.272	0.41237	-63.995	0.56038
-0.094983	-64.119	0.35667	-65.269	0.43495	-63.923	0.55444
-0.094784	-64.13	0.35238	-65.271	0.4338	-63.88	0.56139
-0.094585	-64.149	0.34834	-65.28	0.43453	-63.836	0.57085
-0.094385	-64.186	0.3513	-65.271	0.43575	-63.776	0.57525
-0.094186	-64.21	0.35568	-65.28	0.42233	-63.677	0.57163
-0.093987	-64.217	0.3598	-65.295	0.41413	-63.653	0.56823
-0.093788	-64.21	0.36653	-65.286	0.42084	-63.604	0.56741
-0.093588	-64.204	0.3684	-65.289	0.40988	-63.575	0.56107
-0.093389	-64.197	0.3715	-65.295	0.40702	-63.589	0.56381
-0.09319	-64.174	0.37799	-65.294	0.40449	-63.654	0.5576
-0.092991	-64.172	0.3845	-65.306	0.40703	-63.699	0.56987
-0.092791	-64.136	0.39751	-65.323	0.41742	-63.733	0.55137
-0.092592	-64.114	0.41274	-65.294	0.41397	-63.752	0.56129
-0.092393	-64.09	0.42624	-65.329	0.40312	-63.767	0.56684
-0.092193	-64.101	0.42921	-65.338	0.40887	-63.771	0.5695
-0.091994	-64.104	0.43411	-65.338	0.39712	-63.8	0.56164
-0.091795	-64.102	0.43662	-65.368	0.38564	-63.826	0.5656
-0.091596	-64.105	0.44202	-65.338	0.39682	-63.854	0.57202
-0.091396	-64.116	0.44802	-65.292	0.38317	-63.874	0.59844
-0.091197	-64.116	0.45532	-65.329	0.37611	-63.916	0.58896
-0.090998	-64.116	0.46034	-65.258	0.37896	-63.971	0.58767
-0.090799	-64.113	0.46646	-65.24	0.33267	-64.049	0.59246
-0.090599	-64.125	0.47036	-65.236	0.32647	-64.059	0.59663
-0.0904	-64.133	0.47297	-65.225	0.2992	-64.1	0.59627
-0.090201	-64.131	0.47578	-65.236	0.25694	-64.164	0.59572
-0.090001	-64.128	0.47844	-65.2	0.2435	-64.187	0.59657
-0.089802	-64.114	0.47769	-65.156	0.23101	-64.198	0.59677
-0.089603	-64.102	0.47809	-65.142	0.21392	-64.201	0.59329
-0.089404	-64.098	0.47596	-65.139	0.21184	-64.2	0.59342
-0.089204	-64.11	0.47829	-65.15	0.19878	-64.187	0.60152
-0.089005	-64.14	0.47803	-65.173	0.18509	-64.187	0.6003
-0.088806	-64.159	0.47681	-65.214	0.20464	-64.19	0.60804
-0.088607	-64.18	0.4818	-65.17	0.18195	-64.19	0.62336
-0.088407	-64.186	0.48481	-65.17	0.19339	-64.2	0.63215
-0.088208	-64.186	0.48789	-65.123	0.19269	-64.2	0.63466
-0.088009	-64.186	0.49155	-65.075	0.18106	-64.2	0.6288
-0.087809	-64.178	0.49473	-65.078	0.19511	-64.163	0.62425
-0.08761	-64.165	0.51364	-65.045	0.20972	-64.126	0.62621
-0.087411	-64.165	0.52085	-65.057	0.17573	-64.085	0.61314
-0.087212	-64.096	0.52256	-65.127	0.20327	-64.096	0.61275
-0.087012	-64.079	0.5214	-65.115	0.21011	-64.103	0.61393
-0.086813	-64.079	0.51876	-65.162	0.18682	-64.103	0.60699
-0.086614	-64.079	0.51823	-65.15	0.24237	-64.124	0.61983
-0.086415	-64.079	0.51635	-65.103	0.24414	-64.146	0.6207
-0.086215	-64.079	0.51227	-65.095	0.25134	-64.151	0.63508
-0.086016	-64.079	0.49883	-65.051	0.25914	-64.189	0.63921
-0.085817	-64.102	0.48686	-64.976	0.24985	-64.222	0.64605
-0.085617	-64.125	0.48405	-64.964	0.25251	-64.152	0.6599
-0.085418	-64.18	0.47732	-64.906	0.23789	-64.102	0.67243
-0.085219	-64.212	0.46788	-64.88	0.2187	-63.987	0.68118
-0.08502	-64.227	0.46636	-64.895	0.23107	-63.944	0.67535
-0.08482	-64.243	0.46085	-64.866	0.21875	-63.933	0.67526
-0.084621	-64.261	0.45618	-64.837	0.20419	-63.909	0.67377
-0.084422	-64.291	0.45125	-64.857	0.21835	-63.915	0.67175
-0.084223	-64.301	0.44672	-64.824	0.20558	-63.924	0.67065
-0.084023	-64.304	0.4443	-64.865	0.19691	-63.953	0.63522
-0.083824	-64.308	0.44393	-64.891	0.19222	-63.974	0.59565
-0.083625	-64.32	0.43915	-64.915	0.18773	-63.974	0.54723
-0.083425	-64.329	0.43526	-64.93	0.19186	-63.982	0.50021
-0.083226	-64.357	0.42397	-64.93	0.21163	-63.99	0.46799
-0.083027	-64.372	0.41797	-64.933	0.22087	-64.013	0.43447
-0.082828	-64.375	0.41323	-64.929	0.2371	-64.023	0.40867
-0.082628	-64.384	0.41038	-64.907	0.25233	-63.981	0.35104
-0.082429	-64.395	0.40955	-64.904	0.26686	-63.955	0.31996
-0.08223	-64.407	0.40655	-64.933	0.28717	-63.937	0.27758
-0.082031	-64.429	0.40313	-64.917	0.29411	-63.933	0.2496
-0.081831	-64.458	0.3975	-64.927	0.33779	-63.935	0.24911
-0.081632	-64.47	0.38432	-64.917	0.35148	-63.933	0.25598
-0.081433	-64.485	0.37899	-64.924	0.36063	-63.926	0.26599
-0.081233	-64.503	0.37056	-64.932	0.37133	-63.931	0.28464
-0.081034	-64.516	0.35862	-64.917	0.38819	-63.932	0.33248
-0.080835	-64.523	0.35851	-64.929	0.39414	-63.933	0.37337
-0.080636	-64.528	0.35654	-64.95	0.40759	-63.92	0.41
-0.080436	-64.528	0.3545	-64.93	0.44175	-63.909	0.43532
-0.080237	-64.539	0.35246	-64.95	0.46756	-63.876	0.43531
-0.080038	-64.542	0.34759	-64.965	0.49544	-63.863	0.43839
-0.079839	-64.534	0.34402	-64.941	0.50383	-63.827	0.46003
-0.079639	-64.539	0.33723	-64.941	0.52389	-63.796	0.4762
-0.07944	-64.542	0.3346	-64.926	0.53936	-63.748	0.48583
-0.079241	-64.548	0.3357	-64.933	0.53112	-63.705	0.48236
-0.079041	-64.554	0.3594	-64.941	0.55238	-63.756	0.47034
-0.078842	-64.551	0.38805	-64.93	0.58094	-63.797	0.46425
-0.078643	-64.545	0.40167	-64.933	0.58089	-63.797	0.46876
-0.078444	-64.537	0.39748	-64.941	0.6189	-63.811	0.48359
-0.078244	-64.537	0.39372	-64.878	0.63404	-63.822	0.51851
-0.078045	-64.557	0.38866	-64.94	0.66119	-63.826	0.54022
-0.077846	-64.557	0.38336	-64.946	0.6828	-63.837	0.56
-0.077647	-64.56	0.38142	-64.94	0.68886	-63.854	0.56304
-0.077447	-64.564	0.37789	-64.956	0.69306	-63.932	0.56403
-0.077248	-64.561	0.36	-64.962	0.70963	-63.948	0.56449
-0.077049	-64.561	0.34861	-64.962	0.71439	-63.962	0.55683
-0.076849	-64.539	0.34279	-64.946	0.71812	-63.993	0.54329
-0.07665	-64.52	0.3363	-64.865	0.73435	-63.999	0.53383
-0.076451	-64.502	0.33277	-64.79	0.74886	-64.008	0.5256
-0.076252	-64.47	0.33031	-64.741	0.76628	-64.01	0.50692
-0.076052	-64.479	0.32966	-64.686	0.77661	-64.032	0.48651
-0.075853	-64.465	0.34184	-64.669	0.77931	-64.054	0.46315
-0.075654	-64.449	0.35523	-64.621	0.81001	-64.08	0.4243
-0.075455	-64.441	0.36171	-64.584	0.81401	-64.104	0.42075
-0.075255	-64.413	0.36536	-64.532	0.82567	-64.129	0.41811
-0.075056	-64.413	0.37255	-64.578	0.83974	-64.129	0.39586
-0.074857	-64.423	0.3761	-64.569	0.83643	-64.129	0.39503
-0.074658	-64.401	0.37706	-64.569	0.84319	-64.097	0.40425
-0.074458	-64.424	0.37674	-64.601	0.86814	-64.082	0.41015
-0.074259	-64.442	0.37614	-64.578	0.85902	-64.097	0.42118
-0.07406	-64.476	0.37099	-64.601	0.86757	-64.114	0.43772
-0.07386	-64.5	0.35957	-64.61	0.88049	-64.178	0.4488
-0.073661	-64.51	0.34978	-64.572	0.86936	-64.211	0.47403
-0.073462	-64.525	0.3425	-64.584	0.87016	-64.279	0.49439
-0.073263	-64.558	0.3306	-64.589	0.86521	-64.269	0.52015
-0.073063	-64.592	0.32555	-64.618	0.85424	-64.269	0.52843
-0.072864	-64.601	0.32136	-64.589	0.86766	-64.268	0.55264
-0.072665	-64.59	0.30619	-64.625	0.85606	-64.267	0.56852
-0.072466	-64.545	0.29948	-64.671	0.84589	-64.268	0.58208
-0.072266	-64.481	0.29818	-64.636	0.85876	-64.267	0.5813
-0.072067	-64.453	0.2944	-64.66	0.84467	-64.264	0.55324
-0.071868	-64.453	0.29705	-64.682	0.83699	-64.263	0.53065
-0.071668	-64.442	0.29477	-64.671	0.84284	-64.263	0.52833
-0.071469	-64.436	0.28676	-64.671	0.84001	-64.25	0.51122
-0.07127	-64.436	0.28373	-64.665	0.83856	-64.191	0.51026
-0.071071	-64.432	0.2737	-64.671	0.84099	-64.208	0.5001
-0.070871	-64.432	0.26564	-64.714	0.8326	-64.217	0.49033
-0.070672	-64.442	0.25686	-64.721	0.83915	-64.223	0.48443
-0.070473	-64.459	0.2482	-64.761	0.82291	-64.229	0.47808
-0.070274	-64.482	0.24524	-64.807	0.80524	-64.196	0.48212
-0.070074	-64.491	0.24471	-64.817	0.81407	-64.167	0.48129
-0.069875	-64.513	0.24312	-64.828	0.80032	-64.167	0.48318
-0.069676	-64.535	0.23626	-64.866	0.80056	-64.167	0.48133
-0.069476	-64.534	0.22914	-64.839	0.83137	-64.154	0.47832
-0.069277	-64.531	0.22766	-64.851	0.82513	-64.1	0.47693
-0.069078	-64.531	0.2264	-64.889	0.82671	-64.069	0.47838
-0.068879	-64.531	0.21016	-64.871	0.84861	-64.063	0.48435
-0.068679	-64.534	0.20556	-64.921	0.84824	-64.065	0.48232
-0.06848	-64.542	0.20811	-64.944	0.88244	-64.076	0.46935
-0.068281	-64.551	0.21069	-64.895	0.88683	-64.076	0.4769
-0.068082	-64.563	0.21127	-64.933	0.88941	-64.074	0.49872
-0.067882	-64.575	0.21681	-64.921	0.90327	-64.074	0.49956
-0.067683	-64.59	0.2208	-64.903	0.90712	-64.074	0.49896
-0.067484	-64.636	0.22956	-64.904	0.91382	-64.068	0.49223
-0.067284	-64.641	0.23392	-64.894	0.91201	-64.07	0.48233
-0.067085	-64.65	0.23924	-64.86	0.90851	-64.071	0.4664
-0.066886	-64.655	0.24367	-64.883	0.8855	-64.076	0.46211
-0.066687	-64.662	0.2464	-64.836	0.8718	-64.08	0.46322
-0.066487	-64.709	0.2486	-64.833	0.83755	-64.09	0.46667
-0.066288	-64.723	0.25227	-64.82	0.83293	-64.097	0.47492
-0.066089	-64.752	0.25436	-64.77	0.82737	-64.098	0.48288
-0.06589	-64.766	0.25244	-64.758	0.7926	-64.101	0.57066
-0.06569	-64.781	0.2495	-64.74	0.81409	-64.097	0.62886
-0.065491	-64.781	0.24864	-64.747	0.79181	-64.098	0.62836
-0.065292	-64.772	0.2428	-64.77	0.77108	-64.098	0.63813
-0.065092	-64.757	0.23729	-64.763	0.76776	-64.115	0.6549
-0.064893	-64.74	0.23294	-64.755	0.76313	-64.126	0.65422
-0.064694	-64.719	0.22683	-64.718	0.7681	-64.13	0.64888
-0.064495	-64.671	0.21919	-64.717	0.78527	-64.13	0.63776
-0.064295	-64.612	0.21688	-64.685	0.78891	-64.137	0.63055
-0.064096	-64.607	0.21519	-64.668	0.79555	-64.158	0.58962
-0.063897	-64.58	0.19105	-64.657	0.80363	-64.162	0.56189
-0.063698	-64.552	0.18381	-64.645	0.80833	-64.164	0.50628
-0.063498	-64.546	0.174	-64.662	0.82445	-64.194	0.46012
-0.063299	-64.546	0.16893	-64.651	0.83073	-64.194	0.41069
-0.0631	-64.532	0.1636	-64.657	0.82382	-64.209	0.36139
-0.0629	-64.523	0.15557	-64.662	0.84091	-64.252	0.31894
-0.062701	-64.532	0.15417	-64.627	0.85611	-64.27	0.28444
-0.062502	-64.537	0.15219	-64.639	0.85365	-64.27	0.25779
-0.062303	-64.528	0.14987	-64.701	0.85727	-64.286	0.22913
-0.062103	-64.511	0.15122	-64.701	0.85675	-64.306	0.18375
-0.061904	-64.511	0.15946	-64.701	0.86395	-64.313	0.16783
-0.061705	-64.497	0.1625	-64.741	0.88185	-64.366	0.16638
-0.061506	-64.47	0.16849	-64.735	0.89593	-64.371	0.15894
-0.061306	-64.474	0.16583	-64.75	0.90794	-64.389	0.15598
-0.061107	-64.485	0.16663	-64.758	0.90625	-64.395	0.15465
-0.060908	-64.496	0.1738	-64.735	0.91118	-64.416	0.15266
-0.060708	-64.513	0.18717	-64.758	0.95252	-64.422	0.14815
-0.060509	-64.531	0.19013	-64.755	0.95261	-64.429	0.16731
-0.06031	-64.537	0.18474	-64.747	0.9595	-64.429	0.17033
-0.060111	-64.549	0.18253	-64.741	0.97619	-64.422	0.17077
-0.059911	-64.551	0.18838	-64.715	0.96354	-64.402	0.22677
-0.059712	-64.528	0.19477	-64.732	0.96897	-64.395	0.2897
-0.059513	-64.485	0.19706	-64.737	0.96143	-64.358	0.3689
-0.059314	-64.465	0.20176	-64.732	0.94379	-64.334	0.40828
-0.059114	-64.465	0.20275	-64.732	0.9395	-64.334	0.40866
-0.058915	-64.465	0.21121	-64.7	0.93413	-64.314	0.40961
-0.058716	-64.481	0.21942	-64.677	0.91998	-64.313	0.42087
-0.058516	-64.481	0.22567	-64.697	0.9233	-64.3	0.44508
-0.058317	-64.502	0.23866	-64.669	0.88972	-64.292	0.44787
-0.058118	-64.506	0.24598	-64.608	0.88502	-64.279	0.42697
-0.057919	-64.506	0.24828	-64.581	0.85539	-64.274	0.36832
-0.057719	-64.534	0.2486	-64.54	0.85713	-64.283	0.34181
-0.05752	-64.534	0.24786	-64.518	0.84736	-64.281	0.32386
-0.057321	-64.534	0.24748	-64.479	0.81314	-64.273	0.31498
-0.057122	-64.534	0.24786	-64.457	0.79574	-64.274	0.30009
-0.056922	-64.534	0.2426	-64.448	0.78453	-64.281	0.29279
-0.056723	-64.506	0.23219	-64.41	0.78401	-64.285	0.27127
-0.056524	-64.503	0.22056	-64.349	0.7852	-64.303	0.26524
-0.056324	-64.499	0.21227	-64.383	0.78966	-64.303	0.2607
-0.056125	-64.484	0.20863	-64.439	0.78622	-64.302	0.27746
-0.055926	-64.479	0.2046	-64.462	0.77335	-64.313	0.27354
-0.055727	-64.471	0.20178	-64.47	0.79264	-64.285	0.27647
-0.055527	-64.503	0.19804	-64.492	0.77485	-64.277	0.27748
-0.055328	-64.535	0.19878	-64.532	0.80248	-64.274	0.2868
-0.055129	-64.552	0.19238	-64.537	0.79586	-64.27	0.31944
-0.05493	-64.56	0.19009	-64.586	0.80516	-64.263	0.3265
-0.05473	-64.581	0.18212	-64.616	0.80219	-64.253	0.34192
-0.054531	-64.593	0.18388	-64.627	0.79892	-64.248	0.35653
-0.054332	-64.613	0.19282	-64.631	0.80785	-64.234	0.37039
-0.054132	-64.626	0.19413	-64.653	0.77862	-64.226	0.37463
-0.053933	-64.624	0.19485	-64.645	0.776	-64.277	0.39534
-0.053734	-64.577	0.19436	-64.671	0.75428	-64.284	0.4228
-0.053535	-64.56	0.19288	-64.671	0.75404	-64.284	0.44732
-0.053335	-64.542	0.19118	-64.662	0.73984	-64.28	0.45742
-0.053136	-64.542	0.19199	-64.714	0.73293	-64.28	0.46051
-0.052937	-64.542	0.18527	-64.683	0.73639	-64.27	0.46283
-0.052738	-64.542	0.17893	-64.717	0.71812	-64.27	0.46619
-0.052538	-64.542	0.17572	-64.732	0.71133	-64.209	0.47715
-0.052339	-64.586	0.17515	-64.729	0.68691	-64.203	0.47174
-0.05214	-64.622	0.17349	-64.741	0.67981	-64.203	0.47123
-0.05194	-64.647	0.16314	-64.77	0.68005	-64.19	0.43732
-0.051741	-64.68	0.1437	-64.747	0.67112	-64.19	0.41773
-0.051542	-64.706	0.12965	-64.779	0.67019	-64.19	0.41203
-0.051343	-64.702	0.12826	-64.772	0.66837	-64.19	0.40507
-0.051143	-64.642	0.12685	-64.764	0.67528	-64.178	0.40069
-0.050944	-64.597	0.12639	-64.788	0.67604	-64.203	0.38869
-0.050745	-64.587	0.12767	-64.782	0.67043	-64.257	0.38123
-0.050546	-64.587	0.12981	-64.795	0.666	-64.258	0.37612
-0.050346	-64.587	0.1294	-64.828	0.66247	-64.251	0.3693
-0.050147	-64.587	0.13204	-64.811	0.66783	-64.241	0.3661
-0.049948	-64.597	0.13598	-64.824	0.67447	-64.239	0.36206
-0.049748	-64.641	0.13739	-64.848	0.68181	-64.195	0.36827
-0.049549	-64.69	0.14097	-64.84	0.69029	-64.217	0.38328
-0.04935	-64.719	0.14632	-64.865	0.68816	-64.22	0.41623
-0.049151	-64.78	0.14438	-64.84	0.69107	-64.222	0.43853
-0.048951	-64.795	0.15844	-64.843	0.68382	-64.214	0.45796
-0.048752	-64.796	0.16404	-64.888	0.69179	-64.22	0.48926
-0.048553	-64.787	0.17047	-64.865	0.68819	-64.23	0.50494
-0.048354	-64.78	0.17657	-64.892	0.69672	-64.241	0.53686
-0.048154	-64.766	0.17972	-64.888	0.69944	-64.248	0.54641
-0.047955	-64.737	0.18553	-64.845	0.68802	-64.291	0.53646
-0.047756	-64.696	0.19044	-64.863	0.69404	-64.301	0.51873
-0.047556	-64.626	0.19304	-64.863	0.69002	-64.309	0.51828
-0.047357	-64.534	0.19824	-64.842	0.67429	-64.309	0.5014
-0.047158	-64.534	0.20198	-64.737	0.69196	-64.309	0.48553
-0.046959	-64.545	0.20862	-64.621	0.69262	-64.323	0.45247
-0.046759	-64.557	0.21087	-64.567	0.69612	-64.363	0.44198
-0.04656	-64.568	0.21303	-64.47	0.70675	-64.374	0.41676
-0.046361	-64.568	0.21107	-64.425	0.70227	-64.381	0.38743
-0.046162	-64.554	0.21049	-64.421	0.70128	-64.394	0.38445
-0.045962	-64.587	0.21063	-64.416	0.68341	-64.392	0.37544
-0.045763	-64.607	0.20686	-64.436	0.68732	-64.389	0.36662
-0.045564	-64.61	0.20391	-64.421	0.6595	-64.345	0.36954
-0.045364	-64.6	0.20235	-64.451	0.62561	-64.316	0.36795
-0.045165	-64.587	0.20005	-64.485	0.5963	-64.312	0.37393
-0.044966	-64.574	0.19817	-64.439	0.58261	-64.289	0.3752
-0.044767	-64.58	0.19666	-64.486	0.52736	-64.25	0.36808
-0.044567	-64.568	0.19056	-64.506	0.52763	-64.241	0.3775
-0.044368	-64.548	0.18658	-64.485	0.51815	-64.241	0.38189
-0.044169	-64.539	0.18852	-64.529	0.48688	-64.241	0.38479
-0.04397	-64.525	0.1849	-64.528	0.45512	-64.244	0.37775
-0.04377	-64.557	0.17921	-64.505	0.41775	-64.263	0.37207
-0.043571	-64.561	0.17648	-64.55	0.37177	-64.322	0.36348
-0.043372	-64.601	0.17645	-64.534	0.36186	-64.339	0.36206
-0.043172	-64.612	0.18796	-64.55	0.33049	-64.341	0.36557
-0.042973	-64.622	0.18746	-64.619	0.32677	-64.318	0.35507
-0.042774	-64.622	0.186	-64.555	0.31873	-64.313	0.37903
-0.042575	-64.622	0.18549	-64.613	0.2999	-64.298	0.37858
-0.042375	-64.622	0.18025	-64.665	0.3066	-64.272	0.40314
-0.042176	-64.627	0.17787	-64.631	0.3076	-64.269	0.40796
-0.041977	-64.607	0.17634	-64.692	0.30284	-64.262	0.44178
-0.041778	-64.609	0.17231	-64.691	0.29697	-64.257	0.45588
-0.041578	-64.604	0.16719	-64.691	0.28899	-64.242	0.46932
-0.041379	-64.603	0.15937	-64.714	0.2879	-64.211	0.50951
-0.04118	-64.606	0.1434	-64.714	0.31918	-64.191	0.53721
-0.04098	-64.606	0.11908	-64.796	0.32379	-64.233	0.57389
-0.040781	-64.606	0.11001	-64.827	0.31441	-64.263	0.62088
-0.040582	-64.593	0.10003	-64.808	0.30834	-64.274	0.64045
-0.040383	-64.584	0.092945	-64.816	0.30255	-64.274	0.66243
-0.040183	-64.587	0.088482	-64.851	0.30967	-64.274	0.67012
-0.039984	-64.584	0.085466	-64.816	0.29929	-64.268	0.68751
-0.039785	-64.578	0.081553	-64.842	0.29792	-64.209	0.6966
-0.039586	-64.563	0.076924	-64.853	0.28885	-64.192	0.70252
-0.039386	-64.539	0.07528	-64.866	0.26273	-64.178	0.70078
-0.039187	-64.519	0.068344	-64.897	0.24514	-64.163	0.70549
-0.038988	-64.445	0.065503	-64.891	0.20993	-64.153	0.70261
-0.038788	-64.438	0.065059	-64.897	0.1675	-64.121	0.69097
-0.038589	-64.384	0.065558	-64.886	0.14458	-64.109	0.62041
-0.03839	-64.441	0.062202	-64.846	0.14127	-64.109	0.56432
-0.038191	-64.464	0.061685	-64.819	0.13466	-64.109	0.58431
-0.037991	-64.476	0.060878	-64.836	0.13547	-64.103	0.58706
-0.037792	-64.487	0.061314	-64.848	0.15537	-64.103	0.5929
-0.037593	-64.497	0.069768	-64.875	0.16687	-64.113	0.58723
-0.037394	-64.502	0.073072	-64.868	0.18637	-64.121	0.58362
-0.037194	-64.505	0.076071	-64.88	0.21174	-64.121	0.57501
-0.036995	-64.519	0.080841	-64.918	0.23636	-64.129	0.57155
-0.036796	-64.528	0.086198	-64.909	0.26569	-64.129	0.56671
-0.036596	-64.54	0.10027	-64.837	0.30279	-64.125	0.56254
-0.036397	-64.552	0.12082	-64.906	0.30936	-64.161	0.56726
-0.036198	-64.555	0.13448	-64.853	0.33525	-64.174	0.52032
-0.035999	-64.561	0.14795	-64.853	0.33591	-64.174	0.50366
-0.035799	-64.561	0.15894	-64.894	0.31933	-64.173	0.51985
-0.0356	-64.568	0.16393	-64.842	0.34592	-64.173	0.52325
-0.035401	-64.561	0.17759	-64.88	0.34689	-64.178	0.53836
-0.035202	-64.564	0.18998	-64.9	0.34554	-64.192	0.5573
-0.035002	-64.56	0.19294	-64.9	0.36388	-64.239	0.57457
-0.034803	-64.56	0.19678	-64.918	0.35361	-64.259	0.58564
-0.034604	-64.571	0.20517	-64.923	0.338	-64.27	0.59791
-0.034404	-64.575	0.2111	-64.932	0.34838	-64.294	0.62585
-0.034205	-64.56	0.21112	-64.946	0.35963	-64.331	0.62766
-0.034006	-64.56	0.2111	-64.94	0.33653	-64.379	0.63837
-0.033807	-64.563	0.20007	-64.946	0.31093	-64.384	0.61948
-0.033607	-64.56	0.19485	-64.952	0.29193	-64.384	0.60415
-0.033408	-64.558	0.1923	-64.94	0.29259	-64.4	0.59456
-0.033209	-64.558	0.1915	-64.938	0.28304	-64.421	0.6007
-0.03301	-64.558	0.19311	-64.915	0.26932	-64.438	0.57342
-0.03281	-64.551	0.19545	-64.921	0.27282	-64.397	0.55841
-0.032611	-64.546	0.1945	-64.898	0.26276	-64.357	0.5303
-0.032412	-64.551	0.19282	-64.898	0.25355	-64.312	0.50906
-0.032212	-64.552	0.19358	-64.94	0.25873	-64.239	0.48147
-0.032013	-64.552	0.19016	-64.877	0.25168	-64.214	0.47692
-0.031814	-64.552	0.18669	-64.915	0.2402	-64.189	0.45063
-0.031615	-64.555	0.18249	-64.915	0.24034	-64.173	0.43907
-0.031415	-64.558	0.17703	-64.882	0.23987	-64.139	0.42751
-0.031216	-64.526	0.16596	-64.915	0.20667	-64.09	0.42243
-0.031017	-64.442	0.15819	-64.952	0.22218	-64.093	0.43891
-0.030818	-64.412	0.15132	-64.965	0.19367	-64.146	0.45017
-0.030618	-64.375	0.14445	-64.969	0.19399	-64.115	0.44232
-0.030419	-64.294	0.14458	-64.985	0.19895	-64.035	0.44749
-0.03022	-64.297	0.14116	-65.011	0.17805	-64.03	0.4505
-0.03002	-64.34	0.14009	-65.011	0.22003	-64.032	0.46245
-0.029821	-64.363	0.13155	-65.052	0.20598	-64.054	0.49533
-0.029622	-64.386	0.12736	-65.062	0.1786	-64.075	0.50571
-0.029423	-64.365	0.12729	-65.054	0.20151	-64.119	0.52225
-0.029223	-64.343	0.12489	-65.089	0.20061	-64.134	0.52776
-0.029024	-64.339	0.12256	-65.072	0.19441	-64.152	0.52669
-0.028825	-64.343	0.12281	-65.072	0.20903	-64.201	0.53401
-0.028626	-64.391	0.11996	-65.1	0.20089	-64.201	0.53776
-0.028426	-64.415	0.12146	-65.017	0.21577	-64.207	0.53371
-0.028227	-64.423	0.12516	-65.078	0.21585	-64.207	0.53741
-0.028028	-64.439	0.12818	-65.092	0.22234	-64.198	0.53311
-0.027828	-64.439	0.1281	-65.081	0.23211	-64.198	0.5195
-0.027629	-64.439	0.13108	-65.113	0.21818	-64.202	0.49826
-0.02743	-64.439	0.13589	-65.113	0.21837	-64.209	0.47216
-0.027231	-64.439	0.13706	-65.071	0.23045	-64.215	0.46042
-0.027031	-64.441	0.14101	-65.045	0.2027	-64.215	0.42219
-0.026832	-64.449	0.15009	-65.004	0.19963	-64.202	0.38484
-0.026633	-64.464	0.15472	-64.993	0.20996	-64.186	0.32871
-0.026434	-64.464	0.15783	-64.991	0.19475	-64.18	0.26395
-0.026234	-64.465	0.15855	-64.95	0.20818	-64.172	0.20384
-0.026035	-64.473	0.1565	-64.921	0.2053	-64.139	0.15903
-0.025836	-64.473	0.15444	-64.976	0.18653	-64.139	0.13104
-0.025636	-64.473	0.15301	-65.04	0.18345	-64.139	0.10155
-0.025437	-64.468	0.15357	-65.104	0.1847	-64.126	0.087712
-0.025238	-64.473	0.15021	-65.11	0.18868	-64.093	0.065565
-0.025039	-64.485	0.15048	-65.118	0.19847	-64.076	0.060974
-0.024839	-64.5	0.14846	-65.103	0.1969	-64.096	0.064422
-0.02464	-64.51	0.15405	-65.042	0.19523	-64.079	0.10581
-0.024441	-64.51	0.15562	-65.034	0.19843	-64.063	0.14718
-0.024242	-64.5	0.15413	-65.005	0.19187	-64.067	0.2089
-0.024042	-64.491	0.14161	-65.004	0.19684	-64.058	0.23686
-0.023843	-64.487	0.13492	-65.02	0.1984	-64.049	0.26465
-0.023644	-64.461	0.13216	-65.051	0.19982	-64.045	0.29663
-0.023444	-64.465	0.13081	-65.037	0.20597	-64.04	0.3107
-0.023245	-64.473	0.12828	-65.069	0.20779	-64.059	0.31216
-0.023046	-64.479	0.12445	-65.089	0.209	-64.059	0.30551
-0.022847	-64.476	0.12121	-65.084	0.21025	-64.052	0.30746
-0.022647	-64.476	0.11622	-65.13	0.20827	-64.019	0.3022
-0.022448	-64.482	0.10703	-65.11	0.2137	-64.027	0.31608
-0.022249	-64.485	0.10359	-65.11	0.21231	-64.08	0.32949
-0.02205	-64.482	0.098698	-65.173	0.21062	-64.161	0.32453
-0.02185	-64.479	0.093416	-65.174	0.23699	-64.19	0.32202
-0.021651	-64.485	0.090966	-65.174	0.24832	-64.237	0.35161
-0.021452	-64.493	0.081488	-65.217	0.26956	-64.207	0.33963
-0.021252	-64.503	0.073505	-65.223	0.28453	-64.169	0.3573
-0.021053	-64.506	0.069473	-65.2	0.27661	-64.123	0.36796
-0.020854	-64.523	0.063888	-65.191	0.27897	-64.059	0.38465
-0.020655	-64.537	0.059726	-65.216	0.28388	-63.975	0.41229
-0.020455	-64.539	0.046863	-65.184	0.26287	-63.975	0.42373
-0.020256	-64.539	0.03298	-65.185	0.26387	-63.975	0.41325
-0.020057	-64.578	0.028519	-65.179	0.26919	-63.968	0.43121
-0.019858	-64.549	0.030377	-65.132	0.26481	-63.963	0.44231
-0.019658	-64.551	0.040715	-65.132	0.24992	-63.963	0.44598
-0.019459	-64.566	0.05342	-65.126	0.24243	-63.957	0.46141
-0.01926	-64.571	0.062499	-65.106	0.2582	-63.869	0.49914
-0.01906	-64.574	0.065436	-65.118	0.24736	-63.875	0.52932
-0.018861	-64.604	0.070964	-65.11	0.24389	-63.883	0.53954
-0.018662	-64.616	0.077284	-65.101	0.23983	-63.89	0.56522
-0.018463	-64.615	0.079158	-65.101	0.22921	-63.89	0.59012
-0.018263	-64.606	0.087056	-65.069	0.22378	-63.89	0.60764
-0.018064	-64.607	0.087155	-65.068	0.23602	-63.875	0.62158
-0.017865	-64.607	0.084668	-65.066	0.22243	-63.88	0.63746
-0.017666	-64.612	0.082587	-65.054	0.19704	-63.88	0.64865
-0.017466	-64.61	0.080868	-65.057	0.19962	-63.919	0.64757
-0.017267	-64.612	0.076113	-65.054	0.1949	-63.929	0.67124
-0.017068	-64.606	0.07038	-65.054	0.18844	-63.949	0.65916
-0.016868	-64.618	0.066242	-65.059	0.19023	-63.963	0.65148
-0.016669	-64.638	0.061824	-65.062	0.18449	-63.985	0.62808
-0.01647	-64.645	0.059068	-65.059	0.18222	-63.985	0.6114
-0.016271	-64.644	0.0513	-65.066	0.18153	-63.999	0.60706
-0.016071	-64.589	0.046711	-65.066	0.16283	-63.988	0.59188
-0.015872	-64.546	0.056726	-65.068	0.15563	-63.988	0.53913
-0.015673	-64.528	0.063273	-65.072	0.13484	-63.999	0.49134
-0.015474	-64.525	0.077901	-65.069	0.11263	-64.034	0.34895
-0.015274	-64.522	0.090321	-65.037	0.095618	-64.08	0.26192
-0.015075	-64.506	0.10505	-65.03	0.11039	-64.096	0.23808
-0.014876	-64.505	0.1099	-65.051	0.11055	-64.004	0.19849
-0.014676	-64.488	0.12567	-65.011	0.22488	-64.013	0.23608
-0.014477	-64.488	0.12284	-65.03	0.32861	-64.032	0.25726
-0.014278	-64.494	0.12462	-65.011	0.35619	-64.014	0.24429
-0.014079	-64.505	0.12683	-65.004	0.49282	-63.905	0.26053
-0.013879	-64.496	0.12715	-65.042	0.54474	-63.863	0.27236
-0.01368	-64.496	0.12404	-65.037	0.57716	-63.818	0.29377
-0.013481	-64.49	0.12206	-65.028	0.58614	-63.849	0.29562
-0.013282	-64.479	0.11831	-64.99	0.5845	-63.866	0.31148
-0.013082	-64.465	0.1121	-64.949	0.58182	-63.914	0.33376
-0.012883	-64.478	0.10841	-64.856	0.57098	-63.944	0.34651
-0.012684	-64.502	0.10621	-64.892	0.56367	-63.966	0.35736
-0.012484	-64.52	0.096864	-64.856	0.55462	-63.991	0.35548
-0.012285	-64.497	0.087852	-64.874	0.55289	-64.002	0.35708
-0.012086	-64.487	0.091731	-64.853	0.55212	-64.021	0.36965
-0.011887	-64.487	0.095191	-64.766	0.53836	-64.021	0.37057
-0.011687	-64.493	0.10204	-64.753	0.54741	-64.035	0.37394
-0.011488	-64.478	0.11192	-64.602	0.54118	-64.057	0.37975
-0.011289	-64.478	0.13214	-64.56	0.53208	-64.069	0.3898
-0.01109	-64.439	0.13432	-64.535	0.53518	-64.101	0.37967
-0.01089	-64.333	0.13475	-64.463	0.53123	-64.069	0.36596
-0.010691	-64.304	0.13448	-64.463	0.51844	-64.002	0.35268
-0.010492	-64.304	0.13384	-64.494	0.52515	-63.927	0.35851
-0.010292	-64.297	0.13428	-64.451	0.52347	-63.923	0.34341
-0.010093	-64.307	0.13615	-64.474	0.50587	-63.919	0.35409
-0.0098939	-64.311	0.13738	-64.502	0.49366	-63.915	0.47726
-0.0096946	-64.323	0.12465	-64.505	0.47656	-63.915	0.52363
-0.0094953	-64.328	0.12056	-64.538	0.45945	-63.965	0.54051
-0.0092961	-64.354	0.11511	-64.65	0.4396	-63.99	0.56035
-0.0090968	-64.365	0.10979	-64.691	0.42017	-64.019	0.57659
-0.0088975	-64.368	0.11314	-64.721	0.41322	-64.014	0.59906
-0.0086983	-64.368	0.1212	-64.735	0.40258	-64.014	0.62159
-0.008499	-64.375	0.13126	-64.796	0.34992	-64.021	0.65153
-0.0082997	-64.401	0.14214	-64.813	0.35685	-64.054	0.68524
-0.0081004	-64.401	0.14935	-64.805	0.33588	-64.064	0.71246
-0.0079012	-64.401	0.14998	-64.83	0.30595	-64.091	0.72009
-0.0077019	-64.401	0.14748	-64.83	0.34725	-64.11	0.73563
-0.0075026	-64.401	0.14832	-64.819	0.33589	-64.128	0.76834
-0.0073033	-64.378	0.1509	-64.846	0.3265	-64.128	0.78015
-0.0071041	-64.311	0.1478	-64.842	0.34069	-64.118	0.80324
-0.0069048	-64.243	0.14535	-64.819	0.29798	-64.104	0.80291
-0.0067055	-64.239	0.14463	-64.842	0.31614	-64.108	0.80994
-0.0065063	-64.195	0.16484	-64.814	0.3269	-64.108	0.80634
-0.006307	-64.178	0.16858	-64.814	0.32011	-64.108	0.8333
-0.0061077	-64.157	0.17154	-64.842	0.34465	-64.108	0.84328
-0.0059084	-64.162	0.17848	-64.814	0.35043	-64.121	0.85279
-0.0057092	-64.157	0.18232	-64.814	0.35387	-64.121	0.85389
-0.0055099	-64.16	0.18932	-64.842	0.39347	-64.121	0.87192
-0.0053106	-64.165	0.19517	-64.82	0.40746	-64.11	0.88916
-0.0051113	-64.178	0.20507	-64.878	0.45053	-64.11	0.88829
-0.0049121	-64.185	0.2135	-64.903	0.47973	-64.11	0.90946
-0.0047128	-64.2	0.21502	-64.984	0.548	-64.089	0.92373
-0.0045135	-64.21	0.21773	-65.017	0.58714	-64.082	0.92546
-0.0043143	-64.282	0.2203	-65.02	0.6306	-64.082	0.92169
-0.004115	-64.314	0.21995	-65.046	0.63995	-64.023	0.92388
-0.0039157	-64.304	0.22018	-65.089	0.67128	-63.781	0.9285
-0.0037164	-64.282	0.22152	-65.081	0.67247	-63.758	0.92732
-0.0035172	-64.282	0.21831	-65.068	0.68099	-63.741	0.9291
-0.0033179	-64.282	0.21903	-65.068	0.7138	-63.728	0.93943
-0.0031186	-64.282	0.21116	-65.045	0.70981	-63.728	0.94297
-0.0029193	-64.282	0.20491	-65.028	0.72576	-63.728	0.94593
-0.0027201	-64.305	0.19722	-65.036	0.72669	-63.728	0.95076
-0.0025208	-64.329	0.18986	-65.01	0.71793	-63.76	0.95555
-0.0023215	-64.369	0.18626	-65.028	0.71622	-63.804	0.96117
-0.0021223	-64.394	0.17552	-65.042	0.69298	-63.871	0.98228
-0.001923	-64.416	0.16782	-64.975	0.67177	-63.913	0.98401
-0.0017237	-64.453	0.16115	-65.019	0.67154	-63.923	0.99923
-0.0015244	-64.459	0.15334	-65.01	0.64018	-63.968	1.0154
-0.0013252	-64.473	0.14051	-64.936	0.61242	-64.002	1.0138
-0.0011259	-64.476	0.13524	-64.941	0.60148	-64.024	1.0144
-0.00092662	-64.494	0.13104	-64.941	0.59428	-64.06	1.029
-0.00072735	-64.52	0.12499	-65.01	0.58575	-64.087	1.0385
-0.00052807	-64.535	0.1235	-65.059	0.58849	-64.092	1.0046
-0.0003288	-64.548	0.12153	-65.144	0.57299	-64.104	0.99073
-0.00012953	-64.595	0.12213	-65.2	0.5922	-64.134	0.96309
6.9745e-05	-64.787	0.2964	-65.573	0.80288	-64.648	1.3476
0.00026902	-70.363	1.1258	-72.097	1.4048	-72.908	1.324
0.00046829	-71.774	1.1713	-75.103	1.1295	-75.523	1.0288
0.00066756	-72.563	1.1727	-76.449	1.0115	-76.908	0.85433
0.00086684	-73.605	1.1587	-77.302	0.91193	-78.027	0.96321
0.0010661	-74.393	1.161	-77.766	0.89324	-78.968	0.8935
0.0012654	-75.125	1.1976	-78.495	0.98042	-79.983	0.94703
0.0014647	-75.694	1.2075	-79.022	0.90495	-80.795	0.9073
0.0016639	-76.35	1.1922	-79.361	0.92125	-81.694	0.94693
0.0018632	-77.019	1.2199	-80.122	0.91212	-82.205	0.82054
0.0020625	-77.423	1.216	-80.561	0.85767	-82.946	0.8678
0.0022617	-77.803	1.2244	-81.076	0.91642	-83.459	0.77958
0.002461	-78.294	1.2231	-81.894	0.88695	-84.074	0.74529
0.0026603	-78.799	1.2172	-82.138	0.83942	-84.587	0.75253
0.0028596	-79.44	1.2109	-82.516	0.73097	-84.985	0.86033
0.0030588	-79.723	1.2238	-83.029	0.74658	-85.473	0.79821
0.0032581	-80.167	1.2173	-83.221	0.70633	-85.904	0.86663
0.0034574	-80.71	1.199	-83.703	0.73847	-86.286	0.92005
0.0036567	-81.111	1.1786	-84.164	0.69798	-86.676	0.84774
0.0038559	-81.482	1.214	-84.388	0.73396	-87.185	0.84537
0.0040552	-81.697	1.1639	-84.829	0.63814	-87.536	0.80988
0.0042545	-82.217	1.2266	-85.214	0.6273	-87.845	0.79035
0.0044537	-82.548	1.2104	-85.394	0.66375	-88.315	0.80514
0.004653	-82.739	1.2337	-85.846	0.7177	-88.697	0.82378
0.0048523	-83.076	1.234	-86.241	0.67255	-89.08	0.80073
0.0050516	-83.385	1.2795	-86.522	0.74609	-89.263	0.99576
0.0052508	-83.827	1.2803	-86.845	0.73129	-89.422	1.1049
0.0054501	-84.126	1.2754	-87.132	0.70328	-89.584	1.1222
0.0056494	-84.448	1.2729	-87.407	0.74638	-89.897	1.1653
0.0058487	-84.756	1.2827	-87.73	0.7704	-90.144	1.2462
0.0060479	-84.981	1.2658	-87.935	0.69374	-90.317	1.239
0.0062472	-85.335	1.2746	-88.224	0.70336	-90.7	1.2774
0.0064465	-85.632	1.3005	-88.52	0.72812	-91.115	1.3292
0.0066457	-85.811	1.2657	-88.701	0.70575	-91.275	1.3825
0.006845	-86.14	1.2884	-88.975	0.75517	-91.475	1.3456
0.0070443	-86.359	1.2837	-89.16	0.75163	-91.759	1.3279
0.0072436	-86.554	1.2688	-89.308	0.7655	-91.855	1.3158
0.0074428	-86.851	1.2772	-89.534	0.77812	-92.037	1.3738
0.0076421	-86.993	1.2917	-89.727	0.80387	-92.207	1.3375
0.0078414	-87.122	1.2954	-89.969	0.8431	-92.513	1.3607
0.0080407	-87.44	1.3188	-90.04	0.87182	-92.835	1.2433
0.0082399	-87.563	1.3346	-90.19	0.94668	-92.99	1.257
0.0084392	-87.862	1.3399	-90.315	0.95716	-93.208	1.1933
0.0086385	-88.072	1.3657	-90.408	0.97684	-93.666	1.1334
0.0088377	-88.126	1.3235	-90.483	0.93924	-93.88	1.0809
0.009037	-88.156	1.3309	-90.672	0.98416	-94.163	1.0478
0.0092363	-88.347	1.3398	-90.855	1.0344	-94.322	0.95241
0.0094356	-88.477	1.3356	-91.151	1.0971	-94.571	0.97419
0.0096348	-88.64	1.3414	-91.241	1.0948	-94.602	0.91081
0.0098341	-88.901	1.3201	-91.56	1.0923	-94.622	0.87427
0.010033	-89.041	1.306	-91.662	1.0996	-94.683	0.91035
0.010233	-89.27	1.2989	-91.801	1.1532	-94.904	0.79797
0.010432	-89.485	1.2953	-91.9	1.17	-95.066	0.81044
0.010631	-89.615	1.311	-92.176	1.213	-95.224	0.8117
0.01083	-89.656	1.3357	-92.231	1.1543	-95.437	0.86418
0.01103	-89.868	1.3468	-92.329	1.1182	-95.666	0.82186
0.011229	-90.009	1.3795	-92.55	1.1102	-95.829	0.82947
0.011428	-90.239	1.4204	-92.732	1.0598	-96.029	0.82265
0.011628	-90.346	1.4415	-92.878	1.0131	-96.117	0.85318
0.011827	-90.518	1.4488	-92.965	0.96586	-96.226	0.92437
0.012026	-90.643	1.4537	-93.174	1.0116	-96.35	0.90541
0.012225	-90.894	1.4445	-93.217	1.0321	-96.418	0.80928
0.012425	-91.008	1.4385	-93.361	1.083	-96.446	0.80526
0.012624	-91.13	1.4131	-93.571	1.0849	-96.491	0.84628
0.012823	-91.399	1.3977	-93.76	1.073	-96.618	0.81417
0.013022	-91.623	1.3688	-93.849	1.0808	-96.678	0.7948
0.013222	-91.702	1.339	-93.998	1.1178	-96.734	0.83389
0.013421	-92.003	1.3344	-94.262	1.1607	-96.78	0.9129
0.01362	-92.129	1.3422	-94.377	1.1542	-97.017	0.86987
0.01382	-92.169	1.3501	-94.497	1.1718	-97.098	0.80161
0.014019	-92.227	1.3507	-94.6	1.1955	-97.142	0.75518
0.014218	-92.381	1.3596	-94.714	1.1837	-97.232	0.70102
0.014417	-92.72	1.3644	-94.764	1.1772	-97.566	0.67763
0.014617	-92.816	1.3485	-94.798	1.1378	-97.657	0.6256
0.014816	-93.034	1.3342	-94.871	1.1324	-97.742	0.65867
0.015015	-93.138	1.3396	-95.019	1.1187	-97.847	0.64268
0.015214	-93.182	1.337	-95.138	1.1425	-97.99	0.61873
0.015414	-93.564	1.3253	-95.239	1.1714	-98.059	0.66977
0.015613	-93.657	1.3204	-95.37	1.1834	-98.26	0.69715
0.015812	-93.771	1.3295	-95.535	1.2217	-98.356	0.76123
0.016012	-93.875	1.3142	-95.672	1.2528	-98.378	0.82346
0.016211	-93.928	1.3262	-95.825	1.2597	-98.593	0.88597
0.01641	-94.141	1.3289	-95.915	1.2654	-98.728	0.95246
0.016609	-94.194	1.3727	-95.987	1.256	-98.871	1.0125
0.016809	-94.31	1.3813	-96.083	1.2526	-99.012	1.0729
0.017008	-94.456	1.3944	-96.101	1.2239	-99.211	1.0786
0.017207	-94.699	1.3988	-96.156	1.2305	-99.28	1.0605
0.017406	-94.878	1.4073	-96.203	1.2679	-99.445	1.0438
0.017606	-95.006	1.4119	-96.264	1.2669	-99.54	1.0456
0.017805	-95.192	1.422	-96.289	1.2924	-99.587	1.0626
0.018004	-95.398	1.4113	-96.327	1.3313	-99.656	1.0626
0.018204	-95.457	1.3837	-96.392	1.3421	-99.699	1.0803
0.018403	-95.529	1.3961	-96.502	1.3548	-99.74	1.0985
0.018602	-95.637	1.4054	-96.565	1.3635	-99.81	1.1321
0.018801	-95.712	1.4072	-96.634	1.3821	-99.859	1.1744
0.019001	-95.894	1.4139	-96.664	1.4272	-99.915	1.1942
0.0192	-95.996	1.3952	-96.727	1.4298	-99.948	1.2273
0.019399	-96.139	1.3901	-96.772	1.4297	-100.03	1.2643
0.019598	-96.255	1.399	-96.798	1.4119	-100.08	1.2943
0.019798	-96.355	1.4138	-96.833	1.442	-100.15	1.3598
0.019997	-96.536	1.4261	-96.875	1.4428	-100.22	1.3803
0.020196	-96.585	1.4512	-96.908	1.4423	-100.29	1.4054
0.020396	-96.696	1.462	-96.937	1.4522	-100.36	1.4116
0.020595	-96.934	1.4694	-97.023	1.502	-100.52	1.4753
0.020794	-96.962	1.477	-97.161	1.5475	-100.55	1.4888
0.020993	-97.055	1.4912	-97.213	1.5895	-100.6	1.5333
0.021193	-97.144	1.4873	-97.276	1.631	-100.73	1.5853
0.021392	-97.144	1.4728	-97.337	1.6719	-100.84	1.6606
0.021591	-97.153	1.464	-97.477	1.6799	-100.88	1.714
0.02179	-97.162	1.4492	-97.59	1.7398	-100.98	1.748
0.02199	-97.197	1.4432	-97.67	1.785	-101.05	1.7683
0.022189	-97.223	1.4692	-97.714	1.8024	-101.11	1.7915
0.022388	-97.275	1.472	-97.772	1.8642	-101.18	1.8089
0.022588	-97.281	1.4984	-97.805	1.889	-101.23	1.8507
0.022787	-97.29	1.5216	-97.839	1.9002	-101.31	1.8968
0.022986	-97.342	1.5294	-98.066	1.9686	-101.47	1.9397
0.023185	-97.409	1.5523	-98.143	1.9813	-101.63	1.9619
0.023385	-97.485	1.5423	-98.259	2.0086	-101.68	1.8898
0.023584	-97.542	1.5558	-98.292	2.0177	-101.68	1.8717
0.023783	-97.659	1.5842	-98.367	2.0547	-101.68	1.8495
0.023982	-97.717	1.571	-98.445	2.0883	-101.69	1.803
0.024182	-97.772	1.5724	-98.5	2.0954	-101.69	1.7283
0.024381	-97.855	1.6103	-98.559	2.13	-101.71	1.6932
0.02458	-97.937	1.6078	-98.593	2.1472	-101.73	1.6771
0.02478	-98.061	1.6084	-98.66	2.1582	-101.73	1.6416
0.024979	-98.164	1.59	-98.722	2.1828	-101.73	1.6241
0.025178	-98.329	1.5952	-98.75	2.2182	-101.69	1.5643
0.025377	-98.413	1.6016	-98.788	2.2363	-101.67	1.5083
0.025577	-98.477	1.6243	-98.794	2.2254	-101.64	1.4286
0.025776	-98.578	1.6212	-98.805	2.2168	-101.62	1.3401
0.025975	-98.648	1.6168	-98.841	2.1978	-101.62	1.2968
0.026174	-98.849	1.6042	-98.87	2.1944	-101.61	1.2309
0.026374	-98.901	1.5978	-98.895	2.1688	-101.61	1.142
0.026573	-98.944	1.6026	-98.95	2.157	-101.61	1.0923
0.026772	-99.002	1.5902	-99.043	2.1274	-101.61	1.082
0.026972	-99.045	1.5899	-99.109	2.071	-101.61	1.061
0.027171	-99.116	1.595	-99.206	2.036	-101.66	1.0561
0.02737	-99.266	1.6125	-99.275	2.0442	-101.71	1.048
0.027569	-99.332	1.6222	-99.301	2.034	-101.78	1.0558
0.027769	-99.402	1.6223	-99.318	2.0306	-101.9	1.1026
0.027968	-99.42	1.6228	-99.327	2.0181	-101.94	1.1207
0.028167	-99.522	1.6307	-99.345	2.0153	-102.02	1.1679
0.028366	-99.541	1.6323	-99.365	2.0075	-102.12	1.254
0.028566	-99.574	1.6255	-99.423	2.0064	-102.2	1.304
0.028765	-99.635	1.63	-99.447	2.0047	-102.35	1.3588
0.028964	-99.663	1.6301	-99.459	2.0297	-102.41	1.4038
0.029164	-99.76	1.6394	-99.495	2.0495	-102.51	1.4641
0.029363	-99.901	1.649	-99.549	2.0721	-102.59	1.5025
0.029562	-99.945	1.6495	-99.569	2.0985	-102.68	1.543
0.029761	-99.988	1.6469	-99.592	2.1041	-102.79	1.5887
0.029961	-99.998	1.6422	-99.611	2.1228	-102.86	1.6325
0.03016	-100.02	1.638	-99.615	2.1404	-102.92	1.6623
0.030359	-100.06	1.6338	-99.644	2.1426	-102.97	1.7141
0.030558	-100.11	1.6391	-99.701	2.152	-103.03	1.7323
0.030758	-100.16	1.6267	-99.717	2.1765	-103.06	1.7462
0.030957	-100.22	1.6211	-99.742	2.1782	-103.14	1.7524
0.031156	-100.28	1.6195	-99.797	2.1985	-103.15	1.7518
0.031356	-100.3	1.6075	-99.861	2.2192	-103.2	1.7662
0.031555	-100.35	1.599	-99.934	2.2359	-103.22	1.7967
0.031754	-100.4	1.5805	-99.972	2.2456	-103.25	1.8026
0.031953	-100.45	1.5632	-99.998	2.2455	-103.25	1.8031
0.032153	-100.46	1.5474	-100.03	2.2311	-103.28	1.8176
0.032352	-100.53	1.5297	-100.16	2.2251	-103.25	1.7981
0.032551	-100.65	1.5219	-100.21	2.226	-103.29	1.7966
0.03275	-100.67	1.5172	-100.25	2.2214	-103.31	1.8029
0.03295	-100.7	1.511	-100.33	2.2133	-103.32	1.8123
0.033149	-100.73	1.4866	-100.34	2.1905	-103.34	1.8043
0.033348	-100.76	1.4815	-100.34	2.1571	-103.35	1.7965
0.033548	-100.78	1.4655	-100.37	2.1248	-103.37	1.8043
0.033747	-100.8	1.4591	-100.4	2.141	-103.48	1.8361
0.033946	-100.84	1.4566	-100.39	2.1248	-103.59	1.8725
0.034145	-100.86	1.4555	-100.41	2.0868	-103.65	1.9007
0.034345	-100.86	1.4808	-100.43	2.0804	-103.75	1.9417
0.034544	-100.93	1.4851	-100.44	2.0548	-103.78	1.9269
0.034743	-101.1	1.4888	-100.49	2.0014	-103.8	1.907
0.034942	-101.14	1.5044	-100.55	1.9941	-103.89	1.921
0.035142	-101.18	1.5076	-100.57	1.9737	-104.03	1.9503
0.035341	-101.22	1.5234	-100.62	1.9763	-104.07	1.9461
0.03554	-101.25	1.5331	-100.61	1.9655	-104.08	1.9614
0.03574	-101.32	1.5391	-100.62	1.9414	-104.13	1.9744
0.035939	-101.37	1.5536	-100.66	1.9196	-104.18	1.9942
0.036138	-101.46	1.5574	-100.74	1.9179	-104.21	2.0646
0.036337	-101.53	1.5617	-100.79	1.9374	-104.25	2.1062
0.036537	-101.6	1.5659	-100.86	1.9073	-104.26	2.1257
0.036736	-101.64	1.5773	-100.88	1.8952	-104.28	2.1804
0.036935	-101.72	1.5868	-100.97	1.889	-104.3	2.1952
0.037134	-101.79	1.5831	-100.99	1.8675	-104.3	2.1908
0.037334	-101.82	1.5725	-101.01	1.8641	-104.34	2.1944
0.037533	-101.86	1.5707	-101.05	1.8509	-104.42	2.2352
0.037732	-101.94	1.5764	-101.08	1.8487	-104.48	2.2548
0.037932	-101.98	1.592	-101.14	1.8394	-104.54	2.2546
0.038131	-102.01	1.602	-101.17	1.8285	-104.58	2.2522
0.03833	-102.09	1.6114	-101.19	1.8463	-104.61	2.2754
0.038529	-102.13	1.6193	-101.16	1.8267	-104.64	2.2541
0.038729	-102.16	1.6367	-101.22	1.8161	-104.69	2.2395
0.038928	-102.21	1.6475	-101.18	1.8015	-104.71	2.2269
0.039127	-102.24	1.6568	-101.27	1.8017	-104.76	2.2375
0.039326	-102.28	1.6637	-101.27	1.774	-104.79	2.2818
0.039526	-102.3	1.6861	-101.27	1.7601	-104.82	2.4309
0.039725	-102.35	1.7178	-101.3	1.7271	-104.84	2.5062
0.039924	-102.4	1.7206	-101.3	1.7264	-104.9	2.6518
0.040124	-102.44	1.729	-101.27	1.6823	-104.97	2.7354
0.040323	-102.49	1.7373	-101.31	1.662	-105.01	2.7907
0.040522	-102.57	1.7658	-101.3	1.6408	-105.05	2.8028
0.040721	-102.61	1.7652	-101.3	1.6256	-105.05	2.8201
0.040921	-102.61	1.7756	-101.35	1.6131	-105.05	2.833
0.04112	-102.62	1.78	-101.31	1.6053	-104.97	2.8174
0.041319	-102.63	1.7779	-101.34	1.5922	-104.95	2.8225
0.041518	-102.65	1.7795	-101.34	1.5931	-104.9	2.8189
0.041718	-102.68	1.78	-101.37	1.5913	-104.86	2.8092
0.041917	-102.69	1.798	-101.38	1.5781	-104.7	2.7965
0.042116	-102.73	1.8089	-101.38	1.595	-104.37	2.7704
0.042316	-102.74	1.8223	-101.37	1.5787	-104.16	2.7606
0.042515	-102.76	1.8349	-101.38	1.5645	-104	2.751
0.042714	-102.79	1.8427	-101.37	1.562	-103.88	2.7326
0.042913	-102.85	1.8575	-101.37	1.5562	-103.87	2.7499
0.043113	-102.95	1.8674	-101.37	1.5396	-103.87	2.7553
0.043312	-103	1.8755	-101.36	1.5649	-103.83	2.7532
0.043511	-103.03	1.8814	-101.37	1.5706	-103.83	2.7498
0.04371	-103.1	1.8839	-101.38	1.577	-103.83	2.7604
0.04391	-103.12	1.8881	-101.36	1.5946	-103.83	2.7622
0.044109	-103.16	1.8921	-101.38	1.5985	-103.84	2.7616
0.044308	-103.18	1.9005	-101.36	1.606	-103.95	2.771
0.044508	-103.2	1.9193	-101.35	1.6284	-103.98	2.7545
0.044707	-103.25	1.9222	-101.37	1.6306	-104.02	2.738
0.044906	-103.27	1.9218	-101.35	1.6372	-104.08	2.7429
0.045105	-103.35	1.9234	-101.34	1.6567	-104.1	2.7173
0.045305	-103.4	1.9246	-101.35	1.6587	-104.14	2.7131
0.045504	-103.46	1.9237	-101.31	1.6682	-104.2	2.6862
0.045703	-103.49	1.9248	-101.35	1.6794	-104.26	2.6591
0.045902	-103.54	1.9291	-101.39	1.6773	-104.32	2.5828
0.046102	-103.56	1.935	-101.35	1.6871	-104.45	2.558
0.046301	-103.6	1.9387	-101.41	1.6912	-104.53	2.5211
0.0465	-103.66	1.9403	-101.4	1.6824	-104.57	2.4844
0.0467	-103.73	1.9434	-101.41	1.6834	-104.57	2.4888
0.046899	-103.8	1.9499	-101.44	1.6727	-104.6	2.4729
0.047098	-103.85	1.9598	-101.45	1.6495	-104.61	2.4687
0.047297	-103.87	1.9708	-101.48	1.6299	-104.64	2.4359
0.047497	-103.89	1.9805	-101.53	1.607	-104.66	2.3998
0.047696	-103.93	1.9939	-101.54	1.5975	-104.67	2.3655
0.047895	-103.95	2.0132	-101.55	1.5723	-104.69	2.3575
0.048094	-103.99	2.0516	-101.64	1.5523	-104.72	2.3337
0.048294	-104.02	2.0852	-101.63	1.557	-104.73	2.3433
0.048493	-104.04	2.109	-101.66	1.5037	-104.73	2.3522
0.048692	-104.09	2.1151	-101.68	1.4667	-104.73	2.3495
0.048892	-104.12	2.1268	-101.67	1.4595	-104.73	2.3295
0.049091	-104.15	2.1391	-101.66	1.4503	-104.71	2.319
0.04929	-104.24	2.1512	-101.64	1.4383	-104.72	2.3279
0.049489	-104.29	2.1624	-101.58	1.4334	-104.67	2.3319
0.049689	-104.36	2.1793	-101.67	1.4352	-104.66	2.3083
0.049888	-104.37	2.1892	-101.67	1.4409	-104.63	2.2724
0.050087	-104.37	2.1988	-101.66	1.4413	-104.61	2.2573
0.050286	-104.39	2.2086	-101.68	1.4422	-104.58	2.2284
0.050486	-104.41	2.2124	-101.67	1.4445	-104.5	2.2146
0.050685	-104.42	2.2124	-101.67	1.4723	-104.47	2.1639
0.050884	-104.43	2.2155	-101.69	1.4754	-104.43	2.1114
0.051084	-104.46	2.2026	-101.62	1.4803	-104.39	2.0469
0.051283	-104.48	2.1952	-101.62	1.5035	-104.31	1.945
0.051482	-104.49	2.1905	-101.62	1.5093	-104.28	1.9216
0.051681	-104.51	2.1862	-101.61	1.5224	-104.27	1.8912
0.051881	-104.53	2.1792	-101.62	1.5542	-104.27	1.8575
0.05208	-104.57	2.1729	-101.62	1.5616	-104.27	1.8436
0.052279	-104.58	2.17	-101.62	1.5609	-104.27	1.8376
0.052478	-104.61	2.1753	-101.66	1.5523	-104.25	1.825
0.052678	-104.63	2.1776	-101.67	1.5635	-104.25	1.8264
0.052877	-104.65	2.1829	-101.69	1.5499	-104.3	1.8265
0.053076	-104.67	2.1814	-101.74	1.5496	-104.42	1.8283
0.053276	-104.68	2.1855	-101.74	1.5472	-104.42	1.8344
0.053475	-104.7	2.1951	-101.76	1.5348	-104.47	1.8529
0.053674	-104.73	2.1962	-101.78	1.5357	-104.47	1.8543
0.053873	-104.76	2.2003	-101.77	1.5315	-104.48	1.837
0.054073	-104.78	2.2075	-101.8	1.5136	-104.48	1.838
0.054272	-104.81	2.1622	-101.79	1.5063	-104.45	1.8376
0.054471	-104.88	2.1645	-101.74	1.4808	-104.45	1.8209
0.05467	-104.92	2.1711	-101.8	1.4657	-104.43	1.8549
0.05487	-104.94	2.1772	-101.75	1.4833	-104.42	1.8866
0.055069	-104.96	2.183	-101.73	1.4573	-104.41	1.8879
0.055268	-104.98	2.1832	-101.72	1.4542	-104.41	1.8866
0.055468	-104.99	2.1833	-101.66	1.4796	-104.41	1.8988
0.055667	-105	2.1982	-101.67	1.4805	-104.43	1.9193
0.055866	-105	2.2128	-101.66	1.4865	-104.45	1.9325
0.056065	-104.98	2.2127	-101.64	1.4921	-104.47	1.9398
0.056265	-104.95	2.2115	-101.68	1.4962	-104.5	1.9541
0.056464	-104.87	2.2068	-101.66	1.5008	-104.59	1.9583
0.056663	-104.64	2.1833	-101.66	1.5138	-104.67	1.9538
0.056862	-104.38	2.1715	-101.68	1.5327	-104.72	1.952
0.057062	-104.32	2.1626	-101.67	1.536	-104.76	1.9388
0.057261	-104.3	2.155	-101.69	1.5474	-104.76	1.9264
0.05746	-104.28	2.1464	-101.74	1.5519	-104.76	1.9192
0.05766	-104.28	2.1353	-101.74	1.5749	-104.79	1.9427
0.057859	-104.25	2.1022	-101.75	1.5909	-104.8	1.9238
0.058058	-104.24	2.0784	-101.76	1.5911	-104.81	1.9005
0.058257	-104.23	2.0564	-101.74	1.6478	-104.85	1.841
0.058457	-104.22	2.0498	-101.77	1.6797	-104.87	1.8066
0.058656	-104.17	2.0458	-101.75	1.7348	-104.9	1.8025
0.058855	-104.16	2.0374	-101.71	1.7394	-104.93	1.7906
0.059054	-104.13	2.0361	-101.72	1.728	-104.94	1.7795
0.059254	-104.12	2.0322	-101.71	1.7457	-104.93	1.7829
0.059453	-104.14	2.037	-101.68	1.7587	-104.96	1.7889
0.059652	-104.13	2.0453	-101.68	1.7618	-104.98	1.7816
0.059852	-104.14	2.0545	-101.62	1.7542	-105	1.7705
0.060051	-104.13	2.0637	-101.61	1.7495	-105.01	1.7575
0.06025	-104.14	2.065	-101.61	1.7499	-105.04	1.7405
0.060449	-104.15	2.0602	-101.6	1.7545	-105.04	1.733
0.060649	-104.15	2.0534	-101.62	1.7597	-105.05	1.7275
0.060848	-104.15	2.048	-101.6	1.7686	-105.08	1.7104
0.061047	-104.16	2.0439	-101.59	1.7678	-105.09	1.6988
0.061246	-104.17	2.0406	-101.63	1.7687	-105.15	1.699
0.061446	-104.17	2.036	-101.62	1.779	-105.16	1.681
0.061645	-104.16	2.0298	-101.58	1.7818	-105.26	1.6842
0.061844	-104.18	2.0283	-101.63	1.8013	-105.28	1.6984
0.062044	-104.2	2.0222	-101.61	1.8269	-105.28	1.7091
0.062243	-104.2	2.0126	-101.64	1.8462	-105.28	1.7077
0.062442	-104.21	2.0104	-101.66	1.8553	-105.28	1.7076
0.062641	-104.23	2.0132	-101.66	1.8736	-105.28	1.7008
0.062841	-104.26	2.013	-101.68	1.8772	-105.25	1.6948
0.06304	-104.28	2.0174	-101.68	1.8777	-105.2	1.6884
0.063239	-104.31	2.0177	-101.67	1.8835	-105.12	1.6689
0.063438	-104.32	2.0166	-101.67	1.8787	-104.95	1.6495
0.063638	-104.34	2.0147	-101.66	1.8792	-104.92	1.6464
0.063837	-104.36	2.0149	-101.65	1.8915	-104.89	1.6576
0.064036	-104.41	2.0156	-101.68	1.8785	-104.88	1.6771
0.064236	-104.44	2.0168	-101.67	1.8839	-104.88	1.6962
0.064435	-104.45	2.011	-101.66	1.8638	-104.88	1.7014
0.064634	-104.48	1.9981	-101.68	1.8507	-104.88	1.7165
0.064833	-104.5	1.9757	-101.66	1.8411	-104.95	1.789
0.065033	-104.52	1.9536	-101.66	1.8101	-105.05	1.8653
0.065232	-104.54	1.9289	-101.65	1.7608	-105.09	1.9125
0.065431	-104.59	1.923	-101.61	1.7432	-105.14	1.947
0.06563	-104.61	1.9234	-101.62	1.7124	-105.14	2.0629
0.06583	-104.61	1.9232	-101.61	1.6974	-105.14	2.1394
0.066029	-104.63	1.923	-101.61	1.6852	-105.14	2.1506
0.066228	-104.66	1.9276	-101.62	1.6541	-105.14	2.1715
0.066428	-104.67	1.9285	-101.62	1.6326	-105.14	2.1673
0.066627	-104.7	1.9357	-101.62	1.6043	-105.06	2.1756
0.066826	-104.73	1.9432	-101.65	1.5865	-104.97	2.1775
0.067025	-104.76	1.9692	-101.64	1.5728	-104.89	2.167
0.067225	-104.78	1.9931	-101.65	1.5409	-104.82	2.1527
0.067424	-104.8	2.0219	-101.64	1.5115	-104.8	2.1368
0.067623	-104.82	2.0305	-101.58	1.4944	-104.79	2.1128
0.067822	-104.86	2.0349	-101.57	1.4713	-104.79	2.079
0.068022	-104.88	2.0401	-101.55	1.4621	-104.78	2.0443
0.068221	-104.9	2.0528	-101.52	1.4516	-104.8	2.0193
0.06842	-104.91	2.0611	-101.55	1.4358	-104.81	1.998
0.06862	-104.95	2.0674	-101.5	1.4243	-104.84	1.9538
0.068819	-104.97	2.0648	-101.43	1.4253	-104.87	1.9079
0.069018	-104.99	2.0628	-101.47	1.4102	-104.89	1.8789
0.069217	-104.99	2.0569	-101.42	1.4023	-104.91	1.8642
0.069417	-105	2.0609	-101.42	1.3808	-104.96	1.8581
0.069616	-105	2.0497	-101.44	1.3477	-104.99	1.8428
0.069815	-105.01	2.0462	-101.41	1.3342	-105.06	1.8099
0.070014	-105.01	2.0306	-101.4	1.3162	-105.1	1.7845
0.070214	-105.01	2.0307	-101.42	1.3211	-105.14	1.7704
0.070413	-105.01	2.0272	-101.41	1.3171	-105.15	1.7563
0.070612	-104.99	2.0211	-101.41	1.2995	-105.19	1.738
0.070812	-104.99	2.0223	-101.42	1.3084	-105.22	1.729
0.071011	-104.99	2.022	-101.39	1.3117	-105.27	1.6998
0.07121	-104.99	2.0214	-101.44	1.2935	-105.29	1.6709
0.071409	-104.99	2.0156	-101.42	1.2913	-105.3	1.6288
0.071609	-105.01	2.0095	-101.41	1.2983	-105.3	1.6238
0.071808	-105.02	2.0015	-101.45	1.3125	-105.3	1.5922
0.072007	-105.03	1.9926	-101.43	1.307	-105.32	1.5495
0.072206	-105.04	1.9941	-101.45	1.2929	-105.35	1.5485
0.072406	-105.06	1.9951	-101.46	1.2805	-105.35	1.5475
0.072605	-105.07	1.9989	-101.45	1.2846	-105.37	1.5623
0.072804	-105.09	2.0045	-101.46	1.28	-105.39	1.5616
0.073004	-105.09	2.006	-101.45	1.2742	-105.49	1.6465
0.073203	-105.09	2.0043	-101.43	1.2859	-105.5	1.7032
0.073402	-105.09	2.0114	-101.45	1.2823	-105.51	1.7819
0.073601	-105.08	2.0262	-101.42	1.2863	-105.54	1.7968
0.073801	-105.07	2.0475	-101.38	1.2963	-105.49	1.8535
0.074	-105.08	2.058	-101.39	1.2895	-105.44	1.8729
0.074199	-105.09	2.0597	-101.37	1.2967	-105.42	1.8836
0.074398	-105.08	2.0601	-101.36	1.2978	-105.42	1.898
0.074598	-105.08	2.0608	-101.36	1.2764	-105.42	1.9058
0.074797	-105.05	2.0615	-101.32	1.2898	-105.42	1.9266
0.074996	-105.05	2.0632	-101.35	1.2837	-105.42	1.9327
0.075196	-105.04	2.0639	-101.35	1.288	-105.44	1.9026
0.075395	-105.06	2.0568	-101.29	1.2905	-105.47	1.8834
0.075594	-105.07	2.0526	-101.24	1.2702	-105.51	1.881
0.075793	-105.07	2.0429	-101.19	1.2638	-105.5	1.8605
0.075993	-105.07	2.0353	-101.07	1.2605	-105.46	1.8555
0.076192	-105.07	2.0211	-101.08	1.247	-105.45	1.8382
0.076391	-105.05	2.0272	-101.04	1.2418	-105.42	1.8061
0.07659	-105.02	2.0341	-101.02	1.2227	-105.42	1.7798
0.07679	-105	2.0387	-101.01	1.2126	-105.36	1.7596
0.076989	-104.98	2.0403	-101	1.2173	-105.3	1.7339
0.077188	-104.97	2.0417	-100.95	1.1994	-105.28	1.7195
0.077388	-104.96	2.0437	-100.93	1.1987	-105.26	1.7114
0.077587	-104.96	2.0469	-100.85	1.1924	-105.19	1.6832
0.077786	-104.95	2.0471	-100.88	1.1697	-105.17	1.6683
0.077985	-104.95	2.0459	-100.84	1.1965	-105.17	1.6528
0.078185	-104.95	2.051	-100.8	1.186	-105.16	1.6482
0.078384	-104.94	2.046	-100.82	1.1673	-105.16	1.6464
0.078583	-104.95	2.0322	-100.82	1.1661	-105.16	1.6472
0.078782	-104.97	2.0101	-100.8	1.1692	-105.16	1.6218
0.078982	-104.97	1.9854	-100.83	1.1609	-105.18	1.5994
0.079181	-104.96	1.9805	-100.78	1.1677	-105.23	1.5814
0.07938	-104.95	1.9695	-100.81	1.1626	-105.31	1.563
0.07958	-104.95	1.9687	-100.85	1.1517	-105.36	1.567
0.079779	-104.92	1.965	-100.83	1.1574	-105.38	1.547
0.079978	-104.89	1.9683	-100.86	1.1378	-105.44	1.5484
0.080177	-104.86	1.9655	-100.86	1.1274	-105.48	1.534
0.080377	-104.82	1.9615	-100.84	1.1327	-105.5	1.5253
0.080576	-104.75	1.957	-100.86	1.1196	-105.51	1.4796
0.080775	-104.73	1.9536	-100.88	1.1108	-105.51	1.44
0.080974	-104.71	1.9513	-100.88	1.1108	-105.52	1.3901
0.081174	-104.7	1.9515	-100.9	1.1039	-105.52	1.32
0.081373	-104.69	1.9312	-100.9	1.1162	-105.54	1.3196
0.081572	-104.69	1.9007	-100.93	1.1032	-105.56	1.3246
0.081772	-104.68	1.8594	-101	1.0913	-105.56	1.3352
0.081971	-104.68	1.8506	-101	1.0891	-105.57	1.3423
0.08217	-104.68	1.8614	-101.04	1.0624	-105.57	1.3628
0.082369	-104.69	1.8588	-101.07	1.0555	-105.57	1.4096
0.082569	-104.69	1.856	-101.05	1.0597	-105.58	1.4663
0.082768	-104.7	1.8541	-101.13	1.0363	-105.59	1.5438
0.082967	-104.7	1.8541	-101.17	1.0098	-105.6	1.6907
0.083166	-104.72	1.8389	-101.18	1.0129	-105.61	1.7684
0.083366	-104.72	1.8299	-101.2	0.98987	-105.61	1.798
0.083565	-104.72	1.8246	-101.21	0.97452	-105.6	1.8076
0.083764	-104.73	1.8199	-101.23	0.95933	-105.59	1.8331
0.083964	-104.75	1.816	-101.27	0.95213	-105.56	1.834
0.084163	-104.77	1.8135	-101.25	0.9356	-105.55	1.8737
0.084362	-104.8	1.8097	-101.27	0.9069	-105.52	1.8904
0.084561	-104.8	1.8028	-101.29	0.89447	-105.47	1.876
0.084761	-104.8	1.7989	-101.27	0.88356	-105.39	1.8452
0.08496	-104.79	1.7889	-101.29	0.87611	-105.3	1.8179
0.085159	-104.78	1.7901	-101.31	0.86979	-105.21	1.7934
0.085358	-104.76	1.7827	-101.3	0.85971	-105.16	1.7749
0.085558	-104.75	1.7773	-101.33	0.85565	-105.13	1.7568
0.085757	-104.72	1.7741	-101.34	0.86782	-105.12	1.7268
0.085956	-104.71	1.7657	-101.33	0.87103	-105.12	1.6768
0.086156	-104.69	1.7622	-101.33	0.87179	-105.12	1.6575
0.086355	-104.67	1.7586	-101.29	0.88701	-105.12	1.6287
0.086554	-104.65	1.7531	-101.27	0.88426	-105.11	1.6017
0.086753	-104.64	1.7523	-101.28	0.88855	-105.12	1.5607
0.086953	-104.65	1.7489	-101.25	0.9081	-105.12	1.5354
0.087152	-104.67	1.7451	-101.25	0.9163	-105.12	1.5177
0.087351	-104.7	1.7421	-101.24	0.91672	-105.13	1.4211
0.08755	-104.71	1.701	-101.21	0.92741	-105.15	1.3796
0.08775	-104.71	1.6767	-101.23	0.92412	-105.18	1.3587
0.087949	-104.73	1.6594	-101.21	0.94262	-105.18	1.3593
0.088148	-104.74	1.6562	-101.19	0.93003	-105.19	1.3338
0.088348	-104.74	1.6547	-101.21	0.92042	-105.2	1.33
0.088547	-104.72	1.6534	-101.19	0.91916	-105.2	1.3122
0.088746	-104.71	1.6537	-101.2	0.9138	-105.2	1.3655
0.088945	-104.69	1.6497	-101.23	0.91767	-105.21	1.5625
0.089145	-104.67	1.6473	-101.2	0.91991	-105.22	1.6283
0.089344	-104.67	1.6529	-101.24	0.90841	-105.24	1.6816
0.089543	-104.67	1.6702	-101.29	0.89534	-105.26	1.7011
0.089742	-104.67	1.679	-101.27	0.90758	-105.27	1.7303
0.089942	-104.67	1.6854	-101.27	0.89484	-105.3	1.739
0.090141	-104.68	1.6935	-101.27	0.89505	-105.32	1.7467
0.09034	-104.7	1.6957	-101.29	0.88062	-105.35	1.752
0.09054	-104.7	1.6975	-101.34	0.88531	-105.38	1.7484
0.090739	-104.75	1.6996	-101.33	0.89426	-105.41	1.7503
0.090938	-104.83	1.7053	-101.36	0.87807	-105.37	1.7396
0.091137	-104.92	1.7106	-101.42	0.87292	-105.29	1.7144
0.091337	-104.96	1.7205	-101.41	0.87103	-105.26	1.7063
0.091536	-105.03	1.7317	-101.43	0.86646	-105.26	1.6994
0.091735	-105.05	1.7504	-101.44	0.85865	-105.24	1.6836
0.091934	-105.04	1.7752	-101.42	0.8693	-105.21	1.6558
0.092134	-105.05	1.775	-101.44	0.87095	-105.19	1.6403
0.092333	-105.05	1.7724	-101.45	0.8773	-105.16	1.6239
0.092532	-105.06	1.7735	-101.45	0.88432	-105.12	1.6161
0.092732	-105.05	1.7754	-101.51	0.89436	-105.08	1.586
0.092931	-105.03	1.7766	-101.46	0.89192	-105.08	1.5484
0.09313	-105.01	1.7796	-101.44	0.88508	-105.02	1.5119
0.093329	-104.99	1.7836	-101.53	0.89282	-105	1.4629
0.093529	-104.97	1.7913	-101.48	0.91088	-104.98	1.3943
0.093728	-104.97	1.7941	-101.49	0.93006	-104.96	1.3836
0.093927	-104.89	1.7955	-101.52	0.91605	-104.88	1.3759
0.094126	-104.86	1.8002	-101.48	0.94368	-104.84	1.3748
0.094326	-104.84	1.8014	-101.54	0.95899	-104.83	1.3568
0.094525	-104.81	1.8084	-101.52	0.95738	-104.82	1.3388
0.094724	-104.75	1.8226	-101.5	0.96678	-104.82	1.3455
0.094924	-104.7	1.8439	-101.53	0.96692	-104.81	1.3609
0.095123	-104.7	1.8491	-101.51	0.97583	-104.81	1.3899
0.095322	-104.69	1.8397	-101.53	1.003	-104.81	1.4012
0.095521	-104.68	1.8421	-101.54	1.0295	-104.83	1.5048
0.095721	-104.66	1.84	-101.53	1.0556	-104.86	1.5263
0.09592	-104.65	1.8381	-101.56	1.0663	-104.91	1.5417
0.096119	-104.62	1.81	-101.57	1.0761	-104.92	1.5391
0.096318	-104.6	1.7859	-101.57	1.0817	-104.94	1.5382
0.096518	-104.59	1.7798	-101.57	1.0695	-104.97	1.5235
0.096717	-104.57	1.7724	-101.56	1.0774	-105	1.538
0.096916	-104.54	1.7676	-101.55	1.0779	-105.04	1.6439
0.097116	-104.43	1.7639	-101.59	1.0646	-105.07	1.6922
0.097315	-104.4	1.7593	-101.59	1.0715	-105.1	1.718
0.097514	-104.39	1.7555	-101.56	1.11	-105.15	1.7337
0.097713	-104.32	1.7548	-101.53	1.1191	-105.2	1.7436
0.097913	-104.31	1.7469	-101.52	1.1331	-105.2	1.7435
0.098112	-104.3	1.7425	-101.52	1.1371	-105.2	1.7415
0.098311	-104.3	1.7283	-101.51	1.1407	-105.2	1.7483
0.09851	-104.31	1.7123	-101.5	1.1342	-105.15	1.7421
0.09871	-104.32	1.7122	-101.51	1.1332	-105.15	1.7957
0.098909	-104.33	1.7152	-101.52	1.1531	-105.13	1.7981
0.099108	-104.38	1.7183	-101.51	1.1711	-105.07	1.7794
0.099308	-104.39	1.7227	-101.55	1.1725	-104.9	1.7537
0.099507	-104.41	1.7232	-101.52	1.1863	-104.75	1.7228
0.099706	-104.43	1.7224	-101.52	1.1772	-104.62	1.6867
0.099905	-104.44	1.7311	-101.55	1.172	-104.29	1.6383
0.1001	-104.45	1.7355	-101.55	1.1553	-104.26	1.6002
0.1003	-104.46	1.7608	-101.52	1.1551	-104.16	1.5378
0.1005	-104.48	1.7658	-101.53	1.1462	-104.16	1.5089
0.1007	-104.49	1.7463	-101.5	1.1362	-104.16	1.4594
0.1009	-104.51	1.7535	-101.51	1.1283	-104.16	1.4174
0.1011	-104.52	1.7599	-101.49	1.1317	-104.16	1.3821
0.1013	-104.54	1.7637	-101.46	1.1338	-104.16	1.3284
0.1015	-104.58	1.7657	-101.47	1.1262	-104.22	1.3396
0.1017	-104.59	1.7681	-101.46	1.1228	-104.27	1.3544
0.1019	-104.6	1.7687	-101.42	1.112	-104.29	1.363
0.1021	-104.61	1.774	-101.4	1.1111	-104.3	1.3648
0.1023	-104.62	1.7776	-101.38	1.1077	-104.33	1.3681
0.1025	-104.61	1.7797	-101.38	1.1126	-104.36	1.3981
0.1027	-104.6	1.7754	-101.39	1.1068	-104.32	1.4102
0.10289	-104.6	1.7725	-101.32	1.1221	-104.32	1.4188
0.10309	-104.59	1.7706	-101.35	1.1233	-104.31	1.4233
0.10329	-104.59	1.7697	-101.39	1.1248	-104.3	1.4259
0.10349	-104.6	1.7364	-101.33	1.1266	-104.22	1.3957
0.10369	-104.58	1.7238	-101.39	1.1348	-104.15	1.369
0.10389	-104.54	1.717	-101.37	1.1538	-104.03	1.3533
0.10409	-104.52	1.7157	-101.31	1.1569	-103.91	1.3504
0.10429	-104.51	1.7155	-101.37	1.1819	-103.86	1.3564
0.10449	-104.51	1.7133	-101.36	1.2034	-103.83	1.3356
0.10469	-104.51	1.7151	-101.36	1.2147	-103.8	1.3293
0.10489	-104.51	1.7178	-101.4	1.2386	-103.77	1.3411
0.10509	-104.52	1.7217	-101.36	1.2612	-103.77	1.3364
0.10529	-104.52	1.7324	-101.4	1.2874	-103.76	1.3977
0.10548	-104.52	1.7486	-101.44	1.3038	-103.71	1.4813
0.10568	-104.52	1.7588	-101.4	1.3191	-103.71	1.4774
0.10588	-104.52	1.7642	-101.43	1.3491	-103.71	1.4765
0.10608	-104.52	1.7657	-101.41	1.3514	-103.71	1.5163
0.10628	-104.53	1.7663	-101.41	1.3628	-103.7	1.5889
0.10648	-104.53	1.7649	-101.45	1.3724	-103.7	1.6254
0.10668	-104.53	1.7609	-101.45	1.3751	-103.7	1.6681
0.10688	-104.52	1.7583	-101.47	1.3805	-103.71	1.7337
0.10708	-104.52	1.7496	-101.55	1.3984	-103.76	1.7571
0.10728	-104.52	1.7444	-101.49	1.3918	-103.79	1.7821
0.10748	-104.52	1.734	-101.57	1.3802	-103.81	1.8076
0.10768	-104.51	1.7266	-101.59	1.3794	-103.83	1.8178
0.10788	-104.5	1.716	-101.56	1.3967	-103.85	1.8333
0.10808	-104.49	1.7109	-101.57	1.3949	-103.9	1.8493
0.10827	-104.44	1.7131	-101.59	1.3871	-103.92	1.8386
0.10847	-104.43	1.7301	-101.6	1.3872	-103.94	1.8451
0.10867	-104.41	1.7657	-101.6	1.3673	-103.95	1.8379
0.10887	-104.36	1.7788	-101.5	1.3699	-103.97	1.8334
0.10907	-104.35	1.7866	-101.42	1.3683	-103.98	1.7901
0.10927	-104.31	1.7843	-101.39	1.3368	-103.99	1.7557
0.10947	-104.25	1.7809	-101.33	1.3376	-104.01	1.7457
0.10967	-104.21	1.7406	-101.26	1.338	-104.03	1.706
0.10987	-104.19	1.6962	-101.26	1.3508	-104.05	1.6914
0.11007	-104.18	1.6414	-101.24	1.3787	-104.09	1.6875
0.11027	-104.16	1.6463	-101.22	1.3543	-104.1	1.6828
0.11047	-104.15	1.6793	-101.22	1.337	-104.12	1.6668
0.11067	-104.14	1.6779	-101.21	1.3339	-104.12	1.667
0.11087	-104.15	1.676	-101.21	1.333	-104.11	1.652
0.11106	-104.17	1.6748	-101.22	1.3381	-104.11	1.6275
0.11126	-104.18	1.6715	-101.2	1.3367	-104.06	1.6071
0.11146	-104.19	1.6702	-101.21	1.3392	-104.02	1.6133
0.11166	-104.19	1.6672	-101.21	1.332	-103.96	1.6117
0.11186	-104.19	1.6516	-101.21	1.3237	-103.94	1.6012
0.11206	-104.21	1.633	-101.25	1.3125	-103.84	1.5904
0.11226	-104.27	1.6168	-101.25	1.3162	-103.81	1.5802
0.11246	-104.28	1.6128	-101.25	1.3177	-103.81	1.5701
0.11266	-104.3	1.6034	-101.3	1.3179	-103.79	1.5517
0.11286	-104.31	1.5947	-101.34	1.3573	-103.78	1.5196
0.11306	-104.32	1.5873	-101.36	1.3661	-103.76	1.4712
0.11326	-104.32	1.5796	-101.38	1.3626	-103.75	1.4693
0.11346	-104.32	1.5749	-101.37	1.3672	-103.74	1.4657
0.11366	-104.32	1.5673	-101.41	1.3813	-103.74	1.4526
0.11385	-104.32	1.5437	-101.42	1.3723	-103.74	1.4096
0.11405	-104.3	1.5298	-101.41	1.3642	-103.74	1.3568
0.11425	-104.3	1.5234	-101.46	1.3497	-103.74	1.3432
0.11445	-104.27	1.5195	-101.44	1.3471	-103.76	1.2794
0.11465	-104.25	1.5092	-101.44	1.3512	-103.76	1.2741
0.11485	-104.24	1.507	-101.5	1.3534	-103.76	1.2594
0.11505	-104.21	1.5051	-101.5	1.3239	-103.76	1.238
0.11525	-104.19	1.5058	-101.52	1.3449	-103.76	1.2371
0.11545	-104.15	1.5122	-101.55	1.3293	-103.76	1.2258
0.11565	-104.03	1.522	-101.54	1.3257	-103.82	1.2144
0.11585	-103.8	1.5243	-101.55	1.3454	-103.83	1.1734
0.11605	-103.75	1.5266	-101.55	1.3179	-103.84	1.1216
0.11625	-103.67	1.5364	-101.54	1.3187	-103.79	1.0741
0.11644	-103.61	1.54	-101.55	1.3179	-103.77	1.0523
0.11664	-103.6	1.5393	-101.57	1.3343	-103.74	1.0461
0.11684	-103.59	1.5344	-101.55	1.314	-103.71	1.0399
0.11704	-103.58	1.5297	-101.57	1.3224	-103.72	1.0315
0.11724	-103.56	1.5296	-101.55	1.3185	-103.73	1.0228
0.11744	-103.54	1.5267	-101.54	1.2999	-103.73	1.0757
0.11764	-103.51	1.5256	-101.54	1.3098	-103.73	1.1538
0.11784	-103.52	1.5233	-101.5	1.2966	-103.76	1.1772
0.11804	-103.52	1.5112	-101.51	1.291	-103.8	1.2041
0.11824	-103.5	1.5099	-101.53	1.2773	-103.81	1.2198
0.11844	-103.51	1.5099	-101.49	1.2666	-103.83	1.2497
0.11864	-103.52	1.5121	-101.47	1.2543	-103.86	1.2725
0.11884	-103.51	1.514	-101.44	1.2414	-103.9	1.305
0.11904	-103.52	1.511	-101.42	1.2332	-103.93	1.3845
0.11923	-103.52	1.5074	-101.44	1.2346	-103.99	1.4205
0.11943	-103.5	1.5013	-101.43	1.23	-104.1	1.4624
0.11963	-103.5	1.4969	-101.42	1.2307	-104.18	1.4866
0.11983	-103.49	1.4971	-101.43	1.2236	-104.22	1.4991
0.12003	-103.5	1.4802	-101.42	1.2084	-104.26	1.5086
0.12023	-103.5	1.4386	-101.42	1.2117	-104.29	1.5169
0.12043	-103.5	1.418	-101.42	1.2145	-104.33	1.5094
0.12063	-103.5	1.4161	-101.4	1.2044	-104.38	1.5106
0.12083	-103.52	1.4183	-101.42	1.216	-104.42	1.5093
0.12103	-103.54	1.425	-101.42	1.2282	-104.47	1.5156
0.12123	-103.56	1.4361	-101.42	1.2289	-104.51	1.5135
0.12143	-103.56	1.4506	-101.46	1.229	-104.58	1.5019
0.12163	-103.56	1.4755	-101.48	1.2255	-104.6	1.4865
0.12183	-103.57	1.5062	-101.48	1.2159	-104.62	1.4404
0.12202	-103.6	1.5087	-101.51	1.2224	-104.62	1.4147
0.12222	-103.6	1.5081	-101.49	1.2221	-104.58	1.3815
0.12242	-103.61	1.5122	-101.5	1.2205	-104.56	1.336
0.12262	-103.39	1.5174	-101.51	1.2172	-104.5	1.2651
0.12282	-103.1	1.5138	-101.51	1.2167	-104.48	1.2056
0.12302	-103.02	1.5157	-101.53	1.2242	-104.47	1.1176
0.12322	-102.95	1.5119	-101.55	1.211	-104.44	1.0199
0.12342	-102.94	1.5094	-101.53	1.1968	-104.41	0.97013
0.12362	-102.94	1.5038	-101.55	1.1889	-104.39	0.92903
0.12382	-102.93	1.4973	-101.55	1.2167	-104.38	0.90029
0.12402	-102.91	1.4922	-101.53	1.2122	-104.38	0.87099
0.12422	-102.89	1.4932	-101.58	1.2337	-104.37	0.83888
0.12442	-102.88	1.4837	-101.55	1.2438	-104.34	0.78313
0.12462	-102.85	1.4586	-101.58	1.2753	-104.28	0.77281
0.12481	-102.83	1.452	-101.59	1.3002	-104.13	0.77651
0.12501	-102.8	1.4412	-101.57	1.3355	-103.99	0.77904
0.12521	-102.73	1.4255	-101.55	1.4337	-103.89	0.78839
0.12541	-102.69	1.4173	-101.55	1.4712	-103.86	0.7924
0.12561	-102.75	1.4108	-101.47	1.5084	-103.73	0.82648
0.12581	-102.81	1.4033	-101.52	1.5655	-103.71	0.86163
0.12601	-102.98	1.397	-101.47	1.5762	-103.77	0.87964
0.12621	-103.03	1.391	-101.45	1.5996	-103.87	0.89898
0.12641	-103.06	1.3926	-101.54	1.604	-103.9	0.93333
0.12661	-103.08	1.3914	-101.45	1.5755	-103.97	0.9375
0.12681	-103.11	1.3921	-101.44	1.5741	-103.99	0.93887
0.12701	-103.14	1.3927	-101.45	1.5583	-104.02	0.95285
0.12721	-103.11	1.3933	-101.41	1.5199	-104.02	0.96636
0.1274	-103.1	1.4026	-101.43	1.5238	-104.05	0.97579
0.1276	-103.08	1.4204	-101.41	1.5012	-104.08	0.99868
0.1278	-103.07	1.4319	-101.41	1.424	-104.1	1.0045
0.128	-103.06	1.4514	-101.41	1.2901	-104.11	1.0256
0.1282	-103.05	1.458	-101.4	1.2421	-104.12	1.0555
0.1284	-103.05	1.4677	-101.39	1.1936	-104.14	1.0533
0.1286	-103.03	1.4755	-101.41	1.179	-104.17	1.0544
0.1288	-103.03	1.4761	-101.37	1.1314	-104.16	1.0796
0.129	-103.02	1.4814	-101.38	1.1228	-104.16	1.0875
0.1292	-102.74	1.4801	-101.41	1.1188	-104.13	1.1118
0.1294	-102.47	1.4814	-101.37	1.0975	-104.13	1.1212
0.1296	-102.4	1.4852	-101.37	1.0949	-104.1	1.1463
0.1298	-102.39	1.4863	-101.37	1.0912	-104.1	1.1501
0.13	-102.39	1.4893	-101.36	1.0942	-104.08	1.1318
0.13019	-102.38	1.4904	-101.35	1.1305	-103.96	1.1359
0.13039	-102.38	1.4941	-101.31	1.1437	-103.95	1.1169
0.13059	-102.39	1.4998	-101.27	1.1876	-103.92	1.1122
0.13079	-102.39	1.5036	-101.26	1.2054	-103.92	1.1085
0.13099	-102.39	1.504	-101.21	1.2071	-103.92	1.1031
0.13119	-102.38	1.5034	-101.2	1.2094	-103.92	1.0804
0.13139	-102.39	1.5053	-101.2	1.2239	-103.92	1.0658
0.13159	-102.39	1.5008	-101.18	1.2297	-103.91	1.0477
0.13179	-102.38	1.4919	-101.13	1.2284	-103.93	1.048
0.13199	-102.39	1.4938	-101.07	1.2409	-103.95	1.0574
0.13219	-102.4	1.501	-101.04	1.2674	-103.96	1.0596
0.13239	-102.4	1.5036	-101.02	1.2881	-103.97	1.055
0.13259	-102.41	1.5106	-100.99	1.3203	-103.98	1.0788
0.13279	-102.41	1.5196	-100.96	1.3729	-104	1.0914
0.13298	-102.41	1.5283	-100.93	1.394	-104	1.1694
0.13318	-102.4	1.5486	-100.88	1.393	-103.99	1.2438
0.13338	-102.4	1.5522	-100.85	1.3964	-103.96	1.2883
0.13358	-102.37	1.5596	-100.8	1.404	-103.93	1.314
0.13378	-102.28	1.564	-100.74	1.3845	-103.93	1.3408
0.13398	-102.21	1.571	-100.68	1.3701	-103.79	1.3741
0.13418	-102.2	1.5807	-100.56	1.3626	-103.71	1.3883
0.13438	-102.19	1.5872	-100.39	1.3505	-103.69	1.4298
0.13458	-102.19	1.5961	-100.36	1.3526	-103.65	1.4735
0.13478	-102.19	1.5974	-100.38	1.3372	-103.64	1.5061
0.13498	-102.19	1.5936	-100.38	1.3125	-103.62	1.5164
0.13518	-102.21	1.5922	-100.37	1.2907	-103.62	1.5353
0.13538	-102.22	1.5901	-100.4	1.2793	-103.6	1.5599
0.13558	-102.29	1.5899	-100.38	1.2488	-103.6	1.5731
0.13577	-102.32	1.589	-100.41	1.253	-103.59	1.5784
0.13597	-102.28	1.5888	-100.44	1.2442	-103.61	1.5779
0.13617	-102.27	1.5875	-100.41	1.2154	-103.62	1.586
0.13637	-102.25	1.5848	-100.36	1.2026	-103.63	1.5793
0.13657	-102.21	1.5926	-100.38	1.1732	-103.63	1.5863
0.13677	-102.21	1.5929	-100.3	1.1554	-103.64	1.6017
0.13697	-102.19	1.608	-100.28	1.1479	-103.64	1.6018
0.13717	-102.17	1.6142	-100.25	1.1318	-103.66	1.5913
0.13737	-102.16	1.6216	-100.23	1.1427	-103.67	1.6039
0.13757	-102.15	1.6245	-100.24	1.1635	-103.7	1.5993
0.13777	-102.13	1.6388	-100.23	1.1849	-103.71	1.6106
0.13797	-102.1	1.6418	-100.18	1.2436	-103.72	1.6328
0.13817	-102.07	1.6446	-100.21	1.2869	-103.75	1.6505
0.13836	-102.02	1.6473	-100.18	1.3422	-103.77	1.6761
0.13856	-101.99	1.652	-100.18	1.4433	-103.78	1.7155
0.13876	-101.97	1.6583	-100.19	1.4696	-103.79	1.824
0.13896	-101.97	1.6599	-100.18	1.527	-103.8	1.8588
0.13916	-101.96	1.6632	-100.22	1.5878	-103.78	1.8748
0.13936	-101.9	1.6677	-100.27	1.5976	-103.77	1.9119
0.13956	-101.84	1.6672	-100.25	1.6209	-103.77	1.9307
0.13976	-101.74	1.6728	-100.28	1.6366	-103.77	1.936
0.13996	-101.67	1.6742	-100.25	1.6383	-103.73	1.9584
0.14016	-101.58	1.6741	-100.19	1.6556	-103.68	1.9581
0.14036	-101.68	1.6724	-100.19	1.6547	-103.65	1.9587
0.14056	-101.86	1.6709	-100.1	1.6451	-103.58	1.9301
0.14076	-101.92	1.671	-100.05	1.6553	-103.31	1.9071
0.14096	-101.97	1.6734	-100.05	1.6245	-103.18	1.9141
0.14115	-101.98	1.6733	-100.03	1.608	-103.05	1.917
0.14135	-101.98	1.6726	-100	1.6283	-102.89	1.9371
0.14155	-101.98	1.6694	-99.984	1.6317	-102.82	1.9406
0.14175	-101.99	1.6625	-99.961	1.6616	-102.78	1.9508
0.14195	-101.99	1.6532	-99.94	1.6841	-102.74	1.9659
0.14215	-101.99	1.6478	-99.911	1.6882	-102.74	1.9656
0.14235	-101.99	1.645	-99.867	1.7365	-102.74	1.9739
0.14255	-101.99	1.644	-99.911	1.7589	-102.74	1.9838
0.14275	-101.99	1.6455	-99.882	1.7516	-102.76	2.0078
0.14295	-101.98	1.6431	-99.891	1.7689	-102.79	2.0389
0.14315	-101.96	1.6419	-99.94	1.7744	-102.86	2.124
0.14335	-101.95	1.6399	-99.934	1.7796	-102.91	2.1252
0.14355	-101.95	1.6398	-99.94	1.7905	-102.93	2.1319
0.14375	-101.95	1.6361	-99.968	1.7732	-103.01	2.161
0.14394	-101.95	1.6329	-99.968	1.7647	-103.04	2.1637
0.14414	-101.95	1.6199	-100.02	1.7505	-103.07	2.1546
0.14434	-101.95	1.6109	-100.05	1.7128	-103.08	2.1499
0.14454	-101.94	1.6086	-100.05	1.7048	-103.12	2.13
0.14474	-101.93	1.6011	-100.08	1.687	-103.12	2.1015
0.14494	-101.92	1.5923	-100.09	1.6721	-103.13	2.0736
0.14514	-101.91	1.5878	-100.09	1.6765	-103.13	2.0575
0.14534	-101.9	1.5778	-100.11	1.6572	-103.15	2.028
0.14554	-101.9	1.5738	-100.09	1.6463	-103.14	2.0044
0.14574	-101.92	1.569	-100.1	1.6368	-103.13	1.9988
0.14594	-101.9	1.5697	-100.12	1.604	-103.12	1.9913
0.14614	-101.9	1.5662	-100.1	1.5793	-103.12	1.9931
0.14634	-101.92	1.5703	-100.1	1.574	-103.15	1.9802
0.14654	-101.92	1.5751	-100.11	1.5723	-103.16	1.9786
0.14673	-101.92	1.5949	-100.11	1.5623	-103.16	1.981
0.14693	-101.91	1.6032	-100.12	1.564	-103.18	1.9628
0.14713	-101.91	1.6051	-100.12	1.5236	-103.21	1.9399
0.14733	-101.89	1.6059	-100.13	1.519	-103.21	1.9183
0.14753	-101.91	1.6087	-100.18	1.5079	-103.24	1.9054
0.14773	-101.92	1.6125	-100.17	1.5021	-103.27	1.8893
0.14793	-101.92	1.6211	-100.14	1.4857	-103.31	1.8817
0.14813	-101.92	1.6567	-100.18	1.4808	-103.35	1.8749
0.14833	-101.92	1.6991	-100.17	1.4586	-103.37	1.8657
0.14853	-101.91	1.714	-100.17	1.4566	-103.38	1.8496
0.14873	-101.9	1.7204	-100.21	1.447	-103.44	1.835
0.14893	-101.88	1.7259	-100.18	1.4376	-103.47	1.8284
0.14913	-101.88	1.7315	-100.21	1.442	-103.49	1.8261
0.14932	-101.88	1.7316	-100.22	1.4104	-103.52	1.8159
0.14952	-101.89	1.728	-100.18	1.3954	-103.55	1.7987
0.14972	-101.89	1.7306	-100.18	1.3861	-103.59	1.7899
0.14992	-101.89	1.7321	-100.18	1.376	-103.61	1.7843
0.15012	-101.9	1.7349	-100.18	1.3475	-103.65	1.7783
0.15032	-101.89	1.7366	-100.18	1.3338	-103.66	1.7758
0.15052	-101.89	1.7333	-100.18	1.2883	-103.69	1.7925
0.15072	-101.89	1.7206	-100.18	1.2974	-103.74	1.7761
0.15092	-101.88	1.7188	-100.18	1.2727	-103.77	1.7553
0.15112	-101.88	1.7102	-100.17	1.258	-103.79	1.7323
0.15132	-101.87	1.7047	-100.14	1.258	-103.81	1.7147
0.15152	-101.87	1.706	-100.11	1.2294	-103.83	1.7192
0.15172	-101.87	1.7142	-100.09	1.2134	-103.85	1.7064
0.15192	-101.86	1.7309	-100.1	1.201	-103.87	1.7003
0.15211	-101.85	1.7374	-100.1	1.1772	-103.87	1.7017
0.15231	-101.85	1.7422	-100.08	1.1567	-103.86	1.7016
0.15251	-101.82	1.756	-100.09	1.1351	-103.84	1.6913
0.15271	-101.81	1.744	-100.08	1.1201	-103.83	1.698
0.15291	-101.81	1.7373	-100.04	1.1199	-103.81	1.6916
0.15311	-101.79	1.7094	-100.03	1.0915	-103.8	1.6827
0.15331	-101.78	1.6428	-100.01	1.0808	-103.79	1.6924
0.15351	-101.76	1.6337	-100.01	1.0723	-103.79	1.707
0.15371	-101.75	1.6333	-100.02	1.0513	-103.77	1.761
0.15391	-101.74	1.6312	-99.99	1.0433	-103.76	1.8691
0.15411	-101.73	1.6301	-99.99	1.041	-103.74	1.9182
0.15431	-101.73	1.6231	-99.931	1.0367	-103.71	1.9915
0.15451	-101.71	1.6218	-99.908	1.0473	-103.65	2.0487
0.15471	-101.71	1.6211	-99.894	1.0512	-103.65	2.0744
0.1549	-101.71	1.6219	-99.89	1.0369	-103.62	2.0827
0.1551	-101.71	1.6211	-99.9	1.0382	-103.62	2.1311
0.1553	-101.71	1.62	-99.879	1.0385	-103.62	2.1395
0.1555	-101.69	1.617	-99.89	1.0413	-103.62	2.1382
0.1557	-101.69	1.6152	-99.897	1.0493	-103.62	2.1179
0.1559	-101.68	1.6093	-99.873	1.0139	-103.6	2.1232
0.1561	-101.67	1.5927	-99.897	1.0075	-103.67	2.1068
0.1563	-101.67	1.5753	-99.884	1.0233	-103.67	2.0829
0.1565	-101.64	1.5617	-99.87	1.0032	-103.67	2.0607
0.1567	-101.6	1.559	-99.879	1.0117	-103.67	1.9615
0.1569	-101.56	1.5558	-99.87	1.0228	-103.67	1.9329
0.1571	-101.52	1.5808	-99.879	1.0064	-103.6	1.9124
0.1573	-101.5	1.585	-99.913	1.0241	-103.55	1.8925
0.1575	-101.44	1.5726	-99.879	1.0292	-103.54	1.8671
0.15769	-101.42	1.5655	-99.87	1.0364	-103.5	1.8696
0.15789	-101.39	1.5596	-99.855	1.0555	-103.49	1.8628
0.15809	-101.39	1.5531	-99.826	1.0547	-103.49	1.8608
0.15829	-101.36	1.5495	-99.859	1.0624	-103.49	1.8661
0.15849	-101.35	1.5501	-99.859	1.0768	-103.47	1.8658
0.15869	-101.34	1.5522	-99.865	1.0569	-103.47	1.8638
0.15889	-101.34	1.5534	-99.89	1.0679	-103.47	1.8957
0.15909	-101.34	1.5556	-99.907	1.0631	-103.51	1.9292
0.15929	-101.34	1.5552	-99.978	1.0379	-103.59	1.9402
0.15949	-101.35	1.5531	-99.998	1.0499	-103.62	1.9839
0.15969	-101.35	1.5498	-99.992	1.0377	-103.66	2.0083
0.15989	-101.34	1.5473	-100.03	1.0194	-103.73	2.0222
0.16009	-101.33	1.5363	-100.07	1.0303	-103.77	2.0627
0.16028	-100.92	1.5204	-100.08	1.0127	-103.81	2.0812
0.16048	-100.73	1.5175	-100.1	1.0259	-103.82	2.3128
0.16068	-100.39	1.5166	-100.13	1.0517	-103.84	2.3243
0.16088	-100.35	1.5167	-100.1	1.0293	-103.84	2.3358
0.16108	-100.36	1.5111	-100.16	1.0482	-103.84	2.3876
0.16128	-100.37	1.5092	-100.13	1.0452	-103.81	2.3688
0.16148	-100.39	1.5058	-100.1	1.0302	-103.8	2.3418
0.16168	-100.39	1.5081	-100.12	1.0376	-103.77	2.2512
0.16188	-100.39	1.5138	-100.12	1.037	-103.75	2.2231
0.16208	-100.39	1.5195	-100.1	1.0306	-103.72	2.2158
0.16228	-100.39	1.524	-100.12	1.0349	-103.72	2.2131
0.16248	-100.43	1.5273	-100.14	1.037	-103.71	2.1942
0.16268	-100.41	1.5281	-100.14	1.0183	-103.71	2.2104
0.16288	-100.41	1.5326	-100.16	1.0377	-103.71	2.1757
0.16307	-100.41	1.5332	-100.18	1.025	-103.71	2.1783
0.16327	-100.41	1.5285	-100.15	1.0176	-103.71	2.1832
0.16347	-100.42	1.5263	-100.15	1.0137	-103.74	2.1974
0.16367	-100.4	1.526	-100.15	0.9751	-103.76	2.1979
0.16387	-100.41	1.5089	-100.07	0.97804	-103.79	2.2039
0.16407	-100.44	1.4995	-100.11	0.96282	-103.82	2.2471
0.16427	-100.47	1.4917	-100.11	0.95025	-103.82	2.2534
0.16447	-100.47	1.4879	-100.11	0.94929	-103.84	2.26
0.16467	-100.47	1.4746	-100.15	0.93899	-103.9	2.269
0.16487	-100.46	1.4646	-100.14	0.92834	-103.91	2.2788
0.16507	-100.46	1.4576	-100.11	0.947	-103.92	2.3029
0.16527	-100.46	1.4448	-100.13	0.94761	-103.93	2.2925
0.16547	-100.44	1.4394	-100.11	0.96113	-103.96	2.2895
0.16567	-100.45	1.4358	-100.11	0.97053	-103.99	2.2784
0.16586	-100.44	1.4336	-100.14	0.9672	-104	2.2602
0.16606	-100.44	1.4357	-100.14	1.0017	-104	2.232
0.16626	-100.44	1.4504	-100.19	1.012	-104.01	2.1967
0.16646	-100.43	1.4817	-100.2	1.0018	-104.05	2.163
0.16666	-100.43	1.4922	-100.18	1.021	-104.06	2.1526
0.16686	-100.43	1.5037	-100.17	1.0426	-104.09	2.1558
0.16706	-100.42	1.5118	-100.16	1.0382	-104.12	2.1713
0.16726	-100.43	1.5129	-100.14	1.0572	-104.14	2.1844
0.16746	-100.44	1.5123	-100.16	1.0631	-104.16	2.2054
0.16766	-100.47	1.5111	-100.14	1.0494	-104.17	2.2397
0.16786	-100.46	1.5084	-100.12	1.0666	-104.18	2.224
0.16806	-100.46	1.5067	-100.07	1.0559	-104.2	2.1993
0.16826	-100.44	1.5021	-100.02	1.0689	-104.21	2.142
0.16846	-100.44	1.4944	-99.974	1.0984	-104.24	2.1558
0.16865	-100.45	1.4987	-99.916	1.0948	-104.27	2.1527
0.16885	-100.46	1.4909	-99.868	1.0837	-104.3	2.1698
0.16905	-100.43	1.4836	-99.839	1.0906	-104.36	2.1837
0.16925	-100.44	1.4818	-99.829	1.0937	-104.39	2.1825
0.16945	-100.44	1.4723	-99.786	1.1118	-104.41	2.196
0.16965	-100.41	1.4658	-99.792	1.1273	-104.41	2.2029
0.16985	-100.39	1.4627	-99.746	1.0986	-104.41	2.2108
0.17005	-100.38	1.4552	-99.705	1.1083	-104.41	2.2039
0.17025	-100.37	1.4466	-99.679	1.0977	-104.41	2.2042
0.17045	-100.36	1.4253	-99.633	1.0963	-104.41	2.21
0.17065	-100.3	1.3986	-99.595	1.1182	-104.41	2.184
0.17085	-100.27	1.3832	-99.589	1.1093	-104.41	2.1672
0.17105	-100.24	1.3657	-99.553	1.1091	-104.41	2.1609
0.17124	-100.24	1.3383	-99.571	1.1219	-104.4	2.1297
0.17144	-100.24	1.3281	-99.553	1.1207	-104.36	2.0847
0.17164	-100.24	1.2959	-99.524	1.1347	-104.35	2.0494
0.17184	-100.24	1.2628	-99.556	1.1271	-104.33	2.0372
0.17204	-100.24	1.2231	-99.531	1.1067	-104.29	2.0164
0.17224	-100.23	1.2092	-99.521	1.1067	-104.27	1.9917
0.17244	-100.23	1.2041	-99.545	1.0944	-104.27	1.9627
0.17264	-100.22	1.2013	-99.528	1.0709	-104.27	1.9483
0.17284	-100.22	1.1994	-99.505	1.0687	-104.26	1.9002
0.17304	-100.22	1.1974	-99.505	1.0515	-104.24	1.8137
0.17324	-100.22	1.196	-99.481	1.053	-104.23	1.7874
0.17344	-100.21	1.1995	-99.357	1.0716	-104.21	1.7566
0.17364	-100.21	1.2067	-99.311	1.0521	-104.19	1.725
0.17384	-100.21	1.2114	-99.234	1.0824	-104.19	1.6643
0.17403	-100.22	1.2221	-99.2	1.0979	-104.19	1.6146
0.17423	-100.22	1.2259	-99.134	1.0933	-104.12	1.6106
0.17443	-100.24	1.2338	-99.022	1.1278	-104.11	1.5694
0.17463	-100.24	1.249	-99.022	1.126	-103.91	1.4979
0.17483	-100.25	1.2478	-98.988	1.1307	-103.88	1.4561
0.17503	-100.26	1.251	-98.948	1.1278	-103.87	1.4334
0.17523	-100.24	1.2412	-98.99	1.1086	-103.82	1.4119
0.17543	-100.24	1.2369	-98.959	1.1116	-103.79	1.4014
0.17563	-100.24	1.2215	-99.009	1.1045	-103.79	1.3978
0.17583	-100.24	1.2195	-99.063	1.0972	-103.78	1.3976
0.17603	-100.22	1.221	-99.022	1.1153	-103.78	1.4064
0.17623	-100.21	1.2282	-99.086	1.1099	-103.79	1.4125
0.17643	-100.19	1.2195	-99.109	1.0859	-103.8	1.4346
0.17663	-100.19	1.2171	-99.022	1.121	-103.79	1.4525
0.17682	-100.19	1.2205	-99.061	1.1225	-103.79	1.5317
0.17702	-100.18	1.2191	-99.067	1.1038	-103.79	1.5753
0.17722	-100.18	1.2269	-99.052	1.1267	-103.79	1.6351
0.17742	-100.17	1.233	-99.105	1.1176	-103.79	1.7797
0.17762	-100.16	1.2383	-99.127	1.1216	-103.79	1.8587
0.17782	-100.16	1.2487	-99.157	1.1406	-103.82	1.9028
0.17802	-100.14	1.2548	-99.167	1.1425	-103.85	1.9493
0.17822	-100.13	1.2634	-99.148	1.1603	-103.86	1.9643
0.17842	-100.12	1.2652	-99.148	1.1685	-103.88	1.9876
0.17862	-100.1	1.2773	-99.116	1.1856	-103.88	2.0168
0.17882	-100.09	1.2859	-99.044	1.2101	-103.89	2.0597
0.17902	-100.08	1.2968	-99.075	1.2064	-103.94	2.0864
0.17922	-100.08	1.2975	-99.037	1.2091	-103.98	2.0889
0.17942	-100.07	1.2889	-99.002	1.229	-104.02	2.0702
0.17961	-100.04	1.2621	-99.066	1.2397	-104.06	2.0752
0.17981	-100.04	1.2374	-99.083	1.2369	-104.1	2.0595
0.18001	-100.04	1.2253	-99.101	1.2604	-104.12	2.0568
0.18021	-100.03	1.2157	-99.133	1.2405	-104.16	2.0629
0.18041	-100.02	1.2044	-99.138	1.2358	-104.18	2.047
0.18061	-100	1.197	-99.153	1.2445	-104.2	2.0325
0.18081	-99.989	1.1897	-99.173	1.2145	-104.21	2.0257
0.18101	-99.982	1.1847	-99.183	1.1997	-104.21	2.032
0.18121	-99.976	1.1806	-99.226	1.1786	-104.23	2.0345
0.18141	-99.951	1.1731	-99.263	1.1378	-104.26	2.0358
0.18161	-99.934	1.1741	-99.263	1.1291	-104.28	2.0591
0.18181	-99.922	1.1784	-99.311	1.1213	-104.28	2.0615
0.18201	-99.892	1.1977	-99.313	1.105	-104.3	2.0666
0.1822	-99.886	1.2067	-99.325	1.1119	-104.31	2.0784
0.1824	-99.878	1.2133	-99.368	1.0968	-104.31	2.0702
0.1826	-99.832	1.2164	-99.357	1.0919	-104.29	2.0724
0.1828	-99.815	1.2206	-99.368	1.105	-104.25	2.0409
0.183	-99.814	1.2237	-99.388	1.0913	-104.23	2.0203
0.1832	-99.808	1.2281	-99.38	1.1029	-104.2	1.9962
0.1834	-99.808	1.2299	-99.388	1.1148	-104.2	1.9802
0.1836	-99.806	1.2341	-99.401	1.1057	-104.15	1.946
0.1838	-99.792	1.2372	-99.35	1.1214	-104.03	1.8937
0.184	-99.78	1.2416	-99.411	1.1162	-104.02	1.8617
0.1842	-99.68	1.2432	-99.411	1.114	-104.01	1.8155
0.1844	-99.638	1.2391	-99.357	1.1251	-103.98	1.7844
0.1846	-99.615	1.2392	-99.397	1.1181	-103.95	1.7385
0.1848	-99.608	1.2404	-99.379	1.1187	-103.91	1.7123
0.18499	-99.594	1.2444	-99.359	1.1221	-103.9	1.6904
0.18519	-99.557	1.2476	-99.38	1.1074	-103.89	1.6895
0.18539	-99.554	1.2437	-99.365	1.1093	-103.88	1.6867
0.18559	-99.554	1.2457	-99.374	1.1159	-103.87	1.6926
0.18579	-99.556	1.2426	-99.441	1.1029	-103.87	1.7072
0.18599	-99.556	1.2383	-99.372	1.1252	-103.87	1.7535
0.18619	-99.556	1.2323	-99.376	1.1147	-103.87	1.7647
0.18639	-99.542	1.2251	-99.374	1.1127	-103.88	1.7816
0.18659	-99.553	1.2256	-99.374	1.1483	-103.88	1.8091
0.18679	-99.538	1.2265	-99.401	1.1521	-103.93	1.8391
0.18699	-99.554	1.2251	-99.376	1.1212	-103.97	1.8682
0.18719	-99.557	1.2281	-99.365	1.1539	-103.99	1.8771
0.18739	-99.57	1.2267	-99.376	1.143	-103.99	1.8797
0.18759	-99.573	1.2291	-99.383	1.1498	-103.99	1.8651
0.18778	-99.573	1.2144	-99.368	1.1718	-103.99	1.8547
0.18798	-99.573	1.2109	-99.383	1.1452	-104	1.8394
0.18818	-99.561	1.2068	-99.337	1.1591	-103.99	1.8121
0.18838	-99.559	1.204	-99.345	1.1514	-103.99	1.7787
0.18858	-99.554	1.2075	-99.363	1.1362	-103.98	1.7592
0.18878	-99.561	1.2101	-99.345	1.1481	-104	1.7202
0.18898	-99.565	1.2106	-99.369	1.1388	-103.99	1.6939
0.18918	-99.574	1.2114	-99.356	1.1315	-103.93	1.6998
0.18938	-99.576	1.2164	-99.369	1.1427	-103.93	1.721
0.18958	-99.571	1.2198	-99.415	1.1435	-103.95	1.7395
0.18978	-99.561	1.2255	-99.383	1.1484	-103.94	1.8307
0.18998	-99.559	1.2279	-99.453	1.1576	-103.94	1.8238
0.19018	-99.551	1.2323	-99.537	1.175	-103.96	1.8218
0.19038	-99.533	1.2386	-99.533	1.1873	-103.96	1.8486
0.19057	-99.541	1.2439	-99.546	1.2067	-103.97	1.8652
0.19077	-99.525	1.2473	-99.603	1.2111	-103.98	1.8637
0.19097	-99.512	1.2429	-99.582	1.237	-103.97	1.8582
0.19117	-99.501	1.2231	-99.615	1.2533	-103.93	1.8455
0.19137	-99.481	1.1802	-99.623	1.2565	-103.84	1.8148
0.19157	-99.458	1.1494	-99.644	1.2735	-103.68	1.7777
0.19177	-99.44	1.147	-99.667	1.2792	-103.6	1.7771
0.19197	-99.416	1.1373	-99.652	1.2841	-103.53	1.7644
0.19217	-99.416	1.13	-99.655	1.293	-103.5	1.7592
0.19237	-99.402	1.1152	-99.687	1.2998	-103.46	1.7491
0.19257	-99.384	1.111	-99.687	1.2943	-103.45	1.7414
0.19277	-99.374	1.1065	-99.731	1.3021	-103.44	1.741
0.19297	-99.347	1.1053	-99.78	1.2851	-103.44	1.7521
0.19316	-99.336	1.0985	-99.788	1.2702	-103.44	1.7721
0.19336	-99.324	1.0904	-99.806	1.2841	-103.43	1.7992
0.19356	-99.304	1.0685	-99.812	1.2607	-103.42	1.8092
0.19376	-99.304	1.0724	-99.809	1.2665	-103.42	1.8424
0.19396	-99.304	1.0708	-99.83	1.2642	-103.41	1.8846
0.19416	-99.293	1.0721	-99.806	1.2374	-103.35	1.9152
0.19436	-99.261	1.075	-99.781	1.2345	-103.27	1.9283
0.19456	-99.251	1.077	-99.781	1.2233	-103.27	2.0083
0.19476	-99.246	1.0837	-99.769	1.2199	-103.27	2.0488
0.19496	-99.234	1.0855	-99.762	1.2165	-103.28	2.0773
0.19516	-99.19	1.0903	-99.749	1.193	-103.28	2.0998
0.19536	-99.19	1.1053	-99.72	1.1942	-103.28	2.1104
0.19556	-99.19	1.1054	-99.698	1.1889	-103.28	2.1222
0.19576	-99.139	1.103	-99.658	1.1591	-103.28	2.1286
0.19595	-99.109	1.0703	-99.617	1.1447	-103.29	2.129
0.19615	-99.104	1.0602	-99.604	1.1379	-103.32	2.1329
0.19635	-99.089	1.0546	-99.566	1.1345	-103.36	2.1287
0.19655	-99.066	1.0619	-99.49	1.1511	-103.39	2.1335
0.19675	-99.065	1.0711	-99.49	1.1342	-103.49	2.1406
0.19695	-99.065	1.0818	-99.394	1.1451	-103.51	2.1415
0.19715	-99.063	1.1	-99.356	1.156	-103.55	2.1437
0.19735	-99.048	1.1352	-99.371	1.1236	-103.56	2.1409
0.19755	-99.055	1.1594	-99.311	1.1189	-103.58	2.1219
0.19775	-99.048	1.195	-99.311	1.104	-103.6	2.105
0.19795	-99.043	1.2413	-99.318	1.1067	-103.63	2.074
0.19815	-99.02	1.2579	-99.302	1.1197	-103.66	2.0354
0.19835	-99.005	1.2704	-99.319	1.1384	-103.7	2.0096
[truncated: 9,041 more rows]

## Sheet: Fig2D
17.084	2.8129	13.826	12.194
19.187	17.238	28.397	10.228
22.065	16.103	14.878	5.8192
15.749	-0.10524	12.279	15.284
12.259	-1.2607	7.2506	8.8796
24.732	-1.2456	12.942	16.356
14.864	-3.0939	14.807	5.4648
7.3164	13.739	26.137	1.7706
23.3	-2.1975	23.038	5.2812
21.909	-1.4373	13.362	5.7823
13.775	-3.9518	14.919	7.7027
6.1247	-3.6698	4.9147	3.9825
15.982	13.122	6.9931	4.8236
18.561	19.23	16.774	NaN
18.328	2.4951	11.886	NaN
21.876	0.21846	18.599	NaN
13.696	13.392	9.6114	NaN
11.239	18.264	17.538	NaN
13.848	2.1589	19.445	NaN
16.997	2.8853	6.1017	NaN
11.798	29.956	10.415	NaN
19.608	16.109	1.4215	NaN
10.463	-1.4347	-0.14256	NaN
12.929	-1.5606	15.258	NaN
32.15	-0.2706	5.1107	NaN
28.445	7.2815	5.8575	NaN
29.79	7.8449	14.255	NaN
14.108	7.5017	12.02	NaN
24.263	7.812	NaN	NaN
14.14	NaN	NaN	NaN
14.178	NaN	NaN	NaN
20.536	NaN	NaN	NaN
19.276	NaN	NaN	NaN
16.136	NaN	NaN	NaN
21.674	NaN	NaN	NaN
11.862	NaN	NaN	NaN
6.3231	NaN	NaN	NaN
20.756	NaN	NaN	NaN
16.041	NaN	NaN	NaN
26.693	NaN	NaN	NaN
25.818	NaN	NaN	NaN
21.11	NaN	NaN	NaN
20.634	NaN	NaN	NaN
10.199	NaN	NaN	NaN
10.943	NaN	NaN	NaN
12.017	NaN	NaN	NaN
36.915	NaN	NaN	NaN
25.931	NaN	NaN	NaN
16.031	NaN	NaN	NaN
11.507	NaN	NaN	NaN
17.887	NaN	NaN	NaN
19.889	NaN	NaN	NaN
16.066	NaN	NaN	NaN
9.889	NaN	NaN	NaN
24.109	NaN	NaN	NaN
20.227	NaN	NaN	NaN
14.953	NaN	NaN	NaN
21.027	NaN	NaN	NaN
22.407	NaN	NaN	NaN
16.175	NaN	NaN	NaN
20.716	NaN	NaN	NaN
13.474	NaN	NaN	NaN
25.394	NaN	NaN	NaN
15.596	NaN	NaN	NaN
27.184	NaN	NaN	NaN
14.909	NaN	NaN	NaN
12.168	NaN	NaN	NaN
14.461	NaN	NaN	NaN
17.702	NaN	NaN	NaN
12.635	NaN	NaN	NaN
11.012	NaN	NaN	NaN
14.154	NaN	NaN	NaN
12.944	NaN	NaN	NaN
15.01	NaN	NaN	NaN
16.315	NaN	NaN	NaN
10.558	NaN	NaN	NaN
14.442	NaN	NaN	NaN
11.382	NaN	NaN	NaN
30.007	NaN	NaN	NaN
18.595	NaN	NaN	NaN
12.924	NaN	NaN	NaN
8.2422	NaN	NaN	NaN
22.979	NaN	NaN	NaN
8.5395	NaN	NaN	NaN
16.58	NaN	NaN	NaN
8.7271	NaN	NaN	NaN
20.428	NaN	NaN	NaN
12.921	NaN	NaN	NaN
28.613	NaN	NaN	NaN

## Sheet: Fig2E
0.75941	0.35687	0.61073	1.5311
0.85038	1.8974	0.26154	0.06
0.35067	1.4391	0.66931	2.0112
0.42933	0.0087694	0.84832	2.4479
0.53851	3.5219	1.293	1.0514
0.24813	0.77346	0.91324	0.86743
0.86804	0.99594	0.80199	0.84327
0.81278	1.4723	0.30122	1.3567
0.26193	0.47171	0.31622	3.0558
0.27588	0.0097678	0.86982	1.3444
0.34167	1.157	0.7246	0.78444
0.51601	0.65199	2.5912	4.0074
0.4062	1.6548	1.0121	1.1435
0.39366	1.5781	1.6193	NaN
0.37207	3.3698	1.3731	NaN
0.29751	0.0021263	0.37606	NaN
0.53501	1.5953	0.61329	NaN
0.54412	1.8672	0.30899	NaN
0.84437	2.9535	0.33661	NaN
0.27328	2.9297	1.6001	NaN
0.462	1.5733	1.4177	NaN
0.20433	1.7462	0.57134	NaN
0.52569	0.06583	0.0052415	NaN
0.53938	0.10338	0.50454	NaN
0.15382	0.018716	1.1504	NaN
0.13563	2.0812	1.2422	NaN
0.16825	2.5195	0.44089	NaN
0.34849	2.1883	0.75741	NaN
0.24981	2.4578	NaN	NaN
0.53396	NaN	NaN	NaN
0.67056	NaN	NaN	NaN
0.36005	NaN	NaN	NaN
0.22818	NaN	NaN	NaN
0.75741	NaN	NaN	NaN
0.23576	NaN	NaN	NaN
0.29306	NaN	NaN	NaN
0.90428	NaN	NaN	NaN
0.28091	NaN	NaN	NaN
1.1233	NaN	NaN	NaN
0.18846	NaN	NaN	NaN
0.18172	NaN	NaN	NaN
0.26725	NaN	NaN	NaN
0.25979	NaN	NaN	NaN
0.76766	NaN	NaN	NaN
0.41344	NaN	NaN	NaN
0.55943	NaN	NaN	NaN
0.1487	NaN	NaN	NaN
0.2793	NaN	NaN	NaN
0.45268	NaN	NaN	NaN
0.36843	NaN	NaN	NaN
0.48403	NaN	NaN	NaN
0.36607	NaN	NaN	NaN
0.38609	NaN	NaN	NaN
0.73185	NaN	NaN	NaN
0.25258	NaN	NaN	NaN
0.23541	NaN	NaN	NaN
0.52617	NaN	NaN	NaN
0.30166	NaN	NaN	NaN
0.25404	NaN	NaN	NaN
0.7265	NaN	NaN	NaN
0.30924	NaN	NaN	NaN
0.71747	NaN	NaN	NaN
0.27787	NaN	NaN	NaN
1.6487	NaN	NaN	NaN
0.27009	NaN	NaN	NaN
0.6217	NaN	NaN	NaN
0.49652	NaN	NaN	NaN
0.45433	NaN	NaN	NaN
0.40605	NaN	NaN	NaN
0.63564	NaN	NaN	NaN
0.45025	NaN	NaN	NaN
0.5209	NaN	NaN	NaN
0.68047	NaN	NaN	NaN
0.38703	NaN	NaN	NaN
0.38664	NaN	NaN	NaN
0.74031	NaN	NaN	NaN
0.62036	NaN	NaN	NaN
1.0975	NaN	NaN	NaN
0.17595	NaN	NaN	NaN
0.26562	NaN	NaN	NaN
0.34092	NaN	NaN	NaN
0.52869	NaN	NaN	NaN
0.21121	NaN	NaN	NaN
0.14618	NaN	NaN	NaN
0.72977	NaN	NaN	NaN
0.67869	NaN	NaN	NaN
0.40005	NaN	NaN	NaN
0.61346	NaN	NaN	NaN
0.26056	NaN	NaN	NaN

## Sheet: Fig2F
38	17.244
40	16.103
22	16.843
17	10.225
19	11.028
30	14.989
26	13.413
38	6.3601
30	14.509
25	15.658
33	9.7429
31	15.313
26	17.52
20	13.32
28	12.386
26	15.561
22	13.307
25	12.344
21	12.782
29	12.514
28	21.123
30	16.449
32	18.171
31	10.506
42	18.686
29	18.876
27	16.771
33	6.8874
32	18.734
37.5	23.264
22	18.57
28	10.822
26	16.014
44	26.159
32	19.069
28	14.727
24	17.082
29	18.13
26	18.728
31	20.409
33	17.93
34	14.128
32	13.351
44	10.542
35	17.153
31	13.225
34	14.462
31	13.073
31	11.505
39	12.174
29	19.781
46	9.7396
38	11.727
27	13.523
26	15.567
63	16.675
37	19.058
33	10.254
65	13.002
33	14.963
69	12.885
30	18.288
26	13.673
26	5.5438
28	13.058
41	18.075
36	15.795
31	16.954
26	21.572
28	18.677
25	15.966
31	19.286
25	21.679
23	9.007
17	27.193
25	12.57
18	12.706
24	17.493
17.5	15.339
31	18.557
23	17.91
27	16.787
23	15.832
22	16.931
24	16.987
24	16.26
51	15.016
54	22.661
75	21.361
84	0.78258
58	10.183
56	11.835
45	15.669
45	18.461
53	12.117
63	11.373
45	14.334
66	5.2632

## Sheet: Fig2G
-104.67	0.67923	-160	0.99747	0.99807
-84.667	0.37776	-159	0.99728	0.99792
-124.67	0.67356	-158	0.99708	0.99777
-84.667	0.74573	-157	0.99686	0.9976
-119.67	0.64462	-156	0.99662	0.99742
-144.67	0.84937	-155	0.99637	0.99723
-40	0.0014744	-154	0.9961	0.99702
-98	0.52093	-153	0.99581	0.9968
-128	0.73531	-152	0.99549	0.99656
-103	0.58962	-151	0.99515	0.99631
-78	0.3228	-150	0.99479	0.99603
-128	0.67047	-149	0.9944	0.99574
-108	0.66445	-148	0.99398	0.99542
-108	0.55785	-147	0.99353	0.99508
-108	0.70828	-146	0.99305	0.99471
-40	0.0014744	-145	0.99253	0.99432
-124	0.8807	-144	0.99197	0.9939
-124	0.72457	-143	0.99137	0.99344
-99	0.66157	-142	0.99073	0.99296
-74	0.52376	-141	0.99004	0.99243
-104	0.62031	-140	0.9893	0.99187
-104	0.65234	-139	0.9885	0.99127
-104	0.54826	-138	0.98765	0.99062
-40	0.0014744	-137	0.98673	0.98993
-75.5	0.64788	-136	0.98574	0.98919
-100.5	1.1387	-135	0.98469	0.98839
-125.5	1.1886	-134	0.98355	0.98753
-105.5	0.67133	-133	0.98234	0.98661
-105.5	0.58726	-132	0.98103	0.98562
-105.5	0.76538	-131	0.97963	0.98456
-40	0.0014744	-130	0.97813	0.98343
-86	0.78325	-129	0.97653	0.98221
-86	0.61619	-128	0.9748	0.9809
-106	0.99544	-127	0.97296	0.9795
-106	0.89515	-126	0.97098	0.978
-126	1.0058	-125	0.96886	0.9764
-126	0.95601	-124	0.9666	0.97468
-40	0.0014744	-123	0.96417	0.97283
-115	1.0126	-122	0.96158	0.97086
-70	0.27634	-121	0.95881	0.96875
-85	0.71875	-120	0.95584	0.96649
-100	1.0552	-119	0.95268	0.96408
-40	0.0014744	-118	0.9493	0.96149
-109	0.87699	-117	0.94569	0.95873
-125	0.90722	-116	0.94184	0.95578
-76	0.4026	-115	0.93773	0.95263
-93	0.68733	-114	0.93336	0.94927
-101	0.89184	-113	0.9287	0.94568
-114	0.98197	-112	0.92374	0.94185
-74	0.401	-111	0.91847	0.93777
-88	0.64208	-110	0.91286	0.93343
-40	0.0014744	-109	0.90691	0.9288
-94.667	0.56442	-108	0.9006	0.92388
-74.667	0.32811	-107	0.89391	0.91865
-61.667	0.16852	-106	0.88683	0.9131
-94.667	0.77153	-105	0.87934	0.9072
-83.667	0.59223	-104	0.87143	0.90095
-72.667	0.40408	-103	0.86307	0.89432
-40	0.0014744	-102	0.85427	0.88731
-115	0.89208	-101	0.845	0.87989
-74	0.29849	-100	0.83525	0.87206
-88	0.5403	-99	0.82502	0.86379
-101	0.73587	-98	0.81429	0.85508
-40	0.0014744	-97	0.80307	0.84591
-64.667	0.67667	-96	0.79134	0.83627
-64.667	0.49807	-95	0.7791	0.82615
-84.667	0.72835	-94	0.76636	0.81555
-84.667	0.70249	-93	0.75311	0.80445
-49.667	0.15155	-92	0.73937	0.79285
-49.667	0.26878	-91	0.72514	0.78076
-20	0.036631	-90	0.71044	0.76816
-68	0.34819	-89	0.69529	0.75507
-53	0.16387	-88	0.6797	0.74148
-53	0.17335	-87	0.66369	0.72742
-53	0.013059	-86	0.64731	0.71288
-68	0.50962	-85	0.63057	0.69789
-88	0.6482	-84	0.6135	0.68247
-20	0.036631	-83	0.59616	0.66664
-64	0.29642	-82	0.57857	0.65042
-49	-0.04264	-81	0.56078	0.63385
-49	0.045463	-80	0.54283	0.61695
-44	0.061567	-79	0.52477	0.59977
-84	0.6705	-78	0.50665	0.58234
-64	0.49948	-77	0.48851	0.5647
-20	0.036631	-76	0.4704	0.54689
-50.5	0.18352	-75	0.45236	0.52896
-50.5	0.16614	-74	0.43445	0.51096
-50.5	0.10043	-73	0.41671	0.49293
-45.5	0.23164	-72	0.39918	0.47492
-65.5	0.48645	-71	0.38191	0.45697
-20	0.036631	-70	0.36493	0.43914
-66	0.36343	-69	0.34828	0.42146
-66	0.41398	-68	0.33199	0.40397
-66	0.38595	-67	0.3161	0.38673
-66	0.35951	-66	0.30062	0.36977
-66	0.30285	-65	0.28559	0.35313
-66	0.11127	-64	0.27101	0.33683
-20	0.036631	-63	0.25691	0.32091
-55	-0.069566	-62	0.2433	0.3054
-55	0.16212	-61	0.23019	0.29032
-55	0.14162	-60	0.21758	0.27568
-55	0.035494	-59	0.20548	0.26151
-20	0.036631	-58	0.19389	0.24783
-60	-0.17038	-57	0.18279	0.23463
-60	-0.20669	-56	0.1722	0.22192
-60	0.26051	-55	0.1621	0.20972
-60	-0.28894	-54	0.15248	0.19801
-60	-0.14397	-53	0.14334	0.18681
-60	-0.33243	-52	0.13465	0.1761
-60	0.16251	-51	0.12642	0.16587
-60	0.064778	-50	0.11862	0.15613
-20	0.036631	-49	0.11124	0.14686
-54.667	0.28439	-48	0.10426	0.13805
-54.667	0.25691	-47	0.097676	0.12969
-50.667	0.056568	-46	0.091463	0.12177
-50.667	0.0057783	-45	0.085609	0.11426
-50.667	0.052095	-44	0.080095	0.10716
-50.667	0.11186	-43	0.074908	0.10045
-20	0.036631	-42	0.070031	0.09412
-60	-0.049446	-41	0.06545	0.088147
-60	0.22782	-40	0.061148	0.082519
-60	0.16696	-39	0.057112	0.07722
-60	0.073837	-38	0.053327	0.072235
-20	0.036631	-37	0.049779	0.067547
NaN	NaN	-36	0.046456	0.063143
NaN	NaN	-35	0.043345	0.059008
NaN	NaN	-34	0.040433	0.055128
NaN	NaN	-33	0.037709	0.05149
NaN	NaN	-32	0.035162	0.048079
NaN	NaN	-31	0.032781	0.044883
NaN	NaN	-30	0.030557	0.04189
NaN	NaN	-29	0.028478	0.039089
NaN	NaN	-28	0.026538	0.036468
NaN	NaN	-27	0.024726	0.034017
NaN	NaN	-26	0.023035	0.031724
NaN	NaN	-25	0.021457	0.029582
NaN	NaN	-24	0.019984	0.02758
NaN	NaN	-23	0.018611	0.02571
NaN	NaN	-22	0.017331	0.023964
NaN	NaN	-21	0.016137	0.022333
NaN	NaN	-20	0.015025	0.020812

## Sheet: Fig2H
-104.67	0.96516	-160	0.076995
-84.667	1.4961	-159	0.080089
-124.67	1.0735	-158	0.083338
-84.667	1.3025	-157	0.086748
-119.67	0.23815	-156	0.090327
-144.67	0.14315	-155	0.094085
-63.924	1.2034	-154	0.09803
-84.428	0.50555	-153	0.10217
-45.792	0.46964	-152	0.10652
-44.812	0.81544	-151	0.11108
20	0.03	-150	0.11587
-128	0.469	-149	0.12089
-103	1.0278	-148	0.12616
-128	0.3475	-147	0.1317
-68	1.0234	-146	0.13751
-48	0.87521	-145	0.1436
-64.231	0.36788	-144	0.15
-50.292	0.39822	-143	0.15671
-51.689	0.16078	-142	0.16374
-49.257	0.49459	-141	0.17113
-106.04	0.88381	-140	0.17887
20	0.03	-139	0.187
-124	0.31311	-138	0.19552
-124	0.21092	-137	0.20445
-99	0.79695	-136	0.21382
-64	1.7362	-135	0.22363
-54.649	0.30299	-134	0.23393
-41.136	0.50659	-133	0.24471
-45.809	0.46552	-132	0.25601
-160	0.022766	-131	0.26784
-99.764	0.56997	-130	0.28024
20	0.03	-129	0.29321
-75.5	1.9386	-128	0.3068
-100.5	0.72684	-127	0.32101
-125.5	0.2559	-126	0.33587
-45.5	1.0914	-125	0.35141
-65.5	0.82939	-124	0.36765
-85.5	1.5556	-123	0.38462
-48.337	0.13799	-122	0.40233
-45.11	0.39212	-121	0.42081
-43.746	0.40278	-120	0.44008
-160	0.037439	-119	0.46016
-100.9	1.3311	-118	0.48107
20	0.03	-117	0.50283
-86	1.5877	-116	0.52544
-106	0.8044	-115	0.54892
-106	0.84783	-114	0.57327
-126	0.28591	-113	0.59849
-126	0.3027	-112	0.62458
-64.572	1.5127	-111	0.65153
-62.603	1.5237	-110	0.67932
-62.33	1.3883	-109	0.70793
-61.332	1.1528	-108	0.73731
20	0.03	-107	0.76743
-115	0.49448	-106	0.79823
-70	0.39163	-105	0.82963
-85	1.5276	-104	0.86156
-100	0.97417	-103	0.89392
-52.479	0.74904	-102	0.9266
-54.559	0.19726	-101	0.95947
-53.764	0.39856	-100	0.99239
-52.979	0.59527	-99	1.0252
20	0.03	-98	1.0577
-88	1.3076	-97	1.0897
-101	0.99593	-96	1.1211
-115	0.60041	-95	1.1516
-74	1.1475	-94	1.1809
-57.126	0.40048	-93	1.2089
-55.457	0.41386	-92	1.2352
-53.611	0.34754	-91	1.2598
-58.937	0.35426	-90	1.2823
20	0.03	-89	1.3024
NaN	NaN	-88	1.3201
NaN	NaN	-87	1.3351
NaN	NaN	-86	1.3472
NaN	NaN	-85	1.3564
NaN	NaN	-84	1.3624
NaN	NaN	-83	1.3653
NaN	NaN	-82	1.3649
NaN	NaN	-81	1.3614
NaN	NaN	-80	1.3547
NaN	NaN	-79	1.3449
NaN	NaN	-78	1.3321
NaN	NaN	-77	1.3166
NaN	NaN	-76	1.2983
NaN	NaN	-75	1.2777
NaN	NaN	-74	1.2547
NaN	NaN	-73	1.2298
NaN	NaN	-72	1.2031
NaN	NaN	-71	1.1748
NaN	NaN	-70	1.1452
NaN	NaN	-69	1.1145
NaN	NaN	-68	1.083
NaN	NaN	-67	1.0508
NaN	NaN	-66	1.0182
NaN	NaN	-65	0.98539
NaN	NaN	-64	0.95248
NaN	NaN	-63	0.91964
NaN	NaN	-62	0.88701
NaN	NaN	-61	0.85474
NaN	NaN	-60	0.82291
NaN	NaN	-59	0.79163
NaN	NaN	-58	0.76097
NaN	NaN	-57	0.73101
NaN	NaN	-56	0.70178
NaN	NaN	-55	0.67335
NaN	NaN	-54	0.64574
NaN	NaN	-53	0.61897
NaN	NaN	-52	0.59306
NaN	NaN	-51	0.56802
NaN	NaN	-50	0.54386
NaN	NaN	-49	0.52056
NaN	NaN	-48	0.49813
NaN	NaN	-47	0.47656
NaN	NaN	-46	0.45583
NaN	NaN	-45	0.43592
NaN	NaN	-44	0.41682
NaN	NaN	-43	0.3985
NaN	NaN	-42	0.38095
NaN	NaN	-41	0.36414
NaN	NaN	-40	0.34805
NaN	NaN	-39	0.33266
NaN	NaN	-38	0.31793
NaN	NaN	-37	0.30386
NaN	NaN	-36	0.29041
NaN	NaN	-35	0.27756
NaN	NaN	-34	0.26528
NaN	NaN	-33	0.25356
NaN	NaN	-32	0.24238
NaN	NaN	-31	0.2317
NaN	NaN	-30	0.22151
NaN	NaN	-29	0.21179
NaN	NaN	-28	0.20252
NaN	NaN	-27	0.19367
NaN	NaN	-26	0.18524
NaN	NaN	-25	0.1772
NaN	NaN	-24	0.16953
NaN	NaN	-23	0.16222
NaN	NaN	-22	0.15525
NaN	NaN	-21	0.14861
NaN	NaN	-20	0.14228
NaN	NaN	-19	0.13625
NaN	NaN	-18	0.1305
NaN	NaN	-17	0.12502
NaN	NaN	-16	0.1198
NaN	NaN	-15	0.11483
NaN	NaN	-14	0.11009
NaN	NaN	-13	0.10558
NaN	NaN	-12	0.10127
NaN	NaN	-11	0.097175
NaN	NaN	-10	0.093271
NaN	NaN	-9	0.089552
NaN	NaN	-8	0.086009
NaN	NaN	-7	0.082634
NaN	NaN	-6	0.079419
NaN	NaN	-5	0.076356
NaN	NaN	-4	0.073439
NaN	NaN	-3	0.07066
NaN	NaN	-2	0.068014
NaN	NaN	-1	0.065492
NaN	NaN	0	0.063091

## Sheet: Fig2I
28.3	36.169	5.1544
3.1433	4.7735	6.0176

## Sheet: Fig2J
-2.5999	2.2034	-64.022	-69.985	0.28283	0.26798	0	0.52896
-2.5998	2.2034	-63.897	-69.894	0.28176	0.26709	0	0.52746
-2.5997	2.2035	-63.924	-70.016	0.28069	0.2662	0	0.52595
-2.5996	2.2036	-63.988	-70.046	0.27962	0.2653	0	0.52445
-2.5995	2.2037	-63.915	-70.12	0.27854	0.2644	0	0.52294
-2.5994	2.2038	-63.863	-69.997	0.27747	0.2635	0	0.52143
-2.5993	2.2039	-63.842	-70.01	0.27639	0.26259	0	0.51992
-2.5992	2.204	-63.769	-70.019	0.27531	0.26168	0	0.51842
-2.5991	2.204	-63.997	-69.924	0.27423	0.26076	0	0.51691
-2.599	2.2041	-63.976	-70.019	0.27315	0.25985	0	0.5154
-2.5989	2.2042	-63.955	-70.046	0.27206	0.25893	0	0.51389
-2.5988	2.2043	-63.885	-70.049	0.27098	0.258	0	0.51238
-2.5987	2.2044	-63.848	-70.065	0.26989	0.25708	0	0.51087
-2.5986	2.2045	-63.927	-70.043	0.2688	0.25615	0	0.50936
-2.5985	2.2045	-63.909	-70.004	0.26771	0.25522	0	0.50785
-2.5984	2.2046	-63.827	-70.074	0.26662	0.25428	0	0.50634
-2.5983	2.2047	-63.866	-70.065	0.26553	0.25334	0	0.50483
-2.5982	2.2048	-63.83	-70.095	0.26444	0.2524	0	0.50332
-2.5981	2.2049	-63.924	-70.007	0.26334	0.25146	0	0.50181
-2.598	2.205	-63.897	-69.994	0.26225	0.25051	0	0.5003
-2.5979	2.2051	-63.769	-69.891	0.26115	0.24956	0	0.49879
-2.5978	2.2051	-63.906	-69.976	0.26005	0.24861	0	0.49728
-2.5977	2.2052	-63.796	-70.092	0.25895	0.24766	0	0.49576
-2.5976	2.2053	-63.83	-69.982	0.25786	0.2467	0	0.49425
-2.5975	2.2054	-63.854	-69.982	0.25676	0.24575	0	0.49274
-2.5974	2.2055	-63.692	-70.01	0.25566	0.24479	0	0.49123
-2.5973	2.2056	-63.75	-70.077	0.25455	0.24382	0	0.48971
-2.5972	2.2056	-63.903	-69.982	0.25345	0.24286	0	0.4882
-2.5971	2.2057	-63.909	-69.976	0.25235	0.24189	0	0.48669
-2.597	2.2058	-63.955	-69.86	0.25125	0.24092	0	0.48517
-2.5969	2.2059	-63.787	-69.982	0.25014	0.23995	0	0.48366
-2.5968	2.206	-63.936	-70.031	0.24904	0.23898	0	0.48215
-2.5967	2.2061	-63.839	-70.055	0.24793	0.238	0	0.48063
-2.5966	2.2062	-63.827	-69.799	0.24683	0.23703	0	0.47912
-2.5965	2.2062	-63.845	-69.949	0.24572	0.23605	0	0.47761
-2.5964	2.2063	-63.814	-69.979	0.24462	0.23507	0	0.47609
-2.5963	2.2064	-63.677	-69.927	0.24351	0.23409	0	0.47458
-2.5962	2.2065	-63.833	-69.833	0.24241	0.2331	0	0.47306
-2.5961	2.2066	-63.747	-69.875	0.2413	0.23212	0	0.47155
-2.596	2.2067	-63.808	-69.787	0.24019	0.23113	0	0.47003
-2.5959	2.2067	-63.717	-69.833	0.23908	0.23014	0	0.46852
-2.5958	2.2068	-63.741	-69.875	0.23798	0.22915	0	0.46701
-2.5957	2.2069	-63.833	-69.787	0.23687	0.22816	0	0.46549
-2.5956	2.207	-63.784	-69.64	0.23576	0.22717	0	0.46398
-2.5955	2.2071	-63.625	-69.659	0.23466	0.22618	0	0.46246
-2.5954	2.2072	-63.814	-69.708	0.23355	0.22518	0	0.46095
-2.5953	2.2073	-63.735	-69.683	0.23244	0.22419	0	0.45943
-2.5952	2.2073	-63.836	-69.689	0.23134	0.22319	0	0.45792
-2.5951	2.2074	-63.909	-69.738	0.23023	0.22219	0	0.4564
-2.595	2.2075	-63.823	-69.817	0.22912	0.22119	0	0.45489
-2.5949	2.2076	-63.775	-69.631	0.22802	0.22019	0	0.45337
-2.5948	2.2077	-63.817	-69.646	0.22691	0.21919	0	0.45186
-2.5947	2.2078	-63.833	-69.744	0.22581	0.21819	0	0.45035
-2.5946	2.2078	-63.921	-69.778	0.2247	0.21719	0	0.44883
-2.5945	2.2079	-63.692	-69.787	0.2236	0.21618	0	0.44732
-2.5944	2.208	-63.833	-69.741	0.22249	0.21518	0	0.4458
-2.5943	2.2081	-63.906	-69.72	0.22139	0.21418	0	0.44429
-2.5942	2.2082	-63.86	-69.692	0.22029	0.21317	0	0.44278
-2.5941	2.2083	-63.836	-69.766	0.21918	0.21217	0	0.44126
-2.594	2.2084	-64.01	-69.714	0.21808	0.21116	0	0.43975
-2.5939	2.2084	-63.86	-69.827	0.21698	0.21015	0	0.43824
-2.5938	2.2085	-63.894	-69.759	0.21588	0.20915	0	0.43672
-2.5937	2.2086	-63.915	-69.799	0.21478	0.20814	0	0.43521
-2.5936	2.2087	-63.839	-69.83	0.21368	0.20713	0	0.4337
-2.5935	2.2088	-63.885	-69.753	0.21259	0.20612	0	0.43218
-2.5934	2.2089	-63.924	-69.845	0.21149	0.20512	0	0.43067
-2.5933	2.2089	-63.881	-69.729	0.21039	0.20411	0	0.42916
-2.5932	2.209	-63.854	-69.823	0.2093	0.2031	0	0.42765
-2.5931	2.2091	-63.842	-69.811	0.20821	0.20209	0	0.42614
-2.593	2.2092	-63.875	-69.769	0.20711	0.20109	0	0.42463
-2.5929	2.2093	-63.854	-69.939	0.20602	0.20008	0	0.42311
-2.5928	2.2094	-63.729	-69.787	0.20493	0.19907	0	0.4216
-2.5927	2.2095	-63.827	-69.72	0.20384	0.19806	0	0.42009
-2.5926	2.2095	-63.827	-69.842	0.20275	0.19706	0	0.41858
-2.5925	2.2096	-63.976	-69.888	0.20167	0.19605	0	0.41707
-2.5924	2.2097	-63.936	-69.766	0.20058	0.19504	0	0.41556
-2.5923	2.2098	-63.766	-69.79	0.1995	0.19404	0	0.41406
-2.5922	2.2099	-63.836	-69.717	0.19841	0.19303	0	0.41255
-2.5921	2.21	-63.762	-69.842	0.19733	0.19202	0	0.41104
-2.592	2.2101	-63.979	-69.848	0.19625	0.19102	0	0.40953
-2.5919	2.2101	-63.967	-69.878	0.19517	0.19001	0	0.40803
-2.5918	2.2102	-63.93	-69.885	0.1941	0.18901	0	0.40652
-2.5918	2.2103	-64.126	-69.927	0.19302	0.18801	0	0.40501
-2.5917	2.2104	-64.04	-69.817	0.19195	0.18701	0	0.40351
-2.5916	2.2105	-63.997	-69.866	0.19088	0.186	0	0.402
-2.5915	2.2106	-64.141	-69.778	0.18981	0.185	0	0.4005
-2.5914	2.2106	-64.113	-69.762	0.18874	0.184	0	0.39899
-2.5913	2.2107	-63.955	-69.863	0.18767	0.183	0	0.39749
-2.5912	2.2108	-64.046	-69.909	0.1866	0.18201	0	0.39599
-2.5911	2.2109	-63.93	-69.946	0.18554	0.18101	0	0.39448
-2.591	2.211	-64.043	-69.778	0.18448	0.18001	0	0.39298
-2.5909	2.2111	-64.101	-69.921	0.18342	0.17902	0	0.39148
-2.5908	2.2112	-63.997	-69.897	0.18236	0.17802	0	0.38998
-2.5907	2.2112	-64.016	-69.827	0.18131	0.17703	0	0.38848
-2.5906	2.2113	-63.903	-69.973	0.18025	0.17604	0	0.38698
-2.5905	2.2114	-63.891	-69.817	0.1792	0.17505	0	0.38548
-2.5904	2.2115	-63.958	-69.781	0.17815	0.17406	0	0.38399
-2.5903	2.2116	-63.869	-69.851	0.1771	0.17307	0	0.38249
-2.5902	2.2117	-63.833	-70.004	0.17606	0.17208	0	0.38099
-2.5901	2.2118	-63.573	-69.982	0.17501	0.1711	0	0.3795
-2.59	2.2118	-63.653	-69.796	0.17397	0.17011	0	0.378
-2.5899	2.2119	-63.659	-69.814	0.17293	0.16913	0	0.37651
-2.5898	2.212	-63.561	-69.909	0.1719	0.16815	0	0.37502
-2.5897	2.2121	-63.665	-69.869	0.16719	0.16719	0	0.37352
-2.5896	2.2122	-63.595	-69.939	0.16622	0.16622	0	0.37203
-2.5895	2.2123	-63.546	-69.814	0.16524	0.16524	0	0.37054
-2.5894	2.2123	-63.567	-69.83	0.16427	0.16427	0	0.36905
-2.5893	2.2124	-63.436	-69.915	0.16329	0.16329	0	0.36756
-2.5892	2.2125	-63.448	-69.918	0.16232	0.16232	0	0.36608
-2.5891	2.2126	-63.613	-69.961	0.16135	0.16135	0	0.36459
-2.589	2.2127	-63.463	-69.903	0.16038	0.16038	0	0.3631
-2.5889	2.2128	-63.524	-70.022	0.15942	0.15942	0	0.36162
-2.5888	2.2129	-63.485	-69.952	0.15846	0.15846	0	0.36013
-2.5887	2.2129	-63.405	-69.988	0.15749	0.15749	0	0.35865
-2.5886	2.213	-63.509	-69.979	0.15653	0.15653	0	0.35717
-2.5885	2.2131	-63.469	-70.037	0.15558	0.15558	0	0.35569
-2.5884	2.2132	-63.479	-69.878	0.15462	0.15462	0	0.35421
-2.5883	2.2133	-63.479	-69.973	0.15367	0.15367	0	0.35273
-2.5882	2.2134	-63.323	-70.086	0.15271	0.15271	0	0.35125
-2.5881	2.2135	-63.61	-69.979	0.15177	0.15177	0	0.34978
-2.588	2.2135	-63.607	-69.964	0.15082	0.15082	0	0.3483
-2.5879	2.2136	-63.531	-69.924	0.14987	0.14987	0	0.34683
-2.5878	2.2137	-63.564	-69.985	0.14893	0.14893	0	0.34536
-2.5877	2.2138	-63.543	-69.885	0.14799	0.14799	0	0.34388
-2.5876	2.2139	-63.613	-69.943	0.14705	0.14705	0	0.34241
-2.5875	2.214	-63.668	-69.869	0.14611	0.14611	0	0.34094
-2.5874	2.214	-63.534	-69.891	0.14518	0.14518	0	0.33948
-2.5873	2.2141	-63.701	-69.912	0.14425	0.14425	0	0.33801
-2.5872	2.2142	-63.729	-69.906	0.14332	0.14332	0	0.33655
-2.5871	2.2143	-63.613	-69.936	0.14239	0.14239	0	0.33508
-2.587	2.2144	-63.634	-69.891	0.14147	0.14147	0	0.33362
-2.5869	2.2145	-63.68	-69.817	0.14055	0.14055	0	0.33216
-2.5868	2.2146	-63.708	-69.863	0.13963	0.13963	0	0.3307
-2.5867	2.2146	-63.741	-69.811	0.13871	0.13871	0	0.32924
-2.5866	2.2147	-63.64	-69.854	0.1378	0.1378	0	0.32779
-2.5865	2.2148	-63.726	-69.869	0.13689	0.13689	0	0.32633
-2.5864	2.2149	-63.662	-69.888	0.13598	0.13598	0	0.32488
-2.5863	2.215	-63.717	-69.787	0.13507	0.13507	0	0.32343
-2.5862	2.2151	-63.83	-69.811	0.13417	0.13417	0	0.32197
-2.5861	2.2152	-63.701	-69.766	0.13327	0.13327	0	0.32053
-2.586	2.2152	-63.726	-69.915	0.13237	0.13237	0	0.31908
-2.5859	2.2153	-63.888	-69.796	0.13148	0.13148	0	0.31763
-2.5858	2.2154	-63.756	-69.97	0.13059	0.13059	0	0.31619
-2.5857	2.2155	-63.836	-69.927	0.1297	0.1297	0	0.31146
-2.5856	2.2156	-63.952	-69.872	0.12881	0.12881	0	0.31007
-2.5855	2.2157	-63.787	-69.903	0.12793	0.12793	0	0.30868
-2.5854	2.2158	-63.857	-69.924	0.12705	0.12705	0	0.30729
-2.5853	2.2158	-63.836	-69.988	0.12617	0.12617	0	0.3059
-2.5852	2.2159	-63.875	-69.936	0.12529	0.12529	0	0.30451
-2.5851	2.216	-63.888	-69.912	0.12442	0.12442	0	0.30313
-2.585	2.2161	-63.692	-69.97	0.12355	0.12355	0	0.30174
-2.5849	2.2162	-63.866	-70.04	0.12269	0.12269	0	0.30368
-2.5848	2.2163	-63.769	-70.071	0.12183	0.12183	0	0.30234
-2.5847	2.2164	-63.704	-70.025	0.12097	0.12097	0	0.30101
-2.5846	2.2164	-63.723	-69.976	0.12011	0.12011	0	0.29968
-2.5845	2.2165	-63.607	-70.074	0.11926	0.11926	0	0.29836
-2.5844	2.2166	-63.643	-69.994	0.11841	0.11841	0	0.29703
-2.5843	2.2167	-63.543	-70.016	0.11756	0.11756	0	0.29571
-2.5842	2.2168	-63.442	-69.97	0.11671	0.11671	0	0.29439
-2.5841	2.2169	-63.509	-69.97	0.11587	0.11587	0	0.29307
-2.584	2.217	-63.448	-69.93	0.11504	0.11504	0	0.29176
-2.5839	2.217	-63.369	-70	0.1142	0.1142	0	0.29376
-2.5838	2.2171	-63.442	-70.074	0.11337	0.11337	0	0.2925
-2.5837	2.2172	-63.332	-70.037	0.11254	0.11254	0	0.29124
-2.5836	2.2173	-63.469	-70.071	0.11172	0.11172	0	0.28999
-2.5835	2.2174	-63.491	-70.058	0.1109	0.1109	0	0.28873
-2.5834	2.2175	-63.491	-70.013	0.11008	0.11008	0	0.28748
-2.5833	2.2175	-63.589	-70.11	0.10926	0.10926	0	0.28624
-2.5832	2.2176	-63.546	-70.104	0.10845	0.10845	0	0.285
-2.5831	2.2177	-63.622	-70.11	0.10764	0.10764	0	0.28376
-2.583	2.2178	-63.613	-70.08	0.10684	0.10684	0	0.28252
-2.5829	2.2179	-63.543	-70.013	0.10604	0.10604	0	0.28129
-2.5828	2.218	-63.762	-70.153	0.10524	0.10524	0	0.28006
-2.5827	2.2181	-63.68	-70.181	0.10445	0.10445	0	0.27883
-2.5826	2.2181	-63.68	-70.135	0.10366	0.10366	0	0.27761
-2.5825	2.2182	-63.769	-69.997	0.10287	0.10287	0	0.27639
-2.5824	2.2183	-63.796	-70.071	0.10208	0.10208	0	0.27518
-2.5823	2.2184	-63.762	-70.092	0.1013	0.1013	0	0.27397
-2.5822	2.2185	-63.793	-70.022	0.10053	0.10053	0	0.27276
-2.5821	2.2186	-63.793	-70.11	0.099752	0.099752	0	0.27156
-2.582	2.2187	-63.915	-70.086	0.098982	0.098982	0	0.27036
-2.5819	2.2187	-63.827	-70.04	0.098215	0.098215	0	0.26916
-2.5818	2.2188	-63.726	-70.028	0.097452	0.097452	0	0.26797
-2.5817	2.2189	-63.845	-70.028	0.096693	0.096693	0	0.26678
-2.5816	2.219	-63.808	-70.19	0.095936	0.095936	0	0.26559
-2.5815	2.2191	-63.991	-70.058	0.095184	0.095184	0	0.26441
-2.5814	2.2192	-63.781	-70.187	0.094435	0.094435	0	0.26324
-2.5813	2.2193	-63.842	-70.181	0.09369	0.09369	0	0.26206
-2.5812	2.2193	-63.906	-70.138	0.092948	0.092948	0	0.2609
-2.5811	2.2194	-63.921	-70.116	0.092209	0.092209	0	0.25973
-2.581	2.2195	-63.842	-70.242	0.091475	0.091475	0	0.25857
-2.5809	2.2196	-63.833	-70.165	0.090744	0.090744	0	0.25742
-2.5808	2.2197	-63.811	-70.132	0.090016	0.090016	0	0.25627
-2.5807	2.2198	-63.888	-70.184	0.089292	0.089292	0	0.25512
-2.5806	2.2199	-63.897	-70.071	0.088572	0.088572	0	0.25398
-2.5805	2.2199	-63.714	-70.171	0.087856	0.087856	0	0.25284
-2.5804	2.22	-63.762	-70.174	0.087143	0.087143	0	0.25171
-2.5803	2.2201	-63.738	-70.126	0.086433	0.086433	0	0.25058
-2.5802	2.2202	-63.781	-70.153	0.085728	0.085728	0	0.24945
-2.5801	2.2203	-63.888	-70.116	0.085026	0.085026	0	0.24833
-2.58	2.2204	-63.753	-70.113	0.084327	0.084327	0	0.24722
-2.5799	2.2205	-63.759	-70.062	0.083633	0.083633	0	0.24611
-2.5798	2.2205	-63.753	-70.193	0.082942	0.082942	0	0.245
-2.5797	2.2206	-63.723	-70.174	0.082254	0.082254	0	0.2439
-2.5796	2.2207	-63.753	-70.132	0.081571	0.081571	0	0.24281
-2.5795	2.2208	-63.741	-70.107	0.08089	0.08089	0	0.24172
-2.5794	2.2209	-63.775	-70.052	0.080214	0.080214	0	0.24063
-2.5793	2.221	-63.631	-70.08	0.079541	0.079541	0	0.23955
-2.5792	2.2211	-63.686	-69.997	0.078873	0.078873	0	0.23848
-2.5791	2.2211	-63.747	-70.074	0.078207	0.078207	0	0.23741
-2.579	2.2212	-63.732	-70.159	0.077546	0.077546	0	0.23634
-2.5789	2.2213	-63.866	-70.013	0.076888	0.076888	0	0.23528
-2.5788	2.2214	-63.701	-70.113	0.076233	0.076233	0	0.23423
-2.5787	2.2215	-63.79	-70.141	0.075583	0.075583	0	0.23318
-2.5786	2.2216	-63.845	-70.016	0.074936	0.074936	0	0.23213
-2.5785	2.2217	-63.82	-69.949	0.074293	0.074293	0	0.23109
-2.5784	2.2217	-63.753	-69.946	0.073653	0.073653	0	0.23006
-2.5783	2.2218	-63.677	-69.979	0.073018	0.073018	0	0.22903
-2.5782	2.2219	-63.704	-69.979	0.072386	0.072386	0	0.22801
-2.5781	2.222	-63.802	-69.869	0.071757	0.071757	0	0.22699
-2.578	2.2221	-63.723	-69.97	0.071133	0.071133	0	0.22598
-2.5779	2.2222	-63.894	-69.845	0.070512	0.070512	0	0.22498
-2.5778	2.2223	-63.762	-69.875	0.069894	0.069894	0	0.22398
-2.5777	2.2223	-63.711	-69.817	0.069281	0.069281	0	0.22298
-2.5776	2.2224	-63.784	-69.851	0.068671	0.068671	0	0.22199
-2.5775	2.2225	-63.735	-69.881	0.068064	0.068064	0	0.22101
-2.5774	2.2226	-63.885	-69.839	0.067462	0.067462	0	0.22004
-2.5773	2.2227	-63.845	-69.967	0.066863	0.066863	0	0.21907
-2.5772	2.2228	-63.808	-70.022	0.066268	0.066268	0	0.2181
-2.5771	2.2229	-63.83	-69.967	0.065676	0.065676	0	0.21714
-2.577	2.2229	-63.875	-70.007	0.065088	0.065088	0	0.21619
-2.5769	2.223	-63.875	-69.979	0.064504	0.064504	0	0.21524
-2.5768	2.2231	-63.817	-69.915	0.063923	0.063923	0	0.2143
-2.5767	2.2232	-63.86	-69.86	0.063346	0.063346	0	0.21337
-2.5766	2.2233	-63.909	-69.827	0.062773	0.062773	0	0.21244
-2.5765	2.2234	-63.918	-69.872	0.062203	0.062203	0	0.21152
-2.5764	2.2235	-63.762	-70	0.061637	0.061637	0	0.21061
-2.5763	2.2236	-63.851	-69.976	0.061075	0.061075	0	0.2097
-2.5762	2.2236	-63.793	-69.982	0.060516	0.060516	0	0.2088
-2.5761	2.2237	-63.973	-69.888	0.059961	0.059961	0	0.2079
-2.576	2.2238	-63.881	-69.997	0.05941	0.05941	0	0.20701
-2.5759	2.2239	-63.808	-69.982	0.058862	0.058862	0	0.20284
-2.5758	2.224	-63.964	-69.906	0.058318	0.058318	0	0.20202
-2.5757	2.2241	-63.918	-69.912	0.057777	0.057777	0	0.20119
-2.5756	2.2242	-63.909	-69.9	0.05724	0.05724	0	0.20038
-2.5755	2.2242	-63.973	-69.994	0.056706	0.056706	0	0.19957
-2.5754	2.2243	-63.802	-70.04	0.056176	0.056176	0	0.19877
-2.5753	2.2244	-63.909	-70.162	0.05565	0.05565	0	0.19797
-2.5752	2.2245	-64	-70.049	0.055127	0.055127	0	0.19718
-2.5751	2.2246	-63.946	-70.058	0.054608	0.054608	0	0.1964
-2.575	2.2247	-64.116	-70.071	0.054092	0.054092	0	0.19562
-2.5749	2.2248	-64.043	-70.065	0.05358	0.05358	0	0.19485
-2.5748	2.2248	-63.973	-70.08	0.053071	0.053071	0	0.19408
-2.5747	2.2249	-64.071	-69.991	0.052566	0.052566	0	0.19332
-2.5746	2.225	-63.933	-70.01	0.052065	0.052065	0	0.19257
-2.5745	2.2251	-64.043	-69.933	0.051567	0.051567	0	0.19183
-2.5744	2.2252	-63.961	-69.976	0.051072	0.051072	0	0.19109
-2.5743	2.2253	-63.985	-69.988	0.050581	0.050581	0	0.19036
-2.5742	2.2254	-64	-69.988	0.050093	0.050093	0	0.18963
-2.5741	2.2254	-63.833	-70.062	0.049609	0.049609	0	0.18891
-2.574	2.2255	-64.074	-70.12	0.049129	0.049129	0	0.1882
-2.5739	2.2256	-64.135	-69.943	0.048651	0.048651	0	0.1875
-2.5738	2.2257	-63.97	-69.781	0.048178	0.048178	0	0.1868
-2.5737	2.2258	-64.092	-69.891	0.047707	0.047707	0	0.18611
-2.5736	2.2259	-64.129	-69.854	0.04724	0.04724	0	0.18542
-2.5735	2.226	-64.046	-69.787	0.046777	0.046777	0	0.18475
-2.5734	2.226	-64.156	-69.946	0.046317	0.046317	0	0.18408
-2.5733	2.2261	-64.107	-69.772	0.04586	0.04586	0	0.18341
-2.5732	2.2262	-64.132	-69.787	0.045407	0.045407	0	0.18276
-2.5731	2.2263	-64.15	-69.897	0.044957	0.044957	0	0.18211
-2.573	2.2264	-64.095	-69.683	0.04451	0.04451	0	0.18147
-2.5729	2.2265	-64.199	-69.946	0.044067	0.044067	0	0.18084
-2.5728	2.2266	-64.177	-69.869	0.043627	0.043627	0	0.18021
-2.5727	2.2267	-64.171	-69.897	0.04319	0.04319	0	0.17959
-2.5726	2.2267	-64.235	-69.823	0.042757	0.042757	0	0.17898
-2.5725	2.2268	-63.991	-69.759	0.042327	0.042327	0	0.17838
-2.5724	2.2269	-64.138	-69.839	0.0419	0.0419	0	0.17778
-2.5723	2.227	-64.098	-69.894	0.041476	0.041476	0	0.17719
-2.5722	2.2271	-64.022	-69.708	0.041056	0.041056	0	0.17661
-2.5721	2.2272	-64.354	-69.866	0.040639	0.040639	0	0.17604
-2.572	2.2273	-64.058	-69.86	0.040225	0.040225	0	0.17547
-2.5719	2.2273	-64.15	-69.894	0.039815	0.039815	0	0.17492
-2.5718	2.2274	-64.144	-69.857	0.039408	0.039408	0	0.17437
-2.5717	2.2275	-63.97	-69.82	0.039004	0.039004	0	0.17383
-2.5716	2.2276	-64.113	-69.827	0.038603	0.038603	0	0.17329
-2.5715	2.2277	-64.132	-69.808	0.038205	0.038205	0	0.17277
-2.5714	2.2278	-64.046	-69.839	0.03781	0.03781	0	0.17225
-2.5713	2.2279	-64.135	-69.802	0.037419	0.037419	0	0.17174
-2.5712	2.2279	-64.034	-69.805	0.037031	0.037031	0	0.17124
-2.5711	2.228	-64.107	-69.894	0.036645	0.036645	0	0.17074
-2.571	2.2281	-64.168	-69.894	0.036263	0.036263	0	0.17026
-2.5709	2.2282	-64.016	-69.906	0.035884	0.035884	0	0.16978
-2.5708	2.2283	-64.132	-69.814	0.035508	0.035508	0	0.16931
-2.5707	2.2284	-64.025	-69.744	0.035136	0.035136	0	0.16885
-2.5706	2.2285	-63.915	-69.866	0.034766	0.034766	0	0.1684
-2.5705	2.2285	-64.232	-69.863	0.034399	0.034399	0	0.16795
-2.5704	2.2286	-63.903	-69.991	0.034035	0.034035	0	0.16751
-2.5703	2.2287	-63.991	-69.805	0.033675	0.033675	0	0.16709
-2.5702	2.2288	-64.043	-69.857	0.033317	0.033317	0	0.16667
-2.5701	2.2289	-63.918	-69.814	0.032962	0.032962	0	0.16626
-2.57	2.229	-63.967	-69.946	0.03261	0.03261	0	0.16586
-2.5699	2.2291	-63.903	-69.994	0.032262	0.032262	0	0.16546
-2.5698	2.2292	-63.979	-69.888	0.031916	0.031916	0	0.16508
-2.5697	2.2292	-64.019	-69.845	0.031573	0.031573	0	0.1647
-2.5696	2.2293	-63.799	-69.936	0.031233	0.031233	0	0.16433
-2.5695	2.2294	-63.903	-69.973	0.030895	0.030895	0	0.16397
-2.5694	2.2295	-63.958	-69.97	0.030561	0.030561	0	0.16362
-2.5693	2.2296	-63.805	-69.897	0.03023	0.03023	0	0.16328
-2.5692	2.2297	-63.881	-69.909	0.029901	0.029901	0	0.16295
-2.5691	2.2298	-63.753	-69.97	0.029576	0.029576	0	0.16263
-2.569	2.2298	-63.68	-69.936	0.029253	0.029253	0	0.16231
-2.5689	2.2299	-63.823	-69.842	0.028933	0.028933	0	0.16201
-2.5688	2.23	-63.668	-69.814	0.028615	0.028615	0	0.16171
-2.5687	2.2301	-63.732	-69.86	0.028301	0.028301	0	0.16142
-2.5686	2.2302	-63.784	-69.964	0.027989	0.027989	0	0.16114
-2.5685	2.2303	-63.659	-70.007	0.02768	0.02768	0	0.16087
-2.5684	2.2304	-63.766	-69.912	0.027374	0.027374	0	0.16061
-2.5683	2.2304	-63.552	-69.881	0.02707	0.02707	0	0.16036
-2.5682	2.2305	-63.595	-69.976	0.026769	0.026769	0	0.16012
-2.5681	2.2306	-63.778	-69.958	0.026471	0.026471	0	0.15988
-2.568	2.2307	-63.564	-69.848	0.026176	0.026176	0	0.15966
-2.5679	2.2308	-63.756	-69.872	0.025883	0.025883	0	0.15944
-2.5678	2.2309	-63.674	-69.985	0.025593	0.025593	0	0.15924
-2.5677	2.231	-63.686	-69.939	0.025305	0.025305	0	0.15904
-2.5676	2.2311	-63.909	-69.921	0.02502	0.02502	0	0.15885
-2.5675	2.2311	-63.799	-69.961	0.024738	0.024738	0	0.15868
-2.5674	2.2312	-63.827	-70.037	0.024458	0.024458	0	0.15851
-2.5673	2.2313	-63.866	-70.028	0.024181	0.024181	0	0.15835
-2.5672	2.2314	-63.769	-69.921	0.023906	0.023906	0	0.1582
-2.5671	2.2315	-63.866	-70.013	0.023634	0.023634	0	0.15806
-2.567	2.2316	-63.836	-69.964	0.023364	0.023364	0	0.15793
-2.5669	2.2317	-63.802	-69.714	0.023097	0.023097	0	0.15781
-2.5668	2.2317	-64.043	-69.759	0.022833	0.022833	0	0.15769
-2.5667	2.2318	-63.735	-69.958	0.02257	0.02257	0	0.15759
-2.5666	2.2319	-63.97	-69.988	0.022311	0.022311	0	0.1575
-2.5665	2.232	-63.961	-69.888	0.022053	0.022053	0	0.15742
-2.5664	2.2321	-63.845	-69.903	0.021799	0.021799	0	0.15734
-2.5663	2.2322	-63.946	-69.946	0.021546	0.021546	0	0.15728
-2.5662	2.2323	-63.943	-69.848	0.021296	0.021296	0	0.15723
-2.5661	2.2324	-63.9	-69.83	0.021048	0.021048	0	0.15718
-2.566	2.2324	-64.049	-69.961	0.020803	0.020803	0	0.15715
-2.5659	2.2325	-63.946	-69.735	0.02056	0.02056	0	0.15712
-2.5658	2.2326	-64.031	-69.872	0.02032	0.02032	0	0.15711
-2.5657	2.2327	-64.062	-69.833	0.020081	0.020081	0	0.1571
-2.5656	2.2328	-63.949	-69.927	0.019845	0.019845	0	0.15711
-2.5655	2.2329	-64.123	-69.885	0.019612	0.019612	0	0.15712
-2.5654	2.233	-64.068	-69.93	0.01938	0.01938	0	0.15714
-2.5653	2.233	-64.08	-69.903	0.019151	0.019151	0	0.15718
-2.5652	2.2331	-63.985	-69.845	0.018924	0.018924	0	0.15722
-2.5651	2.2332	-63.985	-69.924	0.018699	0.018699	0	0.15728
-2.565	2.2333	-64.08	-69.961	0.018477	0.018477	0	0.15734
-2.5649	2.2334	-64.062	-69.943	0.018257	0.018257	0	0.15741
-2.5648	2.2335	-64.016	-69.866	0.018038	0.018038	0	0.1575
-2.5647	2.2336	-64.171	-69.933	0.017822	0.017822	0	0.15759
-2.5646	2.2337	-63.946	-69.915	0.017609	0.017609	0	0.1577
-2.5645	2.2337	-64.089	-69.869	0.017397	0.017397	0	0.15781
-2.5644	2.2338	-64.205	-69.897	0.017187	0.017187	0	0.15793
-2.5644	2.2339	-63.936	-69.903	0.01698	0.01698	0	0.15807
-2.5643	2.234	-64.208	-69.881	0.016775	0.016775	0	0.15821
-2.5642	2.2341	-64.135	-69.891	0.016571	0.016571	0	0.15836
-2.5641	2.2342	-64.181	-69.939	0.01637	0.01637	0	0.15853
-2.564	2.2343	-64.144	-69.958	0.016171	0.016171	0	0.1587
-2.5639	2.2343	-64.235	-69.927	0.015974	0.015974	0	0.15889
-2.5638	2.2344	-64.242	-69.9	0.015779	0.015779	0	0.15908
-2.5637	2.2345	-64.257	-69.943	0.015585	0.015585	0	0.15928
-2.5636	2.2346	-64.144	-69.985	0.015394	0.015394	0	0.1595
-2.5635	2.2347	-64.242	-69.909	0.015205	0.015205	0	0.15972
-2.5634	2.2348	-64.239	-69.927	0.015018	0.015018	0	0.15996
-2.5633	2.2349	-64.208	-69.949	0.014832	0.014832	0	0.1602
-2.5632	2.235	-64.141	-70.01	0.014649	0.014649	0	0.15717
-2.5631	2.235	-64.11	-69.885	0.014468	0.014468	0	0.15749
-2.563	2.2351	-64.232	-70.043	0.014288	0.014288	0	0.15781
-2.5629	2.2352	-64.266	-69.939	0.01411	0.01411	0	0.15815
-2.5628	2.2353	-64.162	-69.912	0.013934	0.013934	0	0.15849
-2.5627	2.2354	-64.174	-69.964	0.01376	0.01376	0	0.15884
-2.5626	2.2355	-64.153	-70.037	0.013588	0.013588	0	0.1592
-2.5625	2.2356	-64.272	-69.976	0.013418	0.013418	0	0.15958
-2.5624	2.2357	-64.3	-70.007	0.013249	0.013249	0	0.15996
-2.5623	2.2357	-64.257	-70.007	0.013083	0.013083	0	0.16035
-2.5622	2.2358	-64.232	-69.845	0.012918	0.012918	0	0.16075
-2.5621	2.2359	-64.388	-69.985	0.012754	0.012754	0	0.16116
-2.562	2.236	-64.187	-69.93	0.012593	0.012593	0	0.16158
-2.5619	2.2361	-64.266	-69.921	0.012433	0.012433	0	0.16201
-2.5618	2.2362	-64.26	-69.933	0.012275	0.012275	0	0.16245
-2.5617	2.2363	-64.29	-69.881	0.012119	0.012119	0	0.1629
-2.5616	2.2363	-64.367	-69.958	0.011964	0.011964	0	0.16336
-2.5615	2.2364	-64.409	-70.007	0.011811	0.011811	0	0.16383
-2.5614	2.2365	-64.245	-70.034	0.01166	0.01166	0	0.1643
-2.5613	2.2366	-64.333	-69.97	0.011511	0.011511	0	0.16479
-2.5612	2.2367	-64.153	-70.019	0.011363	0.011363	0	0.16529
-2.5611	2.2368	-64.29	-69.93	0.011216	0.011216	0	0.1658
-2.561	2.2369	-64.29	-69.903	0.011071	0.011071	0	0.16632
-2.5609	2.237	-64.223	-69.891	0.010928	0.010928	0	0.16684
-2.5608	2.237	-64.33	-69.762	0.010787	0.010787	0	0.16738
-2.5607	2.2371	-64.138	-69.781	0.010647	0.010647	0	0.16793
-2.5606	2.2372	-64.306	-69.83	0.010508	0.010508	0	0.16848
-2.5605	2.2373	-64.254	-69.9	0.010372	0.010372	0	0.16905
-2.5604	2.2374	-64.153	-69.866	0.010236	0.010236	0	0.16963
-2.5603	2.2375	-64.15	-69.781	0.010102	0.010102	0	0.17021
-2.5602	2.2376	-64.19	-69.881	0.00997	0.00997	0	0.17081
-2.5601	2.2377	-64.132	-69.915	0.0098391	0.0098391	0	0.17141
-2.56	2.2377	-64.284	-69.885	0.0097098	0.0097098	0	0.17203
-2.5599	2.2378	-64.239	-69.833	0.0095818	0.0095818	0	0.17265
-2.5598	2.2379	-64.275	-69.823	0.0094554	0.0094554	0	0.17329
-2.5597	2.238	-64.257	-69.756	0.0093304	0.0093304	0	0.17393
-2.5596	2.2381	-64.187	-69.805	0.0092068	0.0092068	0	0.17459
-2.5595	2.2382	-64.217	-69.86	0.0090846	0.0090846	0	0.17525
-2.5594	2.2383	-64.211	-69.881	0.0089638	0.0089638	0	0.17593
-2.5593	2.2383	-64.193	-69.839	0.0088444	0.0088444	0	0.17661
-2.5592	2.2384	-64.3	-69.961	0.0087264	0.0087264	0	0.1773
-2.5591	2.2385	-64.19	-69.9	0.0086097	0.0086097	0	0.17801
-2.559	2.2386	-64.211	-69.872	0.0084944	0.0084944	0	0.17872
-2.5589	2.2387	-64.303	-69.991	0.0083804	0.0083804	0	0.17944
-2.5588	2.2388	-64.22	-69.979	0.0082678	0.0082678	0	0.18017
-2.5587	2.2389	-64.235	-69.894	0.0081564	0.0081564	0	0.18091
-2.5586	2.239	-64.345	-69.924	0.0080464	0.0080464	0	0.18167
-2.5585	2.239	-64.266	-69.976	0.0079376	0.0079376	0	0.18243
-2.5584	2.2391	-64.373	-69.985	0.0078301	0.0078301	0	0.1832
-2.5583	2.2392	-64.223	-69.881	0.0077239	0.0077239	0	0.18398
-2.5582	2.2393	-64.333	-69.985	0.007619	0.007619	0	0.18477
-2.5581	2.2394	-64.336	-69.918	0.0075152	0.0075152	0	0.18557
-2.558	2.2395	-64.254	-70.068	0.0074127	0.0074127	0	0.18638
-2.5579	2.2396	-64.293	-69.878	0.0073115	0.0073115	0	0.1872
-2.5578	2.2397	-64.318	-69.863	0.0072114	0.0072114	0	0.18803
-2.5577	2.2397	-64.272	-69.869	0.0071125	0.0071125	0	0.18886
-2.5576	2.2398	-64.22	-69.842	0.0070148	0.0070148	0	0.18971
-2.5575	2.2399	-64.242	-69.927	0.0069183	0.0069183	0	0.19057
-2.5574	2.24	-64.376	-69.982	0.0068229	0.0068229	0	0.19143
-2.5573	2.2401	-64.361	-70.019	0.0067287	0.0067287	0	0.19231
-2.5572	2.2402	-64.309	-70.01	0.0066356	0.0066356	0	0.1932
-2.5571	2.2403	-64.376	-70.077	0.0065436	0.0065436	0	0.19409
-2.557	2.2404	-64.303	-69.991	0.0064528	0.0064528	0	0.195
-2.5569	2.2404	-64.318	-70.031	0.006363	0.006363	0	0.19591
-2.5568	2.2405	-64.428	-69.915	0.0062744	0.0062744	0	0.19683
-2.5567	2.2406	-64.388	-69.976	0.0061868	0.0061868	0	0.19777
-2.5566	2.2407	-64.464	-69.964	0.0061003	0.0061003	0	0.19871
-2.5565	2.2408	-64.538	-69.93	0.0060149	0.0060149	0	0.19966
-2.5564	2.2409	-64.428	-69.912	0.0059305	0.0059305	0	0.20062
-2.5563	2.241	-64.522	-69.949	0.0058471	0.0058471	0	0.20159
-2.5562	2.2411	-64.379	-70.004	0.0057648	0.0057648	0	0.20257
-2.5561	2.2411	-64.458	-69.939	0.0056835	0.0056835	0	0.20356
-2.556	2.2412	-64.48	-69.946	0.0056032	0.0056032	0	0.20455
-2.5559	2.2413	-64.397	-70.028	0.0055239	0.0055239	0	0.20556
-2.5558	2.2414	-64.504	-70.04	0.0054456	0.0054456	0	0.20658
-2.5557	2.2415	-64.535	-69.979	0.0053683	0.0053683	0	0.2076
-2.5556	2.2416	-64.324	-69.988	0.0052919	0.0052919	0	0.20864
-2.5555	2.2417	-64.403	-69.991	0.0052165	0.0052165	0	0.20968
-2.5554	2.2418	-64.254	-70.071	0.005142	0.005142	0	0.21073
-2.5553	2.2418	-64.211	-69.979	0.0050685	0.0050685	0	0.21179
-2.5552	2.2419	-64.214	-70.004	0.0049959	0.0049959	0	0.21286
-2.5551	2.242	-63.918	-69.967	0.0049242	0.0049242	0	0.21394
-2.555	2.2421	-63.949	-70.013	0.0048535	0.0048535	0	0.21503
-2.5549	2.2422	-63.946	-69.994	0.0047836	0.0047836	0	0.21612
-2.5548	2.2423	-63.836	-69.909	0.0047146	0.0047146	0	0.21723
-2.5547	2.2424	-63.891	-69.909	0.0046465	0.0046465	0	0.21834
-2.5546	2.2425	-63.787	-69.869	0.0045792	0.0045792	0	0.21947
-2.5545	2.2425	-63.863	-69.918	0.0045129	0.0045129	0	0.2206
-2.5544	2.2426	-63.915	-69.836	0.0044473	0.0044473	0	0.22174
-2.5543	2.2427	-63.747	-69.793	0.0043827	0.0043827	0	0.22289
-2.5542	2.2428	-63.833	-69.817	0.0043188	0.0043188	0	0.22404
-2.5541	2.2429	-63.924	-69.671	0.0042558	0.0042558	0	0.22521
-2.554	2.243	-63.967	-69.732	0.0041936	0.0041936	0	0.22638
-2.5539	2.2431	-64.013	-69.604	0.0041322	0.0041322	0	0.22757
-2.5538	2.2432	-63.997	-69.643	0.0040716	0.0040716	0	0.22876
-2.5537	2.2432	-63.994	-69.665	0.0040118	0.0040118	0	0.22996
-2.5536	2.2433	-64.092	-69.521	0.0039527	0.0039527	0	0.23116
-2.5535	2.2434	-64.004	-69.555	0.0038945	0.0038945	0	0.23238
-2.5534	2.2435	-64.107	-69.622	0.003837	0.003837	0	0.2336
-2.5533	2.2436	-64.016	-69.531	0.0037802	0.0037802	0	0.23484
-2.5532	2.2437	-64.043	-69.555	0.0037242	0.0037242	0	0.23608
-2.5531	2.2438	-64.165	-69.457	0	0	0	0.23733
-2.553	2.2439	-64.034	-69.491	0	0	0	0.23858
-2.5529	2.2439	-64.171	-69.415	0	0	0	0.23985
-2.5528	2.244	-64.202	-69.277	0	0	0	0.24112
-2.5527	2.2441	-63.994	-69.311	0	0	0	0.2424
-2.5526	2.2442	-64.098	-69.155	0	0	0	0.24369
-2.5525	2.2443	-64.107	-69.155	0	0	0	0.24498
-2.5524	2.2444	-64.086	-69.115	0	0	0	0.24629
-2.5523	2.2445	-64.193	-68.954	0	0	0	0.2476
-2.5522	2.2446	-63.933	-68.948	0	0	0	0.24892
-2.5521	2.2446	-64.162	-68.89	0	0	0	0.25024
-2.552	2.2447	-64.052	-68.899	0	0	0	0.25158
-2.5519	2.2448	-63.991	-68.853	0	0	0	0.25292
-2.5518	2.2449	-64.016	-68.887	0	0	0	0.25427
-2.5517	2.245	-64.068	-68.743	0	0	0	0.25562
-2.5516	2.2451	-64.132	-68.749	0	0	0	0.25699
-2.5515	2.2452	-64.077	-68.792	0	0	0	0.25836
-2.5514	2.2453	-64.025	-68.761	0	0	0	0.25973
-2.5513	2.2453	-64.062	-68.774	0	0	0	0.26112
-2.5512	2.2454	-64.12	-68.813	0	0	0	0.26251
-2.5511	2.2455	-64.019	-68.786	0	0	0	0.26391
-2.551	2.2456	-64.196	-68.682	0	0	0	0.26531
-2.5509	2.2457	-64.162	-68.67	0	0	0	0.26673
-2.5508	2.2458	-64.135	-68.652	0	0	0	0.26815
-2.5507	2.2459	-64.153	-68.725	0	0	0	0.26957
-2.5506	2.246	-64.153	-68.694	0	0	0	0.271
-2.5505	2.246	-64.242	-68.746	0	0	0	0.27244
-2.5504	2.2461	-64.104	-68.685	0	0	0	0.27389
-2.5503	2.2462	-64.165	-68.707	0	0	0	0.27534
-2.5502	2.2463	-64.232	-68.826	0	0	0	0.2768
-2.5501	2.2464	-64.101	-68.771	0	0	0	0.27827
-2.55	2.2465	-64.196	-68.746	0	0	0	0.27974
-2.5499	2.2466	-64.12	-68.719	0	0	0	0.28121
-2.5498	2.2467	-64.004	-68.835	0	0	0	0.2827
-2.5497	2.2467	-64.055	-68.71	0	0	0	0.28419
-2.5496	2.2468	-63.946	-68.749	0	0	0	0.28568
-2.5495	2.2469	-63.872	-68.783	0	0	0	0.28718
-2.5494	2.247	-63.97	-68.877	0	0	0	0.28869
-2.5493	2.2471	-63.924	-68.749	0	0	0	0.2902
-2.5492	2.2472	-63.936	-68.801	0	0	0	0.29172
-2.5491	2.2473	-63.943	-68.7	0	0	0	0.29324
-2.549	2.2474	-63.955	-68.871	0	0	0	0.29477
-2.5489	2.2474	-63.988	-68.774	0	0	0	0.29631
-2.5488	2.2475	-63.836	-68.884	0	0	0	0.29785
-2.5487	2.2476	-63.915	-68.771	0	0	0	0.29939
-2.5486	2.2477	-63.836	-68.798	0	0	0	0.30095
-2.5485	2.2478	-63.775	-68.743	0	0	0	0.3025
-2.5484	2.2479	-63.82	-68.798	0	0	0	0.30406
-2.5483	2.248	-63.909	-68.92	0	0	0	0.30563
-2.5482	2.2481	-63.875	-68.758	0	0	0	0.3072
-2.5481	2.2481	-63.952	-68.896	0	0	0	0.30877
-2.548	2.2482	-63.915	-68.856	0	0	0	0.31035
-2.5479	2.2483	-63.924	-68.902	0	0	0	0.31194
-2.5478	2.2484	-63.921	-68.868	0	0	0	0.31353
-2.5477	2.2485	-63.939	-68.899	0	0	0	0.31512
-2.5476	2.2486	-63.915	-68.902	0	0	0	0.31672
-2.5475	2.2487	-64	-68.963	0	0	0	0.31832
-2.5474	2.2488	-63.982	-68.777	0	0	0	0.31993
-2.5473	2.2489	-63.915	-68.789	0	0	0	0.32154
-2.5472	2.2489	-64.092	-68.859	0	0	0	0.32316
-2.5471	2.249	-64	-68.929	0	0	0	0.32478
-2.547	2.2491	-64.049	-68.844	0	0	0	0.3264
-2.5469	2.2492	-64.196	-68.74	0	0	0	0.32802
-2.5468	2.2493	-64.177	-68.835	0	0	0	0.32966
-2.5467	2.2494	-64.15	-68.884	0	0	0	0.33129
-2.5466	2.2495	-64.123	-68.841	0	0	0	0.33293
-2.5465	2.2496	-64.147	-68.783	0	0	0	0.33457
-2.5464	2.2496	-64.184	-68.734	0	0	0	0.33621
-2.5463	2.2497	-64.232	-68.743	0	0	0	0.33786
-2.5462	2.2498	-64.208	-68.816	0	0	0	0.33951
-2.5461	2.2499	-64.135	-68.737	0	0	0	0.34116
-2.546	2.25	-64.138	-68.713	0	0	0	0.34282
-2.5459	2.2501	-64.272	-68.771	0	0	0	0.34448
-2.5458	2.2502	-64.12	-68.716	0	0	0	0.34614
-2.5457	2.2503	-64.104	-68.713	0	0	0	0.34781
-2.5456	2.2503	-64.205	-68.752	0	0	0	0.34947
-2.5455	2.2504	-64.123	-68.588	0	0	0	0.35114
-2.5454	2.2505	-64.126	-68.664	0	0	0	0.35282
-2.5453	2.2506	-64.129	-68.679	0	0	0	0.35449
-2.5452	2.2507	-64.049	-68.719	0	0	0	0.35617
-2.5451	2.2508	-64.077	-68.792	0	0	0	0.35785
-2.545	2.2509	-64.217	-68.612	0	0	0	0.35953
-2.5449	2.251	-63.997	-68.792	0	0	0	0.36121
-2.5448	2.2511	-64.208	-68.655	0	0	0	0.36289
-2.5447	2.2511	-64.135	-68.835	0	0	0	0.36458
-2.5446	2.2512	-64.174	-68.755	0	0	0	0.36627
-2.5445	2.2513	-64.129	-68.813	0	0	0	0.36796
-2.5444	2.2514	-64.214	-68.853	0	0	0	0.36965
-2.5443	2.2515	-64.168	-68.874	0	0	0	0.37134
-2.5442	2.2516	-64.025	-68.728	0	0	0	0.37303
-2.5441	2.2517	-64.165	-68.871	0	0	0	0.37473
-2.544	2.2518	-64.232	-68.722	0	0	0	0.37642
-2.5439	2.2518	-64.132	-68.862	0	0	0	0.37812
-2.5438	2.2519	-64.208	-68.841	0	0	0	0.37982
-2.5437	2.252	-64.19	-68.826	0	0	0	0.38152
-2.5436	2.2521	-64.153	-68.679	0	0	0	0.38322
-2.5435	2.2522	-64.278	-68.697	0	0	0	0.38491
-2.5434	2.2523	-64.138	-68.7	0	0	0	0.38661
-2.5433	2.2524	-64.211	-68.685	0	0	0	0.38831
-2.5432	2.2525	-64.26	-68.801	0	0	0	0.39001
-2.5431	2.2526	-64.15	-68.719	0	0	0	0.39171
-2.543	2.2526	-64.275	-68.636	0	0	0	0.39341
-2.5429	2.2527	-64.19	-68.737	0	0	0	0.39511
-2.5428	2.2528	-64.217	-68.823	0	0	0	0.39681
-2.5427	2.2529	-64.336	-68.743	0	0	0	0.39851
-2.5426	2.253	-64.211	-68.765	0	0	0	0.40021
-2.5425	2.2531	-64.284	-68.816	0	0	0	0.40191
-2.5424	2.2532	-64.388	-68.795	0	0	0	0.40361
-2.5423	2.2533	-64.278	-68.813	0	0	0	0.4053
-2.5422	2.2533	-64.321	-68.859	0	0	0	0.407
-2.5421	2.2534	-64.168	-68.807	0	0	0	0.40869
-2.542	2.2535	-64.226	-68.914	0	0	0	0.41039
-2.5419	2.2536	-64.425	-68.829	0	0	0	0.41208
-2.5418	2.2537	-64.248	-68.868	0	0	0	0.41377
-2.5417	2.2538	-64.348	-68.96	0	0	0	0.41546
-2.5416	2.2539	-64.293	-68.874	0	0	0	0.41715
-2.5415	2.254	-64.287	-68.981	0	0	0	0.41884
-2.5414	2.2541	-64.4	-68.99	0	0	0	0.42052
-2.5413	2.2541	-64.248	-68.987	0	0	0	0.42221
-2.5412	2.2542	-64.306	-68.954	0	0	0	0.42389
-2.5411	2.2543	-64.382	-68.963	0	0	0	0.42557
-2.541	2.2544	-64.272	-69.024	0	0	0	0.42724
-2.5409	2.2545	-64.4	-68.996	0	0	0	0.42892
-2.5408	2.2546	-64.306	-69.073	0	0	0	0.43059
-2.5407	2.2547	-64.248	-69.03	0	0	0	0.43226
-2.5406	2.2548	-64.437	-69.033	0	0	0	0.43393
-2.5405	2.2548	-64.199	-69.088	0	0	0	0.43559
-2.5404	2.2549	-64.373	-69.03	0	0	0	0.43725
-2.5403	2.255	-64.367	-69.003	0	0	0	0.43891
-2.5402	2.2551	-64.293	-69.006	0	0	0	0.44057
-2.5401	2.2552	-64.431	-68.993	0	0	0	0.44222
-2.54	2.2553	-64.397	-68.859	0	0	0	0.44387
-2.5399	2.2554	-64.385	-68.929	0	0	0	0.44551
-2.5398	2.2555	-64.574	-69.006	0	0	0	0.44716
-2.5397	2.2556	-64.309	-68.932	0	0	0	0.44879
-2.5396	2.2556	-64.467	-69.012	0	0	0	0.45043
-2.5395	2.2557	-64.486	-68.957	0	0	0	0.45206
-2.5394	2.2558	-64.412	-69.024	0	0	0	0.45369
-2.5393	2.2559	-64.593	-68.975	0	0	0	0.45531
-2.5392	2.256	-64.367	-68.984	0	0	0	0.45693
-2.5391	2.2561	-64.458	-69.057	0	0	0	0.45854
-2.539	2.2562	-64.565	-69.173	0	0	0	0.46015
-2.5389	2.2563	-64.303	-69.051	0	0	0	0.46176
-2.5388	2.2564	-64.501	-68.996	0	0	0	0.46336
-2.5387	2.2564	-64.4	-69.1	0	0	0	0.46496
-2.5386	2.2565	-64.3	-69.106	0	0	0	0.46655
-2.5385	2.2566	-64.528	-69.097	0	0	0	0.46814
-2.5384	2.2567	-64.412	-69.186	0	0	0	0.46972
-2.5383	2.2568	-64.361	-69.192	0	0	0	0.47129
-2.5382	2.2569	-64.4	-69.045	0	0	0	0.47287
-2.5381	2.257	-64.315	-69.088	0	0	0	0.47443
-2.538	2.2571	-64.406	-69.067	0	0	0	0.47599
-2.5379	2.2571	-64.461	-69.1	0	0	0	0.47755
-2.5378	2.2572	-64.437	-69.067	0	0	0	0.47581
-2.5377	2.2573	-64.446	-69.125	0	0	0	0.4774
-2.5376	2.2574	-64.26	-69.128	0	0	0	0.47899
-2.5375	2.2575	-64.452	-69.064	0	0	0	0.48057
-2.5374	2.2576	-64.559	-69.082	0	0	0	0.48214
-2.5373	2.2577	-64.327	-69.128	0	0	0	0.4837
-2.5372	2.2578	-64.605	-69.195	0	0	0	0.48526
-2.5371	2.2579	-64.461	-69.183	0	0	0	0.48681
-2.537	2.2579	-64.403	-69.137	0	0	0	0.48836
-2.537	2.258	-64.538	-69.015	0	0	0	0.4899
-2.5369	2.2581	-64.33	-69.009	0	0	0	0.49143
-2.5368	2.2582	-64.51	-69.027	0	0	0	0.49295
-2.5367	2.2583	-64.431	-69.012	0	0	0	0.49446
-2.5366	2.2584	-64.193	-69.036	0	0	0	0.49597
-2.5365	2.2585	-64.437	-69.085	0	0	0	0.49747
-2.5364	2.2586	-64.397	-68.954	0	0	0	0.49896
-2.5363	2.2587	-64.547	-69.033	0	0	0	0.50044
-2.5362	2.2587	-64.586	-68.917	0	0	0	0.50192
-2.5361	2.2588	-64.364	-68.966	0	0	0	0.50339
-2.536	2.2589	-64.516	-69.073	0	0	0	0.50485
-2.5359	2.259	-64.623	-69.1	0	0	0	0.5063
-2.5358	2.2591	-64.477	-69.015	0	0	0	0.50774
-2.5357	2.2592	-64.577	-69.042	0	0	0	0.50917
-2.5356	2.2593	-64.522	-69.048	0	0	0	0.5106
-2.5355	2.2594	-64.556	-69.088	0	0	0	0.51201
-2.5354	2.2595	-64.602	-69.045	0	0	0	0.51342
-2.5353	2.2595	-64.519	-69.033	0	0	0	0.51482
-2.5352	2.2596	-64.611	-69.112	0	0	0	0.51621
-2.5351	2.2597	-64.641	-69.18	0	0	0	0.51759
-2.535	2.2598	-64.538	-69.112	0	0	0	0.51896
-2.5349	2.2599	-64.712	-69.149	0	0	0	0.52032
-2.5348	2.26	-64.55	-69.122	0	0	0	0.52168
-2.5347	2.2601	-64.733	-69.109	0	0	0	0.52302
-2.5346	2.2602	-64.654	-69.054	0	0	0	0.52435
-2.5345	2.2603	-64.654	-69.152	0	0	0	0.52568
-2.5344	2.2603	-64.721	-69.039	0	0	0	0.52699
-2.5343	2.2604	-64.748	-69.167	0	0	0	0.5283
-2.5342	2.2605	-64.687	-69.103	0	0	0	0.52959
-2.5341	2.2606	-64.806	-69.177	0	0	0	0.53088
-2.534	2.2607	-64.644	-69.216	0	0	0	0.53215
-2.5339	2.2608	-64.635	-69.213	0	0	0	0.53342
-2.5338	2.2609	-64.565	-69.112	0	0	0	0.53467
-2.5337	2.261	-64.672	-69.018	0	0	0	0.53591
-2.5336	2.2611	-64.675	-69.057	0	0	0	0.53715
-2.5335	2.2611	-64.669	-69.1	0	0	0	0.53837
-2.5334	2.2612	-64.574	-69.134	0	0	0	0.53958
-2.5333	2.2613	-64.727	-69.155	0	0	0	0.54078
-2.5332	2.2614	-64.602	-69.14	0	0	0	0.54198
-2.5331	2.2615	-64.605	-69.021	0	0	0	0.54316
-2.533	2.2616	-64.715	-68.938	0	0	0	0.54432
-2.5329	2.2617	-64.504	-69.167	0	0	0	0.54548
-2.5328	2.2618	-64.675	-69.067	0	0	0	0.54663
-2.5327	2.2619	-64.638	-69.158	0	0	0	0.54777
-2.5326	2.2619	-64.657	-69.183	0	0	0	0.54889
-2.5325	2.262	-64.806	-69.134	0	0	0	0.55
-2.5324	2.2621	-64.525	-69.048	0	0	0	0.55111
-2.5323	2.2622	-64.568	-68.896	0	0	0	0.5522
-2.5322	2.2623	-64.538	-69.064	0	0	0	0.55327
-2.5321	2.2624	-64.376	-68.99	0	0	0	0.55434
-2.532	2.2625	-64.589	-69.054	0	0	0	0.5554
-2.5319	2.2626	-64.498	-69.033	0	0	0	0.55644
-2.5318	2.2627	-64.489	-68.938	0	0	0	0.55747
-2.5317	2.2627	-64.535	-68.856	0	0	0	0.55849
-2.5316	2.2628	-64.397	-68.832	0	0	0	0.5595
-2.5315	2.2629	-64.516	-68.914	0	0	0	0.5605
-2.5314	2.263	-64.416	-68.88	0	0	0	0.56148
-2.5313	2.2631	-64.306	-68.752	0	0	0	0.56245
-2.5312	2.2632	-64.367	-68.786	0	0	0	0.56341
-2.5311	2.2633	-64.397	-68.856	0	0	0	0.56436
-2.531	2.2634	-64.467	-68.795	0	0	0	0.56529
-2.5309	2.2635	-64.391	-68.789	0	0	0	0.56621
-2.5308	2.2635	-64.382	-68.838	0	0	0	0.56712
-2.5307	2.2636	-64.434	-68.923	0	0	0	0.56802
-2.5306	2.2637	-64.351	-68.826	0	0	0	0.5689
-2.5305	2.2638	-64.391	-68.96	0	0	0	0.56977
-2.5304	2.2639	-64.373	-68.823	0	0	0	0.57063
-2.5303	2.264	-64.44	-68.89	0	0	0	0.57148
-2.5302	2.2641	-64.449	-68.948	0	0	0	0.57231
-2.5301	2.2642	-64.419	-68.789	0	0	0	0.57313
-2.53	2.2643	-64.318	-68.847	0	0	0	0.57394
-2.5299	2.2643	-64.422	-68.823	0	0	0	0.57473
-2.5298	2.2644	-64.455	-68.816	0	0	0	0.57551
-2.5297	2.2645	-64.297	-68.868	0	0	0	0.57628
-2.5296	2.2646	-64.373	-68.871	0	0	0	0.57703
-2.5295	2.2647	-64.364	-68.972	0	0	0	0.57777
-2.5294	2.2648	-64.431	-68.926	0	0	0	0.5785
-2.5293	2.2649	-64.492	-68.945	0	0	0	0.57921
-2.5292	2.265	-64.348	-68.926	0	0	0	0.57991
-2.5291	2.2651	-64.528	-68.884	0	0	0	0.5806
-2.529	2.2651	-64.58	-68.942	0	0	0	0.58127
-2.5289	2.2652	-64.489	-68.896	0	0	0	0.58193
-2.5288	2.2653	-64.431	-68.841	0	0	0	0.58257
-2.5287	2.2654	-64.467	-68.807	0	0	0	0.58321
-2.5286	2.2655	-64.416	-68.868	0	0	0	0.58382
-2.5285	2.2656	-64.486	-68.81	0	0	0	0.58443
-2.5284	2.2657	-64.437	-68.838	0	0	0	0.58502
-2.5283	2.2658	-64.397	-68.801	0	0	0	0.58559
-2.5282	2.2659	-64.544	-68.838	0	0	0	0.58616
-2.5281	2.266	-64.535	-68.938	0	0	0	0.5867
-2.528	2.266	-64.467	-68.877	0	0	0	0.58724
-2.5279	2.2661	-64.388	-68.938	0	0	0	0.58776
-2.5278	2.2662	-64.434	-68.935	0	0	0	0.58826
-2.5277	2.2663	-64.47	-68.85	0	0	0	0.58876
-2.5276	2.2664	-64.422	-68.871	0	0	0	0.58923
-2.5275	2.2665	-64.522	-68.795	0	0	0	0.5897
-2.5274	2.2666	-64.559	-68.865	0	0	0	0.59015
-2.5273	2.2667	-64.531	-68.938	0	0	0	0.59058
-2.5272	2.2668	-64.385	-68.945	0	0	0	0.591
-2.5271	2.2668	-64.48	-68.917	0	0	0	0.59141
-2.527	2.2669	-64.474	-68.771	0	0	0	0.5918
-2.5269	2.267	-64.614	-68.868	0	0	0	0.59218
-2.5268	2.2671	-64.51	-68.887	0	0	0	0.59254
-2.5267	2.2672	-64.586	-68.786	0	0	0	0.59289
-2.5266	2.2673	-64.583	-68.832	0	0	0	0.59322
-2.5265	2.2674	-64.513	-68.807	0	0	0	0.59354
-2.5264	2.2675	-64.541	-68.841	0	0	0	0.59385
-2.5263	2.2676	-64.428	-68.829	0	0	0	0.59414
-2.5262	2.2677	-64.556	-68.853	0	0	0	0.59441
-2.5261	2.2677	-64.455	-68.81	0	0	0	0.59467
-2.526	2.2678	-64.431	-68.853	0	0	0	0.59492
-2.5259	2.2679	-64.474	-68.884	0	0	0	0.59515
-2.5258	2.268	-64.446	-68.88	0	0	0	0.59537
-2.5257	2.2681	-64.437	-68.884	0	0	0	0.59557
-2.5256	2.2682	-64.504	-68.81	0	0	0	0.59576
-2.5255	2.2683	-64.501	-68.902	0	0	0	0.59593
-2.5254	2.2684	-64.498	-68.942	0	0	0	0.59609
-2.5253	2.2685	-64.455	-68.899	0	0	0	0.59623
-2.5252	2.2685	-64.498	-68.835	0	0	0	0.59636
-2.5251	2.2686	-64.51	-68.844	0	0	0	0.59647
-2.525	2.2687	-64.443	-68.89	0	0	0	0.59657
-2.5249	2.2688	-64.281	-69.076	0	0	0	0.59666
-2.5248	2.2689	-64.449	-69	0	0	0	0.59672
-2.5247	2.269	-64.309	-69.057	0	0	0	0.59678
-2.5246	2.2691	-64.376	-68.948	0	0	0	0.59682
-2.5245	2.2692	-64.351	-68.945	0	0	0	0.59684
-2.5244	2.2693	-64.336	-68.984	0	0	0	0.59685
-2.5243	2.2694	-64.214	-69.091	0	0	0	0.59685
-2.5242	2.2694	-64.174	-69.051	0	0	0	0.59683
-2.5241	2.2695	-64.144	-69.048	0	0	0	0.5968
-2.524	2.2696	-64.055	-68.938	0	0	0	0.59675
-2.5239	2.2697	-64	-68.865	0	0	0	0.59668
-2.5238	2.2698	-64.116	-68.816	0	0	0	0.5966
-2.5237	2.2699	-64.08	-69.024	0	0	0	0.59651
-2.5236	2.27	-64.004	-68.938	0	0	0	0.5964
-2.5235	2.2701	-63.985	-68.963	0	0	0	0.59628
-2.5234	2.2702	-64.065	-68.963	0	0	0	0.59614
-2.5233	2.2702	-64.12	-68.957	0	0	0	0.59599
-2.5232	2.2703	-64.126	-68.966	0	0	0	0.59582
-2.5231	2.2704	-64.019	-68.905	0	0	0	0.59564
-2.523	2.2705	-63.897	-68.935	0	0	0	0.59544
-2.5229	2.2706	-63.982	-68.957	0	0	0	0.59523
-2.5228	2.2707	-63.878	-68.896	0	0	0	0.59501
-2.5227	2.2708	-63.881	-68.905	0	0	0	0.59477
-2.5226	2.2709	-64.08	-68.896	0	0	0	0.59451
-2.5225	2.271	-63.973	-68.844	0	0	0	0.59424
-2.5224	2.2711	-64.126	-68.826	0	0	0	0.59396
-2.5223	2.2711	-63.946	-68.89	0	0	0	0.59366
-2.5222	2.2712	-63.994	-68.844	0	0	0	0.59334
-2.5221	2.2713	-64.04	-68.935	0	0	0	0.59302
-2.522	2.2714	-64.028	-68.969	0	0	0	0.59267
-2.5219	2.2715	-64.153	-68.954	0	0	0	0.59232
-2.5218	2.2716	-64.068	-68.89	0	0	0	0.59194
-2.5217	2.2717	-64.095	-68.945	0	0	0	0.59156
-2.5216	2.2718	-64.135	-68.954	0	0	0	0.59116
-2.5215	2.2719	-64.043	-68.926	0	0	0	0.59074
-2.5214	2.2719	-64.138	-68.942	0	0	0	0.59031
-2.5213	2.272	-64.196	-68.938	0	0	0	0.58987
-2.5212	2.2721	-64.101	-68.847	0	0	0	0.58941
-2.5211	2.2722	-64.129	-68.868	0	0	0	0.58894
-2.521	2.2723	-64.08	-68.819	0	0	0	0.58845
-2.5209	2.2724	-64.177	-68.871	0	0	0	0.58795
-2.5208	2.2725	-64.306	-68.804	0	0	0	0.58744
-2.5207	2.2726	-64.123	-68.798	0	0	0	0.58691
-2.5206	2.2727	-64.223	-68.734	0	0	0	0.58637
-2.5205	2.2728	-64.223	-68.655	0	0	0	0.58581
-2.5204	2.2728	-64.22	-68.639	0	0	0	0.58524
-2.5203	2.2729	-64.269	-68.649	0	0	0	0.58465
-2.5202	2.273	-64.205	-68.728	0	0	0	0.58405
-2.5201	2.2731	-64.318	-68.652	0	0	0	0.58344
-2.52	2.2732	-64.379	-68.694	0	0	0	0.58282
-2.5199	2.2733	-64.354	-68.697	0	0	0	0.58218
-2.5198	2.2734	-64.425	-68.731	0	0	0	0.58152
-2.5197	2.2735	-64.379	-68.694	0	0	0	0.58085
-2.5196	2.2736	-64.3	-68.78	0	0	0	0.58017
-2.5195	2.2737	-64.309	-68.679	0	0	0	0.57948
-2.5194	2.2737	-64.367	-68.597	0	0	0	0.57877
-2.5193	2.2738	-64.373	-68.664	0	0	0	0.57805
-2.5192	2.2739	-64.489	-68.52	0	0	0	0.57731
-2.5191	2.274	-64.318	-68.569	0	0	0	0.57656
-2.519	2.2741	-64.229	-68.502	0	0	0	0.5758
-2.5189	2.2742	-64.422	-68.331	0	0	0	0.57503
-2.5188	2.2743	-64.348	-68.191	0	0	0	0.57424
-2.5187	2.2744	-64.538	-68.288	0	0	0	0.57344
-2.5186	2.2745	-64.394	-68.09	0	0	0	0.57262
-2.5185	2.2746	-64.382	-68.09	0	0	0	0.5718
-2.5184	2.2746	-64.403	-68.111	0	0	0	0.57096
-2.5183	2.2747	-64.379	-68.16	0	0	0	0.5701
-2.5182	2.2748	-64.434	-68.127	0	0	0	0.56924
-2.5181	2.2749	-64.461	-68.148	0	0	0	0.56836
-2.518	2.275	-64.44	-68.133	0	0	0	0.56746
-2.5179	2.2751	-64.544	-68.121	0	0	0	0.56656
-2.5178	2.2752	-64.528	-68.066	0	0	0	0.56564
-2.5177	2.2753	-64.474	-68.182	0	0	0	0.56471
-2.5176	2.2754	-64.419	-68.243	0	0	0	0.56377
-2.5175	2.2755	-64.278	-68.206	0	0	0	0.56282
-2.5174	2.2755	-64.4	-68.23	0	0	0	0.56185
-2.5173	2.2756	-64.367	-68.133	0	0	0	0.56087
-2.5172	2.2757	-64.409	-68.258	0	0	0	0.55988
-2.5171	2.2758	-64.419	-68.218	0	0	0	0.55888
-2.517	2.2759	-64.37	-68.264	0	0	0	0.55786
-2.5169	2.276	-64.257	-68.273	0	0	0	0.55683
-2.5168	2.2761	-64.303	-68.215	0	0	0	0.5558
-2.5167	2.2762	-64.226	-68.2	0	0	0	0.55474
-2.5166	2.2763	-64.287	-68.243	0	0	0	0.55368
-2.5165	2.2764	-64.202	-68.334	0	0	0	0.55261
-2.5164	2.2764	-64.153	-68.27	0	0	0	0.55152
-2.5163	2.2765	-64.052	-68.31	0	0	0	0.55042
-2.5162	2.2766	-64.004	-68.304	0	0	0	0.54931
-2.5161	2.2767	-64.055	-68.368	0	0	0	0.54819
-2.516	2.2768	-63.955	-68.325	0	0	0	0.54706
-2.5159	2.2769	-63.866	-68.465	0	0	0	0.54592
-2.5158	2.277	-63.86	-68.401	0	0	0	0.54477
-2.5157	2.2771	-63.875	-68.285	0	0	0	0.5436
-2.5156	2.2772	-63.9	-68.362	0	0	0	0.54243
-2.5155	2.2773	-63.875	-68.42	0	0	0	0.54124
-2.5154	2.2773	-63.653	-68.417	0	0	0	0.54004
-2.5153	2.2774	-63.631	-68.472	0	0	0	0.53883
-2.5152	2.2775	-63.769	-68.508	0	0	0	0.53761
-2.5151	2.2776	-63.604	-68.392	0	0	0	0.53638
-2.515	2.2777	-63.677	-68.417	0	0	0	0.53514
-2.5149	2.2778	-63.698	-68.426	0	0	0	0.53389
-2.5148	2.2779	-63.613	-68.456	0	0	0	0.53263
-2.5147	2.278	-63.744	-68.502	0	0	0	0.53136
-2.5146	2.2781	-63.659	-68.407	0	0	0	0.53008
-2.5145	2.2782	-63.656	-68.462	0	0	0	0.52879
-2.5144	2.2782	-63.65	-68.264	0	0	0	0.52749
-2.5143	2.2783	-63.656	-68.411	0	0	0	0.52618
-2.5142	2.2784	-63.72	-68.414	0	0	0	0.52486
-2.5141	2.2785	-63.766	-68.533	0	0	0	0.52353
-2.514	2.2786	-63.726	-68.472	0	0	0	0.52219
-2.5139	2.2787	-63.744	-68.441	0	0	0	0.52084
-2.5138	2.2788	-63.646	-68.554	0	0	0	0.51948
-2.5137	2.2789	-63.634	-68.475	0	0	0	0.51811
-2.5136	2.279	-63.689	-68.563	0	0	0	0.51674
-2.5135	2.2791	-63.537	-68.545	0	0	0	0.51535
-2.5134	2.2792	-63.604	-68.441	0	0	0	0.51395
-2.5133	2.2792	-63.622	-68.658	0	0	0	0.51255
-2.5132	2.2793	-63.604	-68.456	0	0	0	0.51114
-2.5131	2.2794	-63.637	-68.597	0	0	0	0.50971
-2.513	2.2795	-63.555	-68.624	0	0	0	0.50828
-2.5129	2.2796	-63.576	-68.664	0	0	0	0.50684
-2.5128	2.2797	-63.567	-68.646	0	0	0	0.5054
-2.5127	2.2798	-63.531	-68.597	0	0	0	0.50394
-2.5126	2.2799	-63.598	-68.578	0	0	0	0.50248
-2.5125	2.28	-63.515	-68.673	0	0	0	0.501
-2.5124	2.2801	-63.497	-68.618	0	0	0	0.49952
-2.5123	2.2801	-63.579	-68.697	0	0	0	0.49804
-2.5122	2.2802	-63.589	-68.673	0	0	0	0.49654
-2.5121	2.2803	-63.485	-68.679	0	0	0	0.49504
-2.512	2.2804	-63.537	-68.752	0	0	0	0.49352
-2.5119	2.2805	-63.473	-68.667	0	0	0	0.492
-2.5118	2.2806	-63.579	-68.823	0	0	0	0.49048
-2.5117	2.2807	-63.561	-68.691	0	0	0	0.48894
-2.5116	2.2808	-63.488	-68.664	0	0	0	0.4874
-2.5115	2.2809	-63.723	-68.624	0	0	0	0.48585
-2.5114	2.281	-63.595	-68.694	0	0	0	0.4843
-2.5113	2.2811	-63.625	-68.679	0	0	0	0.48273
-2.5112	2.2811	-63.604	-68.844	0	0	0	0.48117
-2.5111	2.2812	-63.485	-68.85	0	0	0	0.47959
-2.511	2.2813	-63.619	-68.737	0	0	0	0.47801
-2.5109	2.2814	-63.579	-68.823	0	0	0	0.47642
-2.5108	2.2815	-63.521	-68.691	0	0	0	0.47482
-2.5107	2.2816	-63.595	-68.865	0	0	0	0.47322
-2.5106	2.2817	-63.524	-68.771	0	0	0	0.47161
-2.5105	2.2818	-63.555	-68.819	0	0	0	0.46999
-2.5104	2.2819	-63.592	-68.926	0	0	0	0.46837
-2.5103	2.282	-63.466	-68.844	0	0	0	0.46674
-2.5102	2.282	-63.558	-68.993	0	0	0	0.46511
-2.5101	2.2821	-63.341	-68.887	0	0	0	0.46347
-2.51	2.2822	-63.387	-68.923	0	0	0	0.46183
-2.5099	2.2823	-63.512	-68.938	0	0	0	0.46018
-2.5098	2.2824	-63.463	-68.865	0	0	0	0.45852
-2.5097	2.2825	-63.503	-68.948	0	0	0	0.45686
-2.5096	2.2826	-63.607	-69.012	0	0	0	0.4552
-2.5096	2.2827	-63.485	-69.033	0	0	0	0.45352
-2.5095	2.2828	-63.604	-69.07	0	0	0	0.45185
-2.5094	2.2829	-63.613	-69.006	0	0	0	0.45017
-2.5093	2.283	-63.61	-69.152	0	0	0	0.44848
-2.5092	2.283	-63.878	-69.085	0	0	0	0.44679
-2.5091	2.2831	-63.692	-69.097	0	0	0	0.44841
-2.509	2.2832	-63.793	-69.097	0	0	0	0.44676
-2.5089	2.2833	-63.744	-69.189	0	0	0	0.44511
-2.5088	2.2834	-63.665	-69.1	0	0	0	0.44345
-2.5087	2.2835	-63.872	-69.128	0	0	0	0.44179
-2.5086	2.2836	-63.717	-69.164	0	0	0	0.44012
-2.5085	2.2837	-63.814	-69.173	0	0	0	0.43845
-2.5084	2.2838	-63.915	-69.103	0	0	0	0.43678
-2.5083	2.2839	-63.714	-69.125	0	0	0	0.43511
-2.5082	2.2839	-63.747	-69.064	0	0	0	0.43343
-2.5081	2.284	-63.747	-69.198	0	0	0	0.43175
-2.508	2.2841	-63.796	-69.091	0	0	0	0.43006
-2.5079	2.2842	-63.946	-69.143	0	0	0	0.42838
-2.5078	2.2843	-63.866	-69.152	0	0	0	0.42669
-2.5077	2.2844	-63.82	-69.183	0	0	0	0.425
-2.5076	2.2845	-64.031	-69.088	0	0	0	0.4233
-2.5075	2.2846	-63.772	-69.158	0	0	0	0.42161
-2.5074	2.2847	-63.894	-69.201	0	0	0	0.41991
-2.5073	2.2848	-63.86	-69.195	0	0	0	0.41821
-2.5072	2.2849	-63.903	-69.21	0	0	0	0.41651
-2.5071	2.2849	-63.979	-69.146	0	0	0	0.41481
-2.507	2.285	-63.72	-69.128	0	0	0	0.4131
-2.5069	2.2851	-63.857	-69.277	0	0	0	0.41139
-2.5068	2.2852	-63.924	-69.198	0	0	0	0.40968
-2.5067	2.2853	-63.881	-69.238	0	0	0	0.40797
-2.5066	2.2854	-63.958	-69.286	0	0	0	0.40626
-2.5065	2.2855	-63.921	-69.158	0	0	0	0.40455
-2.5064	2.2856	-63.897	-69.231	0	0	0	0.40284
-2.5063	2.2857	-64.052	-69.192	0	0	0	0.40112
-2.5062	2.2858	-63.793	-69.323	0	0	0	0.3994
-2.5061	2.2859	-63.888	-69.204	0	0	0	0.39769
-2.506	2.2859	-63.933	-69.247	0	0	0	0.39597
-2.5059	2.286	-63.943	-69.277	0	0	0	0.39425
-2.5058	2.2861	-64.077	-69.149	0	0	0	0.39254
-2.5057	2.2862	-63.912	-69.225	0	0	0	0.39082
-2.5056	2.2863	-63.979	-69.25	0	0	0	0.3891
-2.5055	2.2864	-64.098	-69.228	0	0	0	0.38738
-2.5054	2.2865	-63.988	-69.137	0	0	0	0.38566
-2.5053	2.2866	-64.055	-69.247	0	0	0	0.38394
-2.5052	2.2867	-64.165	-69.195	0	0	0	0.38222
-2.5051	2.2868	-64.12	-69.317	0	0	0	0.3805
-2.505	2.2869	-64.26	-69.28	0	0	0	0.37879
-2.5049	2.2869	-64.126	-69.35	0	0	0	0.37707
-2.5048	2.287	-64.089	-69.36	0	0	0	0.37535
-2.5047	2.2871	-64.284	-69.28	0	0	0	0.37364
-2.5046	2.2872	-64.138	-69.366	0	0	0	0.37192
-2.5045	2.2873	-64.263	-69.314	0	0	0	0.37021
-2.5044	2.2874	-64.177	-69.323	0	0	0	0.36849
-2.5043	2.2875	-64.126	-69.344	0	0	0	0.36678
-2.5042	2.2876	-64.281	-69.32	0	0	0	0.36507
-2.5041	2.2877	-64.08	-69.448	0	0	0	0.36336
-2.504	2.2878	-64.177	-69.299	0	0	0	0.36165
-2.5039	2.2879	-64.113	-69.485	0	0	0	0.35994
-2.5038	2.2879	-63.964	-69.393	0	0	0	0.35824
-2.5037	2.288	-64.095	-69.469	0	0	0	0.35653
-2.5036	2.2881	-64.019	-69.436	0	0	0	0.35483
-2.5035	2.2882	-64.101	-69.421	0	0	0	0.35313
-2.5034	2.2883	-64.239	-69.369	0	0	0	0.35143
-2.5033	2.2884	-64.025	-69.524	0	0	0	0.34973
-2.5032	2.2885	-64.187	-69.415	0	0	0	0.34804
-2.5031	2.2886	-64.266	-69.527	0	0	0	0.34635
-2.503	2.2887	-64.028	-69.369	0	0	0	0.34466
-2.5029	2.2888	-64.248	-69.497	0	0	0	0.34297
-2.5028	2.2889	-64.138	-69.32	0	0	0	0.34129
-2.5027	2.2889	-64.12	-69.439	0	0	0	0.3396
-2.5026	2.289	-64.239	-69.564	0	0	0	0.33792
-2.5025	2.2891	-64.077	-69.534	0	0	0	0.33625
-2.5024	2.2892	-64.184	-69.479	0	0	0	0.33457
-2.5023	2.2893	-64.181	-69.39	0	0	0	0.3329
-2.5022	2.2894	-64.104	-69.405	0	0	0	0.33124
-2.5021	2.2895	-64.232	-69.482	0	0	0	0.32957
-2.502	2.2896	-64.104	-69.512	0	0	0	0.32791
-2.5019	2.2897	-64.147	-69.549	0	0	0	0.32625
-2.5018	2.2898	-64.214	-69.366	0	0	0	0.3246
-2.5017	2.2899	-64.113	-69.567	0	0	0	0.32295
-2.5016	2.29	-64.193	-69.546	0	0	0	0.3213
-2.5015	2.29	-64.245	-69.494	0	0	0	0.31966
-2.5014	2.2901	-64.168	-69.497	0	0	0	0.31802
-2.5013	2.2902	-64.272	-69.445	0	0	0	0.31638
-2.5012	2.2903	-64.074	-69.518	0	0	0	0.31475
-2.5011	2.2904	-64.254	-69.579	0	0	0	0.31312
-2.501	2.2905	-64.15	-69.497	0	0	0	0.3115
-2.5009	2.2906	-64.141	-69.543	0	0	0	0.30988
-2.5008	2.2907	-64.275	-69.515	0	0	0	0.30826
-2.5007	2.2908	-64.214	-69.503	0	0	0	0.30665
-2.5006	2.2909	-64.245	-69.546	0	0	0	0.30504
-2.5005	2.291	-64.297	-69.561	0	0	0	0.30344
-2.5004	2.291	-64.226	-69.595	0	0	0	0.30185
-2.5003	2.2911	-64.26	-69.555	0	0	0	0.30025
-2.5002	2.2912	-64.235	-69.592	0	0	0	0.29866
-2.5001	2.2913	-64.074	-69.531	0	0	0	0.29708
-2.5	2.2914	-64.229	-69.561	0	0	0	0.2955
-2.4999	2.2915	-64.229	-69.668	0	0	0	0.29393
-2.4998	2.2916	-64.123	-69.592	0	0	0	0.29236
-2.4997	2.2917	-64.217	-69.595	0	0	0	0.2908
-2.4996	2.2918	-64.101	-69.57	0	0	0	0.28924
-2.4995	2.2919	-64.144	-69.598	0	0	0	0.28769
-2.4994	2.292	-64.055	-69.546	0	0	0	0.28614
-2.4993	2.2921	-64.132	-69.589	0	0	0	0.2846
-2.4992	2.2921	-64.168	-69.589	0	0	0	0.28307
-2.4991	2.2922	-64.113	-69.625	0	0	0	0.28154
-2.499	2.2923	-64.004	-69.619	0	0	0	0.28001
-2.4989	2.2924	-64.147	-69.564	0	0	0	0.27849
-2.4988	2.2925	-64.062	-69.552	0	0	0	0.27698
-2.4987	2.2926	-64.165	-69.656	0	0	0	0.27547
-2.4986	2.2927	-64.107	-69.653	0	0	0	0.27397
-2.4985	2.2928	-64.135	-69.576	0	0	0	0.27248
-2.4984	2.2929	-64.156	-69.674	0	0	0	0.27099
-2.4983	2.293	-64.141	-69.537	0	0	0	0.2695
-2.4982	2.2931	-64.184	-69.83	0	0	0	0.26803
-2.4981	2.2931	-64.171	-69.753	0	0	0	0.26656
-2.498	2.2932	-64.083	-69.68	0	0	0	0.26509
-2.4979	2.2933	-64.275	-69.711	0	0	0	0.26364
-2.4978	2.2934	-64.266	-69.607	0	0	0	0.26218
-2.4977	2.2935	-64.226	-69.701	0	0	0	0.26074
-2.4976	2.2936	-64.254	-69.762	0	0	0	0.2593
-2.4975	2.2937	-64.217	-69.683	0	0	0	0.25787
-2.4974	2.2938	-64.141	-69.695	0	0	0	0.25645
-2.4973	2.2939	-64.126	-69.839	0	0	0	0.25503
-2.4972	2.294	-64.202	-69.836	0	0	0	0.25362
-2.4971	2.2941	-64.211	-69.811	0	0	0	0.25222
-2.497	2.2942	-64.196	-69.72	0	0	0	0.25082
-2.4969	2.2942	-64.162	-69.677	0	0	0	0.24943
-2.4968	2.2943	-64.269	-69.717	0	0	0	0.24805
-2.4967	2.2944	-64.223	-69.698	0	0	0	0.24667
-2.4966	2.2945	-64.324	-69.698	0	0	0	0.2453
-2.4965	2.2946	-64.223	-69.744	0	0	0	0.24394
-2.4964	2.2947	-64.26	-69.701	0	0	0	0.24259
-2.4963	2.2948	-64.354	-69.637	0	0	0	0.24124
-2.4962	2.2949	-64.336	-69.631	0	0	0	0.2399
-2.4961	2.295	-64.26	-69.646	0	0	0	0.23857
-2.496	2.2951	-64.242	-69.656	0	0	0	0.23725
-2.4959	2.2952	-64.382	-69.735	0	0	0	0.23593
-2.4958	2.2953	-64.339	-69.674	0	0	0	0.23463
-2.4957	2.2953	-64.342	-69.723	0	0	0	0.23332
-2.4956	2.2954	-64.297	-69.711	0	0	0	0.23203
-2.4955	2.2955	-64.33	-69.637	0	0	0	0.23075
-2.4954	2.2956	-64.284	-69.848	0	0	0	0.22947
-2.4953	2.2957	-64.104	-69.64	0	0	0	0.2282
-2.4952	2.2958	-64.226	-69.64	0	0	0	0.22694
-2.4951	2.2959	-64.281	-69.677	0	0	0	0.22569
-2.495	2.296	-64.101	-69.665	0	0	0	0.22444
-2.4949	2.2961	-64.226	-69.662	0	0	0	0.2232
-2.4948	2.2962	-64.223	-69.711	0	0	0	0.22197
-2.4947	2.2963	-64.12	-69.616	0	0	0	0.22075
-2.4946	2.2964	-64.229	-69.686	0	0	0	0.21954
-2.4945	2.2964	-64.263	-69.595	0	0	0	0.21834
-2.4944	2.2965	-64.235	-69.692	0	0	0	0.21714
-2.4943	2.2966	-64.138	-69.668	0	0	0	0.21595
-2.4942	2.2967	-64.034	-69.625	0	0	0	0.21477
-2.4941	2.2968	-64.08	-69.683	0	0	0	0.2136
-2.494	2.2969	-64.062	-69.613	0	0	0	0.21244
-2.4939	2.297	-64.007	-69.585	0	0	0	0.21128
-2.4938	2.2971	-63.985	-69.65	0	0	0	0.21014
-2.4937	2.2972	-63.946	-69.65	0	0	0	0.209
-2.4936	2.2973	-63.964	-69.708	0	0	0	0.20787
-2.4935	2.2974	-63.958	-69.573	0	0	0	0.20675
-2.4934	2.2975	-64.034	-69.628	0	0	0	0.20564
-2.4933	2.2975	-63.985	-69.65	0	0	0	0.20454
-2.4932	2.2976	-63.97	-69.595	0	0	0	0.20345
-2.4931	2.2977	-63.814	-69.695	0	0	0	0.20236
-2.493	2.2978	-63.991	-69.631	0	0	0	0.20129
-2.4929	2.2979	-63.875	-69.646	0	0	0	0.20022
-2.4928	2.298	-63.903	-69.659	0	0	0	0.19916
-2.4927	2.2981	-63.933	-69.756	0	0	0	0.19811
-2.4926	2.2982	-63.997	-69.628	0	0	0	0.19707
-2.4925	2.2983	-64.046	-69.772	0	0	0	0.19604
-2.4924	2.2984	-63.97	-69.695	0	0	0	0.19502
-2.4923	2.2985	-64.089	-69.686	0	0	0	0.194
-2.4922	2.2986	-64.199	-69.634	0	0	0	0.193
-2.4921	2.2986	-63.961	-69.714	0	0	0	0.19201
-2.492	2.2987	-64.025	-69.762	0	0	0	0.19102
-2.4919	2.2988	-64.074	-69.735	0	0	0	0.19004
-2.4918	2.2989	-64.11	-69.83	0	0	0	0.18907
-2.4917	2.299	-64.12	-69.793	0	0	0	0.18812
-2.4916	2.2991	-64.04	-69.845	0	0	0	0.18717
-2.4915	2.2992	-64.135	-69.796	0	0	0	0.18623
-2.4914	2.2993	-64.211	-69.817	0	0	0	0.1853
-2.4913	2.2994	-64.101	-69.653	0	0	0	0.18437
-2.4912	2.2995	-64.098	-69.772	0	0	0	0.18346
-2.4911	2.2996	-64.135	-69.93	0	0	0	0.18256
-2.491	2.2997	-64.165	-69.82	0	0	0	0.18166
-2.4909	2.2997	-64.184	-69.753	0	0	0	0.18078
-2.4908	2.2998	-64.123	-69.775	0	0	0	0.17991
-2.4907	2.2999	-64.174	-69.86	0	0	0	0.17904
-2.4906	2.3	-64.232	-69.781	0	0	0	0.17818
-2.4905	2.3001	-64.217	-69.759	0	0	0	0.17734
-2.4904	2.3002	-64.239	-69.833	0	0	0	0.1765
-2.4903	2.3003	-64.272	-69.808	0	0	0	0.17567
-2.4902	2.3004	-64.202	-69.878	0	0	0	0.17485
-2.4901	2.3005	-64.229	-69.83	0	0	0	0.17404
-2.49	2.3006	-64.132	-69.891	0	0	0	0.17324
-2.4899	2.3007	-64.12	-69.738	0	0	0	0.17245
-2.4898	2.3008	-64.22	-69.741	0	0	0	0.17167
-2.4897	2.3009	-64.199	-69.808	0	0	0	0.1709
-2.4896	2.3009	-64.202	-69.799	0	0	0	0.17014
-2.4895	2.301	-64.287	-69.836	0	0	0	0.16939
-2.4894	2.3011	-64.196	-69.79	0	0	0	0.16865
-2.4893	2.3012	-64.162	-69.814	0	0	0	0.16792
-2.4892	2.3013	-64.116	-69.833	0	0	0	0.16719
-2.4891	2.3014	-64.135	-69.732	0	0	0	0.16648
-2.489	2.3015	-64.254	-69.814	0	0	0	0.16578
-2.4889	2.3016	-64.098	-69.863	0	0	0	0.16508
-2.4888	2.3017	-64.168	-69.836	0	0	0	0.1644
-2.4887	2.3018	-64.232	-69.802	0	0	0	0.16372
-2.4886	2.3019	-64.171	-69.869	0	0	0	0.16306
-2.4885	2.302	-64.309	-69.906	0	0	0	0.1624
-2.4884	2.3021	-64.168	-69.781	0	0	0	0.16175
-2.4883	2.3021	-64.214	-69.796	0	0	0	0.16112
-2.4882	2.3022	-64.177	-69.823	0	0	0	0.16049
-2.4881	2.3023	-64.055	-69.827	0	0	0	0.15987
-2.488	2.3024	-64.217	-69.869	0	0	0	0.15927
-2.4879	2.3025	-64.062	-69.839	0	0	0	0.15867
-2.4878	2.3026	-64.068	-69.854	0	0	0	0.15808
-2.4877	2.3027	-64.132	-69.814	0	0	0	0.1575
-2.4876	2.3028	-63.885	-69.872	0	0	0	0.15693
-2.4875	2.3029	-64.049	-69.894	0	0	0	0.15637
-2.4874	2.303	-64.052	-69.878	0	0	0	0.15582
-2.4873	2.3031	-63.909	-69.958	0	0	0	0.15528
-2.4872	2.3032	-64.065	-69.82	0	0	0	0.15475
-2.4871	2.3032	-64.055	-69.863	0	0	0	0.15423
-2.487	2.3033	-64.01	-69.918	0	0	0	0.15372
-2.4869	2.3034	-64.141	-69.958	0	0	0	0.15322
-2.4868	2.3035	-63.949	-69.848	0	0	0	0.15273
-2.4867	2.3036	-64.08	-69.851	0	0	0	0.15224
-2.4866	2.3037	-63.9	-69.881	0	0	0	0.15177
-2.4865	2.3038	-63.799	-69.857	0	0	0	0.15131
-2.4864	2.3039	-63.933	-69.875	0	0	0	0.15086
-2.4863	2.304	-63.854	-70.004	0	0	0	0.15041
-2.4862	2.3041	-63.714	-69.964	0	0	0	0.14998
-2.4861	2.3042	-63.802	-69.875	0	0	0	0.14955
-2.486	2.3043	-63.735	-69.814	0	0	0	0.14914
-2.4859	2.3044	-63.848	-69.738	0	0	0	0.14873
-2.4858	2.3044	-63.958	-69.747	0	0	0	0.14833
-2.4857	2.3045	-63.75	-69.668	0	0	0	0.14795
-2.4856	2.3046	-63.793	-69.662	0	0	0	0.14757
-2.4855	2.3047	-63.814	-69.628	0	0	0	0.1472
-2.4854	2.3048	-63.845	-69.656	0	0	0	0.14685
-2.4853	2.3049	-63.842	-69.521	0	0	0	0.1465
-2.4852	2.305	-63.711	-69.598	0	0	0	0.14616
-2.4851	2.3051	-63.762	-69.473	0	0	0	0.14583
-2.485	2.3052	-63.619	-69.506	0	0	0	0.14551
-2.4849	2.3053	-63.646	-69.494	0	0	0	0.1452
-2.4848	2.3054	-63.54	-69.451	0	0	0	0.1449
-2.4847	2.3055	-63.482	-69.485	0	0	0	0.1446
-2.4846	2.3056	-63.534	-69.479	0	0	0	0.14432
-2.4845	2.3057	-63.579	-69.427	0	0	0	0.14405
-2.4844	2.3057	-63.411	-69.448	0	0	0	0.14378
-2.4843	2.3058	-63.512	-69.387	0	0	0	0.14353
-2.4842	2.3059	-63.381	-69.521	0	0	0	0.14328
-2.4841	2.306	-63.338	-69.424	0	0	0	0.14305
-2.484	2.3061	-63.402	-69.439	0	0	0	0.14282
-2.4839	2.3062	-63.341	-69.469	0	0	0	0.1426
-2.4838	2.3063	-63.326	-69.387	0	0	0	0.14239
-2.4837	2.3064	-63.372	-69.466	0	0	0	0.1422
-2.4836	2.3065	-63.305	-69.546	0	0	0	0.14201
-2.4835	2.3066	-63.289	-69.524	0	0	0	0.14182
-2.4834	2.3067	-63.308	-69.442	0	0	0	0.14165
-2.4833	2.3068	-63.347	-69.527	0	0	0	0.14149
-2.4832	2.3069	-63.357	-69.454	0	0	0	0.14134
-2.4831	2.3069	-63.271	-69.442	0	0	0	0.14119
-2.483	2.307	-63.405	-69.354	0	0	0	0.14106
-2.4829	2.3071	-63.454	-69.451	0	0	0	0.14093
-2.4828	2.3072	-63.369	-69.534	0	0	0	0.14081
-2.4827	2.3073	-63.363	-69.592	0	0	0	0.14071
-2.4826	2.3074	-63.39	-69.454	0	0	0	0.14061
-2.4825	2.3075	-63.473	-69.555	0	0	0	0.14052
-2.4824	2.3076	-63.543	-69.488	0	0	0	0.14043
-2.4823	2.3077	-63.454	-69.369	0	0	0	0.14036
-2.4822	2.3078	-63.476	-69.491	0	0	0	0.1403
-2.4822	2.3079	-63.491	-69.491	0	0	0	0.14024
-2.4821	2.308	-63.448	-69.497	0	0	0	0.1402
-2.482	2.3081	-63.506	-69.451	0	0	0	0.14016
-2.4819	2.3081	-63.46	-69.381	0	0	0	0.14013
-2.4818	2.3082	-63.378	-69.607	0	0	0	0.14011
-2.4817	2.3083	-63.576	-69.415	0	0	0	0.1401
-2.4816	2.3084	-63.497	-69.604	0	0	0	0.1401
-2.4815	2.3085	-63.604	-69.619	0	0	0	0.1401
-2.4814	2.3086	-63.64	-69.515	0	0	0	0.14012
-2.4813	2.3087	-63.689	-69.598	0	0	0	0.14014
-2.4812	2.3088	-63.524	-69.527	0	0	0	0.14017
-2.4811	2.3089	-63.488	-69.592	0	0	0	0.14021
-2.481	2.309	-63.488	-69.653	0	0	0	0.14026
-2.4809	2.3091	-63.643	-69.534	0	0	0	0.14032
-2.4808	2.3092	-63.704	-69.585	0	0	0	0.14038
-2.4807	2.3093	-63.686	-69.476	0	0	0	0.14046
-2.4806	2.3094	-63.726	-69.497	0	0	0	0.14054
-2.4805	2.3094	-63.564	-69.558	0	0	0	0.14063
-2.4804	2.3095	-63.808	-69.582	0	0	0	0.14073
-2.4803	2.3096	-63.701	-69.521	0	0	0	0.14084
-2.4802	2.3097	-63.695	-69.527	0	0	0	0.14095
-2.4801	2.3098	-63.738	-69.546	0	0	0	0.14107
-2.48	2.3099	-63.613	-69.463	0	0	0	0.14452
-2.4799	2.31	-63.766	-69.683	0	0	0	0.14471
-2.4798	2.3101	-63.747	-69.665	0	0	0	0.14491
-2.4797	2.3102	-63.634	-69.613	0	0	0	0.14511
-2.4796	2.3103	-63.747	-69.595	0	0	0	0.14533
-2.4795	2.3104	-63.665	-69.677	0	0	0	0.14555
-2.4794	2.3105	-63.592	-69.634	0	0	0	0.14578
-2.4793	2.3106	-63.619	-69.524	0	0	0	0.14603
-2.4792	2.3107	-63.515	-69.521	0	0	0	0.14627
-2.4791	2.3107	-63.537	-69.613	0	0	0	0.14653
-2.479	2.3108	-63.585	-69.592	0	0	0	0.1468
-2.4789	2.3109	-63.558	-69.607	0	0	0	0.14707
-2.4788	2.311	-63.607	-69.634	0	0	0	0.14736
-2.4787	2.3111	-63.653	-69.61	0	0	0	0.14765
-2.4786	2.3112	-63.576	-69.643	0	0	0	0.14795
-2.4785	2.3113	-63.714	-69.589	0	0	0	0.14826
-2.4784	2.3114	-63.601	-69.607	0	0	0	0.14857
-2.4783	2.3115	-63.695	-69.573	0	0	0	0.1489
-2.4782	2.3116	-63.68	-69.689	0	0	0	0.14923
-2.4781	2.3117	-63.631	-69.646	0	0	0	0.14957
-2.478	2.3118	-63.857	-69.744	0	0	0	0.14992
-2.4779	2.3119	-63.762	-69.781	0	0	0	0.15027
-2.4778	2.312	-63.695	-69.766	0	0	0	0.15064
-2.4777	2.312	-63.939	-69.662	0	0	0	0.15101
-2.4776	2.3121	-63.863	-69.723	0	0	0	0.15139
-2.4775	2.3122	-63.949	-69.704	0	0	0	0.15178
-2.4774	2.3123	-63.784	-69.711	0	0	0	0.15218
-2.4773	2.3124	-63.842	-69.808	0	0	0	0.15258
-2.4772	2.3125	-63.97	-69.665	0	0	0	0.15299
-2.4771	2.3126	-63.988	-69.692	0	0	0	0.15341
-2.477	2.3127	-64.086	-69.68	0	0	0	0.15384
-2.4769	2.3128	-64.123	-69.738	0	0	0	0.15428
-2.4768	2.3129	-63.967	-69.607	0	0	0	0.15472
-2.4767	2.313	-64.318	-69.656	0	0	0	0.15517
-2.4766	2.3131	-64.208	-69.762	0	0	0	0.15563
-2.4765	2.3132	-64.104	-69.744	0	0	0	0.15609
-2.4764	2.3133	-64.437	-69.656	0	0	0	0.15657
-2.4763	2.3133	-64.284	-69.75	0	0	0	0.15705
-2.4762	2.3134	-64.269	-69.769	0	0	0	0.15754
-2.4761	2.3135	-64.373	-69.756	0	0	0	0.15803
-2.476	2.3136	-64.367	-69.769	0	0	0	0.15853
-2.4759	2.3137	-64.437	-69.823	0	0	0	0.15904
-2.4758	2.3138	-64.58	-69.762	0	0	0	0.15956
-2.4757	2.3139	-64.519	-69.793	0	0	0	0.16009
-2.4756	2.314	-64.678	-69.83	0	0	0	0.16062
-2.4755	2.3141	-64.623	-69.833	0	0	0	0.16116
-2.4754	2.3142	-64.699	-69.799	0	0	0	0.1617
-2.4753	2.3143	-64.757	-69.836	0	0	0	0.16225
-2.4752	2.3144	-64.589	-69.668	0	0	0	0.16281
-2.4751	2.3145	-64.8	-69.704	0	0	0	0.16338
-2.475	2.3146	-64.602	-69.72	0	0	0	0.16395
-2.4749	2.3147	-64.77	-69.747	0	0	0	0.16454
-2.4748	2.3147	-64.69	-69.836	0	0	0	0.16512
-2.4747	2.3148	-64.696	-69.854	0	0	0	0.16572
-2.4746	2.3149	-64.791	-69.689	0	0	0	0.16632
-2.4745	2.315	-64.754	-69.711	0	0	0	0.16692
-2.4744	2.3151	-64.773	-69.762	0	0	0	0.16754
-2.4743	2.3152	-64.876	-69.778	0	0	0	0.16816
-2.4742	2.3153	-64.699	-69.695	0	0	0	0.16879
-2.4741	2.3154	-64.669	-69.75	0	0	0	0.16942
-2.474	2.3155	-64.797	-69.714	0	0	0	0.17006
-2.4739	2.3156	-64.733	-69.714	0	0	0	0.17071
-2.4738	2.3157	-64.846	-69.698	0	0	0	0.17136
-2.4737	2.3158	-64.766	-69.698	0	0	0	0.17202
-2.4736	2.3159	-64.684	-69.622	0	0	0	0.17269
-2.4735	2.316	-64.77	-69.589	0	0	0	0.17336
-2.4734	2.316	-64.812	-69.704	0	0	0	0.17404
-2.4733	2.3161	-64.736	-69.57	0	0	0	0.17472
-2.4732	2.3162	-64.858	-69.631	0	0	0	0.17541
-2.4731	2.3163	-64.617	-69.628	0	0	0	0.17611
-2.473	2.3164	-64.818	-69.637	0	0	0	0.17681
-2.4729	2.3165	-64.794	-69.616	0	0	0	0.17752
-2.4728	2.3166	-64.763	-69.592	0	0	0	0.17823
-2.4727	2.3167	-64.763	-69.738	0	0	0	0.17895
-2.4726	2.3168	-64.617	-69.506	0	0	0	0.17968
-2.4725	2.3169	-64.708	-69.576	0	0	0	0.18041
-2.4724	2.317	-64.812	-69.604	0	0	0	0.18115
-2.4723	2.3171	-64.602	-69.607	0	0	0	0.18189
-2.4722	2.3172	-64.748	-69.714	0	0	0	0.18264
-2.4721	2.3173	-64.632	-69.686	0	0	0	0.18339
-2.472	2.3174	-64.51	-69.729	0	0	0	0.18415
-2.4719	2.3174	-64.547	-69.68	0	0	0	0.18492
-2.4718	2.3175	-64.486	-69.628	0	0	0	0.18569
-2.4717	2.3176	-64.547	-69.64	0	0	0	0.18646
-2.4716	2.3177	-64.364	-69.686	0	0	0	0.18724
-2.4715	2.3178	-64.339	-69.744	0	0	0	0.18803
-2.4714	2.3179	-64.351	-69.759	0	0	0	0.18882
-2.4713	2.318	-64.248	-69.692	0	0	0	0.18962
-2.4712	2.3181	-64.196	-69.674	0	0	0	0.19042
-2.4711	2.3182	-64.312	-69.708	0	0	0	0.19123
-2.471	2.3183	-64.248	-69.833	0	0	0	0.19204
-2.4709	2.3184	-64.315	-69.695	0	0	0	0.19286
-2.4708	2.3185	-64.269	-69.772	0	0	0	0.19368
-2.4707	2.3186	-64.284	-69.814	0	0	0	0.19451
-2.4706	2.3187	-64.4	-69.778	0	0	0	0.19534
-2.4705	2.3188	-64.211	-69.686	0	0	0	0.19618
-2.4704	2.3189	-64.339	-69.747	0	0	0	0.19702
-2.4703	2.3189	-64.354	-69.799	0	0	0	0.19786
-2.4702	2.319	-64.324	-69.75	0	0	0	0.19871
-2.4701	2.3191	-64.489	-69.787	0	0	0	0.19957
-2.47	2.3192	-64.409	-69.802	0	0	0	0.20043
-2.4699	2.3193	-64.339	-69.805	0	0	0	0.20129
-2.4698	2.3194	-64.345	-69.674	0	0	0	0.20216
-2.4697	2.3195	-64.333	-69.912	0	0	0	0.20303
-2.4696	2.3196	-64.394	-69.823	0	0	0	0.20391
-2.4695	2.3197	-64.406	-69.793	0	0	0	0.20479
-2.4694	2.3198	-64.251	-69.897	0	0	0	0.20568
-2.4693	2.3199	-64.44	-69.848	0	0	0	0.20657
-2.4692	2.32	-64.205	-69.814	0	0	0	0.20746
-2.4691	2.3201	-64.33	-69.83	0	0	0	0.20836
-2.469	2.3202	-64.559	-69.772	0	0	0	0.20926
-2.4689	2.3203	-64.361	-69.744	0	0	0	0.21017
-2.4688	2.3203	-64.333	-69.897	0	0	0	0.21108
-2.4687	2.3204	-64.4	-69.793	0	0	0	0.21199
-2.4686	2.3205	-64.394	-69.93	0	0	0	0.21291
-2.4685	2.3206	-64.44	-69.744	0	0	0	0.21383
-2.4684	2.3207	-64.394	-69.924	0	0	0	0.21476
-2.4683	2.3208	-64.464	-69.823	0	0	0	0.21568
-2.4682	2.3209	-64.422	-69.732	0	0	0	0.21662
-2.4681	2.321	-64.483	-69.839	0	0	0	0.21755
-2.468	2.3211	-64.391	-69.83	0	0	0	0.21849
-2.4679	2.3212	-64.312	-69.82	0	0	0	0.21943
-2.4678	2.3213	-64.385	-69.756	0	0	0	0.22038
-2.4677	2.3214	-64.403	-69.836	0	0	0	0.22133
-2.4676	2.3215	-64.351	-69.659	0	0	0	0.22228
-2.4675	2.3216	-64.422	-69.799	0	0	0	0.22324
-2.4674	2.3217	-64.452	-69.802	0	0	0	0.2242
-2.4673	2.3218	-64.385	-69.784	0	0	0	0.22516
-2.4672	2.3218	-64.507	-69.793	0	0	0	0.22612
-2.4671	2.3219	-64.48	-69.674	0	0	0	0.22709
-2.467	2.322	-64.373	-69.732	0	0	0	0.22806
-2.4669	2.3221	-64.535	-69.656	0	0	0	0.22904
-2.4668	2.3222	-64.425	-69.759	0	0	0	0.23001
-2.4667	2.3223	-64.416	-69.784	0	0	0	0.23099
-2.4666	2.3224	-64.531	-69.802	0	0	0	0.23198
-2.4665	2.3225	-64.495	-69.766	0	0	0	0.23296
-2.4664	2.3226	-64.513	-69.756	0	0	0	0.23395
-2.4663	2.3227	-64.425	-69.549	0	0	0	0.23494
-2.4662	2.3228	-64.495	-69.778	0	0	0	0.23593
-2.4661	2.3229	-64.403	-69.769	0	0	0	0.23693
-2.466	2.323	-64.373	-69.714	0	0	0	0.23793
-2.4659	2.3231	-64.498	-69.72	0	0	0	0.23893
-2.4658	2.3232	-64.474	-69.72	0	0	0	0.23993
-2.4657	2.3233	-64.544	-69.726	0	0	0	0.24093
-2.4656	2.3233	-64.574	-69.72	0	0	0	0.24194
-2.4655	2.3234	-64.58	-69.604	0	0	0	0.24295
-2.4654	2.3235	-64.553	-69.796	0	0	0	0.24396
-2.4653	2.3236	-64.574	-69.701	0	0	0	0.24497
-2.4652	2.3237	-64.556	-69.72	0	0	0	0.24599
-2.4651	2.3238	-64.541	-69.662	0	0	0	0.24701
-2.465	2.3239	-64.461	-69.683	0	0	0	0.24803
-2.4649	2.324	-64.577	-69.585	0	0	0	0.24905
-2.4648	2.3241	-64.66	-69.723	0	0	0	0.24678
-2.4647	2.3242	-64.672	-69.741	0	0	0	0.24786
-2.4646	2.3243	-64.571	-69.717	0	0	0	0.24893
-2.4645	2.3244	-64.535	-69.72	0	0	0	0.25001
-2.4644	2.3245	-64.544	-69.686	0	0	0	0.25108
-2.4643	2.3246	-64.626	-69.756	0	0	0	0.25216
-2.4642	2.3247	-64.519	-69.692	0	0	0	0.25324
-2.4641	2.3248	-64.589	-69.662	0	0	0	0.25432
-2.464	2.3248	-64.525	-69.653	0	0	0	0.2554
-2.4639	2.3249	-64.541	-69.686	0	0	0	0.25648
-2.4638	2.325	-64.586	-69.827	0	0	0	0.25427
-2.4637	2.3251	-64.531	-69.747	0	0	0	0.2554
-2.4636	2.3252	-64.477	-69.708	0	0	0	0.25653
-2.4635	2.3253	-64.461	-69.735	0	0	0	0.25766
-2.4634	2.3254	-64.535	-69.802	0	0	0	0.25879
-2.4633	2.3255	-64.519	-69.72	0	0	0	0.25992
-2.4632	2.3256	-64.428	-69.75	0	0	0	0.26105
-2.4631	2.3257	-64.565	-69.811	0	0	0	0.26218
-2.463	2.3258	-64.562	-69.756	0	0	0	0.26331
-2.4629	2.3259	-64.47	-69.781	0	0	0	0.26444
-2.4628	2.326	-64.397	-69.808	0	0	0	0.26557
-2.4627	2.3261	-64.358	-69.772	0	0	0	0.2667
-2.4626	2.3262	-64.47	-69.802	0	0	0	0.26783
-2.4625	2.3263	-64.358	-69.86	0	0	0	0.26895
-2.4624	2.3264	-64.29	-69.778	0	0	0	0.27008
-2.4623	2.3264	-64.361	-69.79	0	0	0	0.27121
-2.4622	2.3265	-64.336	-69.741	0	0	0	0.27233
-2.4621	2.3266	-64.229	-69.83	0	0	0	0.27346
-2.462	2.3267	-64.403	-69.805	0	0	0	0.27458
-2.4619	2.3268	-64.235	-69.82	0	0	0	0.27571
-2.4618	2.3269	-64.287	-69.802	0	0	0	0.27683
-2.4617	2.327	-64.351	-69.872	0	0	0	0.27795
-2.4616	2.3271	-64.235	-69.888	0	0	0	0.27907
-2.4615	2.3272	-64.327	-69.854	0	0	0	0.28019
-2.4614	2.3273	-64.275	-69.939	0	0	0	0.28131
-2.4613	2.3274	-64.269	-69.933	0	0	0	0.28243
-2.4612	2.3275	-64.275	-69.842	0	0	0	0.28355
-2.4611	2.3276	-64.229	-70.01	0	0	0	0.28467
-2.461	2.3277	-64.303	-69.909	0	0	0	0.28578
-2.4609	2.3278	-64.327	-69.909	0	0	0	0.2869
-2.4608	2.3279	-64.223	-69.915	0	0	0	0.28801
-2.4607	2.328	-64.293	-69.827	0	0	0	0.28912
-2.4606	2.328	-64.272	-69.976	0	0	0	0.29023
-2.4605	2.3281	-64.245	-69.866	0	0	0	0.29134
-2.4604	2.3282	-64.33	-69.897	0	0	0	0.29245
-2.4603	2.3283	-64.208	-69.909	0	0	0	0.29356
-2.4602	2.3284	-64.29	-69.869	0	0	0	0.29467
-2.4601	2.3285	-64.324	-69.784	0	0	0	0.29577
-2.46	2.3286	-64.223	-69.827	0	0	0	0.29687
-2.4599	2.3287	-64.306	-69.906	0	0	0	0.29798
-2.4598	2.3288	-64.202	-69.939	0	0	0	0.29908
-2.4597	2.3289	-64.245	-69.885	0	0	0	0.30017
-2.4596	2.329	-64.153	-69.949	0	0	0	0.30127
-2.4595	2.3291	-64.104	-69.949	0	0	0	0.30237
-2.4594	2.3292	-64.257	-69.964	0	0	0	0.30346
-2.4593	2.3293	-64.153	-69.866	0	0	0	0.30455
-2.4592	2.3294	-64.19	-69.872	0	0	0	0.30564
-2.4591	2.3295	-64.11	-70.031	0	0	0	0.30673
-2.459	2.3296	-63.964	-69.946	0	0	0	0.30782
-2.4589	2.3297	-64.028	-69.949	0	0	0	0.30891
-2.4588	2.3297	-63.857	-69.949	0	0	0	0.30999
-2.4587	2.3298	-63.747	-70.037	0	0	0	0.31107
-2.4586	2.3299	-63.976	-70.025	0	0	0	0.31215
-2.4585	2.33	-63.753	-69.961	0	0	0	0.31323
-2.4584	2.3301	-63.643	-69.964	0	0	0	0.3143
-2.4583	2.3302	-63.75	-69.894	0	0	0	0.31538
-2.4582	2.3303	-63.622	-69.878	0	0	0	0.31645
-2.4581	2.3304	-63.778	-69.836	0	0	0	0.31752
-2.458	2.3305	-63.653	-69.723	0	0	0	0.31859
-2.4579	2.3306	-63.735	-69.964	0	0	0	0.31965
-2.4578	2.3307	-63.814	-69.885	0	0	0	0.32071
-2.4577	2.3308	-63.711	-69.796	0	0	0	0.32177
-2.4576	2.3309	-63.784	-69.695	0	0	0	0.32283
-2.4575	2.331	-63.86	-69.833	0	0	0	0.32389
-2.4574	2.3311	-63.811	-69.741	0	0	0	0.32494
-2.4573	2.3312	-63.744	-69.756	0	0	0	0.32599
-2.4572	2.3313	-63.683	-69.689	0	0	0	0.32704
-2.4571	2.3314	-63.756	-69.756	0	0	0	0.32809
-2.457	2.3314	-63.711	-69.698	0	0	0	0.32913
-2.4569	2.3315	-63.595	-69.692	0	0	0	0.33017
-2.4568	2.3316	-63.567	-69.671	0	0	0	0.33121
-2.4567	2.3317	-63.506	-69.802	0	0	0	0.33225
-2.4566	2.3318	-63.573	-69.604	0	0	0	0.33328
-2.4565	2.3319	-63.543	-69.515	0	0	0	0.33432
-2.4564	2.332	-63.457	-69.521	0	0	0	0.33534
-2.4563	2.3321	-63.454	-69.64	0	0	0	0.33637
-2.4562	2.3322	-63.543	-69.717	0	0	0	0.33739
-2.4561	2.3323	-63.463	-69.769	0	0	0	0.33841
-2.456	2.3324	-63.488	-69.677	0	0	0	0.33943
-2.4559	2.3325	-63.479	-69.576	0	0	0	0.34044
-2.4558	2.3326	-63.445	-69.653	0	0	0	0.34146
-2.4557	2.3327	-63.585	-69.708	0	0	0	0.34247
-2.4556	2.3328	-63.479	-69.625	0	0	0	0.34347
-2.4555	2.3329	-63.573	-69.653	0	0	0	0.34447
-2.4554	2.333	-63.616	-69.625	0	0	0	0.34547
-2.4553	2.3331	-63.558	-69.714	0	0	0	0.34647
-2.4552	2.3331	-63.561	-69.671	0	0	0	0.34747
-2.4551	2.3332	-63.698	-69.576	0	0	0	0.34846
-2.455	2.3333	-63.729	-69.714	0	0	0	0.34944
-2.4549	2.3334	-63.796	-69.72	0	0	0	0.35043
-2.4548	2.3335	-63.704	-69.686	0	0	0	0.35141
-2.4548	2.3336	-63.805	-69.708	0	0	0	0.35239
-2.4547	2.3337	-63.827	-69.723	0	0	0	0.35336
-2.4546	2.3338	-63.65	-69.738	0	0	0	0.35433
-2.4545	2.3339	-63.888	-69.698	0	0	0	0.3553
-2.4544	2.334	-63.897	-69.695	0	0	0	0.35627
-2.4543	2.3341	-63.845	-69.567	0	0	0	0.35723
-2.4542	2.3342	-64.068	-69.738	0	0	0	0.35819
-2.4541	2.3343	-63.933	-69.524	0	0	0	0.35914
-2.454	2.3344	-64.089	-69.579	0	0	0	0.3601
-2.4539	2.3345	-64.058	-69.637	0	0	0	0.36104
-2.4538	2.3346	-64.092	-69.607	0	0	0	0.36199
-2.4537	2.3347	-64.226	-69.57	0	0	0	0.36293
-2.4536	2.3348	-64.113	-69.646	0	0	0	0.36387
-2.4535	2.3349	-64.147	-69.619	0	0	0	0.3648
-2.4534	2.3349	-64.223	-69.659	0	0	0	0.36573
-2.4533	2.335	-64.168	-69.64	0	0	0	0.36666
-2.4532	2.3351	-64.208	-69.643	0	0	0	0.36758
-2.4531	2.3352	-64.208	-69.668	0	0	0	0.3685
-2.453	2.3353	-64.174	-69.68	0	0	0	0.36942
-2.4529	2.3354	-64.235	-69.573	0	0	0	0.37033
-2.4528	2.3355	-64.263	-69.686	0	0	0	0.37124
-2.4527	2.3356	-64.162	-69.579	0	0	0	0.37214
-2.4526	2.3357	-64.364	-69.558	0	0	0	0.37304
-2.4525	2.3358	-64.382	-69.65	0	0	0	0.37394
-2.4524	2.3359	-64.3	-69.582	0	0	0	0.37483
-2.4523	2.336	-64.26	-69.601	0	0	0	0.37572
-2.4522	2.3361	-64.254	-69.579	0	0	0	0.37661
-2.4521	2.3362	-64.385	-69.622	0	0	0	0.37749
-2.452	2.3363	-64.281	-69.723	0	0	0	0.37837
-2.4519	2.3364	-64.376	-69.695	0	0	0	0.37924
-2.4518	2.3365	-64.416	-69.704	0	0	0	0.38011
-2.4517	2.3366	-64.385	-69.75	0	0	0	0.38097
-2.4516	2.3367	-64.425	-69.567	0	0	0	0.38184
-2.4515	2.3368	-64.449	-69.607	0	0	0	0.38269
-2.4514	2.3368	-64.336	-69.631	0	0	0	0.38355
-2.4513	2.3369	-64.239	-69.65	0	0	0	0.3844
-2.4512	2.337	-64.165	-69.631	0	0	0	0.38524
-2.4511	2.3371	-64.184	-69.708	0	0	0	0.38608
-2.451	2.3372	-64.193	-69.781	0	0	0	0.38692
-2.4509	2.3373	-63.979	-69.68	0	0	0	0.38775
-2.4508	2.3374	-64.138	-69.695	0	0	0	0.38858
-2.4507	2.3375	-64.043	-69.61	0	0	0	0.3894
-2.4506	2.3376	-64.074	-69.665	0	0	0	0.39022
-2.4505	2.3377	-64.04	-69.762	0	0	0	0.39104
-2.4504	2.3378	-63.991	-69.656	0	0	0	0.39185
-2.4503	2.3379	-64.116	-69.665	0	0	0	0.39266
-2.4502	2.338	-64.184	-69.717	0	0	0	0.39346
-2.4501	2.3381	-64.055	-69.643	0	0	0	0.39426
-2.45	2.3382	-64.153	-69.747	0	0	0	0.39505
-2.4499	2.3383	-64.159	-69.631	0	0	0	0.39584
-2.4498	2.3384	-64.098	-69.543	0	0	0	0.39663
-2.4497	2.3385	-64.092	-69.659	0	0	0	0.39741
-2.4496	2.3386	-64.116	-69.695	0	0	0	0.39819
-2.4495	2.3387	-64.199	-69.747	0	0	0	0.39896
-2.4494	2.3387	-64.202	-69.653	0	0	0	0.39973
-2.4493	2.3388	-64.098	-69.634	0	0	0	0.40049
-2.4492	2.3389	-64.141	-69.708	0	0	0	0.40125
-2.4491	2.339	-64.037	-69.598	0	0	0	0.402
-2.449	2.3391	-64.074	-69.732	0	0	0	0.40275
-2.4489	2.3392	-64.098	-69.549	0	0	0	0.4035
-2.4488	2.3393	-63.924	-69.509	0	0	0	0.40424
-2.4487	2.3394	-63.949	-69.576	0	0	0	0.40497
-2.4486	2.3395	-64.101	-69.534	0	0	0	0.4057
-2.4485	2.3396	-64.037	-69.537	0	0	0	0.40643
-2.4484	2.3397	-63.955	-69.607	0	0	0	0.40715
-2.4483	2.3398	-63.946	-69.537	0	0	0	0.40787
-2.4482	2.3399	-63.909	-69.589	0	0	0	0.40858
-2.4481	2.34	-63.894	-69.631	0	0	0	0.40929
-2.448	2.3401	-63.842	-69.65	0	0	0	0.40999
-2.4479	2.3402	-63.75	-69.509	0	0	0	0.41069
-2.4478	2.3403	-63.772	-69.537	0	0	0	0.41139
-2.4477	2.3404	-63.808	-69.607	0	0	0	0.41208
-2.4476	2.3405	-63.833	-69.622	0	0	0	0.41276
-2.4475	2.3406	-63.885	-69.646	0	0	0	0.41344
-2.4474	2.3407	-63.869	-69.665	0	0	0	0.41411
-2.4473	2.3407	-63.918	-69.613	0	0	0	0.41478
-2.4472	2.3408	-63.924	-69.634	0	0	0	0.41545
-2.4471	2.3409	-63.885	-69.61	0	0	0	0.41611
-2.447	2.341	-63.878	-69.65	0	0	0	0.41677
-2.4469	2.3411	-63.955	-69.643	0	0	0	0.41742
-2.4468	2.3412	-63.967	-69.595	0	0	0	0.41806
-2.4467	2.3413	-63.891	-69.598	0	0	0	0.4187
-2.4466	2.3414	-64.022	-69.662	0	0	0	0.41934
-2.4465	2.3415	-64.037	-69.625	0	0	0	0.41997
-2.4464	2.3416	-63.93	-69.622	0	0	0	0.4206
-2.4463	2.3417	-63.979	-69.646	0	0	0	0.42122
-2.4462	2.3418	-63.967	-69.677	0	0	0	0.42184
-2.4461	2.3419	-63.86	-69.695	0	0	0	0.42245
-2.446	2.342	-63.924	-69.607	0	0	0	0.42306
-2.4459	2.3421	-63.738	-69.555	0	0	0	0.42366
-2.4458	2.3422	-63.848	-69.695	0	0	0	0.42425
-2.4457	2.3423	-63.799	-69.604	0	0	0	0.42485
-2.4456	2.3424	-63.814	-69.653	0	0	0	0.42543
-2.4455	2.3425	-63.796	-69.692	0	0	0	0.42602
-2.4454	2.3426	-63.839	-69.674	0	0	0	0.42659
-2.4453	2.3427	-63.799	-69.625	0	0	0	0.42716
-2.4452	2.3427	-63.83	-69.582	0	0	0	0.42773
-2.4451	2.3428	-63.921	-69.686	0	0	0	0.42829
-2.445	2.3429	-63.802	-69.579	0	0	0	0.42885
-2.4449	2.343	-63.845	-69.662	0	0	0	0.4294
-2.4448	2.3431	-63.851	-69.68	0	0	0	0.42995
-2.4447	2.3432	-63.891	-69.747	0	0	0	0.43049
-2.4446	2.3433	-63.909	-69.558	0	0	0	0.43103
-2.4445	2.3434	-63.766	-69.631	0	0	0	0.43156
-2.4444	2.3435	-63.863	-69.595	0	0	0	0.43209
-2.4443	2.3436	-63.827	-69.738	0	0	0	0.43261
-2.4442	2.3437	-63.836	-69.698	0	0	0	0.43644
-2.4441	2.3438	-63.86	-69.671	0	0	0	0.437
-2.444	2.3439	-63.799	-69.704	0	0	0	0.43756
-2.4439	2.344	-63.747	-69.704	0	0	0	0.43811
-2.4438	2.3441	-63.833	-69.787	0	0	0	0.43866
-2.4437	2.3442	-63.744	-69.717	0	0	0	0.4392
-2.4436	2.3443	-63.823	-69.808	0	0	0	0.43974
-2.4435	2.3444	-63.744	-69.775	0	0	0	0.44027
-2.4434	2.3445	-63.854	-69.808	0	0	0	0.4408
-2.4433	2.3446	-63.964	-69.799	0	0	0	0.44133
-2.4432	2.3447	-63.787	-69.753	0	0	0	0.44185
-2.4431	2.3448	-63.881	-69.723	0	0	0	0.44237
-2.443	2.3448	-63.836	-69.827	0	0	0	0.44288
-2.4429	2.3449	-63.881	-69.842	0	0	0	0.44339
-2.4428	2.345	-63.949	-69.668	0	0	0	0.44389
-2.4427	2.3451	-63.781	-69.747	0	0	0	0.44439
-2.4426	2.3452	-63.848	-69.756	0	0	0	0.44489
-2.4425	2.3453	-63.97	-69.845	0	0	0	0.44538
-2.4424	2.3454	-63.83	-69.772	0	0	0	0.44586
-2.4423	2.3455	-64.074	-69.695	0	0	0	0.44634
-2.4422	2.3456	-63.952	-69.708	0	0	0	0.44682
-2.4421	2.3457	-63.878	-69.744	0	0	0	0.44729
-2.442	2.3458	-63.973	-69.82	0	0	0	0.44776
-2.4419	2.3459	-64.04	-69.72	0	0	0	0.44822
-2.4418	2.346	-63.946	-69.799	0	0	0	0.44868
-2.4417	2.3461	-63.946	-69.775	0	0	0	0.44914
-2.4416	2.3462	-64.098	-69.747	0	0	0	0.44959
-2.4415	2.3463	-64.104	-69.82	0	0	0	0.45004
-2.4414	2.3464	-64.055	-69.793	0	0	0	0.45048
-2.4413	2.3465	-64.15	-69.83	0	0	0	0.45091
-2.4412	2.3466	-64.217	-69.762	0	0	0	0.45135
-2.4411	2.3467	-64.068	-69.881	0	0	0	0.45178
-2.441	2.3468	-64.147	-69.762	0	0	0	0.4522
-2.4409	2.3469	-64.153	-69.878	0	0	0	0.45262
-2.4408	2.347	-64.147	-69.717	0	0	0	0.45304
-2.4407	2.3471	-64.336	-69.811	0	0	0	0.45345
-2.4406	2.3471	-64.245	-69.741	0	0	0	0.45386
-2.4405	2.3472	-64.318	-69.869	0	0	0	0.45426
-2.4404	2.3473	-64.33	-69.808	0	0	0	0.45466
-2.4403	2.3474	-64.174	-69.903	0	0	0	0.45505
-2.4402	2.3475	-64.211	-69.72	0	0	0	0.45544
-2.4401	2.3476	-64.348	-69.872	0	0	0	0.45583
-2.44	2.3477	-64.168	-69.796	0	0	0	0.45621
-2.4399	2.3478	-64.306	-69.823	0	0	0	0.45658
-2.4398	2.3479	-64.208	-69.918	0	0	0	0.45696
-2.4397	2.348	-64.19	-69.854	0	0	0	0.45733
-2.4396	2.3481	-64.205	-69.863	0	0	0	0.45769
-2.4395	2.3482	-64.08	-69.781	0	0	0	0.45805
-2.4394	2.3483	-64.168	-69.9	0	0	0	0.45841
-2.4393	2.3484	-64.138	-69.894	0	0	0	0.45876
-2.4392	2.3485	-64.177	-69.796	0	0	0	0.4591
-2.4391	2.3486	-64.29	-69.863	0	0	0	0.46276
-2.439	2.3487	-64.132	-69.839	0	0	0	0.46315
-2.4389	2.3488	-64.147	-69.744	0	0	0	0.46354
-2.4388	2.3489	-64.223	-69.894	0	0	0	0.46392
-2.4387	2.349	-64.174	-69.897	0	0	0	0.4643
-2.4386	2.3491	-64.193	-69.897	0	0	0	0.46467
-2.4385	2.3492	-64.187	-69.888	0	0	0	0.46504
-2.4384	2.3493	-64.199	-69.863	0	0	0	0.46541
-2.4383	2.3494	-64.223	-69.921	0	0	0	0.46578
-2.4382	2.3494	-64.11	-69.823	0	0	0	0.46614
-2.4381	2.3495	-64.272	-69.909	0	0	0	0.4665
-2.438	2.3496	-64.15	-69.808	0	0	0	0.46685
-2.4379	2.3497	-64.22	-69.854	0	0	0	0.4672
-2.4378	2.3498	-64.287	-69.894	0	0	0	0.46755
-2.4377	2.3499	-64.235	-69.848	0	0	0	0.46789
-2.4376	2.35	-64.309	-69.729	0	0	0	0.46823
-2.4375	2.3501	-64.266	-69.93	0	0	0	0.46857
-2.4374	2.3502	-64.077	-69.796	0	0	0	0.46891
-2.4373	2.3503	-64.123	-69.784	0	0	0	0.46924
-2.4372	2.3504	-64.138	-69.787	0	0	0	0.46956
-2.4371	2.3505	-64.116	-69.747	0	0	0	0.46989
-2.437	2.3506	-64.107	-69.823	0	0	0	0.47021
-2.4369	2.3507	-64.077	-69.823	0	0	0	0.47053
-2.4368	2.3508	-64.031	-69.9	0	0	0	0.47084
-2.4367	2.3509	-64.11	-69.823	0	0	0	0.47116
-2.4366	2.351	-63.949	-69.793	0	0	0	0.47147
-2.4365	2.3511	-64.019	-69.823	0	0	0	0.47177
-2.4364	2.3512	-64.007	-69.714	0	0	0	0.47207
-2.4363	2.3513	-64.055	-69.753	0	0	0	0.47237
-2.4362	2.3514	-63.973	-69.802	0	0	0	0.47267
-2.4361	2.3515	-63.964	-69.738	0	0	0	0.47296
-2.436	2.3516	-64	-69.784	0	0	0	0.47326
-2.4359	2.3517	-63.946	-69.766	0	0	0	0.47354
-2.4358	2.3518	-63.891	-69.842	0	0	0	0.47383
-2.4357	2.3518	-63.949	-69.683	0	0	0	0.47411
-2.4356	2.3519	-63.872	-69.729	0	0	0	0.47439
-2.4355	2.352	-63.946	-69.72	0	0	0	0.47467
-2.4354	2.3521	-63.781	-69.726	0	0	0	0.47494
-2.4353	2.3522	-63.866	-69.863	0	0	0	0.47521
-2.4352	2.3523	-63.839	-69.753	0	0	0	0.47548
-2.4351	2.3524	-63.827	-69.723	0	0	0	0.47574
-2.435	2.3525	-63.811	-69.732	0	0	0	0.476
-2.4349	2.3526	-63.772	-69.915	0	0	0	0.47626
-2.4348	2.3527	-63.741	-69.875	0	0	0	0.47652
-2.4347	2.3528	-63.695	-69.897	0	0	0	0.47677
-2.4346	2.3529	-63.68	-69.933	0	0	0	0.47703
-2.4345	2.353	-63.677	-69.817	0	0	0	0.47727
-2.4344	2.3531	-63.595	-69.903	0	0	0	0.47752
-2.4343	2.3532	-63.692	-69.897	0	0	0	0.47776
-2.4342	2.3533	-63.634	-69.869	0	0	0	0.47801
-2.4341	2.3534	-63.677	-69.82	0	0	0	0.47824
-2.434	2.3535	-63.668	-69.799	0	0	0	0.47848
-2.4339	2.3536	-63.677	-69.857	0	0	0	0.47871
-2.4338	2.3537	-63.717	-69.906	0	0	0	0.47894
-2.4337	2.3538	-63.671	-69.9	0	0	0	0.47917
-2.4336	2.3539	-63.762	-69.808	0	0	0	0.4794
-2.4335	2.354	-63.744	-69.741	0	0	0	0.47962
-2.4334	2.3541	-63.778	-69.97	0	0	0	0.47984
-2.4333	2.3542	-63.814	-69.827	0	0	0	0.48006
-2.4332	2.3543	-63.772	-69.967	0	0	0	0.48028
-2.4331	2.3544	-63.799	-69.97	0	0	0	0.48049
-2.433	2.3544	-63.848	-69.921	0	0	0	0.4807
-2.4329	2.3545	-63.906	-69.964	0	0	0	0.48091
-2.4328	2.3546	-63.878	-69.796	0	0	0	0.48112
-2.4327	2.3547	-63.851	-69.946	0	0	0	0.48133
-2.4326	2.3548	-63.933	-69.802	0	0	0	0.48153
-2.4325	2.3549	-63.854	-69.79	0	0	0	0.48173
-2.4324	2.355	-63.875	-69.787	0	0	0	0.48193
-2.4323	2.3551	-63.836	-69.714	0	0	0	0.48212
-2.4322	2.3552	-63.82	-69.65	0	0	0	0.48232
-2.4321	2.3553	-63.881	-69.756	0	0	0	0.48251
-2.432	2.3554	-63.939	-69.579	0	0	0	0.4827
-2.4319	2.3555	-63.808	-69.469	0	0	0	0.48289
-2.4318	2.3556	-63.927	-69.57	0	0	0	0.48308
-2.4317	2.3557	-63.836	-69.482	0	0	0	0.48326
-2.4316	2.3558	-63.943	-69.589	0	0	0	0.48344
-2.4315	2.3559	-63.845	-69.576	0	0	0	0.48362
-2.4314	2.356	-63.881	-69.473	0	0	0	0.4838
-2.4313	2.3561	-63.79	-69.582	0	0	0	0.48398
-2.4312	2.3562	-63.732	-69.576	0	0	0	0.48415
-2.4311	2.3563	-63.814	-69.479	0	0	0	0.48433
-2.431	2.3564	-63.86	-69.405	0	0	0	0.4845
-2.4309	2.3565	-63.808	-69.427	0	0	0	0.48467
-2.4308	2.3566	-63.851	-69.36	0	0	0	0.48484
-2.4307	2.3567	-63.817	-69.241	0	0	0	0.485
-2.4306	2.3568	-63.778	-69.277	0	0	0	0.48517
-2.4305	2.3569	-63.943	-69.204	0	0	0	0.48533
-2.4304	2.357	-63.814	-69.115	0	0	0	0.48549
-2.4303	2.3571	-63.839	-69.054	0	0	0	0.48565
-2.4302	2.3572	-63.878	-68.871	0	0	0	0.48581
-2.4301	2.3572	-63.665	-68.899	0	0	0	0.48597
-2.43	2.3573	-63.775	-68.89	0	0	0	0.48612
-2.4299	2.3574	-63.695	-68.798	0	0	0	0.48628
-2.4298	2.3575	-63.628	-68.926	0	0	0	0.48643
-2.4297	2.3576	-63.65	-68.862	0	0	0	0.48658
-2.4296	2.3577	-63.543	-68.835	0	0	0	0.48673
-2.4295	2.3578	-63.616	-68.688	0	0	0	0.48688
-2.4294	2.3579	-63.598	-68.7	0	0	0	0.48702
-2.4293	2.358	-63.558	-68.795	0	0	0	0.48717
-2.4292	2.3581	-63.601	-68.755	0	0	0	0.48732
-2.4291	2.3582	-63.573	-68.804	0	0	0	0.48746
-2.429	2.3583	-63.567	-68.752	0	0	0	0.4876
-2.4289	2.3584	-63.744	-68.777	0	0	0	0.48774
-2.4288	2.3585	-63.506	-68.914	0	0	0	0.48788
-2.4287	2.3586	-63.717	-68.923	0	0	0	0.48802
-2.4286	2.3587	-63.531	-68.847	0	0	0	0.48816
-2.4285	2.3588	-63.656	-68.871	0	0	0	0.48829
-2.4284	2.3589	-63.643	-68.871	0	0	0	0.48843
-2.4283	2.359	-63.558	-68.832	0	0	0	0.48856
-2.4282	2.3591	-63.759	-68.761	0	0	0	0.4887
-2.4281	2.3592	-63.778	-68.844	0	0	0	0.48883
-2.428	2.3593	-63.72	-68.783	0	0	0	0.48896
-2.4279	2.3594	-63.827	-68.908	0	0	0	0.48909
-2.4278	2.3595	-63.784	-68.942	0	0	0	0.48922
-2.4277	2.3596	-63.857	-68.841	0	0	0	0.48935
-2.4276	2.3597	-63.875	-68.926	0	0	0	0.48948
-2.4275	2.3598	-63.802	-68.917	0	0	0	0.48961
-2.4274	2.3599	-63.946	-68.823	0	0	0	0.48974
-2.4274	2.36	-63.949	-68.963	0	0	0	0.48986
-2.4273	2.3601	-63.973	-69.018	0	0	0	0.48999
-2.4272	2.3601	-63.973	-68.966	0	0	0	0.49011
-2.4271	2.3602	-63.833	-69.128	0	0	0	0.49024
-2.427	2.3603	-63.933	-68.966	0	0	0	0.49036
-2.4269	2.3604	-64.016	-68.966	0	0	0	0.49048
-2.4268	2.3605	-63.842	-69.015	0	0	0	0.49061
-2.4267	2.3606	-63.918	-69.076	0	0	0	0.49073
-2.4266	2.3607	-63.9	-69.051	0	0	0	0.49085
-2.4265	2.3608	-63.949	-69.109	0	0	0	0.49097
-2.4264	2.3609	-64.089	-69.027	0	0	0	0.49109
-2.4263	2.361	-63.897	-69.009	0	0	0	0.49121
-2.4262	2.3611	-64.028	-69.082	0	0	0	0.49133
-2.4261	2.3612	-64.022	-69.061	0	0	0	0.49145
-2.426	2.3613	-63.924	-69.033	0	0	0	0.49157
-2.4259	2.3614	-64.049	-68.957	0	0	0	0.49169
-2.4258	2.3615	-64.034	-69.018	0	0	0	0.49181
-2.4257	2.3616	-64.116	-68.938	0	0	0	0.49193
-2.4256	2.3617	-64.232	-69.134	0	0	0	0.49205
-2.4255	2.3618	-64.022	-69.158	0	0	0	0.49217
-2.4254	2.3619	-64.199	-69.097	0	0	0	0.49229
-2.4253	2.362	-64.144	-69.137	0	0	0	0.49241
-2.4252	2.3621	-64.031	-69.167	0	0	0	0.49253
-2.4251	2.3622	-64.266	-69.106	0	0	0	0.49265
-2.425	2.3623	-64.065	-68.978	0	0	0	0.49277
-2.4249	2.3624	-64.162	-69.021	0	0	0	0.49289
-2.4248	2.3625	-64.315	-69	0	0	0	0.493
-2.4247	2.3626	-64.135	-68.954	0	0	0	0.49312
-2.4246	2.3627	-64.312	-69.024	0	0	0	0.49324
-2.4245	2.3628	-64.211	-68.957	0	0	0	0.49336
-2.4244	2.3629	-64.15	-68.963	0	0	0	0.49348
-2.4243	2.363	-64.303	-68.877	0	0	0	0.4936
-2.4242	2.3631	-64.242	-68.893	0	0	0	0.49372
-2.4241	2.3632	-64.168	-68.935	0	0	0	0.49385
-2.424	2.3633	-64.306	-68.966	0	0	0	0.49397
-2.4239	2.3633	-64.22	-68.905	0	0	0	0.49409
-2.4238	2.3634	-64.379	-68.963	0	0	0	0.49421
-2.4237	2.3635	-64.272	-69.027	0	0	0	0.49433
-2.4236	2.3636	-64.199	-68.951	0	0	0	0.49446
-2.4235	2.3637	-64.281	-69.054	0	0	0	0.49458
-2.4234	2.3638	-64.19	-68.996	0	0	0	0.4947
-2.4233	2.3639	-64.214	-68.868	0	0	0	0.49483
-2.4232	2.364	-64.278	-68.911	0	0	0	0.49495
-2.4231	2.3641	-64.129	-68.908	0	0	0	0.49508
-2.423	2.3642	-64.26	-68.847	0	0	0	0.49521
-2.4229	2.3643	-64.153	-68.911	0	0	0	0.49534
-2.4228	2.3644	-63.878	-68.896	0	0	0	0.49546
-2.4227	2.3645	-63.885	-69.048	0	0	0	0.49559
-2.4226	2.3646	-63.616	-68.923	0	0	0	0.49572
-2.4225	2.3647	-63.775	-69.091	0	0	0	0.49585
-2.4224	2.3648	-63.793	-69.061	0	0	0	0.49599
-2.4223	2.3649	-63.558	-69.009	0	0	0	0.49612
-2.4222	2.365	-63.72	-69.021	0	0	0	0.49625
-2.4221	2.3651	-63.564	-69.006	0	0	0	0.49639
-2.422	2.3652	-63.579	-69.091	0	0	0	0.49652
-2.4219	2.3653	-63.68	-69.085	0	0	0	0.49666
-2.4218	2.3654	-63.689	-69.115	0	0	0	0.4968
-2.4217	2.3655	-63.802	-69.152	0	0	0	0.49694
-2.4216	2.3656	-63.854	-69.112	0	0	0	0.49708
-2.4215	2.3657	-63.823	-69.177	0	0	0	0.49722
-2.4214	2.3658	-63.97	-69.231	0	0	0	0.49736
-2.4213	2.3659	-63.912	-69.119	0	0	0	0.4975
-2.4212	2.366	-63.949	-69.167	0	0	0	0.49765
-2.4211	2.3661	-64.025	-69.219	0	0	0	0.49779
-2.421	2.3662	-63.991	-69.131	0	0	0	0.49794
-2.4209	2.3663	-64.086	-69.146	0	0	0	0.49809
-2.4208	2.3664	-64.007	-69.164	0	0	0	0.49824
-2.4207	2.3665	-64.037	-69.241	0	0	0	0.49839
-2.4206	2.3666	-64.095	-69.186	0	0	0	0.49855
-2.4205	2.3667	-64.031	-69.234	0	0	0	0.4987
-2.4204	2.3668	-64.123	-69.201	0	0	0	0.49886
-2.4203	2.3669	-64.199	-69.228	0	0	0	0.49901
-2.4202	2.3669	-64.062	-69.283	0	0	0	0.49917
-2.4201	2.367	-64.135	-69.329	0	0	0	0.49933
-2.42	2.3671	-64.025	-69.335	0	0	0	0.4995
-2.4199	2.3672	-64.058	-69.192	0	0	0	0.49966
-2.4198	2.3673	-64.217	-69.302	0	0	0	0.49983
-2.4197	2.3674	-64.055	-69.268	0	0	0	0.49999
-2.4196	2.3675	-64.171	-69.195	0	0	0	0.50016
-2.4195	2.3676	-64.126	-69.219	0	0	0	0.50033
-2.4194	2.3677	-64.113	-69.289	0	0	0	0.50051
-2.4193	2.3678	-64.095	-69.265	0	0	0	0.50068
-2.4192	2.3679	-64.171	-69.32	0	0	0	0.50086
-2.4191	2.368	-64.159	-69.332	0	0	0	0.50104
-2.419	2.3681	-64.071	-69.125	0	0	0	0.50122
-2.4189	2.3682	-63.955	-69.286	0	0	0	0.5014
-2.4188	2.3683	-64.11	-69.241	0	0	0	0.50158
-2.4187	2.3684	-64.171	-69.21	0	0	0	0.50177
-2.4186	2.3685	-64.141	-69.25	0	0	0	0.50196
-2.4185	2.3686	-64.171	-69.305	0	0	0	0.50215
-2.4184	2.3687	-64.074	-69.418	0	0	0	0.50234
-2.4183	2.3688	-64.11	-69.305	0	0	0	0.50254
-2.4182	2.3689	-64.116	-69.326	0	0	0	0.50273
-2.4181	2.369	-64.123	-69.378	0	0	0	0.50293
-2.418	2.3691	-64.22	-69.259	0	0	0	0.50313
-2.4179	2.3692	-64.19	-69.329	0	0	0	0.50334
-2.4178	2.3693	-64.19	-69.274	0	0	0	0.50354
-2.4177	2.3694	-64.214	-69.384	0	0	0	0.50375
-2.4176	2.3695	-64.226	-69.305	0	0	0	0.50396
-2.4175	2.3696	-64.245	-69.314	0	0	0	0.50418
-2.4174	2.3697	-64.235	-69.378	0	0	0	0.50439
-2.4173	2.3698	-64.214	-69.35	0	0	0	0.50461
-2.4172	2.3699	-64.312	-69.323	0	0	0	0.50483
-2.4171	2.37	-64.196	-69.335	0	0	0	0.50505
-2.417	2.3701	-64.162	-69.247	0	0	0	0.50528
-2.4169	2.3702	-64.272	-69.375	0	0	0	0.5055
-2.4168	2.3703	-64.235	-69.305	0	0	0	0.50573
-2.4167	2.3704	-64.214	-69.326	0	0	0	0.50597
-2.4166	2.3705	-64.199	-69.448	0	0	0	0.5062
-2.4165	2.3706	-64.11	-69.531	0	0	0	0.50644
-2.4164	2.3707	-64.217	-69.421	0	0	0	0.50668
-2.4163	2.3708	-64.126	-69.387	0	0	0	0.50692
-2.4162	2.3709	-64.205	-69.445	0	0	0	0.50717
-2.4161	2.3709	-64.168	-69.466	0	0	0	0.50742
-2.416	2.371	-64.071	-69.494	0	0	0	0.50767
-2.4159	2.3711	-64.226	-69.64	0	0	0	0.50792
-2.4158	2.3712	-64.113	-69.555	0	0	0	0.50818
-2.4157	2.3713	-64.187	-69.534	0	0	0	0.50844
-2.4156	2.3714	-64.141	-69.497	0	0	0	0.5087
-2.4155	2.3715	-64.235	-69.634	0	0	0	0.50896
-2.4154	2.3716	-64.242	-69.598	0	0	0	0.50923
-2.4153	2.3717	-64.217	-69.607	0	0	0	0.5095
-2.4152	2.3718	-64.254	-69.534	0	0	0	0.50978
-2.4151	2.3719	-64.214	-69.466	0	0	0	0.51005
-2.415	2.372	-64.287	-69.631	0	0	0	0.51033
-2.4149	2.3721	-64.248	-69.631	0	0	0	0.51061
-2.4148	2.3722	-64.184	-69.482	0	0	0	0.5109
-2.4147	2.3723	-64.263	-69.537	0	0	0	0.51119
-2.4146	2.3724	-64.251	-69.561	0	0	0	0.51148
-2.4145	2.3725	-64.342	-69.662	0	0	0	0.51177
-2.4144	2.3726	-64.226	-69.558	0	0	0	0.51207
-2.4143	2.3727	-64.15	-69.582	0	0	0	0.51237
-2.4142	2.3728	-64.071	-69.665	0	0	0	0.51268
-2.4141	2.3729	-64.153	-69.711	0	0	0	0.51298
-2.414	2.373	-64.266	-69.686	0	0	0	0.51329
-2.4139	2.3731	-64.184	-69.732	0	0	0	0.51361
-2.4138	2.3732	-64.016	-69.628	0	0	0	0.51392
-2.4137	2.3733	-64.095	-69.634	0	0	0	0.51424
-2.4136	2.3734	-64.123	-69.589	0	0	0	0.51456
-2.4135	2.3735	-64.016	-69.662	0	0	0	0.51489
-2.4134	2.3736	-64.086	-69.778	0	0	0	0.51522
-2.4133	2.3737	-64.165	-69.732	0	0	0	0.51555
-2.4132	2.3738	-64.132	-69.756	0	0	0	0.51589
-2.4131	2.3739	-64.129	-69.671	0	0	0	0.51622
-2.413	2.374	-64.123	-69.686	0	0	0	0.51657
-2.4129	2.3741	-64.147	-69.613	0	0	0	0.51691
-2.4128	2.3742	-64.135	-69.573	0	0	0	0.51726
-2.4127	2.3743	-64.196	-69.714	0	0	0	0.51761
-2.4126	2.3744	-64.193	-69.674	0	0	0	0.51797
-2.4125	2.3745	-64.162	-69.601	0	0	0	0.51832
-2.4124	2.3746	-64.251	-69.625	0	0	0	0.51869
-2.4123	2.3747	-64.263	-69.756	0	0	0	0.51905
-2.4122	2.3748	-64.129	-69.775	0	0	0	0.51942
-2.4121	2.3749	-64.22	-69.659	0	0	0	0.51979
-2.412	2.375	-64.257	-69.729	0	0	0	0.52017
-2.4119	2.3751	-64.153	-69.689	0	0	0	0.52054
-2.4118	2.3752	-64.144	-69.762	0	0	0	0.52093
-2.4117	2.3753	-64.223	-69.698	0	0	0	0.52131
-2.4116	2.3754	-64.336	-69.848	0	0	0	0.5217
-2.4115	2.3755	-64.242	-69.808	0	0	0	0.52209
-2.4114	2.3756	-64.254	-69.827	0	0	0	0.52249
-2.4113	2.3757	-64.3	-69.769	0	0	0	0.52289
-2.4112	2.3757	-64.22	-69.714	0	0	0	0.52329
-2.4111	2.3758	-64.345	-69.891	0	0	0	0.52369
-2.411	2.3759	-64.345	-69.695	0	0	0	0.5241
-2.4109	2.376	-64.3	-69.787	0	0	0	0.52452
-2.4108	2.3761	-64.403	-69.674	0	0	0	0.52493
-2.4107	2.3762	-64.431	-69.759	0	0	0	0.52535
-2.4106	2.3763	-64.281	-69.766	0	0	0	0.52577
-2.4105	2.3764	-64.376	-69.909	0	0	0	0.5262
-2.4104	2.3765	-64.339	-69.888	0	0	0	0.52663
-2.4103	2.3766	-64.437	-69.854	0	0	0	0.52706
-2.4102	2.3767	-64.425	-69.775	0	0	0	0.5275
-2.4101	2.3768	-64.318	-69.744	0	0	0	0.52794
-2.41	2.3769	-64.351	-69.769	0	0	0	0.52838
-2.4099	2.377	-64.272	-69.866	0	0	0	0.52883
-2.4098	2.3771	-64.226	-69.946	0	0	0	0.52928
-2.4097	2.3772	-64.382	-69.83	0	0	0	0.52973
-2.4096	2.3773	-64.324	-69.839	0	0	0	0.53019
-2.4095	2.3774	-64.409	-69.72	0	0	0	0.53065
-2.4094	2.3775	-64.358	-69.732	0	0	0	0.53112
-2.4093	2.3776	-64.26	-69.836	0	0	0	0.53158
-2.4092	2.3777	-64.437	-69.756	0	0	0	0.53205
-2.4091	2.3778	-64.376	-69.778	0	0	0	0.53253
-2.409	2.3779	-64.409	-69.857	0	0	0	0.53301
-2.4089	2.378	-64.422	-69.863	0	0	0	0.53349
-2.4088	2.3781	-64.446	-69.79	0	0	0	0.53397
-2.4087	2.3782	-64.391	-69.811	0	0	0	0.53446
-2.4086	2.3783	-64.403	-69.756	0	0	0	0.53495
-2.4085	2.3784	-64.33	-69.732	0	0	0	0.53544
-2.4084	2.3785	-64.501	-69.787	0	0	0	0.53594
-2.4083	2.3786	-64.318	-69.778	0	0	0	0.53644
-2.4082	2.3787	-64.431	-69.735	0	0	0	0.53695
-2.4081	2.3788	-64.327	-69.653	0	0	0	0.53745
-2.408	2.3789	-64.315	-69.622	0	0	0	0.53797
-2.4079	2.379	-64.397	-69.778	0	0	0	0.53848
-2.4078	2.3791	-64.419	-69.637	0	0	0	0.539
-2.4077	2.3792	-64.403	-69.534	0	0	0	0.53952
-2.4076	2.3793	-64.477	-69.512	0	0	0	0.54004
-2.4075	2.3794	-64.522	-69.473	0	0	0	0.54057
-2.4074	2.3795	-64.535	-69.375	0	0	0	0.5411
-2.4073	2.3796	-64.489	-69.289	0	0	0	0.54163
-2.4072	2.3797	-64.48	-69.296	0	0	0	0.54217
-2.4071	2.3798	-64.516	-69.122	0	0	0	0.54271
-2.407	2.3799	-64.538	-69.149	0	0	0	0.54325
-2.4069	2.38	-64.406	-69	0	0	0	0.5438
-2.4068	2.3801	-64.492	-69.07	0	0	0	0.54435
-2.4067	2.3802	-64.412	-68.966	0	0	0	0.5449
-2.4066	2.3803	-64.364	-68.972	0	0	0	0.54546
-2.4065	2.3804	-64.483	-68.963	0	0	0	0.54602
-2.4064	2.3805	-64.358	-68.905	0	0	0	0.54658
-2.4063	2.3806	-64.351	-68.865	0	0	0	0.54714
-2.4062	2.3807	-64.388	-68.874	0	0	0	0.54771
-2.4061	2.3808	-64.373	-68.911	0	0	0	0.54828
-2.406	2.3809	-64.361	-68.801	0	0	0	0.54885
-2.4059	2.381	-64.284	-68.902	0	0	0	0.54943
-2.4058	2.3811	-64.33	-68.945	0	0	0	0.55001
-2.4057	2.3812	-64.403	-68.92	0	0	0	0.55059
-2.4056	2.3813	-64.263	-68.929	0	0	0	0.55117
-2.4055	2.3814	-64.327	-69.021	0	0	0	0.55176
-2.4054	2.3815	-64.26	-68.99	0	0	0	0.55235
-2.4053	2.3816	-64.242	-68.78	0	0	0	0.55294
-2.4052	2.3817	-64.364	-68.926	0	0	0	0.55354
-2.4051	2.3817	-64.315	-68.902	0	0	0	0.55414
-2.405	2.3818	-64.297	-68.969	0	0	0	0.55474
-2.4049	2.3819	-64.321	-68.893	0	0	0	0.55534
-2.4048	2.382	-64.4	-69.012	0	0	0	0.55595
-2.4047	2.3821	-64.275	-68.908	0	0	0	0.55656
-2.4046	2.3822	-64.29	-68.96	0	0	0	0.55717
-2.4045	2.3823	-64.275	-69.021	0	0	0	0.55778
-2.4044	2.3824	-64.358	-68.899	0	0	0	0.5584
-2.4043	2.3825	-64.214	-69.088	0	0	0	0.55901
-2.4042	2.3826	-64.351	-68.993	0	0	0	0.55963
-2.4041	2.3827	-64.312	-69.027	0	0	0	0.56026
-2.404	2.3828	-64.364	-69.115	0	0	0	0.56088
-2.4039	2.3829	-64.339	-69.045	0	0	0	0.56151
-2.4038	2.383	-64.257	-68.978	0	0	0	0.56214
-2.4037	2.3831	-64.287	-69.054	0	0	0	0.56277
-2.4036	2.3832	-64.315	-69.137	0	0	0	0.5634
-2.4035	2.3833	-64.376	-69.186	0	0	0	0.56404
-2.4034	2.3834	-64.452	-69.015	0	0	0	0.56468
-2.4033	2.3835	-64.293	-69.115	0	0	0	0.56532
-2.4032	2.3836	-64.239	-69.143	0	0	0	0.56596
-2.4031	2.3837	-64.306	-69.213	0	0	0	0.5666
-2.403	2.3838	-64.367	-69.195	0	0	0	0.56725
-2.4029	2.3839	-64.367	-69.192	0	0	0	0.5679
-2.4028	2.384	-64.297	-69.146	0	0	0	0.56855
-2.4027	2.3841	-64.33	-69.201	0	0	0	0.5692
-2.4026	2.3842	-64.202	-69.259	0	0	0	0.56985
-2.4025	2.3843	-64.19	-69.25	0	0	0	0.5705
-2.4024	2.3844	-64.339	-69.344	0	0	0	0.57116
-2.4023	2.3845	-64.214	-69.305	0	0	0	0.57182
-2.4022	2.3846	-64.245	-69.268	0	0	0	0.57248
-2.4021	2.3847	-64.281	-69.36	0	0	0	0.57314
-2.402	2.3848	-64.3	-69.18	0	0	0	0.5738
-2.4019	2.3849	-64.361	-69.088	0	0	0	0.57446
-2.4018	2.385	-64.269	-69.241	0	0	0	0.57512
-2.4017	2.3851	-64.22	-69.265	0	0	0	0.57579
-2.4016	2.3852	-64.235	-69.152	0	0	0	0.57646
-2.4015	2.3853	-64.287	-68.929	0	0	0	0.57712
-2.4014	2.3854	-64.251	-69.183	0	0	0	0.57779
-2.4013	2.3855	-64.126	-69.131	0	0	0	0.57846
-2.4012	2.3856	-64.19	-69.21	0	0	0	0.57913
-2.4011	2.3857	-64.147	-69.262	0	0	0	0.57981
-2.401	2.3858	-64.043	-69.155	0	0	0	0.58048
-2.4009	2.3859	-64.062	-69.094	0	0	0	0.58115
-2.4008	2.386	-64.065	-69.067	0	0	0	0.58183
-2.4007	2.3861	-63.952	-68.981	0	0	0	0.5825
[truncated: 26,604 more rows]

## Sheet: Fig2K
0	18.167	30.4	23.333	23	22.5	29.125	29.875	31.556	43	29	28.778	22.4	25.5	19.125	11.75	16.833	19.8	24.375	28.429	28.167
6.8534	20.25	NaN	NaN	28.429	26	35.25	31	NaN	NaN	NaN	38.5	NaN	NaN	17.375	14	19.25	17.333	NaN	NaN	NaN
36.218	23.143	NaN	NaN	33.111	29.75	35.375	31.667	NaN	NaN	NaN	36.333	NaN	NaN	21.5	11.2	21.167	20.333	NaN	NaN	NaN
84.185	42.6	NaN	35.429	50.75	35.625	51.5	38.7	NaN	NaN	NaN	35.667	NaN	26.5	27.333	19.5	25.167	25.667	NaN	NaN	NaN
92.353	41.714	NaN	37.333	55.375	44.375	52.857	42.889	NaN	NaN	NaN	37.444	NaN	24.833	32.429	17.5	30.6	22	NaN	NaN	NaN
100	51.286	52.4	54.25	59.75	47.857	42.333	47.1	58	76.333	76.833	38	28.6	25.714	28.25	15.25	31.8	22	29.167	57.571	60.667

[truncated: 3 more sheets: Fig2L, Fig2M, Fig2N]
