# Supplementary material for: Biophysics of object segmentation in a collision-detecting neuron
Source: eLife. 2018 Apr 18;7:e34238. doi: 10.7554/eLife.34238 (PMC5947989; doi:10.7554/eLife.34238)
Supplement: Figure 2—source data 2. — Associated code for generating plots is in the Matlab file Figure2_SourceCode2.m. [file elife-34238-fig2-data2.xlsx]

## Sheet: Fig2-S1A
-0.099985	3.2852	4.2256	4.7367	4.8721	2.9465	3.4751	3.5436	4.0097
-0.099935	3.2944	4.2203	4.7398	4.8721	2.9404	3.4766	3.5436	4.0097
-0.099885	3.3012	4.2203	4.7444	4.8798	2.9404	3.469	3.5513	4.0067
-0.099836	3.3012	4.2279	4.749	4.8874	2.9404	3.4735	3.562	4.0006
-0.099786	3.2974	4.2393	4.749	4.8874	2.9449	3.472	3.5681	3.9823
-0.099736	3.3005	4.2546	4.749	4.8874	2.9411	3.4735	3.5696	3.967
-0.099686	3.2928	4.2508	4.752	4.8798	2.9358	3.4819	3.5726	3.967
-0.099636	3.2906	4.2607	4.752	4.8721	2.9404	3.4766	3.5726	3.967
-0.099587	3.2921	4.2569	4.7688	4.866	2.9404	3.4857	3.5726	3.9563
-0.099537	3.2959	4.2577	4.7718	4.8721	2.9427	3.4819	3.5772	3.9563
-0.099487	3.2959	4.2699	4.7718	4.8798	2.9442	3.4743	3.5803	3.9487
-0.099437	3.2959	4.2699	4.7688	4.8874	2.9427	3.4758	3.5833	3.9456
-0.099387	3.2959	4.2699	4.752	4.9103	2.9419	3.4789	3.5833	3.9456
-0.099337	3.2921	4.2699	4.7612	4.9438	2.9404	3.4789	3.5833	3.9487
-0.099288	3.2997	4.2699	4.7505	4.9438	2.9396	3.4835	3.5833	3.9411
-0.099238	3.302	4.2706	4.749	4.9438	2.9366	3.4758	3.5833	3.9289
-0.099188	3.3058	4.2828	4.749	4.95	2.9381	3.4667	3.5833	3.9243
-0.099138	3.3119	4.292	4.7459	4.95	2.9343	3.4575	3.5833	3.9243
-0.099088	3.3134	4.2943	4.7398	4.9362	2.9343	3.4575	3.5833	3.9243
-0.099039	3.3134	4.2973	4.7352	4.9057	2.9289	3.4613	3.5833	3.9228
-0.098989	3.3134	4.2973	4.723	4.9057	2.9266	3.469	3.5833	3.9228
-0.098939	3.3134	4.3073	4.7062	4.924	2.9266	3.4682	3.594	3.9228
-0.098889	3.3119	4.3149	4.7016	4.924	2.9305	3.4613	3.594	3.9212
-0.098839	3.3127	4.3217	4.7016	4.924	2.9411	3.4613	3.5833	3.9151
-0.098789	3.3226	4.3294	4.691	4.924	2.9427	3.4583	3.5833	3.9106
-0.09874	3.3348	4.334	4.6727	4.924	2.9434	3.4545	3.5833	3.9106
-0.09869	3.3401	4.3385	4.6635	4.924	2.9388	3.4499	3.594	3.9075
-0.09864	3.347	4.3378	4.6727	4.9057	2.9327	3.4506	3.6047	3.8938
-0.09859	3.363	4.3332	4.6727	4.9057	2.9243	3.4568	3.6047	3.8816
-0.09854	3.3638	4.3286	4.6635	4.9057	2.9205	3.459	3.5986	3.8724
-0.098491	3.3585	4.324	4.6635	4.895	2.9175	3.4598	3.5894	3.8632
-0.098441	3.3554	4.3225	4.6635	4.895	2.9198	3.4537	3.5894	3.8617
-0.098391	3.3546	4.321	4.6589	4.895	2.9152	3.4461	3.5894	3.8617
-0.098341	3.3546	4.3256	4.6543	4.895	2.9137	3.4484	3.5894	3.8617
-0.098291	3.3508	4.3256	4.6589	4.895	2.9137	3.4506	3.5833	3.8709
-0.098241	3.3455	4.3294	4.6635	4.895	2.9137	3.4552	3.5818	3.8831
-0.098192	3.3455	4.3309	4.6666	4.895	2.9091	3.4529	3.5818	3.8831
-0.098142	3.3455	4.3286	4.6666	4.895	2.9091	3.44	3.5787	3.8831
-0.098092	3.3455	4.3279	4.6635	4.895	2.9091	3.427	3.5742	3.8938
-0.098042	3.3455	4.3263	4.6681	4.8996	2.9114	3.4239	3.5742	3.8938
-0.097992	3.3508	4.3279	4.6849	4.8996	2.9137	3.4186	3.5696	3.8938
-0.097943	3.3546	4.3279	4.6894	4.8996	2.9137	3.4194	3.5696	3.8938
-0.097893	3.3623	4.3301	4.6971	4.895	2.9175	3.4117	3.5696	3.8938
-0.097843	3.3623	4.3378	4.7032	4.8904	2.9198	3.4125	3.5589	3.8938
-0.097793	3.3623	4.3446	4.7047	4.8904	2.9198	3.4087	3.5589	3.8938
-0.097743	3.3623	4.3469	4.7108	4.895	2.9228	3.4171	3.5497	3.8938
-0.097693	3.3623	4.3484	4.7108	4.8889	2.9289	3.4278	3.5589	3.8938
-0.097644	3.3623	4.35	4.7047	4.8843	2.9289	3.4316	3.5589	3.8938
-0.097594	3.3623	4.3561	4.7047	4.8798	2.9259	3.4278	3.5589	3.8938
-0.097544	3.3623	4.3561	4.7047	4.8767	2.9274	3.427	3.5513	3.8983
-0.097494	3.3546	4.3561	4.7047	4.8767	2.9259	3.4262	3.5497	3.906
-0.097444	3.344	4.3561	4.6849	4.8767	2.9243	3.4293	3.5513	3.9136
-0.097395	3.3394	4.3538	4.6574	4.8798	2.9259	3.4308	3.5513	3.9243
-0.097345	3.344	4.3591	4.6498	4.8843	2.9251	3.4316	3.5497	3.9319
-0.097295	3.3524	4.3576	4.6452	4.8904	2.9205	3.4354	3.5452	3.9334
-0.097245	3.3356	4.3614	4.6498	4.8904	2.9167	3.4346	3.5406	3.9334
-0.097195	3.3226	4.3622	4.6498	4.8904	2.9251	3.43	3.5345	3.9334
-0.097145	3.3157	4.3622	4.6498	4.8996	2.9251	3.4285	3.5177	3.9273
-0.097096	3.3066	4.3553	4.6498	4.9026	2.9251	3.4255	3.5024	3.906
-0.097046	3.3028	4.3599	4.6452	4.892	2.9251	3.4209	3.5024	3.8846
-0.096996	3.299	4.3599	4.6406	4.892	2.9251	3.4133	3.5024	3.8694
-0.096946	3.302	4.3599	4.6467	4.892	2.9274	3.4178	3.5024	3.8663
-0.096896	3.2921	4.3515	4.665	4.892	2.9243	3.4255	3.5024	3.8617
-0.096847	3.289	4.3507	4.6849	4.892	2.9213	3.4255	3.5024	3.8571
-0.096797	3.2982	4.3469	4.6849	4.892	2.9213	3.4255	3.5024	3.8526
-0.096747	3.3051	4.3469	4.6849	4.9026	2.9144	3.4217	3.5024	3.8526
-0.096697	3.3089	4.3469	4.6849	4.9179	2.9213	3.4224	3.5024	3.8526
-0.096647	3.3096	4.3469	4.6849	4.9316	2.9312	3.4224	3.5177	3.8465
-0.096597	3.3165	4.35	4.6986	4.9316	2.9312	3.4224	3.5345	3.8419
-0.096548	3.3241	4.3538	4.7047	4.9316	2.9221	3.4133	3.5406	3.8419
-0.096498	3.3264	4.3591	4.7474	4.9332	2.9083	3.4026	3.5452	3.8419
-0.096448	3.3234	4.3607	4.7627	4.9408	2.9022	3.4003	3.5452	3.8419
-0.096398	3.3173	4.3599	4.7627	4.9438	2.8984	3.3988	3.5452	3.8419
-0.096348	3.3173	4.3576	4.7627	4.9438	2.8946	3.398	3.5406	3.8419
-0.096299	3.3157	4.3576	4.7627	4.9438	2.8931	3.3972	3.5345	3.8373
-0.096249	3.3112	4.3576	4.7627	4.9438	2.8931	3.3942	3.5345	3.8373
-0.096199	3.3066	4.3576	4.7627	4.9438	2.8931	3.3942	3.5345	3.8358
-0.096149	3.3012	4.3576	4.7734	4.9637	2.8931	3.3988	3.5345	3.8358
-0.096099	3.299	4.3576	4.752	4.9942	2.8992	3.4072	3.5345	3.8358
-0.096049	3.2974	4.3538	4.7413	5.0079	2.9045	3.4117	3.5238	3.8358
-0.096	3.2883	4.3469	4.7291	5.0171	2.9099	3.411	3.5345	3.8266
-0.09595	3.2784	4.3546	4.7062	5.0201	2.9129	3.4094	3.5406	3.8236
-0.0959	3.2784	4.3561	4.7016	5.0247	2.9045	3.4102	3.5467	3.8266
-0.09585	3.2784	4.3492	4.7139	5.0293	2.9045	3.4148	3.5467	3.8266
-0.0958	3.2761	4.3439	4.7139	5.0308	2.9076	3.4217	3.5467	3.8327
-0.095751	3.2753	4.3416	4.7139	5.0461	2.9076	3.4217	3.562	3.8266
-0.095701	3.2738	4.3492	4.7139	5.0659	2.8976	3.4178	3.5742	3.8236
-0.095651	3.2616	4.3492	4.7245	5.0751	2.8938	3.4239	3.5848	3.8236
-0.095601	3.2463	4.3492	4.7459	5.0751	2.9037	3.4362	3.5848	3.8205
-0.095551	3.2425	4.353	4.7718	5.0812	2.9045	3.443	3.5742	3.8205
-0.095501	3.241	4.3523	4.7779	5.0858	2.9114	3.4461	3.5848	3.8236
-0.095452	3.2379	4.3484	4.7795	5.0919	2.916	3.4484	3.5848	3.8236
-0.095402	3.2349	4.3446	4.7902	5.1178	2.9213	3.4537	3.5848	3.8236
-0.095352	3.2211	4.3393	4.8191	5.1178	2.9251	3.4659	3.5848	3.8205
-0.095302	3.2112	4.3347	4.839	5.1178	2.9213	3.4659	3.5848	3.8159
-0.095252	3.2043	4.3301	4.8725	5.1544	2.9213	3.4705	3.5848	3.8266
-0.095203	3.2005	4.3271	4.8481	5.1727	2.9144	3.4758	3.5742	3.8266
-0.095153	3.1883	4.3217	4.8207	5.1788	2.9182	3.4758	3.5742	3.8343
-0.095103	3.1784	4.3103	4.8207	5.1819	2.9213	3.4774	3.5742	3.8358
-0.095053	3.1616	4.3034	4.8207	5.1865	2.9282	3.4789	3.5742	3.8434
-0.095003	3.1586	4.3019	4.8161	5.1941	2.9282	3.4812	3.5742	3.8541
-0.094953	3.1563	4.2996	4.8161	5.1865	2.9343	3.4842	3.5742	3.8648
-0.094904	3.1494	4.2996	4.8069	5.1819	2.9327	3.4865	3.5742	3.877
-0.094854	3.1387	4.2996	4.8069	5.1865	2.935	3.4941	3.5742	3.877
-0.094804	3.1326	4.305	4.8161	5.1865	2.9396	3.5018	3.5772	3.8861
-0.094754	3.1288	4.3011	4.8161	5.1941	2.9449	3.5018	3.5879	3.8922
-0.094704	3.1151	4.2928	4.8069	5.1971	2.9465	3.5018	3.5879	3.9029
-0.094655	3.1052	4.2928	4.7963	5.1987	2.948	3.5018	3.5879	3.9151
-0.094605	3.096	4.2928	4.7947	5.2017	2.9457	3.5018	3.5879	3.9212
-0.094555	3.0907	4.2928	4.7886	5.2094	2.9411	3.5063	3.5772	3.9197
-0.094505	3.0884	4.3011	4.781	5.2246	2.9343	3.5063	3.5742	3.9197
-0.094455	3.0823	4.3118	4.781	5.2338	2.9343	3.4987	3.5696	3.9136
-0.094405	3.0746	4.3156	4.7764	5.2338	2.9297	3.4949	3.565	3.9136
-0.094356	3.0716	4.3156	4.7734	5.2353	2.9297	3.4972	3.5604	3.9258
-0.094306	3.0716	4.3156	4.7718	5.2429	2.9198	3.5018	3.5604	3.9258
-0.094256	3.0716	4.3156	4.7688	5.2429	2.916	3.498	3.5604	3.9258
-0.094206	3.0632	4.3156	4.7688	5.2429	2.916	3.5041	3.5604	3.9136
-0.094156	3.0602	4.3187	4.7688	5.2521	2.9213	3.5102	3.5574	3.9182
-0.094107	3.054	4.3156	4.7688	5.2628	2.9236	3.5132	3.5482	3.9182
-0.094057	3.0518	4.305	4.7688	5.275	2.9259	3.5163	3.5375	3.9182
-0.094007	3.0533	4.2928	4.7688	5.275	2.932	3.5269	3.5269	3.9182
-0.093957	3.0655	4.2798	4.7596	5.275	2.9366	3.5315	3.5116	3.906
-0.093907	3.0754	4.2714	4.7734	5.2811	2.9404	3.5277	3.4994	3.906
-0.093857	3.08	4.2722	4.7917	5.2841	2.9404	3.5239	3.4994	3.906
-0.093808	3.083	4.2699	4.8008	5.2902	2.9411	3.5216	3.4994	3.8983
-0.093758	3.0945	4.2638	4.8191	5.2963	2.9434	3.5185	3.4994	3.906
-0.093708	3.1036	4.2393	4.8619	5.2963	2.9457	3.5163	3.4994	3.9029
-0.093658	3.1052	4.2355	4.8619	5.2963	2.9541	3.5132	3.4811	3.9029
-0.093608	3.1082	4.2325	4.8893	5.3024	2.9541	3.5132	3.4689	3.8983
-0.093559	3.112	4.2172	4.8939	5.3162	2.9549	3.5163	3.4643	3.8983
-0.093509	3.1181	4.205	4.8985	5.3268	2.9564	3.5193	3.4567	3.8983
-0.093459	3.1212	4.2065	4.9046	5.3329	2.9587	3.517	3.4506	3.9029
-0.093409	3.1227	4.1959	4.9107	5.3421	2.964	3.514	3.4353	3.9029
-0.093359	3.1303	4.1806	4.9153	5.3467	2.9701	3.514	3.4216	3.9029
-0.093309	3.138	4.1776	4.9397	5.3543	2.9755	3.5109	3.4094	3.8983
-0.09326	3.154	4.1692	4.9656	5.3452	2.9793	3.5086	3.3956	3.8953
-0.09321	3.17	4.157	4.9809	5.3299	2.9762	3.5056	3.3956	3.8892
-0.09316	3.1769	4.1501	4.9916	5.3146	2.9701	3.498	3.3987	3.8892
-0.09311	3.186	4.1447	4.9916	5.304	2.9694	3.4888	3.3987	3.8892
-0.09306	3.1914	4.1371	4.9946	5.304	2.9701	3.4812	3.3926	3.8953
-0.093011	3.1937	4.1333	4.9977	5.304	2.9694	3.4835	3.3926	3.8892
-0.092961	3.1982	4.1158	4.9992	5.3009	2.9579	3.4789	3.388	3.88
-0.092911	3.2021	4.1028	4.9977	5.2933	2.9549	3.4659	3.388	3.877
-0.092861	3.2051	4.0959	4.9961	5.2841	2.9457	3.4613	3.388	3.8739
-0.092811	3.2089	4.0936	4.9961	5.278	2.9388	3.4613	3.3895	3.8648
-0.092761	3.2097	4.0997	4.9931	5.2704	2.9388	3.4613	3.3972	3.8648
-0.092712	3.2104	4.0982	4.9916	5.2612	2.9388	3.4613	3.4002	3.8648
-0.092662	3.2181	4.0944	4.9885	5.2551	2.9404	3.4613	3.4002	3.8571
-0.092612	3.2356	4.0921	4.9885	5.2551	2.9442	3.456	3.4002	3.8571
-0.092562	3.2494	4.0883	4.9885	5.2505	2.9503	3.4491	3.4002	3.8571
-0.092512	3.2494	4.0898	4.9916	5.2444	2.9556	3.443	3.4017	3.8571
-0.092463	3.2539	4.086	4.9885	5.2444	2.9617	3.4392	3.4094	3.8495
-0.092413	3.27	4.0875	4.9855	5.2338	2.9617	3.4499	3.4246	3.8266
-0.092363	3.2944	4.0837	4.9778	5.2261	2.961	3.4598	3.4094	3.8129
-0.092313	3.3096	4.0646	4.9672	5.2231	2.9602	3.4598	3.4094	3.8144
-0.092263	3.3173	4.0631	4.9672	5.2139	2.9617	3.456	3.4094	3.8083
-0.092213	3.3188	4.0616	4.9672	5.1971	2.9648	3.459	3.4094	3.8083
-0.092164	3.3211	4.0471	4.9641	5.1788	2.9701	3.459	3.4094	3.8144
-0.092114	3.3211	4.0463	4.9641	5.1697	2.9747	3.4522	3.4124	3.822
-0.092064	3.3295	4.0395	4.9595	5.162	2.9739	3.4522	3.4353	3.8251
-0.092014	3.3302	4.0303	4.9519	5.1544	2.9785	3.4606	3.4506	3.8251
-0.091964	3.3386	4.0204	4.9473	5.1544	2.9808	3.4697	3.4536	3.8251
-0.091915	3.3432	4.015	4.9473	5.1483	2.977	3.485	3.4521	3.822
-0.091865	3.3432	4.0105	4.9443	5.1285	2.9747	3.4888	3.4521	3.8144
-0.091815	3.3386	4.0105	4.9443	5.1132	2.99	3.4934	3.4521	3.8144
-0.091765	3.3363	4.012	4.9412	5.1056	2.9938	3.4934	3.4521	3.8144
-0.091715	3.3363	4.012	4.9397	5.0934	2.9922	3.4987	3.4521	3.8144
-0.091665	3.3371	4.0097	4.9336	5.0888	2.9922	3.4888	3.4521	3.8083
-0.091616	3.3417	4.0089	4.9336	5.0812	2.9915	3.4918	3.4521	3.8083
-0.091566	3.3432	4.0089	4.9153	5.0674	2.9961	3.4957	3.4521	3.8083
-0.091516	3.3432	4.0089	4.9031	5.0613	2.9961	3.4972	3.4521	3.8083
-0.091466	3.3371	4.0089	4.9031	5.0598	2.9991	3.4972	3.4628	3.8083
-0.091416	3.3333	4.0112	4.9031	5.0568	2.9999	3.4957	3.4811	3.8068
-0.091367	3.3272	4.012	4.9015	5.043	2.9999	3.4903	3.4933	3.8068
-0.091317	3.3234	4.0105	4.8954	5.0278	2.9999	3.485	3.4933	3.8083
-0.091267	3.3218	4.0074	4.9015	5.0201	2.9999	3.485	3.4933	3.8144
-0.091217	3.3142	4.0067	4.8954	5.0095	2.9991	3.485	3.4811	3.8144
-0.091167	3.3058	4.0021	4.8909	4.9835	2.9999	3.4903	3.4811	3.822
-0.091117	3.2982	3.9975	4.8863	4.9515	2.9984	3.4918	3.4811	3.8251
-0.091068	3.2982	3.996	4.8863	4.9332	2.993	3.4865	3.4811	3.8282
-0.091018	3.3058	3.9952	4.8863	4.924	2.9861	3.4789	3.4933	3.8388
-0.090968	3.3089	3.9914	4.8817	4.921	2.9785	3.4888	3.4979	3.8388
-0.090918	3.3241	3.9899	4.8756	4.9179	2.9778	3.4888	3.5009	3.8495
-0.090868	3.3318	3.9906	4.8573	4.9088	2.9778	3.4827	3.504	3.8495
-0.090819	3.3318	3.9868	4.8405	4.8904	2.9755	3.4743	3.5055	3.8495
-0.090769	3.334	3.9868	4.8405	4.8706	2.9755	3.4743	3.5086	3.8541
-0.090719	3.331	3.9868	4.8405	4.8615	2.9778	3.4789	3.5116	3.8602
-0.090669	3.3371	3.9868	4.8405	4.8615	2.9831	3.4857	3.5086	3.8694
-0.090619	3.3524	3.9922	4.8405	4.8599	2.9877	3.4873	3.5055	3.8694
-0.090569	3.3562	3.9922	4.8405	4.8553	2.9922	3.4774	3.5055	3.8694
-0.09052	3.3524	3.9922	4.8405	4.8477	2.9922	3.4705	3.5055	3.8694
-0.09047	3.3562	3.9922	4.8405	4.8401	2.9861	3.4667	3.5086	3.8694
-0.09042	3.3562	3.9922	4.8405	4.8233	2.9846	3.4682	3.5055	3.8755
-0.09037	3.3524	3.9944	4.8405	4.8096	2.9846	3.4682	3.5086	3.8816
-0.09032	3.3478	3.9983	4.8405	4.805	2.9984	3.4667	3.5116	3.8877
-0.090271	3.3478	3.999	4.8405	4.7989	2.9984	3.4667	3.5131	3.8907
-0.090221	3.3524	3.9998	4.8405	4.7913	3.0067	3.469	3.5131	3.8922
-0.090171	3.3424	4.0036	4.8527	4.7775	3.0113	3.4667	3.5131	3.8938
-0.090121	3.3279	4.0082	4.8527	4.7409	3.0022	3.4629	3.5131	3.8968
-0.090071	3.3134	4.0128	4.8313	4.7134	2.9877	3.4575	3.5131	3.8999
-0.090021	3.2997	4.0128	4.8252	4.7073	2.9793	3.4476	3.5131	3.8999
-0.089972	3.2822	4.0089	4.8176	4.7012	2.9732	3.4407	3.5131	3.9029
-0.089922	3.273	4.0028	4.8252	4.7012	2.964	3.4362	3.5131	3.9136
-0.089872	3.2669	3.999	4.8313	4.7012	2.9533	3.4362	3.5116	3.9319
-0.089822	3.2631	4.0013	4.8588	4.6906	2.9533	3.4392	3.5116	3.9441
-0.089772	3.26	4.0036	4.8527	4.6738	2.9381	3.4445	3.5131	3.9472
-0.089723	3.2555	4.0059	4.8527	4.6585	2.9358	3.4392	3.5131	3.9533
-0.089673	3.2394	4.0067	4.8527	4.6494	2.9388	3.4392	3.5024	3.9609
-0.089623	3.2211	4.0074	4.8313	4.6494	2.9373	3.4445	3.4963	3.9609
-0.089573	3.2127	4.0021	4.8313	4.6494	2.9366	3.4468	3.4918	3.9807
-0.089523	3.2135	4.0067	4.8313	4.6494	2.9289	3.4468	3.4857	4.0036
-0.089473	3.2082	4.0036	4.8191	4.6494	2.9289	3.44	3.4826	4.0158
-0.089424	3.1952	4.0028	4.8191	4.6463	2.9289	3.44	3.4719	4.0296
-0.089374	3.1853	4.0005	4.8191	4.6463	2.9243	3.4484	3.4719	4.0509
-0.089324	3.183	4.0005	4.8191	4.6463	2.9106	3.4484	3.4643	4.0677
-0.089274	3.1815	3.9998	4.8069	4.6494	2.903	3.4484	3.4567	4.0677
-0.089224	3.186	4.0021	4.8054	4.6494	2.8976	3.4468	3.4521	4.0677
-0.089175	3.1754	4.0059	4.7932	4.6371	2.8999	3.4545	3.4521	4.0677
-0.089125	3.1532	4.0112	4.7932	4.6188	2.9015	3.4537	3.4521	4.0616
-0.089075	3.1487	4.0158	4.7642	4.6127	2.8969	3.4415	3.4414	4.0464
-0.089025	3.138	4.0173	4.7383	4.6112	2.8969	3.4514	3.4323	4.0464
-0.088975	3.1296	4.0234	4.7291	4.6097	2.8984	3.4445	3.4307	4.0631
-0.088925	3.1342	4.028	4.7261	4.6051	2.8984	3.4362	3.4292	4.0784
-0.088876	3.1395	4.0326	4.7139	4.5975	2.8984	3.4384	3.4185	4.0723
-0.088826	3.1227	4.0341	4.6986	4.5853	2.9015	3.4384	3.4185	4.057
-0.088776	3.1052	4.0425	4.6879	4.57	2.9015	3.4392	3.4185	4.0402
-0.088726	3.0968	4.054	4.6818	4.5624	2.9037	3.4415	3.4185	4.0265
-0.088676	3.0968	4.0601	4.6803	4.5578	2.9099	3.4468	3.4078	4.0158
-0.088627	3.0968	4.0654	4.6681	4.5578	2.9099	3.4514	3.4078	4.0113
-0.088577	3.0891	4.0654	4.6467	4.5578	2.9099	3.4484	3.4078	4.0067
-0.088527	3.0853	4.0654	4.6345	4.5624	2.9175	3.4453	3.4078	4.0067
-0.088477	3.0708	4.0677	4.633	4.5624	2.9251	3.44	3.4078	4.0067
-0.088427	3.0571	4.0646	4.633	4.5578	2.9251	3.4392	3.4078	4.0067
-0.088377	3.0533	4.0585	4.633	4.5578	2.9221	3.4407	3.4185	4.0067
-0.088328	3.0464	4.0608	4.633	4.5578	2.9221	3.4384	3.4185	4.0067
-0.088278	3.0357	4.0585	4.633	4.5624	2.9282	3.4438	3.4292	4.0067
-0.088228	3.0228	4.0601	4.6208	4.5624	2.9221	3.4476	3.4307	4.0113
-0.088178	3.0159	4.057	4.6208	4.5624	2.9221	3.4423	3.4307	4.0113
-0.088128	3.0098	4.054	4.6208	4.5578	2.9221	3.4354	3.4307	4.0067
-0.088079	3.0014	4.0532	4.6208	4.5578	2.9282	3.4278	3.42	4.0006
-0.088029	2.9938	4.0509	4.6193	4.5517	2.9312	3.4194	3.4307	3.9991
-0.087979	2.9877	4.0555	4.6193	4.5441	2.9358	3.4133	3.42	3.9975
-0.087929	2.9861	4.0547	4.6315	4.5441	2.9457	3.4102	3.42	3.9929
-0.087879	2.9884	4.0479	4.6193	4.5517	2.9381	3.4079	3.42	3.9899
-0.087829	2.9938	4.041	4.6315	4.5578	2.9381	3.4056	3.42	3.9853
-0.08778	2.9953	4.0379	4.633	4.5624	2.9381	3.4026	3.42	3.9792
-0.08773	2.9961	4.0326	4.6315	4.5624	2.9404	3.3965	3.4246	3.9716
-0.08768	3.0121	4.0273	4.6315	4.5593	2.9434	3.3927	3.42	3.9441
-0.08763	3.0121	4.0196	4.6254	4.5593	2.9472	3.3919	3.42	3.9197
-0.08758	3.0182	4.0059	4.6116	4.5593	2.9518	3.3904	3.42	3.9121
-0.087531	3.0243	3.9983	4.5872	4.5685	2.9594	3.3904	3.4109	3.9075
-0.087481	3.0312	3.996	4.5597	4.5685	2.9655	3.3904	3.3987	3.8999
-0.087431	3.0426	3.9998	4.5399	4.5609	2.9686	3.3904	3.3895	3.8922
-0.087381	3.0502	4.0028	4.5185	4.5609	2.9724	3.3904	3.3941	3.8861
-0.087331	3.0617	4.0036	4.5079	4.5746	2.9808	3.3835	3.3987	3.88
-0.087281	3.0685	3.9998	4.5018	4.5898	2.9877	3.3751	3.3987	3.88
-0.087232	3.0724	3.9998	4.4972	4.599	2.99	3.366	3.4048	3.88
-0.087182	3.0746	4.0044	4.488	4.6021	2.993	3.353	3.4139	3.877
-0.087132	3.0807	4.012	4.4682	4.6021	2.9945	3.3454	3.4231	3.8556
-0.087082	3.0807	4.0166	4.459	4.599	2.9961	3.3454	3.4231	3.8297
-0.087032	3.0807	4.0181	4.4621	4.5898	2.9968	3.3385	3.4231	3.8083
-0.086983	3.0807	4.0204	4.4621	4.5898	3.0029	3.3339	3.4231	3.79
-0.086933	3.0815	4.0211	4.4621	4.599	3.0029	3.3271	3.4231	3.7793
-0.086883	3.0777	4.025	4.459	4.599	3.0045	3.3255	3.4231	3.7793
-0.086833	3.0785	4.0311	4.4438	4.6005	3.0052	3.3194	3.4292	3.7656
-0.086783	3.0785	4.0265	4.4285	4.6005	3.0159	3.3187	3.4384	3.7488
-0.086733	3.0807	4.0265	4.427	4.6005	3.0342	3.3156	3.4353	3.7381
-0.086684	3.0693	4.0334	4.427	4.6005	3.0426	3.3103	3.4216	3.7305
-0.086634	3.0556	4.041	4.427	4.6036	3.0441	3.3011	3.4078	3.7244
-0.086584	3.0533	4.0433	4.4209	4.6051	3.0571	3.3003	3.4048	3.7213
-0.086534	3.0586	4.0463	4.4148	4.6066	3.0693	3.2965	3.4002	3.7183
-0.086484	3.0563	4.0501	4.3934	4.6188	3.0785	3.2935	3.3926	3.7152
-0.086435	3.0563	4.0524	4.3934	4.631	3.0899	3.2912	3.3834	3.7061
-0.086385	3.0563	4.0562	4.3934	4.6371	3.0914	3.2813	3.3666	3.7061
-0.086335	3.064	4.057	4.3934	4.6448	3.0914	3.2759	3.3666	3.7061
-0.086285	3.0663	4.0562	4.3934	4.6478	3.0937	3.2599	3.3514	3.7061
-0.086235	3.0678	4.0562	4.3721	4.6494	3.0891	3.2599	3.3514	3.7061
-0.086185	3.0731	4.054	4.3583	4.6509	3.0952	3.2546	3.3453	3.7152
-0.086136	3.0731	4.054	4.3446	4.657	3.096	3.2538	3.3407	3.7152
-0.086086	3.0678	4.054	4.3446	4.6661	3.0983	3.25	3.3285	3.7152
-0.086036	3.0685	4.054	4.3415	4.6661	3.1052	3.2439	3.3285	3.7152
-0.085986	3.0663	4.0562	4.3339	4.6722	3.112	3.2332	3.3178	3.7107
-0.085936	3.0663	4.0532	4.3339	4.6768	3.1143	3.2332	3.3148	3.7046
-0.085887	3.0693	4.0532	4.3415	4.6768	3.125	3.2324	3.3087	3.7
-0.085837	3.067	4.0547	4.3339	4.6768	3.1418	3.2317	3.3087	3.6985
-0.085787	3.0594	4.0562	4.3232	4.686	3.1448	3.2317	3.3087	3.6939
-0.085737	3.0563	4.0547	4.3171	4.6936	3.1456	3.2317	3.3148	3.6893
-0.085687	3.0533	4.0524	4.3064	4.6936	3.1555	3.2317	3.3148	3.6756
-0.085637	3.0495	4.057	4.3064	4.6936	3.1555	3.2324	3.3178	3.6649
-0.085588	3.0525	4.0532	4.2958	4.6997	3.1517	3.2324	3.3224	3.6588
-0.085538	3.0556	4.0509	4.2927	4.7043	3.1525	3.2324	3.3224	3.6649
-0.085488	3.0602	4.0517	4.2897	4.7073	3.1548	3.2324	3.3224	3.6649
-0.085438	3.0632	4.0479	4.2836	4.715	3.1624	3.2324	3.3178	3.6588
-0.085388	3.0655	4.0479	4.279	4.715	3.1624	3.234	3.3148	3.6588
-0.085339	3.0655	4.0517	4.2759	4.7073	3.1624	3.2355	3.3148	3.6588
-0.085289	3.0624	4.0578	4.2652	4.7043	3.1731	3.237	3.3148	3.6588
-0.085239	3.0701	4.0654	4.2652	4.7073	3.1731	3.237	3.3148	3.6588
-0.085189	3.0754	4.0692	4.2652	4.7073	3.1776	3.237	3.3148	3.6527
-0.085139	3.0769	4.0692	4.2652	4.715	3.1784	3.2393	3.3117	3.6466
-0.085089	3.0754	4.0692	4.2652	4.715	3.1792	3.2454	3.3056	3.642
-0.08504	3.0724	4.0692	4.2652	4.7195	3.1761	3.2454	3.2949	3.6283
-0.08499	3.0685	4.0707	4.2652	4.715	3.1746	3.2469	3.2842	3.6161
-0.08494	3.067	4.0692	4.2591	4.715	3.1776	3.2469	3.2751	3.6161
-0.08489	3.0693	4.0631	4.2683	4.715	3.183	3.2553	3.2659	3.6161
-0.08484	3.0716	4.0517	4.2759	4.7195	3.1876	3.2607	3.2659	3.6283
-0.084791	3.0655	4.0417	4.2652	4.7241	3.1906	3.2645	3.2659	3.6222
-0.084741	3.0571	4.0303	4.2408	4.7241	3.1868	3.2675	3.2751	3.6222
-0.084691	3.0548	4.0158	4.2225	4.7241	3.1792	3.2767	3.2842	3.6267
-0.084641	3.0548	4.0143	4.2195	4.7195	3.1746	3.2973	3.2903	3.6313
-0.084591	3.0548	4.0143	4.2195	4.7195	3.1776	3.3057	3.2903	3.6313
-0.084541	3.0563	4.0059	4.2073	4.7195	3.1769	3.3187	3.2903	3.642
-0.084492	3.0632	4.0059	4.1966	4.7195	3.1815	3.3255	3.2903	3.6512
-0.084442	3.0678	4.0059	4.1661	4.7195	3.183	3.3301	3.2903	3.6634
-0.084392	3.0693	3.999	4.1661	4.7195	3.1815	3.3408	3.2903	3.6908
-0.084342	3.0693	4.0021	4.1661	4.7195	3.1776	3.3545	3.2995	3.7107
-0.084292	3.0693	4.0089	4.1432	4.715	3.1715	3.369	3.3056	3.7183
-0.084243	3.0731	4.0097	4.1264	4.715	3.167	3.3805	3.3087	3.7244
-0.084193	3.0739	4.0173	4.1142	4.715	3.1593	3.3866	3.3087	3.7244
-0.084143	3.0746	4.012	4.1096	4.7195	3.1555	3.398	3.3132	3.7244
-0.084093	3.0739	4.0021	4.1035	4.7195	3.1593	3.414	3.3209	3.7305
-0.084043	3.0731	3.9929	4.1035	4.7195	3.1509	3.4285	3.3254	3.7412
-0.083993	3.0701	3.9845	4.1035	4.7195	3.1448	3.4354	3.3346	3.729
-0.083944	3.0785	3.9815	4.1035	4.7195	3.1532	3.4415	3.3483	3.729
-0.083894	3.0785	3.9784	4.1035	4.7195	3.1616	3.443	3.3636	3.7061
-0.083844	3.0777	3.9754	4.1035	4.715	3.1708	3.4484	3.3636	3.6954
-0.083794	3.0823	3.967	4.0959	4.7073	3.1769	3.4514	3.3758	3.6923
-0.083744	3.0769	3.967	4.0913	4.7073	3.1738	3.4529	3.3865	3.6435
-0.083695	3.0724	3.967	4.0913	4.7028	3.1792	3.4499	3.4063	3.6283
-0.083645	3.0746	3.967	4.0913	4.7028	3.1792	3.4598	3.417	3.6283
-0.083595	3.0746	3.9723	4.0882	4.7028	3.1792	3.4682	3.42	3.6283
-0.083545	3.0746	3.9723	4.0867	4.7028	3.1792	3.4659	3.4262	3.6222
-0.083495	3.0777	3.9578	4.0821	4.7058	3.1792	3.4659	3.4429	3.6222
-0.083445	3.0746	3.9555	4.076	4.7104	3.1746	3.4697	3.4521	3.5977
-0.083396	3.0769	3.9555	4.0684	4.7226	3.1715	3.4697	3.4521	3.5947
-0.083346	3.0785	3.954	4.0608	4.7272	3.1715	3.4697	3.4521	3.6038
-0.083296	3.0823	3.9517	4.0608	4.7272	3.1715	3.4735	3.4368	3.6084
-0.083246	3.0853	3.9578	4.0608	4.7302	3.1693	3.4835	3.4231	3.6222
-0.083196	3.0853	3.9647	4.0547	4.7333	3.157	3.4857	3.4124	3.6389
-0.083147	3.0899	3.9616	4.0333	4.7333	3.1532	3.488	3.4124	3.6389
-0.083097	3.0945	3.9555	4.0135	4.7333	3.1525	3.488	3.4231	3.6222
-0.083047	3.1006	3.9479	4.0089	4.7333	3.1471	3.488	3.4368	3.6084
-0.082997	3.1174	3.9479	3.9967	4.7333	3.1532	3.4911	3.4231	3.6084
-0.082947	3.1265	3.9479	3.9845	4.7302	3.1548	3.4896	3.4185	3.6084
-0.082897	3.1265	3.9571	3.9845	4.7333	3.1548	3.4957	3.4094	3.6084
-0.082848	3.1136	3.9532	3.9845	4.7333	3.1548	3.501	3.4094	3.6084
-0.082798	3.1067	3.9433	3.9799	4.7379	3.1509	3.501	3.4185	3.6222
-0.082748	3.0998	3.9372	3.9753	4.7379	3.1471	3.5041	3.4231	3.6389
-0.082698	3.1136	3.9395	3.9738	4.7424	3.1425	3.501	3.4231	3.6389
-0.082648	3.1189	3.9395	3.9708	4.7424	3.1464	3.4987	3.42	3.6389
-0.082599	3.1181	3.9388	3.9646	4.7424	3.1494	3.4964	3.4094	3.6389
-0.082549	3.1181	3.9357	3.9601	4.7485	3.1609	3.4949	3.3972	3.6389
-0.082499	3.1181	3.9357	3.9555	4.7638	3.1609	3.4926	3.385	3.6389
-0.082449	3.1181	3.9357	3.9479	4.7775	3.1647	3.4911	3.3712	3.6389
-0.082399	3.1174	3.9395	3.9402	4.7882	3.1647	3.4911	3.3712	3.6389
-0.082349	3.1158	3.9471	3.928	4.7882	3.1647	3.4888	3.3712	3.6389
-0.0823	3.112	3.9525	3.9128	4.7882	3.1654	3.4888	3.3636	3.6466
-0.08225	3.1082	3.9586	3.9036	4.7882	3.1685	3.4888	3.3621	3.6557
-0.0822	3.0952	3.9609	3.9128	4.7974	3.1685	3.488	3.356	3.6557
-0.08215	3.0823	3.9662	3.925	4.8004	3.1654	3.4835	3.3468	3.6557
-0.0821	3.0777	3.9685	3.925	4.805	3.1693	3.4796	3.3346	3.6618
-0.082051	3.0716	3.9685	3.9128	4.8111	3.1746	3.4751	3.3209	3.6634
-0.082001	3.0777	3.9632	3.9021	4.8141	3.1708	3.4735	3.3102	3.6634
-0.081951	3.0792	3.9723	3.9006	4.8187	3.1654	3.4735	3.2919	3.6634
-0.081901	3.0792	3.9746	3.9006	4.8248	3.1616	3.4697	3.2705	3.6618
-0.081851	3.0861	3.9685	3.9006	4.8294	3.1631	3.4644	3.2614	3.6618
-0.081801	3.0846	3.9647	3.8975	4.8416	3.1631	3.459	3.2614	3.6618
-0.081752	3.0853	3.9647	3.8929	4.8325	3.1693	3.4545	3.2705	3.6634
-0.081702	3.0899	3.9639	3.8929	4.7958	3.1799	3.456	3.2705	3.6679
-0.081652	3.0922	3.9632	3.8929	4.7958	3.183	3.4522	3.2705	3.6847
-0.081602	3.0991	3.9632	3.899	4.7958	3.1799	3.4529	3.272	3.7046
-0.081552	3.1052	3.9632	3.9021	4.7897	3.1799	3.4537	3.272	3.6847
-0.081503	3.1052	3.9632	3.9021	4.7852	3.1807	3.4537	3.272	3.6847
-0.081453	3.1052	3.9586	3.9006	4.7821	3.1792	3.4537	3.272	3.6847
-0.081403	3.1013	3.954	3.899	4.7821	3.17	3.4545	3.272	3.6847
-0.081353	3.1052	3.954	3.9082	4.7974	3.1593	3.4552	3.272	3.6679
-0.081303	3.1136	3.9586	3.9173	4.7974	3.1532	3.4552	3.2568	3.6679
-0.081253	3.1212	3.9563	3.9204	4.8126	3.1403	3.4583	3.2568	3.6756
-0.081204	3.1303	3.9609	3.9387	4.8172	3.1357	3.4613	3.2568	3.6878
-0.081154	3.1403	3.9586	3.9631	4.8218	3.1326	3.4659	3.2461	3.6878
-0.081104	3.1464	3.954	3.9631	4.8218	3.1326	3.4712	3.24	3.6878
-0.081054	3.1548	3.9555	3.9723	4.8218	3.1227	3.4766	3.24	3.6878
-0.081004	3.167	3.9555	3.9784	4.8218	3.1258	3.4789	3.24	3.7015
-0.080955	3.1677	3.9563	3.986	4.8264	3.1242	3.4926	3.2354	3.7015
-0.080905	3.1761	3.9563	3.9936	4.8309	3.1242	3.5071	3.2339	3.6985
-0.080855	3.1868	3.9563	4.0028	4.8386	3.1242	3.5109	3.2339	3.6985
-0.080805	3.1944	3.9586	4.0287	4.8462	3.1242	3.5147	3.2308	3.6985
-0.080755	3.1944	3.9548	4.0409	4.8477	3.1189	3.53	3.2324	3.6985
-0.080705	3.1982	3.9525	4.0867	4.8477	3.1189	3.543	3.2308	3.6985
-0.080656	3.2028	3.9616	4.0898	4.8477	3.1219	3.5498	3.2308	3.6985
-0.080606	3.2051	3.9647	4.0882	4.8553	3.1189	3.5575	3.2308	3.703
-0.080556	3.2082	3.9662	4.076	4.8645	3.1143	3.562	3.2217	3.703
-0.080506	3.2204	3.9563	4.076	4.8676	3.1097	3.5674	3.208	3.703
-0.080456	3.2288	3.9563	4.076	4.8782	3.1075	3.5788	3.208	3.703
-0.080407	3.2288	3.9563	4.0699	4.8935	3.1075	3.5865	3.208	3.703
-0.080357	3.231	3.951	4.0669	4.8782	3.1097	3.5895	3.208	3.703
-0.080307	3.2349	3.951	4.0654	4.8676	3.1075	3.5948	3.208	3.6985
-0.080257	3.2394	3.951	4.0638	4.8676	3.109	3.6071	3.208	3.703
-0.080207	3.2463	3.9494	4.0577	4.8782	3.1105	3.6101	3.1896	3.7091
-0.080157	3.244	3.9426	4.0516	4.8935	3.1067	3.6276	3.1774	3.7229
-0.080108	3.244	3.9319	4.0455	4.9057	3.0998	3.6368	3.1774	3.7366
-0.080058	3.2455	3.9227	4.0364	4.9179	3.0899	3.6421	3.1774	3.7366
-0.080008	3.2433	3.9082	4.0135	4.924	3.0815	3.6444	3.1896	3.7397
-0.079958	3.2402	3.896	3.9936	4.9179	3.0769	3.646	3.1881	3.7305
-0.079908	3.2303	3.8922	3.9921	4.9179	3.0769	3.649	3.179	3.7397
-0.079859	3.2166	3.8922	3.983	4.9179	3.0746	3.6566	3.1896	3.7397
-0.079809	3.2089	3.8922	3.9677	4.9057	3.0693	3.675	3.1896	3.7397
-0.079759	3.2242	3.8899	3.9616	4.8935	3.0594	3.6917	3.1896	3.7366
-0.079709	3.2288	3.8815	3.9494	4.8935	3.054	3.7032	3.2064	3.7229
-0.079659	3.2394	3.877	3.9204	4.8935	3.0396	3.7078	3.2171	3.7091
-0.079609	3.2463	3.877	3.9006	4.8935	3.0281	3.7108	3.2232	3.703
-0.07956	3.2562	3.877	3.8945	4.8935	3.0144	3.7131	3.2232	3.6954
-0.07951	3.2516	3.8747	3.8761	4.8935	3.0144	3.7131	3.2278	3.6954
-0.07946	3.2478	3.8716	3.8731	4.8935	3.0174	3.7131	3.2308	3.7015
-0.07941	3.2494	3.8716	3.8731	4.9057	3.0037	3.7169	3.2369	3.7061
-0.07936	3.2509	3.8686	3.87	4.8935	2.993	3.7192	3.2415	3.7015
-0.079311	3.26	3.8716	3.87	4.8828	2.9953	3.7215	3.243	3.7015
-0.079261	3.2646	3.8716	3.8731	4.8828	2.9915	3.7215	3.243	3.7015
-0.079211	3.2715	3.8686	3.87	4.8828	2.9877	3.7268	3.2415	3.7015
-0.079161	3.2646	3.8686	3.87	4.8935	2.9808	3.7322	3.2415	3.6954
-0.079111	3.2661	3.8731	3.87	4.9118	2.9793	3.752	3.2415	3.6908
-0.079061	3.2722	3.8678	3.867	4.924	2.9747	3.7749	3.2446	3.6939
-0.079012	3.2776	3.8625	3.8578	4.9118	2.9686	3.7833	3.2537	3.703
-0.078962	3.2852	3.8739	3.8472	4.9118	2.9648	3.7886	3.2598	3.703
-0.078912	3.2852	3.8838	3.8411	4.8935	2.9694	3.7978	3.2934	3.7015
-0.078862	3.2776	3.8937	3.8411	4.8889	2.9655	3.8077	3.3254	3.6923
-0.078812	3.2776	3.9044	3.8411	4.8889	2.9633	3.8115	3.3254	3.6847
-0.078763	3.2852	3.9128	3.8258	4.8889	2.9602	3.8161	3.3361	3.6847
-0.078713	3.2944	3.9014	3.8151	4.8737	2.9617	3.8191	3.3453	3.6847
-0.078663	3.2944	3.8937	3.806	4.866	2.9587	3.8108	3.3911	3.6847
-0.078613	3.2944	3.8884	3.7938	4.8553	2.9556	3.8085	3.4628	3.6923
-0.078563	3.2967	3.893	3.7846	4.837	2.9541	3.8115	3.4918	3.6923
-0.078513	3.3012	3.893	3.7724	4.8294	2.9518	3.8146	3.504	3.6923
-0.078464	3.299	3.8914	3.7846	4.8294	2.9472	3.8207	3.5162	3.6923
-0.078414	3.3005	3.8922	3.7846	4.8294	2.9579	3.8222	3.5208	3.6923
-0.078364	3.3051	3.893	3.7724	4.8294	2.9686	3.8123	3.5162	3.6923
-0.078314	3.3096	3.8869	3.7724	4.8264	2.9686	3.8039	3.5024	3.6923
-0.078264	3.3043	3.893	3.7724	4.8233	2.9686	3.8039	3.4918	3.7015
-0.078215	3.2982	3.893	3.7724	4.8111	2.9686	3.8077	3.4918	3.7046
-0.078165	3.2959	3.8968	3.7724	4.7974	2.9709	3.7978	3.4796	3.7046
-0.078115	3.2959	3.9059	3.7617	4.7852	2.9747	3.794	3.475	3.7076
-0.078065	3.2959	3.9059	3.7419	4.7668	2.9716	3.7909	3.449	3.703
-0.078015	3.2921	3.9082	3.7388	4.7531	2.9663	3.7871	3.3911	3.6847
-0.077965	3.289	3.9021	3.7281	4.7501	2.9671	3.7833	3.3544	3.6634
-0.077916	3.289	3.896	3.7068	4.744	2.9724	3.781	3.3544	3.6557
-0.077866	3.289	3.8907	3.69	4.744	2.9724	3.7749	3.3529	3.6481
-0.077816	3.289	3.8914	3.6763	4.744	2.9724	3.7749	3.3407	3.6435
-0.077766	3.2913	3.8998	3.6595	4.7363	2.9671	3.7665	3.3209	3.6435
-0.077716	3.2906	3.9113	3.6473	4.7348	2.9579	3.7696	3.3026	3.6435
-0.077667	3.2967	3.9197	3.6229	4.7333	2.9541	3.7635	3.2873	3.6389
-0.077617	3.2982	3.9357	3.6229	4.7318	2.9488	3.7604	3.2873	3.6389
-0.077567	3.2982	3.9525	3.6229	4.7256	2.9465	3.752	3.2873	3.6374
-0.077517	3.2944	3.9548	3.6229	4.7089	2.9503	3.7421	3.2873	3.6374
-0.077467	3.2898	3.9548	3.6244	4.7089	2.9549	3.7383	3.2873	3.6374
-0.077417	3.2837	3.9555	3.6244	4.7256	2.9549	3.7322	3.2827	3.6359
-0.077368	3.2776	3.9426	3.6229	4.7211	2.948	3.7253	3.2827	3.6267
-0.077318	3.2738	3.9311	3.6229	4.7089	2.9526	3.7223	3.2827	3.6115
-0.077268	3.2761	3.9319	3.6213	4.7089	2.9549	3.7223	3.2934	3.6069
-0.077218	3.2753	3.9357	3.6213	4.7211	2.9572	3.7154	3.2934	3.6222
-0.077168	3.2761	3.9471	3.6213	4.7272	2.9526	3.7123	3.301	3.6222
-0.077119	3.2677	3.9471	3.6229	4.7272	2.9503	3.7093	3.3071	3.6222
-0.077069	3.2608	3.9372	3.6229	4.7272	2.9465	3.7093	3.3758	3.6222
-0.077019	3.26	3.9525	3.6213	4.7272	2.9442	3.7093	3.4429	3.6222
-0.076969	3.26	3.9685	3.6198	4.7211	2.9419	3.7085	3.4811	3.6222
-0.076919	3.2631	3.9746	3.6213	4.7211	2.9442	3.7047	3.5177	3.6222
-0.076869	3.273	3.9777	3.6229	4.7211	2.9442	3.7024	3.5223	3.6222
-0.07682	3.2722	3.9769	3.6229	4.7272	2.9419	3.6994	3.5284	3.6222
-0.07677	3.2555	3.9792	3.6244	4.7318	2.9411	3.6994	3.5406	3.6222
-0.07672	3.2516	3.9861	3.6229	4.7272	2.9434	3.6994	3.5406	3.6222
-0.07667	3.2555	3.9822	3.6213	4.7211	2.9411	3.6994	3.5528	3.6374
-0.07662	3.2715	3.9792	3.6198	4.718	2.9427	3.7024	3.5574	3.645
-0.076571	3.2852	3.9952	3.6198	4.7073	2.9488	3.6986	3.5574	3.6542
-0.076521	3.2761	4.0067	3.6198	4.6982	2.9526	3.691	3.5589	3.6695
-0.076471	3.2768	4.012	3.6198	4.6982	2.9564	3.694	3.5589	3.6862
-0.076421	3.2768	4.0173	3.6198	4.6982	2.9564	3.691	3.5528	3.6923
-0.076371	3.2791	4.0189	3.6213	4.7073	2.9541	3.691	3.5467	3.6969
-0.076321	3.2898	4.0211	3.6213	4.718	2.951	3.6864	3.5406	3.703
-0.076272	3.2944	4.0227	3.6213	4.718	2.951	3.6917	3.533	3.7061
-0.076222	3.3028	4.0288	3.6198	4.7073	2.948	3.6925	3.5253	3.7091
-0.076172	3.3096	4.0356	3.6198	4.6921	2.9427	3.6925	3.5177	3.7091
-0.076122	3.3119	4.0417	3.6198	4.6921	2.9366	3.6956	3.5024	3.7091
-0.076072	3.3089	4.0509	3.6198	4.6921	2.9396	3.7001	3.5177	3.6969
-0.076023	3.3005	4.0593	3.6213	4.7073	2.935	3.6956	3.5253	3.6969
-0.075973	3.3005	4.0746	3.6259	4.7073	2.932	3.6841	3.5253	3.6817
-0.075923	3.2967	4.0868	3.6259	4.7073	2.932	3.6772	3.5253	3.6817
-0.075873	3.2852	4.099	3.629	4.7073	2.932	3.6734	3.5253	3.6817
-0.075823	3.2745	4.128	3.6305	4.7073	2.932	3.678	3.5253	3.6756
-0.075773	3.2715	4.1638	3.6366	4.718	2.935	3.6772	3.5253	3.6756
-0.075724	3.2738	4.1859	3.6381	4.7211	2.9335	3.6688	3.5253	3.671
-0.075674	3.2745	4.2035	3.6473	4.7211	2.9312	3.6688	3.5253	3.6649
-0.075624	3.2745	4.2195	3.6518	4.7272	2.9297	3.6658	3.5177	3.6649
-0.075574	3.2745	4.2393	3.6518	4.7348	2.9297	3.6727	3.5253	3.6649
-0.075524	3.2784	4.2531	3.6549	4.7348	2.9282	3.6635	3.5284	3.6634
-0.075475	3.2822	4.2744	3.661	4.7348	2.9221	3.6681	3.5284	3.6603
-0.075425	3.2837	4.2996	3.6625	4.7348	2.9305	3.6574	3.5269	3.6603
-0.075375	3.286	4.3103	3.6641	4.7455	2.935	3.6482	3.5253	3.6603
-0.075325	3.2845	4.3179	3.6671	4.7577	2.9358	3.636	3.5253	3.6603
-0.075275	3.2837	4.3301	3.6732	4.7577	2.9335	3.636	3.5192	3.6603
-0.075225	3.2829	4.337	3.6793	4.7577	2.9297	3.636	3.5024	3.6603
-0.075176	3.2822	4.3256	3.6915	4.7577	2.9213	3.633	3.4887	3.6603
-0.075126	3.2845	4.3195	3.7205	4.7577	2.9114	3.6307	3.4811	3.6603
-0.075076	3.2867	4.3027	3.7617	4.7653	2.9106	3.6299	3.4674	3.6603
-0.075026	3.2867	4.2897	3.8075	4.7653	2.906	3.6246	3.4674	3.6603
-0.074976	3.2799	4.2905	3.8166	4.7607	2.8984	3.6238	3.4384	3.6603
-0.074927	3.2921	4.2874	3.8258	4.7455	2.8938	3.6208	3.4384	3.6603
-0.074877	3.2959	4.2867	3.8258	4.7455	2.8954	3.6208	3.4384	3.6603
-0.074827	3.2997	4.2973	3.8258	4.7455	2.8923	3.6177	3.4384	3.6557
-0.074777	3.302	4.3019	3.8319	4.7607	2.8862	3.6139	3.4384	3.6557
-0.074727	3.3058	4.3042	3.8395	4.7607	2.8831	3.6101	3.4384	3.6557
-0.074677	3.3112	4.3004	3.8578	4.7424	2.8831	3.5994	3.4384	3.6557
-0.074628	3.315	4.2805	3.8578	4.7424	2.8816	3.5964	3.4384	3.642
-0.074578	3.3173	4.2561	3.8578	4.7424	2.8816	3.5926	3.4384	3.6267
-0.074528	3.3226	4.2409	3.8914	4.7501	2.8816	3.588	3.4384	3.6222
-0.074478	3.3257	4.2302	3.9479	4.7714	2.8732	3.5826	3.4384	3.613
-0.074428	3.3249	4.2256	3.9845	4.7501	2.8793	3.5803	3.4384	3.5932
-0.074379	3.3226	4.2241	3.9875	4.7256	2.8801	3.5796	3.4384	3.5779
-0.074329	3.3195	4.2203	3.9891	4.7134	2.8824	3.5773	3.4506	3.5688
-0.074279	3.3195	4.218	4.0074	4.7058	2.8755	3.5849	3.4643	3.5565
-0.074229	3.3195	4.2165	4.0348	4.7058	2.8671	3.5773	3.4612	3.5565
-0.074179	3.3272	4.2043	4.0486	4.7134	2.8641	3.5704	3.4551	3.5565
-0.074129	3.3363	4.202	4.0638	4.7134	2.8625	3.562	3.4551	3.5398
-0.07408	3.3356	4.2004	4.0806	4.7134	2.8603	3.5582	3.4551	3.5291
-0.07403	3.3356	4.1989	4.0974	4.7134	2.8595	3.5544	3.4612	3.5276
-0.07398	3.3356	4.1936	4.1111	4.7058	2.8587	3.5506	3.4582	3.5306
-0.07393	3.3287	4.1913	4.1172	4.7028	2.8549	3.5437	3.4582	3.5306
-0.07388	3.3203	4.1905	4.1203	4.6951	2.8549	3.5437	3.4582	3.5321
-0.073831	3.3066	4.1905	4.1233	4.6844	2.8549	3.5369	3.4582	3.5367
-0.073781	3.2951	4.1844	4.1264	4.6844	2.8587	3.5338	3.4582	3.5443
-0.073731	3.2867	4.1714	4.1401	4.6951	2.8603	3.5315	3.4612	3.5489
-0.073681	3.2768	4.1653	4.1554	4.7028	2.8572	3.5315	3.4719	3.5489
-0.073631	3.273	4.1661	4.1645	4.6951	2.861	3.5308	3.4826	3.552
-0.073581	3.2768	4.1638	4.1737	4.6951	2.8603	3.5269	3.4826	3.5565
-0.073532	3.2768	4.1585	4.1813	4.6951	2.8603	3.5308	3.4826	3.5565
-0.073482	3.273	4.1409	4.1813	4.6951	2.861	3.5262	3.4872	3.5565
-0.073432	3.27	4.1249	4.1813	4.6844	2.8625	3.5193	3.4933	3.5565
-0.073382	3.2669	4.1173	4.1844	4.6814	2.8625	3.514	3.4902	3.5565
-0.073332	3.2646	4.115	4.1844	4.6844	2.8572	3.5109	3.4826	3.5565
-0.073283	3.2646	4.1112	4.1844	4.6844	2.8458	3.5048	3.478	3.5565
-0.073233	3.2623	4.1035	4.1844	4.6844	2.8328	3.4987	3.4719	3.5596
-0.073183	3.2616	4.0997	4.1829	4.6844	2.8305	3.4957	3.4643	3.5749
-0.073133	3.26	4.0936	4.1783	4.6844	2.8275	3.4934	3.4643	3.5733
-0.073083	3.26	4.0829	4.1737	4.6829	2.8221	3.4911	3.4643	3.552
-0.073033	3.2585	4.07	4.1523	4.6829	2.813	3.4896	3.4612	3.552
-0.072984	3.257	4.0585	4.1325	4.6844	2.803	3.4873	3.4612	3.5733
-0.072934	3.2585	4.0532	4.1294	4.6844	2.7893	3.485	3.4582	3.5733
-0.072884	3.2585	4.0463	4.1233	4.6844	2.7885	3.485	3.4536	3.5733
-0.072834	3.2578	4.0334	4.1249	4.6844	2.7885	3.4819	3.4536	3.552
-0.072784	3.26	4.0227	4.1249	4.689	2.7878	3.4812	3.4445	3.5352
-0.072735	3.26	4.0128	4.1111	4.6967	2.7786	3.4758	3.4384	3.552
-0.072685	3.2578	4.0112	4.0943	4.7043	2.7779	3.4705	3.4384	3.552
-0.072635	3.2562	4.0181	4.0943	4.7058	2.7786	3.4705	3.4384	3.552
-0.072585	3.2547	4.0181	4.0943	4.7058	2.7802	3.469	3.4384	3.5733
-0.072535	3.2547	4.0181	4.0593	4.6967	2.7809	3.4659	3.4368	3.5733
-0.072485	3.2532	4.0189	4.0226	4.6967	2.7779	3.4651	3.4368	3.552
-0.072436	3.2494	4.0173	4.012	4.7058	2.7817	3.4606	3.4323	3.5733
-0.072386	3.2494	4.0044	4.0013	4.7104	2.7786	3.4568	3.4246	3.581
-0.072336	3.2486	3.9853	3.9799	4.7134	2.7756	3.4537	3.4185	3.581
-0.072286	3.2402	3.9777	3.9631	4.7134	2.7702	3.4506	3.4155	3.5733
-0.072236	3.2402	3.951	3.9616	4.7134	2.7679	3.4476	3.4109	3.581
-0.072187	3.2318	3.922	3.9463	4.7134	2.7702	3.4453	3.4048	3.5825
-0.072137	3.2257	3.9044	3.9219	4.7089	2.7695	3.4445	3.3789	3.5825
-0.072087	3.2135	3.8907	3.9128	4.7073	2.7702	3.4438	3.3483	3.581
-0.072037	3.2051	3.88	3.9097	4.7073	2.7733	3.4415	3.3346	3.581
-0.071987	3.2021	3.8564	3.9051	4.7073	2.7733	3.4377	3.3346	3.5825
-0.071937	3.1944	3.8396	3.9051	4.7119	2.7733	3.4331	3.3346	3.5794
-0.071888	3.1944	3.8297	3.8945	4.7134	2.7733	3.43	3.3285	3.5718
-0.071838	3.1883	3.8297	3.8823	4.7134	2.7718	3.4293	3.327	3.5718
-0.071788	3.1906	3.8174	3.8777	4.7134	2.7687	3.4232	3.3209	3.5718
-0.071738	3.1906	3.8159	3.8716	4.7134	2.7756	3.4232	3.3132	3.5794
-0.071688	3.1883	3.8113	3.8716	4.7134	2.7763	3.4255	3.3041	3.581
-0.071639	3.1921	3.8091	3.8655	4.7134	2.7779	3.4232	3.2888	3.581
-0.071589	3.196	3.8052	3.8655	4.7134	2.784	3.4156	3.2888	3.581
-0.071539	3.196	3.8014	3.8624	4.7134	2.784	3.4156	3.2888	3.584
-0.071489	3.1776	3.7923	3.8578	4.7134	2.784	3.4094	3.2888	3.584
-0.071439	3.1761	3.7839	3.8533	4.7134	2.7809	3.4072	3.2888	3.5855
-0.071389	3.1754	3.7724	3.8395	4.7134	2.7763	3.4049	3.2888	3.5855
-0.07134	3.1738	3.7617	3.8395	4.7134	2.7794	3.4018	3.2888	3.5855
-0.07129	3.1761	3.7534	3.8273	4.7134	2.7863	3.4003	3.2888	3.5855
-0.07124	3.1837	3.7534	3.8273	4.7134	2.7985	3.4003	3.2888	3.5855
-0.07119	3.1883	3.7534	3.8243	4.7134	2.7992	3.4018	3.2888	3.5855
-0.07114	3.1845	3.7534	3.8136	4.7134	2.7924	3.3965	3.2736	3.5886
-0.071091	3.1708	3.745	3.8044	4.7119	2.7924	3.398	3.2736	3.5886
-0.071041	3.1624	3.7366	3.8029	4.7134	2.7924	3.3965	3.2659	3.552
-0.070991	3.1563	3.7343	3.7983	4.7043	2.7924	3.4026	3.2659	3.5245
-0.070941	3.1563	3.7305	3.7983	4.6738	2.7924	3.4041	3.2583	3.5092
-0.070891	3.1563	3.7282	3.8029	4.6249	2.7931	3.4087	3.2461	3.5016
-0.070841	3.1517	3.7282	3.8044	4.6005	2.7931	3.4026	3.2614	3.526
-0.070792	3.1441	3.7274	3.8029	4.5837	2.7931	3.3965	3.2797	3.5337
-0.070742	3.1395	3.7236	3.8029	4.5868	2.8023	3.3995	3.2873	3.5504
-0.070692	3.1334	3.7236	3.8029	4.5883	2.8076	3.4087	3.2903	3.5718
-0.070642	3.1288	3.7198	3.8044	4.6112	2.8137	3.4064	3.2873	3.5947
-0.070592	3.1235	3.7144	3.806	4.6356	2.8236	3.3942	3.2812	3.6267
-0.070543	3.1174	3.7053	3.806	4.6463	2.8297	3.3888	3.2812	3.645
-0.070493	3.1075	3.7083	3.8044	4.6692	2.8305	3.3881	3.2751	3.6618
-0.070443	3.0991	3.7083	3.8029	4.6722	2.8305	3.3843	3.2583	3.6756
-0.070393	3.093	3.7122	3.7983	4.6494	2.8305	3.3744	3.24	3.6756
-0.070343	3.0846	3.7122	3.7907	4.6112	2.8297	3.3705	3.2354	3.6679
-0.070293	3.0769	3.7122	3.7907	4.5731	2.8343	3.3675	3.2308	3.6649
-0.070244	3.0739	3.7083	3.7861	4.5609	2.8267	3.3629	3.2354	3.6649
-0.070194	3.0701	3.7083	3.7831	4.5609	2.8152	3.3606	3.2354	3.6649
-0.070144	3.0663	3.7129	3.7785	4.5593	2.8046	3.3614	3.2354	3.6573
-0.070094	3.064	3.7167	3.7739	4.5593	2.8023	3.3621	3.2354	3.645
-0.070044	3.0609	3.7244	3.7693	4.5593	2.8069	3.3606	3.2354	3.6283
-0.069995	3.0518	3.7312	3.7693	4.5593	2.803	3.3591	3.2354	3.6191
-0.069945	3.0472	3.7236	3.777	4.5532	2.8053	3.3591	3.2354	3.6161
-0.069895	3.0426	3.7259	3.777	4.5517	2.8053	3.3621	3.2507	3.6145
-0.069845	3.0357	3.7228	3.777	4.5441	2.8114	3.356	3.2507	3.613
-0.069795	3.0251	3.719	3.777	4.5334	2.8107	3.3507	3.2354	3.61
-0.069745	3.0151	3.719	3.7831	4.5334	2.813	3.3507	3.2308	3.6069
-0.069696	3.006	3.719	3.78	4.5441	2.8152	3.3538	3.2308	3.6069
-0.069646	2.9953	3.719	3.7754	4.5441	2.8198	3.3553	3.2308	3.5993
-0.069596	2.9808	3.719	3.78	4.5349	2.8198	3.3553	3.2308	3.5901
-0.069546	2.9747	3.7236	3.8014	4.5349	2.8221	3.3568	3.2278	3.5871
-0.069496	2.9747	3.7274	3.8258	4.5517	2.8259	3.3553	3.2278	3.5855
-0.069447	2.9747	3.7274	3.8746	4.5624	2.8282	3.3614	3.2278	3.5825
-0.069397	2.9724	3.7274	3.9387	4.5685	2.832	3.3698	3.2278	3.5794
-0.069347	2.9724	3.7198	3.9784	4.5761	2.8336	3.3759	3.2308	3.5794
-0.069297	2.9755	3.7152	3.9921	4.5837	2.832	3.3789	3.2354	3.5794
-0.069247	2.977	3.7038	4.015	4.5837	2.832	3.3759	3.2354	3.5794
-0.069197	2.9785	3.7144	4.0364	4.5837	2.832	3.3744	3.2354	3.5718
-0.069148	2.9785	3.719	4.0364	4.5837	2.8252	3.3759	3.2446	3.5626
-0.069098	2.9839	3.7228	4.0364	4.5837	2.8183	3.3759	3.2583	3.5596
-0.069048	2.9823	3.7274	4.0364	4.599	2.813	3.3736	3.2583	3.555
-0.068998	2.9793	3.7297	4.0333	4.6066	2.8099	3.3766	3.2583	3.5321
-0.068948	2.9877	3.7297	4.0272	4.6066	2.8099	3.3927	3.24	3.5077
-0.068899	2.9877	3.7297	4.0226	4.6066	2.8099	3.4117	3.2278	3.5077
-0.068849	2.9861	3.7381	4.0226	4.6066	2.8099	3.4178	3.2278	3.5077
-0.068799	2.9877	3.7381	4.0272	4.6066	2.8046	3.4209	3.2278	3.5077
-0.068749	2.9884	3.7328	4.0272	4.6066	2.8046	3.4133	3.2278	3.5016
-0.068699	2.9892	3.7259	4.0272	4.6066	2.8046	3.4094	3.2278	3.5016
-0.068649	2.9839	3.7228	4.0226	4.6066	2.7977	3.4087	3.2278	3.5016
-0.0686	2.9793	3.7206	4.0196	4.6066	2.7946	3.4064	3.2278	3.5016
-0.06855	2.9716	3.7206	4.0196	4.6066	2.7924	3.4011	3.2278	3.5016
-0.0685	2.9709	3.7259	4.0226	4.6066	2.7901	3.3972	3.2278	3.5062
-0.06845	2.9701	3.7259	4.0272	4.6066	2.7901	3.3904	3.2278	3.4986
-0.0684	2.9663	3.7228	4.0333	4.6066	2.7885	3.3774	3.2247	3.4909
-0.068351	2.9526	3.7114	4.0364	4.6066	2.7855	3.3774	3.269	3.4818
-0.068301	2.9411	3.7114	4.0394	4.6066	2.7863	3.3759	3.3071	3.4772
-0.068251	2.9404	3.7114	4.0348	4.5914	2.7756	3.3705	3.3117	3.4741
-0.068201	2.9404	3.7	4.0272	4.5914	2.7695	3.3805	3.3331	3.4711
-0.068151	2.935	3.6954	4.0226	4.5914	2.7725	3.3736	3.3743	3.4711
-0.068101	2.932	3.6954	4.0196	4.5746	2.7763	3.3698	3.4002	3.4711
-0.068052	2.9251	3.6931	4.0104	4.567	2.774	3.3683	3.4048	3.4711
-0.068002	2.9213	3.6908	3.9997	4.5624	2.7725	3.3667	3.4048	3.4711
-0.067952	2.9175	3.6969	3.9921	4.5593	2.7771	3.3644	3.4078	3.4741
-0.067902	2.9152	3.6893	3.9631	4.5502	2.7725	3.3644	3.4078	3.4772
-0.067852	2.9182	3.6816	3.9631	4.541	2.7679	3.3637	3.4078	3.4772
-0.067803	2.9182	3.6801	3.9631	4.5364	2.7634	3.3637	3.4094	3.4741
-0.067753	2.916	3.6877	3.9524	4.5334	2.7626	3.3637	3.4094	3.4741
-0.067703	2.9167	3.6885	3.9463	4.5319	2.7626	3.3637	3.417	3.4772
-0.067653	2.9182	3.6885	3.9433	4.5319	2.7626	3.3637	3.4277	3.4741
-0.067603	2.9152	3.6862	3.9387	4.5044	2.7672	3.3637	3.4277	3.4711
-0.067553	2.9129	3.6855	3.928	4.4785	2.7672	3.3637	3.4277	3.4711
-0.067504	2.9091	3.6839	3.9235	4.4708	2.771	3.3614	3.4338	3.4711
-0.067454	2.9091	3.6824	3.9097	4.4632	2.771	3.3515	3.4368	3.468
-0.067404	2.9015	3.6839	3.8929	4.4601	2.7679	3.34	3.4368	3.465
-0.067354	2.8999	3.6839	3.9006	4.4525	2.7679	3.3347	3.4368	3.465
-0.067304	2.8969	3.6839	3.9097	4.4403	2.7679	3.3156	3.4368	3.465
-0.067255	2.9053	3.6824	3.9006	4.4403	2.7794	3.2935	3.4368	3.4619
-0.067205	2.9053	3.6778	3.9006	4.4312	2.7779	3.2866	3.4368	3.4589
-0.067155	2.906	3.6778	3.8914	4.4205	2.7756	3.2805	3.4368	3.4589
-0.067105	2.9083	3.6778	3.8777	4.4205	2.7863	3.2706	3.4368	3.4619
-0.067055	2.9083	3.6641	3.8945	4.4205	2.7779	3.2607	3.4353	3.465
-0.067005	2.9099	3.6641	3.9067	4.4205	2.7702	3.2553	3.4353	3.4741
-0.066956	2.9099	3.674	3.9158	4.4205	2.7672	3.253	3.4399	3.4818
-0.066906	2.9137	3.674	3.9143	4.4205	2.7672	3.2515	3.4353	3.4894
-0.066856	2.9144	3.6641	3.9051	4.4174	2.7672	3.2546	3.4353	3.494
-0.066806	2.919	3.6626	3.899	4.4113	2.7725	3.25	3.4368	3.497
-0.066756	2.9221	3.6641	3.899	4.4098	2.7802	3.2439	3.4368	3.497
-0.066707	2.9198	3.661	3.899	4.4037	2.7802	3.2408	3.4307	3.497
-0.066657	2.919	3.658	3.899	4.3991	2.7824	3.2347	3.4307	3.497
-0.066607	2.919	3.6565	3.899	4.3976	2.787	3.2294	3.4307	3.497
-0.066557	2.9221	3.6565	3.8929	4.3976	2.7786	3.2271	3.4262	3.494
-0.066507	2.9289	3.6526	3.8868	4.3976	2.7702	3.2271	3.4231	3.4894
-0.066457	2.9221	3.6526	3.8594	4.3976	2.7672	3.2263	3.4231	3.4818
-0.066408	2.9198	3.6526	3.8472	4.3976	2.7618	3.2225	3.4231	3.4741
-0.066358	2.919	3.6481	3.8441	4.3976	2.7534	3.2126	3.4231	3.465
-0.066308	2.9167	3.6481	3.8426	4.3976	2.7534	3.2042	3.4262	3.4543
-0.066258	2.916	3.6473	3.8426	4.3991	2.7542	3.2012	3.4262	3.4589
-0.066208	2.9121	3.6427	3.8426	4.3991	2.7588	3.1996	3.4231	3.4589
-0.066159	2.9083	3.6412	3.8441	4.3991	2.7588	3.2012	3.417	3.4589
-0.066109	2.9129	3.6397	3.8472	4.3991	2.7565	3.189	3.4109	3.4543
-0.066059	2.9129	3.6336	3.8594	4.3991	2.7519	3.1729	3.4094	3.4482
-0.066009	2.9137	3.6198	3.8807	4.3991	2.7504	3.1615	3.4094	3.4452
-0.065959	2.9144	3.6107	3.8929	4.4052	2.7451	3.1554	3.3941	3.4452
-0.065909	2.9198	3.6176	3.8823	4.4052	2.7374	3.1531	3.3773	3.4452
-0.06586	2.935	3.629	3.8716	4.3991	2.7313	3.1493	3.3743	3.4452
-0.06581	2.9442	3.6206	3.867	4.3976	2.7298	3.1478	3.3743	3.4452
-0.06576	2.9427	3.6137	3.867	4.3976	2.7298	3.1394	3.3712	3.4452
-0.06571	2.9457	3.6153	3.8716	4.3976	2.7298	3.1356	3.359	3.4421
-0.06566	2.9495	3.6122	3.8716	4.3991	2.7298	3.1325	3.3483	3.4375
-0.065611	2.9488	3.6092	3.8716	4.4052	2.7374	3.134	3.3377	3.4375
-0.065561	2.9434	3.6092	3.867	4.4052	2.7458	3.1371	3.3254	3.4375
-0.065511	2.9449	3.6107	3.8533	4.4052	2.7367	3.1371	3.3254	3.4375
-0.065461	2.9465	3.6038	3.8365	4.4052	2.7298	3.1371	3.3132	3.433
-0.065411	2.9465	3.6015	3.8365	4.4174	2.7252	3.1333	3.301	3.4299
-0.065361	2.9419	3.6031	3.8365	4.4266	2.7237	3.1333	3.2965	3.4253
-0.065312	2.9404	3.6069	3.8365	4.4312	2.7206	3.1333	3.2934	3.433
-0.065262	2.9373	3.6023	3.8212	4.4312	2.7145	3.1241	3.2888	3.433
-0.065212	2.932	3.5931	3.8121	4.4312	2.71	3.1256	3.2736	3.433
-0.065162	2.9427	3.5916	3.8121	4.4296	2.7069	3.1211	3.2553	3.433
-0.065112	2.9358	3.5893	3.8121	4.4266	2.7092	3.1142	3.2476	3.433
-0.065063	2.932	3.5825	3.8121	4.4266	2.7039	3.1073	3.2446	3.433
-0.065013	2.932	3.5893	3.8121	4.4266	2.7084	3.1005	3.2385	3.407
-0.064963	2.9243	3.597	3.8075	4.4266	2.7069	3.0982	3.2324	3.407
-0.064913	2.9205	3.597	3.8014	4.4266	2.7054	3.0989	3.2263	3.433
-0.064863	2.9266	3.5909	3.8105	4.4266	2.7016	3.1027	3.2141	3.4101
-0.064813	2.9228	3.5909	3.8182	4.4266	2.7	3.1043	3.2049	3.4101
-0.064764	2.9243	3.5909	3.8334	4.4235	2.6985	3.0936	3.2049	3.4101
-0.064714	2.9137	3.584	3.8517	4.4235	2.6955	3.0799	3.1759	3.4101
-0.064664	2.9091	3.5764	3.8594	4.4235	2.6932	3.0768	3.153	3.4085
-0.064614	2.9091	3.5825	3.8609	4.4235	2.6932	3.0722	3.1469	3.404
-0.064564	2.9083	3.5817	3.8517	4.4067	2.6932	3.0684	3.1469	3.4009
-0.064515	2.9099	3.5733	3.8243	4.3869	2.6939	3.0677	3.1469	3.3979
-0.064465	2.9099	3.5703	3.7999	4.3777	2.6939	3.0669	3.1393	3.3887
-0.064415	2.9099	3.5703	3.7922	4.361	2.6939	3.0661	3.1393	3.3887
-0.064365	2.9099	3.571	3.7815	4.3488	2.6955	3.0631	3.1317	3.4024
-0.064315	2.9106	3.5771	3.7693	4.3488	2.6978	3.0615	3.1179	3.4299
-0.064265	2.906	3.5771	3.7587	4.3488	2.7	3.0623	3.0981	3.4299
-0.064216	2.8999	3.5771	3.7526	4.3488	2.7031	3.0486	3.0798	3.4513
-0.064166	2.8938	3.5695	3.748	4.3488	2.7069	3.0486	3.0798	3.468
-0.064116	2.8923	3.5649	3.748	4.3488	2.7084	3.0448	3.0798	3.468
-0.064066	2.8877	3.5649	3.748	4.3427	2.726	3.044	3.0721	3.4513
-0.064016	2.8831	3.5649	3.748	4.3365	2.7435	3.0471	3.066	3.4513
-0.063967	2.8801	3.5664	3.7587	4.3304	2.7481	3.0448	3.0721	3.468
-0.063917	2.8763	3.5695	3.7587	4.3304	2.7512	3.0432	3.0721	3.4803
-0.063867	2.8755	3.5703	3.7587	4.3304	2.7534	3.0432	3.0721	3.4803
-0.063817	2.8755	3.584	3.7587	4.3304	2.7534	3.0417	3.066	3.4803
-0.063767	2.8748	3.584	3.7587	4.3365	2.758	3.0364	3.066	3.4803
-0.063717	2.8709	3.584	3.7587	4.3427	2.7634	3.0303	3.0554	3.468
-0.063668	2.8648	3.5794	3.7678	4.3427	2.7657	3.0394	3.063	3.468
-0.063618	2.8618	3.5641	3.7754	4.3427	2.7702	3.0509	3.0721	3.4787
-0.063568	2.8603	3.5619	3.7754	4.3427	2.7725	3.0516	3.0844	3.4864
-0.063518	2.8648	3.558	3.7754	4.3457	2.7748	3.0554	3.0798	3.4879
-0.063468	2.8679	3.5497	3.7754	4.3488	2.7748	3.0554	3.0798	3.494
-0.063419	2.8671	3.542	3.7754	4.3655	2.7847	3.0524	3.0798	3.5047
-0.063369	2.8633	3.5397	3.7754	4.3839	2.7893	3.0524	3.0798	3.5077
-0.063319	2.8587	3.5367	3.7754	4.3869	2.7893	3.0524	3.0798	3.5077
-0.063269	2.8511	3.5329	3.7815	4.3869	2.7893	3.0524	3.0874	3.5077
-0.063219	2.845	3.5291	3.7815	4.3869	2.7893	3.0516	3.092	3.5077
-0.063169	2.8381	3.526	3.7815	4.39	2.7893	3.0524	3.092	3.5077
-0.06312	2.8458	3.5214	3.7815	4.3915	2.7878	3.0539	3.0874	3.497
-0.06307	2.8458	3.5184	3.7907	4.3991	2.7878	3.0539	3.0874	3.4879
-0.06302	2.8389	3.5168	3.7831	4.4067	2.7878	3.0509	3.092	3.4879
-0.06297	2.8366	3.5168	3.7831	4.4083	2.7802	3.0425	3.0935	3.497
-0.06292	2.8252	3.5138	3.7953	4.4205	2.7794	3.0409	3.0935	3.5077
-0.062871	2.8244	3.5092	3.7968	4.4342	2.7794	3.0409	3.0966	3.523
-0.062821	2.8091	3.5062	3.7968	4.4403	2.7748	3.0371	3.1042	3.523
-0.062771	2.7954	3.5062	3.7968	4.4464	2.774	3.0387	3.1133	3.5367
-0.062721	2.7885	3.5062	3.7968	4.4464	2.7702	3.0524	3.1118	3.5367
-0.062671	2.784	3.5031	3.7953	4.4464	2.7664	3.0638	3.1118	3.5367
-0.062621	2.7809	3.4993	3.777	4.4464	2.7657	3.0631	3.1256	3.5428
-0.062572	2.774	3.4993	3.748	4.4418	2.7657	3.0669	3.1469	3.5489
-0.062522	2.7672	3.4993	3.748	4.4373	2.7596	3.0806	3.1576	3.5535
-0.062472	2.7641	3.4993	3.748	4.4373	2.7542	3.0806	3.1729	3.5535
-0.062422	2.7641	3.4962	3.748	4.4418	2.7374	3.0883	3.179	3.5535
-0.062372	2.7603	3.4863	3.748	4.4464	2.7184	3.0951	3.1866	3.5535
-0.062323	2.7504	3.4787	3.748	4.454	2.7176	3.1012	3.1988	3.5535
-0.062273	2.7367	3.4764	3.748	4.454	2.7176	3.1035	3.208	3.5535
-0.062223	2.7298	3.4795	3.748	4.4617	2.7184	3.1081	3.2202	3.5535
-0.062173	2.7367	3.4795	3.7785	4.4647	2.7313	3.1073	3.2369	3.5764
-0.062123	2.7504	3.4718	3.7785	4.4693	2.7367	3.1073	3.2568	3.5886
-0.062073	2.7519	3.4673	3.7785	4.4754	2.7367	3.1043	3.269	3.5947
-0.062024	2.7519	3.4581	3.7968	4.4754	2.7367	3.1005	3.272	3.6344
-0.061974	2.755	3.4451	3.8014	4.4754	2.7412	3.0966	3.272	3.671
-0.061924	2.7603	3.4421	3.8121	4.4754	2.7458	3.1005	3.272	3.6817
-0.061874	2.7687	3.439	3.8227	4.4754	2.7519	3.0951	3.272	3.7046
-0.061824	2.7756	3.4344	3.8395	4.483	2.7451	3.0921	3.2766	3.7335
-0.061775	2.7756	3.4322	3.8533	4.4983	2.7451	3.0883	3.2842	3.7534
-0.061725	2.7786	3.4367	3.8548	4.5151	2.7451	3.0821	3.2888	3.758
-0.061675	2.7878	3.439	3.8655	4.5151	2.7435	3.0753	3.2903	3.7595
-0.061625	2.8168	3.4459	3.8792	4.4983	2.7496	3.0707	3.2949	3.7702
-0.061575	2.8229	3.4459	3.8853	4.483	2.7557	3.0692	3.2995	3.7961
-0.061525	2.8259	3.4383	3.8975	4.483	2.7557	3.0654	3.3026	3.8129
-0.061476	2.8404	3.4367	3.9112	4.4983	2.7565	3.0654	3.3132	3.8175
-0.061426	2.8404	3.4398	3.9112	4.5151	2.7565	3.0654	3.3132	3.822
-0.061376	2.8481	3.4383	3.9112	4.5212	2.7565	3.0654	3.3132	3.8251
-0.061326	2.8435	3.4413	3.9112	4.5212	2.758	3.0707	3.3132	3.8282
-0.061276	2.8389	3.4413	3.9326	4.5212	2.758	3.0707	3.3132	3.8282
-0.061227	2.8397	3.4413	3.9708	4.5242	2.7565	3.0745	3.3132	3.8282
-0.061177	2.8427	3.4344	3.9982	4.5303	2.758	3.0722	3.3132	3.8282
-0.061127	2.8488	3.4383	4.015	4.5364	2.7657	3.0776	3.3026	3.8343
-0.061077	2.8488	3.4421	4.0333	4.541	2.7733	3.0814	3.3026	3.8419
-0.061027	2.845	3.4459	4.0562	4.541	2.7733	3.0814	3.3026	3.8465
-0.060977	2.8397	3.4505	4.0959	4.5364	2.774	3.073	3.2965	3.8495
-0.060928	2.8442	3.4573	4.1294	4.5364	2.7771	3.0638	3.3026	3.8526
-0.060878	2.8481	3.4497	4.1661	4.5364	2.7771	3.0638	3.3071	3.8251
-0.060828	2.8534	3.4497	4.2057	4.541	2.7779	3.0722	3.3026	3.8129
-0.060778	2.8641	3.465	4.2179	4.5486	2.784	3.0783	3.2965	3.8129
-0.060728	2.8702	3.4772	4.221	4.5486	2.7802	3.0783	3.2965	3.8037
-0.060679	2.8687	3.4772	4.2271	4.5563	2.7809	3.0654	3.2965	3.8037
-0.060629	2.8625	3.4772	4.2317	4.5609	2.7809	3.0585	3.2965	3.7992
-0.060579	2.8587	3.4772	4.2378	4.5609	2.7809	3.0554	3.298	3.7976
-0.060529	2.8625	3.4772	4.34	4.5563	2.7817	3.0509	3.301	3.7976
-0.060479	2.8687	3.4772	4.34	4.5486	2.7786	3.0486	3.301	3.7976
-0.060429	2.8809	3.4695	4.3354	4.541	2.7832	3.057	3.301	3.7976
-0.06038	2.8915	3.4619	4.3293	4.5395	2.7893	3.0615	3.3193	3.7976
-0.06033	2.8923	3.4619	4.308	4.5135	2.7931	3.057	3.3193	3.7976
-0.06028	2.8954	3.4573	4.3263	4.5135	2.787	3.0577	3.3346	3.7976
-0.06023	2.8954	3.4619	4.3278	4.5471	2.7794	3.0577	3.3544	3.7976
-0.06018	2.8923	3.4642	4.3324	4.5593	2.7756	3.0577	3.3697	3.7976
-0.060131	2.8923	3.468	4.3507	4.567	2.7756	3.0577	3.3727	3.7976
-0.060081	2.8893	3.4673	4.3675	4.57	2.7756	3.0577	3.3727	3.7976
-0.060031	2.8877	3.4673	4.3675	4.5792	2.7695	3.0577	3.3834	3.7976
-0.059981	2.887	3.4604	4.3675	4.57	2.7756	3.0654	3.385	3.7961
-0.059931	2.8809	3.4581	4.3675	4.567	2.7756	3.0677	3.385	3.7763
-0.059881	2.8809	3.455	4.3782	4.5593	2.7733	3.0631	3.3727	3.7488
-0.059832	2.887	3.455	4.3812	4.5471	2.7733	3.06	3.3697	3.7366
-0.059782	2.8893	3.455	4.3812	4.5471	2.7725	3.0631	3.3697	3.732
-0.059732	2.8976	3.4451	4.3812	4.5471	2.7725	3.0684	3.3697	3.732
-0.059682	2.8946	3.4306	4.366	4.5135	2.7664	3.0684	3.3727	3.732
-0.059632	2.8938	3.4184	4.3614	4.4876	2.7641	3.073	3.3804	3.729
-0.059583	2.8923	3.4138	4.3492	4.483	2.7687	3.0768	3.3834	3.7244
-0.059533	2.8908	3.4108	4.3354	4.483	2.7687	3.0768	3.3865	3.7198
-0.059483	2.8893	3.4108	4.3278	4.4769	2.7718	3.0768	3.3911	3.7198
-0.059433	2.8877	3.407	4.3187	4.48	2.7626	3.0768	3.4155	3.7244
-0.059383	2.8893	3.4024	4.2942	4.5334	2.7573	3.0799	3.4384	3.7274
-0.059333	2.8893	3.3986	4.2698	4.5715	2.7542	3.0799	3.4582	3.7274
-0.059284	2.8915	3.3986	4.2637	4.5929	2.7496	3.0806	3.4796	3.7274
-0.059234	2.8931	3.3871	4.2515	4.6463	2.7496	3.0799	3.4918	3.7274
-0.059184	2.8931	3.3871	4.2347	4.689	2.7466	3.0799	3.4841	3.729
-0.059134	2.8992	3.3772	4.221	4.6967	2.7466	3.0806	3.475	3.7274
-0.059084	2.906	3.3727	4.2088	4.7058	2.7405	3.0821	3.4674	3.7244
-0.059035	2.9121	3.3765	4.1966	4.7134	2.7359	3.0852	3.4506	3.7198
-0.058985	2.9121	3.3734	4.163	4.715	2.7351	3.0852	3.4399	3.7107
-0.058935	2.9205	3.3734	4.1355	4.7211	2.7336	3.0829	3.4399	3.7015
-0.058885	2.9236	3.3665	4.1355	4.7287	2.7351	3.0829	3.4231	3.7015
-0.058835	2.9251	3.3727	4.1355	4.7363	2.7367	3.086	3.4231	3.7015
-0.058785	2.9305	3.3727	4.1355	4.7546	2.7397	3.0875	3.4231	3.6969
-0.058736	2.9381	3.3727	4.134	4.7745	2.7428	3.0875	3.4231	3.6969
-0.058686	2.9396	3.3826	4.1325	4.805	2.7428	3.0875	3.4338	3.6969
-0.058636	2.9442	3.3871	4.1188	4.8294	2.7412	3.0875	3.4445	3.6969
-0.058586	2.9518	3.3871	4.105	4.8294	2.7374	3.0875	3.4445	3.6969
-0.058536	2.9518	3.3818	4.0928	4.8294	2.7336	3.0944	3.4445	3.7015
-0.058487	2.9442	3.3788	4.0806	4.8233	2.7321	3.0989	3.4445	3.7091
-0.058437	2.9518	3.3772	4.073	4.8233	2.7313	3.0989	3.4445	3.7152
-0.058387	2.9518	3.3765	4.0654	4.8126	2.7267	3.0974	3.4445	3.7168
-0.058337	2.9449	3.3742	4.0593	4.7989	2.713	3.089	3.4445	3.7168
-0.058287	2.9228	3.3742	4.0516	4.7928	2.7023	3.086	3.4445	3.7168
-0.058237	2.9045	3.378	4.0593	4.7928	2.6985	3.086	3.4445	3.7168
-0.058188	2.903	3.3849	4.0654	4.7928	2.6985	3.0844	3.4445	3.7168
-0.058138	2.903	3.3849	4.0654	4.7928	2.6985	3.0829	3.4414	3.7168
-0.058088	2.9091	3.3849	4.0593	4.7928	2.6985	3.0821	3.4368	3.7168
-0.058038	2.9091	3.3871	4.0516	4.7836	2.7031	3.0806	3.4353	3.7168
-0.057988	2.9121	3.3925	4.0501	4.776	2.6993	3.0806	3.4353	3.7152
-0.057939	2.9091	3.3978	4.0501	4.776	2.6978	3.0783	3.4292	3.7091
-0.057889	2.9121	3.4055	4.0501	4.776	2.6947	3.0776	3.4231	3.6969
-0.057839	2.9167	3.4093	4.0547	4.7745	2.6901	3.0791	3.4139	3.6969
-0.057789	2.9274	3.41	4.0547	4.7729	2.6871	3.0745	3.3972	3.6969
-0.057739	2.932	3.4108	4.0623	4.7684	2.684	3.0699	3.388	3.6969
-0.057689	2.932	3.4093	4.0699	4.7684	2.6802	3.0669	3.3804	3.6969
-0.05764	2.932	3.41	4.076	4.7729	2.6733	3.0615	3.3712	3.6969
-0.05759	2.9289	3.4108	4.076	4.7745	2.6718	3.0562	3.3819	3.6969
-0.05754	2.9289	3.4108	4.076	4.776	2.6718	3.0448	3.388	3.6832
-0.05749	2.9289	3.4116	4.076	4.776	2.6627	3.0402	3.4048	3.6832
-0.05744	2.9373	3.4146	4.076	4.7745	2.6566	3.0364	3.42	3.6832
-0.057391	2.9442	3.4146	4.076	4.7729	2.6443	3.0341	3.4139	3.6832
-0.057341	2.9472	3.4146	4.0669	4.7729	2.639	3.0272	3.4094	3.6649
-0.057291	2.9442	3.4161	4.0532	4.7592	2.639	3.0211	3.4094	3.6649
-0.057241	2.9434	3.4169	4.044	4.7455	2.639	3.0211	3.4094	3.6481
-0.057191	2.9518	3.4169	4.0394	4.7455	2.6436	3.0211	3.4262	3.6374
-0.057141	2.9701	3.4207	4.0333	4.744	2.6405	3.0089	3.4292	3.6374
-0.057092	2.9762	3.4169	4.0257	4.7394	2.6344	3.0013	3.4292	3.6481
-0.057042	2.9793	3.4138	4.0181	4.7318	2.6337	3.0043	3.4216	3.6649
-0.056992	2.9831	3.4138	4.0104	4.718	2.6337	3.0043	3.4094	3.6649
-0.056942	2.9831	3.4138	4.0013	4.7089	2.6375	3.0074	3.4017	3.6649
-0.056892	2.9869	3.4215	3.9891	4.7012	2.639	3.0081	3.4002	3.6649
-0.056843	2.9869	3.4253	3.9769	4.7012	2.6428	3.0097	3.3956	3.6481
-0.056793	2.9907	3.4261	3.9769	4.7012	2.6436	3.0074	3.3956	3.6374
-0.056743	2.9907	3.4261	3.9692	4.7012	2.6436	3.0028	3.388	3.6283
-0.056693	2.9709	3.4306	3.9646	4.7012	2.6436	2.9975	3.388	3.6283
-0.056643	2.9488	3.4306	3.9601	4.6783	2.6474	2.9967	3.3819	3.6374
-0.056593	2.9442	3.4306	3.9494	4.6585	2.6543	3.0013	3.3819	3.6374
-0.056544	2.9411	3.4306	3.9433	4.6539	2.6588	3.0013	3.3819	3.6374
-0.056494	2.9373	3.4322	3.9341	4.6494	2.6588	3.0066	3.3819	3.6374
-0.056444	2.9327	3.4367	3.9296	4.6371	2.6581	3.0158	3.3819	3.6481
-0.056394	2.9297	3.4352	3.9189	4.6219	2.6543	3.0142	3.3819	3.6481
-0.056344	2.9251	3.4306	3.8838	4.6051	2.6512	3.0104	3.3819	3.6374
-0.056295	2.9198	3.4276	3.8792	4.5898	2.6512	3.0104	3.3926	3.6283
-0.056245	2.9099	3.4306	3.8685	4.6051	2.6543	3.0013	3.3834	3.6237
-0.056195	2.8938	3.4314	3.8594	4.5898	2.6581	2.9891	3.3834	3.6191
-0.056145	2.8854	3.4314	3.8487	4.5822	2.6588	2.9784	3.3819	3.61
-0.056095	2.8824	3.4268	3.8365	4.5822	2.6611	2.9715	3.388	3.6038
-0.056045	2.887	3.423	3.8365	4.5822	2.6672	2.973	3.388	3.5993
-0.055996	2.8854	3.423	3.8334	4.5822	2.6756	2.9692	3.3956	3.5932
-0.055946	2.8854	3.423	3.8243	4.5822	2.6871	2.9669	3.4002	3.5855
-0.055896	2.8938	3.4215	3.8212	4.5898	2.6947	2.9647	3.3956	3.5855
-0.055846	2.8954	3.4222	3.8212	4.6051	2.6962	2.9624	3.3911	3.5855
-0.055796	2.8984	3.4177	3.8212	4.6219	2.697	2.9616	3.3911	3.5855
-0.055747	2.8984	3.4039	3.8197	4.6219	2.7016	2.9601	3.3911	3.5794
-0.055697	2.9022	3.4001	3.8197	4.599	2.7084	2.9524	3.4124	3.5794
-0.055647	2.9106	3.394	3.8197	4.5822	2.71	2.9433	3.417	3.5794
-0.055597	2.9068	3.3879	3.8197	4.5807	2.7176	2.9349	3.42	3.5855
-0.055547	2.8999	3.3879	3.8212	4.5807	2.7206	2.9349	3.4231	3.5855
-0.055497	2.8893	3.3879	3.8243	4.5792	2.7229	2.9257	3.4292	3.581
-0.055448	2.8923	3.3864	3.8304	4.5761	2.7275	2.9257	3.4414	3.5779
-0.055398	2.903	3.3734	3.8304	4.567	2.7351	2.925	3.4597	3.5779
-0.055348	2.9114	3.3772	3.8304	4.5578	2.7466	2.925	3.4841	3.5779
-0.055298	2.9114	3.3757	3.8304	4.5547	2.755	2.9242	3.504	3.581
-0.055248	2.903	3.3719	3.8304	4.5486	2.7534	2.9212	3.5116	3.5855
-0.055199	2.8839	3.3749	3.8487	4.5486	2.7527	2.9135	3.5116	3.5855
-0.055149	2.8641	3.3765	3.8655	4.5258	2.7496	2.9029	3.5116	3.581
-0.055099	2.8732	3.3749	3.8777	4.4998	2.7496	2.8983	3.5269	3.5779
-0.055049	2.8931	3.3757	3.8929	4.4922	2.755	2.8922	3.5436	3.5718
-0.054999	2.8831	3.3788	3.8929	4.4922	2.7611	2.8868	3.5528	3.5779
-0.054949	2.8831	3.3803	3.9067	4.4922	2.7611	2.8853	3.5665	3.5794
-0.0549	2.874	3.3788	3.9067	4.4891	2.7611	2.8815	3.5772	3.5947
-0.05485	2.861	3.378	3.9235	4.4891	2.7641	2.8807	3.5818	3.6054
-0.0548	2.8542	3.3818	3.9387	4.4922	2.7725	2.8784	3.5848	3.6161
-0.05475	2.8542	3.3833	3.9601	4.4907	2.7824	2.8807	3.5864	3.6176
-0.0547	2.8542	3.3879	3.9997	4.4876	2.7725	2.8762	3.5925	3.6054
-0.054651	2.8542	3.3833	3.9997	4.4968	2.7718	2.8762	3.5986	3.5764
-0.054601	2.8458	3.3856	3.9891	4.5074	2.7718	2.8762	3.5986	3.555
-0.054551	2.8435	3.3871	3.9799	4.5074	2.7702	2.883	3.5986	3.555
-0.054501	2.829	3.3856	3.9601	4.5074	2.7679	2.883	3.5925	3.5413
-0.054451	2.8267	3.3887	3.9479	4.5074	2.758	2.883	3.5925	3.5413
-0.054401	2.8267	3.378	3.9601	4.5151	2.7534	2.883	3.5925	3.5413
-0.054352	2.8267	3.3597	3.9601	4.5197	2.7519	2.8708	3.5925	3.5413
-0.054302	2.8267	3.3551	3.9479	4.5273	2.7473	2.867	3.5879	3.552
-0.054252	2.8214	3.3543	3.9479	4.5303	2.7557	2.8693	3.5818	3.5596
-0.054202	2.8145	3.3559	3.9662	4.538	2.7649	2.867	3.5635	3.555
-0.054152	2.813	3.3505	3.9921	4.5624	2.7687	2.8662	3.5467	3.555
-0.054103	2.8122	3.3475	4.0043	4.5807	2.774	2.8662	3.5467	3.5596
-0.054053	2.8198	3.3452	4.0089	4.5822	2.7794	2.8617	3.536	3.5596
-0.054003	2.8229	3.3414	4.0165	4.5898	2.7885	2.8601	3.5299	3.555
-0.053953	2.8275	3.3322	4.0211	4.6005	2.7939	2.8601	3.5238	3.5443
-0.053903	2.8259	3.3299	4.0226	4.6036	2.7931	2.8594	3.5208	3.5352
-0.053853	2.8252	3.3299	4.0257	4.6127	2.8	2.8563	3.5147	3.5337
-0.053804	2.832	3.3269	4.0303	4.6249	2.8107	2.8517	3.5101	3.5245
-0.053754	2.8381	3.3337	4.0379	4.6387	2.8114	2.8517	3.5086	3.5245
-0.053704	2.8374	3.3368	4.0455	4.6402	2.8145	2.8479	3.4994	3.5245
-0.053654	2.8374	3.3406	4.0577	4.6402	2.8198	2.8487	3.4887	3.5245
-0.053604	2.8374	3.3421	4.076	4.6402	2.8214	2.8487	3.4857	3.5245
-0.053555	2.8282	3.3391	4.102	4.6402	2.8214	2.8479	3.4857	3.5337
-0.053505	2.8122	3.3429	4.1203	4.6539	2.8206	2.8479	3.4857	3.5337
-0.053455	2.7992	3.3452	4.1249	4.6539	2.8206	2.8449	3.4857	3.5337
-0.053405	2.7946	3.3452	4.131	4.66	2.8229	2.8456	3.4857	3.5337
-0.053355	2.7893	3.3452	4.1355	4.6631	2.8259	2.8449	3.4979	3.5337
-0.053305	2.7855	3.3467	4.1371	4.6707	2.8267	2.8449	3.4979	3.5337
-0.053256	2.7794	3.3452	4.1371	4.686	2.8328	2.8449	3.4857	3.5398
-0.053206	2.774	3.3475	4.1401	4.686	2.8328	2.8426	3.4857	3.5398
-0.053156	2.771	3.3475	4.1478	4.686	2.8305	2.8395	3.4857	3.5398
-0.053106	2.7672	3.3475	4.1554	4.6997	2.8336	2.8418	3.4857	3.5398
-0.053056	2.7496	3.3475	4.16	4.7058	2.8389	2.8426	3.4857	3.5398
-0.053007	2.7412	3.3498	4.1615	4.7058	2.845	2.8418	3.4857	3.5398
-0.052957	2.7412	3.3566	4.1615	4.7104	2.845	2.8395	3.4719	3.5398
-0.052907	2.7382	3.3597	4.1615	4.7104	2.845	2.835	3.4506	3.5398
-0.052857	2.7229	3.3612	4.1615	4.7104	2.8419	2.8289	3.4399	3.5398
-0.052807	2.697	3.3627	4.1615	4.7165	2.8419	2.8266	3.4399	3.5398
-0.052757	2.6917	3.362	4.1615	4.7226	2.8381	2.8281	3.4506	3.5337
-0.052708	2.684	3.3665	4.1615	4.7272	2.8397	2.8273	3.4506	3.5337
-0.052658	2.6756	3.3688	4.1615	4.7302	2.8397	2.8243	3.4506	3.5428
-0.052608	2.6672	3.3665	4.1615	4.7333	2.8435	2.8189	3.4506	3.5428
-0.052558	2.6512	3.3719	4.1615	4.7363	2.8397	2.8144	3.4506	3.5428
-0.052508	2.6382	3.3894	4.1615	4.7363	2.8381	2.8098	3.4506	3.5428
-0.052459	2.6352	3.3879	4.1615	4.7363	2.8389	2.8067	3.4399	3.5474
-0.052409	2.6352	3.4062	4.1752	4.7363	2.8496	2.8067	3.4399	3.5489
-0.052359	2.6329	3.4146	4.1752	4.747	2.8595	2.8067	3.4399	3.5489
-0.052309	2.6329	3.4154	4.1752	4.7485	2.8557	2.8083	3.4368	3.5535
-0.052259	2.6329	3.4161	4.1752	4.7424	2.8511	2.8083	3.4368	3.5611
-0.052209	2.626	3.4177	4.1752	4.7379	2.8511	2.8098	3.4368	3.5672
-0.05216	2.6192	3.4161	4.1752	4.7379	2.8542	2.8098	3.4368	3.5749
-0.05211	2.6184	3.4177	4.1752	4.7516	2.8595	2.8098	3.4368	3.584
-0.05206	2.6192	3.4398	4.189	4.7775	2.8618	2.8044	3.4368	3.584
-0.05201	2.626	3.4596	4.189	4.8035	2.8618	2.8044	3.4368	3.5932
-0.05196	2.626	3.465	4.1752	4.8111	2.8625	2.8105	3.4368	3.5993
-0.051911	2.626	3.4703	4.1645	4.8218	2.8625	2.8182	3.4368	3.6038
-0.051861	2.626	3.4688	4.1645	4.8416	2.8587	2.8243	3.4368	3.613
-0.051811	2.626	3.455	4.1752	4.8523	2.8572	2.8258	3.4368	3.6267
-0.051761	2.6329	3.4451	4.16	4.8569	2.8496	2.8266	3.4384	3.6359
-0.051711	2.6329	3.4398	4.1752	4.8615	2.8442	2.8311	3.4536	3.6405
-0.051661	2.6352	3.4367	4.1676	4.8645	2.8397	2.8266	3.4796	3.6405
-0.051612	2.636	3.4352	4.1737	4.866	2.8389	2.8273	3.4979	3.6466
-0.051562	2.6352	3.4283	4.1676	4.8782	2.8381	2.8296	3.507	3.6512
-0.051512	2.6367	3.423	4.1676	4.892	2.8404	2.8334	3.5147	3.6573
-0.051462	2.6421	3.4131	4.1676	4.895	2.8404	2.8319	3.5147	3.6634
-0.051412	2.6367	3.4131	4.1676	4.8965	2.8419	2.8342	3.5147	3.6679
-0.051363	2.6375	3.4131	4.1676	4.8965	2.8419	2.838	3.5147	3.674
-0.051313	2.6405	3.4131	4.1676	4.8981	2.8412	2.8418	3.5299	3.6832
-0.051263	2.6535	3.4039	4.1645	4.9103	2.8374	2.8388	3.5467	3.6908
-0.051213	2.6588	3.4039	4.1539	4.9225	2.8336	2.8365	3.5528	3.6939
-0.051163	2.6627	3.3971	4.1417	4.9271	2.8275	2.8357	3.5513	3.6939
-0.051113	2.6802	3.3948	4.1264	4.9393	2.8313	2.8418	3.5513	3.6939
-0.051064	2.6855	3.4047	4.1111	4.9545	2.8336	2.8403	3.5528	3.7
-0.051014	2.6901	3.4062	4.1066	4.9622	2.8328	2.8327	3.5528	3.7046
-0.050964	2.6939	3.4123	4.1111	4.9637	2.8351	2.8296	3.5528	3.7046
-0.050914	2.7	3.4192	4.1264	4.9652	2.8358	2.8273	3.5543	3.7046
-0.050864	2.7222	3.4177	4.1417	4.9713	2.8366	2.8273	3.5574	3.7046
-0.050815	2.7489	3.4161	4.1417	4.9866	2.8366	2.8212	3.5787	3.7046
-0.050765	2.758	3.407	4.1264	4.9988	2.8313	2.8205	3.6047	3.7046
-0.050715	2.7565	3.3971	4.1111	4.9988	2.832	2.8205	3.6108	3.7046
-0.050665	2.7672	3.3879	4.1066	4.9988	2.8305	2.8273	3.6108	3.7046
-0.050615	2.7794	3.3795	4.0989	4.9988	2.8305	2.8258	3.6108	3.7046
-0.050565	2.7817	3.3757	4.0791	5.011	2.8305	2.8258	3.6108	3.7046
-0.050516	2.7863	3.3734	4.0776	5.0247	2.8305	2.8235	3.6123	3.7046
-0.050466	2.7893	3.3665	4.076	5.0293	2.8351	2.822	3.6123	3.7015
-0.050416	2.7893	3.3582	4.0715	5.0293	2.845	2.8197	3.6123	3.6985
-0.050366	2.7893	3.3566	4.0699	5.0293	2.8496	2.8311	3.6123	3.6923
-0.050316	2.7893	3.3482	4.0699	5.0293	2.8488	2.838	3.6184	3.6985
-0.050267	2.7924	3.3444	4.0745	5.0247	2.8488	2.8418	3.6245	3.6985
-0.050217	2.7962	3.3421	4.0745	5.0186	2.8488	2.8403	3.6245	3.6985
-0.050167	2.803	3.3391	4.0745	5.0186	2.8435	2.8418	3.6337	3.6985
-0.050117	2.8015	3.3391	4.0745	5.0186	2.8336	2.8395	3.6337	3.6985
-0.050067	2.8015	3.3376	4.0577	4.9927	2.832	2.8395	3.6337	3.6985
-0.050017	2.7977	3.3414	4.0532	4.9652	2.832	2.8395	3.6337	3.7015
-0.049968	2.7946	3.3414	4.0532	4.9606	2.832	2.8342	3.6337	3.7046
-0.049918	2.7939	3.3368	4.0532	4.9606	2.832	2.8327	3.6337	3.7046
-0.049868	2.7885	3.3353	4.044	4.9576	2.8328	2.8235	3.6337	3.7046
-0.049818	2.7847	3.3345	4.044	4.9545	2.8328	2.825	3.6245	3.7046
-0.049768	2.7794	3.3337	4.0364	4.9545	2.8343	2.8266	3.6245	3.7046
-0.049719	2.7756	3.3337	4.0272	4.9484	2.8351	2.8296	3.6245	3.7076
-0.049669	2.7702	3.3315	4.0165	4.9408	2.8336	2.8357	3.6337	3.7076
-0.049619	2.7618	3.3299	4.0165	4.9301	2.8313	2.8464	3.6337	3.7076
-0.049569	2.7557	3.3246	4.0074	4.9362	2.8297	2.854	3.6337	3.7107
-0.049519	2.7519	3.3223	4.0013	4.9179	2.8313	2.8571	3.6337	3.7152
-0.049469	2.7519	3.32	4.0013	4.9179	2.8343	2.8563	3.6337	3.7152
-0.04942	2.7519	3.3131	4.0074	4.9011	2.8358	2.8464	3.6245	3.7198
-0.04937	2.7519	3.3047	4.0165	4.8889	2.8404	2.8403	3.6184	3.7198
-0.04932	2.7557	3.3025	4.0165	4.8828	2.8404	2.8495	3.6123	3.7198
-0.04927	2.7603	3.3025	4.0287	4.8721	2.8404	2.8594	3.6108	3.7229
-0.04922	2.7657	3.3025	4.0364	4.8599	2.8358	2.8502	3.6001	3.7229
-0.049171	2.7679	3.307	4.0425	4.8553	2.8358	2.8517	3.5818	3.7244
-0.049121	2.7679	3.3185	4.0486	4.8523	2.8419	2.8441	3.5879	3.7244
-0.049071	2.7702	3.3284	4.0577	4.8492	2.8419	2.8441	3.6123	3.7244
-0.049021	2.7733	3.3131	4.0684	4.8218	2.8488	2.8441	3.6123	3.729
-0.048971	2.7725	3.3124	4.073	4.7974	2.8488	2.8456	3.5971	3.7366
-0.048921	2.7718	3.3124	4.0532	4.7867	2.8519	2.8418	3.5971	3.7366
-0.048872	2.7718	3.3124	4.0425	4.776	2.8465	2.8403	3.5971	3.7366
-0.048822	2.7718	3.2948	4.0303	4.7745	2.8465	2.8418	3.5681	3.7366
-0.048772	2.7672	3.2872	4.0684	4.7699	2.8465	2.8433	3.5681	3.7412
-0.048722	2.7672	3.2841	4.0821	4.7577	2.8679	2.8479	3.5681	3.7458
-0.048672	2.7672	3.2796	4.0837	4.7409	2.8702	2.8525	3.5574	3.7458
-0.048623	2.7695	3.2727	4.0837	4.7409	2.8702	2.8563	3.5574	3.758
-0.048573	2.7679	3.2758	4.0837	4.7409	2.8702	2.8662	3.5681	3.7717
-0.048523	2.7672	3.2758	4.0837	4.7409	2.874	2.8739	3.5772	3.7854
-0.048473	2.7725	3.2727	4.0776	4.7302	2.874	2.8739	3.6047	3.7717
-0.048423	2.7756	3.2697	4.0715	4.7241	2.8755	2.8784	3.5772	3.7717
-0.048373	2.7763	3.2681	4.0745	4.7241	2.8755	2.8784	3.5772	3.7488
-0.048324	2.7725	3.2704	4.0745	4.7241	2.8755	2.8784	3.5803	3.729
-0.048274	2.7725	3.2689	4.0745	4.7241	2.8763	2.88	3.6047	3.7259
-0.048224	2.774	3.2651	4.0745	4.7363	2.874	2.883	3.6047	3.7259
-0.048174	2.774	3.2613	4.0837	4.7363	2.8786	2.8815	3.6047	3.7259
-0.048124	2.7733	3.2552	4.0821	4.7363	2.8831	2.88	3.6047	3.7244
-0.048075	2.7687	3.2513	4.0913	4.7546	2.8839	2.88	3.6047	3.7229
-0.048025	2.7672	3.2475	4.0959	4.747	2.8831	2.8815	3.6062	3.7244
-0.047975	2.7641	3.2437	4.0959	4.7424	2.8801	2.8845	3.6062	3.7259
-0.047925	2.7679	3.2407	4.0913	4.7226	2.8809	2.8914	3.6062	3.7259
-0.047875	2.774	3.2407	4.0913	4.7028	2.8824	2.8868	3.6062	3.729
-0.047825	2.774	3.2391	4.0821	4.6997	2.8809	2.8823	3.6062	3.732
-0.047776	2.7702	3.2384	4.0806	4.6722	2.8786	2.8807	3.6138	3.732
-0.047726	2.7672	3.2384	4.076	4.6585	2.8748	2.8739	3.6108	3.7305
-0.047676	2.7618	3.2353	4.076	4.6539	2.8755	2.8823	3.6138	3.7274
-0.047626	2.7603	3.2346	4.076	4.6539	2.8732	2.8891	3.6215	3.7305
-0.047576	2.758	3.233	4.076	4.6539	2.8763	2.8922	3.6215	3.7305
-0.047527	2.758	3.23	4.076	4.6494	2.8809	2.896	3.6138	3.7305
-0.047477	2.7496	3.2246	4.076	4.6402	2.8877	2.899	3.6276	3.732
-0.047427	2.742	3.2201	4.0745	4.6356	2.8915	2.9082	3.6276	3.7534
-0.047377	2.7374	3.2208	4.0745	4.6341	2.8969	2.909	3.6398	3.7763
-0.047327	2.7359	3.2162	4.076	4.628	2.9015	2.909	3.6398	3.7809
-0.047277	2.7336	3.2162	4.076	4.6326	2.9037	2.9074	3.6352	3.7885
-0.047228	2.7351	3.2162	4.076	4.6417	2.9053	2.9029	3.6367	3.7931
-0.047178	2.7397	3.2193	4.0821	4.6463	2.9114	2.8983	3.6367	3.7931
-0.047128	2.7397	3.2269	4.0821	4.6463	2.916	2.8968	3.6367	3.7931
-0.047078	2.7397	3.2399	4.0699	4.6463	2.9205	2.896	3.6398	3.7931
-0.047028	2.7397	3.2468	4.0593	4.6463	2.9243	2.8952	3.6535	3.7992
-0.046979	2.7397	3.2521	4.0501	4.6463	2.9243	2.8914	3.6459	3.8053
-0.046929	2.7397	3.2628	4.0425	4.6478	2.9282	2.8868	3.6459	3.8098
-0.046879	2.7328	3.2735	4.0364	4.6524	2.9373	2.8823	3.6459	3.819
-0.046829	2.7328	3.2872	4.0333	4.6646	2.9419	2.8777	3.6459	3.8373
-0.046779	2.7298	3.3002	4.0318	4.6677	2.9465	2.8685	3.6459	3.8373
-0.046729	2.7275	3.3063	4.0226	4.6585	2.961	2.8662	3.6535	3.8373
-0.04668	2.7206	3.3093	4.0104	4.6585	2.9762	2.8662	3.6535	3.8373
-0.04663	2.7092	3.3192	4.0058	4.6585	2.9831	2.8685	3.6535	3.8373
-0.04658	2.7054	3.3269	4.0028	4.657	2.99	2.8601	3.6535	3.8526
-0.04653	2.71	3.333	4.0013	4.657	2.9976	2.8556	3.6474	3.8358
-0.04648	2.71	3.336	4.0013	4.657	3.0037	2.8556	3.6535	3.819
-0.046431	2.7145	3.336	4.0028	4.657	3.0121	2.8533	3.6581	3.8037
-0.046381	2.7061	3.336	4.0028	4.6524	3.0121	2.854	3.6596	3.8037
-0.046331	2.6985	3.3376	4.0028	4.6524	2.9945	2.8609	3.6611	3.7915
-0.046281	2.697	3.3376	4.0013	4.657	2.9678	2.8639	3.6672	3.7809
-0.046231	2.6833	3.3383	4.0013	4.66	2.9694	2.8563	3.6688	3.7809
-0.046181	2.6634	3.3391	4.0013	4.6677	2.964	2.8495	3.6627	3.7809
-0.046132	2.6634	3.3406	4.0013	4.6738	2.9625	2.8464	3.6474	3.7809
-0.046082	2.681	3.3406	4.0013	4.6753	2.9663	2.8426	3.6352	3.7809
-0.046032	2.681	3.3398	4.0013	4.6753	2.9678	2.8395	3.6291	3.7809
-0.045982	2.6924	3.3421	4.0013	4.6768	2.9701	2.8365	3.6352	3.7763
-0.045932	2.7039	3.3475	4.0013	4.6967	2.9663	2.8311	3.6474	3.7702
-0.045883	2.7145	3.3482	3.9967	4.7195	2.9694	2.8189	3.6627	3.7702
-0.045833	2.7206	3.3582	3.9967	4.7318	2.9671	2.8151	3.6474	3.7702
-0.045783	2.726	3.3673	3.9967	4.7424	2.961	2.8212	3.6627	3.7747
-0.045733	2.7351	3.3734	3.9967	4.7485	2.9503	2.8273	3.6718	3.7809
-0.045683	2.7344	3.3765	3.986	4.7501	2.9495	2.8273	3.6779	3.7809
-0.045633	2.7412	3.3765	3.9753	4.7531	2.9495	2.825	3.6779	3.7839
-0.045584	2.7481	3.3727	3.9616	4.7531	2.9495	2.8151	3.6718	3.7839
-0.045534	2.7588	3.3688	3.957	4.7623	2.9442	2.8037	3.6627	3.7839
-0.045484	2.7672	3.3658	3.9418	4.7623	2.9427	2.8021	3.652	3.7839
-0.045434	2.7695	3.3612	3.9265	4.7531	2.9366	2.7968	3.6398	3.7809
-0.045384	2.774	3.3536	3.9204	4.7501	2.9381	2.7945	3.652	3.7747
-0.045335	2.7786	3.3521	3.9128	4.7501	2.9366	2.7945	3.652	3.7747
-0.045285	2.7809	3.3467	3.9051	4.7485	2.9366	2.7838	3.652	3.7809
-0.045235	2.7809	3.3292	3.8929	4.7409	2.9343	2.7762	3.652	3.7809
-0.045185	2.7893	3.3292	3.8868	4.715	2.9305	2.7732	3.652	3.7809
-0.045135	2.7985	3.3376	3.8929	4.6951	2.9243	2.7785	3.6398	3.7809
-0.045085	2.8008	3.3505	3.8929	4.6921	2.9167	2.7861	3.6398	3.7809
-0.045036	2.8053	3.3414	3.8868	4.6921	2.9037	2.7938	3.6398	3.7732
-0.044986	2.8122	3.3368	3.8868	4.6921	2.8885	2.7976	3.6398	3.7641
-0.044936	2.8122	3.3276	3.8929	4.6921	2.8885	2.8037	3.6398	3.7641
-0.044886	2.8122	3.3276	3.899	4.6921	2.8793	2.8029	3.652	3.7641
-0.044836	2.8198	3.3299	3.9051	4.6921	2.8778	2.8014	3.652	3.7641
-0.044787	2.8244	3.333	3.9235	4.6921	2.8725	2.8006	3.652	3.7641
-0.044737	2.8244	3.333	3.9235	4.6921	2.8725	2.8014	3.6398	3.7641
-0.044687	2.8275	3.3315	3.9235	4.6951	2.8709	2.7976	3.6398	3.7564
-0.044637	2.832	3.3284	3.9402	4.715	2.8687	2.7907	3.6566	3.7564
-0.044587	2.8427	3.3223	3.9418	4.7409	2.8618	2.7816	3.652	3.7564
-0.044537	2.8511	3.3139	3.9509	4.7485	2.8603	2.7892	3.652	3.7564
-0.044488	2.8572	3.3139	3.9814	4.7485	2.8625	2.7938	3.6398	3.7564
-0.044438	2.861	3.3139	3.9799	4.7485	2.8671	2.8014	3.6306	3.7488
-0.044388	2.8572	3.3116	3.9784	4.7485	2.8625	2.8083	3.626	3.7397
-0.044338	2.8572	3.3086	3.9769	4.7501	2.8603	2.8174	3.623	3.7488
-0.044288	2.8603	3.3055	3.9769	4.7531	2.8603	2.8174	3.6215	3.7564
-0.044239	2.8648	3.3002	3.9616	4.7562	2.8656	2.8174	3.6154	3.7564
-0.044189	2.8648	3.2956	3.9433	4.7531	2.8664	2.8174	3.6093	3.7503
-0.044139	2.8633	3.2918	3.9311	4.7501	2.8656	2.8174	3.6093	3.7503
-0.044089	2.861	3.2872	3.9128	4.7501	2.8748	2.8174	3.5986	3.7519
-0.044039	2.8503	3.2933	3.9021	4.7501	2.8862	2.8174	3.5986	3.7519
-0.043989	2.8465	3.291	3.8914	4.7501	2.8862	2.8174	3.5986	3.7564
-0.04394	2.8465	3.2826	3.8914	4.7501	2.887	2.8174	3.5986	3.7564
-0.04389	2.8465	3.2765	3.8777	4.7485	2.8908	2.8273	3.5986	3.7641
-0.04384	2.8465	3.2597	3.87	4.7287	2.8984	2.8365	3.5971	3.7717
-0.04379	2.845	3.2407	3.8655	4.7028	2.8908	2.8403	3.5879	3.7885
-0.04374	2.8427	3.2361	3.8578	4.7012	2.8877	2.8411	3.5971	3.819
-0.043691	2.8381	3.233	3.8502	4.7012	2.8839	2.8426	3.5879	3.8358
-0.043641	2.8267	3.2285	3.8441	4.7012	2.8839	2.8472	3.5787	3.8419
-0.043591	2.8267	3.2246	3.8441	4.7134	2.8839	2.8479	3.5803	3.8419
-0.043541	2.8267	3.2254	3.8472	4.7272	2.8839	2.854	3.5772	3.8251
-0.043491	2.8267	3.2254	3.8487	4.7424	2.8862	2.8617	3.5681	3.8098
-0.043441	2.8114	3.2185	3.87	4.7424	2.8976	2.8647	3.5604	3.8098
-0.043392	2.7916	3.2079	3.8899	4.7424	2.8969	2.8624	3.5604	3.8098
-0.043342	2.7863	3.1995	3.896	4.7424	2.8999	2.8655	3.5604	3.8098
-0.043292	2.7863	3.2002	3.9097	4.7272	2.8969	2.8731	3.5497	3.8098
-0.043242	2.7863	3.1972	3.9006	4.7134	2.8961	2.8762	3.5391	3.8068
-0.043192	2.7863	3.1949	3.8853	4.7012	2.8976	2.8792	3.536	3.8022
-0.043143	2.7794	3.2048	3.8639	4.689	2.8976	2.8845	3.536	3.8022
-0.043093	2.7756	3.2033	3.8441	4.6768	2.8877	2.8929	3.536	3.8022
-0.043043	2.7626	3.2048	3.8288	4.6692	2.8763	2.8998	3.536	3.8022
-0.042993	2.7626	3.2048	3.8136	4.6707	2.8702	2.9166	3.536	3.8022
-0.042943	2.7519	3.2048	3.8014	4.6722	2.8831	2.9212	3.5253	3.7961
-0.042893	2.7519	3.2079	3.8014	4.686	2.887	2.9273	3.5253	3.7946
-0.042844	2.7473	3.2018	3.7922	4.7043	2.8831	2.9311	3.5253	3.7946
-0.042794	2.7428	3.1995	3.8029	4.718	2.8893	2.9341	3.5253	3.79
-0.042744	2.7397	3.2033	3.8105	4.7302	2.8946	2.9357	3.5253	3.79
-0.042694	2.7351	3.2048	3.8151	4.7363	2.8969	2.941	3.5253	3.79
-0.042644	2.7321	3.2048	3.8151	4.7379	2.8931	2.9471	3.5253	3.79
-0.042595	2.7283	3.2048	3.8197	4.7379	2.8969	2.9524	3.5467	3.79
-0.042545	2.726	3.2063	3.8197	4.7363	2.9022	2.9547	3.5452	3.7946
-0.042495	2.7237	3.2132	3.8197	4.7363	2.9037	2.9517	3.5314	3.7976
-0.042445	2.7176	3.217	3.8197	4.7302	2.9121	2.9486	3.5253	3.7976
-0.042395	2.713	3.2224	3.8273	4.7256	2.9175	2.9471	3.5208	3.7946
-0.042345	2.7092	3.2216	3.8487	4.7302	2.9243	2.9418	3.5269	3.7931
-0.042296	2.7092	3.2117	3.8487	4.7363	2.9282	2.9425	3.5269	3.7946
-0.042246	2.7092	3.201	3.8639	4.7379	2.9282	2.9441	3.5314	3.7946
-0.042196	2.7092	3.1918	3.867	4.7318	2.9282	2.9486	3.5314	3.7946
-0.042146	2.7092	3.1903	3.8731	4.7256	2.9427	2.9517	3.5314	3.7946
-0.042096	2.7092	3.185	3.9006	4.7318	2.9556	2.9547	3.5314	3.7915
-0.042047	2.7092	3.1857	3.9463	4.7379	2.9564	2.9586	3.5604	3.7839
-0.041997	2.7084	3.1743	3.9799	4.7409	2.9579	2.9639	3.5681	3.7793
-0.041947	2.7061	3.1689	3.9891	4.7409	2.9594	2.9669	3.562	3.7809
-0.041897	2.7084	3.1667	4.0043	4.7485	2.9633	2.9692	3.5513	3.7747
-0.041847	2.7054	3.159	4.0104	4.7562	2.9633	2.9738	3.5543	3.7747
-0.041797	2.6993	3.1468	4.0135	4.7607	2.9671	2.9738	3.5574	3.7747
-0.041748	2.6932	3.1468	4.0165	4.7516	2.9678	2.9692	3.5635	3.7747
-0.041698	2.6955	3.1438	4.0211	4.7424	2.9724	2.9677	3.5742	3.7809
-0.041648	2.6901	3.1438	4.0211	4.7333	2.9671	2.9753	3.5818	3.7809
-0.041598	2.6993	3.1468	4.0211	4.7226	2.964	2.9799	3.5574	3.7809
-0.041548	2.7061	3.1468	4.0257	4.7226	2.9617	2.9753	3.5497	3.787
-0.041499	2.7054	3.1445	4.0333	4.7226	2.9556	2.9776	3.5497	3.787
-0.041449	2.7077	3.1537	4.0425	4.7226	2.9556	2.9776	3.5497	3.787
-0.041399	2.7069	3.1567	4.0425	4.7226	2.9503	2.9814	3.5574	3.7931
-0.041349	2.7168	3.1636	4.0516	4.7226	2.948	2.9807	3.5543	3.7992
-0.041299	2.7222	3.1712	4.0776	4.7226	2.9396	2.9792	3.5543	3.7992
-0.041249	2.7229	3.1834	4.073	4.7333	2.9327	2.9792	3.5421	3.7992
-0.0412	2.7199	3.1972	4.0715	4.7333	2.935	2.9822	3.5406	3.8037
-0.04115	2.7168	3.2101	4.0699	4.7333	2.932	2.9837	3.5406	3.8037
-0.0411	2.7153	3.2132	4.0684	4.7333	2.9297	2.9845	3.5406	3.8037
-0.04105	2.7145	3.214	4.0669	4.7333	2.9297	2.9883	3.5314	3.8037
-0.041	2.7161	3.2155	4.0577	4.7333	2.932	3.0059	3.5223	3.8037
-0.040951	2.713	3.214	4.0577	4.7333	2.9312	3.0059	3.5223	3.8053
-0.040901	2.71	3.2254	4.0577	4.7333	2.9198	3.0059	3.5314	3.8114
-0.040851	2.713	3.2414	4.0425	4.7333	2.906	3.012	3.5406	3.8159
-0.040801	2.7161	3.2544	4.0425	4.7424	2.9022	3.0181	3.5406	3.8053
-0.040751	2.7153	3.2697	4.0348	4.7516	2.9053	3.0196	3.5406	3.8037
-0.040701	2.7145	3.2826	4.0303	4.7516	2.9053	3.0066	3.5436	3.8037
-0.040652	2.7084	3.2979	4.0242	4.776	2.906	3.0249	3.5452	3.7992
-0.040602	2.7122	3.307	4.0242	4.7958	2.9045	3.0371	3.5497	3.7992
-0.040552	2.7237	3.307	4.0303	4.8065	2.9022	3.0425	3.5559	3.7992
-0.040502	2.7275	3.307	4.0303	4.8233	2.9022	3.0425	3.5559	3.7946
-0.040452	2.7275	3.307	4.0242	4.834	2.9022	3.044	3.5559	3.7946
-0.040403	2.7489	3.3093	4.0242	4.8401	2.9022	3.0471	3.5497	3.7885
-0.040353	2.7618	3.3078	4.0211	4.8401	2.8969	3.0387	3.5497	3.7809
-0.040303	2.7573	3.307	4.0242	4.8477	2.8938	3.0341	3.5497	3.7763
-0.040253	2.7634	3.3101	4.0242	4.8477	2.8954	3.0295	3.5497	3.7717
-0.040203	2.7634	3.3177	4.0196	4.8294	2.8984	3.0326	3.5497	3.7763
-0.040153	2.7634	3.32	4.0196	4.8294	2.9022	3.0326	3.5559	3.7717
-0.040104	2.7618	3.3208	4.0181	4.8294	2.9045	3.0318	3.5589	3.7717
-0.040054	2.7649	3.3231	4.0181	4.8294	2.9114	3.0287	3.5589	3.7763
-0.040004	2.7649	3.3284	4.0181	4.8294	2.9114	3.0333	3.5589	3.7839
-0.039954	2.7672	3.3269	4.012	4.8294	2.9076	3.0364	3.5589	3.7839
-0.039904	2.7687	3.3253	4.0058	4.8294	2.9053	3.0364	3.5543	3.7885
-0.039855	2.7748	3.3238	4.0043	4.8294	2.9091	3.0417	3.5467	3.7946
-0.039805	2.7702	3.3299	4.0013	4.808	2.9053	3.0455	3.5467	3.7839
-0.039755	2.7702	3.3299	3.9982	4.808	2.9053	3.044	3.5543	3.7732
-0.039705	2.7702	3.3322	3.9891	4.808	2.8992	3.0486	3.5543	3.7839
-0.039655	2.7702	3.3353	3.9799	4.808	2.8938	3.0562	3.5467	3.7839
-0.039605	2.7702	3.3376	3.9799	4.808	2.8938	3.0684	3.5467	3.7839
-0.039556	2.7748	3.3437	3.9708	4.8019	2.8984	3.0722	3.5543	3.7763
-0.039506	2.8091	3.3444	3.9601	4.7852	2.9045	3.0745	3.565	3.7763
-0.039456	2.8168	3.3467	3.9463	4.7852	2.9045	3.0768	3.565	3.7732
-0.039406	2.8221	3.3475	3.9341	4.7852	2.9144	3.0768	3.565	3.7732
-0.039356	2.8343	3.3498	3.9204	4.7852	2.9144	3.0745	3.5543	3.7763
-0.039307	2.8427	3.3513	3.9051	4.7852	2.9205	3.0722	3.5467	3.7793
-0.039257	2.845	3.3513	3.8975	4.7745	2.9236	3.0745	3.5452	3.7809
-0.039207	2.8511	3.3513	3.8975	4.7699	2.9259	3.0776	3.5543	3.7809
-0.039157	2.8572	3.3566	3.8975	4.7638	2.9305	3.0875	3.565	3.7839
-0.039107	2.8633	3.3658	3.8975	4.7562	2.9312	3.0913	3.5757	3.7885
-0.039057	2.8748	3.3727	3.8639	4.7516	2.9366	3.0997	3.5833	3.7885
-0.039008	2.8862	3.3734	3.8105	4.7424	2.9366	3.1073	3.5848	3.7885
-0.038958	2.8908	3.3757	3.777	4.7348	2.9366	3.1073	3.5848	3.7885
-0.038908	2.8908	3.3788	3.7632	4.7272	2.9381	3.102	3.5757	3.7885
-0.038858	2.8908	3.3818	3.7449	4.7195	2.9381	3.1027	3.5696	3.7885
-0.038808	2.8969	3.3772	3.722	4.7195	2.9396	3.102	3.5696	3.7961
-0.038759	2.9045	3.3826	3.7129	4.7195	2.9396	3.0997	3.565	3.7992
-0.038709	2.9129	3.3826	3.6961	4.7195	2.9343	3.0936	3.565	3.7992
-0.038659	2.919	3.3826	3.693	4.7195	2.9411	3.0944	3.5696	3.8053
-0.038609	2.9243	3.3864	3.7007	4.7195	2.9388	3.0944	3.5757	3.8053
-0.038559	2.9274	3.3864	3.7007	4.7119	2.9282	3.102	3.5757	3.8053
-0.038509	2.9312	3.3871	3.7007	4.7043	2.9228	3.102	3.5818	3.8129
-0.03846	2.935	3.3932	3.7022	4.7043	2.9198	3.1066	3.5894	3.8144
-0.03841	2.9503	3.3955	3.7022	4.6875	2.9182	3.0989	3.5986	3.8144
-0.03836	2.9724	3.3986	3.7022	4.6661	2.916	3.0875	3.6032	3.8144
-0.03831	2.9831	3.407	3.7022	4.6539	2.916	3.0722	3.6093	3.822
-0.03826	2.9877	3.4131	3.7068	4.6463	2.916	3.0753	3.6093	3.8297
-0.038211	2.99	3.4146	3.7144	4.6463	2.9129	3.0768	3.6093	3.8343
-0.038161	2.9861	3.4177	3.7205	4.6387	2.9076	3.0852	3.6032	3.8343
-0.038111	2.9922	3.4192	3.7236	4.6387	2.903	3.0921	3.5925	3.8297
-0.038061	2.9961	3.4283	3.7251	4.6265	2.9015	3.0936	3.5879	3.8266
-0.038011	2.9999	3.439	3.7251	4.6204	2.8961	3.0944	3.594	3.8266
-0.037961	3.0037	3.4497	3.7251	4.6158	2.8831	3.0959	3.6001	3.8266
-0.037912	3.0144	3.4665	3.7251	4.6082	2.874	3.0913	3.6001	3.822
-0.037862	3.0174	3.4764	3.7251	4.6021	2.8763	3.0852	3.6001	3.822
-0.037812	3.0174	3.4894	3.7236	4.6005	2.8763	3.0776	3.6138	3.822
-0.037762	3.0174	3.5054	3.7236	4.6005	2.8809	3.0776	3.6321	3.8266
-0.037712	3.0228	3.5214	3.7251	4.6005	2.8847	3.0776	3.6352	3.822
-0.037663	3.0296	3.5374	3.7251	4.6005	2.8931	3.0829	3.6367	3.8266
-0.037613	3.0342	3.5466	3.7251	4.6021	2.8992	3.089	3.6321	3.8297
-0.037563	3.0388	3.5504	3.7266	4.6021	2.9022	3.089	3.6321	3.8297
-0.037513	3.0502	3.5382	3.7266	4.6005	2.903	3.089	3.6321	3.8297
-0.037463	3.064	3.5344	3.7266	4.6005	2.9129	3.0921	3.6321	3.8297
-0.037413	3.0663	3.5291	3.7266	4.6005	2.9205	3.0928	3.6321	3.8297
-0.037364	3.0807	3.5268	3.7266	4.6005	2.9221	3.0928	3.6321	3.8297
-0.037314	3.0914	3.5275	3.7251	4.6005	2.9221	3.0944	3.6321	3.8297
-0.037264	3.093	3.526	3.7251	4.6005	2.9221	3.0997	3.6321	3.8297
-0.037214	3.0937	3.526	3.7251	4.6005	2.9213	3.1073	3.6321	3.8327
-0.037164	3.0914	3.5313	3.7251	4.6005	2.9205	3.1058	3.6321	3.8343
-0.037115	3.0869	3.5352	3.7251	4.6005	2.9205	3.1058	3.6321	3.8343
-0.037065	3.0792	3.5489	3.7266	4.6005	2.9205	3.1096	3.6321	3.8343
-0.037015	3.0701	3.5535	3.7266	4.6005	2.9205	3.1104	3.6321	3.8373
-0.036965	3.0617	3.555	3.7251	4.6005	2.9228	3.1134	3.6321	3.8419
-0.036915	3.0609	3.5489	3.7251	4.6005	2.9198	3.1157	3.6321	3.8419
-0.036865	3.0602	3.5603	3.7251	4.6005	2.9167	3.118	3.6215	3.8419
-0.036816	3.0579	3.5794	3.7251	4.6005	2.9099	3.118	3.623	3.8419
-0.036766	3.0556	3.5878	3.7251	4.6005	2.9076	3.118	3.6093	3.848
-0.036716	3.0548	3.5924	3.722	4.6005	2.9007	3.118	3.6093	3.8358
-0.036666	3.0563	3.5863	3.7175	4.6005	2.8992	3.1157	3.6138	3.8343
-0.036616	3.0602	3.5794	3.7083	4.6005	2.8961	3.1127	3.6138	3.8282
-0.036567	3.0624	3.5725	3.7007	4.6021	2.8976	3.1142	3.6138	3.8343
-0.036517	3.0624	3.5672	3.7007	4.6021	2.8992	3.1188	3.6276	3.8343
-0.036467	3.0624	3.5649	3.693	4.6082	2.8961	3.1226	3.6276	3.8343
-0.036417	3.0624	3.5687	3.693	4.6127	2.8908	3.1256	3.6138	3.8282
-0.036367	3.0342	3.5741	3.693	4.6249	2.8854	3.1256	3.6016	3.8236
-0.036317	3.0327	3.5641	3.6854	4.6402	2.8778	3.1272	3.594	3.8236
-0.036268	3.0304	3.5657	3.6854	4.66	2.8725	3.1272	3.594	3.819
-0.036218	2.9999	3.5641	3.693	4.6707	2.8656	3.1272	3.5803	3.8129
-0.036168	2.9976	3.5519	3.7007	4.689	2.8648	3.1272	3.5803	3.8053
-0.036118	2.9968	3.5519	3.693	4.7073	2.8648	3.1256	3.5803	3.7992
-0.036068	2.9961	3.5504	3.7037	4.7211	2.8671	3.1211	3.5665	3.7946
-0.036019	2.9869	3.5474	3.7114	4.7379	2.8633	3.1226	3.5635	3.79
-0.035969	2.9755	3.5397	3.7114	4.7546	2.8564	3.1165	3.5665	3.7809
-0.035919	2.9701	3.5367	3.7114	4.776	2.8564	3.1127	3.5787	3.7809
-0.035869	2.9663	3.5321	3.7037	4.7943	2.8519	3.1127	3.5803	3.7809
-0.035819	2.9587	3.5321	3.7037	4.7989	2.8473	3.1073	3.565	3.7809
-0.035769	2.9556	3.5352	3.7037	4.8111	2.8404	3.1005	3.5528	3.7809
-0.03572	2.9572	3.5443	3.693	4.8248	2.8389	3.1035	3.5269	3.7824
-0.03567	2.9572	3.5489	3.6976	4.8248	2.8374	3.1027	3.5024	3.7732
-0.03562	2.9572	3.5435	3.7144	4.8294	2.8404	3.102	3.4948	3.7824
-0.03557	2.9572	3.5397	3.7251	4.8355	2.8503	3.0997	3.4826	3.7824
-0.03552	2.9556	3.5359	3.7251	4.837	2.8427	3.102	3.4826	3.7824
-0.035471	2.9472	3.5321	3.7144	4.837	2.8404	3.0997	3.4796	3.7824
-0.035421	2.9381	3.5321	3.7144	4.837	2.8404	3.0997	3.4796	3.7915
-0.035371	2.935	3.5321	3.7175	4.8416	2.8419	3.0913	3.4796	3.7931
-0.035321	2.9312	3.5306	3.7251	4.8492	2.8427	3.0921	3.4796	3.7931
-0.035271	2.9266	3.5298	3.7358	4.8569	2.8404	3.0921	3.4796	3.7931
-0.035221	2.9221	3.5291	3.7434	4.8492	2.8404	3.0921	3.4796	3.7931
-0.035172	2.9144	3.5329	3.7526	4.8569	2.8358	3.0898	3.4796	3.7946
-0.035122	2.9175	3.5344	3.7709	4.8569	2.8343	3.0837	3.4796	3.7946
-0.035072	2.9213	3.5359	3.7968	4.8569	2.8252	3.0791	3.4796	3.8007
-0.035022	2.9243	3.5413	3.8182	4.8569	2.8252	3.0745	3.4796	3.8037
-0.034972	2.9259	3.5474	3.8182	4.8447	2.8152	3.0699	3.4658	3.8037
-0.034923	2.9282	3.5497	3.8182	4.834	2.8084	3.0684	3.4612	3.8037
-0.034873	2.9297	3.5458	3.8319	4.8309	2.7954	3.0722	3.4612	3.8037
-0.034823	2.935	3.5481	3.8319	4.8248	2.7924	3.0669	3.4612	3.8144
-0.034773	2.9373	3.5512	3.8319	4.8309	2.7954	3.06	3.4612	3.8144
-0.034723	2.9373	3.5573	3.8319	4.834	2.7962	3.0577	3.4612	3.8144
-0.034673	2.9373	3.5573	3.8319	4.8386	2.8008	3.06	3.4612	3.8144
-0.034624	2.9419	3.5611	3.8319	4.8569	2.8	3.0722	3.4612	3.8144
-0.034574	2.9419	3.5611	3.8319	4.8645	2.8015	3.0722	3.4612	3.8144
-0.034524	2.9404	3.5626	3.8441	4.8676	2.8076	3.0707	3.4612	3.8144
-0.034474	2.9419	3.5672	3.8441	4.8676	2.8076	3.0707	3.4612	3.8083
-0.034424	2.9465	3.5672	3.8441	4.8828	2.7985	3.0692	3.4689	3.8083
-0.034375	2.9495	3.5672	3.8319	4.8996	2.7931	3.0707	3.475	3.8083
-0.034325	2.9541	3.5725	3.8319	4.8996	2.7939	3.0715	3.4826	3.79
-0.034275	2.9572	3.5764	3.8319	4.9179	2.7954	3.073	3.4826	3.7778
-0.034225	2.961	3.5809	3.8319	4.95	2.7924	3.073	3.4826	3.7778
-0.034175	2.9579	3.5893	3.8319	4.9713	2.7969	3.0699	3.4979	3.7778
-0.034125	2.9579	3.5931	3.8319	4.9774	2.8015	3.0669	3.5055	3.7671
-0.034076	2.961	3.5947	3.8319	4.9713	2.8015	3.0669	3.5055	3.7641
-0.034026	2.9709	3.5962	3.8319	4.9652	2.7992	3.0661	3.5162	3.7641
-0.033976	2.9793	3.5909	3.8166	4.9576	2.8	3.0623	3.5284	3.7488
-0.033926	2.9839	3.5863	3.8014	4.9438	2.8015	3.0585	3.5314	3.7351
-0.033876	2.9854	3.5809	3.7907	4.9301	2.8015	3.0608	3.5589	3.7244
-0.033827	2.9854	3.5764	3.7846	4.9179	2.8008	3.0608	3.5818	3.7351
-0.033777	2.9892	3.5695	3.7785	4.9179	2.8038	3.0646	3.5787	3.7488
-0.033727	2.99	3.5657	3.7617	4.9118	2.8107	3.0646	3.5772	3.7641
-0.033677	2.9877	3.5672	3.748	4.9103	2.8107	3.0646	3.5772	3.7641
-0.033627	2.9938	3.5672	3.7419	4.9103	2.8107	3.0692	3.5726	3.7641
-0.033577	3.0014	3.5657	3.7281	4.9057	2.8038	3.0738	3.5726	3.7641
-0.033528	3.0098	3.5641	3.7098	4.8935	2.7985	3.0722	3.5772	3.7854
-0.033478	3.0151	3.5641	3.7236	4.8737	2.8107	3.0692	3.5726	3.7976
-0.033428	3.0197	3.5664	3.7236	4.8599	2.8236	3.0692	3.5665	3.8053
-0.033378	3.0151	3.5718	3.7236	4.8492	2.8343	3.0707	3.5665	3.8129
-0.033328	3.0106	3.5725	3.7236	4.8492	2.8419	3.0722	3.5726	3.8068
-0.033279	3.022	3.5695	3.7236	4.8386	2.8252	3.0776	3.5726	3.8068
-0.033229	3.0121	3.5641	3.7236	4.834	2.8252	3.0806	3.5711	3.8068
-0.033179	2.9915	3.5573	3.7403	4.8248	2.8252	3.0829	3.5711	3.8068
-0.033129	2.9839	3.5527	3.7403	4.8172	2.8214	3.0821	3.5711	3.8068
-0.033079	2.9793	3.5573	3.7403	4.8172	2.8267	3.0799	3.5711	3.8098
-0.033029	2.9724	3.5657	3.7403	4.8248	2.8297	3.0799	3.5711	3.7976
-0.03298	2.9694	3.5741	3.7403	4.8248	2.8244	3.0776	3.5665	3.7961
-0.03293	2.9678	3.5764	3.748	4.8172	2.8152	3.0829	3.5711	3.7931
-0.03288	2.9678	3.5794	3.751	4.8141	2.8122	3.1035	3.5742	3.7854
-0.03283	2.9678	3.5863	3.7526	4.8035	2.8122	3.1188	3.5772	3.7793
-0.03278	2.964	3.5977	3.7617	4.7943	2.8122	3.1256	3.5787	3.7793
-0.032731	2.9602	3.5977	3.7617	4.7897	2.8137	3.1356	3.5833	3.7717
-0.032681	2.9579	3.5977	3.7617	4.7775	2.8137	3.1439	3.5833	3.7641
-0.032631	2.9556	3.6107	3.7617	4.7653	2.8122	3.1531	3.5879	3.7641
-0.032581	2.9564	3.6183	3.7617	4.7577	2.8183	3.1539	3.5971	3.7625
-0.032531	2.9617	3.6198	3.7617	4.7775	2.8145	3.1539	3.5971	3.7625
-0.032481	2.9564	3.6145	3.7617	4.7897	2.8175	3.1539	3.5894	3.7625
-0.032432	2.9495	3.6107	3.7617	4.7943	2.8313	3.1531	3.5894	3.7625
-0.032382	2.9465	3.6122	3.7617	4.7943	2.8313	3.1508	3.5971	3.7625
-0.032332	2.9388	3.6122	3.7617	4.7943	2.8343	3.1493	3.6169	3.758
-0.032282	2.9343	3.6237	3.7617	4.8004	2.8427	3.1455	3.6169	3.7488
-0.032232	2.9335	3.6259	3.7693	4.8096	2.8519	3.1417	3.626	3.729
-0.032183	2.9312	3.6305	3.7693	4.8126	2.8496	3.1424	3.626	3.703
-0.032133	2.9213	3.6382	3.7693	4.8157	2.8526	3.134	3.623	3.703
-0.032083	2.9144	3.6382	3.7693	4.8172	2.8595	3.1325	3.6138	3.703
-0.032033	2.9129	3.6397	3.7831	4.8187	2.8664	3.131	3.6138	3.703
-0.031983	2.9053	3.6427	3.806	4.8264	2.8709	3.1279	3.6138	3.703
-0.031933	2.8992	3.6511	3.8121	4.8187	2.8625	3.1249	3.6062	3.703
-0.031884	2.89	3.6671	3.8212	4.8187	2.8603	3.1249	3.6047	3.703
-0.031834	2.8725	3.6809	3.8319	4.8187	2.8534	3.1272	3.5986	3.703
-0.031784	2.8595	3.6748	3.8365	4.8187	2.8458	3.1302	3.5925	3.703
-0.031734	2.8549	3.6687	3.8456	4.8187	2.8481	3.1302	3.5879	3.703
-0.031684	2.8465	3.6732	3.8594	4.8248	2.8526	3.1287	3.5879	3.7152
-0.031635	2.8381	3.6771	3.8655	4.8248	2.861	3.1287	3.5879	3.7259
-0.031585	2.832	3.6794	3.8731	4.8248	2.8641	3.1287	3.5879	3.7335
-0.031535	2.8259	3.6794	3.8868	4.8172	2.8664	3.1287	3.5879	3.7335
-0.031485	2.8168	3.6771	3.9097	4.8141	2.8671	3.1203	3.5879	3.7381
-0.031435	2.8107	3.671	3.9326	4.8141	2.8671	3.1134	3.5894	3.7488
-0.031385	2.8069	3.6671	3.9494	4.8141	2.8656	3.1111	3.5894	3.7488
-0.031336	2.8046	3.6664	3.9509	4.8172	2.8656	3.1111	3.5894	3.7381
-0.031286	2.7931	3.6664	3.9585	4.8172	2.8633	3.1073	3.5894	3.7381
-0.031236	2.7824	3.6649	3.9646	4.8172	2.8625	3.1027	3.5894	3.7381
-0.031186	2.7824	3.6679	3.9814	4.8248	2.858	3.0959	3.5925	3.7488
-0.031136	2.7824	3.6725	3.9982	4.8248	2.8595	3.089	3.5971	3.761
-0.031087	2.7733	3.6839	4.0058	4.8447	2.8656	3.0783	3.6032	3.7763
-0.031037	2.7641	3.6794	4.015	4.8492	2.8694	3.0806	3.6032	3.7885
-0.030987	2.7534	3.6748	4.0226	4.8508	2.8694	3.0905	3.6032	3.8098
-0.030937	2.7473	3.6755	4.0303	4.8523	2.8709	3.1005	3.6001	3.8098
-0.030887	2.7451	3.6717	4.0379	4.8523	2.8725	3.1043	3.594	3.8098
-0.030837	2.742	3.6649	4.0394	4.8523	2.8725	3.1089	3.594	3.822
-0.030788	2.742	3.6679	4.0486	4.8523	2.8725	3.1195	3.5711	3.822
-0.030738	2.7412	3.671	4.0562	4.8523	2.8709	3.1302	3.5497	3.8159
-0.030688	2.7374	3.6664	4.0654	4.8523	2.8763	3.1279	3.5497	3.8159
-0.030638	2.7321	3.6618	4.0776	4.8523	2.8862	3.1333	3.5513	3.8159
-0.030588	2.7267	3.6565	4.0898	4.8523	2.8931	3.1516	3.5513	3.8159
-0.030539	2.7275	3.6519	4.0974	4.8523	2.8931	3.163	3.5452	3.8159
-0.030489	2.7298	3.6504	4.0913	4.8553	2.8946	3.1691	3.5452	3.822
-0.030439	2.7298	3.642	4.0821	4.8553	2.8923	3.179	3.5452	3.8312
-0.030389	2.7451	3.6427	4.0715	4.8553	2.8893	3.1905	3.536	3.8312
-0.030339	2.7565	3.6389	4.0715	4.8553	2.8839	3.2012	3.5299	3.8312
-0.030289	2.7596	3.632	4.0745	4.8553	2.8755	3.2012	3.536	3.8358
-0.03024	2.7618	3.629	4.0913	4.8553	2.8755	3.2096	3.5391	3.8358
-0.03019	2.7672	3.6412	4.1096	4.8553	2.8755	3.2164	3.5314	3.8358
-0.03014	2.7748	3.6626	4.1096	4.8553	2.887	3.2195	3.5238	3.8724
-0.03009	2.774	3.6725	4.1005	4.8737	2.8976	3.2195	3.5147	3.9106
-0.03004	2.7702	3.6931	4.0821	4.8553	2.9053	3.2195	3.5177	3.9136
-0.029991	2.7687	3.7076	4.0699	4.8523	2.9053	3.218	3.5314	3.9136
-0.029941	2.7672	3.716	4.0684	4.8508	2.9053	3.2164	3.536	3.9167
-0.029891	2.7664	3.7305	4.0684	4.8523	2.8992	3.2164	3.5513	3.9136
-0.029841	2.7649	3.745	4.0516	4.8508	2.9068	3.2118	3.5589	3.9136
-0.029791	2.7702	3.7518	4.0303	4.8508	2.916	3.2073	3.5513	3.9136
-0.029741	2.7702	3.7595	4.0226	4.8508	2.9144	3.2065	3.5452	3.9106
-0.029692	2.7618	3.774	4.0211	4.8462	2.9137	3.2065	3.5452	3.9106
-0.029642	2.7527	3.7816	4.0165	4.8462	2.9083	3.2065	3.5543	3.9106
-0.029592	2.7519	3.7823	4.012	4.8462	2.9037	3.2019	3.5543	3.9136
-0.029542	2.7481	3.7816	4.012	4.8462	2.9007	3.2057	3.565	3.9136
-0.029492	2.7443	3.7808	4.012	4.8462	2.8976	3.218	3.565	3.9136
-0.029443	2.739	3.7808	4.012	4.8462	2.8923	3.2126	3.5742	3.909
-0.029393	2.7313	3.7846	4.012	4.8462	2.8923	3.1912	3.5742	3.8968
-0.029343	2.713	3.7923	4.012	4.8462	2.8923	3.1737	3.5833	3.8968
-0.029293	2.7039	3.7976	4.0165	4.8462	2.8961	3.1653	3.5879	3.9151
-0.029243	2.7222	3.7976	4.0211	4.8462	2.8908	3.1737	3.5879	3.938
-0.029193	2.7298	3.7961	4.0211	4.8462	2.8801	3.1752	3.5909	3.9517
-0.029144	2.7359	3.7946	4.0165	4.8508	2.8786	3.1737	3.6016	3.9594
-0.029094	2.726	3.7885	4.012	4.8553	2.874	3.1836	3.6108	3.9594
-0.029044	2.7275	3.7785	4.012	4.8599	2.874	3.1874	3.6108	3.9594
-0.028994	2.739	3.7717	4.012	4.8676	2.8687	3.1897	3.6016	3.9533
-0.028944	2.7626	3.7755	4.012	4.8813	2.8709	3.1928	3.6108	3.9533
-0.028895	2.7924	3.7755	4.012	4.8721	2.8709	3.2004	3.6169	3.9517
-0.028845	2.8122	3.7648	4.012	4.8553	2.8709	3.2088	3.6215	3.9365
-0.028795	2.8259	3.7526	4.0089	4.8615	2.8717	3.2118	3.6276	3.9517
-0.028745	2.8412	3.7465	4.0089	4.863	2.8725	3.2172	3.6352	3.9594
-0.028695	2.8526	3.7328	4.0089	4.863	2.8725	3.2256	3.6352	3.9609
-0.028645	2.8603	3.7282	4.0043	4.8721	2.8671	3.2332	3.6352	3.9609
-0.028596	2.8702	3.7206	4.0043	4.8721	2.8671	3.2271	3.6352	3.9609
-0.028546	2.8709	3.7206	4.0043	4.8859	2.8641	3.2149	3.6352	3.9609
-0.028496	2.874	3.719	4.0043	4.895	2.8618	3.2134	3.6337	3.9609
-0.028446	2.8786	3.7144	4.0043	4.9011	2.8648	3.2118	3.6321	3.9624
-0.028396	2.8786	3.7114	4.0043	4.9164	2.8595	3.2134	3.6276	3.9624
-0.028347	2.8831	3.7259	4.0043	4.9164	2.858	3.2164	3.626	3.9624
-0.028297	2.8809	3.7465	4.0089	4.9332	2.8549	3.2134	3.6215	3.9609
-0.028247	2.8809	3.7663	4.012	4.9332	2.8549	3.2118	3.6199	3.9609
-0.028197	2.8809	3.7785	4.0211	4.9332	2.8549	3.218	3.6062	3.9609
-0.028147	2.874	3.7862	4.0379	4.9332	2.8549	3.2118	3.6062	3.9624
-0.028097	2.8725	3.7808	4.047	4.9438	2.858	3.2096	3.594	3.9624
-0.028048	2.8679	3.7854	4.0699	4.95	2.8595	3.2103	3.5879	3.9624
-0.027998	2.8641	3.7907	4.0882	4.95	2.8656	3.2134	3.5757	3.9609
-0.027948	2.861	3.7869	4.0898	4.95	2.8755	3.2172	3.5665	3.9655
-0.027898	2.8587	3.793	4.0913	4.95	2.8885	3.221	3.5665	3.9426
-0.027848	2.8542	3.8113	4.0913	4.95	2.9007	3.2241	3.5742	3.9197
-0.027799	2.8542	3.8197	4.0913	4.95	2.8976	3.2302	3.5742	3.9197
-0.027749	2.8542	3.8235	4.1127	4.95	2.8976	3.2233	3.5833	3.9197
-0.027699	2.8496	3.8258	4.1233	4.95	2.8999	3.2233	3.5909	3.9151
-0.027649	2.8458	3.8297	4.1325	4.9438	2.8976	3.2233	3.6077	3.9151
-0.027599	2.8389	3.8342	4.1432	4.9438	2.8954	3.2263	3.6077	3.9197
-0.027549	2.8351	3.8449	4.1584	4.9332	2.8976	3.2302	3.623	3.9426
-0.0275	2.8259	3.851	4.1584	4.9332	2.8908	3.237	3.6276	3.9426
-0.02745	2.8259	3.8495	4.1584	4.9332	2.8824	3.2363	3.6352	3.9197
-0.0274	2.8267	3.851	4.1584	4.9316	2.8755	3.2355	3.6428	3.9197
-0.02735	2.829	3.8525	4.1584	4.9316	2.8732	3.2286	3.6459	3.9151
-0.0273	2.829	3.8525	4.1584	4.9423	2.8687	3.2431	3.6474	3.9136
-0.027251	2.8313	3.8571	4.1584	4.9316	2.8603	3.2492	3.6596	3.9136
-0.027201	2.829	3.8693	4.1737	4.9316	2.8587	3.2508	3.6627	3.9151
-0.027151	2.8282	3.88	4.1767	4.9225	2.8587	3.2561	3.6627	3.9304
-0.027101	2.8259	3.8838	4.1767	4.9149	2.8587	3.2622	3.6627	3.9289
-0.027051	2.8229	3.8907	4.1767	4.9072	2.8625	3.2767	3.655	3.9289
-0.027001	2.8214	3.8991	4.1767	4.8981	2.8625	3.2843	3.6413	3.9273
-0.026952	2.8267	3.9059	4.1829	4.9072	2.861	3.2851	3.6306	3.9273
-0.026902	2.832	3.9075	4.1951	4.9103	2.8564	3.2874	3.6276	3.9136
-0.026852	2.8419	3.912	4.2027	4.9103	2.8542	3.2889	3.6154	3.9044
-0.026802	2.8519	3.9189	4.2027	4.9103	2.8526	3.2889	3.594	3.8983
-0.026752	2.8511	3.9182	4.1951	4.9103	2.8481	3.2805	3.5803	3.8861
-0.026703	2.8503	3.9212	4.1829	4.9103	2.8435	3.2752	3.5757	3.8785
-0.026653	2.8572	3.9182	4.1829	4.9103	2.8427	3.2698	3.562	3.8678
-0.026603	2.8831	3.9136	4.1829	4.9103	2.8526	3.2622	3.5482	3.8632
-0.026553	2.9106	3.9029	4.1767	4.9103	2.8595	3.2553	3.5452	3.8587
-0.026503	2.9144	3.9029	4.1737	4.8981	2.8595	3.2462	3.5391	3.8587
-0.026453	2.9213	3.9052	4.1584	4.8843	2.858	3.2317	3.5345	3.8526
-0.026404	2.9274	3.909	4.1584	4.8752	2.8564	3.2218	3.5314	3.8526
-0.026354	2.9396	3.9098	4.1584	4.8645	2.8557	3.218	3.5177	3.848
-0.026304	2.9518	3.9113	4.1584	4.8676	2.8564	3.2157	3.5009	3.8449
-0.026254	2.9617	3.9105	4.1584	4.8782	2.8564	3.2019	3.4933	3.8358
-0.026204	2.9533	3.9059	4.1584	4.8874	2.8534	3.1989	3.4872	3.819
-0.026155	2.9396	3.8968	4.1584	4.9042	2.8564	3.192	3.4826	3.8129
-0.026105	2.9312	3.9044	4.1432	4.8981	2.8572	3.1874	3.4826	3.8144
-0.026055	2.9312	3.909	4.1355	4.8981	2.8572	3.1829	3.4796	3.8205
-0.026005	2.919	3.9113	4.1127	4.8981	2.8572	3.1768	3.4811	3.8144
-0.025955	2.9099	3.9059	4.0852	4.8981	2.8664	3.1706	3.4811	3.8175
-0.025905	2.9076	3.8968	4.0684	4.9103	2.8717	3.1653	3.4811	3.8373
-0.025856	2.9022	3.8953	4.0669	4.9225	2.8702	3.1592	3.4811	3.8373
-0.025806	2.8847	3.8945	4.0532	4.9606	2.8671	3.1592	3.4811	3.8312
-0.025756	2.8618	3.8907	4.0486	5.0079	2.8694	3.1546	3.4811	3.8312
-0.025706	2.8679	3.8907	4.0379	5.0003	2.8702	3.15	3.4811	3.8312
-0.025656	2.8549	3.8892	4.0272	4.9957	2.8671	3.1478	3.4811	3.8343
-0.025607	2.8313	3.8716	4.012	4.9866	2.8595	3.1478	3.504	3.8343
-0.025557	2.8084	3.8609	3.9952	4.9774	2.858	3.1539	3.5208	3.8343
-0.025507	2.7992	3.8541	3.9952	4.9774	2.8572	3.1584	3.5299	3.8373
-0.025457	2.7885	3.8533	3.9906	4.9774	2.8549	3.16	3.5345	3.8373
-0.025407	2.7779	3.8602	3.9692	4.9774	2.8542	3.1661	3.536	3.8404
-0.025357	2.7931	3.8625	3.9662	4.9667	2.8503	3.1714	3.5436	3.8419
-0.025308	2.7954	3.8647	3.957	4.9591	2.8481	3.1706	3.5436	3.8419
-0.025258	2.7954	3.8663	3.9616	4.95	2.8458	3.1684	3.5513	3.8419
-0.025208	2.7946	3.8716	3.9646	4.9377	2.8404	3.163	3.565	3.8419
-0.025158	2.7878	3.8663	3.9677	4.9332	2.832	3.147	3.5787	3.8404
-0.025108	2.7946	3.8762	3.9662	4.9088	2.8229	3.1295	3.565	3.8373
-0.025059	2.7946	3.8724	3.9662	4.8569	2.8214	3.1226	3.5513	3.8373
-0.025009	2.7847	3.8762	3.9662	4.8492	2.8214	3.1218	3.5559	3.8404
-0.024959	2.7901	3.8815	3.9509	4.8492	2.8336	3.1218	3.565	3.8465
-0.024909	2.7855	3.8762	3.9357	4.837	2.845	3.1226	3.5696	3.8541
-0.024859	2.771	3.8731	3.9235	4.8309	2.8427	3.1233	3.5787	3.8541
-0.024809	2.774	3.88	3.9128	4.8294	2.8336	3.1211	3.5879	3.8541
-0.02476	2.7817	3.8724	3.9097	4.8294	2.8358	3.1188	3.5879	3.8571
-0.02471	2.7855	3.8609	3.896	4.8294	2.8419	3.1226	3.5879	3.8571
-0.02466	2.7847	3.8472	3.896	4.8294	2.8542	3.1264	3.5955	3.8541
-0.02461	2.787	3.8472	3.896	4.834	2.8503	3.1279	3.5955	3.8465
-0.02456	2.7924	3.8419	3.896	4.8126	2.8381	3.1378	3.5925	3.8404
-0.024511	2.8015	3.8403	3.8823	4.7974	2.8328	3.147	3.5848	3.8404
-0.024461	2.8061	3.8335	3.8884	4.7852	2.8389	3.1478	3.5848	3.8404
-0.024411	2.8084	3.8289	3.8945	4.7897	2.8442	3.1523	3.5848	3.8449
-0.024361	2.8107	3.8335	3.899	4.7821	2.8381	3.1592	3.5772	3.8526
-0.024311	2.8084	3.8365	3.899	4.7821	2.8397	3.1653	3.5757	3.8571
-0.024261	2.8046	3.8403	3.899	4.7852	2.8328	3.1684	3.5681	3.8571
-0.024212	2.8008	3.8426	3.9067	4.7897	2.8236	3.1638	3.5681	3.8617
-0.024162	2.7977	3.8396	3.9128	4.7958	2.8191	3.16	3.5681	3.8648
-0.024112	2.7931	3.8396	3.9143	4.8019	2.8145	3.1676	3.5513	3.8648
-0.024062	2.7885	3.8373	3.9235	4.8035	2.8084	3.1638	3.5421	3.8648
-0.024012	2.787	3.835	3.9235	4.805	2.803	3.1562	3.5406	3.8617
-0.023963	2.7809	3.835	3.9235	4.805	2.8076	3.1508	3.5497	3.8617
-0.023913	2.7786	3.8373	3.9235	4.8096	2.8114	3.1508	3.5559	3.8617
-0.023863	2.7832	3.8396	3.9402	4.8248	2.8114	3.1478	3.5559	3.8541
-0.023813	2.7832	3.8388	3.9509	4.8492	2.8023	3.1462	3.5559	3.8541
-0.023763	2.7832	3.8281	3.9524	4.8508	2.7969	3.1462	3.5559	3.8541
-0.023713	2.7832	3.8251	3.957	4.8508	2.7969	3.1424	3.5497	3.8541
-0.023664	2.784	3.8182	3.9662	4.8416	2.7885	3.1363	3.5497	3.8663
-0.023614	2.7832	3.8136	3.9799	4.837	2.7885	3.1363	3.5497	3.8831
-0.023564	2.7779	3.8136	3.9845	4.837	2.7878	3.1325	3.5559	3.8861
-0.023514	2.7763	3.819	3.9845	4.834	2.7916	3.1302	3.5497	3.8739
-0.023464	2.774	3.8235	3.9921	4.8325	2.7931	3.1348	3.5497	3.8709
-0.023415	2.7817	3.819	4.0074	4.8294	2.7969	3.134	3.5497	3.8739
-0.023365	2.7733	3.819	4.0135	4.8248	2.7977	3.134	3.5406	3.8938
-0.023315	2.7679	3.8152	4.0242	4.8248	2.8008	3.134	3.533	3.8938
-0.023265	2.7626	3.8091	4.0348	4.8248	2.8091	3.134	3.533	3.8953
-0.023215	2.7489	3.8052	4.0348	4.8248	2.8175	3.1378	3.533	3.8999
-0.023165	2.7199	3.7976	4.0348	4.8248	2.8069	3.1401	3.5299	3.9014
-0.023116	2.7306	3.7885	4.0409	4.8279	2.7946	3.1378	3.5299	3.9044
-0.023066	2.7351	3.7785	4.0455	4.8279	2.787	3.1378	3.5299	3.906
-0.023016	2.7306	3.7648	4.0455	4.8279	2.7847	3.1348	3.5299	3.909
-0.022966	2.726	3.7587	4.0455	4.8248	2.7824	3.1279	3.5299	3.9136
-0.022916	2.7237	3.7389	4.0455	4.8248	2.7878	3.1264	3.5299	3.9151
-0.022867	2.7275	3.7335	4.0455	4.8248	2.7832	3.1172	3.533	3.9151
-0.022817	2.7306	3.732	4.0333	4.8248	2.7832	3.1073	3.5299	3.9029
-0.022767	2.7306	3.7282	4.0211	4.837	2.7878	3.1058	3.5253	3.8953
-0.022717	2.739	3.7244	4.012	4.837	2.7878	3.1035	3.5284	3.8953
-0.022667	2.7428	3.716	3.9997	4.8248	2.7786	3.105	3.5253	3.8953
-0.022617	2.7428	3.7061	3.9845	4.8172	2.7832	3.1081	3.5253	3.9014
-0.022568	2.7428	3.703	3.9646	4.8172	2.7763	3.1104	3.5253	3.9075
-0.022518	2.7428	3.703	3.9509	4.8172	2.774	3.1127	3.5253	3.9075
-0.022468	2.7458	3.703	3.9357	4.8019	2.7779	3.1142	3.5253	3.9075
-0.022418	2.755	3.7	3.9112	4.8019	2.7702	3.1089	3.5253	3.9212
-0.022368	2.7695	3.6984	3.8884	4.8172	2.774	3.1035	3.5253	3.9334
-0.022319	2.7771	3.6893	3.8441	4.8141	2.7817	3.0875	3.5253	3.935
-0.022269	2.7725	3.687	3.8349	4.8141	2.7832	3.0699	3.5253	3.9334
-0.022219	2.7725	3.6786	3.9219	4.8325	2.7855	3.073	3.5253	3.9334
-0.022169	2.7763	3.6725	3.9585	4.834	2.7863	3.0768	3.5284	3.9334
-0.022119	2.7763	3.6702	4.0058	4.834	2.784	3.086	3.5299	3.9334
-0.022069	2.7779	3.6679	4.0181	4.834	2.7832	3.0928	3.536	3.935
-0.02202	2.7756	3.6626	4.0455	4.8248	2.7786	3.0997	3.5452	3.9411
-0.02197	2.7687	3.6504	4.0593	4.834	2.7748	3.1066	3.5513	3.9517
-0.02192	2.771	3.6504	4.0593	4.8325	2.7756	3.1104	3.565	3.9472
-0.02187	2.7657	3.6519	4.0501	4.8325	2.7817	3.1104	3.5543	3.9411
-0.02182	2.7634	3.6542	4.0379	4.8325	2.7817	3.1104	3.5543	3.938
-0.021771	2.7557	3.6412	4.0303	4.8279	2.7817	3.1195	3.565	3.9273
-0.021721	2.7557	3.6473	4.0165	4.8325	2.784	3.1249	3.5726	3.9136
-0.021671	2.7519	3.6595	4.0013	4.834	2.787	3.1241	3.5757	3.9029
-0.021621	2.7481	3.6633	3.9799	4.8386	2.7893	3.1256	3.5757	3.8877
-0.021571	2.7466	3.6656	3.9601	4.8431	2.7878	3.1249	3.5772	3.8739
-0.021521	2.7451	3.6671	3.957	4.8431	2.7924	3.1272	3.5787	3.8571
-0.021472	2.7412	3.6694	3.954	4.8447	2.7954	3.1279	3.5833	3.8465
-0.021422	2.7428	3.6725	3.9479	4.8462	2.7969	3.1302	3.5894	3.8602
-0.021372	2.7336	3.6816	3.9402	4.8584	2.7985	3.1317	3.6001	3.8602
-0.021322	2.7199	3.674	3.925	4.8615	2.8	3.1317	3.6093	3.8587
-0.021272	2.7115	3.674	3.9082	4.8615	2.8015	3.1295	3.6169	3.8617
-0.021223	2.7008	3.671	3.8945	4.8889	2.8	3.1226	3.6169	3.8632
-0.021173	2.6886	3.6633	3.8777	4.9011	2.8061	3.1134	3.6245	3.8632
-0.021123	2.6802	3.6534	3.8685	4.9026	2.8107	3.1089	3.6276	3.8678
-0.021073	2.6733	3.6465	3.8578	4.9026	2.8137	3.1043	3.6321	3.8785
-0.021023	2.6657	3.6382	3.8441	4.9042	2.8122	3.1043	3.6321	3.8892
-0.020973	2.6627	3.629	3.8288	4.9057	2.8183	3.1043	3.6383	3.8999
-0.020924	2.6543	3.6343	3.8151	4.9088	2.8259	3.1043	3.6154	3.9136
-0.020874	2.6505	3.6298	3.8121	4.9103	2.8297	3.1043	3.6154	3.9258
-0.020824	2.6466	3.6275	3.8121	4.9103	2.832	3.1043	3.6154	3.9334
-0.020774	2.636	3.6305	3.8105	4.9088	2.8358	3.1058	3.6108	3.9365
-0.020724	2.6237	3.6343	3.806	4.8904	2.8419	3.102	3.6108	3.9441
-0.020675	2.6146	3.6336	3.8273	4.8904	2.8419	3.0974	3.6154	3.9563
-0.020625	2.6062	3.6343	3.8349	4.8904	2.8442	3.0913	3.6184	3.9701
-0.020575	2.5993	3.6366	3.8365	4.8904	2.8465	3.0898	3.6215	3.9807
-0.020525	2.5894	3.6397	3.8365	4.8904	2.8488	3.0852	3.6108	3.9838
-0.020475	2.5795	3.6473	3.8426	4.8843	2.845	3.0799	3.6108	3.9868
-0.020425	2.5757	3.6557	3.8426	4.8721	2.845	3.0791	3.6138	3.9929
-0.020376	2.5703	3.6542	3.8426	4.863	2.845	3.0852	3.6138	4.0158
-0.020326	2.5642	3.6542	3.8426	4.8569	2.8496	3.0875	3.6138	4.0158
-0.020276	2.5581	3.6549	3.8426	4.8569	2.8496	3.086	3.6138	4.0158
-0.020226	2.5513	3.6549	3.8426	4.8569	2.8496	3.0829	3.6108	4.0158
-0.020176	2.5406	3.6519	3.8563	4.8523	2.8458	3.0776	3.6138	4.0219
-0.020127	2.5375	3.6481	3.87	4.8508	2.8419	3.0791	3.6184	4.0219
-0.020077	2.5276	3.6443	3.87	4.8492	2.8397	3.0791	3.6215	4.0219
-0.020027	2.5146	3.6427	3.87	4.8492	2.8419	3.076	3.6184	4.0219
-0.019977	2.5146	3.642	3.8807	4.8401	2.8389	3.0753	3.6215	4.0219
-0.019927	2.5146	3.642	3.9204	4.8401	2.8351	3.0768	3.6291	4.0219
-0.019877	2.5063	3.6397	3.9463	4.8294	2.8366	3.0768	3.6459	4.0219
-0.019828	2.5002	3.6275	3.9509	4.8248	2.8336	3.0799	3.655	4.025
-0.019778	2.5024	3.6145	3.9601	4.8233	2.8221	3.0799	3.655	4.0219
-0.019728	2.5047	3.6122	3.9799	4.8203	2.8252	3.0707	3.655	4.0128
-0.019678	2.5017	3.6099	4.0028	4.8203	2.8275	3.0646	3.6566	4.0128
-0.019628	2.5017	3.6084	4.0165	4.8203	2.8297	3.0631	3.6596	4.0128
-0.019579	2.5085	3.6069	4.0272	4.8233	2.8221	3.0646	3.6459	3.9991
-0.019529	2.5108	3.6092	4.0333	4.8233	2.8221	3.0646	3.6306	3.9868
-0.019479	2.5024	3.613	4.0516	4.8233	2.8275	3.0684	3.6215	3.9868
-0.019429	2.5017	3.6229	4.0821	4.8233	2.829	3.0722	3.6047	3.9746
-0.019379	2.5162	3.6206	4.1066	4.8233	2.8267	3.073	3.5971	3.9655
-0.019329	2.5146	3.6206	4.134	4.8233	2.8214	3.0722	3.6093	3.9609
-0.01928	2.5108	3.6206	4.1829	4.8233	2.8122	3.0715	3.6245	3.9609
-0.01923	2.5009	3.6206	4.2225	4.8248	2.8053	3.0715	3.6291	3.9609
-0.01918	2.491	3.6229	4.2485	4.8248	2.8023	3.0722	3.6215	3.9563
-0.01913	2.4849	3.6229	4.2668	4.8233	2.8	3.073	3.6215	3.9548
-0.01908	2.4712	3.6206	4.2622	4.8187	2.8	3.0791	3.6169	3.9487
-0.019031	2.4567	3.616	4.2561	4.8141	2.7924	3.0844	3.6169	3.9395
-0.018981	2.446	3.6031	4.2561	4.8187	2.7855	3.0928	3.6169	3.9304
-0.018931	2.4384	3.5939	4.2363	4.8233	2.7885	3.0928	3.6123	3.9304
-0.018881	2.4414	3.5893	4.2179	4.8248	2.7855	3.0791	3.6016	3.9197
-0.018831	2.4452	3.5863	4.2179	4.8294	2.7824	3.0783	3.5986	3.9121
-0.018781	2.4452	3.5847	4.2179	4.8355	2.7786	3.0776	3.5848	3.9121
-0.018732	2.4475	3.5878	4.2347	4.8355	2.774	3.0776	3.5711	3.9121
-0.018682	2.446	3.5863	4.2347	4.8355	2.7702	3.0753	3.5665	3.9121
-0.018632	2.446	3.5802	4.253	4.8355	2.7679	3.0799	3.5528	3.9197
-0.018582	2.4437	3.5786	4.2561	4.8447	2.7626	3.0783	3.5314	3.9197
-0.018532	2.4414	3.5786	4.2561	4.8447	2.7687	3.0814	3.5406	3.9395
-0.018483	2.4269	3.5786	4.253	4.8447	2.771	3.0806	3.5528	3.9395
-0.018433	2.417	3.5786	4.2424	4.8447	2.7679	3.0799	3.5696	3.9243
-0.018383	2.4124	3.5786	4.2424	4.8447	2.7687	3.0753	3.5803	3.9197
-0.018333	2.4078	3.5748	4.2424	4.8447	2.7733	3.0699	3.5803	3.9121
-0.018283	2.4071	3.5756	4.2424	4.8706	2.7786	3.0692	3.5803	3.9121
-0.018233	2.3956	3.5725	4.2424	4.8706	2.7817	3.0654	3.5803	3.9075
-0.018184	2.3956	3.5725	4.2256	4.8706	2.7824	3.0661	3.5803	3.906
-0.018134	2.3895	3.5855	4.2179	4.866	2.7847	3.0661	3.5803	3.8922
-0.018084	2.3781	3.5855	4.2118	4.8386	2.7847	3.0715	3.5833	3.877
-0.018034	2.3781	3.5786	4.2073	4.8325	2.7809	3.0715	3.5894	3.8724
-0.017984	2.3842	3.5664	4.2073	4.8325	2.7794	3.0715	3.5894	3.8663
-0.017935	2.3788	3.5672	4.2073	4.8325	2.7733	3.0745	3.5894	3.8663
-0.017885	2.375	3.5741	4.2073	4.8386	2.771	3.0776	3.6016	3.8663
-0.017835	2.3834	3.5779	4.1905	4.8386	2.7649	3.0776	3.6108	3.8587
-0.017785	2.3918	3.5832	4.1844	4.8325	2.7649	3.0844	3.6154	3.8526
-0.017735	2.401	3.5832	4.1767	4.8325	2.7687	3.0844	3.6367	3.8526
-0.017685	2.3994	3.5794	4.1676	4.8264	2.771	3.0928	3.6657	3.8526
-0.017636	2.3918	3.5664	4.1676	4.8264	2.7718	3.0966	3.6779	3.8526
-0.017586	2.3834	3.5649	4.1645	4.8264	2.7748	3.0989	3.681	3.8526
-0.017536	2.3796	3.5764	4.1584	4.8264	2.771	3.1035	3.6932	3.8587
-0.017486	2.3773	3.5802	4.1523	4.8264	2.7756	3.1111	3.6932	3.8587
-0.017436	2.3727	3.587	4.1432	4.8264	2.7756	3.1142	3.6932	3.8587
-0.017387	2.3689	3.587	4.1325	4.8264	2.7725	3.1195	3.713	3.8571
-0.017337	2.3689	3.587	4.1203	4.8203	2.7771	3.1226	3.7237	3.8571
-0.017287	2.3758	3.5802	4.102	4.8203	2.7771	3.1249	3.7283	3.8571
-0.017237	2.3796	3.5802	4.0928	4.8203	2.7756	3.1256	3.7329	3.8663
-0.017187	2.3911	3.5802	4.0928	4.8203	2.7756	3.1241	3.7374	3.8724
-0.017137	2.3911	3.5703	4.0928	4.8203	2.7809	3.118	3.7374	3.877
-0.017088	2.3911	3.5786	4.0913	4.7989	2.7832	3.1104	3.7374	3.88
-0.017038	2.4017	3.5809	4.0913	4.7958	2.7794	3.1111	3.7405	3.8739
-0.016988	2.4048	3.5771	4.0821	4.7958	2.7779	3.1188	3.742	3.88
-0.016938	2.4101	3.5718	4.0852	4.7958	2.7779	3.118	3.739	3.8816
-0.016888	2.4147	3.5619	4.0852	4.7943	2.7794	3.1226	3.7344	3.8831
-0.016839	2.4155	3.5481	4.0776	4.7928	2.7679	3.1302	3.7252	3.8739
-0.016789	2.4139	3.542	4.0715	4.7882	2.7588	3.1378	3.7252	3.8571
-0.016739	2.4231	3.5458	4.0638	4.7821	2.7626	3.1424	3.7252	3.8663
-0.016689	2.4269	3.5474	4.0577	4.7806	2.7664	3.1516	3.7222	3.8571
-0.016639	2.43	3.5497	4.0516	4.7791	2.7695	3.1623	3.7176	3.8495
-0.016589	2.4315	3.5558	4.0547	4.7791	2.7657	3.163	3.7176	3.8556
-0.01654	2.4376	3.5542	4.0547	4.776	2.7588	3.1661	3.7176	3.8556
-0.01649	2.4345	3.5542	4.0547	4.7729	2.7588	3.1722	3.7222	3.8495
-0.01644	2.4277	3.5481	4.0547	4.7592	2.7527	3.1768	3.7222	3.8419
-0.01639	2.4277	3.5458	4.0547	4.7379	2.7565	3.179	3.7222	3.8465
-0.01634	2.433	3.5413	4.0501	4.7241	2.7565	3.1806	3.7222	3.8465
-0.016291	2.4414	3.5352	4.0425	4.718	2.7519	3.1806	3.7222	3.8465
-0.016241	2.4445	3.5291	4.0257	4.7058	2.7496	3.1806	3.7191	3.8419
-0.016191	2.4483	3.5268	4.0135	4.6982	2.7489	3.1813	3.7161	3.8419
-0.016141	2.4529	3.5283	4.0074	4.6951	2.7473	3.1867	3.7161	3.8419
-0.016091	2.4574	3.5298	4.0013	4.686	2.7458	3.1874	3.7069	3.8419
-0.016041	2.4719	3.5359	3.9952	4.6738	2.7412	3.1859	3.7039	3.8373
-0.015992	2.4857	3.5359	3.9845	4.6677	2.7412	3.1859	3.6978	3.8343
-0.015942	2.4918	3.5405	3.9769	4.657	2.7382	3.1897	3.6901	3.8343
-0.015892	2.4918	3.5474	3.9769	4.6448	2.7382	3.1897	3.6871	3.8343
-0.015842	2.4918	3.5542	3.9738	4.6371	2.7344	3.1874	3.6871	3.8343
-0.015792	2.4979	3.5519	3.9677	4.6173	2.7344	3.1874	3.6871	3.8343
-0.015743	2.4979	3.5497	3.957	4.6066	2.7451	3.1836	3.6901	3.8098
-0.015693	2.4986	3.5497	3.9433	4.5883	2.7588	3.1867	3.6856	3.8098
-0.015643	2.5009	3.5428	3.9433	4.5639	2.7679	3.1836	3.6688	3.8098
-0.015593	2.5009	3.5382	3.9433	4.5471	2.7687	3.1806	3.6642	3.8098
-0.015543	2.5055	3.5451	3.9433	4.5288	2.7718	3.1882	3.6642	3.8098
-0.015493	2.5185	3.5596	3.957	4.5212	2.7725	3.2027	3.6688	3.8098
-0.015444	2.533	3.5619	3.9616	4.5013	2.7702	3.2027	3.6688	3.7992
-0.015394	2.5459	3.555	3.957	4.4754	2.7695	3.1958	3.6718	3.7992
-0.015344	2.549	3.5489	3.957	4.4724	2.7695	3.189	3.6718	3.7992
-0.015294	2.549	3.5489	3.957	4.4724	2.7695	3.1836	3.6688	3.8053
-0.015244	2.549	3.539	3.9463	4.4724	2.7664	3.179	3.6672	3.8098
-0.015195	2.5345	3.5298	3.9372	4.4693	2.7649	3.1806	3.6642	3.8098
-0.015145	2.5421	3.5222	3.9372	4.4662	2.7664	3.176	3.6642	3.8098
-0.015095	2.5497	3.5199	3.9372	4.4617	2.7664	3.1691	3.6642	3.8159
-0.015045	2.5604	3.5199	3.9372	4.4586	2.7626	3.1638	3.6566	3.8251
-0.014995	2.5696	3.5321	3.9326	4.4525	2.7596	3.1569	3.6489	3.8297
-0.014945	2.5497	3.5222	3.9326	4.4434	2.7565	3.147	3.6489	3.8251
-0.014896	2.5467	3.526	3.9311	4.4296	2.7557	3.1462	3.6489	3.8159
-0.014846	2.5467	3.5291	3.9311	4.4235	2.7573	3.1447	3.6383	3.8098
-0.014796	2.5467	3.5298	3.9311	4.4159	2.7542	3.1432	3.6306	3.8083
-0.014746	2.5398	3.526	3.9311	4.4037	2.7496	3.1432	3.6215	3.8129
-0.014696	2.5261	3.5329	3.9219	4.4037	2.7374	3.1531	3.6199	3.8144
-0.014647	2.5215	3.5413	3.9112	4.3793	2.7267	3.1569	3.6093	3.8129
-0.014597	2.52	3.5413	3.9112	4.3594	2.7237	3.1554	3.6215	3.8083
-0.014547	2.5162	3.5344	3.9112	4.3533	2.7191	3.1592	3.6154	3.8129
-0.014497	2.5078	3.542	3.9097	4.3457	2.7168	3.1562	3.6154	3.8129
-0.014447	2.5009	3.5466	3.9097	4.3365	2.7122	3.1516	3.6093	3.8129
-0.014397	2.5009	3.5542	3.9097	4.3335	2.7046	3.147	3.6001	3.8129
-0.014348	2.4963	3.5611	3.9082	4.3335	2.7	3.1386	3.6001	3.8129
-0.014298	2.494	3.5756	3.9082	4.3335	2.6848	3.1302	3.6001	3.8129
-0.014248	2.4979	3.5817	3.9082	4.3182	2.6688	3.1295	3.6032	3.8129
-0.014198	2.4971	3.5863	3.9082	4.3152	2.6611	3.1264	3.6093	3.8083
-0.014148	2.494	3.5847	3.9082	4.335	2.6466	3.1241	3.6032	3.8053
-0.014099	2.4963	3.5748	3.9051	4.3442	2.6367	3.1264	3.6001	3.8053
-0.014049	2.4963	3.5664	3.899	4.3579	2.6421	3.1295	3.6001	3.8053
-0.013999	2.4963	3.5641	3.899	4.3762	2.6527	3.131	3.5909	3.8053
-0.013949	2.4994	3.5611	3.899	4.3915	2.6527	3.1325	3.5971	3.8053
-0.013899	2.507	3.5527	3.899	4.4083	2.6489	3.134	3.5894	3.8053
-0.013849	2.5139	3.5458	3.9051	4.4083	2.6527	3.1371	3.5971	3.8053
-0.0138	2.5139	3.5359	3.9082	4.4189	2.6596	3.1424	3.5971	3.7976
-0.01375	2.5101	3.526	3.9097	4.4235	2.6596	3.1447	3.5971	3.7931
-0.0137	2.5085	3.5207	3.9112	4.4281	2.6634	3.1447	3.5894	3.79
-0.01365	2.5085	3.5123	3.9158	4.4342	2.6672	3.1409	3.5894	3.7824
-0.0136	2.5139	3.5077	3.925	4.4495	2.6787	3.1371	3.5894	3.7717
-0.013551	2.5078	3.5077	3.9311	4.4769	2.6886	3.1371	3.6108	3.7717
-0.013501	2.5047	3.5046	3.9357	4.4937	2.6863	3.1432	3.6184	3.7717
-0.013451	2.5116	3.5023	3.9418	4.4983	2.6886	3.1394	3.6138	3.7778
-0.013401	2.5139	3.5046	3.9372	4.509	2.6917	3.1279	3.6047	3.7717
-0.013351	2.5238	3.5092	3.928	4.509	2.6985	3.1172	3.6032	3.758
-0.013301	2.5261	3.5031	3.9189	4.509	2.7031	3.1073	3.6062	3.7549
-0.013252	2.5238	3.5016	3.8975	4.5212	2.7084	3.1005	3.6062	3.7519
-0.013202	2.5192	3.5008	3.8975	4.5364	2.7138	3.0982	3.6169	3.7503
-0.013152	2.5162	3.5031	3.8975	4.5502	2.7138	3.0944	3.623	3.7503
-0.013102	2.5223	3.5008	3.8731	4.5609	2.7054	3.089	3.623	3.7503
-0.013052	2.5398	3.4901	3.8609	4.5609	2.7	3.0799	3.6321	3.7458
-0.013003	2.5528	3.4879	3.8502	4.5609	2.7016	3.0799	3.6459	3.7366
-0.012953	2.5604	3.4863	3.8441	4.57	2.7046	3.0806	3.6459	3.7397
-0.012903	2.5642	3.4787	3.8441	4.5776	2.7039	3.0821	3.6459	3.7397
-0.012853	2.578	3.4779	3.8426	4.5883	2.7008	3.0852	3.6321	3.7397
-0.012803	2.5955	3.4734	3.8426	4.6005	2.6978	3.0821	3.623	3.7366
-0.012753	2.6054	3.4734	3.8426	4.6112	2.6978	3.0821	3.623	3.7366
-0.012704	2.61	3.4734	3.8426	4.6173	2.6878	3.0852	3.6169	3.7366
-0.012654	2.6131	3.4756	3.8426	4.6188	2.6802	3.0921	3.6169	3.7534
-0.012604	2.6169	3.4711	3.8426	4.6265	2.6802	3.0921	3.6169	3.7824
-0.012554	2.6207	3.4703	3.838	4.6402	2.6833	3.086	3.6169	3.7915
-0.012504	2.6253	3.4695	3.838	4.6463	2.6833	3.0791	3.6169	3.8175
-0.012455	2.6299	3.468	3.838	4.6463	2.6871	3.0753	3.6169	3.8251
-0.012405	2.6474	3.468	3.838	4.6402	2.6833	3.0738	3.6306	3.8327
-0.012355	2.6573	3.468	3.8304	4.6265	2.6794	3.0738	3.6398	3.8358
-0.012305	2.6634	3.468	3.8243	4.6265	2.6779	3.073	3.6428	3.8404
-0.012255	2.6634	3.468	3.8243	4.6265	2.6764	3.0707	3.6428	3.8358
-0.012205	2.6657	3.4673	3.8273	4.6265	2.6764	3.0707	3.6596	3.8327
-0.012156	2.6657	3.4673	3.838	4.6524	2.6772	3.0707	3.6794	3.8327
-0.012106	2.6649	3.4657	3.838	4.6524	2.6855	3.0707	3.6917	3.8358
-0.012056	2.6649	3.468	3.838	4.6524	2.6871	3.0715	3.7054	3.8404
-0.012006	2.6611	3.4634	3.838	4.6616	2.6886	3.073	3.7283	3.851
-0.011956	2.655	3.4665	3.8273	4.6722	2.6886	3.0768	3.7283	3.851
-0.011907	2.6588	3.4734	3.8197	4.6722	2.7016	3.0768	3.7283	3.851
-0.011857	2.6543	3.4856	3.8105	4.6738	2.7084	3.0791	3.7298	3.851
-0.011807	2.6543	3.4947	3.7983	4.6738	2.7122	3.0738	3.7481	3.851
-0.011757	2.6543	3.5008	3.8105	4.6738	2.7	3.0738	3.7542	3.8602
-0.011707	2.6581	3.5062	3.8105	4.6738	2.7008	3.0738	3.7573	3.8678
-0.011657	2.6596	3.5168	3.8197	4.6738	2.7138	3.0738	3.7405	3.8678
-0.011608	2.6642	3.5352	3.7922	4.6738	2.7107	3.0699	3.7329	3.8755
-0.011558	2.6604	3.5374	3.7648	4.6799	2.7092	3.0745	3.7298	3.8678
-0.011508	2.6588	3.5458	3.7526	4.7028	2.7092	3.076	3.7298	3.8724
-0.011458	2.6634	3.5542	3.7419	4.7318	2.7092	3.076	3.7298	3.8724
-0.011408	2.6611	3.558	3.7373	4.7409	2.7069	3.0768	3.7268	3.8724
-0.011359	2.6627	3.568	3.7342	4.7562	2.7023	3.0829	3.7191	3.8724
-0.011309	2.6642	3.571	3.7266	4.7882	2.7016	3.0814	3.7069	3.8724
-0.011259	2.6611	3.568	3.719	4.7897	2.7016	3.086	3.6993	3.8755
-0.011209	2.6588	3.5657	3.7114	4.808	2.7031	3.0867	3.6947	3.8755
-0.011159	2.6566	3.5703	3.7037	4.8157	2.7031	3.089	3.6901	3.8922
-0.011109	2.6566	3.5786	3.6976	4.8264	2.7031	3.0821	3.7023	3.8922
-0.01106	2.6611	3.5687	3.6885	4.834	2.7008	3.0791	3.7115	3.906
-0.01101	2.6543	3.5657	3.6793	4.8355	2.7016	3.076	3.7176	3.9197
-0.01096	2.6405	3.5725	3.6702	4.8325	2.6985	3.0753	3.7283	3.9365
-0.01091	2.6306	3.5748	3.6595	4.8416	2.6833	3.076	3.7374	3.9563
-0.01086	2.6253	3.5794	3.6381	4.8416	2.668	3.0715	3.7496	3.9731
-0.010811	2.6253	3.5847	3.6167	4.8416	2.6619	3.0707	3.7618	3.9823
-0.010761	2.6306	3.597	3.6015	4.8447	2.6581	3.0707	3.7634	3.9929
-0.010711	2.6306	3.6023	3.5893	4.8447	2.6527	3.0699	3.7786	3.9929
-0.010661	2.6306	3.5985	3.5771	4.8462	2.6451	3.0661	3.7847	3.9929
-0.010611	2.6321	3.5878	3.5618	4.8294	2.6436	3.0608	3.7679	4.0052
-0.010561	2.6321	3.5748	3.5405	4.8294	2.6344	3.0608	3.7679	4.0143
-0.010512	2.6443	3.5741	3.5038	4.8294	2.636	3.0661	3.7679	4.0189
-0.010462	2.6657	3.5733	3.4932	4.8294	2.636	3.0692	3.7679	4.028
-0.010412	2.6726	3.5733	3.4932	4.8218	2.639	3.0692	3.7664	4.0372
-0.010362	2.6802	3.5733	3.4932	4.8294	2.6428	3.0692	3.7664	4.054
-0.010312	2.6871	3.5687	3.4886	4.8325	2.6657	3.0692	3.7664	4.054
-0.010263	2.6985	3.5626	3.487	4.8355	2.6695	3.0715	3.7618	4.054
-0.010213	2.7054	3.5573	3.487	4.8416	2.6924	3.0722	3.7573	4.0769
-0.010163	2.7023	3.5535	3.487	4.8508	2.6901	3.076	3.7527	4.0891
-0.010113	2.7016	3.5451	3.487	4.8508	2.6901	3.0799	3.7451	4.0921
-0.010063	2.7016	3.5382	3.4855	4.8508	2.6878	3.0799	3.742	4.0982
-0.010013	2.7061	3.5382	3.484	4.8416	2.6855	3.0799	3.7405	4.1059
-0.0099636	2.7084	3.5329	3.4733	4.8355	2.6802	3.0837	3.7344	4.1196
-0.0099138	2.7084	3.5138	3.4596	4.8325	2.6756	3.0791	3.7268	4.1089
-0.009864	2.7061	3.4932	3.455	4.8294	2.6756	3.0738	3.7176	4.1089
-0.0098142	2.7	3.4886	3.4535	4.8294	2.6756	3.0699	3.7039	4.0952
-0.0097644	2.7	3.4901	3.4489	4.8294	2.6726	3.0684	3.6962	4.0876
-0.0097145	2.7	3.4924	3.4459	4.8279	2.6741	3.0524	3.6932	4.083
-0.0096647	2.7	3.4901	3.4459	4.8203	2.6779	3.0524	3.6871	4.0814
-0.0096149	2.7061	3.4886	3.4336	4.8203	2.684	3.0524	3.6733	4.0753
-0.0095651	2.71	3.4856	3.4275	4.8203	2.6909	3.0379	3.655	4.0677
-0.0095153	2.7122	3.4818	3.4382	4.8203	2.7016	3.0318	3.6444	4.0631
-0.0094655	2.7199	3.4787	3.4443	4.8279	2.7077	3.0318	3.6444	4.0586
-0.0094156	2.7176	3.4787	3.4459	4.8325	2.7077	3.0265	3.6444	4.0525
-0.0093658	2.7176	3.484	3.4459	4.8355	2.7077	3.0204	3.6459	4.0525
-0.009316	2.7138	3.4962	3.4459	4.8416	2.7077	3.0204	3.6505	4.0448
-0.0092662	2.7138	3.4962	3.4459	4.8508	2.7077	3.0173	3.6505	4.0418
-0.0092164	2.7138	3.4962	3.4459	4.8508	2.7084	3.0158	3.6505	4.0402
-0.0091665	2.7122	3.4871	3.4459	4.8508	2.713	3.0158	3.6535	4.0402
-0.0091167	2.71	3.4909	3.4443	4.8508	2.7176	3.0112	3.6596	4.0402
-0.0090669	2.7061	3.4924	3.4443	4.8508	2.7191	3.0104	3.6596	4.0372
-0.0090171	2.7061	3.5031	3.4443	4.8416	2.7206	3.0043	3.6535	4.0311
-0.0089673	2.7061	3.5092	3.4443	4.837	2.7191	2.9959	3.6535	4.025
-0.0089175	2.7039	3.51	3.4443	4.837	2.7206	2.9898	3.6596	4.025
-0.0088676	2.7	3.5229	3.4397	4.8355	2.7206	2.986	3.6596	4.025
-0.0088178	2.6955	3.5268	3.4397	4.8355	2.7206	2.9845	3.6596	4.0204
-0.008768	2.7069	3.5382	3.4443	4.837	2.7168	2.9845	3.6596	4.0143
-0.0087182	2.7031	3.5405	3.4443	4.8416	2.713	2.9822	3.6596	4.0143
-0.0086684	2.7031	3.5428	3.4443	4.8416	2.7145	2.9792	3.6596	4.0021
-0.0086185	2.7031	3.5458	3.4275	4.837	2.7214	2.9769	3.6657	3.9868
-0.0085687	2.7	3.5497	3.4092	4.837	2.729	2.9723	3.6688	3.9716
-0.0085189	2.6932	3.5542	3.3848	4.837	2.729	2.9685	3.6688	3.9548
-0.0084691	2.6886	3.5527	3.3757	4.837	2.7344	2.9708	3.6657	3.9426
-0.0084193	2.6878	3.5474	3.3726	4.837	2.7359	2.9624	3.6611	3.9426
-0.0083695	2.6863	3.5504	3.3726	4.837	2.739	2.9593	3.6611	3.9426
-0.0083196	2.6802	3.5504	3.3726	4.8355	2.7397	2.9563	3.6611	3.9426
-0.0082698	2.6794	3.5519	3.3726	4.8294	2.7512	2.9509	3.6535	3.9426
-0.00822	2.6649	3.5527	3.3726	4.8141	2.7527	2.9517	3.6535	3.9426
-0.0081702	2.6543	3.5527	3.3726	4.8141	2.7588	2.9441	3.6535	3.9548
-0.0081204	2.6543	3.5596	3.3726	4.8141	2.7611	2.9341	3.6535	3.964
-0.0080705	2.6482	3.5733	3.3726	4.7943	2.7626	2.925	3.6535	3.9563
-0.0080207	2.6482	3.5817	3.3696	4.7852	2.7634	2.925	3.6505	3.9655
-0.0079709	2.6451	3.587	3.3635	4.7852	2.7649	2.9318	3.6459	3.9563
-0.0079211	2.6398	3.587	3.3589	4.7836	2.7702	2.9395	3.6245	3.9319
-0.0078713	2.6299	3.587	3.3497	4.8004	2.7756	2.9418	3.5864	3.9044
-0.0078215	2.6215	3.5909	3.3482	4.8416	2.7824	2.9341	3.565	3.8907
-0.0077716	2.6176	3.5947	3.3482	4.8721	2.787	2.9265	3.562	3.8861
-0.0077218	2.6146	3.6031	3.3482	4.8798	2.7969	2.9189	3.5543	3.8816
-0.007672	2.6176	3.6076	3.3345	4.8813	2.8008	2.9135	3.5528	3.877
-0.0076222	2.6146	3.5992	3.3299	4.8889	2.8061	2.912	3.5589	3.938
-0.0075724	2.6108	3.597	3.3162	4.9194	2.8145	2.9166	3.562	3.9212
-0.0075225	2.5978	3.5947	3.3162	4.9133	2.8145	2.9166	3.562	3.9075
-0.0074727	2.5864	3.5893	3.3162	4.9057	2.8175	2.909	3.562	3.9029
-0.0074229	2.5826	3.5825	3.3162	4.9042	2.8175	2.9059	3.562	3.8968
-0.0073731	2.581	3.5825	3.3162	4.9042	2.8206	2.9021	3.5574	3.8831
-0.0073233	2.581	3.5825	3.3162	4.895	2.8175	2.899	3.562	3.8739
-0.0072735	2.5795	3.5825	3.3162	4.8828	2.8152	2.9006	3.565	3.8694
-0.0072236	2.5772	3.5825	3.3162	4.8782	2.813	2.9036	3.5681	3.8617
-0.0071738	2.5726	3.5863	3.3162	4.8767	2.7939	2.9067	3.5711	3.8632
-0.007124	2.5681	3.5825	3.3162	4.8737	2.7893	2.9067	3.5726	3.8556
-0.0070742	2.5658	3.587	3.3162	4.8737	2.7962	2.9067	3.5726	3.8541
-0.0070244	2.5581	3.5893	3.3024	4.8676	2.7939	2.9097	3.5726	3.851
-0.0069745	2.5497	3.5901	3.3055	4.8553	2.7931	2.9097	3.5726	3.851
-0.0069247	2.5452	3.5809	3.3116	4.8431	2.7954	2.9151	3.5772	3.8541
-0.0068749	2.5406	3.5756	3.3116	4.8431	2.803	2.9212	3.5818	3.8541
-0.0068251	2.5421	3.5695	3.3116	4.8431	2.8	2.9257	3.5833	3.8556
-0.0067753	2.5398	3.5672	3.3116	4.8431	2.7977	2.928	3.5726	3.8632
-0.0067255	2.5391	3.5649	3.3238	4.8431	2.7962	2.9296	3.5559	3.877
-0.0066756	2.5452	3.5634	3.3543	4.8431	2.7954	2.9273	3.5559	3.877
-0.0066258	2.549	3.5634	3.3543	4.8431	2.7931	2.9311	3.5513	3.877
-0.006576	2.5543	3.5588	3.3711	4.8523	2.7939	2.9479	3.5467	3.8846
-0.0065262	2.5543	3.5527	3.3772	4.8523	2.8	2.957	3.5436	3.8861
-0.0064764	2.549	3.5481	3.3833	4.8523	2.8053	2.9639	3.5406	3.8861
-0.0064265	2.5467	3.5481	3.3924	4.8523	2.8099	2.9639	3.5406	3.8861
-0.0063767	2.5482	3.5474	3.4153	4.8523	2.8114	2.9692	3.5375	3.8861
-0.0063269	2.5482	3.5451	3.4184	4.8523	2.8091	2.9807	3.536	3.8861
-0.0062771	2.5528	3.5443	3.423	4.8386	2.8091	2.9822	3.5192	3.8861
-0.0062273	2.5528	3.5435	3.423	4.8386	2.8084	2.9822	3.4918	3.8861
-0.0061775	2.5528	3.5451	3.423	4.8431	2.803	2.9822	3.4918	3.8861
-0.0061276	2.5566	3.5497	3.423	4.8431	2.7931	2.9822	3.4735	3.8968
-0.0060778	2.5612	3.5535	3.423	4.8431	2.7863	2.9814	3.4628	3.9075
-0.006028	2.5642	3.5634	3.4336	4.8386	2.784	2.9898	3.4475	3.9289
-0.0059782	2.5665	3.5558	3.4413	4.834	2.7809	3.002	3.4292	3.9945
-0.0059284	2.5642	3.5558	3.4459	4.834	2.7786	3.015	3.4216	4.0326
-0.0058785	2.5665	3.5634	3.4611	4.8355	2.7802	3.0341	3.4139	4.028
-0.0058287	2.5673	3.571	3.4794	4.8355	2.7802	3.0493	3.4033	4.0143
-0.0057789	2.5681	3.5725	3.4794	4.8355	2.7817	3.0463	3.4033	4.0021
-0.0057291	2.565	3.5756	3.4794	4.834	2.7863	3.0554	3.4033	4.0021
-0.0056793	2.565	3.5771	3.4977	4.834	2.784	3.0608	3.4033	3.9762
-0.0056295	2.565	3.5741	3.516	4.834	2.784	3.0608	3.4033	3.9746
-0.0055796	2.5612	3.5725	3.5237	4.834	2.784	3.0608	3.4033	3.9685
-0.0055298	2.5612	3.5733	3.5298	4.8386	2.784	3.0608	3.4033	3.9395
-0.00548	2.5581	3.5764	3.516	4.834	2.7893	3.0417	3.4033	3.9243
-0.0054302	2.5612	3.5802	3.5069	4.8279	2.7832	3.0356	3.3972	3.9121
-0.0053804	2.5658	3.5893	3.5054	4.834	2.7817	3.0356	3.4048	3.9044
-0.0053305	2.5696	3.6015	3.4947	4.834	2.7756	3.0318	3.4048	3.8968
-0.0052807	2.5688	3.6069	3.4901	4.8203	2.7702	3.0318	3.4048	3.8861
-0.0052309	2.565	3.6099	3.5008	4.808	2.7618	3.0356	3.4048	3.9014
-0.0051811	2.5604	3.6153	3.5084	4.8141	2.7611	3.0356	3.3956	3.9228
-0.0051313	2.5558	3.6183	3.5084	4.808	2.7626	3.0356	3.388	3.9319
-0.0050815	2.5558	3.6237	3.516	4.7989	2.7626	3.0493	3.388	3.9319
-0.0050316	2.5574	3.6229	3.516	4.7989	2.7756	3.057	3.388	3.9319
-0.0049818	2.5635	3.6305	3.5191	4.8126	2.7916	3.0684	3.3972	3.938
-0.004932	2.5703	3.6351	3.5221	4.8126	2.7977	3.0799	3.4033	3.938
-0.0048822	2.5764	3.6343	3.5221	4.8126	2.7992	3.0875	3.4094	3.938
-0.0048324	2.5764	3.6328	3.5221	4.8248	2.8069	3.1241	3.4094	3.938
-0.0047825	2.5734	3.6343	3.5221	4.8126	2.8152	3.1226	3.4094	3.938
-0.0047327	2.5803	3.6351	3.5313	4.7989	2.8191	3.115	3.4094	3.938
-0.0046829	2.5826	3.6313	3.5481	4.7989	2.8206	3.1043	3.4094	3.9395
-0.0046331	2.581	3.6206	3.5511	4.7989	2.8252	3.1043	3.4094	3.9502
-0.0045833	2.581	3.6107	3.542	4.8126	2.829	3.1104	3.4155	3.9746
-0.0045335	2.581	3.6099	3.542	4.8248	2.8358	3.1134	3.4155	3.9746
-0.0044836	2.5803	3.6061	3.542	4.8248	2.8381	3.1172	3.4155	3.9746
-0.0044338	2.5803	3.5992	3.542	4.8248	2.8313	3.1195	3.4155	3.9945
-0.004384	2.5803	3.5992	3.5313	4.8248	2.832	3.1211	3.4155	3.9975
-0.0043342	2.5795	3.5939	3.5313	4.8126	2.832	3.1256	3.4155	3.9991
-0.0042844	2.5795	3.6092	3.5313	4.8126	2.8328	3.1409	3.4216	3.9991
-0.0042345	2.5742	3.6504	3.5313	4.8126	2.8397	3.1432	3.4216	3.9991
-0.0041847	2.5688	3.6717	3.5344	4.8248	2.8427	3.1554	3.4216	4.0006
-0.0041349	2.5673	3.6755	3.5435	4.8279	2.8435	3.1592	3.4216	4.0052
-0.0040851	2.5673	3.7015	3.5557	4.8279	2.845	3.1653	3.4323	4.0113
-0.0040353	2.5696	3.7076	3.5603	4.8431	2.8435	3.1745	3.4521	4.0052
-0.0039855	2.5772	3.7045	3.5557	4.8431	2.8389	3.1836	3.4811	3.9991
-0.0039356	2.5787	3.748	3.5557	4.8401	2.8389	3.1897	3.5208	3.9991
-0.0038858	2.5848	3.7869	3.5603	4.8462	2.8427	3.1912	3.5086	3.9991
-0.003836	2.5864	3.7816	3.5756	4.8462	2.8351	3.189	3.5086	3.9991
-0.0037862	2.5864	3.7663	3.5771	4.8401	2.8374	3.1851	3.533	3.9975
-0.0037364	2.5894	3.7923	3.5572	4.8401	2.8313	3.1851	3.5086	3.9945
-0.0036865	2.5925	3.8075	3.5572	4.8462	2.8275	3.1798	3.4841	3.9945
-0.0036367	2.5925	3.8297	3.5572	4.8462	2.8221	3.1684	3.4841	3.9945
-0.0035869	2.5925	3.8312	3.5481	4.8462	2.8152	3.1592	3.4902	4.0036
-0.0035371	2.5993	3.8373	3.5481	4.8569	2.8114	3.1539	3.5086	4.0036
-0.0034873	2.6039	3.838	3.5481	4.8645	2.803	3.1539	3.5223	3.9945
-0.0034375	2.6062	3.8441	3.5481	4.8615	2.7969	3.1584	3.5269	3.9838
-0.0033876	2.607	3.848	3.545	4.8615	2.7901	3.1584	3.5375	3.9838
-0.0033378	2.6138	3.8541	3.545	4.8615	2.7824	3.1584	3.5497	3.9838
-0.003288	2.623	3.8594	3.545	4.8615	2.787	3.1562	3.5559	3.9609
-0.0032382	2.6321	3.8594	3.5344	4.8645	2.7954	3.1554	3.5589	3.9609
-0.0031884	2.6428	3.8693	3.5344	4.8645	2.8069	3.1584	3.5589	3.9838
-0.0031385	2.6482	3.8808	3.5344	4.8706	2.8152	3.1653	3.5589	3.9945
-0.0030887	2.6543	3.8846	3.545	4.8813	2.8152	3.1653	3.5589	3.9945
-0.0030389	2.6619	3.8869	3.545	4.8813	2.8229	3.1592	3.5635	3.9945
-0.0029891	2.6649	3.8876	3.545	4.8874	2.8259	3.1592	3.5818	3.9945
-0.0029393	2.6649	3.8876	3.5588	4.8996	2.829	3.1607	3.5833	4.0036
-0.0028895	2.6581	3.8922	3.571	4.8996	2.8313	3.1592	3.5833	4.0097
-0.0028396	2.655	3.8968	3.5893	4.8996	2.8358	3.1592	3.5833	3.9991
-0.0027898	2.655	3.8998	3.5939	4.9179	2.8404	3.1592	3.5833	3.9884
-0.00274	2.6466	3.8998	3.5893	4.9179	2.8404	3.1592	3.5803	3.9823
-0.0026902	2.636	3.9006	3.574	4.9179	2.8404	3.1584	3.5726	3.9838
-0.0026404	2.6321	3.9006	3.574	4.9179	2.8358	3.1584	3.5726	3.9762
-0.0025905	2.6237	3.9174	3.574	4.9332	2.8358	3.1684	3.5726	3.9762
-0.0025407	2.6237	3.9349	3.574	4.9423	2.8374	3.1699	3.5803	3.9762
-0.0024909	2.623	3.9349	3.5893	4.9438	2.8397	3.1699	3.5726	3.9762
-0.0024411	2.6245	3.9479	3.5939	4.9438	2.8427	3.1699	3.5726	3.9762
-0.0023913	2.6169	3.9655	3.5939	4.9438	2.8427	3.1729	3.5711	3.9762
-0.0023415	2.6054	3.9777	3.5893	4.9438	2.8366	3.1752	3.565	3.9838
-0.0022916	2.5986	3.9883	3.5771	4.9438	2.8282	3.1768	3.5543	3.9929
-0.0022418	2.5948	3.9967	3.5893	4.9438	2.832	3.1768	3.5543	3.9884
-0.002192	2.5887	4.0089	3.5939	4.9438	2.829	3.1806	3.5543	3.9884
-0.0021422	2.5841	4.0227	3.5984	4.9438	2.829	3.179	3.5497	3.9823
-0.0020924	2.5795	4.0334	3.6061	4.9438	2.8343	3.1897	3.5467	3.9823
-0.0020425	2.5742	4.0395	3.6061	4.9408	2.8343	3.1966	3.5375	3.9823
-0.0019927	2.5742	4.044	3.6061	4.9408	2.8366	3.2004	3.5116	3.9807
-0.0019429	2.5742	4.057	3.6061	4.9408	2.8351	3.1951	3.4933	3.9731
-0.0018931	2.5772	4.0715	3.6061	4.9408	2.8297	3.1935	3.4887	3.9701
-0.0018433	2.5795	4.0723	3.6061	4.9408	2.8389	3.1905	3.4826	3.9701
-0.0017935	2.5795	4.0784	3.6061	4.9408	2.8389	3.1905	3.4689	3.9701
-0.0017436	2.5757	4.0875	3.5969	4.9438	2.8297	3.1935	3.4551	3.9701
-0.0016938	2.5658	4.099	3.5969	4.9408	2.8282	3.1874	3.4506	3.9701
-0.001644	2.5581	4.1112	3.5969	4.9316	2.8229	3.1798	3.4475	3.9594
-0.0015942	2.5551	4.1127	3.5969	4.9179	2.8175	3.176	3.4551	3.9594
-0.0015444	2.5597	4.1142	3.5969	4.9103	2.8038	3.176	3.4658	3.9701
-0.0014945	2.5642	4.1173	3.6061	4.9057	2.7977	3.1729	3.4765	3.9701
-0.0014447	2.5589	4.1188	3.6091	4.9057	2.803	3.1729	3.4796	3.9701
-0.0013949	2.5513	4.1188	3.6076	4.8981	2.8076	3.1737	3.4811	3.9594
-0.0013451	2.549	4.115	3.6015	4.8981	2.8076	3.1737	3.4811	3.9533
-0.0012953	2.5452	4.1089	3.6015	4.8981	2.803	3.179	3.4811	3.9533
-0.0012455	2.5429	4.1135	3.5633	4.892	2.8	3.1813	3.4841	3.9533
-0.0011956	2.5429	4.0982	3.5344	4.8859	2.8	3.1813	3.4887	3.9533
-0.0011458	2.5383	4.0898	3.5282	4.8767	2.7946	3.189	3.4887	3.9533
-0.001096	2.5375	4.0883	3.5221	4.866	2.7817	3.192	3.4887	3.9533
-0.0010462	2.5299	4.0738	3.5176	4.8615	2.774	3.1943	3.4841	3.9533
-0.00099636	2.5276	4.054	3.5084	4.8599	2.7718	3.1905	3.4811	3.9517
-0.00094655	2.5261	4.0387	3.4962	4.8538	2.7649	3.1905	3.4811	3.935
-0.00089673	2.5261	4.0273	3.4916	4.8309	2.7649	3.1905	3.4811	3.9258
-0.00084691	2.5261	4.015	3.4825	4.8126	2.7649	3.1905	3.4811	3.9258
-0.00079709	2.5208	4.015	3.4672	4.8019	2.7641	3.1905	3.4811	3.9258
-0.00074727	2.5116	4.0105	3.4565	4.7943	2.7611	3.1905	3.4796	3.9258
-0.00069745	2.4994	4.0021	3.4565	4.7867	2.7504	3.189	3.4765	3.9182
-0.00064764	2.4849	3.9998	3.4535	4.7775	2.7405	3.189	3.4674	3.9182
-0.00059782	2.4773	3.9883	3.452	4.7714	2.7229	3.1821	3.4567	3.8983
-0.000548	2.4719	3.9807	3.4352	4.7592	2.7039	3.1653	3.4475	3.8861
-0.00049818	2.4643	3.9738	3.4138	4.7424	2.6878	3.1478	3.4475	3.8739
-0.00044836	2.4559	3.9632	3.4077	4.7318	2.6772	3.1447	3.4475	3.8648
-0.00039855	2.4422	3.9487	3.3894	4.7272	2.6749	3.1409	3.4475	3.8587
[truncated: 26,102 more rows]

## Sheet: Fig2-S1A2
16.066	9.1466
4.9925	4.0736

## Sheet: Fig2-S1B
-0.099985	NaN	NaN	NaN	NaN	NaN	NaN
-0.099935	NaN	NaN	NaN	NaN	NaN	NaN
-0.099885	NaN	NaN	NaN	NaN	NaN	NaN
-0.099836	NaN	NaN	NaN	NaN	NaN	NaN
-0.099786	NaN	NaN	NaN	NaN	NaN	NaN
-0.099736	NaN	NaN	NaN	NaN	NaN	NaN
-0.099686	NaN	NaN	NaN	NaN	NaN	NaN
-0.099636	NaN	NaN	NaN	NaN	NaN	NaN
-0.099587	NaN	NaN	NaN	NaN	NaN	NaN
-0.099537	NaN	NaN	NaN	NaN	NaN	NaN
-0.099487	NaN	NaN	NaN	NaN	NaN	NaN
-0.099437	NaN	NaN	NaN	NaN	NaN	NaN
-0.099387	NaN	NaN	NaN	NaN	NaN	NaN
-0.099337	NaN	NaN	NaN	NaN	NaN	NaN
-0.099288	NaN	NaN	NaN	NaN	NaN	NaN
-0.099238	NaN	NaN	NaN	NaN	NaN	NaN
-0.099188	NaN	NaN	NaN	NaN	NaN	NaN
-0.099138	NaN	NaN	NaN	NaN	NaN	NaN
-0.099088	NaN	NaN	NaN	NaN	NaN	NaN
-0.099039	NaN	NaN	NaN	NaN	NaN	NaN
-0.098989	NaN	NaN	NaN	NaN	NaN	NaN
-0.098939	NaN	NaN	NaN	NaN	NaN	NaN
-0.098889	NaN	NaN	NaN	NaN	NaN	NaN
-0.098839	NaN	NaN	NaN	NaN	NaN	NaN
-0.098789	NaN	NaN	NaN	NaN	NaN	NaN
-0.09874	NaN	NaN	NaN	NaN	NaN	NaN
-0.09869	NaN	NaN	NaN	NaN	NaN	NaN
-0.09864	NaN	NaN	NaN	NaN	NaN	NaN
-0.09859	NaN	NaN	NaN	NaN	NaN	NaN
-0.09854	NaN	NaN	NaN	NaN	NaN	NaN
-0.098491	NaN	NaN	NaN	NaN	NaN	NaN
-0.098441	NaN	NaN	NaN	NaN	NaN	NaN
-0.098391	NaN	NaN	NaN	NaN	NaN	NaN
-0.098341	NaN	NaN	NaN	NaN	NaN	NaN
-0.098291	NaN	NaN	NaN	NaN	NaN	NaN
-0.098241	NaN	NaN	NaN	NaN	NaN	NaN
-0.098192	NaN	NaN	NaN	NaN	NaN	NaN
-0.098142	NaN	NaN	NaN	NaN	NaN	NaN
-0.098092	NaN	NaN	NaN	NaN	NaN	NaN
-0.098042	NaN	NaN	NaN	NaN	NaN	NaN
-0.097992	NaN	NaN	NaN	NaN	NaN	NaN
-0.097943	NaN	NaN	NaN	NaN	NaN	NaN
-0.097893	NaN	NaN	NaN	NaN	NaN	NaN
-0.097843	NaN	NaN	NaN	NaN	NaN	NaN
-0.097793	NaN	NaN	NaN	NaN	NaN	NaN
-0.097743	NaN	NaN	NaN	NaN	NaN	NaN
-0.097693	NaN	NaN	NaN	NaN	NaN	NaN
-0.097644	NaN	NaN	NaN	NaN	NaN	NaN
-0.097594	NaN	NaN	NaN	NaN	NaN	NaN
-0.097544	NaN	NaN	NaN	NaN	NaN	NaN
-0.097494	NaN	NaN	NaN	NaN	NaN	NaN
-0.097444	NaN	NaN	NaN	NaN	NaN	NaN
-0.097395	NaN	NaN	NaN	NaN	NaN	NaN
-0.097345	NaN	NaN	NaN	NaN	NaN	NaN
-0.097295	NaN	NaN	NaN	NaN	NaN	NaN
-0.097245	NaN	NaN	NaN	NaN	NaN	NaN
-0.097195	NaN	NaN	NaN	NaN	NaN	NaN
-0.097145	NaN	NaN	NaN	NaN	NaN	NaN
-0.097096	NaN	NaN	NaN	NaN	NaN	NaN
-0.097046	NaN	NaN	NaN	NaN	NaN	NaN
-0.096996	NaN	NaN	NaN	NaN	NaN	NaN
-0.096946	NaN	NaN	NaN	NaN	NaN	NaN
-0.096896	NaN	NaN	NaN	NaN	NaN	NaN
-0.096847	NaN	NaN	NaN	NaN	NaN	NaN
-0.096797	NaN	NaN	NaN	NaN	NaN	NaN
-0.096747	NaN	NaN	NaN	NaN	NaN	NaN
-0.096697	NaN	NaN	NaN	NaN	NaN	NaN
-0.096647	NaN	NaN	NaN	NaN	NaN	NaN
-0.096597	NaN	NaN	NaN	NaN	NaN	NaN
-0.096548	NaN	NaN	NaN	NaN	NaN	NaN
-0.096498	NaN	NaN	NaN	NaN	NaN	NaN
-0.096448	NaN	NaN	NaN	NaN	NaN	NaN
-0.096398	NaN	NaN	NaN	NaN	NaN	NaN
-0.096348	NaN	NaN	NaN	NaN	NaN	NaN
-0.096299	NaN	NaN	NaN	NaN	NaN	NaN
-0.096249	NaN	NaN	NaN	NaN	NaN	NaN
-0.096199	NaN	NaN	NaN	NaN	NaN	NaN
-0.096149	NaN	NaN	NaN	NaN	NaN	NaN
-0.096099	NaN	NaN	NaN	NaN	NaN	NaN
-0.096049	NaN	NaN	NaN	NaN	NaN	NaN
-0.096	NaN	NaN	NaN	NaN	NaN	NaN
-0.09595	NaN	NaN	NaN	NaN	NaN	NaN
-0.0959	NaN	NaN	NaN	NaN	NaN	NaN
-0.09585	NaN	NaN	NaN	NaN	NaN	NaN
-0.0958	NaN	NaN	NaN	NaN	NaN	NaN
-0.095751	NaN	NaN	NaN	NaN	NaN	NaN
-0.095701	NaN	NaN	NaN	NaN	NaN	NaN
-0.095651	NaN	NaN	NaN	NaN	NaN	NaN
-0.095601	NaN	NaN	NaN	NaN	NaN	NaN
-0.095551	NaN	NaN	NaN	NaN	NaN	NaN
-0.095501	NaN	NaN	NaN	NaN	NaN	NaN
-0.095452	NaN	NaN	NaN	NaN	NaN	NaN
-0.095402	NaN	NaN	NaN	NaN	NaN	NaN
-0.095352	NaN	NaN	NaN	NaN	NaN	NaN
-0.095302	NaN	NaN	NaN	NaN	NaN	NaN
-0.095252	NaN	NaN	NaN	NaN	NaN	NaN
-0.095203	NaN	NaN	NaN	NaN	NaN	NaN
-0.095153	NaN	NaN	NaN	NaN	NaN	NaN
-0.095103	NaN	NaN	NaN	NaN	NaN	NaN
-0.095053	NaN	NaN	NaN	NaN	NaN	NaN
-0.095003	NaN	NaN	NaN	NaN	NaN	NaN
-0.094953	NaN	NaN	NaN	NaN	NaN	NaN
-0.094904	NaN	NaN	NaN	NaN	NaN	NaN
-0.094854	NaN	NaN	NaN	NaN	NaN	NaN
-0.094804	NaN	NaN	NaN	NaN	NaN	NaN
-0.094754	NaN	NaN	NaN	NaN	NaN	NaN
-0.094704	NaN	NaN	NaN	NaN	NaN	NaN
-0.094655	NaN	NaN	NaN	NaN	NaN	NaN
-0.094605	NaN	NaN	NaN	NaN	NaN	NaN
-0.094555	NaN	NaN	NaN	NaN	NaN	NaN
-0.094505	NaN	NaN	NaN	NaN	NaN	NaN
-0.094455	NaN	NaN	NaN	NaN	NaN	NaN
-0.094405	NaN	NaN	NaN	NaN	NaN	NaN
-0.094356	NaN	NaN	NaN	NaN	NaN	NaN
-0.094306	NaN	NaN	NaN	NaN	NaN	NaN
-0.094256	NaN	NaN	NaN	NaN	NaN	NaN
-0.094206	NaN	NaN	NaN	NaN	NaN	NaN
-0.094156	NaN	NaN	NaN	NaN	NaN	NaN
-0.094107	NaN	NaN	NaN	NaN	NaN	NaN
-0.094057	NaN	NaN	NaN	NaN	NaN	NaN
-0.094007	NaN	NaN	NaN	NaN	NaN	NaN
-0.093957	NaN	NaN	NaN	NaN	NaN	NaN
-0.093907	NaN	NaN	NaN	NaN	NaN	NaN
-0.093857	NaN	NaN	NaN	NaN	NaN	NaN
-0.093808	NaN	NaN	NaN	NaN	NaN	NaN
-0.093758	NaN	NaN	NaN	NaN	NaN	NaN
-0.093708	NaN	NaN	NaN	NaN	NaN	NaN
-0.093658	NaN	NaN	NaN	NaN	NaN	NaN
-0.093608	NaN	NaN	NaN	NaN	NaN	NaN
-0.093559	NaN	NaN	NaN	NaN	NaN	NaN
-0.093509	NaN	NaN	NaN	NaN	NaN	NaN
-0.093459	NaN	NaN	NaN	NaN	NaN	NaN
-0.093409	NaN	NaN	NaN	NaN	NaN	NaN
-0.093359	NaN	NaN	NaN	NaN	NaN	NaN
-0.093309	NaN	NaN	NaN	NaN	NaN	NaN
-0.09326	NaN	NaN	NaN	NaN	NaN	NaN
-0.09321	NaN	NaN	NaN	NaN	NaN	NaN
-0.09316	NaN	NaN	NaN	NaN	NaN	NaN
-0.09311	NaN	NaN	NaN	NaN	NaN	NaN
-0.09306	NaN	NaN	NaN	NaN	NaN	NaN
-0.093011	NaN	NaN	NaN	NaN	NaN	NaN
-0.092961	NaN	NaN	NaN	NaN	NaN	NaN
-0.092911	NaN	NaN	NaN	NaN	NaN	NaN
-0.092861	NaN	NaN	NaN	NaN	NaN	NaN
-0.092811	NaN	NaN	NaN	NaN	NaN	NaN
-0.092761	NaN	NaN	NaN	NaN	NaN	NaN
-0.092712	NaN	NaN	NaN	NaN	NaN	NaN
-0.092662	NaN	NaN	NaN	NaN	NaN	NaN
-0.092612	NaN	NaN	NaN	NaN	NaN	NaN
-0.092562	NaN	NaN	NaN	NaN	NaN	NaN
-0.092512	NaN	NaN	NaN	NaN	NaN	NaN
-0.092463	NaN	NaN	NaN	NaN	NaN	NaN
-0.092413	NaN	NaN	NaN	NaN	NaN	NaN
-0.092363	NaN	NaN	NaN	NaN	NaN	NaN
-0.092313	NaN	NaN	NaN	NaN	NaN	NaN
-0.092263	NaN	NaN	NaN	NaN	NaN	NaN
-0.092213	NaN	NaN	NaN	NaN	NaN	NaN
-0.092164	NaN	NaN	NaN	NaN	NaN	NaN
-0.092114	NaN	NaN	NaN	NaN	NaN	NaN
-0.092064	NaN	NaN	NaN	NaN	NaN	NaN
-0.092014	NaN	NaN	NaN	NaN	NaN	NaN
-0.091964	NaN	NaN	NaN	NaN	NaN	NaN
-0.091915	NaN	NaN	NaN	NaN	NaN	NaN
-0.091865	NaN	NaN	NaN	NaN	NaN	NaN
-0.091815	NaN	NaN	NaN	NaN	NaN	NaN
-0.091765	NaN	NaN	NaN	NaN	NaN	NaN
-0.091715	NaN	NaN	NaN	NaN	NaN	NaN
-0.091665	NaN	NaN	NaN	NaN	NaN	NaN
-0.091616	NaN	NaN	NaN	NaN	NaN	NaN
-0.091566	NaN	NaN	NaN	NaN	NaN	NaN
-0.091516	NaN	NaN	NaN	NaN	NaN	NaN
-0.091466	NaN	NaN	NaN	NaN	NaN	NaN
-0.091416	NaN	NaN	NaN	NaN	NaN	NaN
-0.091367	NaN	NaN	NaN	NaN	NaN	NaN
-0.091317	NaN	NaN	NaN	NaN	NaN	NaN
-0.091267	NaN	NaN	NaN	NaN	NaN	NaN
-0.091217	NaN	NaN	NaN	NaN	NaN	NaN
-0.091167	NaN	NaN	NaN	NaN	NaN	NaN
-0.091117	NaN	NaN	NaN	NaN	NaN	NaN
-0.091068	NaN	NaN	NaN	NaN	NaN	NaN
-0.091018	NaN	NaN	NaN	NaN	NaN	NaN
-0.090968	NaN	NaN	NaN	NaN	NaN	NaN
-0.090918	NaN	NaN	NaN	NaN	NaN	NaN
-0.090868	NaN	NaN	NaN	NaN	NaN	NaN
-0.090819	NaN	NaN	NaN	NaN	NaN	NaN
-0.090769	NaN	NaN	NaN	NaN	NaN	NaN
-0.090719	NaN	NaN	NaN	NaN	NaN	NaN
-0.090669	NaN	NaN	NaN	NaN	NaN	NaN
-0.090619	NaN	NaN	NaN	NaN	NaN	NaN
-0.090569	NaN	NaN	NaN	NaN	NaN	NaN
-0.09052	NaN	NaN	NaN	NaN	NaN	NaN
-0.09047	NaN	NaN	NaN	NaN	NaN	NaN
-0.09042	NaN	NaN	NaN	NaN	NaN	NaN
-0.09037	NaN	NaN	NaN	NaN	NaN	NaN
-0.09032	NaN	NaN	NaN	NaN	NaN	NaN
-0.090271	NaN	NaN	NaN	NaN	NaN	NaN
-0.090221	NaN	NaN	NaN	NaN	NaN	NaN
-0.090171	NaN	NaN	NaN	NaN	NaN	NaN
-0.090121	NaN	NaN	NaN	NaN	NaN	NaN
-0.090071	NaN	NaN	NaN	NaN	NaN	NaN
-0.090021	NaN	NaN	NaN	NaN	NaN	NaN
-0.089972	NaN	NaN	NaN	NaN	NaN	NaN
-0.089922	NaN	NaN	NaN	NaN	NaN	NaN
-0.089872	NaN	NaN	NaN	NaN	NaN	NaN
-0.089822	NaN	NaN	NaN	NaN	NaN	NaN
-0.089772	NaN	NaN	NaN	NaN	NaN	NaN
-0.089723	NaN	NaN	NaN	NaN	NaN	NaN
-0.089673	NaN	NaN	NaN	NaN	NaN	NaN
-0.089623	NaN	NaN	NaN	NaN	NaN	NaN
-0.089573	NaN	NaN	NaN	NaN	NaN	NaN
-0.089523	NaN	NaN	NaN	NaN	NaN	NaN
-0.089473	NaN	NaN	NaN	NaN	NaN	NaN
-0.089424	NaN	NaN	NaN	NaN	NaN	NaN
-0.089374	NaN	NaN	NaN	NaN	NaN	NaN
-0.089324	NaN	NaN	NaN	NaN	NaN	NaN
-0.089274	NaN	NaN	NaN	NaN	NaN	NaN
-0.089224	NaN	NaN	NaN	NaN	NaN	NaN
-0.089175	NaN	NaN	NaN	NaN	NaN	NaN
-0.089125	NaN	NaN	NaN	NaN	NaN	NaN
-0.089075	NaN	NaN	NaN	NaN	NaN	NaN
-0.089025	NaN	NaN	NaN	NaN	NaN	NaN
-0.088975	NaN	NaN	NaN	NaN	NaN	NaN
-0.088925	NaN	NaN	NaN	NaN	NaN	NaN
-0.088876	NaN	NaN	NaN	NaN	NaN	NaN
-0.088826	NaN	NaN	NaN	NaN	NaN	NaN
-0.088776	NaN	NaN	NaN	NaN	NaN	NaN
-0.088726	NaN	NaN	NaN	NaN	NaN	NaN
-0.088676	NaN	NaN	NaN	NaN	NaN	NaN
-0.088627	NaN	NaN	NaN	NaN	NaN	NaN
-0.088577	NaN	NaN	NaN	NaN	NaN	NaN
-0.088527	NaN	NaN	NaN	NaN	NaN	NaN
-0.088477	NaN	NaN	NaN	NaN	NaN	NaN
-0.088427	NaN	NaN	NaN	NaN	NaN	NaN
-0.088377	NaN	NaN	NaN	NaN	NaN	NaN
-0.088328	NaN	NaN	NaN	NaN	NaN	NaN
-0.088278	NaN	NaN	NaN	NaN	NaN	NaN
-0.088228	NaN	NaN	NaN	NaN	NaN	NaN
-0.088178	NaN	NaN	NaN	NaN	NaN	NaN
-0.088128	NaN	NaN	NaN	NaN	NaN	NaN
-0.088079	NaN	NaN	NaN	NaN	NaN	NaN
-0.088029	NaN	NaN	NaN	NaN	NaN	NaN
-0.087979	NaN	NaN	NaN	NaN	NaN	NaN
-0.087929	NaN	NaN	NaN	NaN	NaN	NaN
-0.087879	NaN	NaN	NaN	NaN	NaN	NaN
-0.087829	NaN	NaN	NaN	NaN	NaN	NaN
-0.08778	NaN	NaN	NaN	NaN	NaN	NaN
-0.08773	NaN	NaN	NaN	NaN	NaN	NaN
-0.08768	NaN	NaN	NaN	NaN	NaN	NaN
-0.08763	NaN	NaN	NaN	NaN	NaN	NaN
-0.08758	NaN	NaN	NaN	NaN	NaN	NaN
-0.087531	NaN	NaN	NaN	NaN	NaN	NaN
-0.087481	NaN	NaN	NaN	NaN	NaN	NaN
-0.087431	NaN	NaN	NaN	NaN	NaN	NaN
-0.087381	NaN	NaN	NaN	NaN	NaN	NaN
-0.087331	NaN	NaN	NaN	NaN	NaN	NaN
-0.087281	NaN	NaN	NaN	NaN	NaN	NaN
-0.087232	NaN	NaN	NaN	NaN	NaN	NaN
-0.087182	NaN	NaN	NaN	NaN	NaN	NaN
-0.087132	NaN	NaN	NaN	NaN	NaN	NaN
-0.087082	NaN	NaN	NaN	NaN	NaN	NaN
-0.087032	NaN	NaN	NaN	NaN	NaN	NaN
-0.086983	NaN	NaN	NaN	NaN	NaN	NaN
-0.086933	NaN	NaN	NaN	NaN	NaN	NaN
-0.086883	NaN	NaN	NaN	NaN	NaN	NaN
-0.086833	NaN	NaN	NaN	NaN	NaN	NaN
-0.086783	NaN	NaN	NaN	NaN	NaN	NaN
-0.086733	NaN	NaN	NaN	NaN	NaN	NaN
-0.086684	NaN	NaN	NaN	NaN	NaN	NaN
-0.086634	NaN	NaN	NaN	NaN	NaN	NaN
-0.086584	NaN	NaN	NaN	NaN	NaN	NaN
-0.086534	NaN	NaN	NaN	NaN	NaN	NaN
-0.086484	NaN	NaN	NaN	NaN	NaN	NaN
-0.086435	NaN	NaN	NaN	NaN	NaN	NaN
-0.086385	NaN	NaN	NaN	NaN	NaN	NaN
-0.086335	NaN	NaN	NaN	NaN	NaN	NaN
-0.086285	NaN	NaN	NaN	NaN	NaN	NaN
-0.086235	NaN	NaN	NaN	NaN	NaN	NaN
-0.086185	NaN	NaN	NaN	NaN	NaN	NaN
-0.086136	NaN	NaN	NaN	NaN	NaN	NaN
-0.086086	NaN	NaN	NaN	NaN	NaN	NaN
-0.086036	NaN	NaN	NaN	NaN	NaN	NaN
-0.085986	NaN	NaN	NaN	NaN	NaN	NaN
-0.085936	NaN	NaN	NaN	NaN	NaN	NaN
-0.085887	NaN	NaN	NaN	NaN	NaN	NaN
-0.085837	NaN	NaN	NaN	NaN	NaN	NaN
-0.085787	NaN	NaN	NaN	NaN	NaN	NaN
-0.085737	NaN	NaN	NaN	NaN	NaN	NaN
-0.085687	NaN	NaN	NaN	NaN	NaN	NaN
-0.085637	NaN	NaN	NaN	NaN	NaN	NaN
-0.085588	NaN	NaN	NaN	NaN	NaN	NaN
-0.085538	NaN	NaN	NaN	NaN	NaN	NaN
-0.085488	NaN	NaN	NaN	NaN	NaN	NaN
-0.085438	NaN	NaN	NaN	NaN	NaN	NaN
-0.085388	NaN	NaN	NaN	NaN	NaN	NaN
-0.085339	NaN	NaN	NaN	NaN	NaN	NaN
-0.085289	NaN	NaN	NaN	NaN	NaN	NaN
-0.085239	NaN	NaN	NaN	NaN	NaN	NaN
-0.085189	NaN	NaN	NaN	NaN	NaN	NaN
-0.085139	NaN	NaN	NaN	NaN	NaN	NaN
-0.085089	NaN	NaN	NaN	NaN	NaN	NaN
-0.08504	NaN	NaN	NaN	NaN	NaN	NaN
-0.08499	NaN	NaN	NaN	NaN	NaN	NaN
-0.08494	NaN	NaN	NaN	NaN	NaN	NaN
-0.08489	NaN	NaN	NaN	NaN	NaN	NaN
-0.08484	NaN	NaN	NaN	NaN	NaN	NaN
-0.084791	NaN	NaN	NaN	NaN	NaN	NaN
-0.084741	NaN	NaN	NaN	NaN	NaN	NaN
-0.084691	NaN	NaN	NaN	NaN	NaN	NaN
-0.084641	NaN	NaN	NaN	NaN	NaN	NaN
-0.084591	NaN	NaN	NaN	NaN	NaN	NaN
-0.084541	NaN	NaN	NaN	NaN	NaN	NaN
-0.084492	NaN	NaN	NaN	NaN	NaN	NaN
-0.084442	NaN	NaN	NaN	NaN	NaN	NaN
-0.084392	NaN	NaN	NaN	NaN	NaN	NaN
-0.084342	NaN	NaN	NaN	NaN	NaN	NaN
-0.084292	NaN	NaN	NaN	NaN	NaN	NaN
-0.084243	NaN	NaN	NaN	NaN	NaN	NaN
-0.084193	NaN	NaN	NaN	NaN	NaN	NaN
-0.084143	NaN	NaN	NaN	NaN	NaN	NaN
-0.084093	NaN	NaN	NaN	NaN	NaN	NaN
-0.084043	NaN	NaN	NaN	NaN	NaN	NaN
-0.083993	NaN	NaN	NaN	NaN	NaN	NaN
-0.083944	NaN	NaN	NaN	NaN	NaN	NaN
-0.083894	NaN	NaN	NaN	NaN	NaN	NaN
-0.083844	NaN	NaN	NaN	NaN	NaN	NaN
-0.083794	NaN	NaN	NaN	NaN	NaN	NaN
-0.083744	NaN	NaN	NaN	NaN	NaN	NaN
-0.083695	NaN	NaN	NaN	NaN	NaN	NaN
-0.083645	NaN	NaN	NaN	NaN	NaN	NaN
-0.083595	NaN	NaN	NaN	NaN	NaN	NaN
-0.083545	NaN	NaN	NaN	NaN	NaN	NaN
-0.083495	NaN	NaN	NaN	NaN	NaN	NaN
-0.083445	NaN	NaN	NaN	NaN	NaN	NaN
-0.083396	NaN	NaN	NaN	NaN	NaN	NaN
-0.083346	NaN	NaN	NaN	NaN	NaN	NaN
-0.083296	NaN	NaN	NaN	NaN	NaN	NaN
-0.083246	NaN	NaN	NaN	NaN	NaN	NaN
-0.083196	NaN	NaN	NaN	NaN	NaN	NaN
-0.083147	NaN	NaN	NaN	NaN	NaN	NaN
-0.083097	NaN	NaN	NaN	NaN	NaN	NaN
-0.083047	NaN	NaN	NaN	NaN	NaN	NaN
-0.082997	NaN	NaN	NaN	NaN	NaN	NaN
-0.082947	NaN	NaN	NaN	NaN	NaN	NaN
-0.082897	NaN	NaN	NaN	NaN	NaN	NaN
-0.082848	NaN	NaN	NaN	NaN	NaN	NaN
-0.082798	NaN	NaN	NaN	NaN	NaN	NaN
-0.082748	NaN	NaN	NaN	NaN	NaN	NaN
-0.082698	NaN	NaN	NaN	NaN	NaN	NaN
-0.082648	NaN	NaN	NaN	NaN	NaN	NaN
-0.082599	NaN	NaN	NaN	NaN	NaN	NaN
-0.082549	NaN	NaN	NaN	NaN	NaN	NaN
-0.082499	NaN	NaN	NaN	NaN	NaN	NaN
-0.082449	NaN	NaN	NaN	NaN	NaN	NaN
-0.082399	NaN	NaN	NaN	NaN	NaN	NaN
-0.082349	NaN	NaN	NaN	NaN	NaN	NaN
-0.0823	NaN	NaN	NaN	NaN	NaN	NaN
-0.08225	NaN	NaN	NaN	NaN	NaN	NaN
-0.0822	NaN	NaN	NaN	NaN	NaN	NaN
-0.08215	NaN	NaN	NaN	NaN	NaN	NaN
-0.0821	NaN	NaN	NaN	NaN	NaN	NaN
-0.082051	NaN	NaN	NaN	NaN	NaN	NaN
-0.082001	NaN	NaN	NaN	NaN	NaN	NaN
-0.081951	NaN	NaN	NaN	NaN	NaN	NaN
-0.081901	NaN	NaN	NaN	NaN	NaN	NaN
-0.081851	NaN	NaN	NaN	NaN	NaN	NaN
-0.081801	NaN	NaN	NaN	NaN	NaN	NaN
-0.081752	NaN	NaN	NaN	NaN	NaN	NaN
-0.081702	NaN	NaN	NaN	NaN	NaN	NaN
-0.081652	NaN	NaN	NaN	NaN	NaN	NaN
-0.081602	NaN	NaN	NaN	NaN	NaN	NaN
-0.081552	NaN	NaN	NaN	NaN	NaN	NaN
-0.081503	NaN	NaN	NaN	NaN	NaN	NaN
-0.081453	NaN	NaN	NaN	NaN	NaN	NaN
-0.081403	NaN	NaN	NaN	NaN	NaN	NaN
-0.081353	NaN	NaN	NaN	NaN	NaN	NaN
-0.081303	NaN	NaN	NaN	NaN	NaN	NaN
-0.081253	NaN	NaN	NaN	NaN	NaN	NaN
-0.081204	NaN	NaN	NaN	NaN	NaN	NaN
-0.081154	NaN	NaN	NaN	NaN	NaN	NaN
-0.081104	NaN	NaN	NaN	NaN	NaN	NaN
-0.081054	NaN	NaN	NaN	NaN	NaN	NaN
-0.081004	NaN	NaN	NaN	NaN	NaN	NaN
-0.080955	NaN	NaN	NaN	NaN	NaN	NaN
-0.080905	NaN	NaN	NaN	NaN	NaN	NaN
-0.080855	NaN	NaN	NaN	NaN	NaN	NaN
-0.080805	NaN	NaN	NaN	NaN	NaN	NaN
-0.080755	NaN	NaN	NaN	NaN	NaN	NaN
-0.080705	NaN	NaN	NaN	NaN	NaN	NaN
-0.080656	NaN	NaN	NaN	NaN	NaN	NaN
-0.080606	NaN	NaN	NaN	NaN	NaN	NaN
-0.080556	NaN	NaN	NaN	NaN	NaN	NaN
-0.080506	NaN	NaN	NaN	NaN	NaN	NaN
-0.080456	NaN	NaN	NaN	NaN	NaN	NaN
-0.080407	NaN	NaN	NaN	NaN	NaN	NaN
-0.080357	NaN	NaN	NaN	NaN	NaN	NaN
-0.080307	NaN	NaN	NaN	NaN	NaN	NaN
-0.080257	NaN	NaN	NaN	NaN	NaN	NaN
-0.080207	NaN	NaN	NaN	NaN	NaN	NaN
-0.080157	NaN	NaN	NaN	NaN	NaN	NaN
-0.080108	NaN	NaN	NaN	NaN	NaN	NaN
-0.080058	NaN	NaN	NaN	NaN	NaN	NaN
-0.080008	NaN	NaN	NaN	NaN	NaN	NaN
-0.079958	NaN	NaN	NaN	NaN	NaN	NaN
-0.079908	NaN	NaN	NaN	NaN	NaN	NaN
-0.079859	NaN	NaN	NaN	NaN	NaN	NaN
-0.079809	NaN	NaN	NaN	NaN	NaN	NaN
-0.079759	NaN	NaN	NaN	NaN	NaN	NaN
-0.079709	NaN	NaN	NaN	NaN	NaN	NaN
-0.079659	NaN	NaN	NaN	NaN	NaN	NaN
-0.079609	NaN	NaN	NaN	NaN	NaN	NaN
-0.07956	NaN	NaN	NaN	NaN	NaN	NaN
-0.07951	NaN	NaN	NaN	NaN	NaN	NaN
-0.07946	NaN	NaN	NaN	NaN	NaN	NaN
-0.07941	NaN	NaN	NaN	NaN	NaN	NaN
-0.07936	NaN	NaN	NaN	NaN	NaN	NaN
-0.079311	NaN	NaN	NaN	NaN	NaN	NaN
-0.079261	NaN	NaN	NaN	NaN	NaN	NaN
-0.079211	NaN	NaN	NaN	NaN	NaN	NaN
-0.079161	NaN	NaN	NaN	NaN	NaN	NaN
-0.079111	NaN	NaN	NaN	NaN	NaN	NaN
-0.079061	NaN	NaN	NaN	NaN	NaN	NaN
-0.079012	NaN	NaN	NaN	NaN	NaN	NaN
-0.078962	NaN	NaN	NaN	NaN	NaN	NaN
-0.078912	NaN	NaN	NaN	NaN	NaN	NaN
-0.078862	NaN	NaN	NaN	NaN	NaN	NaN
-0.078812	NaN	NaN	NaN	NaN	NaN	NaN
-0.078763	NaN	NaN	NaN	NaN	NaN	NaN
-0.078713	NaN	NaN	NaN	NaN	NaN	NaN
-0.078663	NaN	NaN	NaN	NaN	NaN	NaN
-0.078613	NaN	NaN	NaN	NaN	NaN	NaN
-0.078563	NaN	NaN	NaN	NaN	NaN	NaN
-0.078513	NaN	NaN	NaN	NaN	NaN	NaN
-0.078464	NaN	NaN	NaN	NaN	NaN	NaN
-0.078414	NaN	NaN	NaN	NaN	NaN	NaN
-0.078364	NaN	NaN	NaN	NaN	NaN	NaN
-0.078314	NaN	NaN	NaN	NaN	NaN	NaN
-0.078264	NaN	NaN	NaN	NaN	NaN	NaN
-0.078215	NaN	NaN	NaN	NaN	NaN	NaN
-0.078165	NaN	NaN	NaN	NaN	NaN	NaN
-0.078115	NaN	NaN	NaN	NaN	NaN	NaN
-0.078065	NaN	NaN	NaN	NaN	NaN	NaN
-0.078015	NaN	NaN	NaN	NaN	NaN	NaN
-0.077965	NaN	NaN	NaN	NaN	NaN	NaN
-0.077916	NaN	NaN	NaN	NaN	NaN	NaN
-0.077866	NaN	NaN	NaN	NaN	NaN	NaN
-0.077816	NaN	NaN	NaN	NaN	NaN	NaN
-0.077766	NaN	NaN	NaN	NaN	NaN	NaN
-0.077716	NaN	NaN	NaN	NaN	NaN	NaN
-0.077667	NaN	NaN	NaN	NaN	NaN	NaN
-0.077617	NaN	NaN	NaN	NaN	NaN	NaN
-0.077567	NaN	NaN	NaN	NaN	NaN	NaN
-0.077517	NaN	NaN	NaN	NaN	NaN	NaN
-0.077467	NaN	NaN	NaN	NaN	NaN	NaN
-0.077417	NaN	NaN	NaN	NaN	NaN	NaN
-0.077368	NaN	NaN	NaN	NaN	NaN	NaN
-0.077318	NaN	NaN	NaN	NaN	NaN	NaN
-0.077268	NaN	NaN	NaN	NaN	NaN	NaN
-0.077218	NaN	NaN	NaN	NaN	NaN	NaN
-0.077168	NaN	NaN	NaN	NaN	NaN	NaN
-0.077119	NaN	NaN	NaN	NaN	NaN	NaN
-0.077069	NaN	NaN	NaN	NaN	NaN	NaN
-0.077019	NaN	NaN	NaN	NaN	NaN	NaN
-0.076969	NaN	NaN	NaN	NaN	NaN	NaN
-0.076919	NaN	NaN	NaN	NaN	NaN	NaN
-0.076869	NaN	NaN	NaN	NaN	NaN	NaN
-0.07682	NaN	NaN	NaN	NaN	NaN	NaN
-0.07677	NaN	NaN	NaN	NaN	NaN	NaN
-0.07672	NaN	NaN	NaN	NaN	NaN	NaN
-0.07667	NaN	NaN	NaN	NaN	NaN	NaN
-0.07662	NaN	NaN	NaN	NaN	NaN	NaN
-0.076571	NaN	NaN	NaN	NaN	NaN	NaN
-0.076521	NaN	NaN	NaN	NaN	NaN	NaN
-0.076471	NaN	NaN	NaN	NaN	NaN	NaN
-0.076421	NaN	NaN	NaN	NaN	NaN	NaN
-0.076371	NaN	NaN	NaN	NaN	NaN	NaN
-0.076321	NaN	NaN	NaN	NaN	NaN	NaN
-0.076272	NaN	NaN	NaN	NaN	NaN	NaN
-0.076222	NaN	NaN	NaN	NaN	NaN	NaN
-0.076172	NaN	NaN	NaN	NaN	NaN	NaN
-0.076122	NaN	NaN	NaN	NaN	NaN	NaN
-0.076072	NaN	NaN	NaN	NaN	NaN	NaN
-0.076023	NaN	NaN	NaN	NaN	NaN	NaN
-0.075973	NaN	NaN	NaN	NaN	NaN	NaN
-0.075923	NaN	NaN	NaN	NaN	NaN	NaN
-0.075873	NaN	NaN	NaN	NaN	NaN	NaN
-0.075823	NaN	NaN	NaN	NaN	NaN	NaN
-0.075773	NaN	NaN	NaN	NaN	NaN	NaN
-0.075724	NaN	NaN	NaN	NaN	NaN	NaN
-0.075674	NaN	NaN	NaN	NaN	NaN	NaN
-0.075624	NaN	NaN	NaN	NaN	NaN	NaN
-0.075574	NaN	NaN	NaN	NaN	NaN	NaN
-0.075524	NaN	NaN	NaN	NaN	NaN	NaN
-0.075475	NaN	NaN	NaN	NaN	NaN	NaN
-0.075425	NaN	NaN	NaN	NaN	NaN	NaN
-0.075375	NaN	NaN	NaN	NaN	NaN	NaN
-0.075325	NaN	NaN	NaN	NaN	NaN	NaN
-0.075275	NaN	NaN	NaN	NaN	NaN	NaN
-0.075225	NaN	NaN	NaN	NaN	NaN	NaN
-0.075176	NaN	NaN	NaN	NaN	NaN	NaN
-0.075126	NaN	NaN	NaN	NaN	NaN	NaN
-0.075076	NaN	NaN	NaN	NaN	NaN	NaN
-0.075026	NaN	NaN	NaN	NaN	NaN	NaN
-0.074976	NaN	NaN	NaN	NaN	NaN	NaN
-0.074927	NaN	NaN	NaN	NaN	NaN	NaN
-0.074877	NaN	NaN	NaN	NaN	NaN	NaN
-0.074827	NaN	NaN	NaN	NaN	NaN	NaN
-0.074777	NaN	NaN	NaN	NaN	NaN	NaN
-0.074727	NaN	NaN	NaN	NaN	NaN	NaN
-0.074677	NaN	NaN	NaN	NaN	NaN	NaN
-0.074628	NaN	NaN	NaN	NaN	NaN	NaN
-0.074578	NaN	NaN	NaN	NaN	NaN	NaN
-0.074528	NaN	NaN	NaN	NaN	NaN	NaN
-0.074478	NaN	NaN	NaN	NaN	NaN	NaN
-0.074428	NaN	NaN	NaN	NaN	NaN	NaN
-0.074379	NaN	NaN	NaN	NaN	NaN	NaN
-0.074329	NaN	NaN	NaN	NaN	NaN	NaN
-0.074279	NaN	NaN	NaN	NaN	NaN	NaN
-0.074229	NaN	NaN	NaN	NaN	NaN	NaN
-0.074179	NaN	NaN	NaN	NaN	NaN	NaN
-0.074129	NaN	NaN	NaN	NaN	NaN	NaN
-0.07408	NaN	NaN	NaN	NaN	NaN	NaN
-0.07403	NaN	NaN	NaN	NaN	NaN	NaN
-0.07398	NaN	NaN	NaN	NaN	NaN	NaN
-0.07393	NaN	NaN	NaN	NaN	NaN	NaN
-0.07388	NaN	NaN	NaN	NaN	NaN	NaN
-0.073831	NaN	NaN	NaN	NaN	NaN	NaN
-0.073781	NaN	NaN	NaN	NaN	NaN	NaN
-0.073731	NaN	NaN	NaN	NaN	NaN	NaN
-0.073681	NaN	NaN	NaN	NaN	NaN	NaN
-0.073631	NaN	NaN	NaN	NaN	NaN	NaN
-0.073581	NaN	NaN	NaN	NaN	NaN	NaN
-0.073532	NaN	NaN	NaN	NaN	NaN	NaN
-0.073482	NaN	NaN	NaN	NaN	NaN	NaN
-0.073432	NaN	NaN	NaN	NaN	NaN	NaN
-0.073382	NaN	NaN	NaN	NaN	NaN	NaN
-0.073332	NaN	NaN	NaN	NaN	NaN	NaN
-0.073283	NaN	NaN	NaN	NaN	NaN	NaN
-0.073233	NaN	NaN	NaN	NaN	NaN	NaN
-0.073183	NaN	NaN	NaN	NaN	NaN	NaN
-0.073133	NaN	NaN	NaN	NaN	NaN	NaN
-0.073083	NaN	NaN	NaN	NaN	NaN	NaN
-0.073033	NaN	NaN	NaN	NaN	NaN	NaN
-0.072984	NaN	NaN	NaN	NaN	NaN	NaN
-0.072934	1.5737	1.6831	1.5051	NaN	NaN	NaN
-0.072884	1.5758	1.6686	1.5098	NaN	NaN	NaN
-0.072834	1.5766	1.6652	1.5081	NaN	NaN	NaN
-0.072784	1.5766	1.6652	1.5108	NaN	NaN	NaN
-0.072735	1.5766	1.6652	1.5133	NaN	NaN	NaN
-0.072685	1.5766	1.6686	1.5087	NaN	NaN	NaN
-0.072635	1.579	1.6686	1.5079	NaN	NaN	NaN
-0.072585	1.579	1.6652	1.5079	NaN	NaN	NaN
-0.072535	1.5807	1.6652	1.5159	NaN	NaN	NaN
-0.072485	1.5815	1.6633	1.519	NaN	NaN	NaN
-0.072436	1.579	1.6633	1.5219	NaN	NaN	NaN
-0.072386	1.584	1.6633	1.5262	NaN	NaN	NaN
-0.072336	1.584	1.6625	1.5289	NaN	NaN	NaN
-0.072286	1.5815	1.6602	1.5295	NaN	NaN	NaN
-0.072236	1.5798	1.6522	1.5352	NaN	NaN	NaN
-0.072187	1.5775	1.6457	1.5406	NaN	NaN	NaN
-0.072137	1.575	1.6446	1.543	NaN	NaN	NaN
-0.072087	1.5703	1.6446	1.5497	NaN	NaN	NaN
-0.072037	1.5727	1.6522	1.5608	NaN	NaN	NaN
-0.071987	1.5752	1.6602	1.5697	NaN	NaN	NaN
-0.071937	1.5775	1.6602	1.5638	NaN	NaN	NaN
-0.071888	1.58	1.6602	1.5716	NaN	NaN	NaN
-0.071838	1.5834	1.6602	1.5648	NaN	NaN	NaN
-0.071788	1.584	1.6522	1.5612	NaN	NaN	NaN
-0.071738	1.5865	1.6522	1.5629	NaN	NaN	NaN
-0.071688	1.5865	1.6522	1.5604	NaN	NaN	NaN
-0.071639	1.5844	1.6602	1.5619	NaN	NaN	NaN
-0.071589	1.5844	1.6602	1.557	NaN	NaN	NaN
-0.071539	1.5779	1.6625	1.5678	NaN	NaN	NaN
-0.071489	1.5699	1.6648	1.5753	NaN	NaN	NaN
-0.071439	1.5699	1.6816	1.5753	NaN	NaN	NaN
-0.071389	1.5699	1.6816	1.5753	NaN	NaN	NaN
-0.07134	1.5735	1.6816	1.5802	NaN	NaN	NaN
-0.07129	1.5664	1.6816	1.5772	NaN	NaN	NaN
-0.07124	1.5664	1.6816	1.5808	NaN	NaN	NaN
-0.07119	1.5655	1.6648	1.5869	NaN	NaN	NaN
-0.07114	1.564	1.6625	1.5928	NaN	NaN	NaN
-0.071091	1.5598	1.6625	1.5934	NaN	NaN	NaN
-0.071041	1.5615	1.6648	1.5934	NaN	NaN	NaN
-0.070991	1.5605	1.6816	1.5934	NaN	NaN	NaN
-0.070941	1.564	1.6648	1.5934	NaN	NaN	NaN
-0.070891	1.564	1.6625	1.5966	NaN	NaN	NaN
-0.070841	1.564	1.6625	1.5966	NaN	NaN	NaN
-0.070792	1.5664	1.6541	1.5989	NaN	NaN	NaN
-0.070742	1.5605	1.6545	1.6006	NaN	NaN	NaN
-0.070692	1.5569	1.6545	1.6027	NaN	NaN	NaN
-0.070642	1.5539	1.6545	1.601	NaN	NaN	NaN
-0.070592	1.5539	1.6545	1.5982	NaN	NaN	NaN
-0.070543	1.5518	1.6476	1.593	NaN	NaN	NaN
-0.070493	1.5491	1.6476	1.5888	NaN	NaN	NaN
-0.070443	1.5455	1.6713	1.5926	NaN	NaN	NaN
-0.070393	1.5455	1.6713	1.5888	NaN	NaN	NaN
-0.070343	1.5415	1.6763	1.5888	NaN	NaN	NaN
-0.070293	1.5405	1.6763	1.5888	NaN	NaN	NaN
-0.070244	1.5436	1.6763	1.5888	NaN	NaN	NaN
-0.070194	1.5447	1.6763	1.593	NaN	NaN	NaN
-0.070144	1.5413	1.6763	1.5982	NaN	NaN	NaN
-0.070094	1.5405	1.6976	1.5993	NaN	NaN	NaN
-0.070044	1.5405	1.6976	1.593	NaN	NaN	NaN
-0.069995	1.5413	1.7167	1.5838	NaN	NaN	NaN
-0.069945	1.5394	1.7167	1.5838	NaN	NaN	NaN
-0.069895	1.5346	1.7167	1.585	NaN	NaN	NaN
-0.069845	1.531	1.7182	1.585	NaN	NaN	NaN
-0.069795	1.5262	1.7182	1.588	NaN	NaN	NaN
-0.069745	1.5262	1.7182	1.5749	NaN	NaN	NaN
-0.069696	1.5273	1.719	1.569	NaN	NaN	NaN
-0.069646	1.5294	1.7201	1.5707	NaN	NaN	NaN
-0.069596	1.5271	1.7201	1.5707	NaN	NaN	NaN
-0.069546	1.522	1.7201	1.5707	NaN	NaN	NaN
-0.069496	1.522	1.7201	1.5804	NaN	NaN	NaN
-0.069447	1.5182	1.7201	1.5932	NaN	NaN	NaN
-0.069397	1.514	1.7201	1.6006	NaN	NaN	NaN
-0.069347	1.51	1.7201	1.5968	NaN	NaN	NaN
-0.069297	1.5073	1.706	1.6024	NaN	NaN	NaN
-0.069247	1.5054	1.7007	1.6073	NaN	NaN	NaN
-0.069197	1.5062	1.6965	1.6111	NaN	NaN	NaN
-0.069148	1.5062	1.6953	1.6149	NaN	NaN	NaN
-0.069098	1.5054	1.6927	1.6186	NaN	NaN	NaN
-0.069048	1.5062	1.6774	1.6147	NaN	NaN	NaN
-0.068998	1.5094	1.6637	1.6186	NaN	NaN	NaN
-0.068948	1.5079	1.6637	1.6186	NaN	NaN	NaN
-0.068899	1.5094	1.6583	1.6186	NaN	NaN	NaN
-0.068849	1.51	1.6515	1.6197	NaN	NaN	NaN
-0.068799	1.5117	1.6358	1.6216	NaN	NaN	NaN
-0.068749	1.5102	1.6358	1.6191	NaN	NaN	NaN
-0.068699	1.5125	1.6301	1.617	NaN	NaN	NaN
-0.068649	1.5146	1.6206	1.6149	NaN	NaN	NaN
-0.0686	1.5174	1.6164	1.6165	NaN	NaN	NaN
-0.06855	1.5146	1.6297	1.6367	NaN	NaN	NaN
-0.0685	1.5125	1.6324	1.6283	NaN	NaN	NaN
-0.06845	1.5107	1.6324	1.6111	NaN	NaN	NaN
-0.0684	1.5107	1.6324	1.6111	NaN	NaN	NaN
-0.068351	1.5132	1.6209	1.6134	NaN	NaN	NaN
-0.068301	1.5125	1.6087	1.6134	NaN	NaN	NaN
-0.068251	1.5106	1.6209	1.6125	NaN	NaN	NaN
-0.068201	1.5121	1.6324	1.6243	NaN	NaN	NaN
-0.068151	1.5146	1.6324	1.6252	NaN	NaN	NaN
-0.068101	1.5121	1.6324	1.6252	NaN	NaN	NaN
-0.068052	1.5138	1.6164	1.6252	NaN	NaN	NaN
-0.068002	1.5138	1.6152	1.6252	NaN	NaN	NaN
-0.067952	1.5138	1.5851	1.6252	NaN	NaN	NaN
-0.067902	1.5138	1.5626	1.617	NaN	NaN	NaN
-0.067852	1.518	1.5443	1.6117	NaN	NaN	NaN
-0.067803	1.5207	1.5363	1.6025	NaN	NaN	NaN
-0.067753	1.5178	1.5336	1.5949	NaN	NaN	NaN
-0.067703	1.5163	1.5279	1.5953	NaN	NaN	NaN
-0.067653	1.5178	1.5218	1.5974	NaN	NaN	NaN
-0.067603	1.517	1.5221	1.5974	NaN	NaN	NaN
-0.067553	1.5163	1.5221	1.6001	NaN	NaN	NaN
-0.067504	1.5155	1.5221	1.6018	NaN	NaN	NaN
-0.067454	1.5148	1.5153	1.6018	NaN	NaN	NaN
-0.067404	1.5121	1.5076	1.6018	NaN	NaN	NaN
-0.067354	1.5165	1.5076	1.6018	NaN	NaN	NaN
-0.067304	1.5165	1.5076	1.6035	NaN	NaN	NaN
-0.067255	1.5207	1.5153	1.6035	NaN	NaN	NaN
-0.067205	1.5262	1.5153	1.6094	NaN	NaN	NaN
-0.067155	1.53	1.4966	1.6077	NaN	NaN	NaN
-0.067105	1.53	1.4809	1.602	NaN	NaN	NaN
-0.067055	1.531	1.4809	1.5961	NaN	NaN	NaN
-0.067005	1.53	1.4661	1.5934	NaN	NaN	NaN
-0.066956	1.5247	1.4661	1.5938	NaN	NaN	NaN
-0.066906	1.5178	1.4508	1.5949	NaN	NaN	NaN
-0.066856	1.5178	1.4466	1.5938	NaN	NaN	NaN
-0.066806	1.5195	1.4424	1.5858	NaN	NaN	NaN
-0.066756	1.5287	1.4424	1.577	NaN	NaN	NaN
-0.066707	1.5195	1.4504	1.5663	NaN	NaN	NaN
-0.066657	1.5178	1.4592	1.5705	NaN	NaN	NaN
-0.066607	1.5178	1.4592	1.5705	NaN	NaN	NaN
-0.066557	1.5157	1.4531	1.5638	NaN	NaN	NaN
-0.066507	1.5157	1.4489	1.5617	NaN	NaN	NaN
-0.066457	1.5184	1.4405	1.565	NaN	NaN	NaN
-0.066408	1.5157	1.4325	1.5695	NaN	NaN	NaN
-0.066358	1.5163	1.4222	1.561	NaN	NaN	NaN
-0.066308	1.5146	1.4245	1.5591	NaN	NaN	NaN
-0.066258	1.5197	1.4245	1.561	NaN	NaN	NaN
-0.066208	1.5224	1.4245	1.5575	NaN	NaN	NaN
-0.066159	1.5235	1.4046	1.5575	NaN	NaN	NaN
-0.066109	1.5224	1.3902	1.5556	NaN	NaN	NaN
-0.066059	1.5197	1.4046	1.5533	NaN	NaN	NaN
-0.066009	1.5197	1.4245	1.5524	NaN	NaN	NaN
-0.065959	1.5224	1.4214	1.5516	NaN	NaN	NaN
-0.065909	1.5197	1.4046	1.5528	NaN	NaN	NaN
-0.06586	1.5197	1.4046	1.5554	NaN	NaN	NaN
-0.06581	1.5197	1.4046	1.5619	NaN	NaN	NaN
-0.06576	1.5224	1.4046	1.5615	NaN	NaN	NaN
-0.06571	1.5224	1.4046	1.5554	NaN	NaN	NaN
-0.06566	1.5231	1.4214	1.5486	NaN	NaN	NaN
-0.065611	1.5243	1.4214	1.5503	NaN	NaN	NaN
-0.065561	1.5279	1.4214	1.5417	NaN	NaN	NaN
-0.065511	1.5279	1.4214	1.5337	NaN	NaN	NaN
-0.065461	1.527	1.4317	1.5362	NaN	NaN	NaN
-0.065411	1.5191	1.4317	1.5337	NaN	NaN	NaN
-0.065361	1.5249	1.4317	1.5365	NaN	NaN	NaN
-0.065312	1.5249	1.4317	1.5385	NaN	NaN	NaN
-0.065262	1.514	1.4317	1.5381	NaN	NaN	NaN
-0.065212	1.5083	1.4317	1.5373	NaN	NaN	NaN
-0.065162	1.5083	1.4142	1.5411	NaN	NaN	NaN
-0.065112	1.5169	1.3974	1.544	NaN	NaN	NaN
-0.065063	1.5169	1.3902	1.5489	NaN	NaN	NaN
-0.065013	1.5218	1.3902	1.556	NaN	NaN	NaN
-0.064963	1.5188	1.3902	1.5547	NaN	NaN	NaN
-0.064913	1.5245	1.3902	1.552	NaN	NaN	NaN
-0.064863	1.5331	1.3902	1.5482	NaN	NaN	NaN
-0.064813	1.5399	1.3902	1.5444	NaN	NaN	NaN
-0.064764	1.5399	1.3902	1.543	NaN	NaN	NaN
-0.064714	1.5361	1.3974	1.5432	NaN	NaN	NaN
-0.064664	1.5331	1.4142	1.5444	NaN	NaN	NaN
-0.064614	1.5281	1.4142	1.5499	NaN	NaN	NaN
-0.064564	1.5331	1.3974	1.5531	NaN	NaN	NaN
-0.064515	1.5361	1.3974	1.5449	NaN	NaN	NaN
-0.064465	1.5361	1.3974	1.5436	NaN	NaN	NaN
-0.064415	1.543	1.3974	1.5455	NaN	NaN	NaN
-0.064365	1.543	1.3951	1.5398	NaN	NaN	NaN
-0.064315	1.5361	1.405	1.5348	NaN	NaN	NaN
-0.064265	1.5331	1.4245	1.5331	NaN	NaN	NaN
-0.064216	1.543	1.4142	1.5333	NaN	NaN	NaN
-0.064166	1.5483	1.4062	1.5404	NaN	NaN	NaN
-0.064116	1.5552	1.3985	1.5451	NaN	NaN	NaN
-0.064066	1.5552	1.3951	1.556	NaN	NaN	NaN
-0.064016	1.5493	1.3959	1.5596	NaN	NaN	NaN
-0.063967	1.5493	1.3959	1.5589	NaN	NaN	NaN
-0.063917	1.5552	1.3959	1.5547	NaN	NaN	NaN
-0.063867	1.558	1.3959	1.5493	NaN	NaN	NaN
-0.063817	1.5558	1.3959	1.5516	NaN	NaN	NaN
-0.063767	1.5544	1.3959	1.5564	NaN	NaN	NaN
-0.063717	1.5603	1.3959	1.5602	NaN	NaN	NaN
-0.063668	1.5563	1.4142	1.5615	NaN	NaN	NaN
-0.063618	1.556	1.4268	1.5633	NaN	NaN	NaN
-0.063568	1.556	1.4268	1.5592	NaN	NaN	NaN
-0.063518	1.5579	1.4241	1.5587	NaN	NaN	NaN
-0.063468	1.5579	1.4241	1.5579	NaN	NaN	NaN
-0.063419	1.56	1.4375	1.5596	NaN	NaN	NaN
-0.063369	1.5655	1.4577	1.5633	NaN	NaN	NaN
-0.063319	1.5676	1.4661	1.5633	NaN	NaN	NaN
-0.063269	1.5683	1.4539	1.5676	NaN	NaN	NaN
-0.063219	1.5712	1.4706	1.5686	NaN	NaN	NaN
-0.063169	1.5712	1.4764	1.5631	NaN	NaN	NaN
-0.06312	1.5712	1.4798	1.555	NaN	NaN	NaN
-0.06307	1.5668	1.4859	1.5583	NaN	NaN	NaN
-0.06302	1.5729	1.4916	1.5583	NaN	NaN	NaN
-0.06297	1.5773	1.4951	1.5602	NaN	NaN	NaN
-0.06292	1.5773	1.4951	1.5625	NaN	NaN	NaN
-0.062871	1.5729	1.4951	1.5625	NaN	NaN	NaN
-0.062821	1.5729	1.5233	1.5634	NaN	NaN	NaN
-0.062771	1.5746	1.5347	1.5646	NaN	NaN	NaN
-0.062721	1.5746	1.5347	1.564	NaN	NaN	NaN
-0.062671	1.5729	1.526	1.5627	NaN	NaN	NaN
-0.062621	1.5828	1.526	1.557	NaN	NaN	NaN
-0.062572	1.5901	1.5347	1.5474	NaN	NaN	NaN
-0.062522	1.5933	1.5347	1.5243	NaN	NaN	NaN
-0.062472	1.5933	1.5347	1.5083	NaN	NaN	NaN
-0.062422	1.5912	1.542	1.5114	NaN	NaN	NaN
-0.062372	1.5888	1.5485	1.5257	NaN	NaN	NaN
-0.062323	1.5836	1.5485	1.5257	NaN	NaN	NaN
-0.062273	1.5792	1.5485	1.5194	NaN	NaN	NaN
-0.062223	1.5844	1.5618	1.5241	NaN	NaN	NaN
-0.062173	1.5868	1.5618	1.5241	NaN	NaN	NaN
-0.062123	1.5868	1.5618	1.5241	NaN	NaN	NaN
-0.062073	1.5821	1.5755	1.5241	NaN	NaN	NaN
-0.062024	1.583	1.5755	1.527	NaN	NaN	NaN
-0.061974	1.5785	1.5755	1.527	NaN	NaN	NaN
-0.061924	1.5798	1.5813	1.527	NaN	NaN	NaN
-0.061874	1.5798	1.5813	1.5241	NaN	NaN	NaN
-0.061824	1.5849	1.5755	1.518	NaN	NaN	NaN
-0.061775	1.592	1.5683	1.518	NaN	NaN	NaN
-0.061725	1.5849	1.5683	1.518	NaN	NaN	NaN
-0.061675	1.5849	1.5683	1.5213	NaN	NaN	NaN
-0.061625	1.5798	1.5683	1.51	NaN	NaN	NaN
-0.061575	1.5836	1.5576	1.5034	NaN	NaN	NaN
-0.061525	1.5836	1.5508	1.5095	NaN	NaN	NaN
-0.061476	1.5836	1.5481	1.5095	NaN	NaN	NaN
-0.061426	1.5827	1.5347	1.5123	NaN	NaN	NaN
-0.061376	1.5724	1.5225	1.5127	NaN	NaN	NaN
-0.061326	1.5724	1.5225	1.5091	NaN	NaN	NaN
-0.061276	1.5827	1.5347	1.5062	NaN	NaN	NaN
-0.061227	1.5752	1.5347	1.4969	NaN	NaN	NaN
-0.061177	1.5724	1.5225	1.4894	NaN	NaN	NaN
-0.061127	1.5645	1.5206	1.4791	NaN	NaN	NaN
-0.061077	1.5645	1.5191	1.4707	NaN	NaN	NaN
-0.061027	1.5645	1.5191	1.4707	NaN	NaN	NaN
-0.060977	1.5632	1.5145	1.4707	NaN	NaN	NaN
-0.060928	1.5579	1.5103	1.4757	NaN	NaN	NaN
-0.060878	1.5579	1.5103	1.4723	NaN	NaN	NaN
-0.060828	1.5508	1.4977	1.4759	NaN	NaN	NaN
-0.060778	1.5497	1.4802	1.4759	NaN	NaN	NaN
-0.060728	1.5491	1.4622	1.4694	NaN	NaN	NaN
-0.060679	1.5544	1.4489	1.4656	NaN	NaN	NaN
-0.060629	1.5584	1.4462	1.4622	NaN	NaN	NaN
-0.060579	1.5584	1.4371	1.4536	NaN	NaN	NaN
-0.060529	1.5544	1.4371	1.4608	NaN	NaN	NaN
-0.060479	1.5495	1.4371	1.4673	NaN	NaN	NaN
-0.060429	1.5548	1.4371	1.4711	NaN	NaN	NaN
-0.06038	1.5546	1.4462	1.4681	NaN	NaN	NaN
-0.06033	1.5546	1.4489	1.4664	NaN	NaN	NaN
-0.06028	1.5588	1.4588	1.4641	NaN	NaN	NaN
-0.06023	1.5603	1.4569	1.4669	NaN	NaN	NaN
-0.06018	1.5519	1.4569	1.4698	NaN	NaN	NaN
-0.060131	1.5504	1.4569	1.47	NaN	NaN	NaN
-0.060081	1.5504	1.4489	1.4753	NaN	NaN	NaN
-0.060031	1.539	1.4462	1.4786	NaN	NaN	NaN
-0.059981	1.5519	1.4371	1.4803	NaN	NaN	NaN
-0.059931	1.5519	1.4371	1.4803	NaN	NaN	NaN
-0.059881	1.5519	1.4275	1.4803	NaN	NaN	NaN
-0.059832	1.539	1.4218	1.4833	NaN	NaN	NaN
-0.059782	1.5441	1.4073	1.4809	NaN	NaN	NaN
-0.059732	1.5416	1.418	1.4751	NaN	NaN	NaN
-0.059682	1.5432	1.4073	1.4706	NaN	NaN	NaN
-0.059632	1.5437	1.418	1.4706	NaN	NaN	NaN
-0.059583	1.5386	1.4191	1.4706	NaN	NaN	NaN
-0.059533	1.5306	1.4211	1.4706	NaN	NaN	NaN
-0.059483	1.5411	1.4218	1.4679	NaN	NaN	NaN
-0.059433	1.5445	1.4264	1.4671	NaN	NaN	NaN
-0.059383	1.5411	1.4657	1.4679	NaN	NaN	NaN
-0.059333	1.5306	1.5027	1.4679	NaN	NaN	NaN
-0.059284	1.5306	1.5061	1.4625	NaN	NaN	NaN
-0.059234	1.5331	1.5061	1.4667	NaN	NaN	NaN
-0.059184	1.5218	1.5061	1.466	NaN	NaN	NaN
-0.059134	1.5146	1.5107	1.4641	NaN	NaN	NaN
-0.059084	1.5146	1.5107	1.4624	NaN	NaN	NaN
-0.059035	1.517	1.5141	1.4599	NaN	NaN	NaN
-0.058985	1.5146	1.5172	1.4633	NaN	NaN	NaN
-0.058935	1.5195	1.5282	1.4633	NaN	NaN	NaN
-0.058885	1.521	1.5424	1.4633	NaN	NaN	NaN
-0.058835	1.5148	1.5553	1.4664	NaN	NaN	NaN
-0.058785	1.5096	1.5649	1.4681	NaN	NaN	NaN
-0.058736	1.5086	1.5687	1.469	NaN	NaN	NaN
-0.058686	1.5109	1.5797	1.4677	NaN	NaN	NaN
-0.058636	1.513	1.5969	1.4681	NaN	NaN	NaN
-0.058586	1.5109	1.6038	1.4797	NaN	NaN	NaN
-0.058536	1.5148	1.6038	1.4933	NaN	NaN	NaN
-0.058487	1.5121	1.6038	1.4984	NaN	NaN	NaN
-0.058437	1.5144	1.6145	1.4965	NaN	NaN	NaN
-0.058387	1.5121	1.6393	1.4933	NaN	NaN	NaN
-0.058337	1.5121	1.6393	1.5049	NaN	NaN	NaN
-0.058287	1.5121	1.6145	1.5112	NaN	NaN	NaN
-0.058237	1.5121	1.6145	1.5125	NaN	NaN	NaN
-0.058188	1.5144	1.619	1.5137	NaN	NaN	NaN
-0.058138	1.5144	1.6053	1.5032	NaN	NaN	NaN
-0.058088	1.5113	1.6053	1.4957	NaN	NaN	NaN
-0.058038	1.513	1.5954	1.4919	NaN	NaN	NaN
-0.057988	1.5199	1.5878	1.4919	NaN	NaN	NaN
-0.057939	1.5281	1.5691	1.4919	NaN	NaN	NaN
-0.057889	1.5306	1.5515	1.4971	NaN	NaN	NaN
-0.057839	1.5306	1.5431	1.5022	NaN	NaN	NaN
-0.057789	1.5325	1.5279	1.5077	NaN	NaN	NaN
-0.057739	1.5413	1.5115	1.5137	NaN	NaN	NaN
-0.057689	1.5413	1.5115	1.5213	NaN	NaN	NaN
-0.05764	1.5371	1.5141	1.5295	NaN	NaN	NaN
-0.05759	1.5323	1.5256	1.5234	NaN	NaN	NaN
-0.05754	1.5323	1.5427	1.5169	NaN	NaN	NaN
-0.05749	1.5313	1.5607	1.5201	NaN	NaN	NaN
-0.05744	1.5287	1.5729	1.5245	NaN	NaN	NaN
-0.057391	1.5287	1.582	1.5215	NaN	NaN	NaN
-0.057341	1.5327	1.582	1.5234	NaN	NaN	NaN
-0.057291	1.5327	1.582	1.5224	NaN	NaN	NaN
-0.057241	1.5327	1.5824	1.518	NaN	NaN	NaN
-0.057191	1.5296	1.5851	1.5108	NaN	NaN	NaN
-0.057141	1.5296	1.5851	1.506	NaN	NaN	NaN
-0.057092	1.531	1.5927	1.5045	NaN	NaN	NaN
-0.057042	1.531	1.5927	1.4997	NaN	NaN	NaN
-0.056992	1.5279	1.5927	1.4963	NaN	NaN	NaN
-0.056942	1.5241	1.6034	1.4936	NaN	NaN	NaN
-0.056892	1.5243	1.6114	1.4803	NaN	NaN	NaN
-0.056843	1.5251	1.619	1.4643	NaN	NaN	NaN
-0.056793	1.5243	1.6293	1.4595	NaN	NaN	NaN
-0.056743	1.5243	1.6293	1.4498	NaN	NaN	NaN
-0.056693	1.5237	1.6251	1.4475	NaN	NaN	NaN
-0.056643	1.5241	1.6148	1.4459	NaN	NaN	NaN
-0.056593	1.5281	1.6148	1.4372	NaN	NaN	NaN
-0.056544	1.5359	1.6148	1.4261	NaN	NaN	NaN
-0.056494	1.5321	1.6045	1.4131	NaN	NaN	NaN
-0.056444	1.5281	1.5969	1.4053	NaN	NaN	NaN
-0.056394	1.5216	1.5935	1.4055	NaN	NaN	NaN
-0.056344	1.5193	1.5904	1.3965	NaN	NaN	NaN
-0.056295	1.5216	1.5801	1.3895	NaN	NaN	NaN
-0.056245	1.5281	1.571	1.3927	NaN	NaN	NaN
-0.056195	1.5291	1.5656	1.3927	NaN	NaN	NaN
-0.056145	1.5348	1.5553	1.3927	NaN	NaN	NaN
-0.056095	1.5388	1.5393	1.3927	NaN	NaN	NaN
-0.056045	1.5319	1.5553	1.3927	NaN	NaN	NaN
-0.055996	1.5319	1.5393	1.3925	NaN	NaN	NaN
-0.055946	1.5321	1.5218	1.3851	NaN	NaN	NaN
-0.055896	1.5275	1.4985	1.3851	NaN	NaN	NaN
-0.055846	1.5245	1.5218	1.3975	NaN	NaN	NaN
-0.055796	1.5291	1.5393	1.3975	NaN	NaN	NaN
-0.055747	1.535	1.5458	1.399	NaN	NaN	NaN
-0.055697	1.5336	1.5351	1.399	NaN	NaN	NaN
-0.055647	1.5296	1.5218	1.3929	NaN	NaN	NaN
-0.055597	1.5365	1.5027	1.3864	NaN	NaN	NaN
-0.055547	1.5361	1.5057	1.3826	NaN	NaN	NaN
-0.055497	1.5361	1.5218	1.3903	NaN	NaN	NaN
-0.055448	1.5413	1.5218	1.4015	NaN	NaN	NaN
-0.055398	1.539	1.5118	1.4015	NaN	NaN	NaN
-0.055348	1.5413	1.5042	1.3918	NaN	NaN	NaN
-0.055298	1.5399	1.5057	1.3918	NaN	NaN	NaN
-0.055248	1.5386	1.5057	1.3988	NaN	NaN	NaN
-0.055199	1.5413	1.5057	1.4072	NaN	NaN	NaN
-0.055149	1.5455	1.5027	1.4095	NaN	NaN	NaN
-0.055099	1.5426	1.5027	1.415	NaN	NaN	NaN
-0.055049	1.5399	1.5027	1.4173	NaN	NaN	NaN
-0.054999	1.5409	1.5057	1.4227	NaN	NaN	NaN
-0.054949	1.5409	1.5057	1.4246	NaN	NaN	NaN
-0.0549	1.5422	1.5027	1.4261	NaN	NaN	NaN
-0.05485	1.5422	1.4973	1.4261	NaN	NaN	NaN
-0.0548	1.5466	1.4973	1.4273	NaN	NaN	NaN
-0.05475	1.5497	1.4973	1.4278	NaN	NaN	NaN
-0.0547	1.5516	1.5027	1.4299	NaN	NaN	NaN
-0.054651	1.5516	1.5057	1.4324	NaN	NaN	NaN
-0.054601	1.5516	1.5115	1.4376	NaN	NaN	NaN
-0.054551	1.5476	1.5115	1.4376	NaN	NaN	NaN
-0.054501	1.5428	1.5054	1.44	NaN	NaN	NaN
-0.054451	1.5443	1.4973	1.449	NaN	NaN	NaN
-0.054401	1.5453	1.4973	1.4526	NaN	NaN	NaN
-0.054352	1.5407	1.4973	1.4599	NaN	NaN	NaN
-0.054302	1.5407	1.4973	1.4673	NaN	NaN	NaN
-0.054252	1.5409	1.4783	1.4805	NaN	NaN	NaN
-0.054202	1.5409	1.4634	1.5022	NaN	NaN	NaN
-0.054152	1.5453	1.4542	1.4963	NaN	NaN	NaN
-0.054103	1.5453	1.4542	1.4963	NaN	NaN	NaN
-0.054053	1.5439	1.4542	1.5037	NaN	NaN	NaN
-0.054003	1.5453	1.4428	1.5093	NaN	NaN	NaN
-0.053953	1.5502	1.439	1.5074	NaN	NaN	NaN
-0.053903	1.5502	1.439	1.5125	NaN	NaN	NaN
-0.053853	1.5502	1.4428	1.5144	NaN	NaN	NaN
-0.053804	1.5502	1.4428	1.5144	NaN	NaN	NaN
-0.053754	1.5489	1.4394	1.5125	NaN	NaN	NaN
-0.053704	1.5479	1.4516	1.5177	NaN	NaN	NaN
-0.053654	1.5508	1.4546	1.523	NaN	NaN	NaN
-0.053604	1.5508	1.4546	1.5272	NaN	NaN	NaN
-0.053555	1.5544	1.4516	1.5255	NaN	NaN	NaN
-0.053505	1.5508	1.4546	1.5282	NaN	NaN	NaN
-0.053455	1.5527	1.4596	1.5245	NaN	NaN	NaN
-0.053405	1.5563	1.4596	1.5255	NaN	NaN	NaN
-0.053355	1.5582	1.4546	1.5493	NaN	NaN	NaN
-0.053305	1.5586	1.4546	1.5625	NaN	NaN	NaN
-0.053256	1.5567	1.4546	1.5629	NaN	NaN	NaN
-0.053206	1.5563	1.4596	1.5615	NaN	NaN	NaN
-0.053156	1.5542	1.4657	1.5589	NaN	NaN	NaN
-0.053106	1.5542	1.4718	1.5589	NaN	NaN	NaN
-0.053056	1.5523	1.4718	1.5589	NaN	NaN	NaN
-0.053007	1.5487	1.4657	1.5571	NaN	NaN	NaN
-0.052957	1.5434	1.4657	1.5585	NaN	NaN	NaN
-0.052907	1.5487	1.4657	1.5596	NaN	NaN	NaN
-0.052857	1.5487	1.4718	1.5566	NaN	NaN	NaN
-0.052807	1.5453	1.4657	1.5522	NaN	NaN	NaN
-0.052757	1.5394	1.4588	1.5509	NaN	NaN	NaN
-0.052708	1.5285	1.4588	1.5478	NaN	NaN	NaN
-0.052658	1.5266	1.4516	1.5554	NaN	NaN	NaN
-0.052608	1.5262	1.4394	1.5633	NaN	NaN	NaN
-0.052558	1.535	1.4516	1.5676	NaN	NaN	NaN
-0.052508	1.5313	1.4516	1.5707	NaN	NaN	NaN
-0.052459	1.5186	1.4516	1.5707	NaN	NaN	NaN
-0.052409	1.5174	1.4516	1.5688	NaN	NaN	NaN
-0.052359	1.5127	1.4386	1.5678	NaN	NaN	NaN
-0.052309	1.5022	1.4386	1.5657	NaN	NaN	NaN
-0.052259	1.4924	1.4516	1.5682	NaN	NaN	NaN
-0.052209	1.4905	1.4516	1.5665	NaN	NaN	NaN
-0.05216	1.4875	1.4516	1.5648	NaN	NaN	NaN
-0.05211	1.4913	1.4516	1.5631	NaN	NaN	NaN
-0.05206	1.4924	1.4584	1.5589	NaN	NaN	NaN
-0.05201	1.4934	1.4634	1.5533	NaN	NaN	NaN
-0.05196	1.5016	1.4657	1.5613	NaN	NaN	NaN
-0.051911	1.5125	1.4718	1.5737	NaN	NaN	NaN
-0.051861	1.5136	1.4718	1.5575	NaN	NaN	NaN
-0.051811	1.5241	1.4718	1.536	NaN	NaN	NaN
-0.051761	1.5289	1.4718	1.528	NaN	NaN	NaN
-0.051711	1.5289	1.4771	1.527	NaN	NaN	NaN
-0.051661	1.5197	1.4798	1.5243	NaN	NaN	NaN
-0.051612	1.5163	1.4851	1.5194	NaN	NaN	NaN
-0.051562	1.5163	1.4928	1.5316	NaN	NaN	NaN
-0.051512	1.5144	1.5042	1.544	NaN	NaN	NaN
-0.051462	1.5094	1.5153	1.544	NaN	NaN	NaN
-0.051412	1.5144	1.5153	1.536	NaN	NaN	NaN
-0.051363	1.5176	1.5153	1.536	NaN	NaN	NaN
-0.051313	1.5197	1.5153	1.536	NaN	NaN	NaN
-0.051263	1.5235	1.5153	1.5186	NaN	NaN	NaN
-0.051213	1.5235	1.5153	1.5047	NaN	NaN	NaN
-0.051163	1.5134	1.5225	1.502	NaN	NaN	NaN
-0.051113	1.5134	1.5309	1.5066	NaN	NaN	NaN
-0.051064	1.5134	1.5458	1.5066	NaN	NaN	NaN
-0.051014	1.5113	1.5458	1.5148	NaN	NaN	NaN
-0.050964	1.4995	1.5458	1.5207	NaN	NaN	NaN
-0.050914	1.4999	1.5786	1.5118	NaN	NaN	NaN
-0.050864	1.4999	1.6015	1.5049	NaN	NaN	NaN
-0.050815	1.4959	1.6034	1.5005	NaN	NaN	NaN
-0.050765	1.4974	1.6061	1.5034	NaN	NaN	NaN
-0.050715	1.4951	1.6084	1.5034	NaN	NaN	NaN
-0.050665	1.4951	1.6084	1.5022	NaN	NaN	NaN
-0.050615	1.4928	1.616	1.4982	NaN	NaN	NaN
-0.050565	1.4951	1.6312	1.4858	NaN	NaN	NaN
-0.050516	1.4951	1.6454	1.4778	NaN	NaN	NaN
-0.050466	1.4919	1.6572	1.4774	NaN	NaN	NaN
-0.050416	1.4936	1.6717	1.4721	NaN	NaN	NaN
-0.050366	1.489	1.6801	1.4774	NaN	NaN	NaN
-0.050316	1.4882	1.6801	1.4778	NaN	NaN	NaN
-0.050267	1.4833	1.6801	1.4833	NaN	NaN	NaN
-0.050217	1.4833	1.6801	1.4839	NaN	NaN	NaN
-0.050167	1.4816	1.6843	1.4786	NaN	NaN	NaN
-0.050117	1.4839	1.6908	1.4728	NaN	NaN	NaN
-0.050067	1.4892	1.7018	1.4633	NaN	NaN	NaN
-0.050017	1.4947	1.7083	1.454	NaN	NaN	NaN
-0.049968	1.4947	1.7106	1.454	NaN	NaN	NaN
-0.049918	1.4936	1.7106	1.4633	NaN	NaN	NaN
-0.049868	1.4961	1.7091	1.4725	NaN	NaN	NaN
-0.049818	1.4974	1.7091	1.4629	NaN	NaN	NaN
-0.049768	1.5035	1.7091	1.4524	NaN	NaN	NaN
-0.049719	1.5111	1.7091	1.4618	NaN	NaN	NaN
-0.049669	1.5169	1.7091	1.4681	NaN	NaN	NaN
-0.049619	1.5169	1.7091	1.4513	NaN	NaN	NaN
-0.049569	1.5169	1.7091	1.4339	NaN	NaN	NaN
-0.049519	1.5174	1.7091	1.4404	NaN	NaN	NaN
-0.049469	1.5121	1.7037	1.4427	NaN	NaN	NaN
-0.04942	1.5121	1.6927	1.4377	NaN	NaN	NaN
-0.04937	1.5121	1.6873	1.4345	NaN	NaN	NaN
-0.04932	1.5127	1.6873	1.4328	NaN	NaN	NaN
-0.04927	1.5127	1.6873	1.4324	NaN	NaN	NaN
-0.04922	1.5039	1.6927	1.4311	NaN	NaN	NaN
-0.049171	1.5039	1.7068	1.424	NaN	NaN	NaN
-0.049121	1.5045	1.706	1.4025	NaN	NaN	NaN
-0.049071	1.5045	1.6995	1.4023	NaN	NaN	NaN
-0.049021	1.5127	1.6946	1.4023	NaN	NaN	NaN
-0.048971	1.5127	1.6888	1.3878	NaN	NaN	NaN
-0.048921	1.5127	1.6793	1.3876	NaN	NaN	NaN
-0.048872	1.5052	1.6564	1.38	NaN	NaN	NaN
-0.048822	1.4957	1.6385	1.3794	NaN	NaN	NaN
-0.048772	1.4957	1.629	1.3729	NaN	NaN	NaN
-0.048722	1.5066	1.6202	1.3763	NaN	NaN	NaN
-0.048672	1.5155	1.6202	1.3727	NaN	NaN	NaN
-0.048623	1.5066	1.6156	1.3639	NaN	NaN	NaN
-0.048573	1.5008	1.6045	1.3636	NaN	NaN	NaN
-0.048523	1.5104	1.5866	1.3636	NaN	NaN	NaN
-0.048473	1.5193	1.5866	1.3636	NaN	NaN	NaN
-0.048423	1.5193	1.5866	1.3605	NaN	NaN	NaN
-0.048373	1.5239	1.6045	1.3563	NaN	NaN	NaN
-0.048324	1.5262	1.6045	1.3628	NaN	NaN	NaN
-0.048274	1.5262	1.6003	1.3624	NaN	NaN	NaN
-0.048224	1.531	1.5866	1.3592	NaN	NaN	NaN
-0.048174	1.5359	1.5687	1.3563	NaN	NaN	NaN
-0.048124	1.5432	1.5523	1.355	NaN	NaN	NaN
-0.048075	1.538	1.5523	1.362	NaN	NaN	NaN
-0.048025	1.5415	1.5523	1.3685	NaN	NaN	NaN
-0.047975	1.5447	1.5313	1.3813	NaN	NaN	NaN
-0.047925	1.5447	1.5313	1.3834	NaN	NaN	NaN
-0.047875	1.5447	1.5313	1.3899	NaN	NaN	NaN
-0.047825	1.5447	1.5046	1.3908	NaN	NaN	NaN
-0.047776	1.5502	1.4779	1.4097	NaN	NaN	NaN
-0.047726	1.5565	1.4745	1.4187	NaN	NaN	NaN
-0.047676	1.5565	1.4596	1.42	NaN	NaN	NaN
-0.047626	1.5565	1.4508	1.4227	NaN	NaN	NaN
-0.047576	1.5565	1.4508	1.4343	NaN	NaN	NaN
-0.047527	1.5582	1.4508	1.4406	NaN	NaN	NaN
-0.047477	1.5657	1.4508	1.4479	NaN	NaN	NaN
-0.047427	1.5657	1.4596	1.4549	NaN	NaN	NaN
-0.047377	1.5657	1.4508	1.4528	NaN	NaN	NaN
-0.047327	1.5626	1.4474	1.4469	NaN	NaN	NaN
-0.047277	1.5582	1.4474	1.4469	NaN	NaN	NaN
-0.047228	1.5619	1.4474	1.4511	NaN	NaN	NaN
-0.047178	1.5683	1.4474	1.4408	NaN	NaN	NaN
-0.047128	1.5634	1.4508	1.4418	NaN	NaN	NaN
-0.047078	1.5634	1.4596	1.4418	NaN	NaN	NaN
-0.047028	1.5647	1.4596	1.4294	NaN	NaN	NaN
-0.046979	1.5647	1.4596	1.4278	NaN	NaN	NaN
-0.046929	1.5683	1.4596	1.4273	NaN	NaN	NaN
-0.046879	1.5683	1.4745	1.4263	NaN	NaN	NaN
-0.046829	1.5704	1.484	1.4233	NaN	NaN	NaN
-0.046779	1.572	1.484	1.4213	NaN	NaN	NaN
-0.046729	1.572	1.484	1.4213	NaN	NaN	NaN
-0.04668	1.572	1.4687	1.4219	NaN	NaN	NaN
-0.04663	1.572	1.4508	1.4187	NaN	NaN	NaN
-0.04658	1.5764	1.4474	1.4168	NaN	NaN	NaN
-0.04653	1.5748	1.4508	1.4143	NaN	NaN	NaN
-0.04648	1.5748	1.4687	1.4177	NaN	NaN	NaN
-0.046431	1.5764	1.4687	1.4252	NaN	NaN	NaN
-0.046381	1.5764	1.4508	1.4271	NaN	NaN	NaN
-0.046331	1.5748	1.4508	1.4271	NaN	NaN	NaN
-0.046281	1.5727	1.4687	1.4377	NaN	NaN	NaN
-0.046231	1.5683	1.484	1.4461	NaN	NaN	NaN
-0.046181	1.5704	1.484	1.4463	NaN	NaN	NaN
-0.046132	1.5748	1.484	1.4463	NaN	NaN	NaN
-0.046082	1.5727	1.484	1.4444	NaN	NaN	NaN
-0.046032	1.5683	1.4931	1.4404	NaN	NaN	NaN
-0.045982	1.5668	1.4931	1.4404	NaN	NaN	NaN
-0.045932	1.5683	1.5034	1.444	NaN	NaN	NaN
-0.045883	1.5683	1.5034	1.4486	NaN	NaN	NaN
-0.045833	1.5657	1.5034	1.4517	NaN	NaN	NaN
-0.045783	1.5586	1.5034	1.4517	NaN	NaN	NaN
-0.045733	1.5571	1.5054	1.4559	NaN	NaN	NaN
-0.045683	1.5588	1.508	1.4612	NaN	NaN	NaN
-0.045633	1.5506	1.5237	1.4637	NaN	NaN	NaN
-0.045584	1.5359	1.5237	1.4673	NaN	NaN	NaN
-0.045534	1.5331	1.5446	1.4744	NaN	NaN	NaN
-0.045484	1.5331	1.5549	1.4782	NaN	NaN	NaN
-0.045434	1.5439	1.5446	1.4826	NaN	NaN	NaN
-0.045384	1.5506	1.5237	1.4881	NaN	NaN	NaN
-0.045335	1.5506	1.5237	1.4919	NaN	NaN	NaN
-0.045285	1.5409	1.5237	1.4942	NaN	NaN	NaN
-0.045235	1.5409	1.5237	1.4946	NaN	NaN	NaN
-0.045185	1.554	1.5446	1.4953	NaN	NaN	NaN
-0.045135	1.5571	1.5549	1.4913	NaN	NaN	NaN
-0.045085	1.556	1.5549	1.4913	NaN	NaN	NaN
-0.045036	1.5542	1.5549	1.4904	NaN	NaN	NaN
-0.044986	1.5523	1.5549	1.4915	NaN	NaN	NaN
-0.044936	1.5554	1.5591	1.4952	NaN	NaN	NaN
-0.044886	1.5542	1.5591	1.498	NaN	NaN	NaN
-0.044836	1.5504	1.5591	1.5018	NaN	NaN	NaN
-0.044787	1.5504	1.5591	1.5068	NaN	NaN	NaN
-0.044737	1.5539	1.5591	1.5089	NaN	NaN	NaN
-0.044687	1.5495	1.5508	1.5089	NaN	NaN	NaN
-0.044637	1.5495	1.5508	1.5098	NaN	NaN	NaN
-0.044587	1.542	1.5508	1.5135	NaN	NaN	NaN
-0.044537	1.5426	1.5508	1.5175	NaN	NaN	NaN
-0.044488	1.5493	1.5591	1.5243	NaN	NaN	NaN
-0.044438	1.5479	1.5591	1.5221	NaN	NaN	NaN
-0.044388	1.5434	1.5591	1.5253	NaN	NaN	NaN
-0.044338	1.535	1.5649	1.5272	NaN	NaN	NaN
-0.044288	1.535	1.5736	1.5266	NaN	NaN	NaN
-0.044239	1.5413	1.582	1.5247	NaN	NaN	NaN
-0.044189	1.5413	1.5866	1.5213	NaN	NaN	NaN
-0.044139	1.5413	1.5874	1.5266	NaN	NaN	NaN
-0.044089	1.5333	1.5878	1.5257	NaN	NaN	NaN
-0.044039	1.5333	1.5878	1.5261	NaN	NaN	NaN
-0.043989	1.5413	1.5885	1.5213	NaN	NaN	NaN
-0.04394	1.5409	1.59	1.5213	NaN	NaN	NaN
-0.04389	1.5422	1.5977	1.5213	NaN	NaN	NaN
-0.04384	1.5506	1.5977	1.519	NaN	NaN	NaN
-0.04379	1.5506	1.5977	1.5079	NaN	NaN	NaN
-0.04374	1.5506	1.5977	1.5112	NaN	NaN	NaN
-0.043691	1.5485	1.6148	1.5148	NaN	NaN	NaN
-0.043641	1.5523	1.6408	1.5205	NaN	NaN	NaN
-0.043591	1.5544	1.6564	1.5293	NaN	NaN	NaN
-0.043541	1.5544	1.661	1.536	NaN	NaN	NaN
-0.043491	1.5544	1.6766	1.5337	NaN	NaN	NaN
-0.043441	1.5523	1.6766	1.531	NaN	NaN	NaN
-0.043392	1.5472	1.6766	1.5362	NaN	NaN	NaN
-0.043342	1.5472	1.6896	1.54	NaN	NaN	NaN
-0.043292	1.5443	1.6911	1.5413	NaN	NaN	NaN
-0.043242	1.5449	1.6896	1.5427	NaN	NaN	NaN
-0.043192	1.5472	1.6896	1.5425	NaN	NaN	NaN
-0.043143	1.5485	1.6911	1.5501	NaN	NaN	NaN
-0.043093	1.5485	1.7148	1.5566	NaN	NaN	NaN
-0.043043	1.5472	1.7411	1.5591	NaN	NaN	NaN
-0.042993	1.5485	1.7438	1.5558	NaN	NaN	NaN
-0.042943	1.5409	1.7457	1.5526	NaN	NaN	NaN
-0.042893	1.5304	1.7602	1.5495	NaN	NaN	NaN
-0.042844	1.5304	1.7838	1.5409	NaN	NaN	NaN
-0.042794	1.5384	1.8021	1.5354	NaN	NaN	NaN
-0.042744	1.5254	1.8132	1.5341	NaN	NaN	NaN
-0.042694	1.5174	1.8102	1.5341	NaN	NaN	NaN
-0.042644	1.5134	1.817	1.5371	NaN	NaN	NaN
-0.042595	1.5092	1.8227	1.5396	NaN	NaN	NaN
-0.042545	1.502	1.8227	1.5396	NaN	NaN	NaN
-0.042495	1.5014	1.8227	1.536	NaN	NaN	NaN
-0.042445	1.5031	1.8227	1.5344	NaN	NaN	NaN
-0.042395	1.5014	1.8269	1.5339	NaN	NaN	NaN
-0.042345	1.5014	1.8174	1.5348	NaN	NaN	NaN
-0.042296	1.4989	1.8204	1.5348	NaN	NaN	NaN
-0.042246	1.4989	1.8269	1.536	NaN	NaN	NaN
-0.042196	1.5012	1.8296	1.5375	NaN	NaN	NaN
-0.042146	1.5054	1.8296	1.5375	NaN	NaN	NaN
-0.042096	1.5125	1.8296	1.5375	NaN	NaN	NaN
-0.042047	1.5113	1.8296	1.5406	NaN	NaN	NaN
-0.041997	1.5092	1.8269	1.5444	NaN	NaN	NaN
-0.041947	1.5008	1.8269	1.5497	NaN	NaN	NaN
-0.041897	1.5092	1.8269	1.5598	NaN	NaN	NaN
-0.041847	1.5199	1.8269	1.5648	NaN	NaN	NaN
-0.041797	1.5199	1.8269	1.5659	NaN	NaN	NaN
-0.041748	1.5235	1.8204	1.5661	NaN	NaN	NaN
-0.041698	1.5285	1.8079	1.572	NaN	NaN	NaN
-0.041648	1.5176	1.7976	1.5816	NaN	NaN	NaN
-0.041598	1.5176	1.793	1.5886	NaN	NaN	NaN
-0.041548	1.5235	1.793	1.5905	NaN	NaN	NaN
-0.041499	1.5235	1.793	1.5943	NaN	NaN	NaN
-0.041449	1.5235	1.7915	1.6004	NaN	NaN	NaN
-0.041399	1.5285	1.7915	1.598	NaN	NaN	NaN
-0.041349	1.5237	1.7976	1.5976	NaN	NaN	NaN
-0.041299	1.5285	1.8044	1.5951	NaN	NaN	NaN
-0.041249	1.5172	1.8044	1.5961	NaN	NaN	NaN
-0.0412	1.5117	1.8044	1.5961	NaN	NaN	NaN
-0.04115	1.5086	1.7976	1.5961	NaN	NaN	NaN
-0.0411	1.5189	1.7976	1.5951	NaN	NaN	NaN
-0.04105	1.5231	1.7915	1.5913	NaN	NaN	NaN
-0.041	1.5231	1.7857	1.5913	NaN	NaN	NaN
-0.040951	1.5182	1.7728	1.5886	NaN	NaN	NaN
-0.040901	1.5182	1.7857	1.5819	NaN	NaN	NaN
-0.040851	1.5226	1.7915	1.5833	NaN	NaN	NaN
-0.040801	1.5256	1.7915	1.5833	NaN	NaN	NaN
-0.040751	1.5256	1.7876	1.5756	NaN	NaN	NaN
-0.040701	1.5226	1.7876	1.5867	NaN	NaN	NaN
-0.040652	1.5159	1.7876	1.5867	NaN	NaN	NaN
-0.040602	1.5176	1.7747	1.5915	NaN	NaN	NaN
-0.040552	1.5128	1.7621	1.5838	NaN	NaN	NaN
-0.040502	1.5056	1.7621	1.5774	NaN	NaN	NaN
-0.040452	1.5128	1.7564	1.5751	NaN	NaN	NaN
-0.040403	1.5207	1.7346	1.5648	NaN	NaN	NaN
-0.040353	1.5237	1.7346	1.5701	NaN	NaN	NaN
-0.040303	1.5182	1.7564	1.5745	NaN	NaN	NaN
-0.040253	1.5123	1.7564	1.5745	NaN	NaN	NaN
-0.040203	1.5069	1.7545	1.5644	NaN	NaN	NaN
-0.040153	1.5027	1.7545	1.5701	NaN	NaN	NaN
-0.040104	1.5022	1.7545	1.5854	NaN	NaN	NaN
-0.040054	1.5069	1.7346	1.5865	NaN	NaN	NaN
-0.040004	1.5027	1.7346	1.5856	NaN	NaN	NaN
-0.039954	1.4907	1.7152	1.5877	NaN	NaN	NaN
-0.039904	1.4907	1.7037	1.5882	NaN	NaN	NaN
-0.039855	1.4907	1.6934	1.5869	NaN	NaN	NaN
-0.039805	1.498	1.6934	1.585	NaN	NaN	NaN
-0.039755	1.4932	1.6934	1.584	NaN	NaN	NaN
-0.039705	1.4877	1.6934	1.5808	NaN	NaN	NaN
-0.039655	1.4877	1.6858	1.5808	NaN	NaN	NaN
-0.039605	1.4835	1.6793	1.5808	NaN	NaN	NaN
-0.039556	1.4835	1.6858	1.5821	NaN	NaN	NaN
-0.039506	1.4877	1.6793	1.5785	NaN	NaN	NaN
-0.039456	1.4892	1.6782	1.5709	NaN	NaN	NaN
-0.039406	1.4892	1.6743	1.5652	NaN	NaN	NaN
-0.039356	1.4871	1.6782	1.564	NaN	NaN	NaN
-0.039307	1.4871	1.6793	1.5665	NaN	NaN	NaN
-0.039257	1.4892	1.6839	1.5674	NaN	NaN	NaN
-0.039207	1.4896	1.6839	1.5612	NaN	NaN	NaN
-0.039157	1.4896	1.6793	1.5461	NaN	NaN	NaN
-0.039107	1.4892	1.6793	1.5467	NaN	NaN	NaN
-0.039057	1.4921	1.6793	1.5377	NaN	NaN	NaN
-0.039008	1.4892	1.6839	1.5343	NaN	NaN	NaN
-0.038958	1.4896	1.6949	1.532	NaN	NaN	NaN
-0.038908	1.4896	1.6839	1.5261	NaN	NaN	NaN
-0.038858	1.4892	1.6793	1.5177	NaN	NaN	NaN
-0.038808	1.4871	1.6793	1.5148	NaN	NaN	NaN
-0.038759	1.4871	1.6839	1.5013	NaN	NaN	NaN
-0.038709	1.4871	1.6839	1.4776	NaN	NaN	NaN
-0.038659	1.4917	1.6839	1.4824	NaN	NaN	NaN
-0.038609	1.4917	1.6793	1.4824	NaN	NaN	NaN
-0.038559	1.4945	1.682	1.4698	NaN	NaN	NaN
-0.038509	1.4854	1.6881	1.4736	NaN	NaN	NaN
-0.03846	1.4945	1.6969	1.4797	NaN	NaN	NaN
-0.03841	1.4953	1.7041	1.4698	NaN	NaN	NaN
-0.03836	1.4953	1.7083	1.4622	NaN	NaN	NaN
-0.03831	1.4953	1.711	1.4597	NaN	NaN	NaN
-0.03826	1.4867	1.7125	1.4597	NaN	NaN	NaN
-0.038211	1.4915	1.7251	1.4543	NaN	NaN	NaN
-0.038161	1.4949	1.759	1.4543	NaN	NaN	NaN
-0.038111	1.4915	1.759	1.4582	NaN	NaN	NaN
-0.038061	1.4865	1.7823	1.4629	NaN	NaN	NaN
-0.038011	1.4865	1.7846	1.4736	NaN	NaN	NaN
-0.037961	1.4915	1.7846	1.4681	NaN	NaN	NaN
-0.037912	1.4865	1.7846	1.4681	NaN	NaN	NaN
-0.037862	1.4871	1.7823	1.4591	NaN	NaN	NaN
-0.037812	1.4907	1.7838	1.4551	NaN	NaN	NaN
-0.037762	1.4892	1.793	1.4667	NaN	NaN	NaN
-0.037712	1.4894	1.7838	1.4698	NaN	NaN	NaN
-0.037663	1.4911	1.7812	1.4662	NaN	NaN	NaN
-0.037613	1.4896	1.7812	1.4629	NaN	NaN	NaN
-0.037563	1.4879	1.7812	1.4591	NaN	NaN	NaN
-0.037513	1.4896	1.7838	1.4549	NaN	NaN	NaN
-0.037463	1.4911	1.7838	1.4543	NaN	NaN	NaN
-0.037413	1.4926	1.7827	1.4549	NaN	NaN	NaN
-0.037364	1.4919	1.7827	1.4562	NaN	NaN	NaN
-0.037314	1.4938	1.7697	1.4562	NaN	NaN	NaN
-0.037264	1.4985	1.7598	1.4549	NaN	NaN	NaN
-0.037214	1.5008	1.7537	1.4543	NaN	NaN	NaN
-0.037164	1.4985	1.7537	1.4534	NaN	NaN	NaN
-0.037115	1.4978	1.7537	1.4564	NaN	NaN	NaN
-0.037065	1.498	1.7457	1.4564	NaN	NaN	NaN
-0.037015	1.498	1.7339	1.4633	NaN	NaN	NaN
-0.036965	1.5001	1.7274	1.4694	NaN	NaN	NaN
-0.036915	1.4995	1.7209	1.4707	NaN	NaN	NaN
-0.036865	1.4983	1.7148	1.4694	NaN	NaN	NaN
-0.036816	1.4963	1.7087	1.4618	NaN	NaN	NaN
-0.036766	1.4896	1.6976	1.4711	NaN	NaN	NaN
-0.036716	1.4884	1.7087	1.4757	NaN	NaN	NaN
-0.036666	1.4947	1.7087	1.4757	NaN	NaN	NaN
-0.036616	1.4947	1.7087	1.4757	NaN	NaN	NaN
-0.036567	1.4972	1.7087	1.4702	NaN	NaN	NaN
-0.036517	1.4997	1.7087	1.4759	NaN	NaN	NaN
-0.036467	1.498	1.6976	1.4688	NaN	NaN	NaN
-0.036417	1.498	1.6976	1.4698	NaN	NaN	NaN
-0.036367	1.498	1.6866	1.4698	NaN	NaN	NaN
-0.036317	1.5031	1.6793	1.4698	NaN	NaN	NaN
-0.036268	1.5031	1.6736	1.4698	NaN	NaN	NaN
-0.036218	1.5031	1.685	1.4698	NaN	NaN	NaN
-0.036168	1.5003	1.7014	1.453	NaN	NaN	NaN
-0.036118	1.5025	1.7186	1.4416	NaN	NaN	NaN
-0.036068	1.5037	1.7274	1.4425	NaN	NaN	NaN
-0.036019	1.5088	1.7339	1.4488	NaN	NaN	NaN
-0.035969	1.51	1.7339	1.4562	NaN	NaN	NaN
-0.035919	1.5155	1.7339	1.4601	NaN	NaN	NaN
-0.035869	1.5148	1.7339	1.4646	NaN	NaN	NaN
-0.035819	1.5148	1.7339	1.4646	NaN	NaN	NaN
-0.035769	1.5249	1.7339	1.4646	NaN	NaN	NaN
-0.03572	1.5275	1.743	1.4616	NaN	NaN	NaN
-0.03567	1.53	1.743	1.4614	NaN	NaN	NaN
-0.03562	1.5313	1.743	1.4685	NaN	NaN	NaN
-0.03557	1.5329	1.743	1.4751	NaN	NaN	NaN
-0.03552	1.5329	1.743	1.4789	NaN	NaN	NaN
-0.035471	1.5325	1.743	1.4784	NaN	NaN	NaN
-0.035421	1.5333	1.7339	1.4894	NaN	NaN	NaN
-0.035371	1.5333	1.7274	1.4889	NaN	NaN	NaN
-0.035321	1.5333	1.7274	1.4839	NaN	NaN	NaN
-0.035271	1.5357	1.7339	1.4809	NaN	NaN	NaN
-0.035221	1.5357	1.748	1.4839	NaN	NaN	NaN
-0.035172	1.5325	1.7579	1.4795	NaN	NaN	NaN
-0.035122	1.5329	1.767	1.4759	NaN	NaN	NaN
-0.035072	1.5373	1.7766	1.4734	NaN	NaN	NaN
-0.035022	1.5415	1.7804	1.4784	NaN	NaN	NaN
-0.034972	1.5374	1.7804	1.4793	NaN	NaN	NaN
-0.034923	1.5378	1.7766	1.4835	NaN	NaN	NaN
-0.034873	1.5457	1.7773	1.4852	NaN	NaN	NaN
-0.034823	1.5512	1.7739	1.4822	NaN	NaN	NaN
-0.034773	1.5506	1.7739	1.4822	NaN	NaN	NaN
-0.034723	1.5457	1.7739	1.4805	NaN	NaN	NaN
-0.034673	1.5506	1.7773	1.4835	NaN	NaN	NaN
-0.034624	1.5533	1.7773	1.4871	NaN	NaN	NaN
-0.034574	1.5533	1.7773	1.486	NaN	NaN	NaN
-0.034524	1.5533	1.7739	1.483	NaN	NaN	NaN
-0.034474	1.5533	1.7716	1.4875	NaN	NaN	NaN
-0.034424	1.5519	1.7716	1.4875	NaN	NaN	NaN
-0.034375	1.5577	1.767	1.4875	NaN	NaN	NaN
-0.034325	1.5577	1.764	1.4906	NaN	NaN	NaN
-0.034275	1.5577	1.7598	1.4986	NaN	NaN	NaN
-0.034225	1.5577	1.7472	1.4986	NaN	NaN	NaN
-0.034175	1.5577	1.7361	1.4974	NaN	NaN	NaN
-0.034125	1.5613	1.7293	1.5028	NaN	NaN	NaN
-0.034076	1.5565	1.7194	1.5028	NaN	NaN	NaN
-0.034026	1.5565	1.7194	1.5058	NaN	NaN	NaN
-0.033976	1.5506	1.7102	1.507	NaN	NaN	NaN
-0.033926	1.5405	1.6976	1.507	NaN	NaN	NaN
-0.033876	1.5405	1.7056	1.507	NaN	NaN	NaN
-0.033827	1.5315	1.7056	1.5018	NaN	NaN	NaN
-0.033777	1.5352	1.6976	1.4992	NaN	NaN	NaN
-0.033727	1.5334	1.7052	1.491	NaN	NaN	NaN
-0.033677	1.53	1.7052	1.491	NaN	NaN	NaN
-0.033627	1.5287	1.7052	1.4837	NaN	NaN	NaN
-0.033577	1.5239	1.7052	1.481	NaN	NaN	NaN
-0.033528	1.517	1.7052	1.4776	NaN	NaN	NaN
-0.033478	1.514	1.7052	1.4707	NaN	NaN	NaN
-0.033428	1.514	1.6984	1.4685	NaN	NaN	NaN
-0.033378	1.5155	1.6824	1.466	NaN	NaN	NaN
-0.033328	1.514	1.6667	1.4721	NaN	NaN	NaN
-0.033279	1.514	1.6618	1.4744	NaN	NaN	NaN
-0.033229	1.5165	1.6579	1.4761	NaN	NaN	NaN
-0.033179	1.5149	1.6579	1.4759	NaN	NaN	NaN
-0.033129	1.5111	1.6579	1.4713	NaN	NaN	NaN
-0.033079	1.5086	1.6579	1.4652	NaN	NaN	NaN
-0.033029	1.5066	1.6579	1.4601	NaN	NaN	NaN
-0.03298	1.5109	1.6579	1.4564	NaN	NaN	NaN
-0.03293	1.5066	1.6579	1.4547	NaN	NaN	NaN
-0.03288	1.5066	1.6579	1.454	NaN	NaN	NaN
-0.03283	1.509	1.6618	1.454	NaN	NaN	NaN
-0.03278	1.5033	1.6667	1.4486	NaN	NaN	NaN
-0.032731	1.4985	1.6824	1.45	NaN	NaN	NaN
-0.032681	1.5033	1.6824	1.4572	NaN	NaN	NaN
-0.032631	1.5018	1.6824	1.4606	NaN	NaN	NaN
-0.032581	1.4955	1.6824	1.4627	NaN	NaN	NaN
-0.032531	1.4892	1.6824	1.4627	NaN	NaN	NaN
-0.032481	1.4934	1.6824	1.4616	NaN	NaN	NaN
-0.032432	1.4884	1.6824	1.4604	NaN	NaN	NaN
-0.032382	1.4716	1.6984	1.4467	NaN	NaN	NaN
-0.032332	1.4636	1.7052	1.4467	NaN	NaN	NaN
-0.032282	1.4587	1.6984	1.4433	NaN	NaN	NaN
-0.032232	1.4667	1.6984	1.4433	NaN	NaN	NaN
-0.032183	1.4646	1.6984	1.4297	NaN	NaN	NaN
-0.032133	1.4554	1.6984	1.4267	NaN	NaN	NaN
-0.032083	1.4554	1.6995	1.415	NaN	NaN	NaN
-0.032033	1.4646	1.7052	1.4049	NaN	NaN	NaN
-0.031983	1.4638	1.7113	1.4007	NaN	NaN	NaN
-0.031933	1.4572	1.7113	1.4034	NaN	NaN	NaN
-0.031884	1.4572	1.7052	1.4088	NaN	NaN	NaN
-0.031834	1.4638	1.7113	1.4088	NaN	NaN	NaN
-0.031784	1.4741	1.7197	1.4088	NaN	NaN	NaN
-0.031734	1.4741	1.7197	1.4088	NaN	NaN	NaN
-0.031684	1.4749	1.7072	1.4088	NaN	NaN	NaN
-0.031635	1.4764	1.7072	1.4088	NaN	NaN	NaN
-0.031585	1.4711	1.7197	1.4036	NaN	NaN	NaN
-0.031535	1.4711	1.7072	1.4036	NaN	NaN	NaN
-0.031485	1.4732	1.7072	1.4009	NaN	NaN	NaN
-0.031435	1.476	1.7197	1.4099	NaN	NaN	NaN
-0.031385	1.476	1.73	1.4126	NaN	NaN	NaN
-0.031336	1.4676	1.7422	1.4162	NaN	NaN	NaN
-0.031286	1.4676	1.7522	1.4294	NaN	NaN	NaN
-0.031236	1.4705	1.7522	1.4437	NaN	NaN	NaN
-0.031186	1.4837	1.7422	1.4543	NaN	NaN	NaN
-0.031136	1.4674	1.73	1.4561	NaN	NaN	NaN
-0.031087	1.4642	1.73	1.4641	NaN	NaN	NaN
-0.031037	1.4797	1.7438	1.4807	NaN	NaN	NaN
-0.030987	1.4797	1.7438	1.4826	NaN	NaN	NaN
-0.030937	1.4615	1.7438	1.4822	NaN	NaN	NaN
-0.030887	1.4615	1.7602	1.4803	NaN	NaN	NaN
-0.030837	1.477	1.7602	1.4686	NaN	NaN	NaN
-0.030788	1.477	1.7602	1.4545	NaN	NaN	NaN
-0.030738	1.477	1.7735	1.4545	NaN	NaN	NaN
-0.030688	1.477	1.7735	1.4545	NaN	NaN	NaN
-0.030638	1.4797	1.7735	1.4442	NaN	NaN	NaN
-0.030588	1.4875	1.7602	1.4336	NaN	NaN	NaN
-0.030539	1.4875	1.7533	1.4326	NaN	NaN	NaN
-0.030489	1.484	1.7449	1.4356	NaN	NaN	NaN
-0.030439	1.4993	1.7354	1.441	NaN	NaN	NaN
-0.030389	1.4814	1.73	1.4465	NaN	NaN	NaN
-0.030339	1.4745	1.7201	1.4509	NaN	NaN	NaN
-0.030289	1.4921	1.73	1.4566	NaN	NaN	NaN
-0.03024	1.4949	1.7354	1.4555	NaN	NaN	NaN
-0.03019	1.4877	1.7354	1.4587	NaN	NaN	NaN
-0.03014	1.4793	1.7239	1.4522	NaN	NaN	NaN
-0.03009	1.4842	1.7239	1.466	NaN	NaN	NaN
-0.03004	1.4949	1.719	1.4767	NaN	NaN	NaN
-0.029991	1.4949	1.714	1.4919	NaN	NaN	NaN
-0.029941	1.4915	1.7129	1.4835	NaN	NaN	NaN
-0.029891	1.493	1.7129	1.4877	NaN	NaN	NaN
-0.029841	1.5062	1.7129	1.4921	NaN	NaN	NaN
-0.029791	1.5062	1.7129	1.4894	NaN	NaN	NaN
-0.029741	1.5062	1.7129	1.4921	NaN	NaN	NaN
-0.029692	1.5205	1.7129	1.4952	NaN	NaN	NaN
-0.029642	1.526	1.7129	1.4976	NaN	NaN	NaN
-0.029592	1.526	1.7129	1.4984	NaN	NaN	NaN
-0.029542	1.5062	1.701	1.4988	NaN	NaN	NaN
-0.029492	1.5205	1.701	1.4997	NaN	NaN	NaN
-0.029443	1.5157	1.7129	1.5009	NaN	NaN	NaN
-0.029393	1.5033	1.714	1.5028	NaN	NaN	NaN
-0.029343	1.4913	1.714	1.5085	NaN	NaN	NaN
-0.029293	1.4913	1.714	1.5079	NaN	NaN	NaN
-0.029243	1.5033	1.719	1.5003	NaN	NaN	NaN
-0.029193	1.4913	1.7289	1.5003	NaN	NaN	NaN
-0.029144	1.493	1.7346	1.5003	NaN	NaN	NaN
-0.029094	1.5004	1.7346	1.4959	NaN	NaN	NaN
-0.029044	1.5004	1.7358	1.5036	NaN	NaN	NaN
-0.028994	1.4974	1.7365	1.5079	NaN	NaN	NaN
-0.028944	1.4974	1.7365	1.5114	NaN	NaN	NaN
-0.028895	1.4959	1.7358	1.507	NaN	NaN	NaN
-0.028845	1.5138	1.7297	1.5009	NaN	NaN	NaN
-0.028795	1.5138	1.719	1.5026	NaN	NaN	NaN
-0.028745	1.4959	1.7297	1.506	NaN	NaN	NaN
-0.028695	1.4993	1.7358	1.5146	NaN	NaN	NaN
-0.028645	1.5138	1.7358	1.5203	NaN	NaN	NaN
-0.028596	1.5138	1.7358	1.5184	NaN	NaN	NaN
-0.028546	1.4993	1.7297	1.5167	NaN	NaN	NaN
-0.028496	1.5066	1.7297	1.5114	NaN	NaN	NaN
-0.028446	1.5256	1.7297	1.5095	NaN	NaN	NaN
-0.028396	1.5237	1.719	1.5138	NaN	NaN	NaN
-0.028347	1.5209	1.719	1.5152	NaN	NaN	NaN
-0.028297	1.5096	1.7297	1.5093	NaN	NaN	NaN
-0.028247	1.5052	1.719	1.5034	NaN	NaN	NaN
-0.028197	1.5052	1.714	1.5055	NaN	NaN	NaN
-0.028147	1.5003	1.714	1.5093	NaN	NaN	NaN
-0.028097	1.4999	1.7056	1.5093	NaN	NaN	NaN
-0.028048	1.4995	1.7056	1.5034	NaN	NaN	NaN
-0.027998	1.5119	1.714	1.5055	NaN	NaN	NaN
-0.027948	1.5119	1.719	1.5055	NaN	NaN	NaN
-0.027898	1.5048	1.7297	1.5055	NaN	NaN	NaN
-0.027848	1.5172	1.7297	1.5055	NaN	NaN	NaN
-0.027799	1.5218	1.7297	1.5091	NaN	NaN	NaN
-0.027749	1.5188	1.7297	1.5165	NaN	NaN	NaN
-0.027699	1.5218	1.7297	1.5182	NaN	NaN	NaN
-0.027649	1.5281	1.7297	1.5154	NaN	NaN	NaN
-0.027599	1.5258	1.7232	1.514	NaN	NaN	NaN
-0.027549	1.5226	1.7182	1.5089	NaN	NaN	NaN
-0.0275	1.5218	1.7289	1.4995	NaN	NaN	NaN
-0.02745	1.5218	1.7304	1.4921	NaN	NaN	NaN
-0.0274	1.5193	1.7239	1.4873	NaN	NaN	NaN
-0.02735	1.5121	1.7239	1.4898	NaN	NaN	NaN
-0.0273	1.5024	1.7289	1.4961	NaN	NaN	NaN
-0.027251	1.4963	1.7213	1.4969	NaN	NaN	NaN
-0.027201	1.4963	1.7213	1.4969	NaN	NaN	NaN
-0.027151	1.4951	1.7213	1.4931	NaN	NaN	NaN
-0.027101	1.4951	1.7289	1.4891	NaN	NaN	NaN
-0.027051	1.4993	1.7293	1.4891	NaN	NaN	NaN
-0.027001	1.4993	1.7293	1.4891	NaN	NaN	NaN
-0.026952	1.4993	1.7293	1.4891	NaN	NaN	NaN
-0.026902	1.5014	1.7213	1.4891	NaN	NaN	NaN
-0.026852	1.5067	1.714	1.487	NaN	NaN	NaN
-0.026802	1.5014	1.714	1.4948	NaN	NaN	NaN
-0.026752	1.4993	1.7056	1.4959	NaN	NaN	NaN
-0.026703	1.4993	1.6927	1.4959	NaN	NaN	NaN
-0.026653	1.4993	1.6846	1.5022	NaN	NaN	NaN
-0.026603	1.4966	1.6835	1.4961	NaN	NaN	NaN
-0.026553	1.4987	1.6835	1.4908	NaN	NaN	NaN
-0.026503	1.4987	1.6835	1.4894	NaN	NaN	NaN
-0.026453	1.4993	1.6835	1.4814	NaN	NaN	NaN
-0.026404	1.4993	1.6835	1.4879	NaN	NaN	NaN
-0.026354	1.4966	1.6831	1.4866	NaN	NaN	NaN
-0.026304	1.494	1.6831	1.4845	NaN	NaN	NaN
-0.026254	1.4921	1.6831	1.4898	NaN	NaN	NaN
-0.026204	1.4894	1.6824	1.4898	NaN	NaN	NaN
-0.026155	1.4894	1.6824	1.4898	NaN	NaN	NaN
-0.026105	1.4921	1.6831	1.4919	NaN	NaN	NaN
-0.026055	1.4949	1.6831	1.4919	NaN	NaN	NaN
-0.026005	1.4949	1.6831	1.4908	NaN	NaN	NaN
-0.025955	1.4949	1.682	1.4894	NaN	NaN	NaN
-0.025905	1.4942	1.6785	1.4828	NaN	NaN	NaN
-0.025856	1.4926	1.6785	1.4828	NaN	NaN	NaN
-0.025806	1.4959	1.6656	1.4862	NaN	NaN	NaN
-0.025756	1.4972	1.6793	1.4891	NaN	NaN	NaN
-0.025706	1.4972	1.6793	1.4831	NaN	NaN	NaN
-0.025656	1.4972	1.6793	1.4831	NaN	NaN	NaN
-0.025607	1.4972	1.6793	1.4767	NaN	NaN	NaN
-0.025557	1.4942	1.6793	1.4696	NaN	NaN	NaN
-0.025507	1.4867	1.6793	1.4652	NaN	NaN	NaN
-0.025457	1.4861	1.6656	1.4744	NaN	NaN	NaN
-0.025407	1.4829	1.6534	1.4774	NaN	NaN	NaN
-0.025357	1.48	1.648	1.4839	NaN	NaN	NaN
-0.025308	1.4757	1.648	1.4885	NaN	NaN	NaN
-0.025258	1.4758	1.6534	1.486	NaN	NaN	NaN
-0.025208	1.4743	1.6534	1.4784	NaN	NaN	NaN
-0.025158	1.4726	1.6534	1.4685	NaN	NaN	NaN
-0.025108	1.4694	1.6656	1.4736	NaN	NaN	NaN
-0.025059	1.4739	1.6793	1.4837	NaN	NaN	NaN
-0.025009	1.4749	1.6793	1.487	NaN	NaN	NaN
-0.024959	1.4749	1.6793	1.4908	NaN	NaN	NaN
-0.024909	1.4758	1.685	1.486	NaN	NaN	NaN
-0.024859	1.4774	1.6816	1.4757	NaN	NaN	NaN
-0.024809	1.4814	1.6686	1.4734	NaN	NaN	NaN
-0.02476	1.4844	1.6686	1.4786	NaN	NaN	NaN
-0.02471	1.4814	1.6816	1.4774	NaN	NaN	NaN
-0.02466	1.48	1.6816	1.4755	NaN	NaN	NaN
-0.02461	1.4787	1.6835	1.4702	NaN	NaN	NaN
-0.02456	1.4802	1.6858	1.4665	NaN	NaN	NaN
-0.024511	1.4772	1.6858	1.4595	NaN	NaN	NaN
-0.024461	1.4772	1.6858	1.436	NaN	NaN	NaN
-0.024411	1.4762	1.6957	1.4089	NaN	NaN	NaN
-0.024361	1.4736	1.6957	1.4019	NaN	NaN	NaN
-0.024311	1.4732	1.6957	1.4019	NaN	NaN	NaN
-0.024261	1.4749	1.6957	1.3944	NaN	NaN	NaN
-0.024212	1.4728	1.7022	1.3933	NaN	NaN	NaN
-0.024162	1.4713	1.7022	1.3965	NaN	NaN	NaN
-0.024112	1.4674	1.7022	1.3956	NaN	NaN	NaN
-0.024062	1.4652	1.7022	1.3916	NaN	NaN	NaN
-0.024012	1.4633	1.7064	1.3916	NaN	NaN	NaN
-0.023963	1.4671	1.7052	1.3897	NaN	NaN	NaN
-0.023913	1.4665	1.6908	1.3843	NaN	NaN	NaN
-0.023863	1.4661	1.7052	1.3807	NaN	NaN	NaN
-0.023813	1.4652	1.7041	1.3849	NaN	NaN	NaN
-0.023763	1.4619	1.706	1.3979	NaN	NaN	NaN
-0.023713	1.464	1.7098	1.4059	NaN	NaN	NaN
-0.023664	1.4608	1.7163	1.3988	NaN	NaN	NaN
-0.023614	1.4594	1.7098	1.3988	NaN	NaN	NaN
-0.023564	1.4583	1.7041	1.3998	NaN	NaN	NaN
-0.023514	1.4551	1.7041	1.4053	NaN	NaN	NaN
-0.023464	1.4528	1.6999	1.4147	NaN	NaN	NaN
-0.023415	1.4528	1.6999	1.4168	NaN	NaN	NaN
-0.023365	1.4528	1.6999	1.4128	NaN	NaN	NaN
-0.023315	1.4528	1.7098	1.4128	NaN	NaN	NaN
-0.023265	1.4528	1.7098	1.4128	NaN	NaN	NaN
-0.023215	1.4583	1.7045	1.4128	NaN	NaN	NaN
-0.023165	1.4602	1.7045	1.4091	NaN	NaN	NaN
-0.023116	1.4602	1.7045	1.4011	NaN	NaN	NaN
-0.023066	1.4583	1.7098	1.3861	NaN	NaN	NaN
-0.023016	1.4602	1.7098	1.3861	NaN	NaN	NaN
-0.022966	1.457	1.7098	1.4011	NaN	NaN	NaN
-0.022916	1.4631	1.7098	1.4061	NaN	NaN	NaN
-0.022867	1.4631	1.7098	1.4097	NaN	NaN	NaN
-0.022817	1.4646	1.7167	1.4164	NaN	NaN	NaN
-0.022767	1.4633	1.7167	1.4187	NaN	NaN	NaN
-0.022717	1.4606	1.7167	1.4187	NaN	NaN	NaN
-0.022667	1.4598	1.7205	1.4095	2	2	2
-0.022617	1.4604	1.7159	1.4017	2	2	2
-0.022568	1.4581	1.7159	1.4118	2	2	2
-0.022518	1.4552	1.7224	1.4225	2	2	2
-0.022468	1.4631	1.7224	1.428	2	2	2
-0.022418	1.4631	1.7224	1.428	2	2	2
-0.022368	1.4631	1.7278	1.428	2	2	2
-0.022319	1.456	1.7278	1.4341	2	2	2
-0.022269	1.456	1.7224	1.4341	2	2	2
-0.022219	1.4581	1.7159	1.4397	2	2	2
-0.022169	1.4572	1.6999	1.4425	2	2	2
-0.022119	1.4606	1.7033	1.4488	2	2	2
-0.022069	1.4606	1.698	1.4606	2	2	2
-0.02202	1.4657	1.698	1.4597	2	2	2
-0.02197	1.4638	1.6759	1.4597	2	2	2
-0.02192	1.4617	1.6713	1.4597	2	2	2
-0.02187	1.4617	1.666	1.4488	2	2	2
-0.02182	1.4638	1.6625	1.4425	2	2	2
-0.021771	1.4642	1.6625	1.4425	2	2	2
-0.021721	1.4654	1.6625	1.4439	2	2	2
-0.021671	1.4661	1.666	1.4448	2	2	2
-0.021621	1.4682	1.666	1.4467	2	2	2
-0.021571	1.4703	1.6713	1.4452	2	2	2
-0.021521	1.4703	1.6682	1.4376	2	2	2
-0.021472	1.4703	1.666	1.4347	2	2	2
-0.021422	1.4703	1.666	1.4376	2	2	2
-0.021372	1.4713	1.666	1.4337	2	2	2
-0.021322	1.4718	1.6682	1.4337	2	2	2
-0.021272	1.4718	1.6721	1.4313	2	2	2
-0.021223	1.4718	1.6682	1.4288	2	2	2
-0.021173	1.4736	1.666	1.4288	2	2	2
-0.021123	1.4736	1.666	1.4208	2	2	2
-0.021073	1.477	1.666	1.4173	2	2	2
-0.021023	1.4798	1.6682	1.415	2	2	2
-0.020973	1.4804	1.6728	1.412	2	2	2
-0.020924	1.4814	1.6778	1.4059	2	2	2
-0.020874	1.4812	1.6778	1.4141	2	2	2
-0.020824	1.4812	1.6728	1.4229	2	2	2
-0.020774	1.4812	1.6682	1.4267	2	2	2
-0.020724	1.4812	1.666	1.4349	2	2	2
-0.020675	1.4821	1.6625	1.4458	2	2	2
-0.020625	1.481	1.6599	1.4488	2	2	2
-0.020575	1.4821	1.6599	1.4477	2	2	2
-0.020525	1.4806	1.6599	1.445	2	2	2
-0.020475	1.4808	1.6599	1.4473	2	2	2
-0.020425	1.4749	1.6599	1.4473	2	2	2
-0.020376	1.4749	1.6599	1.4524	2	2	2
-0.020326	1.4829	1.6625	1.4551	2	2	2
-0.020276	1.4772	1.666	1.4578	2	2	2
-0.020226	1.4772	1.666	1.4707	2	2	2
-0.020176	1.486	1.6682	1.4885	2	2	2
-0.020127	1.468	1.6705	1.5064	2	2	2
-0.020077	1.4772	1.6709	1.5093	2	2	2
-0.020027	1.4772	1.6709	1.4999	2	2	2
-0.019977	1.4674	1.6732	1.4965	2	2	2
-0.019927	1.4694	1.6652	1.506	2	2	2
-0.019877	1.4594	1.6629	1.5226	2	2	2
-0.019828	1.4728	1.6709	1.5362	2	2	2
-0.019778	1.4736	1.682	1.5444	2	2	2
-0.019728	1.4636	1.682	1.5444	2	2	2
-0.019678	1.4697	1.682	1.5444	2	2	2
-0.019628	1.4613	1.685	1.5516	2	2	2
-0.019579	1.4674	1.685	1.5541	2	2	2
-0.019529	1.4644	1.685	1.5621	2	2	2
-0.019479	1.464	1.6942	1.5665	2	2	2
-0.019429	1.4715	1.6988	1.564	2	2	2
-0.019379	1.4833	1.6961	1.564	2	2	2
-0.019329	1.4875	1.6961	1.5665	2	2	2
-0.01928	1.4875	1.6988	1.572	2	2	2
-0.01923	1.4833	1.7049	1.5802	2	2	2
-0.01918	1.4833	1.6999	1.581	2	2	2
-0.01913	1.4833	1.6999	1.5785	2	2	2
-0.01908	1.4875	1.7049	1.5686	2	2	2
-0.019031	1.49	1.7052	1.5701	2	2	2
-0.018981	1.4875	1.7052	1.5566	2	2	2
-0.018931	1.4833	1.7052	1.5468	2	2	2
-0.018881	1.4833	1.703	1.557	2	2	2
-0.018831	1.4875	1.6942	1.5468	2	2	2
-0.018781	1.4797	1.682	1.5468	2	2	2
-0.018732	1.473	1.682	1.5407	2	2	2
-0.018682	1.473	1.682	1.5386	2	2	2
-0.018632	1.473	1.682	1.539	2	2	2
-0.018582	1.473	1.6721	1.5432	2	2	2
-0.018532	1.473	1.6427	1.5432	2	2	2
-0.018483	1.473	1.624	1.5409	2	2	2
-0.018433	1.4797	1.624	1.5455	2	2	2
-0.018383	1.4882	1.6217	1.5478	2	2	2
-0.018333	1.4863	1.6217	1.5478	2	2	2
-0.018283	1.4837	1.6255	1.5478	2	2	2
-0.018233	1.4812	1.6343	1.5478	2	2	2
-0.018184	1.4777	1.6438	1.5491	2	2	2
-0.018134	1.4802	1.6438	1.5491	2	2	2
-0.018084	1.4802	1.6438	1.5428	2	2	2
-0.018034	1.4812	1.6438	1.5364	2	2	2
-0.017984	1.4812	1.6331	1.5428	2	2	2
-0.017935	1.4802	1.6217	1.5428	2	2	2
-0.017885	1.4837	1.6217	1.5415	2	2	2
-0.017835	1.4888	1.6331	1.5285	2	2	2
-0.017785	1.4915	1.6217	1.5303	2	2	2
-0.017735	1.4915	1.6209	1.5251	2	2	2
-0.017685	1.4915	1.6209	1.5219	2	2	2
-0.017636	1.4987	1.6331	1.5169	2	2	2
-0.017586	1.4968	1.6331	1.5125	2	2	2
-0.017536	1.4968	1.6331	1.5102	2	2	2
-0.017486	1.501	1.6331	1.5098	2	2	2
-0.017436	1.5035	1.6438	1.5131	2	2	2
-0.017387	1.501	1.6476	1.5167	2	2	2
-0.017337	1.5018	1.6537	1.5245	2	2	2
-0.017287	1.5033	1.6679	1.5245	2	2	2
-0.017237	1.5083	1.6793	1.5192	2	2	2
-0.017187	1.5083	1.6805	1.5089	2	2	2
-0.017137	1.5083	1.6805	1.5051	2	2	2
-0.017088	1.5125	1.6805	1.4997	2	2	2
-0.017038	1.5159	1.6805	1.4942	2	2	2
-0.016988	1.5159	1.6766	1.4942	2	2	2
-0.016938	1.5144	1.6698	1.4967	2	2	2
-0.016888	1.5144	1.6606	1.502	2	2	2
-0.016839	1.5125	1.6606	1.5051	2	2	2
-0.016789	1.5071	1.6698	1.502	2	2	2
-0.016739	1.509	1.6766	1.4984	2	2	2
-0.016689	1.5132	1.6793	1.4944	2	2	2
-0.016639	1.5144	1.6766	1.4944	2	2	2
-0.016589	1.5106	1.6698	1.4919	2	2	2
-0.01654	1.5096	1.6606	1.4915	2	2	2
-0.01649	1.5096	1.6606	1.4915	2	2	2
-0.01644	1.5096	1.6606	1.4938	2	2	2
-0.01639	1.5079	1.6698	1.4938	2	2	2
-0.01634	1.5031	1.6766	1.4938	2	2	2
-0.016291	1.5079	1.6805	1.4986	2	2	2
-0.016241	1.5113	1.6839	1.5018	2	2	2
-0.016191	1.5113	1.6885	1.5022	2	2	2
-0.016141	1.5113	1.693	1.4999	2	2	2
-0.016091	1.5149	1.7083	1.4971	2	2	2
-0.016041	1.5176	1.693	1.4982	2	2	2
-0.015992	1.5119	1.6885	1.5011	2	2	2
-0.015942	1.5066	1.6885	1.4982	2	2	2
-0.015892	1.5031	1.6885	1.4931	2	2	2
-0.015842	1.5027	1.6885	1.4971	2	2	2
-0.015792	1.5027	1.6885	1.5041	2	2	2
-0.015743	1.5056	1.693	1.5148	2	2	2
-0.015693	1.5056	1.7018	1.5091	2	2	2
-0.015643	1.5027	1.7159	1.5047	2	2	2
-0.015593	1.5027	1.7274	1.5013	2	2	2
-0.015543	1.4938	1.7388	1.4997	2	2	2
-0.015493	1.4938	1.7449	1.4974	2	2	2
-0.015444	1.4938	1.7449	1.5011	2	2	2
-0.015394	1.4844	1.7388	1.5018	2	2	2
-0.015344	1.4844	1.7297	1.4936	2	2	2
-0.015294	1.4827	1.7266	1.4936	2	2	2
-0.015244	1.4779	1.7297	1.4936	2	2	2
-0.015195	1.4707	1.7297	1.4862	2	2	2
-0.015145	1.4621	1.7297	1.4812	2	2	2
-0.015095	1.4579	1.7384	1.4812	2	2	2
-0.015045	1.4549	1.7384	1.4854	2	2	2
-0.014995	1.4539	1.7297	1.4816	2	2	2
-0.014945	1.4524	1.7236	1.4784	2	2	2
-0.014896	1.4524	1.7236	1.4734	2	2	2
-0.014846	1.4524	1.7236	1.4679	2	2	2
-0.014796	1.4526	1.7236	1.4614	2	2	2
-0.014746	1.4541	1.7213	1.4614	2	2	2
-0.014696	1.4554	1.7136	1.4656	2	2	2
-0.014647	1.4581	1.7136	1.4734	2	2	2
-0.014597	1.457	1.7121	1.4656	2	2	2
-0.014547	1.4556	1.7003	1.4614	2	2	2
-0.014497	1.457	1.7022	1.4541	2	2	2
-0.014447	1.4556	1.7022	1.4583	2	2	2
-0.014397	1.4541	1.7022	1.4639	2	2	2
-0.014348	1.4541	1.7022	1.4532	2	2	2
-0.014298	1.4566	1.7091	1.449	2	2	2
-0.014248	1.4484	1.7091	1.4532	2	2	2
-0.014198	1.4484	1.7091	1.4595	2	2	2
-0.014148	1.4509	1.7167	1.4641	2	2	2
-0.014099	1.4598	1.7167	1.4553	2	2	2
-0.014049	1.4541	1.7167	1.4513	2	2	2
-0.013999	1.447	1.7228	1.4374	2	2	2
-0.013949	1.447	1.7236	1.4366	2	2	2
-0.013899	1.4541	1.7236	1.4408	2	2	2
-0.013849	1.4509	1.722	1.448	2	2	2
-0.0138	1.4409	1.7121	1.4471	2	2	2
-0.01375	1.4385	1.7102	1.4465	2	2	2
-0.0137	1.4484	1.7102	1.4465	2	2	2
-0.01365	1.4541	1.701	1.4534	2	2	2
-0.0136	1.4566	1.701	1.4562	2	2	2
-0.013551	1.4566	1.701	1.4545	2	2	2
-0.013501	1.457	1.7045	1.4545	2	2	2
-0.013451	1.4602	1.703	1.4547	2	2	2
-0.013401	1.46	1.6965	1.454	2	2	2
-0.013351	1.46	1.6908	1.4492	2	2	2
-0.013301	1.4501	1.6808	1.4492	2	2	2
-0.013252	1.4396	1.6808	1.453	2	2	2
-0.013202	1.4396	1.6919	1.4511	2	2	2
-0.013152	1.4501	1.7049	1.4511	2	2	2
-0.013102	1.451	1.7049	1.4564	2	2	2
-0.013052	1.451	1.7049	1.4572	2	2	2
-0.013003	1.4522	1.6934	1.4536	2	2	2
-0.012953	1.453	1.6862	1.4532	2	2	2
-0.012903	1.451	1.6862	1.4559	2	2	2
-0.012853	1.451	1.6934	1.4706	2	2	2
-0.012803	1.4575	1.701	1.4608	2	2	2
-0.012753	1.4543	1.6934	1.4559	2	2	2
-0.012704	1.4568	1.6934	1.4578	1.9192	1.9	1.9092
-0.012654	1.4633	1.6843	1.4578	1.9192	1.8	1.9132
-0.012604	1.4568	1.6732	1.454	1.9192	1.85	1.9132
-0.012554	1.4592	1.6732	1.4532	1.9104	1.91	1.9082
-0.012504	1.4657	1.6732	1.454	1.9104	1.843	1.9074
-0.012455	1.4697	1.6686	1.454	1.9104	1.88	1.9074
-0.012405	1.4697	1.6644	1.4568	1.9104	1.8775	1.9082
-0.012355	1.4722	1.6625	1.4633	1.9192	1.89	1.9137
-0.012305	1.4676	1.6721	1.4646	1.9104	1.8943	1.9118
-0.012255	1.4549	1.6721	1.4646	1.9104	1.913	1.913
-0.012205	1.4514	1.6721	1.469	1.9104	1.7374	1.9074
-0.012156	1.453	1.6656	1.4698	1.9104	1.7456	1.9019
-0.012106	1.4592	1.6656	1.4685	1.9104	1.747	1.908
-0.012056	1.4577	1.6721	1.4713	1.9104	1.7487	1.913
-0.012006	1.4499	1.6793	1.4744	1.9104	1.7578	1.9225
-0.011956	1.4562	1.6793	1.4715	1.9104	1.7578	1.9231
-0.011907	1.4623	1.6793	1.4732	1.9104	1.774	1.9231
-0.011857	1.4642	1.6793	1.4786	1.9092	1.7853	1.9225
-0.011807	1.4678	1.6721	1.4847	1.8993	1.7966	1.9235
-0.011757	1.4688	1.6694	1.4902	1.9092	1.8111	1.9235
-0.011707	1.4688	1.6694	1.4879	1.9226	1.82	1.9204
-0.011657	1.4678	1.6694	1.4814	1.9283	1.8299	1.925
-0.011608	1.4671	1.6721	1.4847	1.931	1.832	1.9286
-0.011558	1.4688	1.6721	1.4967	1.931	1.8334	1.9278
-0.011508	1.4688	1.6721	1.4997	1.9321	1.8355	1.9278
-0.011458	1.4692	1.6721	1.5003	1.9401	1.8383	1.9286
-0.011408	1.4663	1.6721	1.4952	1.942	1.8362	1.9301
-0.011359	1.4676	1.6694	1.4896	1.9516	1.8395	1.9301
-0.011309	1.4705	1.6644	1.486	1.9714	1.844	1.938
-0.011259	1.4709	1.6644	1.486	1.9878	1.8471	1.9416
-0.011209	1.4709	1.6541	1.486	1.9943	1.8502	1.9416
-0.011159	1.4736	1.6438	1.4959	1.9943	1.8557	1.936
-0.011109	1.4736	1.6438	1.5089	1.9943	1.8656	1.936
-0.01106	1.4707	1.6438	1.5129	2.0023	1.8717	1.9364
-0.01101	1.4707	1.6438	1.5129	2.0107	1.873	1.941
-0.01096	1.4707	1.6358	1.5259	2.0145	1.8753	1.9444
-0.01091	1.4736	1.6358	1.5217	2.0164	1.8778	1.9532
-0.01086	1.4749	1.6358	1.5175	2.0244	1.8839	1.9551
-0.010811	1.4781	1.6358	1.5175	2.0347	1.8881	1.957
-0.010761	1.4781	1.6244	1.5217	2.0408	1.8891	1.9631
-0.010711	1.4781	1.6068	1.5262	2.0477	1.8891	1.9732
-0.010661	1.4781	1.5958	1.5268	2.0527	1.8891	1.9826
-0.010611	1.4831	1.5958	1.5184	2.0477	1.8906	1.9895
-0.010561	1.4831	1.5855	1.5213	2.0527	1.8934	1.9895
-0.010512	1.4869	1.5855	1.5255	2.0527	1.894	2.0026
-0.010462	1.4896	1.5958	1.5228	2.0527	1.8969	2.0026
-0.010412	1.4869	1.5958	1.5226	2.0477	1.8975	2.0085
-0.010362	1.4863	1.5855	1.52	2.0477	1.9003	2.0133
-0.010312	1.4863	1.5958	1.5138	2.0531	1.907	2.0184
-0.010263	1.4896	1.5958	1.5138	2.0531	1.9127	2.0184
-0.010213	1.4896	1.5958	1.5138	2.0531	1.9175	2.0198
-0.010163	1.4865	1.5855	1.5138	2.0531	1.9219	2.0167
-0.010113	1.4903	1.5744	1.5138	2.055	1.9219	2.0167
-0.010063	1.4957	1.5706	1.5119	2.0531	1.9234	2.0244
-0.010013	1.4903	1.5675	1.4995	2.0531	1.9255	2.032
-0.0099636	1.4903	1.5668	1.5009	2.055	1.9274	2.0341
-0.0099138	1.4961	1.5656	1.4967	2.055	1.9306	2.0308
-0.009864	1.4957	1.5534	1.4923	2.055	1.9358	2.0287
-0.0098142	1.5016	1.5408	1.4921	2.055	1.9379	2.0308
-0.0097644	1.5016	1.5359	1.4965	2.055	1.9371	2.0308
-0.0097145	1.5016	1.5359	1.4921	2.055	1.9449	2.0308
-0.0096647	1.4989	1.5202	1.4912	2.055	1.9469	2.0316
-0.0096149	1.4922	1.4977	1.49	2.0561	1.9484	2.0347
-0.0095651	1.4949	1.4844	1.4885	2.0584	1.9484	2.0379
-0.0095153	1.5024	1.4844	1.4843	2.0561	1.951	2.0398
-0.0094655	1.4949	1.4798	1.4793	2.055	1.9549	2.0398
-0.0094156	1.4949	1.4767	1.4751	2.0531	1.9581	2.0415
-0.0093658	1.5016	1.4767	1.4665	2.0531	1.9593	2.039
-0.009316	1.4989	1.4676	1.4641	2.0531	1.956	2.039
-0.0092662	1.4963	1.4573	1.4641	2.055	1.956	2.0379
-0.0092164	1.4989	1.4523	1.4627	2.0561	1.956	2.0421
-0.0091665	1.4922	1.4523	1.4627	2.055	1.956	2.0421
-0.0091167	1.4949	1.4523	1.4587	2.0515	1.956	2.0448
-0.0090669	1.4953	1.4523	1.4566	2.0382	1.956	2.0461
-0.0090171	1.5024	1.4523	1.4604	2.0454	1.956	2.0511
-0.0089673	1.5024	1.4523	1.4631	2.0515	1.952	2.0455
-0.0089175	1.5035	1.4523	1.4585	2.0515	1.948	2.0455
-0.0088676	1.5008	1.4523	1.4507	2.0515	1.9461	2.0455
-0.0088178	1.4964	1.4523	1.4652	2.0672	1.948	2.0511
-0.008768	1.4892	1.4523	1.4652	2.0756	1.952	2.0545
-0.0087182	1.4892	1.4508	1.4629	2.0756	1.952	2.0545
-0.0086684	1.4833	1.4508	1.4629	2.0687	1.9566	2.0602
-0.0086185	1.4879	1.4508	1.4692	2.0687	1.952	2.0593
-0.0085687	1.4943	1.4508	1.4707	2.0687	1.948	2.0549
-0.0085189	1.4934	1.4508	1.4694	2.0637	1.9528	2.0505
-0.0084691	1.4909	1.4458	1.4622	2.0637	1.9528	2.048
-0.0084193	1.4909	1.442	1.457	2.066	1.9528	2.0543
-0.0083695	1.4943	1.442	1.4633	2.0695	1.956	2.0499
-0.0083196	1.4976	1.4458	1.4583	2.0695	1.9543	2.0436
-0.0082698	1.4987	1.4508	1.4583	2.0695	1.9499	2.0402
-0.00822	1.4976	1.4508	1.4633	2.0767	1.9461	2.0383
-0.0081702	1.4987	1.4432	1.4572	2.0767	1.9461	2.0377
-0.0081204	1.4976	1.4432	1.4572	2.0767	1.9543	2.0402
-0.0080705	1.4987	1.4432	1.4603	2.0809	1.9587	2.043
-0.0080207	1.4976	1.4432	1.4553	2.0763	1.9556	2.0429
-0.0079709	1.501	1.4344	1.4515	2.0763	1.9587	2.0432
-0.0079211	1.5094	1.4283	1.4501	2.0763	1.9556	2.0432
-0.0078713	1.5165	1.4283	1.453	2.0809	1.96	2.0514
-0.0078215	1.5165	1.4283	1.4591	2.0809	1.9533	2.0511
-0.0077716	1.5115	1.4317	1.4583	2.0809	1.944	2.0514
-0.0077218	1.5094	1.4367	1.4643	2.0878	1.9497	2.0436
-0.007672	1.5115	1.4432	1.4582	2.0809	1.9512	2.0432
-0.0076222	1.5094	1.4512	1.4566	2.0763	1.9566	2.0492
-0.0075724	1.501	1.4577	1.4534	2.0763	1.9465	2.057
-0.0075225	1.501	1.4512	1.4551	2.0809	1.9299	2.057
-0.0074727	1.4987	1.4405	1.4637	2.0809	1.9411	2.0593
-0.0074229	1.4943	1.4317	1.4671	2.0809	1.9512	2.0593
-0.0073731	1.4976	1.4405	1.4734	2.0862	1.9442	2.0593
-0.0073233	1.4976	1.4512	1.474	2.0927	1.9411	2.0612
-0.0072735	1.502	1.4512	1.474	2.0862	1.9493	2.0709
-0.0072236	1.502	1.4512	1.4732	2.0809	1.9388	2.0823
-0.0071738	1.502	1.4615	1.4713	2.0809	1.9331	2.0862
-0.007124	1.4976	1.4687	1.4755	2.0809	1.939	2.0827
-0.0070742	1.4924	1.4687	1.4873	2.0759	1.9472	2.0717
-0.0070244	1.4875	1.4687	1.4847	2.0759	1.943	2.0814
-0.0069745	1.4875	1.4764	1.4913	2.0725	1.9392	2.0839
-0.0069247	1.4875	1.4859	1.4936	2.0691	1.9453	2.0865
-0.0068749	1.4842	1.4859	1.4938	2.0691	1.9465	2.0869
-0.0068251	1.485	1.4859	1.4959	2.0691	1.9491	2.0839
-0.0067753	1.4863	1.4909	1.4938	2.0691	1.952	2.0839
-0.0067255	1.4858	1.4909	1.4917	2.0691	1.9493	2.0833
-0.0066756	1.4858	1.4909	1.4898	2.0691	1.9503	2.0823
-0.0066258	1.4884	1.4931	1.4917	2.0725	1.9461	2.0778
-0.006576	1.4905	1.5023	1.4976	2.0771	1.9461	2.0705
-0.0065262	1.4879	1.5023	1.4925	2.0771	1.9501	2.0656
-0.0064764	1.4848	1.5023	1.4891	2.0725	1.9459	2.0686
-0.0064265	1.4848	1.5023	1.4881	2.0725	1.9501	2.0663
-0.0063767	1.4886	1.5195	1.4881	2.0725	1.9549	2.0562
-0.0063269	1.4886	1.5446	1.4879	2.0691	1.9552	2.0657
-0.0062771	1.4886	1.5706	1.4883	2.066	1.9564	2.0629
-0.0062273	1.4932	1.5866	1.4883	2.066	1.9568	2.0482
-0.0061775	1.4978	1.5954	1.4883	2.0634	1.9583	2.0549
-0.0061276	1.4894	1.5904	1.4879	2.0634	1.9583	2.0549
-0.0060778	1.4932	1.5836	1.487	2.0634	1.9587	2.0503
-0.006028	1.5016	1.5706	1.4711	2.0634	1.9619	2.0467
-0.0059782	1.4978	1.5706	1.4541	2.0523	1.9606	2.0516
-0.0059284	1.4942	1.5706	1.4706	2.0386	1.9613	2.0423
-0.0058785	1.4921	1.5706	1.4654	2.0386	1.9619	2.0408
-0.0058287	1.4884	1.5706	1.4484	2.0283	1.9621	2.0396
-0.0057789	1.4932	1.5797	1.4522	2.0229	1.9606	2.0385
-0.0057291	1.4917	1.5797	1.4578	2.0126	1.9619	2.0394
-0.0056793	1.4913	1.5797	1.4646	2.0126	1.9638	2.0385
-0.0056295	1.4913	1.5836	1.4675	2.0099	1.9659	2.0335
-0.0055796	1.4968	1.5904	1.4675	2.0099	1.9711	2.0314
-0.0055298	1.4968	1.5954	1.4732	2.0023	1.972	2.0341
-0.00548	1.4989	1.5954	1.462	1.9943	1.9667	2.0366
-0.0054302	1.4978	1.5954	1.4458	1.9871	1.9667	2.0366
-0.0053804	1.4957	1.5954	1.4385	1.9859	1.9659	2.0369
-0.0053305	1.4884	1.5931	1.4385	1.9859	1.9728	2.0369
-0.0052807	1.4783	1.59	1.4225	1.9871	1.9745	2.0362
-0.0052309	1.4879	1.5836	1.417	1.9871	1.9755	2.0369
-0.0051811	1.4858	1.5797	1.417	1.9859	1.9753	2.0347
-0.0051313	1.4884	1.5797	1.4135	1.9859	1.9783	2.0356
-0.0050815	1.4963	1.5797	1.417	1.9817	1.9804	2.0379
-0.0050316	1.4961	1.5797	1.4238	1.9638	1.9858	2.0379
-0.0049818	1.4961	1.5797	1.417	1.9638	1.9804	2.0347
-0.004932	1.4963	1.5797	1.4099	1.9638	1.981	2.0324
-0.0048822	1.4963	1.5836	1.4143	1.9638	1.9833	2.0329
-0.0048324	1.4963	1.59	1.42	1.9462	1.9854	2.0339
-0.0047825	1.4995	1.59	1.4278	1.9462	1.9854	2.0339
-0.0047327	1.5043	1.5836	1.4278	1.9462	1.9831	2.0339
-0.0046829	1.5043	1.5797	1.4389	1.9428	1.9848	2.0354
-0.0046331	1.5037	1.5797	1.4566	1.9428	1.9902	2.0354
-0.0045833	1.4974	1.5797	1.4603	1.9462	1.9921	2.0333
-0.0045335	1.498	1.5797	1.4603	1.9417	1.9945	2.0333
-0.0044836	1.5045	1.5797	1.4614	1.9417	1.9984	2.0379
-0.0044338	1.4974	1.5797	1.4643	1.9462	1.9993	2.0438
-0.004384	1.4974	1.5836	1.4637	1.9562	1.9989	2.0364
-0.0043342	1.5045	1.59	1.4696	1.9562	1.9915	2.0308
-0.0042844	1.505	1.6045	1.4778	1.9562	1.9915	2.0293
-0.0042345	1.5058	1.6167	1.4747	1.9562	1.9846	2.0261
-0.0041847	1.5115	1.6198	1.4747	1.9462	1.9917	2.0217
-0.0041349	1.5048	1.6198	1.4747	1.9417	2.002	2.0217
-0.0040851	1.5079	1.6198	1.4837	1.9363	2.0113	2.0188
-0.0040353	1.5212	1.6198	1.487	1.9417	2.0142	2.0188
-0.0039855	1.5212	1.6198	1.4942	1.9417	2.0142	2.019
-0.0039356	1.5048	1.6198	1.4963	1.9363	2.0117	2.0221
-0.0038858	1.509	1.6198	1.4933	1.9363	2.0123	2.0249
-0.003836	1.5327	1.6187	1.483	1.9306	2.0123	2.0205
-0.0037862	1.5376	1.6187	1.483	1.9306	2.0123	2.0205
-0.0037364	1.5245	1.6396	1.494	1.9306	2.0146	2.0253
-0.0036865	1.5178	1.656	1.4933	1.9306	2.0191	2.0278
-0.0036367	1.5342	1.64	1.4963	1.9363	2.0191	2.0305
-0.0035869	1.5178	1.6187	1.4963	1.9306	2.0174	2.0354
-0.0035371	1.5209	1.64	1.4971	1.9287	2.0163	2.0356
-0.0034873	1.5222	1.6499	1.494	1.9306	2.0146	2.0339
-0.0034375	1.5313	1.6896	1.495	1.9306	2.0146	2.0362
-0.0033876	1.5313	1.7182	1.495	1.9287	2.013	2.0387
-0.0033378	1.5256	1.7411	1.4992	1.9306	2.0031	2.0366
-0.003288	1.5256	1.7533	1.503	1.9348	2.0031	2.0366
-0.0032382	1.5352	1.751	1.5022	1.9348	2.0027	2.0392
-0.0031884	1.5445	1.7434	1.4871	1.9348	1.9966	2.0436
-0.0031385	1.5374	1.7442	1.4759	1.9306	1.9919	2.0436
-0.0030887	1.5304	1.7422	1.4742	1.9287	1.9871	2.0419
-0.0030389	1.5392	1.7274	1.4749	1.9306	1.9846	2.0415
-0.0029891	1.535	1.7178	1.4759	1.9348	1.9774	2.0465
-0.0029393	1.5395	1.7178	1.4759	1.9401	1.9722	2.0533
-0.0028895	1.5374	1.7178	1.4759	1.9462	1.9654	2.0558
-0.0028396	1.5447	1.7197	1.4774	1.9462	1.9575	2.0575
-0.0027898	1.5493	1.7197	1.4799	1.9401	1.9509	2.0575
-0.00274	1.5502	1.7041	1.4799	1.9356	1.9499	2.0621
-0.0026902	1.5556	1.7041	1.4812	1.9356	1.9463	2.0635
-0.0026404	1.5502	1.7087	1.4816	1.934	1.9383	2.0633
-0.0025905	1.5495	1.7087	1.483	1.934	1.9331	2.0625
-0.0025407	1.5554	1.7091	1.4805	1.934	1.9312	2.0657
-0.0024909	1.5611	1.7091	1.4892	1.934	1.9215	2.0717
-0.0024411	1.5678	1.7091	1.5013	1.9333	1.9163	2.0717
-0.0023913	1.5622	1.7091	1.5163	1.9306	1.9127	2.0703
-0.0023415	1.5664	1.7091	1.5232	1.9333	1.9022	2.0747
-0.0022916	1.5664	1.6953	1.5268	1.934	1.8944	2.076
-0.0022418	1.5758	1.6827	1.5268	1.9356	1.8864	2.0732
-0.002192	1.5914	1.6793	1.5146	1.9462	1.8801	2.0732
-0.0021422	1.6002	1.6717	1.5146	1.9386	1.8778	2.0736
-0.0020924	1.6042	1.6671	1.5146	1.9356	1.8767	2.0736
-0.0020425	1.6042	1.6618	1.5268	1.9386	1.8782	2.0728
-0.0019927	1.6065	1.6511	1.5436	1.9356	1.8742	2.0698
-0.0019429	1.6065	1.6511	1.5419	1.9356	1.8584	2.0701
-0.0018931	1.6052	1.6511	1.5482	1.9356	1.8509	2.0696
-0.0018433	1.6063	1.6343	1.5507	1.9356	1.8509	2.0757
-0.0017935	1.6118	1.6179	1.5489	1.9356	1.8425	2.0842
-0.0017436	1.6074	1.6179	1.5383	1.9356	1.8383	2.078
-0.0016938	1.6063	1.6232	1.5398	1.9356	1.8341	2.0852
-0.001644	1.6025	1.6232	1.5406	1.9386	1.8255	2.0896
-0.0015942	1.6084	1.6232	1.5398	1.9386	1.809	2.0896
-0.0015444	1.6063	1.6232	1.5268	1.9356	1.7973	2.0886
-0.0014945	1.6063	1.6187	1.5268	1.934	1.7893	2.0871
-0.0014447	1.6004	1.6114	1.5261	1.934	1.7838	2.0818
-0.0013949	1.593	1.6026	1.5249	1.9314	1.7815	2.0774
-0.0013451	1.5842	1.5946	1.5249	1.9295	1.7737	2.0774
-0.0012953	1.5794	1.5897	1.5217	1.9188	1.7637	2.0774
-0.0012455	1.5769	1.5755	1.515	1.9127	1.7565	2.0722
-0.0011956	1.5769	1.5652	1.506	1.9073	1.7498	2.0684
-0.0011458	1.5729	1.5652	1.4997	1.8974	1.7418	2.0652
-0.001096	1.5708	1.5652	1.4952	1.8917	1.7353	2.0585
-0.0010462	1.5647	1.5637	1.4952	1.8917	1.7319	2.0585
-0.00099636	1.5647	1.5607	1.494	1.889	1.7231	2.0471
-0.00094655	1.5598	1.5416	1.4849	1.889	1.7081	2.0375
-0.00089673	1.5598	1.5103	1.4812	1.889	1.7033	2.0312
-0.00084691	1.5508	1.4905	1.4671	1.8837	1.6899	2.0257
-0.00079709	1.5415	1.46	1.4648	1.8787	1.6749	2.0232
-0.00074727	1.5336	1.434	1.4648	1.8768	1.6722	2.0192
-0.00069745	1.521	1.4314	1.4444	1.8768	1.6701	2.0108
-0.00064764	1.5085	1.4073	1.4288	1.8768	1.6625	1.9992
-0.00059782	1.4983	1.3718	1.4242	1.8768	1.6548	1.9896
-0.000548	1.4762	1.3539	1.4059	1.849	1.6457	1.9832
-0.00049818	1.4499	1.3367	1.3418	1.8078	1.5774	1.9421
-0.00044836	1.4303	1.2955	1.2815	1.7765	1.5003	1.8674
-0.00039855	1.3963	1.2521	1.2258	1.5621	1.2383	1.6757
[truncated: 46,175 more rows]

## Sheet: Fig2-S1C
-0.2	NaN	NaN	-64.591	NaN	NaN	-64.872	NaN	NaN	-64.866	NaN	NaN	-64.389	NaN	NaN	-63.957
-0.1995	NaN	NaN	-64.579	NaN	NaN	-64.85	NaN	NaN	-64.883	NaN	NaN	-64.382	NaN	NaN	-63.968
-0.199	NaN	NaN	-64.568	NaN	NaN	-64.804	NaN	NaN	-64.891	NaN	NaN	-64.378	NaN	NaN	-63.975
-0.19851	NaN	NaN	-64.567	NaN	NaN	-64.773	NaN	NaN	-64.936	NaN	NaN	-64.385	NaN	NaN	-63.98
-0.19801	NaN	NaN	-64.552	NaN	NaN	-64.609	NaN	NaN	-65.022	NaN	NaN	-64.412	NaN	NaN	-63.977
-0.19751	NaN	NaN	-64.542	NaN	NaN	-64.649	NaN	NaN	-65.022	NaN	NaN	-64.376	NaN	NaN	-63.971
-0.19701	NaN	NaN	-64.54	NaN	NaN	-64.628	NaN	NaN	-65.06	NaN	NaN	-64.376	NaN	NaN	-63.977
-0.19651	NaN	NaN	-64.529	NaN	NaN	-64.654	NaN	NaN	-65.04	NaN	NaN	-64.379	NaN	NaN	-63.983
-0.19601	NaN	NaN	-64.506	NaN	NaN	-64.648	NaN	NaN	-65.036	NaN	NaN	-64.447	NaN	NaN	-64.001
-0.19552	NaN	NaN	-64.509	NaN	NaN	-64.63	NaN	NaN	-64.985	NaN	NaN	-64.49	NaN	NaN	-64.001
-0.19502	NaN	NaN	-64.513	NaN	NaN	-64.62	NaN	NaN	-65.003	NaN	NaN	-64.534	NaN	NaN	-64.009
-0.19452	NaN	NaN	-64.544	NaN	NaN	-64.626	NaN	NaN	-65.003	NaN	NaN	-64.589	NaN	NaN	-63.931
-0.19402	NaN	NaN	-64.569	NaN	NaN	-64.622	NaN	NaN	-65.048	NaN	NaN	-64.605	NaN	NaN	-63.878
-0.19352	NaN	NaN	-64.59	NaN	NaN	-64.629	NaN	NaN	-65.106	NaN	NaN	-64.626	NaN	NaN	-63.821
-0.19303	NaN	NaN	-64.571	NaN	NaN	-64.639	NaN	NaN	-65.124	NaN	NaN	-64.673	NaN	NaN	-63.838
-0.19253	NaN	NaN	-64.589	NaN	NaN	-64.608	NaN	NaN	-65.133	NaN	NaN	-64.68	NaN	NaN	-63.82
-0.19203	NaN	NaN	-64.611	NaN	NaN	-64.587	NaN	NaN	-65.138	NaN	NaN	-64.656	NaN	NaN	-63.818
-0.19153	NaN	NaN	-64.651	NaN	NaN	-64.591	NaN	NaN	-65.104	NaN	NaN	-64.626	NaN	NaN	-63.849
-0.19103	NaN	NaN	-64.709	NaN	NaN	-64.566	NaN	NaN	-65.087	NaN	NaN	-64.567	NaN	NaN	-63.91
-0.19053	NaN	NaN	-64.729	NaN	NaN	-64.522	NaN	NaN	-65.087	NaN	NaN	-64.619	NaN	NaN	-64
-0.19004	NaN	NaN	-64.757	NaN	NaN	-64.474	NaN	NaN	-65.087	NaN	NaN	-64.663	NaN	NaN	-64.117
-0.18954	NaN	NaN	-64.776	NaN	NaN	-64.472	NaN	NaN	-65.115	NaN	NaN	-64.688	NaN	NaN	-64.189
-0.18904	NaN	NaN	-64.782	NaN	NaN	-64.487	NaN	NaN	-65.126	NaN	NaN	-64.696	NaN	NaN	-64.235
-0.18854	NaN	NaN	-64.755	NaN	NaN	-64.498	NaN	NaN	-65.13	NaN	NaN	-64.728	NaN	NaN	-64.273
-0.18804	NaN	NaN	-64.765	NaN	NaN	-64.416	NaN	NaN	-65.135	NaN	NaN	-64.749	NaN	NaN	-64.242
-0.18755	NaN	NaN	-64.745	NaN	NaN	-64.384	NaN	NaN	-65.129	NaN	NaN	-64.814	NaN	NaN	-64.259
-0.18705	NaN	NaN	-64.703	NaN	NaN	-64.39	NaN	NaN	-65.11	NaN	NaN	-64.829	NaN	NaN	-64.242
-0.18655	NaN	NaN	-64.674	NaN	NaN	-64.433	NaN	NaN	-65.077	NaN	NaN	-64.857	NaN	NaN	-64.23
-0.18605	NaN	NaN	-64.681	NaN	NaN	-64.432	NaN	NaN	-65.072	NaN	NaN	-64.859	NaN	NaN	-64.18
-0.18555	NaN	NaN	-64.607	NaN	NaN	-64.438	NaN	NaN	-65.026	NaN	NaN	-64.862	NaN	NaN	-64.18
-0.18505	NaN	NaN	-64.575	NaN	NaN	-64.426	NaN	NaN	-65.019	NaN	NaN	-64.814	NaN	NaN	-64.111
-0.18456	NaN	NaN	-64.549	NaN	NaN	-64.426	NaN	NaN	-65.031	NaN	NaN	-64.786	NaN	NaN	-64.039
-0.18406	NaN	NaN	-64.513	NaN	NaN	-64.419	NaN	NaN	-65.049	NaN	NaN	-64.757	NaN	NaN	-64.018
-0.18356	NaN	NaN	-64.535	NaN	NaN	-64.437	NaN	NaN	-65.036	NaN	NaN	-64.749	NaN	NaN	-64.009
-0.18306	NaN	NaN	-64.539	NaN	NaN	-64.46	NaN	NaN	-65.045	NaN	NaN	-64.743	NaN	NaN	-64.067
-0.18256	NaN	NaN	-64.552	NaN	NaN	-64.465	NaN	NaN	-65.058	NaN	NaN	-64.749	NaN	NaN	-64.125
-0.18207	NaN	NaN	-64.57	NaN	NaN	-64.479	NaN	NaN	-65.051	NaN	NaN	-64.765	NaN	NaN	-64.132
-0.18157	NaN	NaN	-64.54	NaN	NaN	-64.477	NaN	NaN	-65.04	NaN	NaN	-64.776	NaN	NaN	-64.16
-0.18107	NaN	NaN	-64.422	NaN	NaN	-64.454	NaN	NaN	-65.089	NaN	NaN	-64.781	NaN	NaN	-64.18
-0.18057	NaN	NaN	-64.28	NaN	NaN	-64.44	NaN	NaN	-64.965	NaN	NaN	-64.791	NaN	NaN	-64.172
-0.18007	NaN	NaN	-64.275	NaN	NaN	-64.487	NaN	NaN	-64.958	NaN	NaN	-64.749	NaN	NaN	-64.171
-0.17957	NaN	NaN	-64.3	NaN	NaN	-64.531	NaN	NaN	-65.061	NaN	NaN	-64.72	NaN	NaN	-64.204
-0.17908	NaN	NaN	-64.343	NaN	NaN	-64.607	NaN	NaN	-65.107	NaN	NaN	-64.715	NaN	NaN	-64.256
-0.17858	NaN	NaN	-64.378	NaN	NaN	-64.673	NaN	NaN	-65.072	NaN	NaN	-64.698	NaN	NaN	-64.238
-0.17808	NaN	NaN	-64.429	NaN	NaN	-64.667	NaN	NaN	-64.978	NaN	NaN	-64.714	NaN	NaN	-64.288
-0.17758	NaN	NaN	-64.423	NaN	NaN	-64.632	NaN	NaN	-64.996	NaN	NaN	-64.753	NaN	NaN	-64.288
-0.17708	NaN	NaN	-64.388	NaN	NaN	-64.628	NaN	NaN	-65.042	NaN	NaN	-64.759	NaN	NaN	-64.285
-0.17659	NaN	NaN	-64.382	NaN	NaN	-64.627	NaN	NaN	-65.071	NaN	NaN	-64.775	NaN	NaN	-64.242
-0.17609	NaN	NaN	-64.366	NaN	NaN	-64.658	NaN	NaN	-64.996	NaN	NaN	-64.793	NaN	NaN	-64.174
-0.17559	NaN	NaN	-64.365	NaN	NaN	-64.651	NaN	NaN	-64.939	NaN	NaN	-64.792	NaN	NaN	-64.107
-0.17509	NaN	NaN	-64.367	NaN	NaN	-64.658	NaN	NaN	-64.886	NaN	NaN	-64.789	NaN	NaN	-64.151
-0.17459	NaN	NaN	-64.389	NaN	NaN	-64.675	NaN	NaN	-64.886	NaN	NaN	-64.811	NaN	NaN	-64.111
-0.17409	NaN	NaN	-64.4	NaN	NaN	-64.693	NaN	NaN	-64.892	NaN	NaN	-64.794	NaN	NaN	-64.073
-0.1736	NaN	NaN	-64.39	NaN	NaN	-64.72	NaN	NaN	-64.872	NaN	NaN	-64.74	NaN	NaN	-64.058
-0.1731	NaN	NaN	-64.439	NaN	NaN	-64.741	NaN	NaN	-64.843	NaN	NaN	-64.734	NaN	NaN	-64.071
-0.1726	NaN	NaN	-64.48	NaN	NaN	-64.778	NaN	NaN	-64.901	NaN	NaN	-64.739	NaN	NaN	-64.055
-0.1721	NaN	NaN	-64.527	NaN	NaN	-64.763	NaN	NaN	-64.86	NaN	NaN	-64.734	NaN	NaN	-64.093
-0.1716	NaN	NaN	-64.564	NaN	NaN	-64.745	NaN	NaN	-64.851	NaN	NaN	-64.743	NaN	NaN	-64.108
-0.17111	NaN	NaN	-64.584	NaN	NaN	-64.718	NaN	NaN	-64.865	NaN	NaN	-64.749	NaN	NaN	-64.108
-0.17061	NaN	NaN	-64.618	NaN	NaN	-64.68	NaN	NaN	-64.823	NaN	NaN	-64.784	NaN	NaN	-64.042
-0.17011	NaN	NaN	-64.555	NaN	NaN	-64.616	NaN	NaN	-64.836	NaN	NaN	-64.835	NaN	NaN	-64.012
-0.16961	NaN	NaN	-64.533	NaN	NaN	-64.568	NaN	NaN	-64.84	NaN	NaN	-64.875	NaN	NaN	-63.952
-0.16911	NaN	NaN	-64.545	NaN	NaN	-64.571	NaN	NaN	-64.828	NaN	NaN	-64.967	NaN	NaN	-63.907
-0.16861	NaN	NaN	-64.615	NaN	NaN	-64.564	NaN	NaN	-64.805	NaN	NaN	-64.946	NaN	NaN	-63.868
-0.16812	NaN	NaN	-64.613	NaN	NaN	-64.592	NaN	NaN	-64.797	NaN	NaN	-64.966	NaN	NaN	-63.868
-0.16762	NaN	NaN	-64.577	NaN	NaN	-64.598	NaN	NaN	-64.817	NaN	NaN	-64.949	NaN	NaN	-63.925
-0.16712	NaN	NaN	-64.582	NaN	NaN	-64.587	NaN	NaN	-64.855	NaN	NaN	-64.94	NaN	NaN	-63.954
-0.16662	NaN	NaN	-64.57	NaN	NaN	-64.543	NaN	NaN	-64.894	NaN	NaN	-64.921	NaN	NaN	-63.98
-0.16612	NaN	NaN	-64.539	NaN	NaN	-64.465	NaN	NaN	-64.942	NaN	NaN	-64.933	NaN	NaN	-64.029
-0.16563	NaN	NaN	-64.517	NaN	NaN	-64.432	NaN	NaN	-64.959	NaN	NaN	-64.937	NaN	NaN	-64.084
-0.16513	NaN	NaN	-64.512	NaN	NaN	-64.501	NaN	NaN	-64.971	NaN	NaN	-64.96	NaN	NaN	-64.026
-0.16463	NaN	NaN	-64.479	NaN	NaN	-64.522	NaN	NaN	-64.974	NaN	NaN	-64.933	NaN	NaN	-63.843
-0.16413	NaN	NaN	-64.438	NaN	NaN	-64.529	NaN	NaN	-64.932	NaN	NaN	-64.953	NaN	NaN	-63.775
-0.16363	NaN	NaN	-64.444	NaN	NaN	-64.496	NaN	NaN	-64.901	NaN	NaN	-64.918	NaN	NaN	-63.789
-0.16313	NaN	NaN	-64.431	NaN	NaN	-64.47	NaN	NaN	-64.849	NaN	NaN	-64.903	NaN	NaN	-63.846
-0.16264	NaN	NaN	-64.432	NaN	NaN	-64.516	NaN	NaN	-64.782	NaN	NaN	-64.917	NaN	NaN	-63.894
-0.16214	NaN	NaN	-64.418	NaN	NaN	-64.523	NaN	NaN	-64.796	NaN	NaN	-64.905	NaN	NaN	-63.85
-0.16164	NaN	NaN	-64.387	NaN	NaN	-64.47	NaN	NaN	-64.833	NaN	NaN	-64.872	NaN	NaN	-63.783
-0.16114	NaN	NaN	-64.327	NaN	NaN	-64.436	NaN	NaN	-64.834	NaN	NaN	-64.84	NaN	NaN	-63.765
-0.16064	NaN	NaN	-64.325	NaN	NaN	-64.419	NaN	NaN	-64.839	NaN	NaN	-64.736	NaN	NaN	-63.748
-0.16015	NaN	NaN	-64.316	NaN	NaN	-64.4	NaN	NaN	-64.863	NaN	NaN	-64.686	NaN	NaN	-63.838
-0.15965	NaN	NaN	-64.341	NaN	NaN	-64.407	NaN	NaN	-64.849	NaN	NaN	-64.646	NaN	NaN	-63.949
-0.15915	NaN	NaN	-64.384	NaN	NaN	-64.431	NaN	NaN	-64.849	NaN	NaN	-64.629	NaN	NaN	-64.038
-0.15865	NaN	NaN	-64.426	NaN	NaN	-64.421	NaN	NaN	-64.848	NaN	NaN	-64.643	NaN	NaN	-64.052
-0.15815	NaN	NaN	-64.464	NaN	NaN	-64.405	NaN	NaN	-64.784	NaN	NaN	-64.679	NaN	NaN	-64.091
-0.15765	NaN	NaN	-64.451	NaN	NaN	-64.346	NaN	NaN	-64.747	NaN	NaN	-64.751	NaN	NaN	-64.168
-0.15716	NaN	NaN	-64.439	NaN	NaN	-64.349	NaN	NaN	-64.682	NaN	NaN	-64.781	NaN	NaN	-64.218
-0.15666	NaN	NaN	-64.413	NaN	NaN	-64.34	NaN	NaN	-64.66	NaN	NaN	-64.77	NaN	NaN	-64.216
-0.15616	NaN	NaN	-64.426	NaN	NaN	-64.357	NaN	NaN	-64.648	NaN	NaN	-64.754	NaN	NaN	-64.189
-0.15566	NaN	NaN	-64.44	NaN	NaN	-64.381	NaN	NaN	-64.66	NaN	NaN	-64.775	NaN	NaN	-64.12
-0.15516	NaN	NaN	-64.464	NaN	NaN	-64.395	NaN	NaN	-64.682	NaN	NaN	-64.778	NaN	NaN	-64.045
-0.15467	NaN	NaN	-64.46	NaN	NaN	-64.406	NaN	NaN	-64.682	NaN	NaN	-64.817	NaN	NaN	-63.975
-0.15417	NaN	NaN	-64.483	NaN	NaN	-64.436	NaN	NaN	-64.645	NaN	NaN	-64.814	NaN	NaN	-63.96
-0.15367	NaN	NaN	-64.483	NaN	NaN	-64.465	NaN	NaN	-64.604	NaN	NaN	-64.817	NaN	NaN	-63.946
-0.15317	NaN	NaN	-64.464	NaN	NaN	-64.465	NaN	NaN	-64.523	NaN	NaN	-64.879	NaN	NaN	-63.946
-0.15267	NaN	NaN	-64.484	NaN	NaN	-64.469	NaN	NaN	-64.559	NaN	NaN	-64.892	NaN	NaN	-63.948
-0.15217	NaN	NaN	-64.465	NaN	NaN	-64.444	NaN	NaN	-64.555	NaN	NaN	-64.897	NaN	NaN	-63.975
-0.15168	NaN	NaN	-64.458	NaN	NaN	-64.415	NaN	NaN	-64.61	NaN	NaN	-64.905	NaN	NaN	-63.962
-0.15118	NaN	NaN	-64.458	NaN	NaN	-64.425	NaN	NaN	-64.633	NaN	NaN	-64.817	NaN	NaN	-64.012
-0.15068	NaN	NaN	-64.464	NaN	NaN	-64.396	NaN	NaN	-64.582	NaN	NaN	-64.756	NaN	NaN	-64.026
-0.15018	NaN	NaN	-64.463	NaN	NaN	-64.421	NaN	NaN	-64.572	NaN	NaN	-64.713	NaN	NaN	-64.074
-0.14968	NaN	NaN	-64.456	NaN	NaN	-64.458	NaN	NaN	-64.561	NaN	NaN	-64.68	NaN	NaN	-64.085
-0.14919	NaN	NaN	-64.457	NaN	NaN	-64.453	NaN	NaN	-64.494	NaN	NaN	-64.67	NaN	NaN	-64.12
-0.14869	NaN	NaN	-64.49	NaN	NaN	-64.479	NaN	NaN	-64.543	NaN	NaN	-64.663	NaN	NaN	-63.859
-0.14819	NaN	NaN	-64.497	NaN	NaN	-64.477	NaN	NaN	-64.588	NaN	NaN	-64.63	NaN	NaN	-63.714
-0.14769	NaN	NaN	-64.535	NaN	NaN	-64.477	NaN	NaN	-64.665	NaN	NaN	-64.584	NaN	NaN	-63.707
-0.14719	NaN	NaN	-64.543	NaN	NaN	-64.508	NaN	NaN	-64.668	NaN	NaN	-64.582	NaN	NaN	-63.691
-0.14669	NaN	NaN	-64.539	NaN	NaN	-64.539	NaN	NaN	-64.695	NaN	NaN	-64.607	NaN	NaN	-63.707
-0.1462	NaN	NaN	-64.513	NaN	NaN	-64.569	NaN	NaN	-64.721	NaN	NaN	-64.636	NaN	NaN	-63.76
-0.1457	NaN	NaN	-64.493	NaN	NaN	-64.576	NaN	NaN	-64.762	NaN	NaN	-64.662	NaN	NaN	-63.875
-0.1452	NaN	NaN	-64.457	NaN	NaN	-64.574	NaN	NaN	-64.79	NaN	NaN	-64.664	NaN	NaN	-63.955
-0.1447	NaN	NaN	-64.404	NaN	NaN	-64.58	NaN	NaN	-64.738	NaN	NaN	-64.666	NaN	NaN	-64.001
-0.1442	NaN	NaN	-64.326	NaN	NaN	-64.555	NaN	NaN	-64.512	NaN	NaN	-64.649	NaN	NaN	-64.001
-0.14371	NaN	NaN	-64.169	NaN	NaN	-64.584	NaN	NaN	-64.401	NaN	NaN	-64.65	NaN	NaN	-63.984
-0.14321	NaN	NaN	-64.121	NaN	NaN	-64.597	NaN	NaN	-64.436	NaN	NaN	-64.605	NaN	NaN	-63.972
-0.14271	NaN	NaN	-64.088	NaN	NaN	-64.687	NaN	NaN	-64.468	NaN	NaN	-64.498	NaN	NaN	-64.07
-0.14221	NaN	NaN	-64.065	NaN	NaN	-64.747	NaN	NaN	-64.547	NaN	NaN	-64.519	NaN	NaN	-64.107
-0.14171	NaN	NaN	-64.053	NaN	NaN	-64.769	NaN	NaN	-64.613	NaN	NaN	-64.549	NaN	NaN	-64.07
-0.14121	NaN	NaN	-64.014	NaN	NaN	-64.735	NaN	NaN	-64.642	NaN	NaN	-64.563	NaN	NaN	-64.065
-0.14072	NaN	NaN	-64.017	NaN	NaN	-64.722	NaN	NaN	-64.715	NaN	NaN	-64.569	NaN	NaN	-64.056
-0.14022	NaN	NaN	-64.085	NaN	NaN	-64.712	NaN	NaN	-64.759	NaN	NaN	-64.601	NaN	NaN	-64.064
-0.13972	NaN	NaN	-64.122	NaN	NaN	-64.712	NaN	NaN	-64.775	NaN	NaN	-64.61	NaN	NaN	-64.107
-0.13922	NaN	NaN	-64.159	NaN	NaN	-64.641	NaN	NaN	-64.787	NaN	NaN	-64.612	NaN	NaN	-64.126
-0.13872	NaN	NaN	-64.224	NaN	NaN	-64.688	NaN	NaN	-64.759	NaN	NaN	-64.595	NaN	NaN	-64.1
-0.13823	NaN	NaN	-64.276	NaN	NaN	-64.729	NaN	NaN	-64.743	NaN	NaN	-64.558	NaN	NaN	-64.122
-0.13773	NaN	NaN	-64.304	NaN	NaN	-64.737	NaN	NaN	-64.68	NaN	NaN	-64.608	NaN	NaN	-64.085
-0.13723	NaN	NaN	-64.32	NaN	NaN	-64.59	NaN	NaN	-64.672	NaN	NaN	-64.598	NaN	NaN	-64.032
-0.13673	NaN	NaN	-64.321	NaN	NaN	-64.558	NaN	NaN	-64.665	NaN	NaN	-64.588	NaN	NaN	-64.006
-0.13623	NaN	NaN	-64.319	NaN	NaN	-64.498	NaN	NaN	-64.657	NaN	NaN	-64.597	NaN	NaN	-64.006
-0.13573	NaN	NaN	-64.315	NaN	NaN	-64.374	NaN	NaN	-64.686	NaN	NaN	-64.598	NaN	NaN	-63.975
-0.13524	NaN	NaN	-64.354	NaN	NaN	-64.361	NaN	NaN	-64.752	NaN	NaN	-64.584	NaN	NaN	-63.917
-0.13474	NaN	NaN	-64.4	NaN	NaN	-64.378	NaN	NaN	-64.784	NaN	NaN	-64.587	NaN	NaN	-63.884
-0.13424	NaN	NaN	-64.466	NaN	NaN	-64.376	NaN	NaN	-64.796	NaN	NaN	-64.589	NaN	NaN	-63.89
-0.13374	NaN	NaN	-64.471	NaN	NaN	-64.365	NaN	NaN	-64.813	NaN	NaN	-64.594	NaN	NaN	-63.911
-0.13324	NaN	NaN	-64.487	NaN	NaN	-64.37	NaN	NaN	-64.778	NaN	NaN	-64.586	NaN	NaN	-63.891
-0.13275	NaN	NaN	-64.478	NaN	NaN	-64.446	NaN	NaN	-64.666	NaN	NaN	-64.592	NaN	NaN	-63.894
-0.13225	NaN	NaN	-64.481	NaN	NaN	-64.506	NaN	NaN	-64.602	NaN	NaN	-64.616	NaN	NaN	-63.897
-0.13175	NaN	NaN	-64.495	NaN	NaN	-64.542	NaN	NaN	-64.59	NaN	NaN	-64.528	NaN	NaN	-63.922
-0.13125	NaN	NaN	-64.493	NaN	NaN	-64.568	NaN	NaN	-64.633	NaN	NaN	-64.556	NaN	NaN	-63.844
-0.13075	NaN	NaN	-64.521	NaN	NaN	-64.568	NaN	NaN	-64.659	NaN	NaN	-64.585	NaN	NaN	-63.753
-0.13025	NaN	NaN	-64.551	NaN	NaN	-64.58	NaN	NaN	-64.671	NaN	NaN	-64.57	NaN	NaN	-63.679
-0.12976	NaN	NaN	-64.593	NaN	NaN	-64.563	NaN	NaN	-64.675	NaN	NaN	-64.534	NaN	NaN	-63.633
-0.12926	NaN	NaN	-64.548	NaN	NaN	-64.54	NaN	NaN	-64.637	NaN	NaN	-64.517	NaN	NaN	-63.591
-0.12876	NaN	NaN	-64.585	NaN	NaN	-64.519	NaN	NaN	-64.633	NaN	NaN	-64.504	NaN	NaN	-63.576
-0.12826	NaN	NaN	-64.626	NaN	NaN	-64.361	NaN	NaN	-64.624	NaN	NaN	-64.448	NaN	NaN	-63.566
-0.12776	NaN	NaN	-64.647	NaN	NaN	-64.321	NaN	NaN	-64.662	NaN	NaN	-64.44	NaN	NaN	-63.583
-0.12727	NaN	NaN	-64.622	NaN	NaN	-64.3	NaN	NaN	-64.677	NaN	NaN	-64.477	NaN	NaN	-63.591
-0.12677	NaN	NaN	-64.587	NaN	NaN	-64.332	NaN	NaN	-64.694	NaN	NaN	-64.508	NaN	NaN	-63.585
-0.12627	NaN	NaN	-64.585	NaN	NaN	-64.375	NaN	NaN	-64.624	NaN	NaN	-64.548	NaN	NaN	-63.55
-0.12577	NaN	NaN	-64.554	NaN	NaN	-64.384	NaN	NaN	-64.617	NaN	NaN	-64.553	NaN	NaN	-63.536
-0.12527	NaN	NaN	-64.557	NaN	NaN	-64.416	NaN	NaN	-64.643	NaN	NaN	-64.553	NaN	NaN	-63.493
-0.12477	NaN	NaN	-64.525	NaN	NaN	-64.375	NaN	NaN	-64.733	NaN	NaN	-64.548	NaN	NaN	-63.478
-0.12428	NaN	NaN	-64.45	NaN	NaN	-64.357	NaN	NaN	-64.776	NaN	NaN	-64.566	NaN	NaN	-63.516
-0.12378	NaN	NaN	-64.462	NaN	NaN	-64.339	NaN	NaN	-64.833	NaN	NaN	-64.569	NaN	NaN	-63.623
-0.12328	NaN	NaN	-64.48	NaN	NaN	-64.336	NaN	NaN	-64.862	NaN	NaN	-64.616	NaN	NaN	-63.707
-0.12278	NaN	NaN	-64.475	NaN	NaN	-64.344	NaN	NaN	-64.901	NaN	NaN	-64.62	NaN	NaN	-63.788
-0.12228	NaN	NaN	-64.519	NaN	NaN	-64.302	NaN	NaN	-64.923	NaN	NaN	-64.621	NaN	NaN	-63.717
-0.12179	NaN	NaN	-64.544	NaN	NaN	-64.3	NaN	NaN	-64.916	NaN	NaN	-64.6	NaN	NaN	-63.562
-0.12129	NaN	NaN	-64.505	NaN	NaN	-64.351	NaN	NaN	-64.898	NaN	NaN	-64.612	NaN	NaN	-63.533
-0.12079	NaN	NaN	-64.426	NaN	NaN	-64.368	NaN	NaN	-64.869	NaN	NaN	-64.609	NaN	NaN	-63.553
-0.12029	NaN	NaN	-64.477	NaN	NaN	-64.377	NaN	NaN	-64.834	NaN	NaN	-64.618	NaN	NaN	-63.586
-0.11979	NaN	NaN	-64.46	NaN	NaN	-64.375	NaN	NaN	-64.808	NaN	NaN	-64.588	NaN	NaN	-63.609
-0.11929	NaN	NaN	-64.398	NaN	NaN	-64.364	NaN	NaN	-64.804	NaN	NaN	-64.614	NaN	NaN	-63.769
-0.1188	NaN	NaN	-64.381	NaN	NaN	-64.242	NaN	NaN	-64.804	NaN	NaN	-64.626	NaN	NaN	-63.807
-0.1183	NaN	NaN	-64.413	NaN	NaN	-64.222	NaN	NaN	-64.808	NaN	NaN	-64.635	NaN	NaN	-63.798
-0.1178	NaN	NaN	-64.395	NaN	NaN	-64.214	NaN	NaN	-64.845	NaN	NaN	-64.667	NaN	NaN	-63.797
-0.1173	NaN	NaN	-64.411	NaN	NaN	-64.271	NaN	NaN	-64.889	NaN	NaN	-64.743	NaN	NaN	-63.804
-0.1168	NaN	NaN	-64.423	NaN	NaN	-64.325	NaN	NaN	-64.868	NaN	NaN	-64.744	NaN	NaN	-63.795
-0.11631	NaN	NaN	-64.487	NaN	NaN	-64.372	NaN	NaN	-64.878	NaN	NaN	-64.795	NaN	NaN	-63.789
-0.11581	NaN	NaN	-64.541	NaN	NaN	-64.427	NaN	NaN	-64.888	NaN	NaN	-64.832	NaN	NaN	-63.821
-0.11531	NaN	NaN	-64.59	NaN	NaN	-64.441	NaN	NaN	-64.929	NaN	NaN	-64.856	NaN	NaN	-63.884
-0.11481	NaN	NaN	-64.603	NaN	NaN	-64.461	NaN	NaN	-64.984	NaN	NaN	-64.833	NaN	NaN	-63.884
-0.11431	NaN	NaN	-64.595	NaN	NaN	-64.497	NaN	NaN	-64.996	NaN	NaN	-64.828	NaN	NaN	-63.852
-0.11381	NaN	NaN	-64.605	NaN	NaN	-64.448	NaN	NaN	-65.036	NaN	NaN	-64.822	NaN	NaN	-63.839
-0.11332	NaN	NaN	-64.598	NaN	NaN	-64.442	NaN	NaN	-64.991	NaN	NaN	-64.847	NaN	NaN	-63.832
-0.11282	NaN	NaN	-64.61	NaN	NaN	-64.423	NaN	NaN	-64.976	NaN	NaN	-64.851	NaN	NaN	-63.814
-0.11232	NaN	NaN	-64.633	NaN	NaN	-64.412	NaN	NaN	-65.046	NaN	NaN	-64.893	NaN	NaN	-63.83
-0.11182	NaN	NaN	-64.638	NaN	NaN	-64.371	NaN	NaN	-65.093	NaN	NaN	-64.889	NaN	NaN	-63.867
-0.11132	NaN	NaN	-64.644	NaN	NaN	-64.3	NaN	NaN	-65.061	NaN	NaN	-64.868	NaN	NaN	-63.891
-0.11083	NaN	NaN	-64.699	NaN	NaN	-64.24	NaN	NaN	-65.031	NaN	NaN	-64.804	NaN	NaN	-63.928
-0.11033	NaN	NaN	-64.714	NaN	NaN	-64.284	NaN	NaN	-64.971	NaN	NaN	-64.769	NaN	NaN	-63.93
-0.10983	NaN	NaN	-64.703	NaN	NaN	-64.328	NaN	NaN	-64.956	NaN	NaN	-64.749	NaN	NaN	-63.946
-0.10933	NaN	NaN	-64.77	NaN	NaN	-64.391	NaN	NaN	-64.958	NaN	NaN	-64.739	NaN	NaN	-63.908
-0.10883	NaN	NaN	-64.793	NaN	NaN	-64.395	NaN	NaN	-64.942	NaN	NaN	-64.763	NaN	NaN	-63.833
-0.10833	NaN	NaN	-64.812	NaN	NaN	-64.427	NaN	NaN	-64.968	NaN	NaN	-64.766	NaN	NaN	-63.797
-0.10784	NaN	NaN	-64.822	NaN	NaN	-64.39	NaN	NaN	-65.02	NaN	NaN	-64.745	NaN	NaN	-63.868
-0.10734	NaN	NaN	-64.848	NaN	NaN	-64.362	NaN	NaN	-65.04	NaN	NaN	-64.659	NaN	NaN	-63.865
-0.10684	NaN	NaN	-64.872	NaN	NaN	-64.344	NaN	NaN	-65.057	NaN	NaN	-64.614	NaN	NaN	-63.908
-0.10634	NaN	NaN	-64.858	NaN	NaN	-64.328	NaN	NaN	-65.069	NaN	NaN	-64.592	NaN	NaN	-63.966
-0.10584	NaN	NaN	-64.846	NaN	NaN	-64.369	NaN	NaN	-65.057	NaN	NaN	-64.575	NaN	NaN	-64.045
-0.10535	NaN	NaN	-64.851	NaN	NaN	-64.415	NaN	NaN	-65.055	NaN	NaN	-64.567	NaN	NaN	-64.041
-0.10485	NaN	NaN	-64.846	NaN	NaN	-64.47	NaN	NaN	-65.055	NaN	NaN	-64.568	NaN	NaN	-63.974
-0.10435	NaN	NaN	-64.87	NaN	NaN	-64.53	NaN	NaN	-65.074	NaN	NaN	-64.57	NaN	NaN	-63.92
-0.10385	NaN	NaN	-64.885	NaN	NaN	-64.621	NaN	NaN	-65.025	NaN	NaN	-64.582	NaN	NaN	-63.711
-0.10335	NaN	NaN	-64.906	NaN	NaN	-64.616	NaN	NaN	-65.007	NaN	NaN	-64.592	NaN	NaN	-63.624
-0.10285	NaN	NaN	-64.904	NaN	NaN	-64.595	NaN	NaN	-64.967	NaN	NaN	-64.612	NaN	NaN	-63.569
-0.10236	NaN	NaN	-64.907	NaN	NaN	-64.466	NaN	NaN	-64.961	NaN	NaN	-64.606	NaN	NaN	-63.632
-0.10186	NaN	NaN	-64.896	NaN	NaN	-64.458	NaN	NaN	-64.932	NaN	NaN	-64.612	NaN	NaN	-63.719
-0.10136	NaN	NaN	-64.899	NaN	NaN	-64.448	NaN	NaN	-64.978	NaN	NaN	-64.607	NaN	NaN	-63.746
-0.10086	NaN	NaN	-64.892	NaN	NaN	-64.455	NaN	NaN	-65.013	NaN	NaN	-64.612	NaN	NaN	-63.814
-0.10036	NaN	NaN	-64.893	NaN	NaN	-64.439	NaN	NaN	-65.036	NaN	NaN	-64.644	NaN	NaN	-63.846
-0.099865	NaN	NaN	-64.876	NaN	NaN	-64.445	NaN	NaN	-65.048	NaN	NaN	-64.682	NaN	NaN	-63.925
-0.099367	NaN	NaN	-64.869	NaN	NaN	-64.463	NaN	NaN	-65.046	NaN	NaN	-64.721	NaN	NaN	-63.951
-0.098869	NaN	NaN	-64.854	NaN	NaN	-64.476	NaN	NaN	-65.046	NaN	NaN	-64.707	NaN	NaN	-63.951
-0.098371	NaN	NaN	-64.857	NaN	NaN	-64.526	NaN	NaN	-65.002	NaN	NaN	-64.704	NaN	NaN	-63.879
-0.097873	NaN	NaN	-64.83	NaN	NaN	-64.556	NaN	NaN	-65.046	NaN	NaN	-64.67	NaN	NaN	-63.847
-0.097375	NaN	NaN	-64.81	NaN	NaN	-64.572	NaN	NaN	-65.039	NaN	NaN	-64.659	NaN	NaN	-63.778
-0.096876	NaN	NaN	-64.78	NaN	NaN	-64.584	NaN	NaN	-64.949	NaN	NaN	-64.664	NaN	NaN	-63.695
-0.096378	NaN	NaN	-64.764	NaN	NaN	-64.584	NaN	NaN	-64.826	NaN	NaN	-64.712	NaN	NaN	-63.603
-0.09588	NaN	NaN	-64.757	NaN	NaN	-64.548	NaN	NaN	-64.764	NaN	NaN	-64.743	NaN	NaN	-63.64
-0.095382	NaN	NaN	-64.777	NaN	NaN	-64.534	NaN	NaN	-64.752	NaN	NaN	-64.761	NaN	NaN	-63.626
-0.094884	NaN	NaN	-64.79	NaN	NaN	-64.491	NaN	NaN	-64.828	NaN	NaN	-64.794	NaN	NaN	-63.626
-0.094385	NaN	NaN	-64.782	NaN	NaN	-64.456	NaN	NaN	-64.901	NaN	NaN	-64.791	NaN	NaN	-63.649
-0.093887	NaN	NaN	-64.791	NaN	NaN	-64.379	NaN	NaN	-64.949	NaN	NaN	-64.775	NaN	NaN	-63.618
-0.093389	NaN	NaN	-64.796	NaN	NaN	-64.316	NaN	NaN	-64.952	NaN	NaN	-64.819	NaN	NaN	-63.582
-0.092891	NaN	NaN	-64.796	NaN	NaN	-64.282	NaN	NaN	-64.907	NaN	NaN	-64.804	NaN	NaN	-63.643
-0.092393	NaN	NaN	-64.796	NaN	NaN	-64.26	NaN	NaN	-64.788	NaN	NaN	-64.762	NaN	NaN	-63.684
-0.091895	NaN	NaN	-64.776	NaN	NaN	-64.26	NaN	NaN	-64.698	NaN	NaN	-64.691	NaN	NaN	-63.687
-0.091396	NaN	NaN	-64.813	NaN	NaN	-64.246	NaN	NaN	-64.72	NaN	NaN	-64.646	NaN	NaN	-63.679
-0.090898	NaN	NaN	-64.814	NaN	NaN	-64.258	NaN	NaN	-64.739	NaN	NaN	-64.63	NaN	NaN	-63.722
-0.0904	NaN	NaN	-64.812	NaN	NaN	-64.294	NaN	NaN	-64.706	NaN	NaN	-64.63	NaN	NaN	-63.788
-0.089902	NaN	NaN	-64.793	NaN	NaN	-64.362	NaN	NaN	-64.662	NaN	NaN	-64.613	NaN	NaN	-63.839
-0.089404	NaN	NaN	-64.78	NaN	NaN	-64.385	NaN	NaN	-64.654	NaN	NaN	-64.626	NaN	NaN	-63.807
-0.088905	NaN	NaN	-64.733	NaN	NaN	-64.434	NaN	NaN	-64.724	NaN	NaN	-64.579	NaN	NaN	-63.804
-0.088407	NaN	NaN	-64.704	NaN	NaN	-64.497	NaN	NaN	-64.764	NaN	NaN	-64.588	NaN	NaN	-63.83
-0.087909	NaN	NaN	-64.681	NaN	NaN	-64.506	NaN	NaN	-64.808	NaN	NaN	-64.617	NaN	NaN	-63.785
-0.087411	NaN	NaN	-64.658	NaN	NaN	-64.503	NaN	NaN	-64.888	NaN	NaN	-64.642	NaN	NaN	-63.846
-0.086913	NaN	NaN	-64.646	NaN	NaN	-64.519	NaN	NaN	-64.942	NaN	NaN	-64.628	NaN	NaN	-63.891
-0.086415	NaN	NaN	-64.644	NaN	NaN	-64.503	NaN	NaN	-64.93	NaN	NaN	-64.62	NaN	NaN	-63.894
-0.085916	NaN	NaN	-64.676	NaN	NaN	-64.47	NaN	NaN	-64.868	NaN	NaN	-64.618	NaN	NaN	-63.882
-0.085418	NaN	NaN	-64.706	NaN	NaN	-64.445	NaN	NaN	-64.726	NaN	NaN	-64.608	NaN	NaN	-63.839
-0.08492	NaN	NaN	-64.716	NaN	NaN	-64.416	NaN	NaN	-64.726	NaN	NaN	-64.582	NaN	NaN	-63.797
-0.084422	NaN	NaN	-64.738	NaN	NaN	-64.413	NaN	NaN	-64.718	NaN	NaN	-64.521	NaN	NaN	-63.696
-0.083924	NaN	NaN	-64.747	NaN	NaN	-64.415	NaN	NaN	-64.825	NaN	NaN	-64.516	NaN	NaN	-63.644
-0.083425	NaN	NaN	-64.763	NaN	NaN	-64.452	NaN	NaN	-64.881	NaN	NaN	-64.51	NaN	NaN	-63.547
-0.082927	NaN	NaN	-64.739	NaN	NaN	-64.474	NaN	NaN	-64.848	NaN	NaN	-64.526	NaN	NaN	-63.547
-0.082429	NaN	NaN	-64.748	NaN	NaN	-64.515	NaN	NaN	-64.848	NaN	NaN	-64.504	NaN	NaN	-63.612
-0.081931	NaN	NaN	-64.719	NaN	NaN	-64.51	NaN	NaN	-64.862	NaN	NaN	-64.506	NaN	NaN	-63.713
-0.081433	NaN	NaN	-64.705	NaN	NaN	-64.534	NaN	NaN	-64.866	NaN	NaN	-64.524	NaN	NaN	-63.681
-0.080935	NaN	NaN	-64.715	NaN	NaN	-64.553	NaN	NaN	-64.855	NaN	NaN	-64.527	NaN	NaN	-63.672
-0.080436	NaN	NaN	-64.709	NaN	NaN	-64.576	NaN	NaN	-64.836	NaN	NaN	-64.537	NaN	NaN	-63.696
-0.079938	NaN	NaN	-64.658	NaN	NaN	-64.631	NaN	NaN	-64.747	NaN	NaN	-64.554	NaN	NaN	-63.73
-0.07944	NaN	NaN	-64.652	NaN	NaN	-64.659	NaN	NaN	-64.77	NaN	NaN	-64.55	NaN	NaN	-63.748
-0.078942	NaN	NaN	-64.645	NaN	NaN	-64.659	NaN	NaN	-64.834	NaN	NaN	-64.553	NaN	NaN	-63.83
-0.078444	NaN	NaN	-64.698	NaN	NaN	-64.645	NaN	NaN	-64.868	NaN	NaN	-64.571	NaN	NaN	-63.807
-0.077945	NaN	NaN	-64.678	NaN	NaN	-64.559	NaN	NaN	-64.868	NaN	NaN	-64.559	NaN	NaN	-63.801
-0.077447	NaN	NaN	-64.661	NaN	NaN	-64.567	NaN	NaN	-64.862	NaN	NaN	-64.614	NaN	NaN	-63.807
-0.076949	NaN	NaN	-64.669	NaN	NaN	-64.592	NaN	NaN	-64.851	NaN	NaN	-64.663	NaN	NaN	-63.821
-0.076451	NaN	NaN	-64.68	NaN	NaN	-64.643	NaN	NaN	-64.81	NaN	NaN	-64.696	NaN	NaN	-63.833
-0.075953	NaN	NaN	-64.724	NaN	NaN	-64.683	NaN	NaN	-64.785	NaN	NaN	-64.679	NaN	NaN	-63.841
-0.075455	NaN	NaN	-64.738	NaN	NaN	-64.732	NaN	NaN	-64.787	NaN	NaN	-64.685	NaN	NaN	-63.868
-0.074956	NaN	NaN	-64.709	NaN	NaN	-64.733	NaN	NaN	-64.805	NaN	NaN	-64.703	NaN	NaN	-63.858
-0.074458	NaN	NaN	-64.749	NaN	NaN	-64.709	NaN	NaN	-64.826	NaN	NaN	-64.712	NaN	NaN	-63.87
-0.07396	NaN	NaN	-64.775	NaN	NaN	-64.713	NaN	NaN	-64.846	NaN	NaN	-64.722	NaN	NaN	-63.841
-0.073462	NaN	NaN	-64.751	NaN	NaN	-64.656	NaN	NaN	-64.822	NaN	NaN	-64.751	NaN	NaN	-63.83
-0.072964	NaN	NaN	-64.78	NaN	NaN	-64.694	NaN	NaN	-64.817	NaN	NaN	-64.806	NaN	NaN	-63.827
-0.072466	NaN	NaN	-64.805	NaN	NaN	-64.686	NaN	NaN	-64.808	NaN	NaN	-64.846	NaN	NaN	-63.809
-0.071967	NaN	NaN	-64.791	NaN	NaN	-64.657	NaN	NaN	-64.823	NaN	NaN	-64.883	NaN	NaN	-63.801
-0.071469	NaN	NaN	-64.802	NaN	NaN	-64.658	NaN	NaN	-64.845	NaN	NaN	-64.922	NaN	NaN	-63.775
-0.070971	NaN	NaN	-64.814	NaN	NaN	-64.568	NaN	NaN	-64.871	NaN	NaN	-64.923	NaN	NaN	-63.817
-0.070473	NaN	NaN	-64.789	NaN	NaN	-64.519	NaN	NaN	-64.93	NaN	NaN	-64.908	NaN	NaN	-63.766
-0.069975	NaN	NaN	-64.811	NaN	NaN	-64.55	NaN	NaN	-64.945	NaN	NaN	-64.908	NaN	NaN	-63.788
-0.069476	NaN	NaN	-64.822	NaN	NaN	-64.542	NaN	NaN	-64.93	NaN	NaN	-64.894	NaN	NaN	-63.733
-0.068978	NaN	NaN	-64.809	NaN	NaN	-64.537	NaN	NaN	-64.93	NaN	NaN	-64.879	NaN	NaN	-63.748
-0.06848	NaN	NaN	-64.823	NaN	NaN	-64.551	NaN	NaN	-64.927	NaN	NaN	-64.887	NaN	NaN	-63.801
-0.067982	NaN	NaN	-64.846	NaN	NaN	-64.578	NaN	NaN	-64.932	NaN	NaN	-64.89	NaN	NaN	-63.844
-0.067484	NaN	NaN	-64.825	NaN	NaN	-64.59	NaN	NaN	-64.967	NaN	NaN	-64.874	NaN	NaN	-63.843
-0.066986	NaN	NaN	-64.798	NaN	NaN	-64.619	NaN	NaN	-65.003	NaN	NaN	-64.853	NaN	NaN	-63.749
-0.066487	NaN	NaN	-64.83	NaN	NaN	-64.648	NaN	NaN	-65.002	NaN	NaN	-64.846	NaN	NaN	-63.766
-0.065989	NaN	NaN	-64.833	NaN	NaN	-64.649	NaN	NaN	-65.005	NaN	NaN	-64.838	NaN	NaN	-63.684
-0.065491	NaN	NaN	-64.849	NaN	NaN	-64.671	NaN	NaN	-65.025	NaN	NaN	-64.833	NaN	NaN	-63.649
-0.064993	NaN	NaN	-64.851	NaN	NaN	-64.652	NaN	NaN	-65.092	NaN	NaN	-64.823	NaN	NaN	-63.603
-0.064495	NaN	NaN	-64.872	NaN	NaN	-64.566	NaN	NaN	-65.126	NaN	NaN	-64.811	NaN	NaN	-63.603
-0.063996	NaN	NaN	-64.887	NaN	NaN	-64.588	NaN	NaN	-65.182	NaN	NaN	-64.81	NaN	NaN	-63.591
-0.063498	NaN	NaN	-64.905	NaN	NaN	-64.604	NaN	NaN	-65.173	NaN	NaN	-64.83	NaN	NaN	-63.6
-0.063	NaN	NaN	-64.84	NaN	NaN	-64.629	NaN	NaN	-65.174	NaN	NaN	-64.865	NaN	NaN	-63.623
-0.062502	NaN	NaN	-64.768	NaN	NaN	-64.677	NaN	NaN	-65.084	NaN	NaN	-64.897	NaN	NaN	-63.655
-0.062004	NaN	NaN	-64.745	NaN	NaN	-64.709	NaN	NaN	-65.028	NaN	NaN	-64.895	NaN	NaN	-63.672
-0.061506	NaN	NaN	-64.788	NaN	NaN	-64.767	NaN	NaN	-64.965	NaN	NaN	-64.86	NaN	NaN	-63.74
-0.061007	NaN	NaN	-64.795	NaN	NaN	-64.797	NaN	NaN	-64.956	NaN	NaN	-64.837	NaN	NaN	-63.734
-0.060509	NaN	NaN	-64.826	NaN	NaN	-64.761	NaN	NaN	-64.956	NaN	NaN	-64.806	NaN	NaN	-63.749
-0.060011	NaN	NaN	-64.857	NaN	NaN	-64.679	NaN	NaN	-65.008	NaN	NaN	-64.76	NaN	NaN	-63.768
-0.059513	NaN	NaN	-64.861	NaN	NaN	-64.696	NaN	NaN	-65.037	NaN	NaN	-64.747	NaN	NaN	-63.717
-0.059015	NaN	NaN	-64.85	NaN	NaN	-64.713	NaN	NaN	-64.988	NaN	NaN	-64.752	NaN	NaN	-63.681
-0.058516	NaN	NaN	-64.838	NaN	NaN	-64.704	NaN	NaN	-64.981	NaN	NaN	-64.753	NaN	NaN	-63.681
-0.058018	NaN	NaN	-64.823	NaN	NaN	-64.746	NaN	NaN	-65.005	NaN	NaN	-64.744	NaN	NaN	-63.659
-0.05752	NaN	NaN	-64.831	NaN	NaN	-64.699	NaN	NaN	-65.013	NaN	NaN	-64.777	NaN	NaN	-63.707
-0.057022	NaN	NaN	-64.733	NaN	NaN	-64.621	NaN	NaN	-65.017	NaN	NaN	-64.762	NaN	NaN	-63.72
-0.056524	NaN	NaN	-64.683	NaN	NaN	-64.467	NaN	NaN	-65.013	NaN	NaN	-64.732	NaN	NaN	-63.751
-0.056026	NaN	NaN	-64.645	NaN	NaN	-64.521	NaN	NaN	-65.008	NaN	NaN	-64.681	NaN	NaN	-63.772
-0.055527	NaN	NaN	-64.637	NaN	NaN	-64.563	NaN	NaN	-65.049	NaN	NaN	-64.664	NaN	NaN	-63.757
-0.055029	NaN	NaN	-64.602	NaN	NaN	-64.565	NaN	NaN	-65.043	NaN	NaN	-64.687	NaN	NaN	-63.78
-0.054531	NaN	NaN	-64.6	NaN	NaN	-64.576	NaN	NaN	-65.058	NaN	NaN	-64.702	NaN	NaN	-63.836
-0.054033	NaN	NaN	-64.608	NaN	NaN	-64.617	NaN	NaN	-65.055	NaN	NaN	-64.683	NaN	NaN	-63.897
-0.053535	NaN	NaN	-64.641	NaN	NaN	-64.674	NaN	NaN	-65.051	NaN	NaN	-64.681	NaN	NaN	-63.885
-0.053036	NaN	NaN	-64.653	NaN	NaN	-64.683	NaN	NaN	-65.02	NaN	NaN	-64.67	NaN	NaN	-63.989
-0.052538	NaN	NaN	-64.674	NaN	NaN	-64.686	NaN	NaN	-64.968	NaN	NaN	-64.674	NaN	NaN	-63.998
-0.05204	NaN	NaN	-64.629	NaN	NaN	-64.668	NaN	NaN	-64.982	NaN	NaN	-64.656	NaN	NaN	-64.045
-0.051542	NaN	NaN	-64.601	NaN	NaN	-64.645	NaN	NaN	-64.906	NaN	NaN	-64.656	NaN	NaN	-64.033
-0.051044	NaN	NaN	-64.63	NaN	NaN	-64.577	NaN	NaN	-64.877	NaN	NaN	-64.659	NaN	NaN	-63.926
-0.050546	NaN	NaN	-64.701	NaN	NaN	-64.592	NaN	NaN	-64.796	NaN	NaN	-64.656	NaN	NaN	-63.916
-0.050047	NaN	NaN	-64.68	NaN	NaN	-64.651	NaN	NaN	-64.871	NaN	NaN	-64.627	NaN	NaN	-63.876
-0.049549	NaN	NaN	-64.672	NaN	NaN	-64.697	NaN	NaN	-64.889	NaN	NaN	-64.622	NaN	NaN	-63.928
-0.049051	NaN	NaN	-64.661	NaN	NaN	-64.741	NaN	NaN	-64.901	NaN	NaN	-64.616	NaN	NaN	-63.995
-0.048553	NaN	NaN	-64.65	NaN	NaN	-64.728	NaN	NaN	-64.814	NaN	NaN	-64.601	NaN	NaN	-64.02
-0.048055	NaN	NaN	-64.632	NaN	NaN	-64.734	NaN	NaN	-64.799	NaN	NaN	-64.624	NaN	NaN	-64.05
-0.047556	NaN	NaN	-64.654	NaN	NaN	-64.789	NaN	NaN	-64.799	NaN	NaN	-64.623	NaN	NaN	-64.026
-0.047058	NaN	NaN	-64.569	NaN	NaN	-64.838	NaN	NaN	-64.839	NaN	NaN	-64.632	NaN	NaN	-64.026
-0.04656	NaN	NaN	-64.585	NaN	NaN	-64.759	NaN	NaN	-64.865	NaN	NaN	-64.655	NaN	NaN	-64.125
-0.046062	NaN	NaN	-64.616	NaN	NaN	-64.747	NaN	NaN	-64.906	NaN	NaN	-64.651	NaN	NaN	-64.155
-0.045564	NaN	NaN	-64.648	NaN	NaN	-64.757	NaN	NaN	-64.886	NaN	NaN	-64.65	NaN	NaN	-64.154
-0.045066	NaN	NaN	-64.692	NaN	NaN	-64.732	NaN	NaN	-64.86	NaN	NaN	-64.641	NaN	NaN	-64.155
-0.044567	NaN	NaN	-64.739	NaN	NaN	-64.722	NaN	NaN	-64.947	NaN	NaN	-64.64	NaN	NaN	-64.171
-0.044069	NaN	NaN	-64.755	NaN	NaN	-64.722	NaN	NaN	-65.023	NaN	NaN	-64.624	NaN	NaN	-64.165
-0.043571	NaN	NaN	-64.73	NaN	NaN	-64.719	NaN	NaN	-65.093	NaN	NaN	-64.64	NaN	NaN	-64.158
-0.043073	NaN	NaN	-64.731	NaN	NaN	-64.722	NaN	NaN	-65.081	NaN	NaN	-64.648	NaN	NaN	-64.169
-0.042575	NaN	NaN	-64.707	NaN	NaN	-64.712	NaN	NaN	-65.011	NaN	NaN	-64.666	NaN	NaN	-64.161
-0.042076	NaN	NaN	-64.73	NaN	NaN	-64.706	NaN	NaN	-64.889	NaN	NaN	-64.669	NaN	NaN	-64.117
-0.041578	NaN	NaN	-64.722	NaN	NaN	-64.696	NaN	NaN	-64.886	NaN	NaN	-64.685	NaN	NaN	-64.078
-0.04108	NaN	NaN	-64.716	NaN	NaN	-64.649	NaN	NaN	-64.903	NaN	NaN	-64.708	NaN	NaN	-64.056
-0.040582	NaN	NaN	-64.713	NaN	NaN	-64.635	NaN	NaN	-64.926	NaN	NaN	-64.751	NaN	NaN	-64.076
-0.040084	NaN	NaN	-64.687	NaN	NaN	-64.629	NaN	NaN	-64.945	NaN	NaN	-64.762	NaN	NaN	-64.079
-0.039586	NaN	NaN	-64.698	NaN	NaN	-64.574	NaN	NaN	-64.976	NaN	NaN	-64.775	NaN	NaN	-64.166
-0.039087	NaN	NaN	-64.723	NaN	NaN	-64.553	NaN	NaN	-65.039	NaN	NaN	-64.772	NaN	NaN	-64.213
-0.038589	NaN	NaN	-64.761	NaN	NaN	-64.56	NaN	NaN	-65.02	NaN	NaN	-64.809	NaN	NaN	-64.136
-0.038091	NaN	NaN	-64.819	NaN	NaN	-64.559	NaN	NaN	-65.016	NaN	NaN	-64.82	NaN	NaN	-64.116
-0.037593	NaN	NaN	-64.822	NaN	NaN	-64.561	NaN	NaN	-65.014	NaN	NaN	-64.831	NaN	NaN	-64.11
-0.037095	NaN	NaN	-64.768	NaN	NaN	-64.604	NaN	NaN	-64.996	NaN	NaN	-64.778	NaN	NaN	-64.145
-0.036596	NaN	NaN	-64.739	NaN	NaN	-64.666	NaN	NaN	-65.013	NaN	NaN	-64.727	NaN	NaN	-64.222
-0.036098	NaN	NaN	-64.708	NaN	NaN	-64.651	NaN	NaN	-64.979	NaN	NaN	-64.693	NaN	NaN	-64.238
-0.0356	NaN	NaN	-64.695	NaN	NaN	-64.609	NaN	NaN	-65.02	NaN	NaN	-64.639	NaN	NaN	-64.149
-0.035102	NaN	NaN	-64.668	NaN	NaN	-64.564	NaN	NaN	-65.014	NaN	NaN	-64.569	NaN	NaN	-64.126
-0.034604	NaN	NaN	-64.658	NaN	NaN	-64.486	NaN	NaN	-65.01	NaN	NaN	-64.524	NaN	NaN	-64.184
-0.034106	NaN	NaN	-64.636	NaN	NaN	-64.486	NaN	NaN	-65.002	NaN	NaN	-64.509	NaN	NaN	-64.21
-0.033607	NaN	NaN	-64.64	NaN	NaN	-64.515	NaN	NaN	-65.01	NaN	NaN	-64.511	NaN	NaN	-64.178
-0.033109	NaN	NaN	-64.658	NaN	NaN	-64.591	NaN	NaN	-65.086	NaN	NaN	-64.528	NaN	NaN	-64.134
-0.032611	NaN	NaN	-64.669	NaN	NaN	-64.621	NaN	NaN	-65.083	NaN	NaN	-64.566	NaN	NaN	-64.154
-0.032113	NaN	NaN	-64.679	NaN	NaN	-64.635	NaN	NaN	-65.086	NaN	NaN	-64.601	NaN	NaN	-64.152
-0.031615	NaN	NaN	-64.654	NaN	NaN	-64.607	NaN	NaN	-65.093	NaN	NaN	-64.628	NaN	NaN	-64.116
-0.031116	NaN	NaN	-64.629	NaN	NaN	-64.608	NaN	NaN	-65.084	NaN	NaN	-64.654	NaN	NaN	-64.163
-0.030618	NaN	NaN	-64.619	NaN	NaN	-64.628	NaN	NaN	-65.103	NaN	NaN	-64.66	NaN	NaN	-64.197
-0.03012	NaN	NaN	-64.634	NaN	NaN	-64.437	NaN	NaN	-65.107	NaN	NaN	-64.616	NaN	NaN	-64.197
-0.029622	NaN	NaN	-64.683	NaN	NaN	-64.387	NaN	NaN	-65.109	NaN	NaN	-64.605	NaN	NaN	-64.186
-0.029124	NaN	NaN	-64.7	NaN	NaN	-64.395	NaN	NaN	-65.136	NaN	NaN	-64.608	NaN	NaN	-64.158
-0.028626	NaN	NaN	-64.692	NaN	NaN	-64.391	NaN	NaN	-65.171	NaN	NaN	-64.579	NaN	NaN	-64.142
-0.028127	NaN	NaN	-64.698	NaN	NaN	-64.413	NaN	NaN	-65.159	NaN	NaN	-64.617	NaN	NaN	-64.102
-0.027629	NaN	NaN	-64.726	NaN	NaN	-64.501	NaN	NaN	-65.133	NaN	NaN	-64.634	NaN	NaN	-64.146
-0.027131	NaN	NaN	-64.731	NaN	NaN	-64.548	NaN	NaN	-65.048	NaN	NaN	-64.656	NaN	NaN	-64.126
-0.026633	NaN	NaN	-64.748	NaN	NaN	-64.593	NaN	NaN	-64.884	NaN	NaN	-64.672	NaN	NaN	-64.116
-0.026135	NaN	NaN	-64.77	NaN	NaN	-64.596	NaN	NaN	-64.837	NaN	NaN	-64.651	NaN	NaN	-64.099
-0.025636	NaN	NaN	-64.779	NaN	NaN	-64.555	NaN	NaN	-64.86	NaN	NaN	-64.676	NaN	NaN	-64.047
-0.025138	NaN	NaN	-64.772	NaN	NaN	-64.576	NaN	NaN	-64.726	NaN	NaN	-64.679	NaN	NaN	-64.059
-0.02464	NaN	NaN	-64.809	NaN	NaN	-64.609	NaN	NaN	-64.695	NaN	NaN	-64.679	NaN	NaN	-64.026
-0.024142	NaN	NaN	-64.818	NaN	NaN	-64.642	NaN	NaN	-64.677	NaN	NaN	-64.678	NaN	NaN	-63.91
-0.023644	NaN	NaN	-64.811	NaN	NaN	-64.651	NaN	NaN	-64.677	NaN	NaN	-64.655	NaN	NaN	-63.907
-0.023146	NaN	NaN	-64.767	NaN	NaN	-64.66	NaN	NaN	-64.688	NaN	NaN	-64.578	NaN	NaN	-63.913
-0.022647	NaN	NaN	-64.812	NaN	NaN	-64.61	NaN	NaN	-64.721	NaN	NaN	-64.554	NaN	NaN	-63.891
-0.022149	NaN	NaN	-64.871	NaN	NaN	-64.624	NaN	NaN	-64.776	NaN	NaN	-64.524	NaN	NaN	-63.908
-0.021651	NaN	NaN	-64.855	NaN	NaN	-64.648	NaN	NaN	-64.799	NaN	NaN	-64.572	NaN	NaN	-63.89
-0.021153	NaN	NaN	-64.846	NaN	NaN	-64.669	NaN	NaN	-64.802	NaN	NaN	-64.651	NaN	NaN	-63.939
-0.020655	NaN	NaN	-64.852	NaN	NaN	-64.654	NaN	NaN	-64.785	NaN	NaN	-64.703	NaN	NaN	-64.027
-0.020156	NaN	NaN	-64.807	NaN	NaN	-64.683	NaN	NaN	-64.819	NaN	NaN	-64.706	NaN	NaN	-64.03
-0.019658	NaN	NaN	-64.742	NaN	NaN	-64.682	NaN	NaN	-64.813	NaN	NaN	-64.715	NaN	NaN	-63.984
-0.01916	NaN	NaN	-64.733	NaN	NaN	-64.674	NaN	NaN	-64.855	NaN	NaN	-64.757	NaN	NaN	-63.983
-0.018662	NaN	NaN	-64.747	NaN	NaN	-64.672	NaN	NaN	-64.877	NaN	NaN	-64.773	NaN	NaN	-63.981
-0.018164	NaN	NaN	-64.763	NaN	NaN	-64.646	NaN	NaN	-64.82	NaN	NaN	-64.778	NaN	NaN	-63.969
-0.017666	NaN	NaN	-64.748	NaN	NaN	-64.579	NaN	NaN	-64.833	NaN	NaN	-64.806	NaN	NaN	-63.981
-0.017167	NaN	NaN	-64.784	NaN	NaN	-64.556	NaN	NaN	-64.874	NaN	NaN	-64.778	NaN	NaN	-63.983
-0.016669	NaN	NaN	-64.803	NaN	NaN	-64.539	NaN	NaN	-64.926	NaN	NaN	-64.773	NaN	NaN	-63.968
-0.016171	NaN	NaN	-64.807	NaN	NaN	-64.526	NaN	NaN	-64.918	NaN	NaN	-64.68	NaN	NaN	-63.959
-0.015673	NaN	NaN	-64.76	NaN	NaN	-64.532	NaN	NaN	-64.981	NaN	NaN	-64.604	NaN	NaN	-63.977
-0.015175	NaN	NaN	-64.723	NaN	NaN	-64.519	NaN	NaN	-64.95	NaN	NaN	-64.556	NaN	NaN	-64.053
-0.014676	NaN	NaN	-64.72	NaN	NaN	-64.506	NaN	NaN	-64.968	NaN	NaN	-64.496	NaN	NaN	-64.065
-0.014178	NaN	NaN	-64.701	NaN	NaN	-64.51	NaN	NaN	-64.964	NaN	NaN	-64.445	NaN	NaN	-64.079
-0.01368	NaN	NaN	-64.684	NaN	NaN	-64.49	NaN	NaN	-64.994	NaN	NaN	-64.424	NaN	NaN	-64.079
-0.013182	NaN	NaN	-64.712	NaN	NaN	-64.51	NaN	NaN	-65.005	NaN	NaN	-64.414	NaN	NaN	-63.933
-0.012684	NaN	NaN	-64.703	NaN	NaN	-64.542	NaN	NaN	-65.007	NaN	NaN	-64.39	NaN	NaN	-63.945
-0.012186	NaN	NaN	-64.697	NaN	NaN	-64.597	NaN	NaN	-64.976	NaN	NaN	-64.379	NaN	NaN	-64.023
-0.011687	NaN	NaN	-64.606	NaN	NaN	-64.66	NaN	NaN	-64.967	NaN	NaN	-64.391	NaN	NaN	-64.081
-0.011189	NaN	NaN	-64.545	NaN	NaN	-64.681	NaN	NaN	-64.909	NaN	NaN	-64.438	NaN	NaN	-64.053
-0.010691	NaN	NaN	-64.492	NaN	NaN	-64.707	NaN	NaN	-64.88	NaN	NaN	-64.43	NaN	NaN	-64.062
-0.010193	NaN	NaN	-64.485	NaN	NaN	-64.711	NaN	NaN	-64.884	NaN	NaN	-64.446	NaN	NaN	-64.016
-0.0096946	NaN	NaN	-64.511	NaN	NaN	-64.701	NaN	NaN	-64.849	NaN	NaN	-64.431	NaN	NaN	-63.955
-0.0091964	NaN	NaN	-64.506	NaN	NaN	-64.658	NaN	NaN	-64.892	NaN	NaN	-64.413	NaN	NaN	-63.978
-0.0086983	NaN	NaN	-64.524	NaN	NaN	-64.634	NaN	NaN	-64.883	NaN	NaN	-64.37	NaN	NaN	-64.003
-0.0082001	NaN	NaN	-64.545	NaN	NaN	-64.615	NaN	NaN	-64.857	NaN	NaN	-64.32	NaN	NaN	-64.004
-0.0077019	NaN	NaN	-64.58	NaN	NaN	-64.58	NaN	NaN	-64.871	NaN	NaN	-64.298	NaN	NaN	-64.001
-0.0072037	NaN	NaN	-64.621	NaN	NaN	-64.584	NaN	NaN	-64.843	NaN	NaN	-64.271	NaN	NaN	-63.994
-0.0067055	NaN	NaN	-64.654	NaN	NaN	-64.635	NaN	NaN	-64.854	NaN	NaN	-64.335	NaN	NaN	-64.001
-0.0062073	NaN	NaN	-64.659	NaN	NaN	-64.626	NaN	NaN	-64.866	NaN	NaN	-64.371	NaN	NaN	-64.012
-0.0057092	NaN	NaN	-64.666	NaN	NaN	-64.63	NaN	NaN	-64.933	NaN	NaN	-64.366	NaN	NaN	-64.105
-0.005211	NaN	NaN	-64.581	NaN	NaN	-64.597	NaN	NaN	-64.947	NaN	NaN	-64.392	NaN	NaN	-64.131
-0.0047128	NaN	NaN	-64.535	NaN	NaN	-64.592	NaN	NaN	-64.987	NaN	NaN	-64.477	NaN	NaN	-64.154
-0.0042146	NaN	NaN	-64.51	NaN	NaN	-64.612	NaN	NaN	-65.028	NaN	NaN	-64.509	NaN	NaN	-64.193
-0.0037164	NaN	NaN	-64.466	NaN	NaN	-64.638	NaN	NaN	-64.987	NaN	NaN	-64.502	NaN	NaN	-64.241
-0.0032183	NaN	NaN	-64.39	NaN	NaN	-64.598	NaN	NaN	-64.999	NaN	NaN	-64.552	NaN	NaN	-64.218
-0.0027201	NaN	NaN	-64.333	NaN	NaN	-64.59	NaN	NaN	-64.973	NaN	NaN	-64.564	NaN	NaN	-64.221
-0.0022219	NaN	NaN	-64.347	NaN	NaN	-64.615	NaN	NaN	-64.895	NaN	NaN	-64.59	NaN	NaN	-64.215
-0.0017237	NaN	NaN	-64.372	NaN	NaN	-64.615	NaN	NaN	-64.883	NaN	NaN	-64.605	NaN	NaN	-64.241
-0.0012255	NaN	NaN	-64.423	NaN	NaN	-64.569	NaN	NaN	-64.865	NaN	NaN	-64.629	NaN	NaN	-64.247
-0.00072735	NaN	NaN	-64.532	NaN	NaN	-64.621	NaN	NaN	-64.892	NaN	NaN	-64.668	NaN	NaN	-64.267
-0.00022916	NaN	NaN	-64.693	NaN	NaN	-64.749	NaN	NaN	-64.959	NaN	NaN	-64.797	NaN	NaN	-64.389
0.00026902	NaN	NaN	-70.319	NaN	NaN	-66.534	NaN	NaN	-72.528	NaN	NaN	-69.245	NaN	NaN	-73.099
0.0007672	NaN	NaN	-72.613	NaN	NaN	-67.308	NaN	NaN	-77.798	NaN	NaN	-70.755	NaN	NaN	-76.965
0.0012654	NaN	NaN	-74.004	NaN	NaN	-67.802	NaN	NaN	-80.041	NaN	NaN	-71.852	NaN	NaN	-79.268
0.0017636	NaN	NaN	-75.452	NaN	NaN	-68.216	NaN	NaN	-82.07	NaN	NaN	-72.529	NaN	NaN	-81.843
0.0022617	NaN	NaN	-76.32	NaN	NaN	-68.652	NaN	NaN	-83.088	NaN	NaN	-73.16	NaN	NaN	-83.803
0.0027599	NaN	NaN	-77.343	NaN	NaN	-68.925	NaN	NaN	-84.777	NaN	NaN	-73.69	NaN	NaN	-85.324
0.0032581	NaN	NaN	-77.999	NaN	NaN	-69.292	NaN	NaN	-86.177	NaN	NaN	-74.321	NaN	NaN	-86.534
0.0037563	NaN	NaN	-78.921	NaN	NaN	-69.514	NaN	NaN	-87.303	NaN	NaN	-74.934	NaN	NaN	-88.305
0.0042545	NaN	NaN	-79.563	NaN	NaN	-69.606	NaN	NaN	-87.95	NaN	NaN	-75.28	NaN	NaN	-89.461
0.0047527	NaN	NaN	-80.283	NaN	NaN	-69.568	NaN	NaN	-88.833	NaN	NaN	-75.719	NaN	NaN	-90.829
0.0052508	NaN	NaN	-80.739	NaN	NaN	-69.687	NaN	NaN	-89.5	NaN	NaN	-76.114	NaN	NaN	-91.707
0.005749	NaN	NaN	-81.473	NaN	NaN	-69.822	NaN	NaN	-90.307	NaN	NaN	-76.487	NaN	NaN	-92.683
0.0062472	NaN	NaN	-81.861	NaN	NaN	-70.071	NaN	NaN	-90.919	NaN	NaN	-76.855	NaN	NaN	-93.587
0.0067454	NaN	NaN	-82.458	NaN	NaN	-70.431	NaN	NaN	-92.031	NaN	NaN	-77.08	NaN	NaN	-94.354
0.0072436	NaN	NaN	-82.976	NaN	NaN	-70.568	NaN	NaN	-92.413	NaN	NaN	-77.316	NaN	NaN	-95.268
0.0077417	NaN	NaN	-83.33	NaN	NaN	-70.721	NaN	NaN	-93.203	NaN	NaN	-77.613	NaN	NaN	-96.406
0.0082399	NaN	NaN	-83.562	NaN	NaN	-70.9	NaN	NaN	-93.592	NaN	NaN	-77.85	NaN	NaN	-97.128
0.0087381	NaN	NaN	-84.042	NaN	NaN	-70.992	NaN	NaN	-94.238	NaN	NaN	-78.012	NaN	NaN	-97.72
0.0092363	NaN	NaN	-84.424	NaN	NaN	-71.101	NaN	NaN	-94.749	NaN	NaN	-78.241	NaN	NaN	-98.37
0.0097345	NaN	NaN	-84.833	NaN	NaN	-71.228	NaN	NaN	-95.127	NaN	NaN	-78.453	NaN	NaN	-99.011
0.010233	NaN	NaN	-85.097	NaN	NaN	-71.294	NaN	NaN	-95.912	NaN	NaN	-78.727	NaN	NaN	-99.396
0.010731	NaN	NaN	-85.415	NaN	NaN	-71.389	NaN	NaN	-96.464	NaN	NaN	-78.865	NaN	NaN	-99.76
0.011229	NaN	NaN	-85.624	NaN	NaN	-71.491	NaN	NaN	-96.856	NaN	NaN	-78.965	NaN	NaN	-100.72
0.011727	NaN	NaN	-85.813	NaN	NaN	-71.532	NaN	NaN	-97.343	NaN	NaN	-79.078	NaN	NaN	-101.31
0.012225	NaN	NaN	-86.09	NaN	NaN	-71.549	NaN	NaN	-97.63	NaN	NaN	-79.236	NaN	NaN	-101.68
0.012724	NaN	NaN	-86.441	NaN	NaN	-71.605	NaN	NaN	-98.162	NaN	NaN	-79.373	NaN	NaN	-102.32
0.013222	NaN	NaN	-86.715	NaN	NaN	-71.696	NaN	NaN	-98.533	NaN	NaN	-79.517	NaN	NaN	-102.98
0.01372	NaN	NaN	-86.974	NaN	NaN	-71.88	NaN	NaN	-98.728	NaN	NaN	-79.678	NaN	NaN	-103.36
0.014218	NaN	NaN	-87.196	NaN	NaN	-72.031	NaN	NaN	-99.058	NaN	NaN	-79.851	NaN	NaN	-104.07
0.014716	NaN	NaN	-87.347	NaN	NaN	-72.126	NaN	NaN	-99.417	NaN	NaN	-79.944	NaN	NaN	-104.92
0.015214	NaN	NaN	-87.484	NaN	NaN	-72.163	NaN	NaN	-99.781	NaN	NaN	-80.061	NaN	NaN	-105.26
0.015713	NaN	NaN	-87.701	NaN	NaN	-72.185	NaN	NaN	-100.13	NaN	NaN	-80.114	NaN	NaN	-105.86
0.016211	NaN	NaN	-87.956	NaN	NaN	-72.172	NaN	NaN	-100.39	NaN	NaN	-80.176	NaN	NaN	-106.33
0.016709	NaN	NaN	-88.062	NaN	NaN	-72.186	NaN	NaN	-100.91	NaN	NaN	-80.178	NaN	NaN	-107.04
0.017207	NaN	NaN	-88.184	NaN	NaN	-72.186	NaN	NaN	-101.32	NaN	NaN	-80.226	NaN	NaN	-107.55
0.017705	NaN	NaN	-88.278	NaN	NaN	-72.175	NaN	NaN	-101.51	NaN	NaN	-80.246	NaN	NaN	-107.97
0.018204	NaN	NaN	-88.41	NaN	NaN	-72.182	NaN	NaN	-101.68	NaN	NaN	-80.352	NaN	NaN	-108.46
0.018702	NaN	NaN	-88.531	NaN	NaN	-72.24	NaN	NaN	-101.93	NaN	NaN	-80.428	NaN	NaN	-108.81
0.0192	NaN	NaN	-88.664	NaN	NaN	-72.273	NaN	NaN	-102.16	NaN	NaN	-80.57	NaN	NaN	-109.22
0.019698	NaN	NaN	-88.851	NaN	NaN	-72.303	NaN	NaN	-102.35	NaN	NaN	-80.652	NaN	NaN	-109.51
0.020196	NaN	NaN	-89.007	NaN	NaN	-72.29	NaN	NaN	-102.65	NaN	NaN	-80.731	NaN	NaN	-109.84
0.020694	NaN	NaN	-89.168	NaN	NaN	-72.071	NaN	NaN	-103.21	NaN	NaN	-80.788	NaN	NaN	-110.15
0.021193	NaN	NaN	-89.265	NaN	NaN	-72.136	NaN	NaN	-103.49	NaN	NaN	-80.907	NaN	NaN	-110.86
0.021691	NaN	NaN	-89.359	NaN	NaN	-72.253	NaN	NaN	-103.71	NaN	NaN	-80.946	NaN	NaN	-111.25
0.022189	NaN	NaN	-89.459	NaN	NaN	-72.281	NaN	NaN	-103.86	NaN	NaN	-81.013	NaN	NaN	-111.43
0.022687	NaN	NaN	-89.478	NaN	NaN	-72.311	NaN	NaN	-104.06	NaN	NaN	-81.076	NaN	NaN	-111.72
0.023185	NaN	NaN	-89.571	NaN	NaN	-72.328	NaN	NaN	-104.37	NaN	NaN	-81.088	NaN	NaN	-112.33
0.023684	NaN	NaN	-89.791	NaN	NaN	-72.391	NaN	NaN	-104.65	NaN	NaN	-81.125	NaN	NaN	-112.46
0.024182	NaN	NaN	-89.873	NaN	NaN	-72.418	NaN	NaN	-104.85	NaN	NaN	-81.121	NaN	NaN	-112.84
0.02468	NaN	NaN	-89.941	NaN	NaN	-72.442	NaN	NaN	-105.01	NaN	NaN	-81.121	NaN	NaN	-112.99
0.025178	NaN	NaN	-89.956	NaN	NaN	-72.401	NaN	NaN	-105.16	NaN	NaN	-81.093	NaN	NaN	-113.19
0.025676	NaN	NaN	-90.018	NaN	NaN	-72.424	NaN	NaN	-105.29	NaN	NaN	-81.061	NaN	NaN	-113.53
0.026174	NaN	NaN	-90.098	NaN	NaN	-72.475	NaN	NaN	-105.63	NaN	NaN	-81.052	NaN	NaN	-113.69
0.026673	NaN	NaN	-90.179	NaN	NaN	-72.491	NaN	NaN	-105.88	NaN	NaN	-81.121	NaN	NaN	-114.05
0.027171	NaN	NaN	-90.298	NaN	NaN	-72.544	NaN	NaN	-106.06	NaN	NaN	-81.167	NaN	NaN	-114.17
0.027669	NaN	NaN	-90.438	NaN	NaN	-72.346	NaN	NaN	-106.19	NaN	NaN	-81.227	NaN	NaN	-114.64
0.028167	NaN	NaN	-90.517	NaN	NaN	-72.423	NaN	NaN	-106.43	NaN	NaN	-81.227	NaN	NaN	-114.97
0.028665	NaN	NaN	-90.58	NaN	NaN	-72.478	NaN	NaN	-106.52	NaN	NaN	-81.257	NaN	NaN	-115.15
0.029164	NaN	NaN	-90.792	NaN	NaN	-72.533	NaN	NaN	-106.74	NaN	NaN	-81.323	NaN	NaN	-115.36
0.029662	NaN	NaN	-90.881	NaN	NaN	-72.595	NaN	NaN	-107.04	NaN	NaN	-81.396	NaN	NaN	-115.74
0.03016	NaN	NaN	-91.018	NaN	NaN	-72.629	NaN	NaN	-107.25	NaN	NaN	-81.42	NaN	NaN	-116.06
0.030658	NaN	NaN	-91.137	NaN	NaN	-72.703	NaN	NaN	-107.42	NaN	NaN	-81.446	NaN	NaN	-116.26
0.031156	NaN	NaN	-91.133	NaN	NaN	-72.738	NaN	NaN	-107.51	NaN	NaN	-81.436	NaN	NaN	-116.59
0.031654	NaN	NaN	-91.019	NaN	NaN	-72.771	NaN	NaN	-107.68	NaN	NaN	-81.469	NaN	NaN	-116.8
0.032153	NaN	NaN	-91.065	NaN	NaN	-72.756	NaN	NaN	-107.82	NaN	NaN	-81.491	NaN	NaN	-117.46
0.032651	NaN	NaN	-91.078	NaN	NaN	-72.652	NaN	NaN	-107.84	NaN	NaN	-81.552	NaN	NaN	-117.73
0.033149	NaN	NaN	-91.109	NaN	NaN	-72.555	NaN	NaN	-107.91	NaN	NaN	-81.581	NaN	NaN	-117.85
0.033647	NaN	NaN	-91.181	NaN	NaN	-72.583	NaN	NaN	-107.99	NaN	NaN	-81.619	NaN	NaN	-117.99
0.034145	NaN	NaN	-91.181	NaN	NaN	-72.623	NaN	NaN	-108.02	NaN	NaN	-81.63	NaN	NaN	-118.1
0.034644	NaN	NaN	-91.183	NaN	NaN	-72.681	NaN	NaN	-108.06	NaN	NaN	-81.685	NaN	NaN	-118.39
0.035142	NaN	NaN	-91.177	NaN	NaN	-72.704	NaN	NaN	-108	NaN	NaN	-81.724	NaN	NaN	-118.54
0.03564	NaN	NaN	-91.107	NaN	NaN	-72.665	NaN	NaN	-108.11	NaN	NaN	-81.806	NaN	NaN	-118.58
0.036138	NaN	NaN	-91.058	NaN	NaN	-72.647	NaN	NaN	-108.17	NaN	NaN	-81.797	NaN	NaN	-118.75
0.036636	NaN	NaN	-91.136	NaN	NaN	-72.672	NaN	NaN	-108.22	NaN	NaN	-81.779	NaN	NaN	-118.82
0.037134	NaN	NaN	-91.205	NaN	NaN	-72.7	NaN	NaN	-108.44	NaN	NaN	-81.753	NaN	NaN	-118.82
0.037633	NaN	NaN	-91.304	NaN	NaN	-72.737	NaN	NaN	-108.63	NaN	NaN	-81.679	NaN	NaN	-118.73
0.038131	NaN	NaN	-91.302	NaN	NaN	-72.8	NaN	NaN	-108.67	NaN	NaN	-81.651	NaN	NaN	-118.81
0.038629	NaN	NaN	-91.299	NaN	NaN	-72.88	NaN	NaN	-108.74	NaN	NaN	-81.658	NaN	NaN	-118.89
0.039127	NaN	NaN	-91.278	NaN	NaN	-72.954	NaN	NaN	-108.83	NaN	NaN	-81.658	NaN	NaN	-119.18
0.039625	NaN	NaN	-91.26	NaN	NaN	-72.987	NaN	NaN	-108.64	NaN	NaN	-81.673	NaN	NaN	-119.37
0.040124	NaN	NaN	-91.318	NaN	NaN	-72.987	NaN	NaN	-108.64	NaN	NaN	-81.67	NaN	NaN	-119.42
0.040622	NaN	NaN	-91.346	NaN	NaN	-72.961	NaN	NaN	-108.72	NaN	NaN	-81.692	NaN	NaN	-119.4
0.04112	NaN	NaN	-91.334	NaN	NaN	-72.979	NaN	NaN	-108.88	NaN	NaN	-81.777	NaN	NaN	-119.34
0.041618	NaN	NaN	-91.4	NaN	NaN	-72.974	NaN	NaN	-108.96	NaN	NaN	-81.864	NaN	NaN	-119.28
0.042116	NaN	NaN	-91.472	-72.379	NaN	-72.691	NaN	NaN	-109	NaN	NaN	-81.914	NaN	NaN	-119.39
0.042614	NaN	NaN	-91.483	-72.378	NaN	-72.678	NaN	NaN	-108.97	NaN	NaN	-81.946	NaN	NaN	-119.52
0.043113	NaN	NaN	-91.513	-72.377	NaN	-72.682	NaN	NaN	-109.15	NaN	NaN	-81.966	NaN	NaN	-119.6
0.043611	NaN	NaN	-91.514	-72.376	NaN	-72.707	NaN	NaN	-109.2	NaN	NaN	-82.014	NaN	NaN	-119.58
0.044109	NaN	NaN	-91.527	-72.376	NaN	-72.774	NaN	NaN	-109.33	NaN	NaN	-81.967	NaN	NaN	-119.61
0.044607	NaN	NaN	-91.51	-72.375	NaN	-72.823	NaN	NaN	-109.36	NaN	NaN	-81.962	NaN	NaN	-119.62
0.045105	NaN	NaN	-91.513	-72.374	NaN	-72.743	NaN	NaN	-109.33	NaN	NaN	-81.965	NaN	NaN	-119.69
0.045604	NaN	NaN	-91.497	-72.373	NaN	-72.71	NaN	NaN	-109.26	NaN	NaN	-81.997	NaN	NaN	-119.85
0.046102	NaN	NaN	-91.486	-72.372	NaN	-72.7	NaN	NaN	-109.21	NaN	NaN	-81.954	NaN	NaN	-120.02
0.0466	NaN	NaN	-91.508	-72.371	NaN	-72.7	NaN	NaN	-109.17	NaN	NaN	-81.98	NaN	NaN	-120.09
0.047098	NaN	NaN	-91.544	-72.37	NaN	-72.698	NaN	NaN	-109.22	-81.878	NaN	-81.97	NaN	NaN	-120.27
0.047596	NaN	NaN	-91.556	-72.37	NaN	-72.672	NaN	NaN	-109.29	-81.874	NaN	-81.921	NaN	NaN	-120.37
0.048094	NaN	NaN	-91.644	-72.369	NaN	-72.712	NaN	NaN	-109.35	-81.869	NaN	-81.914	NaN	NaN	-120.45
0.048593	NaN	NaN	-91.744	-72.368	NaN	-72.801	NaN	NaN	-109.37	-81.865	NaN	-81.903	NaN	NaN	-120.55
0.049091	NaN	NaN	-91.724	-72.367	NaN	-72.875	NaN	NaN	-109.37	-81.861	NaN	-81.855	NaN	NaN	-120.64
0.049589	NaN	NaN	-91.714	-72.366	NaN	-72.807	NaN	NaN	-109.38	-81.857	NaN	-81.824	NaN	NaN	-120.83
0.050087	NaN	NaN	-91.705	-72.365	NaN	-72.731	NaN	NaN	-109.29	-81.853	NaN	-81.813	NaN	NaN	-120.97
0.050585	NaN	NaN	-91.786	-72.365	NaN	-72.78	NaN	NaN	-109.26	-81.848	NaN	-81.803	NaN	NaN	-121.04
0.051084	NaN	NaN	-91.819	-72.364	NaN	-72.764	NaN	NaN	-109.3	-81.844	NaN	-81.78	NaN	NaN	-121.23
0.051582	NaN	NaN	-91.849	-72.363	NaN	-72.495	NaN	NaN	-109.35	-81.84	NaN	-81.776	NaN	NaN	-121.3
0.05208	NaN	NaN	-91.911	-72.362	NaN	-72.366	NaN	NaN	-109.39	-81.836	NaN	-81.77	NaN	NaN	-121.46
0.052578	NaN	NaN	-92.068	-72.361	NaN	-72.37	NaN	NaN	-109.39	-81.831	NaN	-81.77	NaN	NaN	-121.64
0.053076	NaN	NaN	-92.161	-72.36	NaN	-72.405	NaN	NaN	-109.32	-81.827	NaN	-81.731	NaN	NaN	-121.81
0.053574	NaN	NaN	-92.196	-72.359	NaN	-72.439	NaN	NaN	-109.23	-81.823	NaN	-81.71	NaN	NaN	-121.95
0.054073	NaN	NaN	-92.249	-72.359	NaN	-72.462	NaN	NaN	-109.26	-81.819	NaN	-81.727	NaN	NaN	-122.13
0.054571	NaN	NaN	-92.252	-72.358	NaN	-72.468	NaN	NaN	-109.28	-81.814	NaN	-81.746	NaN	NaN	-122.13
0.055069	NaN	NaN	-92.252	-72.357	NaN	-72.501	NaN	NaN	-109.39	-81.81	NaN	-81.774	NaN	NaN	-122.13
0.055567	NaN	NaN	-92.215	-72.356	NaN	-72.512	NaN	NaN	-109.44	-81.806	NaN	-81.805	NaN	NaN	-121.76
0.056065	NaN	NaN	-92.154	-72.355	NaN	-72.546	NaN	NaN	-109.47	-81.802	NaN	-81.842	NaN	NaN	-121.86
0.056564	NaN	NaN	-91.895	-72.354	NaN	-72.553	NaN	NaN	-109.52	-81.798	NaN	-81.861	NaN	NaN	-121.95
0.057062	-91.475	NaN	-91.88	-72.354	NaN	-72.604	-108.24	NaN	-109.47	-81.793	NaN	-81.882	NaN	NaN	-121.95
0.05756	-91.465	NaN	-91.878	-72.353	NaN	-72.667	-108.22	NaN	-109.47	-81.789	NaN	-81.87	NaN	NaN	-121.76
0.058058	-91.456	NaN	-91.92	-72.352	NaN	-72.716	-108.19	NaN	-109.53	-81.785	NaN	-81.858	NaN	NaN	-121.66
0.058556	-91.446	NaN	-91.945	-72.351	NaN	-72.723	-108.16	NaN	-109.53	-81.781	NaN	-81.884	NaN	NaN	-121.72
0.059054	-91.437	NaN	-91.927	-72.35	NaN	-72.717	-108.14	NaN	-109.51	-81.777	NaN	-81.859	NaN	NaN	-121.83
0.059553	-91.427	NaN	-91.872	-72.349	NaN	-72.714	-108.11	NaN	-109.48	-81.773	NaN	-81.792	NaN	NaN	-121.99
0.060051	-91.418	NaN	-91.786	-72.348	NaN	-72.669	-108.09	NaN	-109.47	-81.768	NaN	-81.761	NaN	NaN	-122.3
0.060549	-91.408	NaN	-91.716	-72.348	NaN	-72.605	-108.06	NaN	-109.38	-81.764	NaN	-81.757	NaN	NaN	-122.49
0.061047	-91.399	NaN	-91.713	-72.347	NaN	-72.56	-108.03	NaN	-109.49	-81.76	NaN	-81.73	NaN	NaN	-122.63
0.061545	-91.389	NaN	-91.718	-72.346	NaN	-72.407	-108.01	NaN	-109.5	-81.756	NaN	-81.736	NaN	NaN	-122.66
0.062044	-91.38	NaN	-91.775	-72.345	NaN	-72.393	-107.98	NaN	-109.47	-81.752	NaN	-81.748	NaN	NaN	-122.68
0.062542	-91.37	NaN	-91.822	-72.344	NaN	-72.414	-107.95	NaN	-109.45	-81.747	NaN	-81.738	NaN	NaN	-122.68
0.06304	-91.361	NaN	-91.902	-72.343	NaN	-72.498	-107.93	NaN	-109.45	-81.743	NaN	-81.759	NaN	NaN	-122.77
0.063538	-91.351	NaN	-91.965	-72.343	NaN	-72.521	-107.9	NaN	-109.25	-81.739	NaN	-81.811	NaN	NaN	-122.71
0.064036	-91.342	NaN	-91.997	-72.342	NaN	-72.562	-107.87	NaN	-109.14	-81.735	NaN	-81.824	NaN	NaN	-122.66
0.064534	-91.333	NaN	-92.006	-72.341	NaN	-72.516	-107.85	NaN	-109.15	-81.731	NaN	-81.856	-121.93	NaN	-122.62
0.065033	-91.323	NaN	-91.939	-72.34	NaN	-72.504	-107.82	NaN	-108.92	-81.727	NaN	-81.881	-121.84	NaN	-122.62
0.065531	-91.314	NaN	-91.849	-72.339	NaN	-72.465	-107.8	NaN	-108.74	-81.723	NaN	-81.881	-121.75	NaN	-122.59
0.066029	-91.304	NaN	-91.756	-72.338	NaN	-72.419	-107.77	NaN	-108.73	-81.718	NaN	-81.858	-121.66	NaN	-122.64
0.066527	-91.295	NaN	-91.663	-72.338	NaN	-72.427	-107.74	NaN	-108.59	-81.714	NaN	-81.866	-121.57	NaN	-122.71
0.067025	-91.285	NaN	-91.598	-72.337	NaN	-72.462	-107.72	NaN	-108.75	-81.71	NaN	-81.831	-121.49	NaN	-122.75
0.067524	-91.276	NaN	-91.523	-72.336	NaN	-72.494	-107.69	NaN	-108.9	-81.706	NaN	-81.834	-121.4	NaN	-122.7
0.068022	-91.267	NaN	-91.457	-72.335	NaN	-72.479	-107.67	NaN	-108.99	-81.702	NaN	-81.858	-121.31	NaN	-122.67
0.06852	-91.257	NaN	-91.43	-72.334	NaN	-72.491	-107.64	NaN	-109.09	-81.698	NaN	-81.874	-121.22	NaN	-122.37
0.069018	-91.248	NaN	-91.402	-72.333	NaN	-72.272	-107.62	NaN	-109.21	-81.694	NaN	-81.885	-121.14	NaN	-122.27
0.069516	-91.239	NaN	-91.471	-72.332	NaN	-72.251	-107.59	NaN	-109.25	-81.689	NaN	-81.926	-121.05	NaN	-122.17
0.070014	-91.229	NaN	-91.508	-72.332	NaN	-72.265	-107.56	NaN	-109.34	-81.685	NaN	-81.929	-120.97	NaN	-122.11
0.070513	-91.22	NaN	-91.56	-72.331	NaN	-72.352	-107.54	NaN	-109.39	-81.681	NaN	-81.913	-120.88	NaN	-122.05
0.071011	-91.211	NaN	-91.583	-72.33	NaN	-72.446	-107.51	NaN	-109.42	-81.677	NaN	-81.865	-120.79	NaN	-121.97
0.071509	-91.201	NaN	-91.601	-72.329	NaN	-72.443	-107.49	NaN	-109.44	-81.673	NaN	-81.803	-120.71	NaN	-121.6
0.072007	-91.192	NaN	-91.606	-72.328	NaN	-72.447	-107.46	NaN	-109.45	-81.669	NaN	-81.71	-120.62	NaN	-121.37
0.072505	-91.183	NaN	-91.669	-72.327	NaN	-72.481	-107.44	NaN	-109.34	-81.665	NaN	-81.66	-120.54	NaN	-121.19
0.073004	-91.173	NaN	-91.682	-72.327	NaN	-72.494	-107.41	NaN	-109.19	-81.661	NaN	-81.617	-120.45	NaN	-121.03
0.073502	-91.164	NaN	-91.699	-72.326	NaN	-72.546	-107.38	NaN	-109.13	-81.657	NaN	-81.564	-120.37	NaN	-120.96
0.074	-91.155	NaN	-91.677	-72.325	NaN	-72.577	-107.36	NaN	-109.12	-81.652	NaN	-81.564	-120.29	NaN	-120.91
0.074498	-91.146	NaN	-91.661	-72.324	NaN	-72.575	-107.33	NaN	-108.98	-81.648	NaN	-81.571	-120.2	NaN	-120.91
0.074996	-91.136	NaN	-91.666	-72.323	NaN	-72.525	-107.31	NaN	-108.97	-81.644	NaN	-81.602	-120.12	NaN	-120.91
0.075494	-91.127	NaN	-91.642	-72.322	NaN	-72.355	-107.28	NaN	-108.98	-81.64	NaN	-81.63	-120.04	NaN	-120.97
0.075993	-91.118	NaN	-91.658	-72.322	NaN	-72.171	-107.26	NaN	-108.95	-81.636	NaN	-81.691	-119.95	NaN	-121.02
0.076491	-91.109	NaN	-91.63	-72.321	NaN	-72.169	-107.23	NaN	-108.99	-81.632	NaN	-81.744	-119.87	NaN	-121.03
0.076989	-91.099	NaN	-91.654	-72.32	NaN	-72.193	-107.21	NaN	-109.04	-81.628	NaN	-81.742	-119.79	NaN	-121.01
0.077487	-91.09	NaN	-91.653	-72.319	NaN	-72.234	-107.18	NaN	-109.04	-81.624	NaN	-81.626	-119.7	NaN	-120.93
0.077985	-91.081	NaN	-91.668	-72.318	NaN	-72.221	-107.16	NaN	-109.01	-81.62	NaN	-81.443	-119.62	NaN	-120.68
0.078484	-91.072	NaN	-91.702	-72.317	NaN	-72.218	-107.13	NaN	-109.01	-81.616	NaN	-81.385	-119.54	NaN	-120.68
0.078982	-91.063	NaN	-91.784	-72.317	NaN	-72.224	-107.11	NaN	-108.98	-81.612	NaN	-81.35	-119.46	NaN	-120.74
0.07948	-91.053	NaN	-91.788	-72.316	NaN	-72.234	-107.08	NaN	-108.61	-81.608	NaN	-81.364	-119.38	NaN	-120.81
0.079978	-91.044	NaN	-91.745	-72.315	NaN	-72.3	-107.05	NaN	-108.52	-81.603	NaN	-81.32	-119.3	NaN	-120.81
0.080476	-91.035	NaN	-91.708	-72.314	NaN	-72.472	-107.03	NaN	-108.41	-81.599	NaN	-81.305	-119.22	NaN	-120.83
0.080974	-91.026	NaN	-91.675	-72.313	NaN	-72.525	-107	NaN	-108.38	-81.595	NaN	-81.348	-119.14	NaN	-120.76
0.081473	-91.017	NaN	-91.676	-72.312	NaN	-72.573	-106.98	NaN	-108.43	-81.591	NaN	-81.411	-119.06	NaN	-120.65
0.081971	-91.008	NaN	-91.685	-72.312	NaN	-72.605	-106.95	NaN	-108.43	-81.587	NaN	-81.474	-118.98	NaN	-120.42
0.082469	-90.998	NaN	-91.673	-72.311	NaN	-72.615	-106.93	NaN	-108.51	-81.583	NaN	-81.508	-118.9	NaN	-120.34
0.082967	-90.989	NaN	-91.654	-72.31	NaN	-72.627	-106.9	NaN	-108.65	-81.579	NaN	-81.545	-118.82	NaN	-120.2
0.083465	-90.98	NaN	-91.657	-72.309	NaN	-72.677	-106.88	NaN	-108.67	-81.575	NaN	-81.579	-118.74	NaN	-120.16
0.083964	-90.971	NaN	-91.665	-72.308	NaN	-72.684	-106.85	NaN	-108.66	-81.571	NaN	-81.604	-118.66	NaN	-120.07
0.084462	-90.962	NaN	-91.645	-72.307	NaN	-72.699	-106.83	NaN	-108.75	-81.567	NaN	-81.614	-118.58	NaN	-119.89
0.08496	-90.953	NaN	-91.639	-72.307	NaN	-72.713	-106.81	NaN	-108.77	-81.563	NaN	-81.631	-118.5	NaN	-119.75
0.085458	-90.944	NaN	-91.648	-72.306	NaN	-72.725	-106.78	NaN	-108.71	-81.559	NaN	-81.632	-118.42	NaN	-119.65
0.085956	-90.935	NaN	-91.621	-72.305	NaN	-72.726	-106.76	NaN	-108.65	-81.555	NaN	-81.581	-118.35	NaN	-119.55
0.086454	-90.926	NaN	-91.586	-72.304	NaN	-72.723	-106.73	NaN	-108.53	-81.551	NaN	-81.537	-118.27	NaN	-119.5
0.086953	-90.917	NaN	-91.597	-72.303	NaN	-72.723	-106.71	NaN	-108.46	-81.547	NaN	-81.514	-118.19	NaN	-119.37
0.087451	-90.908	NaN	-91.598	-72.302	NaN	-72.67	-106.68	NaN	-108.42	-81.543	NaN	-81.472	-118.11	NaN	-119.16
0.087949	-90.898	NaN	-91.616	-72.302	NaN	-72.626	-106.66	NaN	-108.42	-81.539	NaN	-81.449	-118.04	NaN	-118.94
0.088447	-90.889	NaN	-91.693	-72.301	NaN	-72.579	-106.63	NaN	-108.38	-81.535	NaN	-81.438	-117.96	NaN	-118.92
0.088945	-90.88	NaN	-91.708	-72.3	NaN	-72.576	-106.61	NaN	-108.24	-81.531	NaN	-81.469	-117.88	NaN	-119
0.089444	-90.871	NaN	-91.711	-72.299	NaN	-72.534	-106.58	NaN	-108.18	-81.527	NaN	-81.483	-117.81	NaN	-118.92
0.089942	-90.862	NaN	-91.645	-72.298	NaN	-72.549	-106.56	NaN	-108.24	-81.523	NaN	-81.517	-117.73	NaN	-118.75
0.09044	-90.853	NaN	-91.54	-72.297	NaN	-72.542	-106.53	NaN	-108.24	-81.519	NaN	-81.556	-117.66	NaN	-118.75
0.090938	-90.844	NaN	-91.338	-72.297	NaN	-72.533	-106.51	NaN	-108.24	-81.515	NaN	-81.526	-117.58	NaN	-118.61
0.091436	-90.835	NaN	-91.22	-72.296	NaN	-72.507	-106.49	NaN	-108.27	-81.511	NaN	-81.479	-117.5	NaN	-118.63
0.091934	-90.826	NaN	-91.185	-72.295	NaN	-72.521	-106.46	NaN	-108.29	-81.507	NaN	-81.464	-117.43	NaN	-118.56
0.092433	-90.817	NaN	-91.167	-72.294	NaN	-72.531	-106.44	NaN	-108.29	-81.503	NaN	-81.409	-117.35	NaN	-118.46
0.092931	-90.808	NaN	-91.164	-72.293	NaN	-72.532	-106.41	NaN	-108.22	-81.499	NaN	-81.285	-117.28	NaN	-118.46
0.093429	-90.8	NaN	-91.174	-72.292	NaN	-72.574	-106.39	NaN	-108.13	-81.495	NaN	-81.266	-117.21	NaN	-118.45
0.093927	-90.791	NaN	-91.17	-72.292	NaN	-72.636	-106.36	NaN	-107.9	-81.491	NaN	-81.3	-117.13	NaN	-118.47
0.094425	-90.782	NaN	-91.093	-72.291	NaN	-72.663	-106.34	NaN	-107.64	-81.487	NaN	-81.309	-117.06	NaN	-118.56
0.094924	-90.773	NaN	-91.155	-72.29	NaN	-72.696	-106.32	NaN	-107.42	-81.483	NaN	-81.447	-116.98	NaN	-118.55
0.095422	-90.764	NaN	-91.168	-72.289	NaN	-72.75	-106.29	NaN	-107.27	-81.479	NaN	-81.551	-116.91	NaN	-118.52
0.09592	-90.755	NaN	-91.148	-72.288	NaN	-72.773	-106.27	NaN	-107.19	-81.475	NaN	-81.591	-116.84	NaN	-118.48
0.096418	-90.746	NaN	-91.115	-72.287	NaN	-72.766	-106.24	NaN	-107.16	-81.471	NaN	-81.649	-116.76	NaN	-118.38
0.096916	-90.737	NaN	-91.054	-72.287	NaN	-72.724	-106.22	NaN	-107.18	-81.467	NaN	-81.697	-116.69	NaN	-118.29
0.097414	-90.728	NaN	-91.026	-72.286	NaN	-72.583	-106.19	NaN	-107.16	-81.463	NaN	-81.676	-116.62	NaN	-118.35
0.097913	-90.719	NaN	-90.946	-72.285	NaN	-72.507	-106.17	NaN	-107.22	-81.459	NaN	-81.649	-116.55	NaN	-118.27
0.098411	-90.71	NaN	-90.926	-72.284	NaN	-72.456	-106.15	NaN	-107.22	-81.455	NaN	-81.612	-116.47	NaN	-118.13
0.098909	-90.701	NaN	-90.971	-72.283	NaN	-72.44	-106.12	NaN	-107.14	-81.451	NaN	-81.532	-116.4	NaN	-118.12
0.099407	-90.693	NaN	-91.014	-72.282	NaN	-72.447	-106.1	NaN	-106.94	-81.447	NaN	-81.524	-116.33	NaN	-118.08
0.099905	-90.684	NaN	-91.022	-72.282	NaN	-72.462	-106.08	NaN	-106.83	-81.443	NaN	-81.522	-116.26	NaN	-118.04
0.1004	-90.675	NaN	-91.027	-72.281	NaN	-72.451	-106.05	NaN	-106.58	-81.439	NaN	-81.583	-116.19	NaN	-117.94
0.1009	-90.666	NaN	-91.008	-72.28	NaN	-72.438	-106.03	NaN	-106.56	-81.435	NaN	-81.626	-116.12	NaN	-118.03
0.1014	-90.657	NaN	-90.995	-72.279	NaN	-72.456	-106	NaN	-106.58	-81.431	NaN	-81.632	-116.05	NaN	-117.95
0.1019	-90.648	NaN	-90.939	-72.278	NaN	-72.516	-105.98	NaN	-106.61	-81.427	NaN	-81.61	-115.98	NaN	-117.88
0.1024	-90.64	NaN	-90.907	-72.277	NaN	-72.596	-105.96	NaN	-106.69	-81.423	NaN	-81.568	-115.91	NaN	-117.91
0.10289	-90.631	NaN	-90.919	-72.277	NaN	-72.655	-105.93	NaN	-106.8	-81.42	NaN	-81.522	-115.84	NaN	-117.91
0.10339	-90.622	NaN	-90.962	-72.276	NaN	-72.69	-105.91	NaN	-106.95	-81.416	NaN	-81.521	-115.77	NaN	-117.75
0.10389	-90.613	NaN	-90.94	-72.275	NaN	-72.661	-105.89	NaN	-106.98	-81.412	NaN	-81.485	-115.7	NaN	-117.4
0.10439	-90.604	NaN	-91.005	-72.274	NaN	-72.636	-105.86	NaN	-107.11	-81.408	NaN	-81.431	-115.63	NaN	-117.22
0.10489	-90.596	NaN	-90.984	-72.273	NaN	-72.633	-105.84	NaN	-107.03	-81.404	NaN	-81.224	-115.56	NaN	-117.07
0.10539	-90.587	NaN	-90.914	-72.273	NaN	-72.618	-105.81	NaN	-107.08	-81.4	NaN	-81.17	-115.49	NaN	-116.94
0.10588	-90.578	NaN	-90.88	-72.272	NaN	-72.565	-105.79	NaN	-107.08	-81.396	NaN	-81.139	-115.42	NaN	-116.42
0.10638	-90.569	NaN	-90.844	-72.271	NaN	-72.566	-105.77	NaN	-106.93	-81.392	NaN	-81.183	-115.35	NaN	-115.55
0.10688	-90.561	NaN	-90.736	-72.27	NaN	-72.559	-105.74	NaN	-106.78	-81.388	NaN	-81.189	-115.28	NaN	-115.46
0.10738	-90.552	NaN	-90.703	-72.269	NaN	-72.533	-105.72	NaN	-106.66	-81.384	NaN	-81.216	-115.21	NaN	-115.33
0.10788	-90.543	NaN	-90.669	-72.268	NaN	-72.526	-105.7	NaN	-106.56	-81.38	NaN	-81.263	-115.15	NaN	-115.23
0.10837	-90.534	NaN	-90.633	-72.268	NaN	-72.501	-105.67	NaN	-106.5	-81.376	NaN	-81.29	-115.08	NaN	-115.13
0.10887	-90.526	NaN	-90.641	-72.267	NaN	-72.456	-105.65	NaN	-106.57	-81.372	NaN	-81.321	-115.01	NaN	-114.98
0.10937	-90.517	NaN	-90.658	-72.266	NaN	-72.451	-105.63	NaN	-106.47	-81.369	NaN	-81.412	-114.94	NaN	-114.89
0.10987	-90.508	NaN	-90.718	-72.265	NaN	-72.417	-105.6	NaN	-106.39	-81.365	NaN	-81.472	-114.88	NaN	-114.89
0.11037	-90.5	NaN	-90.782	-72.264	NaN	-72.332	-105.58	NaN	-106.36	-81.361	NaN	-81.538	-114.81	NaN	-114.84
0.11087	-90.491	NaN	-90.828	-72.263	NaN	-72.351	-105.56	NaN	-106.36	-81.357	NaN	-81.604	-114.74	NaN	-114.91
0.11136	-90.482	NaN	-90.83	-72.263	NaN	-72.362	-105.53	NaN	-106.35	-81.353	NaN	-81.613	-114.68	NaN	-114.91
0.11186	-90.474	NaN	-90.813	-72.262	NaN	-72.385	-105.51	NaN	-106.42	-81.349	NaN	-81.649	-114.61	NaN	-114.8
0.11236	-90.465	NaN	-90.791	-72.261	NaN	-72.421	-105.49	NaN	-106.51	-81.345	NaN	-81.621	-114.54	NaN	-114.86
0.11286	-90.456	NaN	-90.735	-72.26	NaN	-72.441	-105.46	NaN	-106.53	-81.341	NaN	-81.583	-114.48	NaN	-114.99
0.11336	-90.448	NaN	-90.649	-72.259	NaN	-72.427	-105.44	NaN	-106.5	-81.337	NaN	-81.517	-114.41	NaN	-115.06
0.11385	-90.439	NaN	-90.594	-72.258	NaN	-72.33	-105.42	NaN	-106.48	-81.334	NaN	-81.465	-114.35	NaN	-115.06
0.11435	-90.43	NaN	-90.606	-72.258	NaN	-72.22	-105.4	NaN	-106.34	-81.33	NaN	-81.433	-114.28	NaN	-115.06
0.11485	-90.422	NaN	-90.586	-72.257	NaN	-72.157	-105.37	NaN	-105.88	-81.326	NaN	-81.414	-114.22	NaN	-114.96
0.11535	-90.413	NaN	-90.568	-72.256	NaN	-72.134	-105.35	NaN	-105.88	-81.322	NaN	-81.443	-114.15	NaN	-114.88
0.11585	-90.404	NaN	-90.492	-72.255	NaN	-72.117	-105.33	NaN	-105.88	-81.318	NaN	-81.445	-114.09	NaN	-114.88
0.11635	-90.396	NaN	-90.318	-72.254	NaN	-72.137	-105.3	NaN	-106.2	-81.314	NaN	-81.46	-114.02	NaN	-114.79
0.11684	-90.387	NaN	-90.375	-72.254	NaN	-72.137	-105.28	NaN	-106.3	-81.31	NaN	-81.495	-113.96	NaN	-114.76
0.11734	-90.379	NaN	-90.448	-72.253	NaN	-72.186	-105.26	NaN	-106.38	-81.307	NaN	-81.475	-113.89	NaN	-114.6
0.11784	-90.37	NaN	-90.494	-72.252	NaN	-72.143	-105.23	NaN	-106.43	-81.303	NaN	-81.448	-113.83	NaN	-114.68
0.11834	-90.362	NaN	-90.483	-72.251	NaN	-72.121	-105.21	NaN	-106.49	-81.299	NaN	-81.457	-113.77	NaN	-114.57
0.11884	-90.353	NaN	-90.437	-72.25	NaN	-72.105	-105.19	NaN	-106.44	-81.295	NaN	-81.413	-113.7	NaN	-114.54
0.11933	-90.344	NaN	-90.373	-72.249	NaN	-72.111	-105.17	NaN	-106.35	-81.291	NaN	-81.385	-113.64	NaN	-114.41
0.11983	-90.336	NaN	-90.243	-72.249	NaN	-72.066	-105.14	NaN	-106.24	-81.287	NaN	-81.393	-113.58	NaN	-114.41
0.12033	-90.327	NaN	-90.036	-72.248	NaN	-72.048	-105.12	NaN	-106.17	-81.283	NaN	-81.449	-113.51	NaN	-114.22
0.12083	-90.319	NaN	-89.903	-72.247	NaN	-72.019	-105.1	NaN	-106.15	-81.28	NaN	-81.477	-113.45	NaN	-114.02
0.12133	-90.31	NaN	-89.877	-72.246	NaN	-72.034	-105.08	NaN	-106.19	-81.276	NaN	-81.509	-113.39	NaN	-113.79
0.12183	-90.302	NaN	-89.885	-72.245	NaN	-72.074	-105.05	NaN	-106.25	-81.272	NaN	-81.53	-113.33	NaN	-113.73
0.12232	-90.293	NaN	-89.893	-72.245	NaN	-72.143	-105.03	NaN	-106.38	-81.268	NaN	-81.568	-113.26	NaN	-113.7
0.12282	-90.285	NaN	-89.915	-72.244	NaN	-72.124	-105.01	NaN	-106.39	-81.264	NaN	-81.555	-113.2	NaN	-113.69
0.12332	-90.276	NaN	-90	-72.243	NaN	-72.195	-104.99	NaN	-106.38	-81.26	NaN	-81.601	-113.14	NaN	-113.61
0.12382	-90.268	NaN	-90.089	-72.242	NaN	-72.253	-104.96	NaN	-106.34	-81.257	NaN	-81.603	-113.08	NaN	-113.47
0.12432	-90.259	NaN	-90.15	-72.241	NaN	-72.279	-104.94	NaN	-106.32	-81.253	NaN	-81.658	-113.02	NaN	-113.42
0.12481	-90.251	NaN	-90.174	-72.24	NaN	-72.233	-104.92	NaN	-106.32	-81.249	NaN	-81.661	-112.96	NaN	-113.45
0.12531	-90.242	NaN	-90.149	-72.24	NaN	-72.157	-104.9	NaN	-106.18	-81.245	NaN	-81.623	-112.9	NaN	-113.45
0.12581	-90.234	NaN	-90.077	-72.239	NaN	-71.937	-104.87	NaN	-106.03	-81.241	NaN	-81.539	-112.84	NaN	-113.45
0.12631	-90.225	NaN	-90.041	-72.238	NaN	-71.87	-104.85	NaN	-105.94	-81.238	NaN	-81.491	-112.77	NaN	-113.41
0.12681	-90.217	NaN	-90.014	-72.237	NaN	-71.866	-104.83	NaN	-105.81	-81.234	NaN	-81.446	-112.71	NaN	-113.4
0.12731	-90.209	NaN	-89.922	-72.236	NaN	-71.861	-104.81	NaN	-105.65	-81.23	NaN	-81.471	-112.65	NaN	-113.34
0.1278	-90.2	NaN	-89.871	-72.235	NaN	-71.841	-104.78	NaN	-105.42	-81.226	NaN	-81.487	-112.59	NaN	-113.43
0.1283	-90.192	NaN	-89.734	-72.235	NaN	-71.746	-104.76	NaN	-105.32	-81.222	NaN	-81.51	-112.53	NaN	-113.45
0.1288	-90.183	NaN	-89.573	-72.234	NaN	-71.715	-104.74	NaN	-105.32	-81.218	NaN	-81.525	-112.47	NaN	-113.49
0.1293	-90.175	NaN	-89.499	-72.233	NaN	-71.624	-104.72	NaN	-105.41	-81.215	NaN	-81.561	-112.42	NaN	-113.45
0.1298	-90.167	NaN	-89.526	-72.232	NaN	-71.577	-104.7	NaN	-105.34	-81.211	NaN	-81.528	-112.36	NaN	-113.45
0.13029	-90.158	NaN	-89.566	-72.231	NaN	-71.606	-104.67	NaN	-104.98	-81.207	NaN	-81.536	-112.3	NaN	-113.28
0.13079	-90.15	NaN	-89.742	-72.231	NaN	-71.636	-104.65	NaN	-104.86	-81.203	NaN	-81.553	-112.24	NaN	-113.06
0.13129	-90.141	NaN	-89.79	-72.23	NaN	-71.662	-104.63	NaN	-104.86	-81.2	NaN	-81.528	-112.18	NaN	-113.03
0.13179	-90.133	NaN	-89.844	-72.229	NaN	-71.648	-104.61	NaN	-104.95	-81.196	NaN	-81.535	-112.12	NaN	-113.12
0.13229	-90.125	NaN	-89.857	-72.228	NaN	-71.622	-104.58	NaN	-105.01	-81.192	NaN	-81.391	-112.06	NaN	-113.27
0.13279	-90.116	NaN	-89.822	-72.227	NaN	-71.584	-104.56	NaN	-105.04	-81.188	NaN	-81.334	-112	NaN	-113.27
0.13328	-90.108	NaN	-89.783	-72.226	NaN	-71.556	-104.54	NaN	-105.13	-81.184	NaN	-81.277	-111.95	NaN	-113.17
0.13378	-90.1	NaN	-89.722	-72.226	NaN	-71.578	-104.52	NaN	-105.07	-81.181	NaN	-81.247	-111.89	NaN	-112.99
0.13428	-90.091	NaN	-89.561	-72.225	NaN	-71.62	-104.5	NaN	-105.02	-81.177	NaN	-81.276	-111.83	NaN	-112.75
0.13478	-90.083	NaN	-89.51	-72.224	NaN	-71.686	-104.48	NaN	-105.07	-81.173	NaN	-81.292	-111.77	NaN	-112.53
0.13528	-90.075	NaN	-89.546	-72.223	NaN	-71.694	-104.45	NaN	-104.96	-81.169	NaN	-81.371	-111.72	NaN	-112.01
0.13577	-90.066	NaN	-89.619	-72.222	NaN	-71.771	-104.43	NaN	-104.94	-81.166	NaN	-81.397	-111.66	NaN	-111.85
0.13627	-90.058	NaN	-89.621	-72.222	NaN	-71.824	-104.41	NaN	-105.04	-81.162	NaN	-81.48	-111.6	NaN	-111.75
0.13677	-90.05	NaN	-89.682	-72.221	NaN	-71.852	-104.39	NaN	-104.98	-81.158	NaN	-81.504	-111.55	NaN	-111.68
0.13727	-90.042	NaN	-89.683	-72.22	NaN	-71.884	-104.37	NaN	-104.76	-81.154	NaN	-81.502	-111.49	NaN	-111.51
0.13777	-90.033	NaN	-89.71	-72.219	NaN	-71.933	-104.34	NaN	-104.64	-81.151	NaN	-81.523	-111.43	NaN	-111.31
0.13827	-90.025	NaN	-89.728	-72.218	NaN	-72.039	-104.32	NaN	-104.58	-81.147	NaN	-81.494	-111.38	NaN	-111.01
0.13876	-90.017	NaN	-89.722	-72.218	NaN	-72.121	-104.3	NaN	-104.6	-81.143	NaN	-81.481	-111.32	NaN	-110.99
0.13926	-90.008	NaN	-89.714	-72.217	NaN	-72.168	-104.28	NaN	-104.57	-81.139	NaN	-81.389	-111.26	NaN	-110.99
0.13976	-90	NaN	-89.742	-72.216	NaN	-72.214	-104.26	NaN	-104.57	-81.136	NaN	-81.33	-111.21	NaN	-111.02
0.14026	-89.992	NaN	-89.759	-72.215	NaN	-72.256	-104.24	NaN	-104.42	-81.132	NaN	-81.253	-111.15	NaN	-111.02
0.14076	-89.984	NaN	-89.752	-72.214	NaN	-72.295	-104.21	NaN	-104.27	-81.128	NaN	-81.176	-111.1	NaN	-110.88
0.14125	-89.976	NaN	-89.773	-72.213	NaN	-72.33	-104.19	NaN	-104.25	-81.124	NaN	-81.146	-111.04	NaN	-110.73
0.14175	-89.967	NaN	-89.835	-72.213	NaN	-72.328	-104.17	NaN	-104.26	-81.121	NaN	-81.137	-110.99	NaN	-110.61
0.14225	-89.959	NaN	-89.839	-72.212	NaN	-72.308	-104.15	NaN	-104.14	-81.117	NaN	-81.095	-110.93	NaN	-110.52
0.14275	-89.951	NaN	-89.869	-72.211	NaN	-72.141	-104.13	NaN	-104.08	-81.113	NaN	-81.09	-110.88	NaN	-110.39
0.14325	-89.943	NaN	-89.867	-72.21	NaN	-72.119	-104.11	NaN	-104.08	-81.11	NaN	-81.13	-110.82	NaN	-110.26
0.14375	-89.934	NaN	-89.851	-72.209	NaN	-72.084	-104.09	NaN	-104.07	-81.106	NaN	-81.179	-110.77	NaN	-110.14
0.14424	-89.926	NaN	-89.796	-72.209	NaN	-71.929	-104.06	NaN	-104.06	-81.102	NaN	-81.203	-110.72	NaN	-110.08
0.14474	-89.918	NaN	-89.828	-72.208	NaN	-71.873	-104.04	NaN	-104.17	-81.098	NaN	-81.273	-110.66	NaN	-109.98
0.14524	-89.91	NaN	-89.806	-72.207	NaN	-71.869	-104.02	NaN	-104.15	-81.095	NaN	-81.311	-110.61	NaN	-109.86
0.14574	-89.902	NaN	-89.951	-72.206	NaN	-71.865	-104	NaN	-103.98	-81.091	NaN	-81.326	-110.55	NaN	-109.77
0.14624	-89.894	NaN	-89.931	-72.205	NaN	-71.903	-103.98	NaN	-103.67	-81.087	NaN	-81.289	-110.5	NaN	-109.74
0.14673	-89.886	NaN	-89.988	-72.204	NaN	-71.894	-103.96	NaN	-103.37	-81.084	NaN	-81.289	-110.45	NaN	-109.64
0.14723	-89.877	NaN	-89.942	-72.204	NaN	-71.835	-103.94	NaN	-103.08	-81.08	NaN	-81.275	-110.39	NaN	-109.4
0.14773	-89.869	NaN	-89.908	-72.203	NaN	-71.76	-103.92	NaN	-102.92	-81.076	NaN	-81.28	-110.34	NaN	-109.39
0.14823	-89.861	NaN	-89.86	-72.202	NaN	-71.658	-103.89	NaN	-102.86	-81.072	NaN	-81.288	-110.29	NaN	-109.32
0.14873	-89.853	NaN	-89.866	-72.201	NaN	-71.601	-103.87	NaN	-102.84	-81.069	NaN	-81.341	-110.24	NaN	-109.29
0.14923	-89.845	NaN	-89.87	-72.2	NaN	-71.595	-103.85	NaN	-102.93	-81.065	NaN	-81.352	-110.18	NaN	-109.23
0.14972	-89.837	NaN	-89.87	-72.2	NaN	-71.656	-103.83	NaN	-102.97	-81.061	NaN	-81.37	-110.13	NaN	-109.11
0.15022	-89.829	NaN	-89.924	-72.199	NaN	-71.674	-103.81	NaN	-102.97	-81.058	NaN	-81.394	-110.08	NaN	-108.94
0.15072	-89.821	NaN	-89.912	-72.198	NaN	-71.648	-103.79	NaN	-102.97	-81.054	NaN	-81.398	-110.03	NaN	-108.79
0.15122	-89.813	NaN	-89.783	-72.197	NaN	-71.603	-103.77	NaN	-103	-81.05	NaN	-81.339	-109.98	NaN	-108.77
0.15172	-89.804	NaN	-89.658	-72.196	NaN	-71.629	-103.75	NaN	-102.97	-81.047	NaN	-81.327	-109.92	NaN	-108.72
0.15221	-89.796	NaN	-89.55	-72.196	NaN	-71.634	-103.73	NaN	-102.96	-81.043	NaN	-81.33	-109.87	NaN	-108.7
0.15271	-89.788	NaN	-89.553	-72.195	NaN	-71.634	-103.71	NaN	-102.9	-81.039	NaN	-81.344	-109.82	NaN	-108.58
0.15321	-89.78	NaN	-89.598	-72.194	NaN	-71.658	-103.68	NaN	-103.06	-81.036	NaN	-81.382	-109.77	NaN	-108.53
0.15371	-89.772	NaN	-89.632	-72.193	NaN	-71.629	-103.66	NaN	-102.9	-81.032	NaN	-81.401	-109.72	NaN	-108.53
0.15421	-89.764	NaN	-89.59	-72.192	NaN	-71.624	-103.64	NaN	-102.91	-81.028	NaN	-81.382	-109.67	NaN	-108.63
0.15471	-89.756	NaN	-89.517	-72.192	NaN	-71.606	-103.62	NaN	-103	-81.025	NaN	-81.386	-109.62	NaN	-108.72
0.1552	-89.748	NaN	-89.37	-72.191	NaN	-71.597	-103.6	NaN	-102.9	-81.021	NaN	-81.413	-109.57	NaN	-108.72
0.1557	-89.74	NaN	-89.282	-72.19	NaN	-71.594	-103.58	NaN	-102.82	-81.017	NaN	-81.417	-109.52	NaN	-108.68
0.1562	-89.732	NaN	-89.258	-72.189	NaN	-71.588	-103.56	NaN	-102.81	-81.014	NaN	-81.414	-109.47	NaN	-108.52
0.1567	-89.724	NaN	-89.284	-72.188	NaN	-71.583	-103.54	NaN	-102.68	-81.01	NaN	-81.361	-109.42	NaN	-108.43
0.1572	-89.716	NaN	-89.362	-72.187	NaN	-71.558	-103.52	NaN	-102.6	-81.006	NaN	-81.368	-109.37	NaN	-108.16
0.15769	-89.708	NaN	-89.467	-72.187	NaN	-71.598	-103.5	NaN	-102.46	-81.003	NaN	-81.375	-109.32	NaN	-107.92
0.15819	-89.7	NaN	-89.488	-72.186	NaN	-71.616	-103.48	NaN	-102.38	-80.999	NaN	-81.35	-109.27	NaN	-107.89
0.15869	-89.692	NaN	-89.529	-72.185	NaN	-71.648	-103.46	NaN	-102.2	-80.995	NaN	-81.297	-109.22	NaN	-107.89
0.15919	-89.684	NaN	-89.529	-72.184	NaN	-71.659	-103.44	NaN	-102.1	-80.992	NaN	-81.273	-109.17	NaN	-107.9
0.15969	-89.676	NaN	-89.52	-72.183	NaN	-71.692	-103.42	NaN	-102.07	-80.988	NaN	-81.234	-109.12	NaN	-107.88
0.16019	-89.668	NaN	-89.518	-72.183	NaN	-71.697	-103.39	NaN	-102.11	-80.985	NaN	-81.163	-109.07	NaN	-107.88
0.16068	-89.66	NaN	-89.6	-72.182	NaN	-71.704	-103.37	NaN	-102.1	-80.981	NaN	-81.078	-109.02	NaN	-107.84
0.16118	-89.652	NaN	-89.551	-72.181	NaN	-71.727	-103.35	NaN	-102.17	-80.977	NaN	-81.039	-108.97	NaN	-107.74
0.16168	-89.644	NaN	-89.548	-72.18	NaN	-71.699	-103.33	NaN	-102.2	-80.974	NaN	-81.024	-108.92	NaN	-107.57
0.16218	-89.637	NaN	-89.537	-72.179	NaN	-71.717	-103.31	NaN	-102.21	-80.97	NaN	-81.015	-108.88	NaN	-107.42
0.16268	-89.629	NaN	-89.506	-72.179	NaN	-71.734	-103.29	NaN	-102.29	-80.966	NaN	-81.024	-108.83	NaN	-107.4
0.16317	-89.621	NaN	-89.393	-72.178	NaN	-71.741	-103.27	NaN	-102.32	-80.963	NaN	-81.037	-108.78	NaN	-107.41
0.16367	-89.613	NaN	-89.373	-72.177	NaN	-71.743	-103.25	NaN	-102.37	-80.959	NaN	-81.073	-108.73	NaN	-107.47
0.16417	-89.605	NaN	-89.375	-72.176	NaN	-71.777	-103.23	NaN	-102.43	-80.956	NaN	-81.065	-108.68	NaN	-107.57
0.16467	-89.597	NaN	-89.354	-72.175	NaN	-71.826	-103.21	NaN	-102.46	-80.952	NaN	-81.054	-108.64	NaN	-107.49
0.16517	-89.589	NaN	-89.321	-72.175	NaN	-71.85	-103.19	NaN	-102.45	-80.948	NaN	-81.021	-108.59	NaN	-107.37
0.16567	-89.581	NaN	-89.279	-72.174	NaN	-71.852	-103.17	NaN	-102.41	-80.945	NaN	-81.052	-108.54	NaN	-107.32
0.16616	-89.573	NaN	-89.268	-72.173	NaN	-71.814	-103.15	NaN	-102.39	-80.941	NaN	-81.089	-108.49	NaN	-107.21
0.16666	-89.566	NaN	-89.282	-72.172	NaN	-71.675	-103.13	NaN	-102.36	-80.937	NaN	-81.122	-108.45	NaN	-106.99
0.16716	-89.558	NaN	-89.291	-72.171	NaN	-71.651	-103.11	NaN	-102.34	-80.934	NaN	-81.129	-108.4	NaN	-106.86
0.16766	-89.55	NaN	-89.322	-72.171	NaN	-71.693	-103.09	NaN	-102.47	-80.93	NaN	-81.14	-108.35	NaN	-106.78
0.16816	-89.542	NaN	-89.428	-72.17	NaN	-71.741	-103.07	NaN	-102.54	-80.927	NaN	-81.141	-108.31	NaN	-106.67
0.16865	-89.534	NaN	-89.482	-72.169	NaN	-71.796	-103.05	NaN	-102.68	-80.923	NaN	-81.124	-108.26	NaN	-106.57
0.16915	-89.526	NaN	-89.503	-72.168	NaN	-71.835	-103.03	NaN	-102.79	-80.92	NaN	-81.122	-108.21	NaN	-106.39
0.16965	-89.519	NaN	-89.476	-72.167	NaN	-71.866	-103.01	NaN	-102.76	-80.916	NaN	-81.2	-108.17	NaN	-106.23
0.17015	-89.511	NaN	-89.451	-72.167	NaN	-71.863	-102.99	NaN	-102.79	-80.912	NaN	-81.247	-108.12	NaN	-106.12
0.17065	-89.503	NaN	-89.412	-72.166	NaN	-71.825	-102.97	NaN	-102.7	-80.909	NaN	-81.281	-108.08	NaN	-106
0.17115	-89.495	NaN	-89.405	-72.165	NaN	-71.793	-102.95	NaN	-102.68	-80.905	NaN	-81.272	-108.03	NaN	-105.78
0.17164	-89.487	NaN	-89.408	-72.164	NaN	-71.807	-102.93	NaN	-102.57	-80.902	NaN	-81.254	-107.98	NaN	-105.74
0.17214	-89.48	NaN	-89.443	-72.163	NaN	-71.819	-102.91	NaN	-102.57	-80.898	NaN	-81.216	-107.94	NaN	-105.78
0.17264	-89.472	NaN	-89.54	-72.162	NaN	-71.881	-102.89	NaN	-102.46	-80.894	NaN	-81.198	-107.89	NaN	-105.68
0.17314	-89.464	NaN	-89.62	-72.162	NaN	-71.912	-102.87	NaN	-102.34	-80.891	NaN	-81.201	-107.85	NaN	-105.52
0.17364	-89.456	NaN	-89.624	-72.161	NaN	-71.921	-102.85	NaN	-102.25	-80.887	NaN	-81.215	-107.8	NaN	-105.62
0.17413	-89.448	NaN	-89.683	-72.16	NaN	-71.893	-102.83	NaN	-102.23	-80.884	NaN	-81.228	-107.76	NaN	-105.69
0.17463	-89.441	NaN	-89.625	-72.159	NaN	-71.863	-102.81	NaN	-102.22	-80.88	NaN	-81.211	-107.71	NaN	-105.58
0.17513	-89.433	NaN	-89.539	-72.158	NaN	-71.854	-102.79	NaN	-102.25	-80.877	NaN	-81.221	-107.67	NaN	-105.62
0.17563	-89.425	NaN	-89.446	-72.158	NaN	-71.822	-102.77	NaN	-102.27	-80.873	NaN	-81.141	-107.62	NaN	-105.56
0.17613	-89.418	NaN	-89.328	-72.157	NaN	-71.857	-102.75	NaN	-102.25	-80.87	NaN	-81.072	-107.58	NaN	-105.46
0.17663	-89.41	NaN	-89.22	-72.156	NaN	-71.861	-102.73	NaN	-102.24	-80.866	NaN	-81.024	-107.54	NaN	-105.29
0.17712	-89.402	NaN	-89.161	-72.155	NaN	-71.831	-102.71	NaN	-102.18	-80.862	NaN	-81.005	-107.49	NaN	-105.23
0.17762	-89.394	NaN	-89.024	-72.154	NaN	-71.796	-102.69	NaN	-102.14	-80.859	NaN	-80.998	-107.45	NaN	-105.14
0.17812	-89.387	NaN	-88.793	-72.154	NaN	-71.828	-102.67	NaN	-102.16	-80.855	NaN	-80.995	-107.4	NaN	-105.24
0.17862	-89.379	NaN	-88.753	-72.153	NaN	-71.823	-102.65	NaN	-102.17	-80.852	NaN	-81.023	-107.36	NaN	-105.33
0.17912	-89.371	NaN	-88.748	-72.152	NaN	-71.841	-102.63	NaN	-102.33	-80.848	NaN	-81.008	-107.32	NaN	-105.34
0.17961	-89.364	NaN	-88.768	-72.151	NaN	-71.863	-102.61	NaN	-102.35	-80.845	NaN	-80.966	-107.27	NaN	-105.35
0.18011	-89.356	NaN	-88.785	-72.15	NaN	-71.926	-102.59	NaN	-102.39	-80.841	NaN	-80.96	-107.23	NaN	-105.33
0.18061	-89.348	NaN	-88.798	-72.15	NaN	-71.965	-102.58	NaN	-102.37	-80.838	NaN	-80.957	-107.19	NaN	-105.26
0.18111	-89.341	NaN	-88.834	-72.149	NaN	-71.994	-102.56	NaN	-102.3	-80.834	NaN	-80.941	-107.14	NaN	-105.21
0.18161	-89.333	NaN	-88.837	-72.148	NaN	-72.007	-102.54	NaN	-102.24	-80.831	NaN	-80.945	-107.1	NaN	-104.74
0.18211	-89.325	NaN	-88.813	-72.147	NaN	-72.012	-102.52	NaN	-102.25	-80.827	NaN	-80.98	-107.06	NaN	-104.62
0.1826	-89.318	NaN	-88.834	-72.146	NaN	-72.044	-102.5	NaN	-102.22	-80.824	NaN	-81.004	-107.02	NaN	-104.6
0.1831	-89.31	NaN	-88.85	-72.146	NaN	-72.02	-102.48	NaN	-102.18	-80.82	NaN	-81.027	-106.97	NaN	-104.58
0.1836	-89.302	NaN	-88.882	-72.145	NaN	-72.021	-102.46	NaN	-102.18	-80.817	NaN	-81.031	-106.93	NaN	-104.58
0.1841	-89.295	NaN	-88.929	-72.144	NaN	-72.065	-102.44	NaN	-102.14	-80.813	NaN	-81.044	-106.89	NaN	-104.67
0.1846	-89.287	NaN	-88.883	-72.143	NaN	-72.102	-102.42	NaN	-102.08	-80.809	NaN	-81.071	-106.85	NaN	-104.67
0.18509	-89.28	NaN	-88.869	-72.142	NaN	-72.147	-102.4	NaN	-102.12	-80.806	NaN	-81.049	-106.8	NaN	-104.61
0.18559	-89.272	NaN	-88.84	-72.142	NaN	-72.178	-102.38	NaN	-102.1	-80.802	NaN	-81.057	-106.76	NaN	-104.66
0.18609	-89.264	NaN	-88.788	-72.141	NaN	-72.163	-102.36	NaN	-101.93	-80.799	NaN	-81.065	-106.72	NaN	-104.67
0.18659	-89.257	NaN	-88.753	-72.14	NaN	-72.196	-102.34	NaN	-102	-80.795	NaN	-81.068	-106.68	NaN	-104.55
0.18709	-89.249	NaN	-88.767	-72.139	NaN	-72.254	-102.32	NaN	-101.92	-80.792	NaN	-81.1	-106.64	NaN	-104.46
0.18759	-89.242	NaN	-88.834	-72.138	NaN	-72.283	-102.3	NaN	-101.82	-80.788	NaN	-81.101	-106.6	NaN	-104.31
0.18808	-89.234	NaN	-88.924	-72.138	NaN	-72.314	-102.29	NaN	-101.79	-80.785	NaN	-81.068	-106.56	NaN	-104.24
0.18858	-89.227	NaN	-89.033	-72.137	NaN	-72.37	-102.27	NaN	-101.86	-80.781	NaN	-81.053	-106.51	NaN	-104.13
0.18908	-89.219	NaN	-89.077	-72.136	NaN	-72.402	-102.25	NaN	-101.77	-80.778	NaN	-81.027	-106.47	NaN	-104.13
0.18958	-89.211	NaN	-89.118	-72.135	NaN	-72.396	-102.23	NaN	-101.71	-80.775	NaN	-81.001	-106.43	NaN	-104.19
0.19008	-89.204	NaN	-89.116	-72.134	NaN	-72.396	-102.21	NaN	-101.75	-80.771	NaN	-81.026	-106.39	NaN	-104.37
0.19057	-89.196	NaN	-89.091	-72.134	NaN	-72.381	-102.19	NaN	-101.75	-80.768	NaN	-81.047	-106.35	NaN	-104.45
0.19107	-89.189	NaN	-89.137	-72.133	NaN	-72.333	-102.17	NaN	-101.68	-80.764	NaN	-81.056	-106.31	NaN	-104.59
0.19157	-89.181	NaN	-89.147	-72.132	NaN	-72.299	-102.15	NaN	-101.72	-80.761	NaN	-81.079	-106.27	NaN	-104.46
0.19207	-89.174	NaN	-89.186	-72.131	NaN	-72.253	-102.13	NaN	-101.77	-80.757	NaN	-81.087	-106.23	NaN	-104.36
0.19257	-89.166	NaN	-89.216	-72.13	NaN	-72.23	-102.11	NaN	-101.79	-80.754	NaN	-81.058	-106.19	NaN	-104.34
0.19307	-89.159	NaN	-89.264	-72.13	NaN	-72.169	-102.1	NaN	-101.97	-80.75	NaN	-81.038	-106.15	NaN	-104.31
0.19356	-89.151	NaN	-89.279	-72.129	NaN	-72.159	-102.08	NaN	-102.06	-80.747	NaN	-81.047	-106.11	NaN	-104.24
0.19406	-89.144	NaN	-89.315	-72.128	NaN	-72.098	-102.06	NaN	-102.06	-80.743	NaN	-81.023	-106.07	NaN	-104.09
0.19456	-89.136	NaN	-89.288	-72.127	NaN	-72.102	-102.04	NaN	-102.07	-80.74	NaN	-81.04	-106.03	NaN	-104.05
0.19506	-89.129	NaN	-89.296	-72.126	NaN	-72.143	-102.02	NaN	-102.05	-80.736	NaN	-81.033	-105.99	NaN	-104.01
0.19556	-89.121	NaN	-89.313	-72.126	NaN	-72.16	-102	NaN	-102.01	-80.733	NaN	-81.038	-105.95	NaN	-103.96
0.19605	-89.114	NaN	-89.397	-72.125	NaN	-72.175	-101.98	NaN	-102	-80.729	NaN	-81.104	-105.91	NaN	-104.06
0.19655	-89.106	NaN	-89.487	-72.124	NaN	-72.237	-101.96	NaN	-102.01	-80.726	NaN	-81.081	-105.88	NaN	-104.08
0.19705	-89.099	NaN	-89.532	-72.123	NaN	-72.289	-101.95	NaN	-101.93	-80.722	NaN	-81.051	-105.84	NaN	-104.08
0.19755	-89.092	NaN	-89.522	-72.123	NaN	-72.291	-101.93	NaN	-101.75	-80.719	NaN	-81.067	-105.8	NaN	-104.07
0.19805	-89.084	NaN	-89.4	-72.122	NaN	-72.299	-101.91	NaN	-101.49	-80.716	NaN	-81.09	-105.76	NaN	-104.09
0.19855	-89.077	NaN	-89.284	-72.121	NaN	-72.316	-101.89	NaN	-101.29	-80.712	NaN	-81.044	-105.72	NaN	-104.11
0.19904	-89.069	NaN	-89.207	-72.12	NaN	-72.355	-101.87	NaN	-101.05	-80.709	NaN	-81.072	-105.68	NaN	-104.35
0.19954	-89.062	NaN	-89.18	-72.119	NaN	-72.35	-101.85	NaN	-100.87	-80.705	NaN	-81.045	-105.64	NaN	-104.59
0.20004	-89.054	NaN	-89.159	-72.119	NaN	-72.368	-101.83	NaN	-100.75	-80.702	NaN	-81.034	-105.61	NaN	-104.63
0.20054	-89.047	NaN	-89.191	-72.118	NaN	-72.379	-101.82	NaN	-100.76	-80.698	NaN	-81.018	-105.57	NaN	-104.61
0.20104	-89.04	NaN	-89.199	-72.117	NaN	-72.357	-101.8	NaN	-100.8	-80.695	NaN	-81.028	-105.53	NaN	-104.55
0.20153	-89.032	NaN	-89.262	-72.116	NaN	-72.313	-101.78	NaN	-100.88	-80.692	NaN	-80.989	-105.49	NaN	-104.46
0.20203	-89.025	NaN	-89.261	-72.115	NaN	-72.272	-101.76	NaN	-101.03	-80.688	NaN	-80.997	-105.45	NaN	-104.4
0.20253	-89.018	NaN	-89.281	-72.115	NaN	-72.305	-101.74	NaN	-101.1	-80.685	NaN	-80.98	-105.42	NaN	-104.31
0.20303	-89.01	NaN	-89.283	-72.114	NaN	-72.307	-101.72	NaN	-101.15	-80.681	NaN	-80.995	-105.38	NaN	-104.3
0.20353	-89.003	NaN	-89.281	-72.113	NaN	-72.259	-101.7	NaN	-101.12	-80.678	NaN	-80.97	-105.34	NaN	-104.21
0.20403	-88.995	NaN	-89.338	-72.112	NaN	-72.227	-101.69	NaN	-101.14	-80.674	NaN	-81.002	-105.3	NaN	-104.27
0.20452	-88.988	NaN	-89.373	-72.111	NaN	-72.164	-101.67	NaN	-101.22	-80.671	NaN	-81.008	-105.27	NaN	-104.14
0.20502	-88.981	NaN	-89.369	-72.111	NaN	-72.083	-101.65	NaN	-101.23	-80.668	NaN	-81.001	-105.23	NaN	-104.12
0.20552	-88.973	NaN	-89.287	-72.11	NaN	-72.082	-101.63	NaN	-101.23	-80.664	NaN	-80.973	-105.19	NaN	-104.11
0.20602	-88.966	NaN	-89.256	-72.109	NaN	-72.074	-101.61	NaN	-101.4	-80.661	NaN	-80.953	-105.16	NaN	-104.15
0.20652	-88.959	NaN	-89.134	-72.108	NaN	-72.073	-101.59	NaN	-101.45	-80.657	NaN	-80.936	-105.12	NaN	-104.13
0.20701	-88.951	NaN	-89.036	-72.107	NaN	-72.067	-101.58	NaN	-101.46	-80.654	NaN	-80.959	-105.08	NaN	-104.19
0.20751	-88.944	NaN	-89.014	-72.107	NaN	-72.065	-101.56	NaN	-101.44	-80.651	NaN	-80.951	-105.05	NaN	-104.21
0.20801	-88.937	NaN	-88.978	-72.106	NaN	-72.094	-101.54	NaN	-101.5	-80.647	NaN	-80.952	-105.01	NaN	-104.14
0.20851	-88.93	NaN	-88.946	-72.105	NaN	-72.115	-101.52	NaN	-101.5	-80.644	NaN	-80.97	-104.97	NaN	-104.14
0.20901	-88.922	NaN	-88.923	-72.104	NaN	-72.15	-101.5	NaN	-101.46	-80.64	NaN	-80.972	-104.94	NaN	-104.19
0.20951	-88.915	NaN	-88.792	-72.103	NaN	-72.116	-101.49	NaN	-101.48	-80.637	NaN	-80.927	-104.9	NaN	-104.18
0.21	-88.908	NaN	-88.746	-72.103	NaN	-72.096	-101.47	NaN	-101.51	-80.634	NaN	-80.891	-104.87	NaN	-104.18
0.2105	-88.9	NaN	-88.737	-72.102	NaN	-72.072	-101.45	NaN	-101.56	-80.63	NaN	-80.909	-104.83	NaN	-104.07
0.211	-88.893	NaN	-88.773	-72.101	NaN	-71.996	-101.43	NaN	-101.57	-80.627	NaN	-80.822	-104.79	NaN	-104.12
0.2115	-88.886	NaN	-88.784	-72.1	NaN	-71.965	-101.41	NaN	-101.49	-80.623	NaN	-80.765	-104.76	NaN	-104.19
0.212	-88.879	NaN	-88.879	-72.1	NaN	-71.966	-101.4	NaN	-101.47	-80.62	NaN	-80.706	-104.72	NaN	-104.13
0.21249	-88.871	NaN	-88.879	-72.099	NaN	-71.963	-101.38	NaN	-101.38	-80.617	NaN	-80.71	-104.69	NaN	-103.72
0.21299	-88.864	NaN	-88.879	-72.098	NaN	-71.981	-101.36	NaN	-101.35	-80.613	NaN	-80.684	-104.65	NaN	-103.72
0.21349	-88.857	NaN	-88.879	-72.097	NaN	-72.034	-101.34	NaN	-101.31	-80.61	NaN	-80.683	-104.62	NaN	-103.78
0.21399	-88.85	NaN	-88.92	-72.096	NaN	-72.131	-101.32	NaN	-101.32	-80.607	NaN	-80.615	-104.58	NaN	-103.76
0.21449	-88.843	NaN	-88.963	-72.096	NaN	-72.206	-101.31	NaN	-101.32	-80.603	NaN	-80.522	-104.55	NaN	-103.68
0.21499	-88.835	NaN	-88.991	-72.095	NaN	-72.272	-101.29	NaN	-101.31	-80.6	NaN	-80.471	-104.51	NaN	-103.62
0.21548	-88.828	NaN	-88.969	-72.094	NaN	-72.31	-101.27	NaN	-101.3	-80.596	NaN	-80.421	-104.48	NaN	-103.56
0.21598	-88.821	NaN	-89.008	-72.093	NaN	-72.344	-101.25	NaN	-101.27	-80.593	NaN	-80.426	-104.44	NaN	-103.55
0.21648	-88.814	NaN	-89.038	-72.092	NaN	-72.388	-101.23	NaN	-101.23	-80.59	NaN	-80.424	-104.41	NaN	-103.5
0.21698	-88.807	NaN	-89.061	-72.092	NaN	-72.404	-101.22	NaN	-101.17	-80.586	NaN	-80.486	-104.38	NaN	-103.57
0.21748	-88.799	NaN	-89.131	-72.091	NaN	-72.406	-101.2	NaN	-101.06	-80.583	NaN	-80.493	-104.34	NaN	-103.41
0.21797	-88.792	NaN	-89.21	-72.09	NaN	-72.388	-101.18	NaN	-101.04	-80.58	NaN	-80.534	-104.31	NaN	-103.23
0.21847	-88.785	NaN	-89.22	-72.089	NaN	-72.372	-101.16	NaN	-101.09	-80.576	NaN	-80.58	-104.27	NaN	-103.14
0.21897	-88.778	NaN	-89.22	-72.088	NaN	-72.372	-101.15	NaN	-101.17	-80.573	NaN	-80.579	-104.24	NaN	-103.01
0.21947	-88.771	NaN	-89.176	-72.088	NaN	-72.388	-101.13	NaN	-101.28	-80.57	NaN	-80.532	-104.21	NaN	-102.92
0.21997	-88.764	NaN	-89.143	-72.087	NaN	-72.401	-101.11	NaN	-101.35	-80.566	NaN	-80.501	-104.17	NaN	-102.87
0.22047	-88.756	NaN	-89.07	-72.086	NaN	-72.41	-101.09	NaN	-101.4	-80.563	NaN	-80.326	-104.14	NaN	-102.95
0.22096	-88.749	NaN	-89.008	-72.085	NaN	-72.427	-101.08	NaN	-101.29	-80.56	NaN	-80.31	-104.1	NaN	-102.95
0.22146	-88.742	NaN	-89.014	-72.085	NaN	-72.417	-101.06	NaN	-101.29	-80.556	NaN	-80.346	-104.07	NaN	-103
0.22196	-88.735	NaN	-89.056	-72.084	NaN	-72.412	-101.04	NaN	-101.31	-80.553	NaN	-80.374	-104.04	NaN	-103.13
0.22246	-88.728	NaN	-89.065	-72.083	NaN	-72.425	-101.02	NaN	-101.27	-80.55	NaN	-80.387	-104	NaN	-103.16
0.22296	-88.721	NaN	-89.175	-72.082	NaN	-72.443	-101.01	NaN	-101.26	-80.546	NaN	-80.345	-103.97	NaN	-103.18
0.22345	-88.714	NaN	-89.288	-72.081	NaN	-72.438	-100.99	NaN	-101.3	-80.543	NaN	-80.301	-103.94	NaN	-103.29
0.22395	-88.707	NaN	-89.291	-72.081	NaN	-72.401	-100.97	NaN	-101.3	-80.54	NaN	-80.31	-103.91	NaN	-103.29
0.22445	-88.7	NaN	-89.304	-72.08	NaN	-72.257	-100.95	NaN	-101.25	-80.536	NaN	-80.329	-103.87	NaN	-103.31
0.22495	-88.692	NaN	-89.304	-72.079	NaN	-72.135	-100.94	NaN	-101.19	-80.533	NaN	-80.346	-103.84	NaN	-103.41
0.22545	-88.685	NaN	-89.248	-72.078	NaN	-72.128	-100.92	NaN	-101.19	-80.53	NaN	-80.352	-103.81	NaN	-103.29
0.22595	-88.678	NaN	-89.201	-72.077	NaN	-72.136	-100.9	NaN	-101.17	-80.526	NaN	-80.396	-103.78	NaN	-103.15
0.22644	-88.671	NaN	-89.204	-72.077	NaN	-72.143	-100.88	NaN	-101.09	-80.523	NaN	-80.412	-103.74	NaN	-103
0.22694	-88.664	NaN	-89.166	-72.076	NaN	-72.191	-100.87	NaN	-100.98	-80.52	NaN	-80.449	-103.71	NaN	-102.77
0.22744	-88.657	NaN	-89.162	-72.075	NaN	-72.195	-100.85	NaN	-100.85	-80.516	NaN	-80.431	-103.68	NaN	-102.67
0.22794	-88.65	NaN	-89.213	-72.074	NaN	-72.193	-100.83	NaN	-100.56	-80.513	NaN	-80.442	-103.65	NaN	-102.61
0.22844	-88.643	NaN	-89.292	-72.074	NaN	-72.182	-100.81	NaN	-100.4	-80.51	NaN	-80.442	-103.61	NaN	-102.58
0.22893	-88.636	NaN	-89.317	-72.073	NaN	-72.163	-100.8	NaN	-100.4	-80.506	NaN	-80.448	-103.58	NaN	-102.7
0.22943	-88.629	NaN	-89.342	-72.072	NaN	-72.137	-100.78	NaN	-100.33	-80.503	NaN	-80.475	-103.55	NaN	-102.84
0.22993	-88.622	NaN	-89.404	-72.071	NaN	-72.117	-100.76	NaN	-100.31	-80.5	NaN	-80.5	-103.52	NaN	-102.94
0.23043	-88.615	NaN	-89.481	-72.07	NaN	-72.096	-100.74	NaN	-100.38	-80.497	NaN	-80.521	-103.49	NaN	-102.97
0.23093	-88.608	NaN	-89.508	-72.07	NaN	-72.084	-100.73	NaN	-100.37	-80.493	NaN	-80.549	-103.46	NaN	-102.94
0.23143	-88.601	NaN	-89.512	-72.069	NaN	-72.086	-100.71	NaN	-100.33	-80.49	NaN	-80.583	-103.42	NaN	-102.82
0.23192	-88.594	NaN	-89.447	-72.068	NaN	-72.127	-100.69	NaN	-100.26	-80.487	NaN	-80.578	-103.39	NaN	-102.74
0.23242	-88.587	NaN	-89.304	-72.067	NaN	-72.144	-100.68	NaN	-100.15	-80.483	NaN	-80.571	-103.36	NaN	-102.71
0.23292	-88.58	NaN	-89.134	-72.066	NaN	-72.187	-100.66	NaN	-100.08	-80.48	NaN	-80.555	-103.33	NaN	-102.74
0.23342	-88.573	NaN	-89.056	-72.066	NaN	-72.182	-100.64	NaN	-99.986	-80.477	NaN	-80.539	-103.3	NaN	-102.74
0.23392	-88.566	NaN	-89.019	-72.065	NaN	-72.211	-100.63	NaN	-99.948	-80.474	NaN	-80.522	-103.27	NaN	-102.82
0.23441	-88.559	NaN	-88.955	-72.064	NaN	-72.214	-100.61	NaN	-99.885	-80.47	NaN	-80.494	-103.24	NaN	-102.9
0.23491	-88.552	NaN	-88.929	-72.063	NaN	-72.229	-100.59	NaN	-99.914	-80.467	NaN	-80.467	-103.21	NaN	-102.94
0.23541	-88.545	NaN	-88.886	-72.063	NaN	-72.25	-100.57	NaN	-99.934	-80.464	NaN	-80.463	-103.18	NaN	-102.94
0.23591	-88.538	NaN	-88.861	-72.062	NaN	-72.24	-100.56	NaN	-99.945	-80.46	NaN	-80.477	-103.15	NaN	-102.94
0.23641	-88.531	NaN	-88.833	-72.061	NaN	-72.221	-100.54	NaN	-100.05	-80.457	NaN	-80.502	-103.12	NaN	-102.87
0.23691	-88.524	NaN	-88.871	-72.06	NaN	-72.199	-100.52	NaN	-100.06	-80.454	NaN	-80.531	-103.09	NaN	-102.88
0.2374	-88.517	NaN	-88.872	-72.059	NaN	-72.205	-100.51	NaN	-100.03	-80.451	NaN	-80.544	-103.06	NaN	-102.99
0.2379	-88.51	NaN	-88.877	-72.059	NaN	-72.184	-100.49	NaN	-100.01	-80.447	NaN	-80.549	-103.03	NaN	-102.86
0.2384	-88.504	NaN	-88.888	-72.058	NaN	-72.149	-100.47	NaN	-99.987	-80.444	NaN	-80.499	-103	NaN	-102.91
0.2389	-88.497	NaN	-88.902	-72.057	NaN	-72.144	-100.46	NaN	-99.94	-80.441	NaN	-80.45	-102.97	NaN	-102.84
0.2394	-88.49	NaN	-88.97	-72.056	NaN	-72.12	-100.44	NaN	-99.935	-80.438	NaN	-80.433	-102.94	NaN	-102.57
0.23989	-88.483	NaN	-89	-72.056	NaN	-72.043	-100.42	NaN	-99.932	-80.434	NaN	-80.439	-102.91	NaN	-102.04
0.24039	-88.476	NaN	-89.002	-72.055	NaN	-71.964	-100.41	NaN	-99.855	-80.431	NaN	-80.484	-102.88	NaN	-101.69
0.24089	-88.469	NaN	-89.019	-72.054	NaN	-71.908	-100.39	NaN	-99.853	-80.428	NaN	-80.53	-102.85	NaN	-101.68
0.24139	-88.462	NaN	-89.006	-72.053	NaN	-71.873	-100.37	NaN	-99.832	-80.425	NaN	-80.553	-102.82	NaN	-101.55
0.24189	-88.455	NaN	-88.944	-72.052	NaN	-71.864	-100.36	NaN	-99.792	-80.421	NaN	-80.594	-102.79	NaN	-101.48
0.24239	-88.448	NaN	-88.908	-72.052	NaN	-71.909	-100.34	NaN	-99.746	-80.418	NaN	-80.473	-102.76	NaN	-101.66
0.24288	-88.442	NaN	-88.82	-72.051	NaN	-71.954	-100.32	NaN	-99.766	-80.415	NaN	-80.405	-102.73	NaN	-101.74
0.24338	-88.435	NaN	-88.762	-72.05	NaN	-71.985	-100.31	NaN	-99.761	-80.412	NaN	-80.375	-102.7	NaN	-101.76
0.24388	-88.428	NaN	-88.773	-72.049	NaN	-72.027	-100.29	NaN	-99.769	-80.408	NaN	-80.36	-102.67	NaN	-101.86
0.24438	-88.421	NaN	-88.811	-72.049	NaN	-72.031	-100.27	NaN	-99.798	-80.405	NaN	-80.378	-102.64	NaN	-101.94
0.24488	-88.414	NaN	-88.822	-72.048	NaN	-72.038	-100.26	NaN	-99.906	-80.402	NaN	-80.406	-102.61	NaN	-101.94
0.24537	-88.407	NaN	-88.831	-72.047	NaN	-71.994	-100.24	NaN	-99.948	-80.399	NaN	-80.409	-102.58	NaN	-101.96
0.24587	-88.401	NaN	-88.821	-72.046	NaN	-71.973	-100.22	NaN	-99.995	-80.396	NaN	-80.378	-102.56	NaN	-101.94
0.24637	-88.394	NaN	-88.767	-72.045	NaN	-71.94	-100.21	NaN	-99.972	-80.392	NaN	-80.4	-102.53	NaN	-101.91
0.24687	-88.387	NaN	-88.73	-72.045	NaN	-71.936	-100.19	NaN	-99.938	-80.389	NaN	-80.377	-102.5	NaN	-101.85
0.24737	-88.38	NaN	-88.729	-72.044	NaN	-71.916	-100.17	NaN	-99.914	-80.386	NaN	-80.407	-102.47	NaN	-101.83
0.24787	-88.373	NaN	-88.759	-72.043	NaN	-71.924	-100.16	NaN	-99.847	-80.383	NaN	-80.359	-102.44	NaN	-101.85
0.24836	-88.367	NaN	-88.778	-72.042	NaN	-71.949	-100.14	NaN	-99.74	-80.379	NaN	-80.371	-102.41	NaN	-101.79
0.24886	-88.36	NaN	-88.823	-72.042	NaN	-71.957	-100.12	NaN	-99.673	-80.376	NaN	-80.365	-102.39	NaN	-101.77
0.24936	-88.353	NaN	-88.856	-72.041	NaN	-71.962	-100.11	NaN	-99.632	-80.373	NaN	-80.389	-102.36	NaN	-101.81
0.24986	-88.346	NaN	-88.849	-72.04	NaN	-71.985	-100.09	NaN	-99.586	-80.37	NaN	-80.384	-102.33	NaN	-101.79
0.25036	-88.339	NaN	-88.857	-72.039	NaN	-72.061	-100.07	NaN	-99.572	-80.367	NaN	-80.413	-102.3	NaN	-101.75
0.25085	-88.333	NaN	-88.889	-72.038	NaN	-72.104	-100.06	NaN	-99.572	-80.363	NaN	-80.442	-102.27	NaN	-101.75
0.25135	-88.326	NaN	-88.847	-72.038	NaN	-72.173	-100.04	NaN	-99.578	-80.36	NaN	-80.455	-102.25	NaN	-101.8
0.25185	-88.319	NaN	-88.831	-72.037	NaN	-72.192	-100.03	NaN	-99.6	-80.357	NaN	-80.514	-102.22	NaN	-101.75
0.25235	-88.312	NaN	-88.764	-72.036	NaN	-72.189	-100.01	NaN	-99.696	-80.354	NaN	-80.55	-102.19	NaN	-101.68
0.25285	-88.306	NaN	-88.649	-72.035	NaN	-72.125	-99.994	NaN	-99.761	-80.351	NaN	-80.565	-102.16	NaN	-101.62
0.25335	-88.299	NaN	-88.599	-72.035	NaN	-72.025	-99.977	NaN	-99.74	-80.347	NaN	-80.531	-102.14	NaN	-101.65
0.25384	-88.292	NaN	-88.538	-72.034	NaN	-71.887	-99.961	NaN	-99.711	-80.344	NaN	-80.522	-102.11	NaN	-101.65
0.25434	-88.285	NaN	-88.539	-72.033	NaN	-71.86	-99.945	NaN	-99.777	-80.341	NaN	-80.528	-102.08	NaN	-101.6
0.25484	-88.279	NaN	-88.516	-72.032	NaN	-71.844	-99.929	NaN	-99.78	-80.338	NaN	-80.567	-102.05	NaN	-101.64
0.25534	-88.272	NaN	-88.487	-72.031	NaN	-71.877	-99.913	NaN	-99.691	-80.335	NaN	-80.595	-102.03	NaN	-101.67
0.25584	-88.265	NaN	-88.477	-72.031	NaN	-71.912	-99.897	NaN	-99.676	-80.332	NaN	-80.629	-102	NaN	-101.75
0.25633	-88.259	NaN	-88.491	-72.03	NaN	-71.989	-99.88	NaN	-99.691	-80.328	NaN	-80.672	-101.97	NaN	-101.8
0.25683	-88.252	NaN	-88.451	-72.029	NaN	-72.044	-99.864	NaN	-99.615	-80.325	NaN	-80.687	-101.95	NaN	-101.78
0.25733	-88.245	NaN	-88.473	-72.028	NaN	-72.071	-99.848	NaN	-99.462	-80.322	NaN	-80.724	-101.92	NaN	-101.83
0.25783	-88.239	NaN	-88.484	-72.028	NaN	-72.072	-99.832	NaN	-99.317	-80.319	NaN	-80.718	-101.89	NaN	-101.85
0.25833	-88.232	NaN	-88.494	-72.027	NaN	-72.066	-99.816	NaN	-99.191	-80.316	NaN	-80.688	-101.87	NaN	-101.87
0.25883	-88.225	NaN	-88.439	-72.026	NaN	-72.056	-99.8	NaN	-99.026	-80.313	NaN	-80.549	-101.84	NaN	-101.67
0.25932	-88.219	NaN	-88.458	-72.025	NaN	-72.06	-99.784	NaN	-98.916	-80.309	NaN	-80.266	-101.81	NaN	-101.62
0.25982	-88.212	NaN	-88.503	-72.024	NaN	-72.088	-99.768	NaN	-98.849	-80.306	NaN	-80.185	-101.79	NaN	-101.5
0.26032	-88.205	NaN	-88.496	-72.024	NaN	-72.082	-99.752	NaN	-98.789	-80.303	NaN	-80.155	-101.76	NaN	-101.5
0.26082	-88.199	NaN	-88.523	-72.023	NaN	-72.001	-99.736	NaN	-98.803	-80.3	NaN	-80.173	-101.74	NaN	-101.53
0.26132	-88.192	NaN	-88.551	-72.022	NaN	-71.954	-99.721	NaN	-98.918	-80.297	NaN	-80.23	-101.71	NaN	-101.6
0.26181	-88.185	NaN	-88.47	-72.021	NaN	-71.863	-99.705	NaN	-98.989	-80.294	NaN	-80.3	-101.68	NaN	-101.55
0.26231	-88.179	NaN	-88.396	-72.021	NaN	-71.798	-99.689	NaN	-98.999	-80.29	NaN	-80.345	-101.66	NaN	-101.6
0.26281	-88.172	NaN	-88.307	-72.02	NaN	-71.781	-99.673	NaN	-99.053	-80.287	NaN	-80.384	-101.63	NaN	-101.58
0.26331	-88.165	NaN	-88.233	-72.019	NaN	-71.773	-99.657	NaN	-99.04	-80.284	NaN	-80.416	-101.61	NaN	-101.46
0.26381	-88.159	NaN	-88.137	-72.018	NaN	-71.785	-99.641	NaN	-99.09	-80.281	NaN	-80.402	-101.58	NaN	-101.31
0.26431	-88.152	NaN	-88.142	-72.017	NaN	-71.819	-99.626	NaN	-99.093	-80.278	NaN	-80.361	-101.56	NaN	-101.35
0.2648	-88.146	NaN	-88.168	-72.017	NaN	-71.9	-99.61	NaN	-99.087	-80.275	NaN	-80.34	-101.53	NaN	-101.34
0.2653	-88.139	NaN	-88.338	-72.016	NaN	-71.932	-99.594	NaN	-99.108	-80.272	NaN	-80.284	-101.5	NaN	-101.22
0.2658	-88.132	NaN	-88.416	-72.015	NaN	-71.966	-99.578	NaN	-99.101	-80.268	NaN	-80.219	-101.48	NaN	-101.23
0.2663	-88.126	NaN	-88.463	-72.014	NaN	-71.986	-99.563	NaN	-99.031	-80.265	NaN	-80.216	-101.45	NaN	-101.24
0.2668	-88.119	NaN	-88.502	-72.014	NaN	-71.989	-99.547	NaN	-99.002	-80.262	NaN	-80.234	-101.43	NaN	-101.32
0.26729	-88.113	NaN	-88.514	-72.013	NaN	-71.938	-99.531	NaN	-98.966	-80.259	NaN	-80.201	-101.4	NaN	-101.42
0.26779	-88.106	NaN	-88.516	-72.012	NaN	-71.867	-99.516	NaN	-98.97	-80.256	NaN	-80.197	-101.38	NaN	-101.42
0.26829	-88.1	NaN	-88.538	-72.011	NaN	-71.881	-99.5	NaN	-98.96	-80.253	NaN	-80.232	-101.35	NaN	-101.35
0.26879	-88.093	NaN	-88.544	-72.011	NaN	-71.918	-99.485	NaN	-98.898	-80.25	NaN	-80.279	-101.33	NaN	-101.1
0.26929	-88.087	NaN	-88.512	-72.01	NaN	-71.933	-99.469	NaN	-98.841	-80.247	NaN	-80.277	-101.3	NaN	-101.09
0.26979	-88.08	NaN	-88.476	-72.009	NaN	-71.949	-99.453	NaN	-98.896	-80.243	NaN	-80.281	-101.28	NaN	-101.06
0.27028	-88.073	NaN	-88.409	-72.008	NaN	-71.954	-99.438	NaN	-98.904	-80.24	NaN	-80.269	-101.26	NaN	-101.22
0.27078	-88.067	NaN	-88.293	-72.007	NaN	-71.964	-99.422	NaN	-98.999	-80.237	NaN	-80.274	-101.23	NaN	-101.28
0.27128	-88.06	NaN	-88.082	-72.007	NaN	-71.966	-99.407	NaN	-99.093	-80.234	NaN	-80.262	-101.21	NaN	-101.39
0.27178	-88.054	NaN	-88.003	-72.006	NaN	-71.975	-99.391	NaN	-99.043	-80.231	NaN	-80.208	-101.18	NaN	-101.34
0.27228	-88.047	NaN	-87.942	-72.005	NaN	-71.998	-99.376	NaN	-99.118	-80.228	NaN	-80.103	-101.16	NaN	-101.36
0.27277	-88.041	NaN	-88.053	-72.004	NaN	-72.005	-99.36	NaN	-99.125	-80.225	NaN	-80.098	-101.13	NaN	-101.46
0.27327	-88.034	NaN	-88.107	-72.004	NaN	-72.02	-99.345	NaN	-99.061	-80.222	NaN	-80.102	-101.11	NaN	-101.41
0.27377	-88.028	NaN	-88.155	-72.003	NaN	-72.048	-99.33	NaN	-98.329	-80.219	NaN	-80.158	-101.09	NaN	-101.07
0.27427	-88.021	NaN	-88.127	-72.002	NaN	-72.074	-99.314	NaN	-98.159	-80.215	NaN	-80.246	-101.06	NaN	-100.81
0.27477	-88.015	NaN	-88.139	-72.001	NaN	-72.105	-99.299	NaN	-98.229	-80.212	NaN	-80.246	-101.04	NaN	-100.72
0.27527	-88.008	NaN	-88.077	-72.001	NaN	-72.136	-99.283	NaN	-98.571	-80.209	NaN	-80.209	-101.01	NaN	-100.72
0.27576	-88.002	NaN	-88.048	-72	NaN	-72.153	-99.268	NaN	-98.611	-80.206	NaN	-80.175	-100.99	NaN	-100.55
0.27626	-87.996	NaN	-88.045	-71.999	NaN	-72.179	-99.253	NaN	-98.71	-80.203	NaN	-80.062	-100.97	NaN	-100.45
0.27676	-87.989	NaN	-88.113	-71.998	NaN	-72.202	-99.238	NaN	-98.814	-80.2	NaN	-80.004	-100.94	NaN	-100.43
0.27726	-87.983	NaN	-88.164	-71.997	NaN	-72.203	-99.222	NaN	-98.876	-80.197	NaN	-79.946	-100.92	NaN	-100.6
0.27776	-87.976	NaN	-88.206	-71.997	NaN	-72.194	-99.207	NaN	-98.995	-80.194	NaN	-79.907	-100.9	NaN	-100.62
0.27825	-87.97	NaN	-88.228	-71.996	NaN	-72.154	-99.192	NaN	-99.182	-80.191	NaN	-79.882	-100.87	NaN	-100.72
0.27875	-87.963	NaN	-88.218	-71.995	NaN	-72.142	-99.177	NaN	-99.163	-80.188	NaN	-79.863	-100.85	NaN	-100.82
0.27925	-87.957	NaN	-88.122	-71.994	NaN	-72.15	-99.161	NaN	-99.067	-80.185	NaN	-79.836	-100.83	NaN	-100.85
0.27975	-87.95	NaN	-88.045	-71.994	NaN	-72.169	-99.146	NaN	-99.111	-80.182	NaN	-79.834	-100.8	NaN	-100.94
0.28025	-87.944	NaN	-87.934	-71.993	NaN	-72.173	-99.131	NaN	-99.133	-80.178	NaN	-79.772	-100.78	NaN	-100.91
0.28075	-87.938	NaN	-87.891	-71.992	NaN	-72.16	-99.116	NaN	-99.086	-80.175	NaN	-79.731	-100.76	NaN	-100.7
0.28124	-87.931	NaN	-87.875	-71.991	NaN	-72.128	-99.101	NaN	-99.05	-80.172	NaN	-79.711	-100.73	NaN	-100.55
0.28174	-87.925	NaN	-87.905	-71.991	NaN	-72.073	-99.086	NaN	-98.854	-80.169	NaN	-79.715	-100.71	NaN	-100.52
0.28224	-87.918	NaN	-87.915	-71.99	NaN	-71.943	-99.071	NaN	-98.767	-80.166	NaN	-79.724	-100.69	NaN	-100.4
0.28274	-87.912	NaN	-87.959	-71.989	NaN	-71.814	-99.056	NaN	-98.64	-80.163	NaN	-79.769	-100.66	NaN	-100.07
0.28324	-87.906	NaN	-88.095	-71.988	NaN	-71.804	-99.041	NaN	-98.628	-80.16	NaN	-79.928	-100.64	NaN	-99.682
0.28373	-87.899	NaN	-88.163	-71.987	NaN	-71.81	-99.026	NaN	-98.597	-80.157	NaN	-79.991	-100.62	NaN	-99.589
0.28423	-87.893	NaN	-88.202	-71.987	NaN	-71.826	-99.011	NaN	-98.565	-80.154	NaN	-80.025	-100.6	NaN	-99.617
0.28473	-87.887	NaN	-88.239	-71.986	NaN	-71.881	-98.996	NaN	-98.577	-80.151	NaN	-80.093	-100.57	NaN	-99.93
0.28523	-87.88	NaN	-88.222	-71.985	NaN	-71.932	-98.981	NaN	-98.539	-80.148	NaN	-80.111	-100.55	NaN	-99.974
0.28573	-87.874	NaN	-88.161	-71.984	NaN	-71.937	-98.966	NaN	-98.524	-80.145	NaN	-80.126	-100.53	NaN	-100.18
0.28623	-87.867	NaN	-88.153	-71.984	NaN	-71.942	-98.951	NaN	-98.524	-80.142	NaN	-80.118	-100.51	NaN	-100.21
0.28672	-87.861	NaN	-88.143	-71.983	NaN	-71.924	-98.936	NaN	-98.754	-80.139	NaN	-80.06	-100.48	NaN	-100.22
0.28722	-87.855	NaN	-88.099	-71.982	NaN	-71.923	-98.921	NaN	-98.977	-80.136	NaN	-80.049	-100.46	NaN	-100.21
0.28772	-87.848	NaN	-88.066	-71.981	NaN	-71.922	-98.906	NaN	-98.947	-80.133	NaN	-80.032	-100.44	NaN	-100.17
0.28822	-87.842	NaN	-88.07	-71.981	NaN	-71.922	-98.891	NaN	-98.968	-80.13	NaN	-80.048	-100.42	NaN	-100.04
0.28872	-87.836	NaN	-88.095	-71.98	NaN	-71.938	-98.876	NaN	-99.009	-80.127	NaN	-80.05	-100.4	NaN	-99.981
0.28921	-87.829	NaN	-88.117	-71.979	NaN	-71.914	-98.862	NaN	-98.912	-80.124	NaN	-80.061	-100.37	NaN	-99.942
0.28971	-87.823	NaN	-88.159	-71.978	NaN	-71.916	-98.847	NaN	-98.861	-80.12	NaN	-80.027	-100.35	NaN	-99.975
0.29021	-87.817	NaN	-88.184	-71.978	NaN	-71.911	-98.832	NaN	-98.861	-80.117	NaN	-79.904	-100.33	NaN	-100.06
0.29071	-87.811	NaN	-88.165	-71.977	NaN	-71.876	-98.817	NaN	-98.905	-80.114	NaN	-79.772	-100.31	NaN	-100.07
0.29121	-87.804	NaN	-88.143	-71.976	NaN	-71.869	-98.802	NaN	-98.918	-80.111	NaN	-79.769	-100.29	NaN	-100.22
0.29171	-87.798	NaN	-88.137	-71.975	NaN	-71.851	-98.788	NaN	-98.902	-80.108	NaN	-79.782	-100.27	NaN	-100.14
0.2922	-87.792	NaN	-88.122	-71.974	NaN	-71.774	-98.773	NaN	-98.783	-80.105	NaN	-79.811	-100.25	NaN	-100.08
0.2927	-87.785	NaN	-88.106	-71.974	NaN	-71.731	-98.758	NaN	-98.44	-80.102	NaN	-79.878	-100.22	NaN	-100.01
0.2932	-87.779	NaN	-88.151	-71.973	NaN	-71.691	-98.744	NaN	-97.883	-80.099	NaN	-79.94	-100.2	NaN	-99.928
0.2937	-87.773	NaN	-88.146	-71.972	NaN	-71.657	-98.729	NaN	-97.824	-80.096	NaN	-79.92	-100.18	NaN	-99.829
0.2942	-87.767	NaN	-88.113	-71.971	NaN	-71.558	-98.714	NaN	-97.721	-80.093	NaN	-79.921	-100.16	NaN	-99.777
0.29469	-87.76	NaN	-88.036	-71.971	NaN	-71.585	-98.7	NaN	-97.659	-80.09	NaN	-79.895	-100.14	NaN	-99.808
0.29519	-87.754	NaN	-88.016	-71.97	NaN	-71.608	-98.685	NaN	-97.673	-80.087	NaN	-79.821	-100.12	NaN	-99.803
0.29569	-87.748	NaN	-87.883	-71.969	NaN	-71.643	-98.671	NaN	-97.657	-80.084	NaN	-79.573	-100.1	NaN	-99.756
0.29619	-87.742	NaN	-87.845	-71.968	NaN	-71.675	-98.656	NaN	-97.567	-80.081	NaN	-79.353	-100.08	NaN	-99.635
0.29669	-87.735	NaN	-87.803	-71.968	NaN	-71.719	-98.642	NaN	-97.54	-80.078	NaN	-79.252	-100.05	NaN	-99.627
0.29719	-87.729	NaN	-87.817	-71.967	NaN	-71.757	-98.627	NaN	-97.663	-80.075	NaN	-79.232	-100.03	NaN	-99.334
0.29768	-87.723	NaN	-87.781	-71.966	NaN	-71.806	-98.612	NaN	-97.865	-80.072	NaN	-79.229	-100.01	NaN	-99.188
0.29818	-87.717	NaN	-87.727	-71.965	NaN	-71.826	-98.598	NaN	-97.994	-80.069	NaN	-79.262	-99.993	NaN	-99.205
0.29868	-87.711	NaN	-87.729	-71.965	NaN	-71.803	-98.584	NaN	-98.01	-80.066	NaN	-79.27	-99.972	NaN	-99.17
0.29918	-87.704	NaN	-87.725	-71.964	NaN	-71.86	-98.569	NaN	-98.042	-80.063	NaN	-79.289	-99.952	NaN	-99.296
0.29968	-87.698	NaN	-87.737	-71.963	NaN	-71.904	-98.555	NaN	-98.042	-80.06	NaN	-79.421	-99.931	NaN	-99.295
0.30017	-87.692	NaN	-87.66	-71.962	NaN	-71.895	-98.54	NaN	-97.998	-80.057	NaN	-79.518	-99.911	NaN	-99.373
0.30067	-87.686	NaN	-87.687	-71.962	NaN	-71.899	-98.526	NaN	-97.998	-80.054	NaN	-79.574	-99.89	NaN	-99.421
0.30117	-87.68	NaN	-87.62	-71.961	NaN	-71.866	-98.511	NaN	-97.993	-80.051	NaN	-79.602	-99.87	NaN	-99.421
0.30167	-87.673	NaN	-87.569	-71.96	NaN	-71.864	-98.497	NaN	-97.911	-80.048	NaN	-79.633	-99.85	NaN	-99.461
0.30217	-87.667	NaN	-87.475	-71.959	NaN	-71.855	-98.483	NaN	-97.781	-80.045	NaN	-79.643	-99.83	NaN	-99.521
0.30267	-87.661	NaN	-87.416	-71.958	NaN	-71.909	-98.468	NaN	-97.752	-80.042	NaN	-79.7	-99.81	NaN	-99.606
0.30316	-87.655	NaN	-87.384	-71.958	NaN	-71.913	-98.454	NaN	-97.323	-80.039	NaN	-79.768	-99.79	NaN	-99.585
0.30366	-87.649	NaN	-87.346	-71.957	NaN	-71.892	-98.44	NaN	-96.896	-80.036	NaN	-79.747	-99.77	NaN	-99.537
0.30416	-87.643	NaN	-87.291	-71.956	NaN	-71.877	-98.426	NaN	-96.632	-80.033	NaN	-79.745	-99.75	NaN	-99.479
0.30466	-87.636	NaN	-87.257	-71.955	NaN	-71.879	-98.411	NaN	-96.253	-80.03	NaN	-79.653	-99.73	NaN	-99.35
0.30516	-87.63	NaN	-87.232	-71.955	NaN	-71.886	-98.397	NaN	-96.244	-80.028	NaN	-79.566	-99.71	NaN	-99.226
0.30565	-87.624	NaN	-87.2	-71.954	NaN	-71.953	-98.383	NaN	-96.247	-80.025	NaN	-79.514	-99.69	NaN	-99.232
0.30615	-87.618	NaN	-87.212	-71.953	NaN	-72.017	-98.369	NaN	-96.292	-80.022	NaN	-79.485	-99.671	NaN	-99.226
0.30665	-87.612	NaN	-87.187	-71.952	NaN	-72.076	-98.355	NaN	-96.292	-80.019	NaN	-79.486	-99.651	NaN	-99.258
0.30715	-87.606	NaN	-87.09	-71.952	NaN	-72.105	-98.34	NaN	-96.337	-80.016	NaN	-79.494	-99.632	NaN	-99.389
0.30765	-87.6	NaN	-86.936	-71.951	NaN	-72.106	-98.326	NaN	-96.452	-80.013	NaN	-79.483	-99.612	NaN	-99.484
0.30815	-87.594	NaN	-86.926	-71.95	NaN	-72.134	-98.312	NaN	-96.632	-80.01	NaN	-79.447	-99.593	NaN	-99.425
0.30864	-87.587	NaN	-86.92	-71.949	NaN	-72.118	-98.298	NaN	-96.82	-80.007	NaN	-79.368	-99.573	NaN	-99.357
0.30914	-87.581	NaN	-86.899	-71.949	NaN	-72.089	-98.284	NaN	-97.128	-80.004	NaN	-79.349	-99.554	NaN	-99.176
0.30964	-87.575	NaN	-86.878	-71.948	NaN	-72.105	-98.27	NaN	-97.239	-80.001	NaN	-79.298	-99.535	NaN	-98.741
0.31014	-87.569	NaN	-86.856	-71.947	NaN	-72.123	-98.256	NaN	-97.326	-79.998	NaN	-79.281	-99.516	NaN	-98.262
0.31064	-87.563	NaN	-86.819	-71.946	NaN	-72.099	-98.242	NaN	-97.424	-79.995	NaN	-79.294	-99.496	NaN	-97.796
0.31113	-87.557	NaN	-86.794	-71.946	NaN	-72.128	-98.228	NaN	-97.492	-79.992	NaN	-79.285	-99.477	NaN	-97.717
0.31163	-87.551	NaN	-86.775	-71.945	NaN	-72.16	-98.214	NaN	-97.459	-79.989	NaN	-79.277	-99.458	NaN	-97.717
0.31213	-87.545	NaN	-86.797	-71.944	NaN	-72.174	-98.2	NaN	-97.305	-79.986	NaN	-79.267	-99.439	NaN	-97.883
0.31263	-87.539	NaN	-86.859	-71.943	NaN	-72.165	-98.186	NaN	-97.164	-79.983	NaN	-79.259	-99.421	NaN	-98.005
0.31313	-87.533	NaN	-86.882	-71.943	NaN	-72.172	-98.172	NaN	-97.099	-79.98	NaN	-79.219	-99.402	NaN	-98.176
0.31363	-87.527	NaN	-86.922	-71.942	NaN	-72.121	-98.158	NaN	-97.084	-79.977	NaN	-79.228	-99.383	NaN	-98.224
0.31412	-87.521	NaN	-86.943	-71.941	NaN	-72.062	-98.144	NaN	-97.19	-79.974	NaN	-79.231	-99.364	NaN	-98.263
0.31462	-87.515	NaN	-86.933	-71.94	NaN	-71.974	-98.13	NaN	-97.36	-79.972	NaN	-79.267	-99.346	NaN	-98.363
0.31512	-87.509	NaN	-86.945	-71.94	NaN	-72.004	-98.116	NaN	-97.47	-79.969	NaN	-79.392	-99.327	NaN	-98.5
0.31562	-87.503	NaN	-86.948	-71.939	NaN	-72.024	-98.102	NaN	-97.671	-79.966	NaN	-79.444	-99.308	NaN	-98.678
0.31612	-87.497	NaN	-86.967	-71.938	NaN	-72.027	-98.089	NaN	-97.875	-79.963	NaN	-79.473	-99.29	NaN	-98.655
0.31661	-87.491	NaN	-86.998	-71.937	NaN	-72.005	-98.075	NaN	-98.068	-79.96	NaN	-79.439	-99.272	NaN	-98.729
0.31711	-87.485	NaN	-87.026	-71.936	NaN	-71.955	-98.061	NaN	-98.188	-79.957	NaN	-79.399	-99.253	NaN	-98.764
0.31761	-87.479	NaN	-87.022	-71.936	NaN	-71.941	-98.047	NaN	-98.057	-79.954	NaN	-79.324	-99.235	NaN	-98.779
0.31811	-87.473	NaN	-87.016	-71.935	NaN	-71.95	-98.033	NaN	-97.874	-79.951	NaN	-79.283	-99.217	NaN	-98.79
0.31861	-87.467	NaN	-87.022	-71.934	NaN	-71.981	-98.02	NaN	-97.686	-79.948	NaN	-79.262	-99.198	NaN	-98.822
0.31911	-87.461	NaN	-87.043	-71.933	NaN	-72.004	-98.006	NaN	-97.604	-79.945	NaN	-79.294	-99.18	NaN	-98.897
0.3196	-87.455	NaN	-87.047	-71.933	NaN	-72.02	-97.992	NaN	-97.616	-79.942	NaN	-79.309	-99.162	NaN	-98.823
0.3201	-87.449	NaN	-87.026	-71.932	NaN	-72.015	-97.978	NaN	-97.721	-79.939	NaN	-79.317	-99.144	NaN	-98.808
0.3206	-87.443	NaN	-87.011	-71.931	NaN	-72.037	-97.965	NaN	-97.882	-79.937	NaN	-79.316	-99.126	NaN	-98.877
0.3211	-87.437	NaN	-87.055	-71.93	NaN	-72.026	-97.951	NaN	-97.952	-79.934	NaN	-79.328	-99.108	NaN	-98.921
0.3216	-87.431	NaN	-87.064	-71.93	NaN	-71.944	-97.937	NaN	-98.091	-79.931	NaN	-79.355	-99.091	NaN	-98.857
0.32209	-87.425	NaN	-87.111	-71.929	NaN	-71.893	-97.924	NaN	-98.164	-79.928	NaN	-79.369	-99.073	NaN	-98.857
0.32259	-87.419	NaN	-87.134	-71.928	NaN	-71.867	-97.91	NaN	-98.069	-79.925	NaN	-79.365	-99.055	NaN	-98.9
0.32309	-87.413	NaN	-87.146	-71.927	NaN	-71.88	-97.897	NaN	-98.027	-79.922	NaN	-79.351	-99.037	NaN	-98.587
0.32359	-87.407	NaN	-87.145	-71.927	NaN	-71.911	-97.883	NaN	-97.746	-79.919	NaN	-79.316	-99.02	NaN	-98.535
0.32409	-87.401	NaN	-87.109	-71.926	NaN	-71.976	-97.869	NaN	-97.251	-79.916	NaN	-79.257	-99.002	NaN	-98.506
0.32459	-87.395	NaN	-87.074	-71.925	NaN	-72.01	-97.856	NaN	-97.16	-79.913	NaN	-79.087	-98.985	NaN	-98.52
0.32508	-87.389	NaN	-87.064	-71.924	NaN	-72.013	-97.842	NaN	-97.119	-79.91	NaN	-79.038	-98.967	NaN	-98.492
0.32558	-87.383	NaN	-87.047	-71.924	NaN	-72.053	-97.829	NaN	-97.109	-79.908	NaN	-79.055	-98.95	NaN	-98.491
0.32608	-87.377	NaN	-87.07	-71.923	NaN	-72.082	-97.815	NaN	-97.123	-79.905	NaN	-79.081	-98.932	NaN	-98.52
0.32658	-87.371	NaN	-87.068	-71.922	NaN	-72.068	-97.802	NaN	-97.123	-79.902	NaN	-79.05	-98.915	NaN	-98.39
0.32708	-87.366	NaN	-87.095	-71.921	NaN	-72.092	-97.788	NaN	-97.113	-79.899	NaN	-79.097	-98.898	NaN	-98.39
0.32757	-87.36	NaN	-87.095	-71.921	NaN	-72.138	-97.775	NaN	-97.105	-79.896	NaN	-79.079	-98.881	NaN	-98.39
0.32807	-87.354	NaN	-87.076	-71.92	NaN	-72.118	-97.762	NaN	-97.105	-79.893	NaN	-79.039	-98.863	NaN	-98.35
0.32857	-87.348	NaN	-87.041	-71.919	NaN	-72.082	-97.748	NaN	-97.119	-79.89	NaN	-78.966	-98.846	NaN	-98.358
0.32907	-87.342	NaN	-87	-71.918	NaN	-71.972	-97.735	NaN	-97.242	-79.887	NaN	-78.981	-98.829	NaN	-98.419
0.32957	-87.336	NaN	-87.002	-71.918	NaN	-71.732	-97.721	NaN	-97.319	-79.885	NaN	-78.975	-98.812	NaN	-98.393
0.33007	-87.33	NaN	-87.003	-71.917	NaN	-71.723	-97.708	NaN	-97.355	-79.882	NaN	-78.994	-98.795	NaN	-98.483
0.33056	-87.324	NaN	-86.987	-71.916	NaN	-71.747	-97.695	NaN	-97.433	-79.879	NaN	-79.065	-98.779	NaN	-98.611
0.33106	-87.318	NaN	-86.984	-71.915	NaN	-71.81	-97.681	NaN	-97.503	-79.876	NaN	-79.064	-98.762	NaN	-98.785
0.33156	-87.313	NaN	-86.865	-71.915	NaN	-71.869	-97.668	NaN	-97.569	-79.873	NaN	-79.077	-98.745	NaN	-98.848
0.33206	-87.307	NaN	-86.685	-71.914	NaN	-71.928	-97.655	NaN	-97.56	-79.87	NaN	-79.064	-98.728	NaN	-98.982
0.33256	-87.301	NaN	-86.635	-71.913	NaN	-71.929	-97.641	NaN	-97.538	-79.867	NaN	-79.054	-98.712	NaN	-99.107
0.33305	-87.295	NaN	-86.508	-71.912	NaN	-71.936	-97.628	NaN	-97.459	-79.865	NaN	-78.987	-98.695	NaN	-99.081
0.33355	-87.289	NaN	-86.508	-71.912	NaN	-71.957	-97.615	NaN	-97.386	-79.862	NaN	-78.99	-98.678	NaN	-99.098
0.33405	-87.283	NaN	-86.528	-71.911	NaN	-71.995	-97.602	NaN	-97.317	-79.859	NaN	-78.988	-98.662	NaN	-99.135
0.33455	-87.278	NaN	-86.551	-71.91	NaN	-72.043	-97.588	NaN	-97.306	-79.856	NaN	-79.112	-98.645	NaN	-99.121
0.33505	-87.272	NaN	-86.567	-71.909	NaN	-72.06	-97.575	NaN	-97.232	-79.853	NaN	-79.148	-98.629	NaN	-99.026
0.33555	-87.266	NaN	-86.593	-71.909	NaN	-72.056	-97.562	NaN	-97.224	-79.85	NaN	-79.173	-98.613	NaN	-99.048
0.33604	-87.26	NaN	-86.585	-71.908	NaN	-72.055	-97.549	NaN	-97.225	-79.847	NaN	-79.289	-98.596	NaN	-98.982
0.33654	-87.254	NaN	-86.611	-71.907	NaN	-72.05	-97.536	NaN	-97.28	-79.845	NaN	-79.289	-98.58	NaN	-98.912
0.33704	-87.249	NaN	-86.653	-71.906	NaN	-72.007	-97.523	NaN	-97.325	-79.842	NaN	-79.31	-98.564	NaN	-98.857
0.33754	-87.243	NaN	-86.666	-71.906	NaN	-71.971	-97.51	NaN	-97.384	-79.839	NaN	-79.317	-98.548	NaN	-98.819
0.33804	-87.237	NaN	-86.78	-71.905	NaN	-71.912	-97.496	NaN	-97.427	-79.836	NaN	-79.323	-98.532	NaN	-98.813
0.33853	-87.231	NaN	-86.839	-71.904	NaN	-71.838	-97.483	NaN	-97.335	-79.833	NaN	-79.281	-98.515	NaN	-98.794
0.33903	-87.225	NaN	-86.876	-71.903	NaN	-71.846	-97.47	NaN	-97.355	-79.83	NaN	-79.309	-98.499	NaN	-98.814
0.33953	-87.22	NaN	-86.902	-71.903	NaN	-71.873	-97.457	NaN	-97.404	-79.828	NaN	-79.307	-98.484	NaN	-98.768
0.34003	-87.214	NaN	-86.962	-71.902	NaN	-71.944	-97.444	NaN	-97.422	-79.825	NaN	-79.311	-98.468	NaN	-98.718
0.34053	-87.208	NaN	-86.996	-71.901	NaN	-72.027	-97.431	NaN	-97.415	-79.822	NaN	-79.299	-98.452	NaN	-98.666
0.34103	-87.202	NaN	-87.05	-71.9	NaN	-72.066	-97.418	NaN	-97.402	-79.819	NaN	-79.342	-98.436	NaN	-98.585
0.34152	-87.197	NaN	-87.092	-71.9	NaN	-72.034	-97.405	NaN	-97.354	-79.816	NaN	-79.413	-98.42	NaN	-98.449
0.34202	-87.191	NaN	-87.136	-71.899	NaN	-72.005	-97.392	NaN	-97.201	-79.814	NaN	-79.477	-98.404	NaN	-98.449
0.34252	-87.185	NaN	-87.149	-71.898	NaN	-71.961	-97.379	NaN	-97.108	-79.811	NaN	-79.563	-98.389	NaN	-98.485
0.34302	-87.179	NaN	-87.13	-71.897	NaN	-71.923	-97.366	NaN	-97.088	-79.808	NaN	-79.651	-98.373	NaN	-98.52
0.34352	-87.174	NaN	-87.099	-71.897	NaN	-71.876	-97.353	NaN	-97.128	-79.805	NaN	-79.72	-98.358	NaN	-98.591
0.34401	-87.168	NaN	-87.051	-71.896	NaN	-71.912	-97.341	NaN	-97.195	-79.802	NaN	-79.763	-98.342	NaN	-98.694
0.34451	-87.162	NaN	-86.964	-71.895	NaN	-71.913	-97.328	NaN	-97.193	-79.799	NaN	-79.796	-98.327	NaN	-98.666
0.34501	-87.156	NaN	-86.967	-71.894	NaN	-71.938	-97.315	NaN	-97.135	-79.797	NaN	-79.827	-98.311	NaN	-98.706
0.34551	-87.151	NaN	-86.976	-71.894	NaN	-71.941	-97.302	NaN	-96.861	-79.794	NaN	-79.844	-98.296	NaN	-98.466
0.34601	-87.145	NaN	-87.015	-71.893	NaN	-71.988	-97.289	NaN	-96.554	-79.791	NaN	-79.859	-98.281	NaN	-98.195
0.34651	-87.139	NaN	-86.919	-71.892	NaN	-72.007	-97.276	NaN	-96.487	-79.788	NaN	-79.914	-98.265	NaN	-98.129
0.347	-87.134	NaN	-86.851	-71.891	NaN	-72.053	-97.263	NaN	-96.685	-79.785	NaN	-79.886	-98.25	NaN	-98.129
0.3475	-87.128	NaN	-86.766	-71.891	NaN	-72.043	-97.251	NaN	-96.636	-79.783	NaN	-79.831	-98.235	NaN	-98.201
0.348	-87.122	NaN	-86.746	-71.89	NaN	-72.089	-97.238	NaN	-96.696	-79.78	NaN	-79.801	-98.22	NaN	-98.141
0.3485	-87.117	NaN	-86.726	-71.889	NaN	-72.083	-97.225	NaN	-96.595	-79.777	NaN	-79.769	-98.205	NaN	-98.027
0.349	-87.111	NaN	-86.727	-71.888	NaN	-72.085	-97.212	NaN	-96.284	-79.774	NaN	-79.735	-98.19	NaN	-98.056
0.34949	-87.105	NaN	-86.726	-71.888	NaN	-72.105	-97.2	NaN	-96.231	-79.771	NaN	-79.725	-98.175	NaN	-98.1
0.34999	-87.1	NaN	-86.658	-71.887	NaN	-72.1	-97.187	NaN	-96.208	-79.769	NaN	-79.748	-98.16	NaN	-98.114
0.35049	-87.094	NaN	-86.566	-71.886	NaN	-72.078	-97.174	NaN	-96.176	-79.766	NaN	-79.706	-98.145	NaN	-98.317
0.35099	-87.088	NaN	-86.42	-71.885	NaN	-72.073	-97.162	NaN	-96.171	-79.763	NaN	-79.706	-98.13	NaN	-98.312
0.35149	-87.083	NaN	-86.356	-71.885	NaN	-72.044	-97.149	NaN	-96.224	-79.76	NaN	-79.748	-98.115	NaN	-98.259
0.35199	-87.077	NaN	-86.302	-71.884	NaN	-72.05	-97.136	NaN	-96.22	-79.758	NaN	-79.782	-98.1	NaN	-98.259
0.35248	-87.071	NaN	-86.326	-71.883	NaN	-72.069	-97.124	NaN	-96.313	-79.755	NaN	-79.777	-98.086	NaN	-98.262
0.35298	-87.066	NaN	-86.34	-71.882	NaN	-72.073	-97.111	NaN	-96.426	-79.752	NaN	-79.794	-98.071	NaN	-98.112
0.35348	-87.06	NaN	-86.364	-71.882	NaN	-72.083	-97.098	NaN	-96.456	-79.749	NaN	-79.824	-98.056	NaN	-98.048
0.35398	-87.054	NaN	-86.386	-71.881	NaN	-72.104	-97.086	NaN	-96.409	-79.746	NaN	-79.798	-98.042	NaN	-97.915
0.35448	-87.049	NaN	-86.364	-71.88	NaN	-72.069	-97.073	NaN	-96.409	-79.744	NaN	-79.798	-98.027	NaN	-97.883
0.35497	-87.043	NaN	-86.262	-71.88	NaN	-72.043	-97.061	NaN	-96.298	-79.741	NaN	-79.742	-98.013	NaN	-97.909
0.35547	-87.038	NaN	-86.237	-71.879	NaN	-71.993	-97.048	NaN	-96.165	-79.738	NaN	-79.712	-97.998	NaN	-97.99
0.35597	-87.032	NaN	-86.268	-71.878	NaN	-71.974	-97.036	NaN	-96.127	-79.735	NaN	-79.641	-97.984	NaN	-98.03
0.35647	-87.026	NaN	-86.332	-71.877	NaN	-71.96	-97.023	NaN	-96.15	-79.733	NaN	-79.53	-97.97	NaN	-97.882
0.35697	-87.021	NaN	-86.434	-71.877	NaN	-71.935	-97.011	NaN	-96.047	-79.73	NaN	-79.496	-97.955	NaN	-97.769
0.35747	-87.015	NaN	-86.492	-71.876	NaN	-71.967	-96.998	NaN	-96.075	-79.727	NaN	-79.479	-97.941	NaN	-97.847
0.35796	-87.01	NaN	-86.531	-71.875	NaN	-71.976	-96.986	NaN	-96.04	-79.724	NaN	-79.441	-97.927	NaN	-97.836
0.35846	-87.004	NaN	-86.571	-71.874	NaN	-71.987	-96.973	NaN	-95.985	-79.722	NaN	-79.42	-97.913	NaN	-97.828
0.35896	-86.998	NaN	-86.574	-71.874	NaN	-72.004	-96.961	NaN	-95.967	-79.719	NaN	-79.44	-97.898	NaN	-97.853
0.35946	-86.993	NaN	-86.523	-71.873	NaN	-72.038	-96.949	NaN	-95.974	-79.716	NaN	-79.445	-97.884	NaN	-97.83
0.35996	-86.987	NaN	-86.528	-71.872	NaN	-72.03	-96.936	NaN	-96.058	-79.713	NaN	-79.402	-97.87	NaN	-97.795
0.36045	-86.982	NaN	-86.548	-71.871	NaN	-72.016	-96.924	NaN	-96.09	-79.711	NaN	-79.383	-97.856	NaN	-97.815
0.36095	-86.976	NaN	-86.528	-71.871	NaN	-71.983	-96.911	NaN	-96.139	-79.708	NaN	-79.428	-97.842	NaN	-97.796
0.36145	-86.971	NaN	-86.544	-71.87	NaN	-71.957	-96.899	NaN	-96.228	-79.705	NaN	-79.404	-97.828	NaN	-97.796
0.36195	-86.965	NaN	-86.543	-71.869	NaN	-71.909	-96.887	NaN	-96.275	-79.702	NaN	-79.405	-97.815	NaN	-97.816
0.36245	-86.96	NaN	-86.54	-71.868	NaN	-71.909	-96.874	NaN	-96.29	-79.7	NaN	-79.438	-97.801	NaN	-97.836
0.36295	-86.954	NaN	-86.54	-71.868	NaN	-71.923	-96.862	NaN	-96.327	-79.697	NaN	-79.471	-97.787	NaN	-97.868
0.36344	-86.948	NaN	-86.543	-71.867	NaN	-71.973	-96.85	NaN	-96.348	-79.694	NaN	-79.468	-97.773	NaN	-97.87
0.36394	-86.943	NaN	-86.537	-71.866	NaN	-72.026	-96.838	NaN	-96.293	-79.691	NaN	-79.376	-97.76	NaN	-97.87
0.36444	-86.937	NaN	-86.544	-71.865	NaN	-72.076	-96.825	NaN	-96.272	-79.689	NaN	-79.266	-97.746	NaN	-97.992
0.36494	-86.932	NaN	-86.484	-71.865	NaN	-72.095	-96.813	NaN	-96.197	-79.686	NaN	-79.287	-97.732	NaN	-98.054
0.36544	-86.926	NaN	-86.385	-71.864	NaN	-72.089	-96.801	NaN	-96.246	-79.683	NaN	-79.303	-97.719	NaN	-98.106
0.36593	-86.921	NaN	-86.305	-71.863	NaN	-72.094	-96.789	NaN	-96.235	-79.681	NaN	-79.363	-97.705	NaN	-98.204
0.36643	-86.915	NaN	-86.368	-71.862	NaN	-72.093	-96.776	NaN	-96.165	-79.678	NaN	-79.404	-97.692	NaN	-98.286
0.36693	-86.91	NaN	-86.361	-71.862	NaN	-72.082	-96.764	NaN	-96.138	-79.675	NaN	-79.419	-97.678	NaN	-98.279
0.36743	-86.904	NaN	-86.399	-71.861	NaN	-72.092	-96.752	NaN	-95.469	-79.672	NaN	-79.401	-97.665	NaN	-98.134
0.36793	-86.899	NaN	-86.401	-71.86	NaN	-72.127	-96.74	NaN	-95.188	-79.67	NaN	-79.367	-97.651	NaN	-98.1
0.36843	-86.893	NaN	-86.375	-71.859	NaN	-72.136	-96.728	NaN	-94.891	-79.667	NaN	-79.391	-97.638	NaN	-98.211
0.36892	-86.888	NaN	-86.377	-71.859	NaN	-72.116	-96.716	NaN	-94.67	-79.664	NaN	-79.417	-97.625	NaN	-98.346
0.36942	-86.882	NaN	-86.384	-71.858	NaN	-72.131	-96.704	NaN	-94.67	-79.661	NaN	-79.419	-97.612	NaN	-98.558
0.36992	-86.877	NaN	-86.399	-71.857	NaN	-72.098	-96.692	NaN	-94.674	-79.659	NaN	-79.437	-97.598	NaN	-98.678
0.37042	-86.872	NaN	-86.456	-71.857	NaN	-72.018	-96.68	NaN	-94.764	-79.656	NaN	-79.434	-97.585	NaN	-98.639
0.37092	-86.866	NaN	-86.455	-71.856	NaN	-71.951	-96.667	NaN	-94.717	-79.653	NaN	-79.421	-97.572	NaN	-98.582
0.37141	-86.861	NaN	-86.411	-71.855	NaN	-71.938	-96.655	NaN	-94.723	-79.651	NaN	-79.467	-97.559	NaN	-98.524
0.37191	-86.855	NaN	-86.43	-71.854	NaN	-71.898	-96.643	NaN	-94.792	-79.648	NaN	-79.489	-97.546	NaN	-98.489
0.37241	-86.85	NaN	-86.477	-71.854	NaN	-71.883	-96.631	NaN	-94.909	-79.645	NaN	-79.451	-97.533	NaN	-98.549
0.37291	-86.844	NaN	-86.482	-71.853	NaN	-71.904	-96.619	NaN	-94.873	-79.643	NaN	-79.397	-97.52	NaN	-98.604
0.37341	-86.839	NaN	-86.545	-71.852	NaN	-71.918	-96.607	NaN	-95.002	-79.64	NaN	-79.322	-97.507	NaN	-98.565
0.37391	-86.833	NaN	-86.631	-71.851	NaN	-71.881	-96.595	NaN	-95.033	-79.637	NaN	-79.27	-97.494	NaN	-98.613
0.3744	-86.828	NaN	-86.649	-71.851	NaN	-71.883	-96.584	NaN	-95.054	-79.634	NaN	-79.238	-97.481	NaN	-98.613
0.3749	-86.823	NaN	-86.645	-71.85	NaN	-71.857	-96.572	NaN	-95.252	-79.632	NaN	-79.217	-97.469	NaN	-98.52
0.3754	-86.817	NaN	-86.653	-71.849	NaN	-71.836	-96.56	NaN	-95.362	-79.629	NaN	-79.188	-97.456	NaN	-98.24
0.3759	-86.812	NaN	-86.668	-71.848	NaN	-71.839	-96.548	NaN	-95.362	-79.626	NaN	-79.216	-97.443	NaN	-97.883
0.3764	-86.806	NaN	-86.672	-71.848	NaN	-71.861	-96.536	NaN	-95.173	-79.624	NaN	-79.211	-97.431	NaN	-97.728
0.37689	-86.801	NaN	-86.654	-71.847	NaN	-71.866	-96.524	NaN	-94.833	-79.621	NaN	-79.17	-97.418	NaN	-97.726
0.37739	-86.796	NaN	-86.652	-71.846	NaN	-71.899	-96.512	NaN	-94.758	-79.618	NaN	-79.157	-97.405	NaN	-97.818
0.37789	-86.79	NaN	-86.666	-71.845	NaN	-71.925	-96.5	NaN	-94.758	-79.616	NaN	-79.088	-97.393	NaN	-97.889
0.37839	-86.785	NaN	-86.64	-71.845	NaN	-71.941	-96.488	NaN	-94.83	-79.613	NaN	-79.029	-97.38	NaN	-97.943
0.37889	-86.779	NaN	-86.602	-71.844	NaN	-71.943	-96.477	NaN	-94.886	-79.61	NaN	-79.042	-97.368	NaN	-98.005
0.37939	-86.774	NaN	-86.569	-71.843	NaN	-72.008	-96.465	NaN	-95.002	-79.608	NaN	-79.08	-97.355	NaN	-98.202
0.37988	-86.769	NaN	-86.587	-71.843	NaN	-72.066	-96.453	NaN	-94.937	-79.605	NaN	-79.123	-97.343	NaN	-98.272
0.38038	-86.763	NaN	-86.481	-71.842	NaN	-72.07	-96.441	NaN	-94.752	-79.602	NaN	-79.166	-97.331	NaN	-98.382
0.38088	-86.758	NaN	-86.482	-71.841	NaN	-72.049	-96.43	NaN	-94.813	-79.6	NaN	-79.254	-97.318	NaN	-98.407
0.38138	-86.753	NaN	-86.491	-71.84	NaN	-72.034	-96.418	NaN	-94.752	-79.597	NaN	-79.279	-97.306	NaN	-98.573
0.38188	-86.747	NaN	-86.521	-71.84	NaN	-71.858	-96.406	NaN	-94.683	-79.594	NaN	-79.29	-97.294	NaN	-98.681
0.38237	-86.742	NaN	-86.5	-71.839	NaN	-71.73	-96.394	NaN	-94.819	-79.592	NaN	-79.289	-97.282	NaN	-98.732
0.38287	-86.737	NaN	-86.47	-71.838	NaN	-71.719	-96.383	NaN	-95.172	-79.589	NaN	-79.287	-97.269	NaN	-98.788
0.38337	-86.731	NaN	-86.417	-71.837	NaN	-71.726	-96.371	NaN	-95.352	-79.586	NaN	-79.269	-97.257	NaN	-98.709
0.38387	-86.726	NaN	-86.42	-71.837	NaN	-71.821	-96.359	NaN	-95.445	-79.584	NaN	-79.277	-97.245	NaN	-98.822
0.38437	-86.721	NaN	-86.385	-71.836	NaN	-71.939	-96.348	NaN	-95.62	-79.581	NaN	-79.335	-97.233	NaN	-98.834
0.38487	-86.715	NaN	-86.34	-71.835	NaN	-72.039	-96.336	NaN	-95.716	-79.578	NaN	-79.384	-97.221	NaN	-98.718
0.38536	-86.71	NaN	-86.275	-71.834	NaN	-72.079	-96.324	NaN	-95.774	-79.576	NaN	-79.396	-97.209	NaN	-98.663
0.38586	-86.705	NaN	-86.201	-71.834	NaN	-72.111	-96.313	NaN	-95.812	-79.573	NaN	-79.396	-97.197	NaN	-98.729
0.38636	-86.699	NaN	-86.092	-71.833	NaN	-72.146	-96.301	NaN	-95.726	-79.57	NaN	-79.401	-97.185	NaN	-98.691
0.38686	-86.694	NaN	-86.045	-71.832	NaN	-72.141	-96.29	NaN	-95.704	-79.568	NaN	-79.396	-97.173	NaN	-98.616
0.38736	-86.689	NaN	-86.046	-71.831	NaN	-72.151	-96.278	NaN	-95.628	-79.565	NaN	-79.377	-97.162	NaN	-98.578
0.38785	-86.683	NaN	-86.073	-71.831	NaN	-72.151	-96.267	NaN	-95.614	-79.562	NaN	-79.386	-97.15	NaN	-98.607
0.38835	-86.678	NaN	-86.087	-71.83	NaN	-72.144	-96.255	NaN	-95.643	-79.56	NaN	-79.363	-97.138	NaN	-98.584
0.38885	-86.673	NaN	-86.063	-71.829	NaN	-72.057	-96.243	NaN	-95.703	-79.557	NaN	-79.345	-97.126	NaN	-98.628
0.38935	-86.667	NaN	-86.089	-71.829	NaN	-71.973	-96.232	NaN	-95.738	-79.554	NaN	-79.357	-97.115	NaN	-98.628
0.38985	-86.662	NaN	-86.061	-71.828	NaN	-71.923	-96.22	NaN	-95.755	-79.552	NaN	-79.385	-97.103	NaN	-98.587
0.39035	-86.657	NaN	-86.082	-71.827	NaN	-71.923	-96.209	NaN	-95.66	-79.549	NaN	-79.39	-97.091	NaN	-98.52
0.39084	-86.652	NaN	-86.134	-71.826	NaN	-71.954	-96.198	NaN	-95.541	-79.547	NaN	-79.396	-97.08	NaN	-98.568
0.39134	-86.646	NaN	-86.172	-71.826	NaN	-71.98	-96.186	NaN	-95.42	-79.544	NaN	-79.457	-97.068	NaN	-98.556
0.39184	-86.641	NaN	-86.231	-71.825	NaN	-71.99	-96.175	NaN	-95.104	-79.541	NaN	-79.518	-97.057	NaN	-98.594
0.39234	-86.636	NaN	-86.326	-71.824	NaN	-72.044	-96.163	NaN	-94.944	-79.539	NaN	-79.534	-97.045	NaN	-98.608
0.39284	-86.631	NaN	-86.279	-71.823	NaN	-72.051	-96.152	NaN	-94.92	-79.536	NaN	-79.573	-97.034	NaN	-98.616
0.39333	-86.625	NaN	-86.218	-71.823	NaN	-71.892	-96.14	NaN	-94.906	-79.533	NaN	-79.612	-97.022	NaN	-98.601
0.39383	-86.62	NaN	-86.199	-71.822	NaN	-71.856	-96.129	NaN	-94.984	-79.531	NaN	-79.634	-97.011	NaN	-98.495
0.39433	-86.615	NaN	-86.167	-71.821	NaN	-71.834	-96.118	NaN	-95.074	-79.528	NaN	-79.585	-97	NaN	-98.436
0.39483	-86.61	NaN	-86.131	-71.821	NaN	-71.826	-96.106	NaN	-95.074	-79.526	NaN	-79.583	-96.988	NaN	-98.378
0.39533	-86.604	NaN	-86.13	-71.82	NaN	-71.793	-96.095	NaN	-95.133	-79.523	NaN	-79.538	-96.977	NaN	-98.323
0.39583	-86.599	NaN	-86.157	-71.819	NaN	-71.471	-96.084	NaN	-95.3	-79.52	NaN	-79.489	-96.966	NaN	-98.219
0.39632	-86.594	NaN	-86.184	-71.818	NaN	-71.506	-96.072	NaN	-95.361	-79.518	NaN	-79.471	-96.955	NaN	-98.019
0.39682	-86.589	NaN	-86.24	-71.818	NaN	-71.578	-96.061	NaN	-95.506	-79.515	NaN	-79.422	-96.944	NaN	-97.766
0.39732	-86.584	NaN	-86.259	-71.817	NaN	-71.607	-96.05	NaN	-95.587	-79.513	NaN	-79.45	-96.932	NaN	-97.703
0.39782	-86.578	NaN	-86.208	-71.816	NaN	-71.646	-96.039	NaN	-95.51	-79.51	NaN	-79.447	-96.921	NaN	-97.67
0.39832	-86.573	NaN	-86.26	-71.815	NaN	-71.648	-96.027	NaN	-95.458	-79.507	NaN	-79.464	-96.91	NaN	-97.661
0.39881	-86.568	NaN	-86.243	-71.815	NaN	-71.653	-96.016	NaN	-95.408	-79.505	NaN	-79.484	-96.899	NaN	-97.645
0.39931	-86.563	NaN	-86.266	-71.814	NaN	-71.622	-96.005	NaN	-95.336	-79.502	NaN	-79.495	-96.888	NaN	-97.677
0.39981	-86.558	NaN	-86.279	-71.813	NaN	-71.622	-95.994	NaN	-95.304	-79.5	NaN	-79.472	-96.877	NaN	-97.758
0.40031	-86.552	NaN	-86.266	-71.812	NaN	-71.606	-95.982	NaN	-95.262	-79.497	NaN	-79.444	-96.867	NaN	-97.868
0.40081	-86.547	NaN	-86.285	-71.812	NaN	-71.616	-95.971	NaN	-95.277	-79.494	NaN	-79.436	-96.856	NaN	-97.868
0.40131	-86.542	NaN	-86.256	-71.811	NaN	-71.624	-95.96	NaN	-95.35	-79.492	NaN	-79.449	-96.845	NaN	-98.001
0.4018	-86.537	NaN	-86.254	-71.81	NaN	-71.643	-95.949	NaN	-95.35	-79.489	NaN	-79.453	-96.834	NaN	-97.79
0.4023	-86.532	NaN	-86.249	-71.81	NaN	-71.598	-95.938	NaN	-95.283	-79.487	NaN	-79.518	-96.823	NaN	-97.687
0.4028	-86.527	NaN	-86.28	-71.809	NaN	-71.589	-95.927	NaN	-95.248	-79.484	NaN	-79.579	-96.812	NaN	-97.674
0.4033	-86.521	NaN	-86.278	-71.808	NaN	-71.536	-95.916	NaN	-95.14	-79.481	NaN	-79.594	-96.802	NaN	-97.687
0.4038	-86.516	NaN	-86.305	-71.807	NaN	-71.512	-95.905	NaN	-95.108	-79.479	NaN	-79.615	-96.791	NaN	-97.656
0.40429	-86.511	NaN	-86.338	-71.807	NaN	-71.532	-95.893	NaN	-95.039	-79.476	NaN	-79.66	-96.78	NaN	-97.612
0.40479	-86.506	NaN	-86.327	-71.806	NaN	-71.535	-95.882	NaN	-95.036	-79.474	NaN	-79.64	-96.77	NaN	-97.508
0.40529	-86.501	NaN	-86.311	-71.805	NaN	-71.56	-95.871	NaN	-95.001	-79.471	NaN	-79.615	-96.759	NaN	-97.41
0.40579	-86.496	NaN	-86.243	-71.804	NaN	-71.593	-95.86	NaN	-94.894	-79.468	NaN	-79.651	-96.749	NaN	-97.279
0.40629	-86.491	NaN	-86.27	-71.804	NaN	-71.604	-95.849	NaN	-94.81	-79.466	NaN	-79.655	-96.738	NaN	-97.381
0.40679	-86.486	NaN	-86.312	-71.803	NaN	-71.579	-95.838	NaN	-94.689	-79.463	NaN	-79.644	-96.728	NaN	-97.381
0.40728	-86.48	NaN	-86.353	-71.802	NaN	-71.58	-95.827	NaN	-94.606	-79.461	NaN	-79.647	-96.717	NaN	-97.441
0.40778	-86.475	NaN	-86.405	-71.802	NaN	-71.513	-95.816	NaN	-94.593	-79.458	NaN	-79.726	-96.707	NaN	-97.526
0.40828	-86.47	NaN	-86.423	-71.801	NaN	-71.533	-95.805	NaN	-94.602	-79.456	NaN	-79.768	-96.696	NaN	-97.597
0.40878	-86.465	NaN	-86.463	-71.8	NaN	-71.552	-95.794	NaN	-94.587	-79.453	NaN	-79.823	-96.686	NaN	-97.629
0.40928	-86.46	NaN	-86.517	-71.799	NaN	-71.603	-95.783	NaN	-94.622	-79.45	NaN	-79.832	-96.676	NaN	-97.717
0.40977	-86.455	NaN	-86.533	-71.799	NaN	-71.654	-95.773	NaN	-94.622	-79.448	NaN	-79.815	-96.666	NaN	-97.731
0.41027	-86.45	NaN	-86.539	-71.798	NaN	-71.678	-95.762	NaN	-94.58	-79.445	NaN	-79.78	-96.655	NaN	-97.719
0.41077	-86.445	NaN	-86.532	-71.797	NaN	-71.684	-95.751	NaN	-94.627	-79.443	NaN	-79.805	-96.645	NaN	-97.654
0.41127	-86.44	NaN	-86.465	-71.796	NaN	-71.663	-95.74	NaN	-94.769	-79.44	NaN	-79.824	-96.635	NaN	-97.626
0.41177	-86.435	NaN	-86.484	-71.796	NaN	-71.669	-95.729	NaN	-94.851	-79.438	NaN	-79.846	-96.625	NaN	-97.654
0.41227	-86.43	NaN	-86.436	-71.795	NaN	-71.702	-95.718	NaN	-94.891	-79.435	NaN	-79.895	-96.615	NaN	-97.803
0.41276	-86.424	NaN	-86.387	-71.794	NaN	-71.692	-95.707	NaN	-95.039	-79.433	NaN	-79.892	-96.604	NaN	-97.783
0.41326	-86.419	NaN	-86.364	-71.794	NaN	-71.683	-95.696	NaN	-95.094	-79.43	NaN	-79.82	-96.594	NaN	-97.845
0.41376	-86.414	NaN	-86.312	-71.793	NaN	-71.681	-95.686	NaN	-95.04	-79.427	NaN	-79.805	-96.584	NaN	-98.01
0.41426	-86.409	NaN	-86.244	-71.792	NaN	-71.674	-95.675	NaN	-94.946	-79.425	NaN	-79.768	-96.574	NaN	-98.173
0.41476	-86.404	NaN	-86.211	-71.791	NaN	-71.672	-95.664	NaN	-94.94	-79.422	NaN	-79.776	-96.564	NaN	-98.147
0.41525	-86.399	NaN	-86.209	-71.791	NaN	-71.662	-95.653	NaN	-94.766	-79.42	NaN	-79.803	-96.555	NaN	-98.262
0.41575	-86.394	NaN	-86.301	-71.79	NaN	-71.677	-95.642	NaN	-94.712	-79.417	NaN	-79.817	-96.545	NaN	-98.282
0.41625	-86.389	NaN	-86.396	-71.789	NaN	-71.664	-95.632	NaN	-94.709	-79.415	NaN	-79.818	-96.535	NaN	-98.057
0.41675	-86.384	NaN	-86.433	-71.788	NaN	-71.631	-95.621	NaN	-94.662	-79.412	NaN	-79.827	-96.525	NaN	-98.022
0.41725	-86.379	NaN	-86.42	-71.788	NaN	-71.61	-95.61	NaN	-94.694	-79.41	NaN	-79.827	-96.515	NaN	-98.01
0.41775	-86.374	NaN	-86.418	-71.787	NaN	-71.593	-95.6	NaN	-94.747	-79.407	NaN	-79.824	-96.505	NaN	-97.97
0.41824	-86.369	NaN	-86.327	-71.786	NaN	-71.538	-95.589	NaN	-94.741	-79.405	NaN	-79.848	-96.496	NaN	-97.94
0.41874	-86.364	NaN	-86.288	-71.786	NaN	-71.458	-95.578	NaN	-94.784	-79.402	NaN	-79.849	-96.486	NaN	-97.923
0.41924	-86.359	NaN	-86.317	-71.785	NaN	-71.41	-95.567	NaN	-94.789	-79.4	NaN	-79.847	-96.476	NaN	-97.914
0.41974	-86.354	NaN	-86.339	-71.784	NaN	-71.374	-95.557	NaN	-94.865	-79.397	NaN	-79.764	-96.466	NaN	-97.984
0.42024	-86.349	NaN	-86.359	-71.783	NaN	-71.323	-95.546	NaN	-94.856	-79.394	NaN	-79.731	-96.457	NaN	-98.085
0.42073	-86.344	NaN	-86.366	-71.783	NaN	-71.309	-95.536	NaN	-94.815	-79.392	NaN	-79.704	-96.447	NaN	-98.218
0.42123	-86.339	NaN	-86.38	-71.782	NaN	-71.284	-95.525	NaN	-94.895	-79.389	NaN	-79.682	-96.438	NaN	-98.013
0.42173	-86.334	NaN	-86.42	-71.781	NaN	-71.287	-95.514	NaN	-95.027	-79.387	NaN	-79.638	-96.428	NaN	-97.63
0.42223	-86.329	NaN	-86.43	-71.781	NaN	-71.288	-95.504	NaN	-95.059	-79.384	NaN	-79.536	-96.419	NaN	-97.477
0.42273	-86.324	NaN	-86.351	-71.78	NaN	-71.295	-95.493	NaN	-95.108	-79.382	NaN	-79.451	-96.409	NaN	-97.371
0.42323	-86.319	NaN	-86.316	-71.779	NaN	-71.31	-95.483	NaN	-95.181	-79.379	NaN	-79.386	-96.4	NaN	-97.387
0.42372	-86.314	NaN	-86.259	-71.778	NaN	-71.345	-95.472	NaN	-95.074	-79.377	NaN	-79.392	-96.39	NaN	-97.326
0.42422	-86.309	NaN	-86.195	-71.778	NaN	-71.358	-95.462	NaN	-95.021	-79.374	NaN	-79.392	-96.381	NaN	-97.377
0.42472	-86.304	NaN	-86.15	-71.777	NaN	-71.37	-95.451	NaN	-94.958	-79.372	NaN	-79.396	-96.371	NaN	-97.418
0.42522	-86.299	NaN	-85.944	-71.776	NaN	-71.408	-95.441	NaN	-94.96	-79.369	NaN	-79.409	-96.362	NaN	-97.517
0.42572	-86.294	NaN	-85.889	-71.775	NaN	-71.439	-95.43	NaN	-94.921	-79.367	NaN	-79.491	-96.353	NaN	-97.548
0.42621	-86.289	NaN	-85.894	-71.775	NaN	-71.485	-95.42	NaN	-94.961	-79.364	NaN	-79.483	-96.344	NaN	-98.149
0.42671	-86.284	NaN	-85.89	-71.774	NaN	-71.506	-95.409	NaN	-94.978	-79.362	NaN	-79.483	-96.334	NaN	-98.303
0.42721	-86.279	NaN	-85.995	-71.773	NaN	-71.53	-95.399	NaN	-94.935	-79.359	NaN	-79.494	-96.325	NaN	-98.323
0.42771	-86.275	NaN	-86.031	-71.773	NaN	-71.456	-95.388	NaN	-94.767	-79.357	NaN	-79.531	-96.316	NaN	-98.317
0.42821	-86.27	NaN	-86.032	-71.772	NaN	-71.429	-95.378	NaN	-94.744	-79.354	NaN	-79.526	-96.307	NaN	-98.06
0.42871	-86.265	NaN	-86.012	-71.771	NaN	-71.392	-95.367	NaN	-94.728	-79.352	NaN	-79.522	-96.298	NaN	-97.941
0.4292	-86.26	NaN	-85.976	-71.77	NaN	-71.39	-95.357	NaN	-94.738	-79.349	NaN	-79.521	-96.288	NaN	-97.894
0.4297	-86.255	NaN	-85.934	-71.77	NaN	-71.373	-95.347	NaN	-94.75	-79.347	NaN	-79.527	-96.279	NaN	-97.893
0.4302	-86.25	NaN	-85.984	-71.769	NaN	-71.422	-95.336	NaN	-94.789	-79.344	NaN	-79.489	-96.27	NaN	-97.949
0.4307	-86.245	NaN	-85.988	-71.768	NaN	-71.44	-95.326	NaN	-94.741	-79.342	NaN	-79.502	-96.261	NaN	-98.007
0.4312	-86.24	NaN	-85.979	-71.768	NaN	-71.448	-95.315	NaN	-94.726	-79.339	NaN	-79.485	-96.252	NaN	-97.995
0.43169	-86.235	NaN	-85.98	-71.767	NaN	-71.455	-95.305	NaN	-94.735	-79.337	NaN	-79.413	-96.243	NaN	-97.973
0.43219	-86.23	NaN	-85.974	-71.766	NaN	-71.384	-95.295	NaN	-94.81	-79.334	NaN	-79.287	-96.234	NaN	-97.989
0.43269	-86.225	NaN	-85.914	-71.765	NaN	-71.359	-95.284	NaN	-94.808	-79.332	NaN	-79.229	-96.226	NaN	-97.999
0.43319	-86.221	NaN	-85.911	-71.765	NaN	-71.262	-95.274	NaN	-94.892	-79.329	NaN	-79.215	-96.217	NaN	-98.071
0.43369	-86.216	NaN	-85.925	-71.764	NaN	-71.259	-95.264	NaN	-94.926	-79.327	NaN	-79.184	-96.208	NaN	-98.057
0.43419	-86.211	NaN	-85.937	-71.763	NaN	-71.24	-95.254	NaN	-94.932	-79.324	NaN	-79.135	-96.199	NaN	-98.047
0.43468	-86.206	NaN	-86.024	-71.763	NaN	-71.244	-95.243	NaN	-94.818	-79.322	NaN	-79.053	-96.19	NaN	-97.972
0.43518	-86.201	NaN	-86.101	-71.762	NaN	-71.281	-95.233	NaN	-94.799	-79.319	NaN	-79.014	-96.181	NaN	-97.903
0.43568	-86.196	NaN	-86.079	-71.761	NaN	-71.313	-95.223	NaN	-94.793	-79.317	NaN	-79.021	-96.173	NaN	-97.746
0.43618	-86.191	NaN	-86.114	-71.76	NaN	-71.332	-95.213	NaN	-94.793	-79.315	NaN	-79.057	-96.164	NaN	-97.377
0.43668	-86.187	NaN	-86.101	-71.76	NaN	-71.329	-95.202	NaN	-94.795	-79.312	NaN	-79.069	-96.155	NaN	-97.346
0.43717	-86.182	NaN	-86.048	-71.759	NaN	-71.361	-95.192	NaN	-94.883	-79.31	NaN	-79.08	-96.147	NaN	-97.305
0.43767	-86.177	NaN	-85.976	-71.758	NaN	-71.356	-95.182	NaN	-94.981	-79.307	NaN	-79.135	-96.138	NaN	-97.409
0.43817	-86.172	NaN	-85.924	-71.757	NaN	-71.355	-95.172	NaN	-94.981	-79.305	NaN	-79.17	-96.129	NaN	-97.552
0.43867	-86.167	NaN	-85.846	-71.757	NaN	-71.396	-95.162	NaN	-94.937	-79.302	NaN	-79.197	-96.121	NaN	-97.566
0.43917	-86.162	NaN	-85.818	-71.756	NaN	-71.445	-95.152	NaN	-94.865	-79.3	NaN	-79.191	-96.112	NaN	-97.526
0.43967	-86.157	NaN	-85.833	-71.755	NaN	-71.484	-95.141	NaN	-94.773	-79.297	NaN	-79.129	-96.104	NaN	-97.238
0.44016	-86.153	NaN	-85.867	-71.755	NaN	-71.563	-95.131	NaN	-94.628	-79.295	NaN	-79.057	-96.095	NaN	-97.038
0.44066	-86.148	NaN	-85.905	-71.754	NaN	-71.61	-95.121	NaN	-94.551	-79.292	NaN	-79.039	-96.087	NaN	-96.946
0.44116	-86.143	NaN	-85.917	-71.753	NaN	-71.643	-95.111	NaN	-94.541	-79.29	NaN	-79.037	-96.078	NaN	-96.872
0.44166	-86.138	NaN	-85.846	-71.752	NaN	-71.673	-95.101	NaN	-94.497	-79.287	NaN	-79.02	-96.07	NaN	-96.91
0.44216	-86.133	NaN	-85.737	-71.752	NaN	-71.683	-95.091	NaN	-94.442	-79.285	NaN	-79.077	-96.061	NaN	-96.786
0.44265	-86.129	NaN	-85.546	-71.751	NaN	-71.684	-95.081	NaN	-94.328	-79.283	NaN	-79.109	-96.053	NaN	-96.786
0.44315	-86.124	NaN	-85.34	-71.75	NaN	-71.683	-95.071	NaN	-94.154	-79.28	NaN	-79.116	-96.045	NaN	-96.786
0.44365	-86.119	NaN	-85.185	-71.75	NaN	-71.732	-95.061	NaN	-94.035	-79.278	NaN	-79.134	-96.036	NaN	-96.869
0.44415	-86.114	NaN	-85.093	-71.749	NaN	-71.736	-95.051	NaN	-94.062	-79.275	NaN	-79.167	-96.028	NaN	-96.985
0.44465	-86.109	NaN	-85.078	-71.748	NaN	-71.719	-95.041	NaN	-94.143	-79.273	NaN	-79.176	-96.02	NaN	-97.217
0.44515	-86.105	NaN	-85.165	-71.747	NaN	-71.706	-95.031	NaN	-94.226	-79.27	NaN	-79.202	-96.012	NaN	-97.557
0.44564	-86.1	NaN	-85.232	-71.747	NaN	-71.652	-95.021	NaN	-94.233	-79.268	NaN	-79.212	-96.003	NaN	-97.636
0.44614	-86.095	NaN	-85.234	-71.746	NaN	-71.652	-95.011	NaN	-94.233	-79.265	NaN	-79.251	-95.995	NaN	-97.636
0.44664	-86.09	NaN	-85.264	-71.745	NaN	-71.619	-95.001	NaN	-94.143	-79.263	NaN	-79.284	-95.987	NaN	-97.616
0.44714	-86.086	NaN	-85.389	-71.745	NaN	-71.556	-94.991	NaN	-93.955	-79.261	NaN	-79.262	-95.979	NaN	-97.485
0.44764	-86.081	NaN	-85.454	-71.744	NaN	-71.526	-94.981	NaN	-93.936	-79.258	NaN	-79.257	-95.971	NaN	-97.392
0.44813	-86.076	NaN	-85.516	-71.743	NaN	-71.462	-94.971	NaN	-93.841	-79.256	NaN	-79.193	-95.963	NaN	-97.326
0.44863	-86.071	NaN	-85.646	-71.742	NaN	-71.432	-94.961	NaN	-93.817	-79.253	NaN	-79.129	-95.955	NaN	-97.34
0.44913	-86.067	NaN	-85.68	-71.742	NaN	-71.431	-94.951	NaN	-93.769	-79.251	NaN	-79.063	-95.947	NaN	-97.429
0.44963	-86.062	NaN	-85.709	-71.741	NaN	-71.486	-94.941	NaN	-93.678	-79.248	NaN	-78.969	-95.938	NaN	-97.661
0.45013	-86.057	NaN	-85.796	-71.74	NaN	-71.459	-94.932	NaN	-93.623	-79.246	NaN	-78.905	-95.931	NaN	-97.583
0.45063	-86.052	NaN	-85.822	-71.74	NaN	-71.391	-94.922	NaN	-93.553	-79.244	NaN	-78.861	-95.923	NaN	-97.54
0.45112	-86.048	NaN	-85.828	-71.739	NaN	-71.358	-94.912	NaN	-93.547	-79.241	NaN	-78.807	-95.915	NaN	-97.561
0.45162	-86.043	NaN	-85.792	-71.738	NaN	-71.384	-94.902	NaN	-93.553	-79.239	NaN	-78.78	-95.907	NaN	-97.606
0.45212	-86.038	NaN	-85.76	-71.737	NaN	-71.322	-94.892	NaN	-93.612	-79.236	NaN	-78.817	-95.899	NaN	-97.558
0.45262	-86.033	NaN	-85.731	-71.737	NaN	-71.381	-94.882	NaN	-93.676	-79.234	NaN	-78.863	-95.891	NaN	-97.485
0.45312	-86.029	NaN	-85.681	-71.736	NaN	-71.432	-94.873	NaN	-93.687	-79.232	NaN	-78.931	-95.883	NaN	-97.291
0.45361	-86.024	NaN	-85.679	-71.735	NaN	-71.464	-94.863	NaN	-93.716	-79.229	NaN	-78.955	-95.875	NaN	-97.131
0.45411	-86.019	NaN	-85.679	-71.735	NaN	-71.528	-94.853	NaN	-93.736	-79.227	NaN	-79.014	-95.867	NaN	-96.86
0.45461	-86.015	NaN	-85.709	-71.734	NaN	-71.591	-94.843	NaN	-93.736	-79.224	NaN	-78.991	-95.86	NaN	-96.811
0.45511	-86.01	NaN	-85.801	-71.733	NaN	-71.626	-94.834	NaN	-93.75	-79.222	NaN	-79.02	-95.852	NaN	-96.635
0.45561	-86.005	NaN	-85.769	-71.732	NaN	-71.622	-94.824	NaN	-93.811	-79.219	NaN	-79.032	-95.844	NaN	-96.586
0.45611	-86.001	NaN	-85.72	-71.732	NaN	-71.642	-94.814	NaN	-93.817	-79.217	NaN	-79.084	-95.837	NaN	-96.498
0.4566	-85.996	NaN	-85.749	-71.731	NaN	-71.652	-94.804	NaN	-93.867	-79.215	NaN	-79.13	-95.829	NaN	-96.39
0.4571	-85.991	NaN	-85.72	-71.73	NaN	-71.702	-94.795	NaN	-93.821	-79.212	NaN	-79.149	-95.821	NaN	-96.365
0.4576	-85.986	NaN	-85.718	-71.73	NaN	-71.756	-94.785	NaN	-93.757	-79.21	NaN	-79.164	-95.814	NaN	-96.412
0.4581	-85.982	NaN	-85.712	-71.729	NaN	-71.804	-94.775	NaN	-93.786	-79.207	NaN	-79.195	-95.806	NaN	-96.478
0.4586	-85.977	NaN	-85.738	-71.728	NaN	-71.849	-94.766	NaN	-93.817	-79.205	NaN	-79.19	-95.798	NaN	-96.531
0.45909	-85.972	NaN	-85.699	-71.727	NaN	-71.905	-94.756	NaN	-93.737	-79.203	NaN	-79.142	-95.791	NaN	-96.531
0.45959	-85.968	NaN	-85.737	-71.727	NaN	-71.928	-94.746	NaN	-93.675	-79.2	NaN	-79.139	-95.783	NaN	-96.315
0.46009	-85.963	NaN	-85.705	-71.726	NaN	-71.943	-94.737	NaN	-93.634	-79.198	NaN	-79.154	-95.776	NaN	-95.888
0.46059	-85.959	NaN	-85.686	-71.725	NaN	-71.914	-94.727	NaN	-93.6	-79.196	NaN	-79.188	-95.768	NaN	-95.81
0.46109	-85.954	NaN	-85.57	-71.725	NaN	-71.899	-94.718	NaN	-93.576	-79.193	NaN	-79.228	-95.761	NaN	-95.819
0.46159	-85.949	NaN	-85.541	-71.724	NaN	-71.84	-94.708	NaN	-93.595	-79.191	NaN	-79.305	-95.753	NaN	-96.019
0.46208	-85.945	NaN	-85.532	-71.723	NaN	-71.796	-94.698	NaN	-93.624	-79.188	NaN	-79.327	-95.746	NaN	-96.206
0.46258	-85.94	NaN	-85.537	-71.722	NaN	-71.756	-94.689	NaN	-93.644	-79.186	NaN	-79.325	-95.739	NaN	-96.332
0.46308	-85.935	NaN	-85.535	-71.722	NaN	-71.729	-94.679	NaN	-93.588	-79.184	NaN	-79.256	-95.731	NaN	-96.44
0.46358	-85.931	NaN	-85.504	-71.721	NaN	-71.701	-94.67	NaN	-93.594	-79.181	NaN	-79.219	-95.724	NaN	-96.481
0.46408	-85.926	NaN	-85.48	-71.72	NaN	-71.712	-94.66	NaN	-93.533	-79.179	NaN	-79.193	-95.717	NaN	-96.531
0.46457	-85.921	NaN	-85.463	-71.72	NaN	-71.739	-94.651	NaN	-93.45	-79.176	NaN	-79.162	-95.709	NaN	-96.609
0.46507	-85.917	NaN	-85.461	-71.719	NaN	-71.718	-94.641	NaN	-93.466	-79.174	NaN	-79.144	-95.702	NaN	-96.57
0.46557	-85.912	NaN	-85.497	-71.718	NaN	-71.699	-94.632	NaN	-93.466	-79.172	NaN	-79.155	-95.695	NaN	-96.525
0.46607	-85.908	NaN	-85.541	-71.718	NaN	-71.696	-94.622	NaN	-93.423	-79.169	NaN	-79.129	-95.688	NaN	-96.339
0.46657	-85.903	NaN	-85.549	-71.717	NaN	-71.7	-94.613	NaN	-93.455	-79.167	NaN	-79.122	-95.68	NaN	-95.23
0.46707	-85.898	NaN	-85.505	-71.716	NaN	-71.682	-94.603	NaN	-93.513	-79.165	NaN	-79.081	-95.673	NaN	-95.163
0.46756	-85.894	NaN	-85.5	-71.715	NaN	-71.682	-94.594	NaN	-93.457	-79.162	NaN	-78.987	-95.666	NaN	-95.016
0.46806	-85.889	NaN	-85.525	-71.715	NaN	-71.653	-94.584	NaN	-93.486	-79.16	NaN	-78.951	-95.659	NaN	-94.934
0.46856	-85.885	NaN	-85.556	-71.714	NaN	-71.719	-94.575	NaN	-93.498	-79.158	NaN	-78.932	-95.652	NaN	-94.926
0.46906	-85.88	NaN	-85.62	-71.713	NaN	-71.793	-94.566	NaN	-93.505	-79.155	NaN	-78.839	-95.645	NaN	-94.92
0.46956	-85.876	NaN	-85.675	-71.713	NaN	-71.819	-94.556	NaN	-93.547	-79.153	NaN	-78.865	-95.638	NaN	-94.937
0.47005	-85.871	NaN	-85.694	-71.712	NaN	-71.806	-94.547	NaN	-93.655	-79.15	NaN	-78.886	-95.63	NaN	-95.08
0.47055	-85.866	NaN	-85.649	-71.711	NaN	-71.831	-94.537	NaN	-93.771	-79.148	NaN	-78.892	-95.623	NaN	-95.175
0.47105	-85.862	NaN	-85.612	-71.71	NaN	-71.808	-94.528	NaN	-93.815	-79.146	NaN	-78.926	-95.616	NaN	-95.302
0.47155	-85.857	NaN	-85.561	-71.71	NaN	-71.78	-94.519	NaN	-93.878	-79.143	NaN	-78.942	-95.609	NaN	-95.535
0.47205	-85.853	NaN	-85.519	-71.709	NaN	-71.773	-94.509	NaN	-93.875	-79.141	NaN	-78.991	-95.602	NaN	-95.553
0.47255	-85.848	NaN	-85.48	-71.708	NaN	-71.811	-94.5	NaN	-93.872	-79.139	NaN	-78.969	-95.596	NaN	-95.523
0.47304	-85.844	NaN	-85.387	-71.708	NaN	-71.85	-94.491	NaN	-93.84	-79.136	NaN	-78.906	-95.589	NaN	-95.607
0.47354	-85.839	NaN	-85.369	-71.707	NaN	-71.883	-94.481	NaN	-93.84	-79.134	NaN	-78.855	-95.582	NaN	-95.691
0.47404	-85.834	NaN	-85.372	-71.706	NaN	-71.926	-94.472	NaN	-93.836	-79.132	NaN	-78.811	-95.575	NaN	-95.691
0.47454	-85.83	NaN	-85.343	-71.705	NaN	-71.973	-94.463	NaN	-93.829	-79.129	NaN	-78.791	-95.568	NaN	-95.717
0.47504	-85.825	NaN	-85.313	-71.705	NaN	-71.994	-94.454	NaN	-93.724	-79.127	NaN	-78.757	-95.561	NaN	-95.761
0.47553	-85.821	NaN	-85.314	-71.704	NaN	-72.036	-94.444	NaN	-93.772	-79.125	NaN	-78.691	-95.554	NaN	-95.698
0.47603	-85.816	NaN	-85.307	-71.703	NaN	-72.051	-94.435	NaN	-93.826	-79.122	NaN	-78.61	-95.548	NaN	-95.613
0.47653	-85.812	NaN	-85.316	-71.703	NaN	-72.089	-94.426	NaN	-93.878	-79.12	NaN	-78.607	-95.541	NaN	-95.631
0.47703	-85.807	NaN	-85.317	-71.702	NaN	-72.113	-94.417	NaN	-93.852	-79.118	NaN	-78.678	-95.534	NaN	-95.714
0.47753	-85.803	NaN	-85.282	-71.701	NaN	-72.136	-94.407	NaN	-93.931	-79.115	NaN	-78.712	-95.527	NaN	-95.733
0.47803	-85.798	NaN	-85.267	-71.701	NaN	-72.166	-94.398	NaN	-93.91	-79.113	NaN	-78.693	-95.521	NaN	-95.823
0.47852	-85.794	NaN	-85.204	-71.7	NaN	-72.155	-94.389	NaN	-93.833	-79.111	NaN	-78.72	-95.514	NaN	-95.823
0.47902	-85.789	NaN	-85.173	-71.699	NaN	-72.12	-94.38	NaN	-93.676	-79.108	NaN	-78.732	-95.507	NaN	-95.776
0.47952	-85.785	NaN	-85.213	-71.698	NaN	-72.127	-94.371	NaN	-93.67	-79.106	NaN	-78.713	-95.501	NaN	-95.778
0.48002	-85.78	NaN	-85.242	-71.698	NaN	-72.16	-94.362	NaN	-93.606	-79.104	NaN	-78.715	-95.494	NaN	-95.704
0.48052	-85.776	NaN	-85.271	-71.697	NaN	-72.107	-94.352	NaN	-93.711	-79.101	NaN	-78.766	-95.487	NaN	-95.538
0.48101	-85.771	NaN	-85.281	-71.696	NaN	-72.073	-94.343	NaN	-93.821	-79.099	NaN	-78.79	-95.481	NaN	-95.379
0.48151	-85.767	NaN	-85.277	-71.696	NaN	-72.055	-94.334	NaN	-93.902	-79.097	NaN	-78.824	-95.474	NaN	-95.402
0.48201	-85.762	NaN	-85.263	-71.695	NaN	-72.04	-94.325	NaN	-93.959	-79.094	NaN	-78.823	-95.468	NaN	-95.393
0.48251	-85.758	NaN	-85.25	-71.694	NaN	-72.043	-94.316	NaN	-93.968	-79.092	NaN	-78.741	-95.461	NaN	-95.505
0.48301	-85.753	NaN	-85.232	-71.693	NaN	-72.057	-94.307	NaN	-93.92	-79.09	NaN	-78.666	-95.455	NaN	-95.695
0.48351	-85.749	NaN	-85.295	-71.693	NaN	-72.126	-94.298	NaN	-93.853	-79.087	NaN	-78.625	-95.448	NaN	-95.869
0.484	-85.745	NaN	-85.33	-71.692	NaN	-72.178	-94.289	NaN	-93.664	-79.085	NaN	-78.611	-95.442	NaN	-95.961
0.4845	-85.74	NaN	-85.355	-71.691	NaN	-72.218	-94.28	NaN	-93.644	-79.083	NaN	-78.594	-95.435	NaN	-96.011
0.485	-85.736	NaN	-85.347	-71.691	NaN	-72.195	-94.271	NaN	-93.482	-79.081	NaN	-78.565	-95.429	NaN	-95.993
0.4855	-85.731	NaN	-85.361	-71.69	NaN	-72.172	-94.262	NaN	-93.489	-79.078	NaN	-78.563	-95.422	NaN	-96.025
0.486	-85.727	NaN	-85.418	-71.689	NaN	-72.04	-94.253	NaN	-93.47	-79.076	NaN	-78.569	-95.416	NaN	-96.086
0.48649	-85.722	NaN	-85.424	-71.689	NaN	-71.966	-94.244	NaN	-93.513	-79.074	NaN	-78.586	-95.41	NaN	-96.075
0.48699	-85.718	NaN	-85.417	-71.688	NaN	-71.911	-94.235	NaN	-93.606	-79.071	NaN	-78.621	-95.403	NaN	-95.944
0.48749	-85.713	NaN	-85.434	-71.687	NaN	-71.911	-94.226	NaN	-93.667	-79.069	NaN	-78.673	-95.397	NaN	-96.075
0.48799	-85.709	NaN	-85.511	-71.686	NaN	-71.906	-94.217	NaN	-93.618	-79.067	NaN	-78.741	-95.391	NaN	-95.973
0.48849	-85.705	NaN	-85.5	-71.686	NaN	-71.921	-94.208	NaN	-93.592	-79.064	NaN	-78.756	-95.384	NaN	-95.849
0.48899	-85.7	NaN	-85.512	-71.685	NaN	-71.895	-94.199	NaN	-93.553	-79.062	NaN	-78.748	-95.378	NaN	-95.744
0.48948	-85.696	NaN	-85.519	-71.684	NaN	-71.92	-94.19	NaN	-93.545	-79.06	NaN	-78.778	-95.372	NaN	-95.656
0.48998	-85.691	NaN	-85.562	-71.684	NaN	-71.938	-94.181	NaN	-93.522	-79.058	NaN	-78.78	-95.366	NaN	-95.52
0.49048	-85.687	NaN	-85.519	-71.683	NaN	-71.934	-94.172	NaN	-93.508	-79.055	NaN	-78.755	-95.359	NaN	-95.288
0.49098	-85.682	NaN	-85.529	-71.682	NaN	-71.936	-94.163	NaN	-93.544	-79.053	NaN	-78.768	-95.353	NaN	-95.089
0.49148	-85.678	NaN	-85.571	-71.682	NaN	-71.941	-94.154	NaN	-93.518	-79.051	NaN	-78.775	-95.347	NaN	-94.816
0.49197	-85.674	NaN	-85.599	-71.681	NaN	-71.931	-94.145	NaN	-93.507	-79.048	NaN	-78.807	-95.341	NaN	-94.665
0.49247	-85.669	NaN	-85.648	-71.68	NaN	-71.883	-94.137	NaN	-93.565	-79.046	NaN	-78.811	-95.335	NaN	-94.665
0.49297	-85.665	NaN	-85.663	-71.679	NaN	-71.86	-94.128	NaN	-93.676	-79.044	NaN	-78.825	-95.329	NaN	-94.72
0.49347	-85.661	NaN	-85.66	-71.679	NaN	-71.831	-94.119	NaN	-93.739	-79.042	NaN	-78.823	-95.323	NaN	-94.79
0.49397	-85.656	NaN	-85.68	-71.678	NaN	-71.853	-94.11	NaN	-93.811	-79.039	NaN	-78.865	-95.317	NaN	-94.864
0.49447	-85.652	NaN	-85.596	-71.677	NaN	-71.903	-94.101	NaN	-93.812	-79.037	NaN	-78.761	-95.31	NaN	-95.166
0.49496	-85.647	NaN	-85.551	-71.677	NaN	-71.934	-94.092	NaN	-93.817	-79.035	NaN	-78.771	-95.304	NaN	-95.501
0.49546	-85.643	NaN	-85.545	-71.676	NaN	-71.938	-94.084	NaN	-93.806	-79.032	NaN	-78.743	-95.298	NaN	-95.617
0.49596	-85.639	NaN	-85.526	-71.675	NaN	-71.987	-94.075	NaN	-93.806	-79.03	NaN	-78.779	-95.292	NaN	-95.781
0.49646	-85.634	NaN	-85.525	-71.675	NaN	-71.992	-94.066	NaN	-93.778	-79.028	NaN	-78.797	-95.286	NaN	-95.814
0.49696	-85.63	NaN	-85.564	-71.674	NaN	-71.976	-94.057	NaN	-93.783	-79.026	NaN	-78.849	-95.28	NaN	-95.979
0.49745	-85.626	NaN	-85.575	-71.673	NaN	-71.888	-94.048	NaN	-93.846	-79.023	NaN	-78.852	-95.275	NaN	-96.04
0.49795	-85.621	NaN	-85.59	-71.672	NaN	-71.863	-94.04	NaN	-93.809	-79.021	NaN	-78.913	-95.269	NaN	-96.04
0.49845	-85.617	NaN	-85.638	-71.672	NaN	-71.857	-94.031	NaN	-93.731	-79.019	NaN	-78.969	-95.263	NaN	-95.913
0.49895	-85.613	NaN	-85.68	-71.671	NaN	-71.857	-94.022	NaN	-93.711	-79.017	NaN	-79.012	-95.257	NaN	-95.816
0.49945	-85.608	NaN	-85.722	-71.67	NaN	-71.816	-94.014	NaN	-93.696	-79.014	NaN	-79.036	-95.251	NaN	-95.801
0.49995	-85.604	NaN	-85.733	-71.67	NaN	-71.804	-94.005	NaN	-93.687	-79.012	NaN	-79.058	-95.245	NaN	-95.706
0.50044	-85.6	NaN	-85.687	-71.669	NaN	-71.764	-93.996	NaN	-93.699	-79.01	NaN	-79.052	-95.239	NaN	-95.706
0.50094	-85.595	NaN	-85.651	-71.668	NaN	-71.716	-93.987	NaN	-93.763	-79.007	NaN	-79.068	-95.233	NaN	-95.721
0.50144	-85.591	NaN	-85.576	-71.668	NaN	-71.644	-93.979	NaN	-93.806	-79.005	NaN	-79.049	-95.228	NaN	-95.683
0.50194	-85.587	NaN	-85.488	-71.667	NaN	-71.613	-93.97	NaN	-93.818	-79.003	NaN	-79.039	-95.222	NaN	-95.61
0.50244	-85.582	NaN	-85.412	-71.666	NaN	-71.592	-93.962	NaN	-93.82	-79.001	NaN	-79.03	-95.216	NaN	-95.627
0.50293	-85.578	NaN	-85.352	-71.665	NaN	-71.575	-93.953	NaN	-93.827	-78.998	NaN	-79.035	-95.21	NaN	-95.649
0.50343	-85.574	NaN	-85.299	-71.665	NaN	-71.598	-93.944	NaN	-93.914	-78.996	NaN	-79.029	-95.205	NaN	-95.604
0.50393	-85.569	NaN	-85.301	-71.664	NaN	-71.613	-93.936	NaN	-93.914	-78.994	NaN	-79.039	-95.199	NaN	-95.578
0.50443	-85.565	NaN	-85.306	-71.663	NaN	-71.648	-93.927	NaN	-93.914	-78.992	NaN	-79.048	-95.193	NaN	-95.526
0.50493	-85.561	NaN	-85.323	-71.663	NaN	-71.671	-93.918	NaN	-93.991	-78.989	NaN	-79.031	-95.188	NaN	-95.431
0.50543	-85.556	NaN	-85.338	-71.662	NaN	-71.716	-93.91	NaN	-94.09	-78.987	NaN	-79	-95.182	NaN	-95.39
0.50592	-85.552	NaN	-85.371	-71.661	NaN	-71.741	-93.901	NaN	-94.058	-78.985	NaN	-78.924	-95.176	NaN	-95.39
0.50642	-85.548	NaN	-85.387	-71.661	NaN	-71.722	-93.893	NaN	-94.068	-78.983	NaN	-78.871	-95.171	NaN	-95.396
0.50692	-85.544	NaN	-85.407	-71.66	NaN	-71.715	-93.884	NaN	-93.966	-78.981	NaN	-78.801	-95.165	NaN	-95.425
0.50742	-85.539	NaN	-85.435	-71.659	NaN	-71.673	-93.876	NaN	-93.923	-78.978	NaN	-78.768	-95.159	NaN	-95.418
0.50792	-85.535	NaN	-85.519	-71.658	NaN	-71.628	-93.867	NaN	-93.852	-78.976	NaN	-78.774	-95.154	NaN	-95.463
0.50841	-85.531	NaN	-85.538	-71.658	NaN	-71.464	-93.859	NaN	-93.896	-78.974	NaN	-78.823	-95.148	NaN	-95.469
0.50891	-85.526	NaN	-85.532	-71.657	NaN	-71.45	-93.85	NaN	-93.861	-78.972	NaN	-78.826	-95.143	NaN	-95.666
0.50941	-85.522	NaN	-85.596	-71.656	NaN	-71.421	-93.842	NaN	-93.896	-78.969	NaN	-78.839	-95.137	NaN	-95.697
0.50991	-85.518	NaN	-85.561	-71.656	NaN	-71.392	-93.833	NaN	-93.949	-78.967	NaN	-78.826	-95.132	NaN	-95.669
0.51041	-85.514	NaN	-85.524	-71.655	NaN	-71.398	-93.825	NaN	-93.782	-78.965	NaN	-78.817	-95.126	NaN	-95.662
0.51091	-85.509	NaN	-85.557	-71.654	NaN	-71.424	-93.816	NaN	-93.673	-78.963	NaN	-78.794	-95.121	NaN	-95.654
0.5114	-85.505	NaN	-85.574	-71.654	NaN	-71.416	-93.808	NaN	-93.673	-78.96	NaN	-78.85	-95.115	NaN	-95.686
0.5119	-85.501	NaN	-85.621	-71.653	NaN	-71.479	-93.799	NaN	-93.763	-78.958	NaN	-78.855	-95.11	NaN	-95.778
0.5124	-85.497	NaN	-85.668	-71.652	NaN	-71.538	-93.791	NaN	-94.036	-78.956	NaN	-78.842	-95.105	NaN	-95.747
0.5129	-85.492	NaN	-85.714	-71.651	NaN	-71.563	-93.782	NaN	-94.137	-78.954	NaN	-78.81	-95.099	NaN	-95.837
0.5134	-85.488	NaN	-85.728	-71.651	NaN	-71.575	-93.774	NaN	-94.125	-78.952	NaN	-78.851	-95.094	NaN	-95.765
0.51389	-85.484	NaN	-85.724	-71.65	NaN	-71.575	-93.766	NaN	-93.972	-78.949	NaN	-78.846	-95.088	NaN	-95.709
0.51439	-85.48	NaN	-85.626	-71.649	NaN	-71.433	-93.757	NaN	-93.821	-78.947	NaN	-78.874	-95.083	NaN	-95.805
0.51489	-85.476	NaN	-85.499	-71.649	NaN	-71.416	-93.749	NaN	-93.569	-78.945	NaN	-78.976	-95.078	NaN	-95.846
0.51539	-85.471	NaN	-85.273	-71.648	NaN	-71.395	-93.74	NaN	-93.443	-78.943	NaN	-79.016	-95.072	NaN	-95.846
0.51589	-85.467	NaN	-85.156	-71.647	NaN	-71.33	-93.732	NaN	-93.383	-78.94	NaN	-78.968	-95.067	NaN	-95.884
0.51639	-85.463	NaN	-85.159	-71.647	NaN	-71.295	-93.724	NaN	-93.089	-78.938	NaN	-78.974	-95.062	NaN	-95.964
0.51688	-85.459	NaN	-85.196	-71.646	NaN	-71.287	-93.715	NaN	-92.939	-78.936	NaN	-78.951	-95.057	NaN	-95.955
0.51738	-85.455	NaN	-85.253	-71.645	NaN	-71.319	-93.707	NaN	-92.802	-78.934	NaN	-78.878	-95.051	NaN	-95.997
0.51788	-85.45	NaN	-85.258	-71.645	NaN	-71.356	-93.699	NaN	-92.738	-78.932	NaN	-78.852	-95.046	NaN	-96.068
0.51838	-85.446	NaN	-85.247	-71.644	NaN	-71.369	-93.69	NaN	-92.692	-78.929	NaN	-78.831	-95.041	NaN	-96.255
0.51888	-85.442	NaN	-85.249	-71.643	NaN	-71.387	-93.682	NaN	-92.639	-78.927	NaN	-78.851	-95.036	NaN	-96.536
0.51937	-85.438	NaN	-85.261	-71.642	NaN	-71.383	-93.674	NaN	-92.61	-78.925	NaN	-78.818	-95.031	NaN	-96.451
0.51987	-85.434	NaN	-85.284	-71.642	NaN	-71.386	-93.666	NaN	-92.346	-78.923	NaN	-78.846	-95.025	NaN	-96.495
0.52037	-85.429	NaN	-85.338	-71.641	NaN	-71.337	-93.657	NaN	-92.224	-78.921	NaN	-78.847	-95.02	NaN	-96.463
0.52087	-85.425	NaN	-85.364	-71.64	NaN	-71.351	-93.649	NaN	-92.178	-78.918	NaN	-78.851	-95.015	NaN	-96.463
0.52137	-85.421	NaN	-85.429	-71.64	NaN	-71.329	-93.641	NaN	-92.201	-78.916	NaN	-78.886	-95.01	NaN	-96.478
0.52187	-85.417	NaN	-85.432	-71.639	NaN	-71.316	-93.633	NaN	-92.358	-78.914	NaN	-78.894	-95.005	NaN	-96.527
0.52236	-85.413	NaN	-85.456	-71.638	NaN	-71.331	-93.624	NaN	-92.408	-78.912	NaN	-78.877	-95	NaN	-96.489
0.52286	-85.409	NaN	-85.471	-71.638	NaN	-71.379	-93.616	NaN	-92.478	-78.91	NaN	-78.837	-94.995	NaN	-96.509
0.52336	-85.404	NaN	-85.476	-71.637	NaN	-71.43	-93.608	NaN	-92.53	-78.908	NaN	-78.82	-94.99	NaN	-96.402
0.52386	-85.4	NaN	-85.457	-71.636	NaN	-71.471	-93.6	NaN	-92.565	-78.905	NaN	-78.791	-94.985	NaN	-96.388
0.52436	-85.396	NaN	-85.325	-71.636	NaN	-71.503	-93.592	NaN	-92.52	-78.903	NaN	-78.794	-94.98	NaN	-96.478
0.52485	-85.392	NaN	-85.219	-71.635	NaN	-71.53	-93.583	NaN	-92.498	-78.901	NaN	-78.811	-94.975	NaN	-96.478
0.52535	-85.388	NaN	-85.148	-71.634	NaN	-71.535	-93.575	NaN	-92.497	-78.899	NaN	-78.846	-94.97	NaN	-96.46
0.52585	-85.384	NaN	-85.02	-71.633	NaN	-71.629	-93.567	NaN	-92.497	-78.897	NaN	-78.873	-94.965	NaN	-96.49
0.52635	-85.38	NaN	-84.997	-71.633	NaN	-71.702	-93.559	NaN	-92.578	-78.894	NaN	-78.925	-94.96	NaN	-96.49
0.52685	-85.375	NaN	-85.082	-71.632	NaN	-71.769	-93.551	NaN	-92.701	-78.892	NaN	-78.904	-94.955	NaN	-96.458
0.52735	-85.371	NaN	-85.099	-71.631	NaN	-71.817	-93.543	NaN	-92.852	-78.89	NaN	-78.887	-94.95	NaN	-96.487
0.52784	-85.367	NaN	-85.086	-71.631	NaN	-71.841	-93.535	NaN	-92.877	-78.888	NaN	-78.836	-94.945	NaN	-96.525
0.52834	-85.363	NaN	-85.099	-71.63	NaN	-71.854	-93.527	NaN	-92.877	-78.886	NaN	-78.75	-94.94	NaN	-96.712
0.52884	-85.359	NaN	-85.126	-71.629	NaN	-71.859	-93.518	NaN	-92.98	-78.884	NaN	-78.655	-94.935	NaN	-96.861
0.52934	-85.355	NaN	-85.149	-71.629	NaN	-71.843	-93.51	NaN	-93.264	-78.881	NaN	-78.638	-94.93	NaN	-97.067
0.52984	-85.351	NaN	-85.236	-71.628	NaN	-71.826	-93.502	NaN	-93.342	-78.879	NaN	-78.62	-94.925	NaN	-97.264
0.53033	-85.347	NaN	-85.294	-71.627	NaN	-71.825	-93.494	NaN	-93.342	-78.877	NaN	-78.651	-94.921	NaN	-97.264
0.53083	-85.342	NaN	-85.336	-71.627	NaN	-71.797	-93.486	NaN	-93.318	-78.875	NaN	-78.685	-94.916	NaN	-97.024
0.53133	-85.338	NaN	-85.344	-71.626	NaN	-71.738	-93.478	NaN	-93.215	-78.873	NaN	-78.733	-94.911	NaN	-96.475
0.53183	-85.334	NaN	-85.265	-71.625	NaN	-71.727	-93.47	NaN	-93.078	-78.871	NaN	-78.774	-94.906	NaN	-96.292
0.53233	-85.33	NaN	-85.232	-71.624	NaN	-71.612	-93.462	NaN	-93.083	-78.868	NaN	-78.795	-94.901	NaN	-96.289
0.53283	-85.326	NaN	-85.232	-71.624	NaN	-71.613	-93.454	NaN	-93.074	-78.866	NaN	-78.778	-94.897	NaN	-96.318
0.53332	-85.322	NaN	-85.19	-71.623	NaN	-71.606	-93.446	NaN	-93.074	-78.864	NaN	-78.784	-94.892	NaN	-96.306
0.53382	-85.318	NaN	-85.161	-71.622	NaN	-71.577	-93.438	NaN	-93.046	-78.862	NaN	-78.774	-94.887	NaN	-96.386
0.53432	-85.314	NaN	-85.186	-71.622	NaN	-71.447	-93.43	NaN	-93.066	-78.86	NaN	-78.752	-94.882	NaN	-96.464
0.53482	-85.31	NaN	-85.117	-71.621	NaN	-71.332	-93.422	NaN	-93.008	-78.858	NaN	-78.693	-94.878	NaN	-96.432
0.53532	-85.306	NaN	-84.985	-71.62	NaN	-71.276	-93.414	NaN	-92.944	-78.855	NaN	-78.669	-94.873	NaN	-96.414
0.53581	-85.302	NaN	-84.92	-71.62	NaN	-71.265	-93.406	NaN	-92.805	-78.853	NaN	-78.614	-94.868	NaN	-96.226
0.53631	-85.298	NaN	-84.872	-71.619	NaN	-71.26	-93.398	NaN	-92.43	-78.851	NaN	-78.611	-94.864	NaN	-95.938
0.53681	-85.293	NaN	-84.908	-71.618	NaN	-71.252	-93.39	NaN	-92.231	-78.849	NaN	-78.593	-94.859	NaN	-95.92
0.53731	-85.289	NaN	-84.956	-71.618	NaN	-71.276	-93.382	NaN	-92.231	-78.847	NaN	-78.615	-94.854	NaN	-95.92
0.53781	-85.285	NaN	-84.988	-71.617	NaN	-71.3	-93.375	NaN	-92.25	-78.845	NaN	-78.623	-94.85	NaN	-95.831
0.53831	-85.281	NaN	-84.972	-71.616	NaN	-71.307	-93.367	NaN	-92.254	-78.843	NaN	-78.621	-94.845	NaN	-95.804
0.5388	-85.277	NaN	-84.985	-71.616	NaN	-71.321	-93.359	NaN	-92.271	-78.84	NaN	-78.645	-94.841	NaN	-95.672
0.5393	-85.273	NaN	-85.025	-71.615	NaN	-71.351	-93.351	NaN	-92.315	-78.838	NaN	-78.656	-94.836	NaN	-95.584
0.5398	-85.269	NaN	-85.108	-71.614	NaN	-71.43	-93.343	NaN	-92.321	-78.836	NaN	-78.663	-94.831	NaN	-95.564
0.5403	-85.265	NaN	-85.235	-71.613	NaN	-71.451	-93.335	NaN	-92.382	-78.834	NaN	-78.691	-94.827	NaN	-95.514
0.5408	-85.261	NaN	-85.323	-71.613	NaN	-71.481	-93.327	NaN	-92.416	-78.832	NaN	-78.709	-94.822	NaN	-95.707
0.54129	-85.257	NaN	-85.41	-71.612	NaN	-71.543	-93.319	NaN	-92.465	-78.83	NaN	-78.762	-94.818	NaN	-95.833
0.54179	-85.253	NaN	-85.346	-71.611	NaN	-71.6	-93.312	NaN	-92.585	-78.828	NaN	-78.787	-94.813	NaN	-95.883
0.54229	-85.249	NaN	-85.316	-71.611	NaN	-71.615	-93.304	NaN	-92.64	-78.826	NaN	-78.803	-94.809	NaN	-95.886
0.54279	-85.245	NaN	-85.265	-71.61	NaN	-71.68	-93.296	NaN	-92.691	-78.823	NaN	-78.819	-94.804	NaN	-95.851
0.54329	-85.241	NaN	-85.09	-71.609	NaN	-71.72	-93.288	NaN	-92.802	-78.821	NaN	-78.821	-94.8	NaN	-95.326
0.54379	-85.237	NaN	-84.954	-71.609	NaN	-71.734	-93.28	NaN	-92.852	-78.819	NaN	-78.815	-94.795	NaN	-95.227
0.54428	-85.233	NaN	-84.969	-71.608	NaN	-71.699	-93.273	NaN	-92.929	-78.817	NaN	-78.824	-94.791	NaN	-95.207
0.54478	-85.229	NaN	-84.93	-71.607	NaN	-71.661	-93.265	NaN	-93.054	-78.815	NaN	-78.832	-94.787	NaN	-95.25
0.54528	-85.225	NaN	-84.947	-71.607	NaN	-71.655	-93.257	NaN	-93.144	-78.813	NaN	-78.834	-94.782	NaN	-95.314
0.54578	-85.221	NaN	-84.997	-71.606	NaN	-71.672	-93.249	NaN	-93.228	-78.811	NaN	-78.804	-94.778	NaN	-95.411
0.54628	-85.217	NaN	-85.002	-71.605	NaN	-71.778	-93.242	NaN	-93.426	-78.809	NaN	-78.759	-94.773	NaN	-95.314
0.54677	-85.213	NaN	-85.029	-71.605	NaN	-71.841	-93.234	NaN	-93.438	-78.806	NaN	-78.749	-94.769	NaN	-95.346
0.54727	-85.209	NaN	-85.082	-71.604	NaN	-71.863	-93.226	NaN	-93.342	-78.804	NaN	-78.714	-94.765	NaN	-95.305
0.54777	-85.205	NaN	-85.117	-71.603	NaN	-71.855	-93.218	NaN	-93.374	-78.802	NaN	-78.675	-94.76	NaN	-95.297
0.54827	-85.201	NaN	-85.127	-71.602	NaN	-71.861	-93.211	NaN	-93.342	-78.8	NaN	-78.71	-94.756	NaN	-95.184
0.54877	-85.197	NaN	-85.117	-71.602	NaN	-71.851	-93.203	NaN	-93.225	-78.798	NaN	-78.734	-94.752	NaN	-95.184
0.54927	-85.193	NaN	-85.092	-71.601	NaN	-71.851	-93.195	NaN	-93.212	-78.796	NaN	-78.75	-94.747	NaN	-95.17
0.54976	-85.189	NaN	-85.113	-71.6	NaN	-71.847	-93.188	NaN	-93.29	-78.794	NaN	-78.749	-94.743	NaN	-95.17
0.55026	-85.185	NaN	-85.099	-71.6	NaN	-71.861	-93.18	NaN	-93.423	-78.792	NaN	-78.76	-94.739	NaN	-95.228
0.55076	-85.181	NaN	-85.061	-71.599	NaN	-71.868	-93.172	NaN	-93.453	-78.79	NaN	-78.732	-94.735	NaN	-95.456
0.55126	-85.177	NaN	-85.03	-71.598	NaN	-71.86	-93.165	NaN	-93.51	-78.787	NaN	-78.739	-94.73	NaN	-95.616
0.55176	-85.173	NaN	-84.993	-71.598	NaN	-71.86	-93.157	NaN	-93.537	-78.785	NaN	-78.77	-94.726	NaN	-95.746
0.55225	-85.169	NaN	-84.963	-71.597	NaN	-71.88	-93.15	NaN	-93.411	-78.783	NaN	-78.797	-94.722	NaN	-95.958
0.55275	-85.165	NaN	-84.949	-71.596	NaN	-71.904	-93.142	NaN	-93.315	-78.781	NaN	-78.832	-94.718	NaN	-96.081
0.55325	-85.162	NaN	-84.964	-71.596	NaN	-71.901	-93.134	NaN	-93.315	-78.779	NaN	-78.9	-94.714	NaN	-96.04
0.55375	-85.158	NaN	-84.975	-71.595	NaN	-71.925	-93.127	NaN	-93.197	-78.777	NaN	-78.913	-94.709	NaN	-95.95
0.55425	-85.154	NaN	-84.956	-71.594	NaN	-71.931	-93.119	NaN	-93.15	-78.775	NaN	-78.919	-94.705	NaN	-95.642
0.55475	-85.15	NaN	-84.971	-71.594	NaN	-71.907	-93.112	NaN	-93.15	-78.773	NaN	-78.942	-94.701	NaN	-95.349
0.55524	-85.146	NaN	-84.993	-71.593	NaN	-71.873	-93.104	NaN	-93.22	-78.771	NaN	-78.901	-94.697	NaN	-95.225
0.55574	-85.142	NaN	-84.99	-71.592	NaN	-71.86	-93.096	NaN	-93.196	-78.769	NaN	-78.858	-94.693	NaN	-95.23
0.55624	-85.138	NaN	-85.042	-71.592	NaN	-71.869	-93.089	NaN	-93.193	-78.766	NaN	-78.813	-94.689	NaN	-95.253
0.55674	-85.134	NaN	-85.18	-71.591	NaN	-71.847	-93.081	NaN	-93.122	-78.764	NaN	-78.773	-94.685	NaN	-95.54
0.55724	-85.13	NaN	-85.213	-71.59	NaN	-71.902	-93.074	NaN	-93.084	-78.762	NaN	-78.766	-94.681	NaN	-95.717
0.55773	-85.126	NaN	-85.257	-71.589	NaN	-71.929	-93.066	NaN	-93.084	-78.76	NaN	-78.808	-94.676	NaN	-95.738
0.55823	-85.122	NaN	-85.259	-71.589	NaN	-71.954	-93.059	NaN	-93.046	-78.758	NaN	-78.843	-94.672	NaN	-95.736
0.55873	-85.118	NaN	-85.275	-71.588	NaN	-71.947	-93.051	NaN	-93.005	-78.756	NaN	-78.865	-94.668	NaN	-95.74
0.55923	-85.115	NaN	-85.287	-71.587	NaN	-71.92	-93.044	NaN	-92.997	-78.754	NaN	-78.866	-94.664	NaN	-95.602
0.55973	-85.111	NaN	-85.386	-71.587	NaN	-71.836	-93.036	NaN	-93.026	-78.752	NaN	-78.864	-94.66	NaN	-95.547
0.56023	-85.107	NaN	-85.392	-71.586	NaN	-71.735	-93.029	NaN	-93.212	-78.75	NaN	-78.865	-94.656	NaN	-95.425
0.56072	-85.103	NaN	-85.393	-71.585	NaN	-71.661	-93.021	NaN	-93.228	-78.748	NaN	-78.831	-94.652	NaN	-95.425
0.56122	-85.099	NaN	-85.393	-71.585	NaN	-71.579	-93.014	NaN	-93.228	-78.746	NaN	-78.833	-94.648	NaN	-95.266
0.56172	-85.095	NaN	-85.335	-71.584	NaN	-71.584	-93.006	NaN	-93.228	-78.744	NaN	-78.818	-94.644	NaN	-95.266
0.56222	-85.091	NaN	-85.247	-71.583	NaN	-71.59	-92.999	NaN	-93.225	-78.741	NaN	-78.833	-94.64	NaN	-95.273
0.56272	-85.087	NaN	-85.221	-71.583	NaN	-71.633	-92.992	NaN	-93.168	-78.739	NaN	-78.84	-94.636	NaN	-95.312
0.56321	-85.083	NaN	-85.157	-71.582	NaN	-71.722	-92.984	NaN	-93.176	-78.737	NaN	-78.842	-94.632	NaN	-95.312
0.56371	-85.08	NaN	-85.134	-71.581	NaN	-71.786	-92.977	NaN	-93.235	-78.735	NaN	-78.844	-94.628	NaN	-95.472
0.56421	-85.076	NaN	-85.163	-71.581	NaN	-71.831	-92.969	NaN	-93.29	-78.733	NaN	-78.861	-94.625	NaN	-95.355
0.56471	-85.072	NaN	-85.141	-71.58	NaN	-71.891	-92.962	NaN	-93.458	-78.731	NaN	-78.879	-94.621	NaN	-95.288
0.56521	-85.068	NaN	-85.167	-71.579	NaN	-71.916	-92.955	NaN	-93.519	-78.729	NaN	-78.836	-94.617	NaN	-95.373
0.56571	-85.064	NaN	-85.185	-71.579	NaN	-71.946	-92.947	NaN	-93.426	-78.727	NaN	-78.863	-94.613	NaN	-95.212
0.5662	-85.06	NaN	-85.135	-71.578	NaN	-71.944	-92.94	NaN	-93.389	-78.725	NaN	-78.853	-94.609	NaN	-95.05
0.5667	-85.056	NaN	-85.086	-71.577	NaN	-71.885	-92.932	NaN	-93.373	-78.723	NaN	-78.845	-94.605	NaN	-94.835
0.5672	-85.053	NaN	-85.076	-71.577	NaN	-71.861	-92.925	NaN	-93.418	-78.721	NaN	-78.779	-94.601	NaN	-94.764
0.5677	-85.049	NaN	-85.088	-71.576	NaN	-71.848	-92.918	NaN	-93.432	-78.719	NaN	-78.711	-94.598	NaN	-94.742
0.5682	-85.045	NaN	-85.064	-71.575	NaN	-71.845	-92.91	NaN	-93.519	-78.717	NaN	-78.669	-94.594	NaN	-94.797
0.56869	-85.041	NaN	-84.976	-71.575	NaN	-71.857	-92.903	NaN	-93.508	-78.715	NaN	-78.646	-94.59	NaN	-94.894
0.56919	-85.037	NaN	-84.931	-71.574	NaN	-71.87	-92.896	NaN	-93.56	-78.713	NaN	-78.586	-94.586	NaN	-95.045
0.56969	-85.033	NaN	-84.845	-71.573	NaN	-71.879	-92.889	NaN	-93.566	-78.711	NaN	-78.575	-94.582	NaN	-95.038
0.57019	-85.03	NaN	-84.812	-71.572	NaN	-71.901	-92.881	NaN	-93.55	-78.709	NaN	-78.633	-94.579	NaN	-95.045
0.57069	-85.026	NaN	-84.803	-71.572	NaN	-71.926	-92.874	NaN	-93.55	-78.706	NaN	-78.638	-94.575	NaN	-95.114
0.57119	-85.022	NaN	-84.798	-71.571	NaN	-71.895	-92.867	NaN	-93.577	-78.704	NaN	-78.615	-94.571	NaN	-95.109
0.57168	-85.018	NaN	-84.809	-71.57	NaN	-71.827	-92.859	NaN	-93.586	-78.702	NaN	-78.515	-94.567	NaN	-95.117
0.57218	-85.014	NaN	-84.859	-71.57	NaN	-71.731	-92.852	NaN	-93.56	-78.7	NaN	-78.489	-94.564	NaN	-95.144
0.57268	-85.011	NaN	-84.884	-71.569	NaN	-71.673	-92.845	NaN	-93.611	-78.698	NaN	-78.475	-94.56	NaN	-95.154
0.57318	-85.007	NaN	-84.914	-71.568	NaN	-71.656	-92.838	NaN	-93.562	-78.696	NaN	-78.535	-94.556	NaN	-94.993
0.57368	-85.003	NaN	-85.033	-71.568	NaN	-71.68	-92.831	NaN	-93.403	-78.694	NaN	-78.612	-94.552	NaN	-94.996
0.57417	-84.999	NaN	-85.04	-71.567	NaN	-71.689	-92.823	NaN	-93.331	-78.692	NaN	-78.655	-94.549	NaN	-94.996
0.57467	-84.995	NaN	-85.007	-71.566	NaN	-71.709	-92.816	NaN	-93.254	-78.69	NaN	-78.708	-94.545	NaN	-95.007
0.57517	-84.992	NaN	-84.991	-71.566	NaN	-71.77	-92.809	NaN	-93.249	-78.688	NaN	-78.694	-94.541	NaN	-94.951
0.57567	-84.988	NaN	-84.94	-71.565	NaN	-71.799	-92.802	NaN	-93.264	-78.686	NaN	-78.647	-94.538	NaN	-94.987
0.57617	-84.984	NaN	-84.913	-71.564	NaN	-71.818	-92.795	NaN	-93.356	-78.684	NaN	-78.583	-94.534	NaN	-95.007
0.57667	-84.98	NaN	-84.892	-71.564	NaN	-71.869	-92.787	NaN	-93.418	-78.682	NaN	-78.516	-94.531	NaN	-95.035
0.57716	-84.976	NaN	-84.888	-71.563	NaN	-71.912	-92.78	NaN	-93.479	-78.68	NaN	-78.521	-94.527	NaN	-95.038
0.57766	-84.973	NaN	-84.901	-71.562	NaN	-71.944	-92.773	NaN	-93.502	-78.678	NaN	-78.513	-94.523	NaN	-95.167
0.57816	-84.969	NaN	-84.915	-71.562	NaN	-72.002	-92.766	NaN	-93.499	-78.676	NaN	-78.578	-94.52	NaN	-95.207
0.57866	-84.965	NaN	-84.956	-71.561	NaN	-72.028	-92.759	NaN	-93.569	-78.674	NaN	-78.583	-94.516	NaN	-95.209
0.57916	-84.961	NaN	-84.997	-71.56	NaN	-72.019	-92.752	NaN	-93.611	-78.672	NaN	-78.604	-94.513	NaN	-95.202
0.57965	-84.958	NaN	-85.015	-71.56	NaN	-71.997	-92.745	NaN	-93.664	-78.67	NaN	-78.635	-94.509	NaN	-95.08
0.58015	-84.954	NaN	-84.963	-71.559	NaN	-71.964	-92.737	NaN	-93.672	-78.668	NaN	-78.669	-94.506	NaN	-95.041
0.58065	-84.95	NaN	-84.949	-71.558	NaN	-71.886	-92.73	NaN	-93.768	-78.666	NaN	-78.707	-94.502	NaN	-95.038
0.58115	-84.946	NaN	-84.907	-71.558	NaN	-71.875	-92.723	NaN	-93.83	-78.664	NaN	-78.752	-94.499	NaN	-95.08
0.58165	-84.943	NaN	-84.877	-71.557	NaN	-71.823	-92.716	NaN	-93.841	-78.662	NaN	-78.794	-94.495	NaN	-95.178
0.58215	-84.939	NaN	-84.898	-71.556	NaN	-71.777	-92.709	NaN	-93.817	-78.66	NaN	-78.788	-94.492	NaN	-95.166
0.58264	-84.935	NaN	-84.916	-71.556	NaN	-71.768	-92.702	NaN	-93.733	-78.658	NaN	-78.824	-94.488	NaN	-95.06
0.58314	-84.931	NaN	-84.972	-71.555	NaN	-71.763	-92.695	NaN	-93.719	-78.656	NaN	-78.857	-94.485	NaN	-94.993
0.58364	-84.928	NaN	-84.972	-71.554	NaN	-71.789	-92.688	NaN	-93.702	-78.654	NaN	-78.863	-94.481	NaN	-94.88
0.58414	-84.924	NaN	-84.991	-71.554	NaN	-71.825	-92.681	NaN	-93.702	-78.652	NaN	-78.842	-94.478	NaN	-94.841
0.58464	-84.92	NaN	-84.95	-71.553	NaN	-71.83	-92.674	NaN	-93.754	-78.65	NaN	-78.678	-94.474	NaN	-94.757
0.58513	-84.916	NaN	-84.916	-71.552	NaN	-71.799	-92.667	NaN	-93.791	-78.648	NaN	-78.586	-94.471	NaN	-94.124
0.58563	-84.913	NaN	-84.8	-71.552	NaN	-71.776	-92.66	NaN	-93.71	-78.646	NaN	-78.582	-94.467	NaN	-93.976
0.58613	-84.909	NaN	-84.641	-71.551	NaN	-71.733	-92.653	NaN	-93.569	-78.644	NaN	-78.583	-94.464	NaN	-93.916
0.58663	-84.905	NaN	-84.513	-71.55	NaN	-71.651	-92.646	NaN	-93.411	-78.642	NaN	-78.657	-94.461	NaN	-93.948
0.58713	-84.902	NaN	-84.401	-71.549	NaN	-71.539	-92.639	NaN	-93.26	-78.64	NaN	-78.688	-94.457	NaN	-94.032
0.58763	-84.898	NaN	-84.13	-71.549	NaN	-71.48	-92.632	NaN	-92.848	-78.638	NaN	-78.724	-94.454	NaN	-94.2
0.58812	-84.894	NaN	-84.153	-71.548	NaN	-71.452	-92.625	NaN	-92.115	-78.636	NaN	-78.789	-94.45	NaN	-94.293
0.58862	-84.89	NaN	-84.167	-71.547	NaN	-71.485	-92.618	NaN	-91.897	-78.634	NaN	-78.772	-94.447	NaN	-94.415
0.58912	-84.887	NaN	-84.266	-71.547	NaN	-71.533	-92.611	NaN	-91.897	-78.632	NaN	-78.773	-94.444	NaN	-94.415
0.58962	-84.883	NaN	-84.309	-71.546	NaN	-71.555	-92.604	NaN	-91.828	-78.63	NaN	-78.797	-94.44	NaN	-94.499
0.59012	-84.879	NaN	-84.4	-71.545	NaN	-71.543	-92.597	NaN	-91.828	-78.628	NaN	-78.801	-94.437	NaN	-94.513
0.59061	-84.876	NaN	-84.421	-71.545	NaN	-71.558	-92.59	NaN	-91.731	-78.626	NaN	-78.849	-94.434	NaN	-94.513
0.59111	-84.872	NaN	-84.402	-71.544	NaN	-71.535	-92.583	NaN	-91.522	-78.624	NaN	-78.9	-94.43	NaN	-94.409
0.59161	-84.868	NaN	-84.383	-71.543	NaN	-71.486	-92.576	NaN	-91.072	-78.622	NaN	-78.902	-94.427	NaN	-94.533
0.59211	-84.865	NaN	-84.325	-71.543	NaN	-71.428	-92.57	NaN	-90.994	-78.62	NaN	-78.891	-94.424	NaN	-94.339
0.59261	-84.861	NaN	-84.321	-71.542	NaN	-71.477	-92.563	NaN	-90.795	-78.618	NaN	-78.881	-94.42	NaN	-94.311
0.59311	-84.857	NaN	-84.345	-71.541	NaN	-71.517	-92.556	NaN	-90.818	-78.616	NaN	-78.88	-94.417	NaN	-94.291
0.5936	-84.854	NaN	-84.404	-71.541	NaN	-71.525	-92.549	NaN	-90.997	-78.614	NaN	-78.881	-94.414	NaN	-94.224
0.5941	-84.85	NaN	-84.476	-71.54	NaN	-71.583	-92.542	NaN	-91.098	-78.612	NaN	-78.859	-94.411	NaN	-94.215
0.5946	-84.846	NaN	-84.566	-71.539	NaN	-71.614	-92.535	NaN	-91.163	-78.61	NaN	-78.85	-94.407	NaN	-94.311
0.5951	-84.843	NaN	-84.564	-71.539	NaN	-71.65	-92.528	NaN	-91.552	-78.608	NaN	-78.867	-94.404	NaN	-94.412
0.5956	-84.839	NaN	-84.582	-71.538	NaN	-71.656	-92.522	NaN	-91.778	-78.606	NaN	-78.856	-94.401	NaN	-94.543
0.59609	-84.835	NaN	-84.579	-71.537	NaN	-71.715	-92.515	NaN	-91.975	-78.604	NaN	-78.894	-94.398	NaN	-94.626
0.59659	-84.832	NaN	-84.594	-71.537	NaN	-71.715	-92.508	NaN	-92.065	-78.602	NaN	-78.95	-94.395	NaN	-94.636
0.59709	-84.828	NaN	-84.602	-71.536	NaN	-71.732	-92.501	NaN	-92.144	-78.6	NaN	-78.952	-94.391	NaN	-94.565
0.59759	-84.824	NaN	-84.599	-71.535	NaN	-71.763	-92.494	NaN	-92.268	-78.598	NaN	-78.936	-94.388	NaN	-94.545
0.59809	-84.821	NaN	-84.597	-71.535	NaN	-71.805	-92.487	NaN	-92.422	-78.596	NaN	-78.932	-94.385	NaN	-94.476
0.59859	-84.817	NaN	-84.571	-71.534	NaN	-71.812	-92.481	NaN	-92.669	-78.594	NaN	-78.902	-94.382	NaN	-94.409
0.59908	-84.813	NaN	-84.495	-71.533	NaN	-71.855	-92.474	NaN	-92.684	-78.592	NaN	-78.858	-94.379	NaN	-94.388
0.59958	-84.81	NaN	-84.438	-71.533	NaN	-71.838	-92.467	NaN	-92.684	-78.59	NaN	-78.847	-94.376	NaN	-94.346
0.60008	-84.806	NaN	-84.352	-71.532	NaN	-71.863	-92.46	NaN	-92.684	-78.588	NaN	-78.867	-94.373	NaN	-94.328
0.60058	-84.803	NaN	-84.355	-71.531	NaN	-71.872	-92.454	NaN	-92.681	-78.586	NaN	-78.878	-94.369	NaN	-94.198
0.60108	-84.799	NaN	-84.333	-71.531	NaN	-71.885	-92.447	NaN	-92.573	-78.584	NaN	-78.939	-94.366	NaN	-94.154
0.60157	-84.795	NaN	-84.377	-71.53	NaN	-71.922	-92.44	NaN	-92.626	-78.582	NaN	-78.904	-94.363	NaN	-94.159
0.60207	-84.792	NaN	-84.392	-71.529	NaN	-71.938	-92.433	NaN	-92.733	-78.58	NaN	-78.862	-94.36	NaN	-94.224
0.60257	-84.788	NaN	-84.447	-71.529	NaN	-71.908	-92.427	NaN	-92.726	-78.578	NaN	-78.778	-94.357	NaN	-94.255
0.60307	-84.785	NaN	-84.454	-71.528	NaN	-71.903	-92.42	NaN	-92.732	-78.576	NaN	-78.726	-94.354	NaN	-94.531
0.60357	-84.781	NaN	-84.454	-71.527	NaN	-71.921	-92.413	NaN	-92.727	-78.574	NaN	-78.602	-94.351	NaN	-94.63
0.60407	-84.777	NaN	-84.424	-71.527	NaN	-71.902	-92.407	NaN	-92.8	-78.572	NaN	-78.546	-94.348	NaN	-94.681
0.60456	-84.774	NaN	-84.402	-71.526	NaN	-71.916	-92.4	NaN	-92.889	-78.571	NaN	-78.523	-94.345	NaN	-94.722
0.60506	-84.77	NaN	-84.365	-71.525	NaN	-71.958	-92.393	NaN	-92.91	-78.569	NaN	-78.511	-94.342	NaN	-94.868
0.60556	-84.767	NaN	-84.333	-71.525	NaN	-72.002	-92.387	NaN	-92.979	-78.567	NaN	-78.563	-94.339	NaN	-94.81
0.60606	-84.763	NaN	-84.36	-71.524	NaN	-72.004	-92.38	NaN	-93.122	-78.565	NaN	-78.622	-94.336	NaN	-94.783
0.60656	-84.759	NaN	-84.358	-71.523	NaN	-72.01	-92.373	NaN	-93.078	-78.563	NaN	-78.665	-94.333	NaN	-94.749
0.60705	-84.756	NaN	-84.313	-71.523	NaN	-71.983	-92.367	NaN	-93.067	-78.561	NaN	-78.723	-94.33	NaN	-94.766
0.60755	-84.752	NaN	-84.312	-71.522	NaN	-71.86	-92.36	NaN	-93.019	-78.559	NaN	-78.766	-94.327	NaN	-94.769
0.60805	-84.749	NaN	-84.318	-71.521	NaN	-71.884	-92.353	NaN	-93.066	-78.557	NaN	-78.787	-94.324	NaN	-94.853
0.60855	-84.745	NaN	-84.277	-71.521	NaN	-71.907	-92.347	NaN	-93.063	-78.555	NaN	-78.795	-94.321	NaN	-94.899
0.60905	-84.742	NaN	-84.228	-71.52	NaN	-71.933	-92.34	NaN	-93.048	-78.553	NaN	-78.801	-94.318	NaN	-94.809
0.60955	-84.738	NaN	-84.163	-71.519	NaN	-71.967	-92.334	NaN	-93.109	-78.551	NaN	-78.79	-94.315	NaN	-94.845
0.61004	-84.734	NaN	-84.168	-71.519	NaN	-71.95	-92.327	NaN	-93.078	-78.549	NaN	-78.785	-94.312	NaN	-94.919
0.61054	-84.731	NaN	-84.179	-71.518	NaN	-71.905	-92.32	NaN	-93.022	-78.547	NaN	-78.739	-94.309	NaN	-94.809
0.61104	-84.727	NaN	-84.243	-71.517	NaN	-71.831	-92.314	NaN	-92.886	-78.545	NaN	-78.767	-94.306	NaN	-94.749
0.61154	-84.724	NaN	-84.329	-71.517	NaN	-71.666	-92.307	NaN	-92.785	-78.543	NaN	-78.775	-94.303	NaN	-94.731
0.61204	-84.72	NaN	-84.43	-71.516	NaN	-71.621	-92.301	NaN	-92.715	-78.541	NaN	-78.765	-94.3	NaN	-94.472
0.61253	-84.717	NaN	-84.46	-71.515	NaN	-71.576	-92.294	NaN	-92.715	-78.539	NaN	-78.804	-94.297	NaN	-94.389
0.61303	-84.713	NaN	-84.466	-71.515	NaN	-71.61	-92.288	NaN	-92.715	-78.538	NaN	-78.826	-94.295	NaN	-94.191
0.61353	-84.71	NaN	-84.512	-71.514	NaN	-71.647	-92.281	NaN	-92.604	-78.536	NaN	-78.82	-94.292	NaN	-93.907
0.61403	-84.706	NaN	-84.564	-71.513	NaN	-71.665	-92.275	NaN	-92.405	-78.534	NaN	-78.809	-94.289	NaN	-93.667
0.61453	-84.702	NaN	-84.639	-71.513	NaN	-71.652	-92.268	NaN	-92.405	-78.532	NaN	-78.849	-94.286	NaN	-93.614
0.61503	-84.699	NaN	-84.714	-71.512	NaN	-71.653	-92.262	NaN	-92.521	-78.53	NaN	-78.851	-94.283	NaN	-93.556
0.61552	-84.695	NaN	-84.753	-71.511	NaN	-71.587	-92.255	NaN	-92.495	-78.528	NaN	-78.885	-94.28	NaN	-93.64
0.61602	-84.692	NaN	-84.801	-71.511	NaN	-71.534	-92.249	NaN	-92.498	-78.526	NaN	-78.908	-94.277	NaN	-93.663
0.61652	-84.688	NaN	-84.579	-71.51	NaN	-71.519	-92.242	NaN	-92.442	-78.524	NaN	-78.94	-94.275	NaN	-93.727
0.61702	-84.685	NaN	-84.548	-71.509	NaN	-71.49	-92.236	NaN	-92.44	-78.522	NaN	-78.987	-94.272	NaN	-93.864
0.61752	-84.681	NaN	-84.518	-71.509	NaN	-71.459	-92.229	NaN	-92.446	-78.52	NaN	-79.027	-94.269	NaN	-93.93
0.61801	-84.678	NaN	-84.521	-71.508	NaN	-71.405	-92.223	NaN	-92.405	-78.518	NaN	-79.061	-94.266	NaN	-93.971
0.61851	-84.674	NaN	-84.518	-71.507	NaN	-71.378	-92.216	NaN	-92.269	-78.516	NaN	-79.106	-94.263	NaN	-94.133
0.61901	-84.671	NaN	-84.508	-71.507	NaN	-71.347	-92.21	NaN	-92.248	-78.514	NaN	-79.111	-94.261	NaN	-94.136
0.61951	-84.667	NaN	-84.522	-71.506	NaN	-71.358	-92.203	NaN	-92.248	-78.513	NaN	-79.055	-94.258	NaN	-93.994
0.62001	-84.664	NaN	-84.537	-71.505	NaN	-71.373	-92.197	NaN	-92.25	-78.511	NaN	-78.983	-94.255	NaN	-93.994
0.62051	-84.66	NaN	-84.542	-71.505	NaN	-71.389	-92.191	NaN	-92.329	-78.509	NaN	-78.91	-94.252	NaN	-93.992
0.621	-84.657	NaN	-84.547	-71.504	NaN	-71.39	-92.184	NaN	-92.33	-78.507	NaN	-78.855	-94.25	NaN	-93.991
0.6215	-84.653	NaN	-84.596	-71.503	NaN	-71.416	-92.178	NaN	-92.376	-78.505	NaN	-78.849	-94.247	NaN	-93.927
0.622	-84.65	NaN	-84.618	-71.503	NaN	-71.386	-92.171	NaN	-92.332	-78.503	NaN	-78.849	-94.244	NaN	-93.933
0.6225	-84.646	NaN	-84.583	-71.502	NaN	-71.372	-92.165	NaN	-92.341	-78.501	NaN	-78.889	-94.241	NaN	-93.927
0.623	-84.643	NaN	-84.579	-71.501	NaN	-71.361	-92.159	NaN	-92.292	-78.499	NaN	-78.893	-94.239	NaN	-93.93
0.62349	-84.639	NaN	-84.599	-71.501	NaN	-71.346	-92.152	NaN	-92.277	-78.497	NaN	-78.899	-94.236	NaN	-93.883
0.62399	-84.636	NaN	-84.608	-71.5	NaN	-71.366	-92.146	NaN	-92.248	-78.495	NaN	-78.9	-94.233	NaN	-93.977
0.62449	-84.632	NaN	-84.608	-71.499	NaN	-71.439	-92.139	NaN	-92.271	-78.494	NaN	-78.894	-94.231	NaN	-94.02
0.62499	-84.629	NaN	-84.661	-71.499	NaN	-71.478	-92.133	NaN	-92.202	-78.492	NaN	-78.89	-94.228	NaN	-94.067
0.62549	-84.626	NaN	-84.667	-71.498	NaN	-71.535	-92.127	NaN	-92.266	-78.49	NaN	-78.889	-94.225	NaN	-94.072
0.62599	-84.622	NaN	-84.652	-71.497	NaN	-71.571	-92.12	NaN	-92.356	-78.488	NaN	-78.868	-94.223	NaN	-94.09
0.62648	-84.619	NaN	-84.602	-71.497	NaN	-71.601	-92.114	NaN	-92.448	-78.486	NaN	-78.833	-94.22	NaN	-94.026
0.62698	-84.615	NaN	-84.633	-71.496	NaN	-71.619	-92.108	NaN	-92.416	-78.484	NaN	-78.822	-94.217	NaN	-93.962
0.62748	-84.612	NaN	-84.617	-71.495	NaN	-71.632	-92.102	NaN	-92.221	-78.482	NaN	-78.789	-94.215	NaN	-93.908
0.62798	-84.608	NaN	-84.63	-71.495	NaN	-71.664	-92.095	NaN	-91.973	-78.48	NaN	-78.601	-94.212	NaN	-93.875
0.62848	-84.605	NaN	-84.661	-71.494	NaN	-71.701	-92.089	NaN	-91.85	-78.478	NaN	-78.5	-94.209	NaN	-93.803
0.62897	-84.601	NaN	-84.691	-71.493	NaN	-71.718	-92.083	NaN	-91.804	-78.476	NaN	-78.414	-94.207	NaN	-93.927
0.62947	-84.598	NaN	-84.725	-71.493	NaN	-71.751	-92.076	NaN	-91.838	-78.475	NaN	-78.349	-94.204	NaN	-93.983
0.62997	-84.594	NaN	-84.764	-71.492	NaN	-71.727	-92.07	NaN	-91.812	-78.473	NaN	-78.334	-94.202	NaN	-94.078
0.63047	-84.591	NaN	-84.753	-71.491	NaN	-71.706	-92.064	NaN	-91.777	-78.471	NaN	-78.38	-94.199	NaN	-94.191
0.63097	-84.588	NaN	-84.743	-71.491	NaN	-71.67	-92.058	NaN	-91.714	-78.469	NaN	-78.414	-94.196	NaN	-94.319
0.63147	-84.584	NaN	-84.696	-71.49	NaN	-71.672	-92.051	NaN	-91.799	-78.467	NaN	-78.458	-94.194	NaN	-94.468
0.63196	-84.581	NaN	-84.693	-71.489	NaN	-71.66	-92.045	NaN	-91.787	-78.465	NaN	-78.511	-94.191	NaN	-94.468
0.63246	-84.577	NaN	-84.708	-71.489	NaN	-71.674	-92.039	NaN	-91.825	-78.463	NaN	-78.527	-94.189	NaN	-94.484
0.63296	-84.574	NaN	-84.727	-71.488	NaN	-71.664	-92.033	NaN	-91.973	-78.461	NaN	-78.536	-94.186	NaN	-94.484
0.63346	-84.57	NaN	-84.814	-71.487	NaN	-71.681	-92.026	NaN	-92.037	-78.46	NaN	-78.532	-94.184	NaN	-94.497
0.63396	-84.567	NaN	-84.839	-71.487	NaN	-71.689	-92.02	NaN	-92.039	-78.458	NaN	-78.511	-94.181	NaN	-94.436
0.63445	-84.564	NaN	-84.789	-71.486	NaN	-71.683	-92.014	NaN	-92.095	-78.456	NaN	-78.489	-94.179	NaN	-94.395
0.63495	-84.56	NaN	-84.734	-71.485	NaN	-71.668	-92.008	NaN	-92.074	-78.454	NaN	-78.504	-94.176	NaN	-94.157
0.63545	-84.557	NaN	-84.628	-71.485	NaN	-71.692	-92.002	NaN	-92.057	-78.452	NaN	-78.482	-94.174	NaN	-94.157
0.63595	-84.553	NaN	-84.592	-71.484	NaN	-71.699	-91.996	NaN	-92.095	-78.45	NaN	-78.466	-94.171	NaN	-94.157
0.63645	-84.55	NaN	-84.618	-71.483	NaN	-71.68	-91.989	NaN	-92.073	-78.448	NaN	-78.433	-94.169	NaN	-94.275
0.63695	-84.547	NaN	-84.69	-71.483	NaN	-71.677	-91.983	NaN	-92.108	-78.446	NaN	-78.401	-94.166	NaN	-94.275
0.63744	-84.543	NaN	-84.721	-71.482	NaN	-71.707	-91.977	NaN	-92.219	-78.445	NaN	-78.333	-94.164	NaN	-94.275
0.63794	-84.54	NaN	-84.753	-71.481	NaN	-71.704	-91.971	NaN	-92.254	-78.443	NaN	-78.294	-94.161	NaN	-94.006
0.63844	-84.536	NaN	-84.763	-71.481	NaN	-71.691	-91.965	NaN	-92.303	-78.441	NaN	-78.239	-94.159	NaN	-93.872
0.63894	-84.533	NaN	-84.761	-71.48	NaN	-71.704	-91.959	NaN	-92.288	-78.439	NaN	-78.223	-94.156	NaN	-93.765
0.63944	-84.53	NaN	-84.798	-71.479	NaN	-71.722	-91.953	NaN	-92.259	-78.437	NaN	-78.218	-94.154	NaN	-93.701
0.63993	-84.526	NaN	-84.83	-71.479	NaN	-71.755	-91.946	NaN	-92.213	-78.435	NaN	-78.228	-94.151	NaN	-93.713
0.64043	-84.523	NaN	-84.795	-71.478	NaN	-71.765	-91.94	NaN	-92.147	-78.433	NaN	-78.199	-94.149	NaN	-93.841
0.64093	-84.52	NaN	-84.785	-71.478	NaN	-71.762	-91.934	NaN	-92.115	-78.432	NaN	-78.159	-94.147	NaN	-93.922
0.64143	-84.516	NaN	-84.775	-71.477	NaN	-71.764	-91.928	NaN	-92.253	-78.43	NaN	-78.096	-94.144	NaN	-93.988
0.64193	-84.513	NaN	-84.689	-71.476	NaN	-71.749	-91.922	NaN	-92.324	-78.428	NaN	-78.078	-94.142	NaN	-94.067
0.64243	-84.51	NaN	-84.633	-71.476	NaN	-71.719	-91.916	NaN	-92.372	-78.426	NaN	-78.026	-94.139	NaN	-94.16
0.64292	-84.506	NaN	-84.634	-71.475	NaN	-71.704	-91.91	NaN	-92.459	-78.424	NaN	-78.006	-94.137	NaN	-94.224
0.64342	-84.503	NaN	-84.575	-71.474	NaN	-71.69	-91.904	NaN	-92.437	-78.422	NaN	-78.034	-94.135	NaN	-94.363
0.64392	-84.499	NaN	-84.588	-71.474	NaN	-71.693	-91.898	NaN	-92.373	-78.42	NaN	-78.046	-94.132	NaN	-94.568
0.64442	-84.496	NaN	-84.611	-71.473	NaN	-71.684	-91.892	NaN	-92.265	-78.419	NaN	-78.071	-94.13	NaN	-94.713
0.64492	-84.493	NaN	-84.61	-71.472	NaN	-71.714	-91.886	NaN	-92.204	-78.417	NaN	-78.164	-94.127	NaN	-94.766
0.64541	-84.489	NaN	-84.609	-71.472	NaN	-71.711	-91.88	NaN	-91.906	-78.415	NaN	-78.205	-94.125	NaN	-94.722
0.64591	-84.486	NaN	-84.576	-71.471	NaN	-71.706	-91.874	NaN	-91.679	-78.413	NaN	-78.249	-94.123	NaN	-94.694
0.64641	-84.483	NaN	-84.51	-71.47	NaN	-71.731	-91.868	NaN	-91.549	-78.411	NaN	-78.27	-94.12	NaN	-94.653
0.64691	-84.479	NaN	-84.325	-71.47	NaN	-71.739	-91.862	NaN	-91.476	-78.409	NaN	-78.265	-94.118	NaN	-94.47
0.64741	-84.476	NaN	-84.186	-71.469	NaN	-71.722	-91.856	NaN	-91.671	-78.408	NaN	-78.257	-94.116	NaN	-94.363
0.64791	-84.473	NaN	-84.096	-71.468	NaN	-71.738	-91.85	NaN	-91.792	-78.406	NaN	-78.278	-94.113	NaN	-94.169
0.6484	-84.469	NaN	-84.044	-71.468	NaN	-71.744	-91.844	NaN	-91.986	-78.404	NaN	-78.318	-94.111	NaN	-93.979
0.6489	-84.466	NaN	-84.032	-71.467	NaN	-71.716	-91.838	NaN	-92.245	-78.402	NaN	-78.309	-94.109	NaN	-93.942
0.6494	-84.463	NaN	-84.017	-71.466	NaN	-71.695	-91.832	NaN	-92.314	-78.4	NaN	-78.289	-94.107	NaN	-93.838
0.6499	-84.459	NaN	-84.031	-71.466	NaN	-71.666	-91.826	NaN	-92.318	-78.398	NaN	-78.199	-94.104	NaN	-93.846
0.6504	-84.456	NaN	-84.079	-71.465	NaN	-71.641	-91.82	NaN	-92.16	-78.397	NaN	-78.138	-94.102	NaN	-93.846
0.65089	-84.453	NaN	-84.152	-71.464	NaN	-71.648	-91.814	NaN	-92.15	-78.395	NaN	-78.144	-94.1	NaN	-93.834
0.65139	-84.45	NaN	-84.186	-71.464	NaN	-71.641	-91.808	NaN	-92.143	-78.393	NaN	-78.144	-94.097	NaN	-93.735
0.65189	-84.446	NaN	-84.223	-71.463	NaN	-71.653	-91.802	NaN	-92.118	-78.391	NaN	-78.101	-94.095	NaN	-93.728
0.65239	-84.443	NaN	-84.272	-71.462	NaN	-71.656	-91.796	NaN	-92.123	-78.389	NaN	-78.085	-94.093	NaN	-93.738
0.65289	-84.44	NaN	-84.264	-71.462	NaN	-71.619	-91.79	NaN	-92.179	-78.387	NaN	-78.077	-94.091	NaN	-93.942
0.65339	-84.436	NaN	-84.257	-71.461	NaN	-71.571	-91.784	NaN	-92.199	-78.386	NaN	-78.127	-94.088	NaN	-94.087
0.65388	-84.433	NaN	-84.269	-71.46	NaN	-71.572	-91.778	NaN	-92.224	-78.384	NaN	-78.152	-94.086	NaN	-94.148
0.65438	-84.43	NaN	-84.336	-71.46	NaN	-71.548	-91.773	NaN	-92.364	-78.382	NaN	-78.177	-94.084	NaN	-94.194
0.65488	-84.426	NaN	-84.362	-71.459	NaN	-71.492	-91.767	NaN	-92.535	-78.38	NaN	-78.235	-94.082	NaN	-94.204
0.65538	-84.423	NaN	-84.399	-71.458	NaN	-71.498	-91.761	NaN	-92.652	-78.378	NaN	-78.285	-94.08	NaN	-94.169
0.65588	-84.42	NaN	-84.454	-71.458	NaN	-71.509	-91.755	NaN	-92.816	-78.376	NaN	-78.345	-94.077	NaN	-94.169
0.65637	-84.417	NaN	-84.514	-71.457	NaN	-71.464	-91.749	NaN	-92.73	-78.375	NaN	-78.414	-94.075	NaN	-94.195
0.65687	-84.413	NaN	-84.523	-71.457	NaN	-71.441	-91.743	NaN	-92.543	-78.373	NaN	-78.406	-94.073	NaN	-94.262
0.65737	-84.41	NaN	-84.476	-71.456	NaN	-71.484	-91.737	NaN	-92.494	-78.371	NaN	-78.408	-94.071	NaN	-94.316
0.65787	-84.407	NaN	-84.455	-71.455	NaN	-71.468	-91.732	NaN	-92.462	-78.369	NaN	-78.427	-94.069	NaN	-94.363
0.65837	-84.404	NaN	-84.406	-71.455	NaN	-71.484	-91.726	NaN	-92.436	-78.367	NaN	-78.274	-94.066	NaN	-94.397
0.65887	-84.4	NaN	-84.214	-71.454	NaN	-71.49	-91.72	NaN	-92.451	-78.366	NaN	-78.186	-94.064	NaN	-94.374
0.65936	-84.397	NaN	-84.215	-71.453	NaN	-71.505	-91.714	NaN	-92.469	-78.364	NaN	-78.177	-94.062	NaN	-94.336
0.65986	-84.394	NaN	-84.219	-71.453	NaN	-71.528	-91.708	NaN	-92.436	-78.362	NaN	-78.251	-94.06	NaN	-94.307
0.66036	-84.39	NaN	-84.299	-71.452	NaN	-71.548	-91.702	NaN	-92.39	-78.36	NaN	-78.324	-94.058	NaN	-94.343
0.66086	-84.387	NaN	-84.271	-71.451	NaN	-71.572	-91.697	NaN	-92.372	-78.358	NaN	-78.324	-94.056	NaN	-94.243
0.66136	-84.384	NaN	-84.268	-71.451	NaN	-71.603	-91.691	NaN	-92.375	-78.357	NaN	-78.322	-94.054	NaN	-94.189
0.66185	-84.381	NaN	-84.168	-71.45	NaN	-71.609	-91.685	NaN	-92.375	-78.355	NaN	-78.338	-94.051	NaN	-94.224
0.66235	-84.377	NaN	-84.064	-71.449	NaN	-71.6	-91.679	NaN	-92.326	-78.353	NaN	-78.324	-94.049	NaN	-94.177
0.66285	-84.374	NaN	-84.043	-71.449	NaN	-71.58	-91.674	NaN	-92.266	-78.351	NaN	-78.271	-94.047	NaN	-94.073
0.66335	-84.371	NaN	-84.116	-71.448	NaN	-71.424	-91.668	NaN	-91.879	-78.349	NaN	-78.196	-94.045	NaN	-94.002
0.66385	-84.368	NaN	-84.122	-71.447	NaN	-71.394	-91.662	NaN	-91.761	-78.348	NaN	-78.111	-94.043	NaN	-94.006
0.66435	-84.365	NaN	-84.153	-71.447	NaN	-71.395	-91.656	NaN	-91.523	-78.346	NaN	-78.066	-94.041	NaN	-94.006
0.66484	-84.361	NaN	-84.129	-71.446	NaN	-71.421	-91.651	NaN	-91.439	-78.344	NaN	-78.066	-94.039	NaN	-94.038
0.66534	-84.358	NaN	-84.08	-71.445	NaN	-71.479	-91.645	NaN	-91.474	-78.342	NaN	-78.084	-94.037	NaN	-94.055
0.66584	-84.355	NaN	-84.053	-71.445	NaN	-71.509	-91.639	NaN	-91.537	-78.34	NaN	-78.148	-94.035	NaN	-94.148
0.66634	-84.352	NaN	-83.968	-71.444	NaN	-71.535	-91.633	NaN	-91.731	-78.339	NaN	-78.173	-94.033	NaN	-94.233
0.66684	-84.348	NaN	-83.935	-71.443	NaN	-71.577	-91.628	NaN	-91.769	-78.337	NaN	-78.159	-94.03	NaN	-94.284
0.66733	-84.345	NaN	-83.858	-71.443	NaN	-71.581	-91.622	NaN	-91.777	-78.335	NaN	-78.154	-94.028	NaN	-94.264
0.66783	-84.342	NaN	-83.752	-71.442	NaN	-71.6	-91.616	NaN	-91.755	-78.333	NaN	-78.139	-94.026	NaN	-94.336
0.66833	-84.339	NaN	-83.694	-71.442	NaN	-71.58	-91.611	NaN	-91.642	-78.331	NaN	-78.113	-94.024	NaN	-94.237
0.66883	-84.336	NaN	-83.651	-71.441	NaN	-71.567	-91.605	NaN	-91.503	-78.33	NaN	-78.134	-94.022	NaN	-94.179
0.66933	-84.332	NaN	-83.658	-71.44	NaN	-71.516	-91.599	NaN	-91.409	-78.328	NaN	-78.099	-94.02	NaN	-94.098
0.66983	-84.329	NaN	-83.674	-71.44	NaN	-71.446	-91.594	NaN	-91.34	-78.326	NaN	-78.056	-94.018	NaN	-93.995
0.67032	-84.326	NaN	-83.686	-71.439	NaN	-71.419	-91.588	NaN	-91.242	-78.324	NaN	-78.025	-94.016	NaN	-93.959
0.67082	-84.323	NaN	-83.692	-71.438	NaN	-71.329	-91.582	NaN	-91.165	-78.323	NaN	-78.008	-94.014	NaN	-93.93
0.67132	-84.32	NaN	-83.739	-71.438	NaN	-71.285	-91.577	NaN	-91.273	-78.321	NaN	-77.996	-94.012	NaN	-93.855
0.67182	-84.316	NaN	-83.767	-71.437	NaN	-71.284	-91.571	NaN	-91.378	-78.319	NaN	-77.971	-94.01	NaN	-93.823
0.67232	-84.313	NaN	-83.796	-71.436	NaN	-71.28	-91.565	NaN	-91.577	-78.317	NaN	-77.909	-94.008	NaN	-93.739
0.67281	-84.31	NaN	-83.824	-71.436	NaN	-71.26	-91.56	NaN	-91.668	-78.315	NaN	-77.877	-94.006	NaN	-93.686
0.67331	-84.307	NaN	-83.77	-71.435	NaN	-71.255	-91.554	NaN	-91.812	-78.314	NaN	-77.876	-94.004	NaN	-93.666
0.67381	-84.304	NaN	-83.652	-71.434	NaN	-71.15	-91.548	NaN	-92.094	-78.312	NaN	-77.901	-94.002	NaN	-93.692
0.67431	-84.3	NaN	-83.573	-71.434	NaN	-71.029	-91.543	NaN	-91.979	-78.31	NaN	-77.908	-94	NaN	-93.626
0.67481	-84.297	NaN	-83.603	-71.433	NaN	-71.045	-91.537	NaN	-91.781	-78.308	NaN	-77.936	-93.998	NaN	-93.722
0.67531	-84.294	NaN	-83.687	-71.432	NaN	-71.017	-91.532	NaN	-91.688	-78.307	NaN	-78.006	-93.996	NaN	-93.823
0.6758	-84.291	NaN	-83.728	-71.432	NaN	-71.032	-91.526	NaN	-91.629	-78.305	NaN	-78.05	-93.994	NaN	-93.846
0.6763	-84.288	NaN	-83.744	-71.431	NaN	-71.037	-91.521	NaN	-91.61	-78.303	NaN	-78.099	-93.993	NaN	-93.957
0.6768	-84.285	NaN	-83.751	-71.43	NaN	-70.987	-91.515	NaN	-91.702	-78.301	NaN	-78.143	-93.991	NaN	-93.974
0.6773	-84.281	NaN	-83.723	-71.43	NaN	-71.036	-91.509	NaN	-91.799	-78.3	NaN	-78.208	-93.989	NaN	-93.931
0.6778	-84.278	NaN	-83.601	-71.429	NaN	-71.049	-91.504	NaN	-91.799	-78.298	NaN	-78.216	-93.987	NaN	-93.814
0.67829	-84.275	NaN	-83.517	-71.429	NaN	-71.114	-91.498	NaN	-91.799	-78.296	NaN	-78.206	-93.985	NaN	-93.776
0.67879	-84.272	NaN	-83.62	-71.428	NaN	-71.165	-91.493	NaN	-91.796	-78.294	NaN	-78.197	-93.983	NaN	-93.774
0.67929	-84.269	NaN	-83.63	-71.427	NaN	-71.17	-91.487	NaN	-91.787	-78.292	NaN	-78.186	-93.981	NaN	-93.777
0.67979	-84.266	NaN	-83.655	-71.427	NaN	-71.106	-91.482	NaN	-91.786	-78.291	NaN	-78.181	-93.979	NaN	-93.767
0.68029	-84.263	NaN	-83.691	-71.426	NaN	-71.074	-91.476	NaN	-91.844	-78.289	NaN	-78.146	-93.977	NaN	-93.779
0.68079	-84.259	NaN	-83.682	-71.425	NaN	-71.065	-91.471	NaN	-91.906	-78.287	NaN	-78.143	-93.975	NaN	-93.854
0.68128	-84.256	NaN	-83.722	-71.425	NaN	-71.072	-91.465	NaN	-92.013	-78.285	NaN	-78.04	-93.973	NaN	-93.821
0.68178	-84.253	NaN	-83.731	-71.424	NaN	-71.07	-91.46	NaN	-92.149	-78.284	NaN	-78.076	-93.972	NaN	-93.864
0.68228	-84.25	NaN	-83.783	-71.423	NaN	-71.052	-91.454	NaN	-92.216	-78.282	NaN	-78.092	-93.97	NaN	-93.985
0.68278	-84.247	NaN	-83.835	-71.423	NaN	-71.02	-91.449	NaN	-92.283	-78.28	NaN	-78.111	-93.968	NaN	-94.101
0.68328	-84.244	NaN	-83.919	-71.422	NaN	-70.952	-91.443	NaN	-92.359	-78.278	NaN	-78.112	-93.966	NaN	-94.175
0.68377	-84.241	NaN	-83.986	-71.421	NaN	-70.932	-91.438	NaN	-92.349	-78.277	NaN	-78.109	-93.964	NaN	-94.273
0.68427	-84.238	NaN	-84.04	-71.421	NaN	-70.978	-91.432	NaN	-92.294	-78.275	NaN	-78.13	-93.962	NaN	-94.218
0.68477	-84.234	NaN	-84.044	-71.42	NaN	-71.001	-91.427	NaN	-92.245	-78.273	NaN	-78.154	-93.96	NaN	-94.2
0.68527	-84.231	NaN	-83.997	-71.419	NaN	-71.02	-91.421	NaN	-92.231	-78.271	NaN	-78.121	-93.959	NaN	-94.169
0.68577	-84.228	NaN	-83.967	-71.419	NaN	-71.091	-91.416	NaN	-92.314	-78.27	NaN	-78.157	-93.957	NaN	-94.055
0.68627	-84.225	NaN	-83.966	-71.418	NaN	-71.101	-91.41	NaN	-92.369	-78.268	NaN	-78.15	-93.955	NaN	-94.018
0.68676	-84.222	NaN	-83.999	-71.418	NaN	-71.075	-91.405	NaN	-92.375	-78.266	NaN	-78.111	-93.953	NaN	-94.055
0.68726	-84.219	NaN	-84.141	-71.417	NaN	-71.075	-91.4	NaN	-92.405	-78.264	NaN	-78.105	-93.951	NaN	-94.002
0.68776	-84.216	NaN	-84.196	-71.416	NaN	-71.091	-91.394	NaN	-92.523	-78.263	NaN	-78.131	-93.95	NaN	-94.005
0.68826	-84.213	NaN	-84.227	-71.416	NaN	-71.098	-91.389	NaN	-92.593	-78.261	NaN	-78.099	-93.948	NaN	-93.988
0.68876	-84.21	NaN	-84.263	-71.415	NaN	-71.123	-91.383	NaN	-92.662	-78.259	NaN	-78.146	-93.946	NaN	-93.992
0.68925	-84.206	NaN	-84.366	-71.414	NaN	-71.189	-91.378	NaN	-92.674	-78.258	NaN	-78.179	-93.944	NaN	-93.779
0.68975	-84.203	NaN	-84.425	-71.414	NaN	-71.233	-91.373	NaN	-92.642	-78.256	NaN	-78.218	-93.942	NaN	-93.776
0.69025	-84.2	NaN	-84.457	-71.413	NaN	-71.265	-91.367	NaN	-92.51	-78.254	NaN	-78.194	-93.941	NaN	-93.646
0.69075	-84.197	NaN	-84.507	-71.412	NaN	-71.276	-91.362	NaN	-92.262	-78.252	NaN	-78.207	-93.939	NaN	-93.646
0.69125	-84.194	NaN	-84.544	-71.412	NaN	-71.281	-91.356	NaN	-92.198	-78.251	NaN	-78.194	-93.937	NaN	-93.635
0.69175	-84.191	NaN	-84.573	-71.411	NaN	-71.268	-91.351	NaN	-92.204	-78.249	NaN	-78.216	-93.935	NaN	-93.66
0.69224	-84.188	NaN	-84.56	-71.41	NaN	-71.226	-91.346	NaN	-92.282	-78.247	NaN	-78.167	-93.934	NaN	-93.69
0.69274	-84.185	NaN	-84.576	-71.41	NaN	-71.161	-91.34	NaN	-92.326	-78.245	NaN	-78.112	-93.932	NaN	-93.699
0.69324	-84.182	NaN	-84.568	-71.409	NaN	-71.207	-91.335	NaN	-92.283	-78.244	NaN	-77.945	-93.93	NaN	-93.67
0.69374	-84.179	NaN	-84.577	-71.408	NaN	-71.199	-91.33	NaN	-92.227	-78.242	NaN	-77.882	-93.928	NaN	-93.677
0.69424	-84.176	NaN	-84.586	-71.408	NaN	-71.202	-91.324	NaN	-92.25	-78.24	NaN	-77.72	-93.927	NaN	-93.701
0.69473	-84.173	NaN	-84.631	-71.407	NaN	-71.152	-91.319	NaN	-92.19	-78.239	NaN	-77.681	-93.925	NaN	-93.792
0.69523	-84.17	NaN	-84.583	-71.407	NaN	-71.13	-91.314	NaN	-92.114	-78.237	NaN	-77.621	-93.923	NaN	-94.012
0.69573	-84.167	NaN	-84.538	-71.406	NaN	-71.131	-91.308	NaN	-92.089	-78.235	NaN	-77.594	-93.921	NaN	-94.163
0.69623	-84.163	NaN	-84.508	-71.405	NaN	-71.163	-91.303	NaN	-92.085	-78.233	NaN	-77.615	-93.92	NaN	-94.34
0.69673	-84.16	NaN	-84.471	-71.405	NaN	-71.217	-91.298	NaN	-92.077	-78.232	NaN	-77.632	-93.918	NaN	-94.34
0.69723	-84.157	NaN	-84.438	-71.404	NaN	-71.305	-91.293	NaN	-92.077	-78.23	NaN	-77.683	-93.916	NaN	-94.342
0.69772	-84.154	NaN	-84.438	-71.403	NaN	-71.342	-91.287	NaN	-92.092	-78.228	NaN	-77.729	-93.915	NaN	-94.258
0.69822	-84.151	NaN	-84.451	-71.403	NaN	-71.367	-91.282	NaN	-92.127	-78.227	NaN	-77.741	-93.913	NaN	-94.118
0.69872	-84.148	NaN	-84.474	-71.402	NaN	-71.384	-91.277	NaN	-92.175	-78.225	NaN	-77.768	-93.911	NaN	-93.989
0.69922	-84.145	NaN	-84.425	-71.401	NaN	-71.369	-91.272	NaN	-92.173	-78.223	NaN	-77.818	-93.909	NaN	-93.965
0.69972	-84.142	NaN	-84.451	-71.401	NaN	-71.36	-91.266	NaN	-92.231	-78.221	NaN	-77.791	-93.908	NaN	-93.927
0.70021	-84.139	NaN	-84.402	-71.4	NaN	-71.361	-91.261	NaN	-92.272	-78.22	NaN	-77.784	-93.906	NaN	-93.873
[truncated: 4,617 more rows]

## Sheet: Fig2-S1D
-0.2	NaN	NaN	2.7283	NaN	NaN	2.549	NaN	NaN	2.516	NaN	NaN	2.3737	NaN	NaN	2.8469	NaN	NaN	2.6947	NaN	NaN	1.9802
[truncated: 3,212 more rows]
