# Supplementary material for: Biophysics of object segmentation in a collision-detecting neuron
Source: eLife. 2018 Apr 18;7:e34238. doi: 10.7554/eLife.34238 (PMC5947989; doi:10.7554/eLife.34238)
Supplement: Figure 2—source data 3. — Code for generating plots is in the Matlab file Figure2_SourceCode3.m. [file elife-34238-fig2-data3.xlsx]

## Sheet: Fig2-S2A
0.04	-65.134	-71.622	-64.339	-68.958	-64.124	-70.074
0.040199	-65.015	-71.811	-64.522	-68.904	-64.374	-69.9
0.040399	-65.021	-71.576	-64.558	-69.264	-64.435	-70.138
0.040598	-65.049	-71.866	-64.406	-68.94	-64.57	-69.681
0.040797	-65.061	-72.07	-64.51	-69.367	-64.649	-69.9
0.040996	-64.719	-71.911	-64.278	-69.413	-64.725	-69.473
0.041196	-64.875	-71.789	-64.317	-69.154	-64.918	-69.635
0.041395	-64.802	-71.942	-64.51	-69.3	-64.744	-69.815
0.041594	-64.6	-71.628	-64.342	-69.267	-64.838	-69.693
0.041793	-64.701	-71.774	-64.632	-68.913	-64.716	-69.366
0.041993	-64.625	-71.915	-64.629	-69.035	-64.753	-69.412
0.042192	-64.811	-71.771	-64.491	-69.224	-65.073	-69.623
0.042391	-65.015	-71.884	-64.757	-69.114	-64.655	-69.598
0.042591	-64.844	-71.774	-64.784	-69.184	-64.478	-69.662
0.04279	-64.762	-71.649	-64.845	-68.989	-64.475	-69.604
0.042989	-64.64	-71.704	-64.861	-68.821	-64.472	-69.647
0.043188	-64.741	-71.734	-64.793	-68.772	-64.478	-69.519
0.043388	-64.799	-71.759	-64.888	-68.745	-64.402	-69.83
0.043587	-64.966	-71.658	-64.659	-68.525	-64.548	-69.61
0.043786	-65.034	-71.802	-64.818	-68.705	-64.432	-69.696
0.043985	-64.985	-71.973	-64.589	-68.528	-64.609	-69.934
0.044185	-65.15	-71.939	-64.909	-68.812	-64.509	-69.751
0.044384	-64.841	-71.573	-64.833	-68.711	-64.692	-69.748
0.044583	-64.939	-71.664	-64.861	-68.504	-64.936	-69.87
0.044783	-65.33	-71.951	-65.233	-68.467	-65.067	-69.665
0.044982	-65.085	-71.911	-64.986	-68.559	-65.272	-69.736
0.045181	-64.997	-71.96	-64.9	-68.781	-65.195	-70.041
0.04538	-64.939	-72.07	-65.208	-69.09	-65.247	-69.922
0.04558	-64.945	-71.756	-65.001	-68.827	-65.336	-69.952
0.045779	-65.22	-71.71	-65.01	-68.94	-65.183	-69.839
0.045978	-65.052	-71.457	-65.193	-68.763	-65.217	-69.891
0.046177	-64.841	-71.698	-64.977	-68.888	-65.385	-70.126
0.046377	-64.896	-71.695	-65.117	-68.644	-65.623	-70.352
0.046576	-64.948	-71.796	-65.022	-68.876	-65.848	-69.943
0.046775	-65.095	-71.817	-65.218	-69.056	-65.739	-70.148
0.046975	-64.908	-71.75	-65.431	-69.117	-65.757	-70.26
0.047174	-64.951	-71.866	-65.407	-69.175	-66.01	-70.172
0.047373	-64.933	-71.472	-65.288	-69.193	-65.998	-69.974
0.047572	-64.698	-71.249	-65.212	-69.093	-65.891	-70.264
0.047772	-64.707	-71.799	-65.147	-68.803	-65.882	-69.98
0.047971	-64.747	-71.826	-65.181	-69.044	-66.028	-70.001
0.04817	-64.869	-71.823	-65.3	-69.035	-65.787	-70.233
0.048369	-64.561	-71.64	-65.129	-69.38	-65.708	-70.148
0.048569	-64.817	-71.786	-65.346	-69.139	-65.385	-69.9
0.048768	-64.93	-71.774	-65.23	-69.01	-65.308	-70.26
0.048967	-64.86	-71.692	-65.071	-69.416	-65.461	-70.193
0.049167	-64.875	-71.811	-65.041	-69.27	-65.366	-70.303
0.049366	-64.933	-71.539	-65.117	-69.047	-65.516	-70.499
0.049565	-64.799	-71.881	-65.083	-68.901	-65.598	-70.132
0.049764	-64.826	-71.734	-65.044	-69.422	-65.659	-70.175
0.049964	-64.93	-71.808	-65.16	-69.352	-65.815	-70.068
0.050163	-64.857	-72.082	-65.111	-69.316	-66.007	-70.355
0.050362	-64.792	-71.68	-65.227	-69.203	-65.97	-70.523
0.050561	-65.027	-71.631	-65.093	-69.227	-65.699	-70.337
0.050761	-64.89	-71.692	-64.916	-69.209	-65.711	-70.071
0.05096	-64.789	-71.722	-65.184	-69.306	-65.681	-70.184
0.051159	-64.826	-71.85	-65.227	-69.074	-65.684	-70.398
0.051359	-64.887	-71.762	-65.16	-69.215	-65.565	-70.175
0.051558	-65.006	-71.722	-65.102	-69.346	-65.729	-70.593
0.051757	-64.927	-71.561	-65.123	-69.337	-65.845	-70.422
0.051956	-65.131	-71.628	-65.184	-69.059	-65.345	-70.041
0.052156	-65.009	-71.521	-64.79	-69.093	-65.076	-70.285
0.052355	-64.924	-71.38	-65.279	-68.833	-64.884	-70.352
0.052554	-64.625	-71.548	-65.178	-69.02	-64.985	-70.047
0.052753	-65.024	-71.448	-65.108	-68.757	-64.899	-70.206
0.052953	-64.921	-71.643	-65.096	-68.968	-64.994	-70.413
0.053152	-64.905	-71.582	-65.071	-68.803	-64.835	-70.206
0.053351	-64.89	-71.112	-65.282	-68.662	-64.893	-70.373
0.053551	-64.982	-70.822	-65.135	-68.69	-64.692	-70.312
0.05375	-64.759	-71.231	-65.379	-68.763	-64.854	-69.903
0.053949	-64.414	-71.341	-65.263	-68.714	-65.037	-70.227
0.054148	-63.987	-71.39	-65.013	-68.315	-65.153	-70.273
0.054348	-63.529	-71.271	-65.187	-68.547	-65.278	-70.276
0.054547	-63.37	-71.261	-65.047	-68.595	-65.259	-70.09
0.054746	-63.172	-71.231	-65.19	-68.464	-65.507	-70.141
0.054945	-63.138	-71.237	-65.349	-68.867	-65.394	-70.099
0.055145	-62.992	-70.938	-64.955	-68.696	-65.449	-70.248
0.055344	-62.58	-70.962	-65.212	-68.467	-65.665	-70.212
0.055543	-62.775	-71.258	-65.263	-68.583	-65.714	-69.845
0.055743	-62.72	-71.026	-65.202	-68.653	-65.543	-70.297
0.055942	-62.983	-71.088	-64.848	-68.897	-65.598	-70.257
0.056141	-62.876	-71.329	-64.867	-69.05	-65.513	-70.215
0.05634	-63.065	-70.926	-64.726	-69.02	-65.409	-70.108
0.05654	-63.23	-70.929	-64.665	-68.958	-65.339	-70.111
0.056739	-63.34	-71.225	-64.598	-69.035	-65.443	-70.038
0.056938	-63.599	-70.871	-64.311	-68.806	-65.253	-70.395
0.057137	-63.495	-71.023	-64.317	-68.794	-65	-70.41
0.057337	-63.66	-70.999	-64.269	-68.913	-65.067	-70.102
0.057536	-63.721	-71.075	-64.201	-69.096	-65.137	-70.138
0.057735	-63.782	-71.323	-64.65	-69.316	-64.768	-70.251
0.057935	-63.712	-71.088	-64.62	-69.132	-64.85	-70.193
0.058134	-63.828	-70.529	-64.635	-68.98	-65.076	-70.288
0.058333	-63.99	-70.822	-64.662	-68.983	-64.969	-70.227
0.058532	-63.871	-71.103	-64.595	-69.206	-64.86	-69.91
0.058732	-63.676	-70.907	-64.702	-69.007	-64.738	-70.376
0.058931	-63.291	-70.92	-64.439	-69.142	-64.814	-70.264
0.05913	-63.285	-70.99	-64.632	-69.276	-64.655	-70.23
0.059329	-63.157	-70.81	-64.635	-69.325	-64.722	-70.276
0.059529	-62.537	-70.672	-64.626	-69.419	-64.661	-70.157
0.059728	-62.223	-70.886	-64.674	-69.288	-64.728	-70.193
0.059927	-62.073	-70.959	-64.717	-69.078	-65.043	-70.337
0.060127	-62.433	-70.88	-64.861	-69.023	-65.031	-70.071
0.060326	-62.101	-70.706	-64.867	-69.135	-65.092	-70.416
0.060525	-61.979	-70.929	-64.787	-69.267	-64.893	-70.312
0.060724	-61.756	-70.853	-64.766	-69.074	-64.597	-70.328
0.060924	-62.11	-70.676	-64.757	-68.986	-64.475	-70.389
0.061123	-62.073	-70.364	-64.522	-68.833	-64.182	-70.477
0.061322	-62.147	-70.688	-64.098	-69.062	-64.02	-70.221
0.061521	-61.838	-70.544	-64.058	-68.736	-64.28	-69.989
0.061721	-61.732	-70.563	-63.884	-68.791	-64.377	-70.279
0.06192	-62.055	-70.596	-64.101	-69.065	-63.691	-70.251
0.062119	-62.095	-70.624	-63.783	-68.94	-63.315	-70.447
0.062319	-62.412	-70.346	-64.009	-69.029	-63.218	-70.541
0.062518	-62.556	-70.227	-63.936	-68.989	-63.123	-70.288
0.062717	-62.589	-70.117	-63.911	-68.998	-63.157	-70.389
0.062916	-62.91	-70.129	-63.969	-68.397	-62.934	-70.288
0.063116	-62.821	-70.129	-64.061	-68.87	-62.913	-70.3
0.063315	-62.778	-70.337	-63.936	-68.937	-62.711	-70.239
0.063514	-62.897	-70.16	-63.994	-68.983	-62.736	-70.068
0.063713	-63.154	-70.126	-63.881	-68.861	-62.815	-70.398
0.063913	-62.986	-69.974	-64.201	-68.748	-62.9	-70.12
0.064112	-63.004	-69.537	-64.079	-68.366	-63.053	-70.37
0.064311	-63.007	-69.934	-64.159	-68.351	-63.041	-69.723
0.064511	-62.729	-69.931	-64.055	-68.327	-63.132	-69.794
0.06471	-62.247	-69.894	-64.171	-68.141	-63.441	-69.824
0.064909	-62.223	-69.943	-63.939	-68.467	-63.792	-70.23
0.065108	-62.211	-70.068	-64.061	-68.421	-63.788	-70.083
0.065308	-61.854	-69.791	-63.911	-68.232	-63.874	-70.236
0.065507	-61.915	-69.772	-63.973	-67.839	-63.776	-70.193
0.065706	-61.948	-69.787	-64.073	-67.82	-63.706	-70.032
0.065905	-62.086	-69.937	-64.336	-67.686	-63.557	-69.961
0.066105	-62.147	-69.723	-64.079	-68.064	-63.166	-70.004
0.066304	-62.122	-69.968	-64.027	-67.994	-63.438	-69.729
0.066503	-62.397	-69.98	-64.211	-67.93	-63.395	-70.087
0.066703	-62.101	-69.574	-63.89	-67.896	-63.419	-70.428
0.066902	-61.729	-69.794	-63.643	-67.683	-63.38	-69.876
0.067101	-61.405	-69.549	-63.518	-67.82	-63.288	-70.105
0.0673	-61.249	-69.607	-62.996	-67.979	-63.135	-69.821
0.0675	-61.042	-69.522	-62.73	-67.243	-62.699	-69.58
0.067699	-60.895	-69.62	-62.358	-67.381	-62.501	-69.794
0.067898	-60.532	-69.452	-61.729	-67.658	-62.409	-69.928
0.068097	-60.56	-69.44	-61.083	-67.643	-62.308	-69.961
0.068297	-60.618	-69.284	-60.896	-67.781	-62.278	-69.827
0.068496	-60.486	-69.391	-60.576	-67.668	-61.332	-69.601
0.068695	-60.529	-68.976	-60.564	-67.488	-60.755	-69.369
0.068895	-60.45	-69.141	-60.542	-67.246	-60.071	-69.333
0.069094	-60.453	-69.153	-60.637	-67.35	-59.913	-69.174
0.069293	-60.251	-69.229	-60.725	-67.655	-59.827	-69.174
0.069492	-60.682	-69.314	-60.918	-67.442	-59.65	-69.446
0.069692	-60.63	-69.232	-60.893	-67.243	-59.635	-69.412
0.069891	-60.642	-69.055	-61.116	-66.847	-60.013	-69.314
0.07009	-60.551	-68.753	-61.305	-66.957	-60.102	-69.241
0.070289	-60.49	-69.256	-61.482	-66.615	-60.258	-68.878
0.070489	-60.737	-69.189	-61.867	-66.288	-60.459	-68.933
0.070688	-60.715	-69.247	-61.8	-66.487	-60.517	-69.211
0.070887	-60.52	-69.147	-61.678	-66.386	-60.319	-69.086
0.071087	-60.975	-69.083	-61.525	-66.703	-60.081	-68.964
0.071286	-60.938	-68.979	-61.128	-66.651	-59.617	-68.906
0.071485	-61.033	-69.25	-60.725	-66.438	-59.382	-68.991
0.071684	-60.908	-68.829	-60.429	-66.331	-58.872	-68.829
0.071884	-61.069	-68.875	-60.628	-66.261	-58.906	-68.872
0.072083	-60.99	-68.704	-60.347	-66.282	-58.494	-68.545
0.072282	-61.249	-68.982	-60.353	-66.34	-58.033	-68.576
0.072481	-60.941	-68.915	-60.259	-66.618	-58.121	-68.912
0.072681	-60.953	-68.667	-59.975	-66.566	-58.307	-68.661
0.07288	-60.975	-68.805	-59.303	-66.392	-58.494	-68.613
0.073079	-60.825	-68.585	-59.19	-66.557	-58.701	-68.466
0.073279	-60.789	-68.716	-59.068	-66.502	-59.144	-68.198
0.073478	-60.471	-68.307	-59.206	-66.078	-59.254	-68.014
0.073677	-60.477	-68.307	-58.775	-66.502	-59.135	-68.146
0.073876	-60.255	-68.155	-58.736	-66.398	-59.193	-68.109
0.074076	-60.459	-68.225	-58.949	-66.48	-59.174	-67.886
0.074275	-59.977	-68.332	-58.604	-66.175	-58.948	-67.615
0.074474	-59.922	-68.13	-58.659	-66.404	-58.655	-67.526
0.074673	-59.589	-67.978	-58.989	-66.099	-58.799	-67.596
0.074873	-59.467	-68.091	-59.169	-65.843	-58.491	-67.404
0.075072	-59.424	-67.764	-58.934	-65.876	-58.384	-67.193
0.075271	-59.104	-68.121	-59.239	-65.47	-58.344	-67.245
0.075471	-58.927	-67.688	-59.27	-65.577	-58.176	-67.151
0.07567	-59.019	-67.621	-59.34	-65.415	-58.015	-67.151
0.075869	-58.939	-67.657	-59.724	-65.092	-57.761	-67.056
0.076068	-59.162	-67.468	-59.679	-65.037	-57.453	-66.766
0.076268	-59.049	-67.428	-59.779	-64.863	-57.212	-66.418
0.076467	-59.302	-67.499	-59.755	-64.488	-56.98	-66.4
0.076666	-59.388	-67.258	-59.691	-64.756	-56.879	-66.757
0.076865	-59.217	-67.41	-59.453	-64.829	-56.492	-66.891
0.077065	-59.446	-67.236	-59.3	-64.802	-55.897	-66.98
0.077264	-59.36	-67.264	-59.349	-64.967	-53.388	-66.589
0.077463	-59.501	-67.004	-59.389	-64.701	-46.119	-66.461
0.077663	-59.36	-66.864	-58.717	-65.046	-41.651	-66.366
0.077862	-59.699	-67.102	-58.568	-64.936	-41.059	-66.489
0.078061	-59.711	-66.824	-58.33	-64.637	-43.577	-66.626
0.07826	-59.943	-66.861	-58.229	-64.475	-46.442	-66.586
0.07846	-59.949	-66.867	-58.36	-64.787	-48.572	-66.434
0.078659	-59.974	-66.864	-58.211	-64.741	-49.991	-66.308
0.078858	-59.864	-66.608	-58.052	-64.698	-50.812	-66.196
0.079057	-60.154	-66.65	-58.189	-64.61	-51.563	-66.113
0.079257	-59.962	-66.519	-58.034	-64.57	-51.978	-65.643
0.079456	-60.099	-66.684	-57.948	-64.466	-52.543	-65.805
0.079655	-60.01	-66.724	-57.677	-64.598	-52.613	-65.9
0.079855	-59.98	-66.687	-57.304	-64.042	-53.29	-65.674
0.080054	-60.041	-66.58	-57.289	-64.262	-53.873	-65.567
0.080253	-60.126	-66.724	-57.155	-64.222	-54.102	-65.402
0.080452	-59.922	-66.446	-57.045	-64.402	-53.931	-65.243
0.080652	-59.943	-66.174	-56.999	-64.256	-54.053	-65.198
0.080851	-59.714	-66.312	-56.853	-64.033	-54.096	-65.192
0.08105	-59.324	-66.354	-56.892	-63.743	-54.563	-64.755
0.081249	-58.79	-66.391	-56.834	-63.853	-54.52	-64.746
0.081449	-58.57	-66.193	-56.789	-63.902	-54.752	-64.648
0.081648	-58.558	-66.089	-56.606	-63.52	-54.722	-64.496
0.081847	-58.466	-65.964	-56.035	-63.728	-54.352	-64.191
0.082047	-58.539	-66.086	-50.688	-63.7	-54.474	-64.2
0.082246	-58.488	-65.68	-45.076	-63.743	-54.505	-63.663
0.082445	-58.546	-65.494	-42.51	-63.679	-54.026	-63.827
0.082644	-58.515	-65.314	-43.66	-63.331	-54.188	-63.956
0.082844	-58.356	-65.344	-46.495	-63.206	-54.224	-63.837
0.083043	-58.475	-65.686	-48.839	-63.136	-53.965	-63.925
0.083242	-58.048	-65.472	-50.575	-63.325	-54.047	-63.681
0.083441	-52.537	-65.158	-51.891	-63.148	-53.657	-63.37
0.083641	-46.65	-64.953	-52.867	-63.026	-51.859	-63.364
0.08384	-44.044	-65.274	-53.52	-62.708	-45.359	-63.04
0.084039	-45.396	-64.752	-53.941	-62.416	-41.276	-62.768
0.084239	-48.224	-64.697	-54.729	-62.199	-40.992	-62.997
0.084438	-50.632	-64.734	-55.382	-62.156	-43.656	-62.939
0.084637	-51.99	-64.654	-55.769	-62.147	-46.552	-62.46
0.084836	-53.29	-64.685	-55.919	-61.912	-48.386	-62.43
0.085036	-53.943	-64.596	-56.02	-61.238	-49.65	-62.323
0.085235	-54.532	-64.151	-55.956	-60.508	-50.233	-61.969
0.085434	-55.14	-64.48	-55.782	-54.984	-50.577	-62.021
0.085633	-55.5	-64.328	-56.252	-49.089	-50.684	-61.905
0.085833	-55.744	-64.371	-56.047	-46.153	-50.431	-61.651
0.086032	-56.064	-64.365	-56.123	-45.747	-50.764	-61.12
0.086231	-56.449	-64.236	-56.273	-46.763	-50.663	-60.986
0.086431	-56.818	-64.01	-56.435	-48.667	-51.197	-60.809
0.08663	-56.983	-63.977	-56.465	-49.854	-51.356	-60.541
0.086829	-57.407	-63.748	-56.783	-50.59	-51.633	-59.927
0.087028	-57.603	-63.754	-56.96	-51.362	-51.838	-59.366
0.087228	-57.953	-64.023	-56.798	-51.957	-51.835	-57.513
0.087427	-58.271	-63.681	-56.957	-52.476	-51.905	-50.552
0.087626	-58.448	-63.687	-56.95	-53.202	-51.893	-45.969
0.087825	-57.853	-63.699	-56.883	-53.538	-51.731	-43.951
0.088025	-57.224	-63.66	-56.49	-53.559	-51.743	-43.823
0.088224	-56.983	-63.312	-56.136	-54.011	-51.67	-44.781
0.088423	-56.653	-63.354	-56.175	-54.411	-51.331	-46.402
0.088623	-56.547	-63.071	-56.203	-54.124	-50.764	-47.272
0.088822	-56.675	-63.36	-56.117	-54.634	-46.949	-48.166
0.089021	-57.044	-63.18	-55.946	-54.994	-41.813	-48.953
0.08922	-57.499	-63.116	-55.959	-55.11	-40.098	-49.545
0.08942	-57.743	-62.75	-55.684	-55.531	-41.434	-50.268
0.089619	-57.67	-62.741	-55.626	-55.598	-44.636	-50.525
0.089818	-57.899	-62.723	-55.867	-55.717	-47.111	-50.519
0.090017	-58.033	-62.735	-55.821	-56.135	-48.533	-50.973
0.090217	-58.115	-62.732	-55.693	-56.364	-49.747	-51.401
0.090416	-58.243	-62.405	-55.803	-56.584	-50.434	-51.37
0.090615	-58.008	-62.308	-55.62	-56.803	-51.145	-51.855
0.090815	-57.773	-62.411	-55.415	-56.822	-51.539	-52.054
0.091014	-57.661	-61.804	-55.599	-57.267	-51.899	-51.996
0.091213	-57.862	-61.569	-55.876	-57.154	-52.146	-51.785
0.091412	-57.807	-61.67	-55.94	-57.06	-52.552	-52.145
0.091612	-57.761	-61.52	-55.971	-56.99	-52.888	-52.066
0.091811	-57.67	-61.346	-56.081	-57.456	-53.422	-51.932
0.09201	-57.822	-61.304	-55.873	-57.496	-53.727	-47.946
0.092209	-58.082	-61.212	-56.017	-57.698	-53.876	-42.712
0.092409	-57.996	-60.339	-56.154	-57.218	-53.739	-40.234
0.092608	-58.015	-58.188	-55.904	-57.011	-53.693	-39.731
0.092807	-58.201	-51.379	-56.166	-53.303	-54.072	-40.335
0.093007	-58.179	-46.774	-56.096	-47.746	-54.047	-42.386
0.093206	-58.314	-44.757	-56.038	-44.032	-53.882	-44.043
0.093405	-58.497	-44.635	-56.12	-43.717	-53.733	-45.135
0.093604	-58.619	-45.788	-56.029	-44.615	-53.425	-45.935
0.093804	-58.625	-47.626	-55.855	-46.299	-53.715	-46.49
0.094003	-58.793	-48.382	-55.821	-47.892	-53.699	-47.027
0.094202	-58.878	-49.103	-55.583	-48.954	-53.864	-47.51
0.094401	-58.988	-49.957	-55.708	-49.751	-53.989	-48.385
0.094601	-59.189	-50.687	-55.824	-50.343	-54.337	-48.675
0.0948	-59.177	-51.459	-55.519	-51.472	-54.597	-49.133
0.094999	-58.991	-51.984	-55.461	-51.631	-54.633	-49.463
0.095199	-59.342	-52.115	-55.595	-52.415	-54.85	-50.101
0.095398	-59.183	-52.402	-55.513	-52.973	-55.018	-49.957
0.095597	-59.186	-53.277	-54.25	-53.584	-55.402	-49.933
0.095796	-59.714	-53.348	-47.371	-53.846	-55.79	-49.826
0.095996	-60.016	-53.485	-42.967	-54.325	-56.089	-50.11
0.096195	-59.757	-53.888	-42.546	-54.484	-56.238	-50.326
0.096394	-59.913	-54.043	-44.862	-54.859	-56.611	-50.314
0.096593	-59.995	-54.434	-47.82	-55.512	-56.684	-49.768
0.096793	-60.05	-54.642	-49.529	-55.342	-56.525	-44.461
0.096992	-59.98	-54.608	-50.917	-55.903	-56.232	-40.442
0.097191	-60.023	-54.703	-52.049	-55.979	-55.744	-38.721
0.097391	-59.922	-54.962	-52.971	-55.888	-55.747	-39.517
0.09759	-60.178	-55.218	-53.844	-56.135	-55.115	-40.774
0.097789	-59.955	-55.578	-54.25	-56.544	-54.819	-42.703
0.097988	-59.989	-55.704	-54.698	-56.523	-54.661	-43.841
0.098188	-60.239	-55.893	-55.083	-56.73	-54.398	-44.949
0.098387	-60.093	-55.859	-55.537	-57.041	-54.645	-45.514
0.098586	-60.23	-56.164	-55.898	-56.825	-54.294	-46.509
0.098785	-60.236	-56.302	-56.264	-57.237	-54.417	-46.747
0.098985	-60.612	-56.625	-56.526	-57.173	-53.919	-47.464
0.099184	-60.508	-56.912	-56.773	-57.551	-53.403	-48.373
0.099383	-60.776	-56.964	-57.091	-57.911	-53.474	-49.1
0.099583	-60.737	-57.611	-57.353	-57.932	-53.004	-49.438
0.099782	-60.511	-57.645	-57.222	-58.216	-53.055	-49.786
0.099981	-60.773	-57.309	-57.356	-58.189	-53.168	-50.165
0.10018	-60.566	-57.629	-57.161	-58.152	-53.251	-50.354
0.10038	-60.874	-57.953	-57.436	-58.433	-53.202	-50.674
0.10058	-60.932	-58.349	-57.579	-58.561	-53.516	-50.943
0.10078	-60.847	-58.453	-57.515	-58.863	-53.373	-51.126
0.10098	-60.779	-58.664	-57.634	-58.848	-53.242	-51.379
0.10118	-60.84	-58.398	-57.689	-59.065	-53.409	-51.788
0.10138	-60.786	-58.267	-57.857	-59.129	-52.936	-51.77
0.10158	-60.92	-58.414	-58.052	-59.406	-47.693	-51.651
0.10177	-61.021	-58.456	-57.921	-59.345	-42.786	-51.617
0.10197	-61.097	-58.496	-57.954	-59.431	-41.483	-52.023
0.10217	-61.274	-58.716	-57.811	-59.498	-43.427	-52.298
0.10237	-60.969	-58.725	-57.75	-59.721	-46.58	-52.203
0.10257	-61.283	-59.057	-57.729	-59.818	-48.777	-52.505
0.10277	-61.405	-58.612	-57.808	-59.892	-50.156	-52.685
0.10297	-61.039	-58.475	-57.729	-59.907	-51.377	-52.493
0.10317	-61.283	-59.006	-58.101	-60.029	-52.32	-52.386
0.10337	-61.304	-58.813	-58.391	-60.139	-53.147	-52.597
0.10357	-61.133	-59.259	-58.348	-60.401	-53.882	-52.875
0.10377	-61.265	-58.957	-58.739	-60.185	-54.279	-52.594
0.10397	-61.494	-59.128	-58.827	-60.313	-54.835	-50.32
0.10417	-61.378	-59.085	-58.983	-60.606	-55.414	-44.662
0.10437	-61.548	-58.841	-58.974	-60.53	-56	-41.312
0.10456	-61.497	-58.798	-59.224	-60.691	-56.467	-40.372
0.10476	-61.323	-58.597	-59.12	-60.572	-57.038	-41.095
0.10496	-61.356	-58.975	-59.081	-60.636	-57.163	-42.889
0.10516	-61.387	-59.054	-59.392	-60.722	-57.484	-44.678
0.10536	-61.283	-59.14	-59.013	-60.719	-57.694	-45.901
0.10556	-61.262	-58.85	-59.151	-60.838	-57.52	-47.04
0.10576	-61.411	-58.707	-59.346	-61.012	-57.401	-47.449
0.10596	-61.436	-58.514	-59.407	-61.161	-57.151	-48.227
0.10616	-61.832	-58.819	-59.48	-61.198	-56.797	-49.158
0.10636	-61.741	-58.96	-59.337	-61.311	-56.107	-50.061
0.10656	-61.939	-59.085	-59.322	-61.308	-55.732	-50.329
0.10676	-61.976	-59.085	-59.172	-61.125	-55.491	-51.117
0.10696	-61.631	-59.314	-58.943	-61.35	-55.802	-51.407
0.10715	-61.509	-59.283	-58.675	-61.326	-55.738	-52.035
0.10735	-61.292	-59.512	-58.711	-61.482	-56.153	-52.472
0.10755	-60.929	-59.32	-58.571	-61.546	-56.687	-52.774
0.10775	-60.868	-59.439	-58.656	-61.46	-56.751	-52.875
0.10795	-60.911	-59.704	-58.724	-61.326	-57.075	-53.552
0.10815	-61.072	-59.796	-58.925	-61.476	-57.328	-53.964
0.10835	-61.225	-59.833	-59.084	-61.598	-57.807	-54.04
0.10855	-61.094	-59.958	-58.995	-61.482	-58.015	-54.388
0.10875	-61.503	-60.116	-58.995	-61.616	-58.372	-54.458
0.10895	-61.46	-59.997	-58.629	-61.753	-58.082	-54.77
0.10915	-61.469	-60.165	-58.424	-61.854	-57.816	-54.782
0.10935	-61.732	-60.202	-58.495	-62.022	-57.587	-55.31
0.10955	-61.567	-60.467	-58.635	-61.744	-57.929	-55.228
0.10975	-61.805	-60.651	-58.525	-61.35	-58.076	-55.755
0.10994	-61.829	-60.782	-58.888	-61.509	-58.655	-55.759
0.11014	-62.104	-61.026	-59.056	-61.735	-58.655	-55.914
0.11034	-61.997	-61.124	-59.114	-61.988	-59.177	-55.966
0.11054	-61.991	-60.733	-59.306	-61.897	-59.4	-56.277
0.11074	-61.948	-60.803	-59.2	-62.04	-59.455	-56.375
0.11094	-62.07	-61.111	-59.285	-61.784	-60.099	-56.702
0.11114	-62.296	-61.368	-58.879	-62.156	-59.8	-57.135
0.11134	-62.235	-61.868	-59.129	-61.814	-60.01	-57.373
0.11154	-62.348	-61.88	-59.175	-61.833	-59.873	-57.358
0.11174	-62.345	-61.6	-58.98	-61.866	-60.087	-57.501
0.11194	-62.134	-61.786	-58.547	-61.521	-59.727	-57.693
0.11214	-62.241	-61.798	-58.485	-61.686	-59.672	-57.91
0.11234	-62.406	-61.832	-58.635	-61.503	-59.421	-57.977
0.11254	-62.51	-62.268	-58.135	-60.993	-59.235	-58.096
0.11273	-62.397	-62.317	-57.585	-61.07	-59.412	-58.658
0.11293	-62.522	-62.408	-57.423	-61.064	-58.881	-58.737
0.11313	-62.458	-62.634	-57.53	-61.262	-58.518	-58.746
0.11333	-62.26	-62.549	-57.387	-61.28	-58.121	-59.314
0.11353	-62.43	-62.06	-57.463	-61.048	-58.008	-59.274
0.11373	-62.437	-62.466	-57.5	-60.929	-57.566	-59.045
0.11393	-62.342	-62.472	-58.012	-60.624	-57.493	-59.762
0.11413	-62.546	-62.729	-58.089	-60.707	-57.352	-59.79
0.11433	-62.623	-62.674	-58.122	-60.426	-57.517	-60
0.11453	-62.598	-62.613	-58.162	-60.417	-57.767	-60.211
0.11473	-62.568	-62.512	-58.208	-60.728	-58.167	-60.611
0.11493	-62.467	-62.686	-58.37	-60.417	-58.484	-60.297
0.11513	-62.357	-62.652	-58.409	-60.417	-58.967	-60.669
0.11533	-62.079	-62.588	-58.431	-60.374	-59.559	-60.757
0.11552	-62.021	-62.68	-58.299	-60.212	-59.891	-60.76
0.11572	-61.835	-62.689	-58.534	-60.16	-60.111	-60.913
0.11592	-61.484	-62.71	-58.348	-60.462	-59.995	-61.227
0.11612	-61.21	-62.698	-58.229	-60.313	-59.888	-61.569
0.11632	-61.124	-62.393	-58.269	-60.487	-59.785	-61.435
0.11652	-61.194	-62.372	-58.455	-60.423	-59.455	-61.453
0.11672	-61.487	-62.656	-58.342	-60.328	-59.342	-61.31
0.11692	-61.362	-62.787	-58.537	-60.337	-59.141	-61.743
0.11712	-61.298	-62.964	-58.47	-60.401	-59.254	-61.853
0.11732	-61.375	-62.82	-58.519	-60.154	-58.921	-62.097
0.11752	-60.993	-62.851	-58.385	-60.53	-58.787	-62.378
0.11772	-61.442	-62.778	-58.263	-60.618	-58.716	-62.469
0.11792	-61.176	-63.098	-58.296	-60.511	-58.314	-62.125
0.11811	-61.118	-63.061	-58.199	-60.551	-58.188	-62.439
0.11831	-61.088	-63.217	-58.495	-60.273	-58.46	-62.411
0.11851	-60.978	-63.138	-58.559	-60.2	-58.637	-62.524
0.11871	-61.042	-63.321	-58.33	-60.414	-58.738	-62.756
0.11891	-61.011	-63.376	-58.641	-60.609	-59.119	-62.918
0.11911	-61.246	-63.263	-58.76	-60.685	-59.452	-63.333
0.11931	-61.283	-63.132	-58.412	-60.667	-59.565	-63.455
0.11951	-61.121	-62.909	-58.464	-60.746	-60.154	-63.464
0.11971	-61.198	-63.312	-58.421	-60.981	-60.465	-63.01
0.11991	-61.539	-63.321	-58.012	-60.954	-60.798	-63.763
0.12011	-61.332	-63.382	-58.04	-60.481	-60.932	-63.788
0.12031	-61.057	-63.385	-58.382	-60.487	-61.048	-64.01
0.12051	-61.469	-63.257	-58.318	-60.996	-61.085	-64.31
0.12071	-61.243	-63.217	-58.568	-60.914	-61.201	-64.484
0.1209	-61.53	-63.385	-58.754	-60.966	-60.593	-64.169
0.1211	-61.552	-63.464	-58.757	-61.167	-60.352	-64.432
0.1213	-61.469	-63.29	-58.647	-61.057	-60.041	-64.508
0.1215	-61.622	-63.467	-58.656	-61.119	-60.2	-64.548
0.1217	-61.649	-63.455	-58.769	-61.283	-59.873	-64.706
0.1219	-61.82	-63.385	-58.974	-61.634	-59.812	-64.825
0.1221	-61.75	-63.391	-58.876	-61.433	-59.925	-65.045
0.1223	-61.716	-63.26	-59.114	-61.457	-59.995	-65.25
0.1225	-61.838	-63.351	-58.91	-61.808	-59.962	-65.109
0.1227	-61.899	-63.739	-59.026	-61.924	-60.013	-64.975
0.1229	-61.89	-63.574	-58.946	-61.9	-60.05	-65.448
0.1231	-61.948	-63.647	-58.998	-61.894	-60.135	-65.634
0.1233	-61.893	-63.611	-59.264	-61.836	-60.215	-65.405
0.1235	-61.902	-63.583	-59.49	-62.089	-59.791	-65.665
0.12369	-62.26	-63.62	-59.654	-62.165	-59.638	-65.683
0.12389	-62.223	-63.693	-59.575	-62.08	-59.391	-66.077
0.12409	-62.269	-63.357	-59.599	-62.419	-59.333	-65.896
0.12429	-62.223	-63.599	-59.898	-62.098	-59.052	-65.814
0.12449	-62.336	-63.971	-59.969	-62.367	-59.135	-66.003
0.12469	-62.43	-63.962	-60.005	-62.416	-59.51	-66.058
0.12489	-62.195	-64.145	-60.057	-62.309	-59.516	-66.104
0.12509	-62.189	-64.004	-60.21	-62.614	-59.519	-66.482
0.12529	-62.092	-63.861	-60.109	-62.763	-59.299	-66.205
0.12549	-62.003	-63.669	-60.143	-62.583	-59.11	-66.08
0.12569	-61.991	-64.172	-60.091	-62.818	-58.945	-65.933
0.12589	-62.128	-63.949	-60.237	-63.178	-58.417	-66.354
0.12609	-62.208	-64.081	-59.895	-63.005	-58.262	-66.238
0.12629	-62.302	-63.968	-60.35	-62.885	-58.143	-66.4
0.12648	-62.238	-64.114	-60.121	-63.401	-57.899	-66.55
0.12668	-62.083	-64.023	-59.895	-63.365	-58.082	-66.537
0.12688	-61.881	-63.959	-59.819	-63.267	-58.25	-66.376
0.12708	-61.628	-63.559	-59.828	-63.297	-58.61	-66.574
0.12728	-61.869	-64.072	-59.773	-63.151	-58.744	-66.067
0.12748	-61.841	-64.032	-59.911	-63.349	-59.232	-66.183
0.12768	-61.957	-63.852	-59.914	-63.151	-59.26	-66.553
0.12788	-61.893	-63.901	-59.789	-63.062	-59.864	-66.763
0.12808	-61.689	-64.01	-59.743	-63.603	-59.763	-66.547
0.12828	-61.414	-63.635	-59.92	-63.41	-59.91	-66.629
0.12848	-61.31	-63.702	-59.993	-63.612	-59.638	-66.531
0.12868	-61.307	-64.062	-59.996	-63.896	-59.165	-66.427
0.12888	-60.92	-63.772	-60.091	-63.828	-58.89	-66.815
0.12907	-60.798	-64.023	-60.286	-63.813	-58.863	-66.83
0.12927	-60.978	-63.937	-60.173	-64.286	-58.909	-67.135
0.12947	-61.118	-63.855	-60.063	-64.125	-59.104	-67.068
0.12967	-61.146	-63.94	-60.356	-64.012	-59.064	-67.065
0.12987	-61.057	-63.937	-60.234	-64.326	-59.177	-66.711
0.13007	-61.109	-63.812	-60.646	-64.485	-59.223	-66.965
0.13027	-61.198	-64.041	-60.814	-64.494	-59.424	-66.812
0.13047	-61.283	-63.989	-60.753	-64.573	-58.515	-67.02
0.13067	-61.39	-63.855	-60.5	-64.359	-58.201	-67.044
0.13087	-61.292	-63.986	-60.707	-64.045	-57.587	-67.224
0.13107	-61.042	-63.943	-60.89	-64.396	-57.444	-67.456
0.13127	-60.969	-63.998	-61.128	-64.408	-56.724	-67.151
0.13147	-60.865	-63.995	-61.131	-64.466	-56.931	-67.139
0.13167	-60.984	-63.943	-61.4	-64.549	-56.705	-67.053
0.13186	-60.978	-63.937	-61.519	-64.436	-56.727	-67.367
0.13206	-61.097	-63.907	-61.705	-64.234	-56.882	-67.48
0.13226	-60.947	-63.928	-61.635	-64.308	-56.47	-67.752
0.13246	-60.862	-64.035	-61.476	-64.247	-55.662	-67.612
0.13266	-60.901	-64.123	-61.845	-64.387	-54.581	-67.618
0.13286	-61.182	-64.239	-61.723	-64.625	-54.001	-67.37
0.13306	-61.127	-64.126	-62.16	-64.564	-53.684	-67.605
0.13326	-61.323	-64.151	-62.163	-64.829	-53.599	-66.968
0.13346	-61.304	-64.209	-62.248	-64.756	-53.904	-67.187
0.13366	-61.216	-64.194	-62.303	-64.555	-53.785	-67.221
0.13386	-61.118	-64.267	-62.242	-64.247	-53.69	-67.691
0.13406	-61.066	-64.178	-62.074	-64.591	-53.785	-67.45
0.13426	-61.03	-64.102	-62.123	-64.622	-53.94	-67.273
0.13446	-61.185	-64.419	-62.099	-64.884	-54.011	-67.212
0.13465	-61.039	-63.901	-62.065	-64.826	-54.005	-67.047
0.13485	-61.167	-64.203	-61.937	-64.714	-54.096	-67.41
0.13505	-61.182	-64.346	-62.151	-64.796	-53.776	-67.459
0.13525	-61.082	-64.377	-61.946	-64.842	-53.574	-67.636
0.13545	-61.313	-64.468	-61.531	-64.28	-53.94	-67.764
0.13565	-61.402	-64.41	-61.562	-64.546	-54.368	-67.551
0.13585	-61.603	-64.105	-61.235	-64.891	-54.658	-67.535
0.13605	-61.463	-64.038	-60.756	-64.86	-54.963	-67.309
0.13625	-61.591	-64.12	-60.423	-64.741	-55.024	-66.98
0.13645	-61.661	-64.212	-60.371	-64.744	-55.054	-67.471
0.13665	-61.429	-64.099	-60.527	-64.317	-54.969	-67.486
0.13685	-61.35	-64.169	-60.268	-64.186	-54.822	-67.456
0.13705	-61.75	-64.093	-59.929	-64.601	-54.691	-67.538
0.13725	-61.375	-64.102	-59.706	-64.253	-54.276	-67.682
0.13744	-61.5	-63.904	-59.477	-64.414	-53.782	-67.358
0.13764	-61.118	-63.342	-59.068	-64.665	-53.712	-67.593
0.13784	-61.28	-63.544	-58.855	-64.448	-53.626	-67.514
0.13804	-61.014	-63.772	-59.154	-64.811	-53.04	-67.593
0.13824	-61.179	-63.983	-59.059	-64.497	-52.503	-67.657
0.13844	-61.146	-64.072	-59.48	-64.247	-52.28	-67.715
0.13864	-61.106	-63.742	-59.563	-64.582	-52.625	-67.37
0.13884	-61.198	-63.364	-59.718	-64.662	-52.943	-67.615
0.13904	-60.981	-63.672	-59.889	-64.796	-53.086	-67.505
0.13924	-61.127	-63.556	-60.158	-64.665	-53.751	-67.23
0.13944	-60.92	-63.791	-60.201	-64.753	-54.136	-67.48
0.13964	-60.929	-63.748	-60.393	-64.71	-54.359	-67.66
0.13984	-60.844	-63.605	-60.353	-64.982	-54.203	-67.947
0.14003	-60.795	-63.531	-60.527	-64.842	-54.221	-67.914
0.14023	-60.786	-63.785	-60.701	-64.945	-54.279	-67.667
0.14043	-60.734	-63.763	-60.652	-65.025	-54.325	-67.285
0.14063	-60.502	-63.183	-60.628	-64.964	-54.233	-67.496
0.14083	-60.633	-63.812	-60.786	-64.811	-54.145	-67.935
0.14103	-60.462	-63.803	-61.07	-64.762	-53.779	-67.816
0.14123	-60.49	-63.87	-61.15	-64.454	-53.519	-67.844
0.14143	-60.642	-64.111	-61.147	-64.46	-53.092	-67.761
0.14163	-60.557	-63.867	-60.884	-64.842	-53.04	-67.59
0.14183	-60.914	-63.751	-61.043	-64.808	-52.872	-67.609
0.14203	-60.877	-63.431	-60.814	-65.055	-52.549	-67.694
0.14223	-60.822	-64.01	-61.174	-64.762	-52.711	-67.508
0.14243	-61.112	-63.84	-61.247	-64.869	-53.019	-67.724
0.14263	-61.109	-64.02	-61.192	-64.726	-53.098	-67.63
0.14282	-61.399	-64.007	-61.241	-64.637	-53.406	-67.523
0.14302	-61.722	-63.843	-61.589	-64.61	-53.522	-67.615
0.14322	-61.817	-64.145	-61.4	-64.778	-53.727	-67.428
0.14342	-61.991	-63.73	-61.495	-64.735	-53.733	-67.148
0.14362	-62	-63.428	-61.568	-64.851	-53.895	-67.651
0.14382	-62.189	-63.766	-61.491	-64.866	-54.319	-67.502
0.14402	-62.272	-63.925	-61.546	-64.729	-54.819	-67.374
0.14422	-62.479	-64.02	-61.537	-64.546	-55.271	-67.117
0.14442	-62.4	-64.209	-61.522	-64.668	-55.628	-67.285
0.14462	-62.684	-64.16	-61.589	-65.034	-56.214	-67.044
0.14482	-62.549	-63.876	-61.794	-64.887	-56.479	-67.37
0.14502	-62.717	-63.849	-61.702	-64.86	-56.782	-67.187
0.14522	-62.852	-63.785	-61.937	-64.903	-56.922	-66.943
0.14542	-62.787	-63.968	-61.94	-64.762	-57.285	-67.258
0.14561	-63.004	-64.081	-61.729	-64.796	-56.904	-67.334
0.14581	-63.038	-64.166	-61.748	-64.61	-56.666	-67.23
0.14601	-62.958	-64.398	-61.757	-64.552	-56.223	-67.48
0.14621	-62.873	-64.218	-61.879	-64.869	-55.701	-67.523
0.14641	-63.102	-64.01	-61.815	-64.796	-55.591	-67.432
0.14661	-63.126	-63.943	-61.806	-64.759	-55.381	-67.523
0.14681	-63.273	-64.194	-61.635	-64.808	-54.92	-67.465
0.14701	-63.077	-64.209	-61.464	-64.656	-54.52	-67.374
0.14721	-62.906	-64.23	-61.244	-64.454	-54.487	-67.569
0.14741	-63.212	-64.407	-61.125	-64.75	-54.417	-67.67
0.14761	-63.178	-64.102	-61.348	-64.585	-54.398	-67.505
0.14781	-63.355	-64.053	-61.525	-64.546	-54.59	-67.724
0.14801	-63.438	-64.377	-61.43	-64.405	-54.713	-67.569
0.14821	-63.477	-64.065	-61.617	-64.723	-54.984	-67.16
0.1484	-63.627	-64.072	-61.488	-64.732	-54.539	-67.474
0.1486	-63.425	-64.059	-61.778	-64.848	-53.995	-67.66
0.1488	-63.398	-64.392	-61.754	-64.448	-52.979	-67.679
0.149	-63.428	-64.484	-61.696	-64.338	-52.213	-67.85
0.1492	-63.508	-64.38	-62.026	-64.924	-51.917	-67.691
0.1494	-63.251	-64.117	-61.995	-64.561	-51.758	-67.605
0.1496	-63.178	-64.05	-61.815	-64.555	-51.847	-67.627
0.1498	-63.035	-64.16	-61.717	-64.619	-52.274	-67.251
0.15	-63.135	-64.392	-61.693	-64.54	-52.689	-67.496
0.1502	-63.215	-64.255	-61.742	-64.424	-53.26	-67.59
0.1504	-63.441	-64.331	-61.806	-64.466	-53.287	-67.511
0.1506	-63.193	-64.41	-61.708	-64.594	-53.687	-67.38
0.1508	-63.203	-64.316	-61.958	-64.588	-53.455	-67.85
0.15099	-63.215	-64.337	-62.022	-64.482	-53.339	-67.401
0.15119	-63.181	-64.038	-62.145	-64.335	-53.489	-67.142
0.15139	-63.117	-64.377	-62.099	-64.518	-53.873	-67.331
0.15159	-63.148	-64.453	-62.273	-64.533	-53.971	-67.242
0.15179	-63.157	-64.74	-62.187	-64.411	-53.834	-67.456
0.15199	-63.276	-64.593	-62.178	-64.424	-53.614	-67.3
0.15219	-62.946	-64.551	-62.3	-64.613	-53.562	-67.264
0.15239	-63.087	-64.395	-62.224	-64.396	-53.553	-67.291
0.15259	-62.983	-64.703	-61.885	-64.585	-53.95	-67.493
0.15279	-62.995	-64.715	-62.077	-64.588	-53.895	-67.227
0.15299	-63.239	-64.715	-62.05	-64.46	-53.898	-67.45
0.15319	-63.422	-64.841	-61.931	-64.408	-54.258	-67.255
0.15339	-63.26	-64.685	-61.757	-64.485	-54.267	-67.471
0.15359	-63.068	-65.002	-61.763	-64.207	-54.545	-67.563
0.15378	-63.013	-65.259	-61.949	-64.366	-54.243	-67.563
0.15398	-63.093	-64.627	-61.931	-64.308	-54.005	-67.071
0.15418	-63.016	-64.56	-61.873	-64.463	-53.977	-66.995
0.15438	-63.047	-64.88	-61.931	-64.601	-54.044	-67.367
0.15458	-63.315	-64.987	-61.61	-64.494	-54.218	-67.38
0.15478	-63.502	-64.896	-61.253	-64.277	-54.581	-67.63
0.15498	-63.23	-65.045	-61.122	-64.225	-54.868	-67.383
0.15518	-63.55	-65.054	-61.174	-64.189	-55.366	-67.135
0.15538	-63.495	-65.03	-61.037	-63.993	-55.634	-67.169
0.15558	-63.56	-65.13	-61.141	-64.042	-55.952	-67.377
0.15578	-63.633	-65.1	-61.113	-63.963	-55.988	-67.09
0.15598	-63.547	-65.091	-61.028	-63.612	-55.961	-67.34
0.15618	-63.407	-65.323	-60.735	-63.487	-55.518	-67.456
0.15638	-63.401	-65.521	-61.095	-63.185	-54.972	-67.316
0.15657	-63.438	-65.423	-61.031	-62.995	-54.542	-67.453
0.15677	-63.392	-65.661	-61.159	-63.325	-54.291	-67.187
0.15697	-63.303	-65.277	-60.683	-63.117	-54.584	-67.05
0.15717	-63.355	-65.146	-60.832	-63.264	-54.81	-66.8
0.15737	-63.569	-65.353	-60.472	-63.423	-54.847	-67.206
0.15757	-63.486	-65.46	-60.365	-63.258	-54.49	-67.374
0.15777	-63.456	-65.661	-60.478	-63.075	-54.85	-67.41
0.15797	-63.666	-65.631	-60.536	-63.389	-54.951	-67.258
0.15817	-63.657	-65.597	-60.469	-63.313	-55.146	-67.032
0.15837	-63.737	-65.723	-60.494	-63.236	-55.164	-67.239
0.15857	-64.033	-65.832	-60.646	-63.279	-55.268	-67.248
0.15877	-63.773	-65.625	-60.722	-63.194	-55.192	-66.852
0.15897	-63.74	-65.802	-60.722	-63.618	-55.445	-67.309
0.15917	-63.999	-66.104	-60.844	-63.417	-55.472	-67.184
0.15936	-64.124	-66.18	-61.174	-63.081	-55.994	-67.322
0.15956	-64.28	-66.113	-60.954	-62.907	-56.238	-67.273
0.15976	-64.255	-66.22	-61.131	-63.288	-56.159	-67.053
0.15996	-64.265	-66.327	-61.519	-63.252	-55.689	-66.934
0.16016	-64.249	-66.098	-61.171	-63.526	-55.613	-66.812
0.16036	-64.286	-66.373	-61.266	-63.584	-55.778	-67.108
0.16056	-64.109	-66.25	-61.314	-63.523	-56.086	-67.056
0.16076	-64.277	-66.247	-61.394	-63.188	-56.342	-67.099
0.16096	-64.304	-66.553	-61.482	-63.395	-56.592	-67.169
0.16116	-64.365	-66.543	-61.339	-63.062	-56.87	-66.794
0.16136	-64.557	-66.434	-61.369	-63.557	-56.974	-66.894
0.16156	-64.466	-66.589	-61.186	-63.78	-56.684	-66.885
0.16176	-64.46	-66.278	-61.15	-63.74	-56.556	-66.873
0.16195	-64.509	-66.565	-61.406	-63.941	-56.58	-67.096
0.16215	-64.847	-66.775	-61.067	-63.731	-56.428	-67.02
0.16235	-64.832	-66.705	-61.345	-63.709	-56.086	-67.224
0.16255	-64.46	-66.83	-61.617	-63.38	-55.701	-67.114
0.16275	-64.39	-66.815	-61.336	-63.545	-55.277	-66.913
0.16295	-64.24	-66.629	-61.388	-63.703	-54.935	-66.843
0.16315	-63.849	-66.467	-61.534	-63.911	-54.337	-66.696
0.16335	-63.743	-66.626	-61.672	-63.67	-53.846	-67.05
0.16355	-63.81	-66.745	-61.836	-63.81	-53.69	-67.297
0.16375	-63.874	-66.888	-61.8	-63.828	-53.718	-67.3
0.16395	-63.666	-66.901	-62.047	-63.667	-53.843	-66.855
0.16415	-63.676	-66.571	-61.949	-63.621	-54.053	-67.081
0.16435	-63.615	-66.907	-61.852	-63.639	-54.45	-67.154
0.16455	-63.569	-67.288	-61.983	-63.734	-54.636	-66.971
0.16474	-63.505	-66.763	-62.203	-63.886	-55.088	-66.864
0.16494	-63.3	-66.754	-62.044	-63.709	-55.448	-67.132
0.16514	-63.157	-66.638	-62.181	-63.731	-55.659	-67.175
0.16534	-63.151	-66.901	-61.934	-63.404	-55.869	-67.184
0.16554	-62.922	-66.586	-61.708	-63.722	-56.104	-67.074
0.16574	-63.212	-66.458	-61.641	-63.59	-56.04	-67.026
0.16594	-63.102	-66.266	-61.549	-63.828	-56.132	-66.839
0.16614	-63.178	-66.397	-61.757	-63.89	-55.839	-66.904
0.16634	-63.154	-66.69	-61.803	-63.835	-56.04	-67.074
0.16654	-63.038	-66.559	-61.815	-63.899	-55.924	-67.175
0.16674	-63.038	-66.623	-61.9	-63.96	-55.756	-67.312
0.16694	-63.05	-66.476	-62.108	-63.542	-55.845	-67.206
0.16714	-63.077	-66.385	-62.029	-63.41	-56.354	-67.029
0.16734	-62.989	-66.495	-61.983	-63.725	-56.299	-67.035
0.16753	-62.839	-66.662	-62.059	-64.161	-56.168	-66.852
0.16773	-62.763	-66.479	-62.05	-63.902	-55.64	-66.681
0.16793	-62.83	-66.559	-62.196	-63.774	-55.842	-66.928
0.16813	-62.699	-66.913	-62.196	-63.761	-56	-66.94
0.16833	-62.836	-66.739	-62.206	-63.615	-56.223	-67.09
0.16853	-62.852	-66.791	-62.343	-63.96	-56.516	-66.962
0.16873	-62.586	-66.858	-62.416	-64.048	-56.995	-66.943
0.16893	-62.934	-66.507	-62.306	-64.17	-56.766	-66.69
0.16913	-62.974	-66.608	-61.888	-64.073	-56.794	-66.922
0.16933	-62.592	-66.577	-61.775	-64.173	-56.69	-66.983
0.16953	-62.855	-66.952	-61.452	-64.247	-56.812	-67.096
0.16973	-62.855	-66.891	-61.421	-64.234	-57.114	-66.919
0.16993	-62.888	-66.864	-61.498	-63.874	-57.355	-66.681
0.17013	-62.845	-66.998	-61.589	-64.265	-57.752	-66.742
0.17032	-62.961	-66.757	-61.302	-64.585	-57.822	-66.763
0.17052	-62.693	-66.876	-61.006	-64.762	-57.914	-66.556
0.17072	-62.852	-66.571	-60.918	-64.823	-58.359	-66.543
0.17092	-62.665	-66.955	-60.912	-64.582	-58.817	-66.879
0.17112	-62.916	-67.224	-60.835	-64.842	-59.028	-66.614
0.17132	-62.964	-67.166	-60.567	-64.936	-59.199	-67.062
0.17152	-62.885	-67.102	-61.058	-65.306	-58.97	-66.946
0.17172	-62.803	-67.084	-60.918	-65.138	-59.254	-66.815
0.17192	-62.592	-66.791	-61.052	-65.382	-59.33	-66.586
0.17212	-62.623	-66.882	-61.092	-65.428	-59.519	-66.907
0.17232	-62.623	-67.132	-61.293	-65.544	-59.489	-66.983
0.17252	-62.69	-67.227	-61.531	-65.101	-60.05	-67.065
0.17272	-62.824	-67.215	-61.412	-65.345	-60.538	-66.955
0.17291	-62.775	-67.227	-61.803	-65.138	-60.618	-66.876
0.17311	-62.888	-67.197	-61.76	-65.37	-60.959	-67.187
0.17331	-62.873	-67.447	-61.687	-65.205	-61.039	-67.166
0.17351	-62.992	-67.215	-61.62	-65.336	-60.993	-66.958
0.17371	-63.175	-67.035	-61.574	-65.345	-60.798	-66.98
0.17391	-63.343	-67.181	-61.748	-65.254	-60.126	-67.096
0.17411	-63.401	-67.404	-61.531	-65.522	-59.812	-67.142
0.17431	-63.102	-67.508	-61.607	-65.431	-59.186	-67.175
0.17451	-63.383	-67.52	-61.665	-65.312	-58.274	-67.093
0.17471	-63.224	-67.352	-61.675	-65.367	-57.386	-67.212
0.17491	-63.343	-67.251	-61.528	-65.641	-56.812	-66.986
0.17511	-63.441	-67.306	-61.232	-65.705	-56.653	-67.218
0.17531	-63.315	-67.386	-61.226	-65.534	-57.044	-67.123
0.17551	-63.364	-67.438	-60.973	-65.577	-57.313	-67.084
0.1757	-63.663	-67.676	-60.802	-65.342	-57.77	-66.946
0.1759	-63.563	-67.584	-61.031	-65.437	-57.743	-67.02
0.1761	-63.7	-67.422	-61.29	-65.8	-58.018	-66.931
0.1763	-63.587	-67.544	-61.232	-65.565	-58.411	-67.02
0.1765	-63.557	-67.398	-61.144	-65.69	-58.756	-66.699
0.1767	-63.291	-67.377	-61.067	-65.528	-58.762	-66.708
0.1769	-63.499	-67.654	-60.854	-65.833	-59.199	-66.937
0.1771	-63.602	-67.651	-60.597	-65.763	-59.363	-67.203
0.1773	-63.389	-67.877	-60.597	-65.776	-59.37	-66.952
0.1775	-63.242	-67.798	-60.28	-65.373	-59.357	-67.114
0.1777	-63.355	-67.77	-60.512	-65.583	-59.446	-67.221
0.1779	-63.611	-67.401	-60.704	-65.812	-59.199	-66.934
0.1781	-63.459	-67.639	-60.619	-65.705	-58.802	-67.078
0.1783	-63.26	-67.554	-60.887	-65.711	-58.75	-67.096
0.17849	-63.63	-67.718	-60.701	-65.357	-58.961	-67.084
0.17869	-63.264	-67.486	-60.457	-65.241	-58.884	-66.894
0.17889	-63.318	-67.755	-60.405	-65.116	-59.196	-66.983
0.17909	-63.239	-67.737	-60.381	-65.22	-59.232	-67.078
0.17929	-63.175	-67.731	-60.402	-64.958	-59.336	-67.074
0.17949	-63.318	-67.508	-60.396	-65.476	-59.473	-66.806
0.17969	-63.489	-67.572	-60.21	-65.257	-59.351	-66.638
0.17989	-63.807	-67.694	-60.109	-65.309	-59.119	-66.803
0.18009	-63.52	-67.819	-60.085	-65.269	-58.762	-66.971
0.18029	-63.898	-67.883	-60.017	-65.388	-58.237	-67.071
0.18049	-63.874	-67.883	-60.326	-65.574	-57.599	-66.965
0.18069	-63.691	-67.874	-60.164	-65.293	-57.294	-66.934
0.18089	-63.785	-67.737	-60.225	-65.592	-57.096	-66.977
0.18109	-64.005	-68.008	-60.429	-65.55	-57.096	-66.83
0.18128	-63.569	-67.706	-60.32	-65.519	-56.742	-66.647
0.18148	-63.508	-68.051	-60.146	-65.721	-56.605	-66.794
0.18168	-63.746	-67.975	-60.265	-65.376	-56.327	-66.693
0.18188	-63.663	-68.106	-60.429	-65.525	-56.394	-66.876
0.18208	-63.724	-68.014	-60.344	-65.544	-56.434	-66.922
0.18228	-63.572	-67.871	-60.411	-65.528	-56.385	-66.888
0.18248	-63.715	-67.667	-60.216	-65.69	-56.748	-66.434
0.18268	-63.636	-67.526	-60.039	-65.864	-56.986	-66.717
0.18288	-63.593	-67.773	-60.106	-65.693	-56.791	-66.601
0.18308	-63.788	-67.584	-60.039	-65.69	-57.194	-66.55
0.18328	-63.685	-67.917	-59.825	-65.721	-57.175	-66.952
0.18348	-63.73	-67.795	-59.715	-65.586	-56.989	-66.91
0.18368	-63.935	-67.84	-59.786	-65.751	-56.678	-66.815
0.18387	-64.091	-67.932	-59.599	-65.699	-56.724	-66.901
0.18407	-64.054	-67.728	-59.682	-65.65	-56.705	-66.69
0.18427	-64.167	-67.581	-59.627	-65.544	-56.855	-66.611
0.18447	-64.066	-67.782	-59.633	-65.498	-57.087	-67.05
0.18467	-64.17	-67.773	-59.502	-65.44	-57.361	-66.788
0.18487	-64.139	-67.532	-59.532	-65.467	-57.377	-67.093
0.18507	-64.112	-67.557	-59.45	-65.388	-57.654	-66.946
0.18527	-64.265	-67.19	-59.468	-65.101	-58.036	-66.885
0.18547	-64.231	-67.139	-59.523	-65.406	-58.048	-66.522
0.18567	-64.246	-67.193	-59.657	-65.339	-58.741	-66.797
0.18587	-64.194	-67.264	-59.67	-65.422	-58.68	-67.062
0.18607	-64.438	-67.129	-59.715	-65.476	-58.661	-67.16
0.18627	-64.448	-67.276	-59.459	-65.638	-58.747	-67.303
0.18647	-64.454	-67.322	-59.639	-65.351	-58.979	-67.178
0.18666	-64.506	-67.401	-59.169	-65.403	-58.866	-67.145
0.18686	-64.42	-67.264	-59.309	-65.589	-58.567	-67.145
0.18706	-64.487	-67.218	-58.742	-65.76	-58.033	-67.184
0.18726	-64.417	-66.904	-58.51	-65.534	-57.743	-67.044
0.18746	-64.557	-67.2	-58.626	-65.489	-57.789	-67.19
0.18766	-64.619	-67.135	-58.769	-65.748	-57.627	-67.251
0.18786	-64.451	-67.367	-58.949	-65.656	-57.572	-67.471
0.18806	-64.515	-67.319	-58.913	-65.565	-57.596	-67.593
0.18826	-64.628	-67.193	-59.111	-65.403	-57.45	-67.169
0.18846	-64.561	-67.065	-59.688	-65.846	-57.679	-67.074
0.18866	-64.731	-67.343	-59.374	-66.053	-57.752	-67.135
0.18886	-64.594	-67.096	-59.599	-66.078	-57.7	-67.197
0.18906	-64.609	-67.401	-59.859	-65.922	-57.34	-67.572
0.18926	-64.768	-67.175	-59.847	-66.16	-57.456	-67.834
0.18945	-64.31	-67.184	-59.987	-65.959	-57.92	-67.511
0.18965	-64.161	-67.358	-60.167	-65.757	-57.734	-67.602
0.18985	-64.295	-67.569	-60.35	-65.821	-57.941	-67.572
0.19005	-64.454	-67.148	-60.198	-66.331	-58.152	-67.465
0.19025	-64.49	-66.995	-60.094	-66.343	-58.396	-67.334
0.19045	-64.579	-67.486	-59.984	-66.398	-58.524	-67.645
0.19065	-64.542	-67.273	-59.959	-66.593	-58.851	-67.743
0.19085	-64.384	-67.447	-60.014	-66.538	-59.171	-67.905
0.19105	-64.219	-67.416	-60.31	-65.971	-59.25	-67.859
0.19125	-64.387	-67.602	-60.381	-66.279	-59.608	-67.435
0.19145	-64.374	-67.401	-60.594	-66.386	-59.769	-67.294
0.19165	-64.597	-67.364	-60.777	-66.31	-60.093	-67.45
0.19185	-64.332	-67.367	-60.75	-66.371	-59.855	-67.779
0.19205	-64.402	-67.419	-60.854	-66.444	-59.91	-68.057
0.19224	-64.39	-67.541	-60.945	-66.273	-59.653	-67.734
0.19244	-64.399	-67.462	-61.266	-66.426	-59.781	-67.581
0.19264	-64.573	-67.569	-61.263	-66.175	-59.446	-67.859
0.19284	-64.487	-67.334	-61.449	-65.888	-59.479	-68.03
0.19304	-64.634	-67.462	-61.51	-66.31	-59.736	-67.795
0.19324	-64.805	-67.123	-61.794	-66.502	-59.785	-67.877
0.19344	-64.869	-67.453	-61.726	-66.761	-60.291	-67.844
0.19364	-64.631	-67.456	-61.986	-66.657	-60.041	-68.036
0.19384	-64.713	-67.566	-62.013	-66.603	-60.349	-67.947
0.19404	-64.75	-67.474	-62.029	-66.545	-60.514	-67.767
0.19424	-65.079	-67.3	-62.172	-66.767	-60.496	-67.779
0.19444	-64.936	-67.407	-62.23	-67.127	-60.065	-67.645
0.19464	-64.93	-67.639	-61.919	-67.097	-59.479	-67.92
0.19483	-65.064	-67.544	-61.501	-67.036	-58.637	-67.85
0.19503	-65.259	-67.511	-61.507	-66.944	-57.966	-68.017
0.19523	-64.963	-67.41	-61.65	-67.341	-58.121	-68.225
0.19543	-64.945	-67.483	-61.733	-67.546	-58.207	-67.95
0.19563	-65.238	-67.526	-61.83	-67.057	-58.588	-67.816
0.19583	-64.908	-67.505	-61.91	-67.045	-58.518	-68.027
0.19603	-64.924	-67.108	-62.087	-67.549	-59.098	-68.002
0.19623	-64.802	-67.126	-61.964	-67.207	-59.308	-67.813
0.19643	-64.68	-67.389	-62.157	-67.43	-59.733	-68.286
0.19663	-64.237	-67.822	-62.282	-67.631	-59.748	-68.295
0.19683	-64.124	-67.496	-62.282	-67.127	-59.843	-68.338
0.19703	-64.149	-67.422	-62.474	-67.063	-59.479	-68.078
0.19723	-63.877	-67.209	-62.328	-67.106	-58.875	-67.804
0.19743	-63.59	-67.355	-62.532	-67.03	-58.726	-67.734
0.19762	-63.221	-67.471	-62.364	-67.256	-58.698	-68.301
0.19782	-63.239	-67.288	-62.16	-67.411	-58.411	-68.036
0.19802	-63.126	-67.337	-62.315	-67.231	-58.57	-68.375
0.19822	-63.438	-67.721	-62.41	-67.64	-58.414	-68.219
0.19842	-63.572	-67.447	-62.065	-67.588	-58.259	-67.944
0.19862	-63.257	-67.602	-62.01	-67.347	-57.557	-68.097
0.19882	-63.328	-67.584	-62.117	-67.61	-56.418	-67.831
0.19902	-63.52	-67.245	-61.781	-67.884	-55.564	-67.84
0.19922	-63.401	-67.401	-62.004	-67.808	-54.728	-68.075
0.19942	-63.346	-67.709	-62.19	-67.744	-54.453	-68.347
0.19962	-63.392	-67.773	-62.129	-67.6	-54.127	-68.375
0.19982	-63.615	-67.987	-62.056	-67.027	-53.8	-67.898

## Sheet: Fig2-S2B
0
0
0
0
0
0
0
0
0
0
0
0
0
0
0
0
-1
0
0
0
0
0
-1
0
0
0
0
0
-1
0
-2
0
0
-2
-2
0
-2
0
-1
-1
-2
0
-3
0
0
0
-2
0
-2
0
0
1
2
-1
-1
0
0
1
-2
0
0
0
0
0
-1
0
0
0
0
0
0
-2
1
0
0

## Sheet: Fig2-S2C
0.81586
1.7159
3.178
-0.49546
-0.087746
-0.56759
-2.5349
-1.7791
-0.8798
-1.647
-0.81082
-0.72958
0.70015
-2.6237
-0.83548
1.089
-0.38852
1.807
-1.7684
-3.5208
0.96319
2.0272
0.27265
-1.7781
-2.4594
5.8994
-5.3102
-8.2452
1.7235
-0.096654
-3.9946
-0.14066
-2.0605
-0.929
-3.5557
6.5166
-4.7486
-4.583
-0.043987
-2.1248
-0.62543
1.0798
0.91541
-0.24824
-5.6956
7.1997
-3.2615
-3.278
-0.46869
-1.2521
4.5112
3.7995
-1.8968
1.5563
-0.58904
-0.97382
-4.9635
-7.3954
-1.1463
-3.4695
-1.4848
0.2376
1.6765
-2.1504
-1.6037
4.6929
-3.7132
-5.7776
-0.39912
-3.5913
2.3023
3.0946
2.0464
-0.081366
1.3293
9.5863
-1.8099
-3.9309
0.43146
-0.35582
-3.1257
-3.7607
2.3267
0.88952
-1.4746
11.527
7.562
-5.2976
-1.6636
-2.6697
7.9295
4.2249
2.9575
2.5743
0.40692
10.392
6.5907
-1.6139
2.9042
-2.1185
8.3474
-1.6863
-0.98309
2.2599
0.13624
0.14898
1.0698
-4.9466
1.0457
-0.69965
12.021
1.7142
2.53
0.083338
-3.2723
0.52781
7.677
-3.7649
-0.47485
-3.5825
11.791
1.2205
2.5964
2.8257
0.5563

## Sheet: Fig2-S2D
0	60.861	98.331	84.028	71.827	71.697	78.105	81.695	90.834	102.65	84.244	90.74	71.098	77.468	74.809	71.966	61.391	73.121	104.36	85.371	90.138
6.8534	71.155	NaN	NaN	80.535	86.68	103.75	84.289	NaN	NaN	NaN	110.7	NaN	NaN	71.6	67.346	76.238	69.916	NaN	NaN	NaN
36.218	75.78	NaN	NaN	113.17	106.23	100.4	94.671	NaN	NaN	NaN	118.07	NaN	NaN	89.615	61.634	76.872	70.596	NaN	NaN	NaN
84.185	111.11	NaN	104.03	135.29	116.25	137.75	103.47	NaN	NaN	NaN	110.18	NaN	84.443	79.831	87.894	82.485	87	NaN	NaN	NaN
92.353	114.97	NaN	115.03	144.25	116.03	130.19	107.8	NaN	NaN	NaN	126.63	NaN	83.4	95.358	70.69	100.92	87.681	NaN	NaN	NaN
100	129.59	144.14	144.86	148.76	127.1	128.98	131.12	143.25	159.25	157.71	108.82	97.082	92.112	91.215	57.683	114.26	85.265	103.2	141.19	149.43
100	97.889	126.61	154.48	152.94	137.35	87.625	109.65	106.84	146.97	158.18	108.72	75.337	48.35	100.69	72.155	65.767	69.477	47.756	96.824	122.76

## Sheet: Fig2-S2E
0.37013	0.15087
0.34162	-0.28905
0.50426	0.33588
0.73666	0.45913
0.52469	-0.057823
0.74188	0.1946
0.48638	0.022897
0.30944	0.24754
0.34056	0.11649
0.5332	0.11585

## Sheet: Fig2-S2F
0.079018	0.010836
0.17732	0.065057
0.31859	0.21212
0.17313	0.21052
0.13929	0.059031
0.15937	0.11748
0.20621	-0.0024061

## Sheet: Fig2-S2G
20	26.994	21.169
50	39.326	49.103
80	52.008	47.686
