# Supplementary material for: Biophysics of object segmentation in a collision-detecting neuron
Source: eLife. 2018 Apr 18;7:e34238. doi: 10.7554/eLife.34238 (PMC5947989; doi:10.7554/eLife.34238)
Supplement: Figure 3—source data 1. [file elife-34238-fig3-data1.xlsx]

## Sheet: Fig3A
53.333	25.298	38.242	19.375
50	6.25	28.571	6.25
60	38.095	44.103	33.125

## Sheet: Fig3B
-2.9999	2.4016	8.0049	7.3581	10.255	0	0	0.016507	0.12353
-2.9995	2.431	8.104	7.3584	10.217	0	0	0.017435	0.13047
-2.9991	2.4607	8.2054	7.3594	10.183	0	0	0.018408	0.13776
-2.9987	2.4906	8.3092	7.3613	10.153	0	0	0.019428	0.14538
-2.9983	2.5207	8.4153	7.3639	10.126	0	0	0.020495	0.15337
-2.9979	2.551	8.5237	7.3571	10.081	0	0	0.021613	0.16174
-2.9975	2.5815	8.6341	7.3619	10.063	0	0	0.022783	0.17049
-2.9971	2.6121	8.7466	7.3573	10.028	0	0	0.024006	0.17964
-2.9967	2.6429	8.8612	7.3642	10.018	0	0	0.025285	0.18921
-2.9963	2.6789	8.9788	7.3717	10.011	0	0	0.026621	0.19921
-2.9959	2.7102	9.0974	7.381	10.024	0	0	0.028017	0.20966
-2.9955	2.7416	9.2177	7.391	10.026	0	0	0.029474	0.22056
-2.9951	2.7684	9.3237	7.4017	10.03	0	0	0.030994	0.23194
-2.9947	2.8003	9.4488	7.413	10.036	0	0	0.03258	0.24381
-2.9943	2.8323	9.5753	7.4249	10.046	0	0	0.034233	0.25618
-2.9939	2.8643	9.7032	7.4374	10.058	0	0	0.035956	0.26907
-2.9935	2.8963	9.8324	7.4504	10.073	0	0	0.037751	0.2825
-2.9931	2.9283	9.9628	7.4639	10.09	0	0	0.039619	0.29648
-2.9927	2.9603	10.094	7.478	10.109	0	0	0.041563	0.31103
-2.9923	2.9923	10.227	7.4925	10.13	0	0	0.051761	0.32719
-2.9919	3.0242	10.361	7.5075	10.153	0	0	0.054365	0.34306
-2.9915	3.0561	10.495	7.5228	10.179	0	0	0.057079	0.35956
-2.9911	3.0879	10.631	7.5386	10.206	0	0	0.059905	0.3767
-2.9907	3.1196	10.767	7.5547	10.234	0	0	0.062847	0.39451
-2.9903	3.1512	10.904	7.5712	10.264	0	0	0.065909	0.413
-2.9899	3.1827	11.041	7.5989	10.288	0	0	0.069094	0.43218
-2.9895	3.214	11.179	7.6165	10.32	0	0	0.072405	0.45208
-2.9891	3.2452	11.318	7.6345	10.353	0	0	0.075847	0.47272
-2.9887	3.2762	11.456	7.6527	10.388	0	0	0.079422	0.4941
-2.9883	3.307	11.595	7.671	10.423	0	0	0.083134	0.51625
-2.9879	3.3376	11.735	7.6794	10.444	0	0	0.086987	0.53918
-2.9875	3.368	11.874	7.6987	10.482	0	0	0.090984	0.56291
-2.9871	3.3981	12.013	7.718	10.521	0	0	0.095129	0.58746
-2.9867	3.428	12.152	7.7373	10.559	0	0	0.099425	0.61284
-2.9863	3.4576	12.291	7.7566	10.598	0	0	0.10388	0.63907
-2.9859	3.4869	12.43	7.7867	10.648	0	0	0.10849	0.66616
-2.9855	3.516	12.568	7.8066	10.689	0	0	0.11326	0.69414
-2.9851	3.5447	12.706	7.8263	10.729	0	0	0.11819	0.723
-2.9847	3.573	12.844	7.8459	10.769	0	0	0.1233	0.75278
-2.9843	3.601	12.98	7.8653	10.809	0	0	0.12858	0.78349
-2.9839	3.6239	13.111	7.8846	10.848	0	0	0.13403	0.81513
-2.9835	3.6514	13.247	7.9036	10.887	0	0	0.13966	0.84772
-2.9831	3.6785	13.382	7.9223	10.926	0	0	0.14548	0.88128
-2.9827	3.7052	13.516	7.9408	10.965	0	0	0.15148	0.91581
-2.9823	3.7365	13.645	7.9588	11.002	0	0	0.15766	0.95133
-2.9819	3.7676	13.77	7.9661	11.026	0	0	0.16404	0.98785
-2.9815	3.7936	13.9	7.9841	11.063	0	0	0.17062	1.0254
-2.9811	3.8191	14.029	8.0015	11.099	0	0	0.17739	1.0639
-2.9807	3.8441	14.156	8.0184	11.135	0	0	0.19253	1.0993
-2.9803	3.8686	14.282	8.0349	11.169	0	0	0.20021	1.1397
-2.9799	3.8927	14.406	8.0507	11.203	0	0	0.20812	1.1811
-2.9795	3.9162	14.529	8.0659	11.235	0	0	0.21626	1.2235
-2.9791	3.9393	14.65	8.0916	11.294	0	0	0.22464	1.267
-2.9787	3.9618	14.769	8.1063	11.325	0	0	0.23326	1.3116
-2.9783	3.9838	14.886	8.1203	11.356	0	0	0.24213	1.3572
-2.9779	4.0052	15.002	8.1336	11.386	0	0	0.25125	1.4038
-2.9775	4.0261	15.115	8.1462	11.414	0	0	0.26061	1.4515
-2.9771	4.0464	15.227	8.1581	11.441	0	0	0.27023	1.5003
-2.9767	4.0661	15.336	8.1693	11.467	0	0	0.28011	1.5501
-2.9763	4.0853	15.444	8.1797	11.492	0	0	0.29025	1.601
-2.9759	4.1039	15.549	8.1894	11.515	0	0	0.30065	1.6529
-2.9755	4.1218	15.652	8.1982	11.537	0	0	0.31131	1.7058
-2.9751	4.1392	15.753	8.2063	11.558	0	0	0.32224	1.7598
-2.9747	4.1559	15.852	8.2242	11.577	0	0	0.33343	1.8148
-2.9743	4.172	15.948	8.2312	11.595	0	0	0.3449	1.8709
-2.9739	4.1875	16.042	8.2375	11.612	0	0	0.35663	1.9279
-2.9735	4.2023	16.134	8.2428	11.627	0	0	0.36863	1.986
-2.9731	4.2165	16.224	8.2474	11.64	0	0	0.38091	2.0451
-2.9727	4.2301	16.31	8.251	11.653	0	0	0.39346	2.1051
-2.9723	4.243	16.395	8.2539	11.663	0	0	0.40628	2.1661
-2.9719	4.2552	16.477	8.2558	11.673	0	0	0.41937	2.228
-2.9715	4.2668	16.557	8.2675	11.693	0	0	0.43274	2.2909
-2.9711	4.2776	16.634	8.2684	11.701	0	0	0.44638	2.3547
-2.9707	4.2879	16.708	8.2685	11.707	0	0	0.46029	2.4194
-2.9703	4.3024	16.802	8.2677	11.712	0	0	0.47447	2.485
-2.9699	4.3116	16.873	8.2661	11.716	0	0	0.48892	2.5514
-2.9695	4.3201	16.942	8.2538	11.707	0	0	0.50364	2.6186
-2.9691	4.328	17.009	8.241	11.717	0	0	0.51862	2.6866
-2.9687	4.3402	17.071	8.2381	11.717	0	0	0.53387	2.7554
-2.9683	4.347	17.133	8.2344	11.716	0	0	0.54938	2.825
-2.9679	4.3532	17.192	8.2298	11.714	0	0	0.56514	2.8953
-2.9675	4.3639	17.245	8.2244	11.71	0	0	0.58116	2.9663
-2.9671	4.369	17.299	8.2181	11.706	0	0	0.59744	3.0379
-2.9667	4.3736	17.351	8.2008	11.688	0	0	0.61396	3.1102
-2.9663	4.3775	17.401	8.1936	11.682	0	0	0.63072	3.183
-2.9659	4.376	17.452	8.1856	11.675	0	0	0.64772	3.2565
-2.9655	4.379	17.497	8.1768	11.668	0	0	0.66496	3.3304
-2.9651	4.3813	17.539	8.1673	11.659	0	0	0.68243	3.4048
-2.9647	4.3881	17.576	8.157	11.649	0	0	0.70012	3.4797
-2.9643	4.3895	17.614	8.146	11.639	0	0	0.71803	3.5551
-2.9639	4.3904	17.65	8.1343	11.627	0	0	0.73615	3.6308
-2.9635	4.3906	17.683	8.122	11.615	0	0	0.75447	3.7068
-2.9631	4.3903	17.715	8.1091	11.602	0	0	0.77299	3.7831
-2.9627	4.3893	17.744	8.0955	11.589	0	0	0.79171	3.8597
-2.9623	4.3879	17.772	8.0709	11.566	0	0	0.8106	3.9365
-2.9619	4.3859	17.797	8.0568	11.552	0	0	0.82968	4.0135
-2.9615	4.3833	17.821	8.0422	11.537	0	0	0.84892	4.0906
-2.9611	4.3802	17.842	8.027	11.522	0	0	0.86832	4.1678
-2.9607	4.3766	17.862	8.0009	11.495	0	0	0.88787	4.2451
-2.9603	4.3725	17.879	7.9959	11.5	0	0	0.90755	4.3224
-2.9599	4.368	17.895	7.9805	11.485	0	0	0.92738	4.3996
-2.9595	4.3629	17.909	7.9647	11.47	0	0	0.94732	4.4767
-2.9591	4.3573	17.921	7.9486	11.455	0	0	0.96737	4.5537
-2.9587	4.3514	17.931	7.9321	11.44	0	0	0.98752	4.6306
-2.9583	4.3449	17.939	7.9153	11.424	0	0	1.0078	4.7072
-2.9579	4.338	17.946	7.9088	11.42	0	0	1.0281	4.7836
-2.9575	4.3308	17.951	7.8921	11.406	0	0	1.0485	4.8597
-2.9571	4.3281	17.964	7.8752	11.391	0	0	1.0689	4.9354
-2.9567	4.3204	17.966	7.8582	11.377	0	0	1.0894	5.0107
-2.9563	4.3123	17.967	7.8411	11.363	0	0	1.1099	5.0856
-2.9559	4.3038	17.965	7.8238	11.349	0	0	1.1305	5.16
-2.9555	4.295	17.963	7.8066	11.335	0	0	1.151	5.2339
-2.9551	4.286	17.958	7.7893	11.322	0	0	1.1716	5.3072
-2.9547	4.2766	17.952	7.772	11.31	0	0	1.1921	5.38
-2.9543	4.2669	17.944	7.7548	11.298	0	0	1.2126	5.4521
-2.9539	4.257	17.935	7.7376	11.287	0	0	1.2331	5.5235
-2.9535	4.2469	17.925	7.7205	11.276	0	0	1.2534	5.5942
-2.9531	4.2365	17.913	7.7143	11.258	0	0	1.2738	5.6641
-2.9527	4.2259	17.899	7.6981	11.249	0	0	1.294	5.7332
-2.9523	4.2152	17.884	7.6822	11.24	0	0	1.3141	5.8015
-2.9519	4.2042	17.867	7.6665	11.232	0	0	1.3342	5.8689
-2.9515	4.1931	17.849	7.651	11.224	0	0	1.3541	5.9355
-2.9511	4.1921	17.827	7.6255	11.21	0	0	1.3738	6.001
-2.9507	4.1814	17.807	7.6112	11.205	0	0	1.3934	6.0656
-2.9503	4.1705	17.785	7.5973	11.202	0	0	1.4128	6.1292
-2.9499	4.1597	17.761	7.5837	11.199	0	0	1.4321	6.1918
-2.9495	4.1488	17.736	7.5704	11.198	0	0	1.4511	6.2533
-2.9491	4.1378	17.71	7.5575	11.197	0	0	1.47	6.3137
-2.9487	4.1269	17.683	7.545	11.198	0	0	1.4886	6.3729
-2.9483	4.116	17.655	7.5328	11.199	0	0	1.5069	6.431
-2.9479	4.1051	17.625	7.5211	11.202	0	0	1.5251	6.4879
-2.9475	4.0943	17.594	7.5099	11.206	0	0	1.5429	6.5437
-2.9471	4.0835	17.562	7.499	11.212	0	0	1.5605	6.5982
-2.9467	4.0728	17.529	7.4887	11.218	0	0	1.5777	6.6514
-2.9463	4.0623	17.495	7.4788	11.226	0	0	1.5947	6.7034
-2.9459	4.0518	17.46	7.4693	11.235	0	0	1.6113	6.754
-2.9455	4.0415	17.424	7.4604	11.245	0	0	1.6276	6.8034
-2.9451	4.0313	17.387	7.452	11.256	0	0	1.6436	6.8514
-2.9447	4.0213	17.349	7.444	11.269	0	0	1.6591	6.8981
-2.9443	4.0115	17.311	7.4366	11.283	0	0	1.6743	6.9434
-2.9439	4.0018	17.271	7.4297	11.298	0	0	1.6892	6.9873
-2.9435	3.9924	17.231	7.4232	11.314	0	0	1.7036	7.0298
-2.9431	3.9832	17.19	7.4173	11.332	0	0	1.7176	7.0709
-2.9427	3.9742	17.148	7.412	11.35	0	0	1.7312	7.1106
-2.9423	3.9655	17.106	7.4071	11.37	0	0	1.7443	7.1488
-2.9419	3.9571	17.063	7.4027	11.39	0	0	1.757	7.1856
-2.9415	3.9489	17.02	7.3988	11.412	0	0	1.7692	7.2209
-2.9411	3.9461	16.982	7.3955	11.435	0	0	1.781	7.2547
-2.9407	3.9388	16.939	7.3825	11.457	0	0	1.7923	7.2871
-2.9403	3.9318	16.895	7.3806	11.481	0	0	1.8031	7.3179
-2.9399	3.9251	16.851	7.3793	11.506	0	0	1.8134	7.3473
-2.9395	3.9138	16.808	7.3783	11.532	0	0	1.8232	7.3751
-2.9391	3.9082	16.764	7.3778	11.558	0	0	1.8325	7.4014
-2.9387	3.9028	16.72	7.3777	11.585	0	0	1.8412	7.4262
-2.9383	3.8978	16.676	7.3779	11.613	0	0	1.8495	7.4495
-2.9379	3.8932	16.632	7.3786	11.641	0	0	1.8572	7.4712
-2.9375	3.8889	16.589	7.3796	11.669	0	0	1.8643	7.4914
-2.9371	3.885	16.546	7.381	11.698	0	0	1.8709	7.51
-2.9367	3.8815	16.503	7.3936	11.736	0	0	1.8769	7.5271
-2.9363	3.8836	16.455	7.3963	11.765	0	0	1.8824	7.5426
-2.9359	3.8811	16.413	7.3993	11.795	0	0	1.8873	7.5565
-2.9355	3.8791	16.372	7.4027	11.824	0	0	1.8917	7.5689
-2.9351	3.8774	16.331	7.4172	11.876	0	0	1.8954	7.5797
-2.9347	3.8762	16.291	7.4218	11.907	0	0	1.8986	7.5889
-2.9343	3.8753	16.251	7.4266	11.937	0	0	1.9012	7.5965
-2.9339	3.8802	16.214	7.4318	11.968	0	0	1.9032	7.6026
-2.9335	3.8805	16.177	7.4372	11.998	0	0	1.9046	7.607
-2.9331	3.8812	16.14	7.4428	12.027	0	0	1.9055	7.6099
-2.9327	3.8823	16.105	7.4486	12.057	0	0	1.9057	7.6112
-2.9323	3.8839	16.07	7.4657	12.118	0	0	1.9134	7.6024
-2.9319	3.8859	16.037	7.4726	12.147	0	0	1.913	7.6
-2.9315	3.8883	16.005	7.4797	12.176	0	0	1.912	7.5959
-2.9311	3.8911	15.975	7.4769	12.176	0	0	1.9104	7.5902
-2.9307	3.8943	15.945	7.4849	12.205	0	0	1.9083	7.5829
-2.9303	3.8979	15.917	7.4929	12.233	0	0	1.9057	7.574
-2.9299	3.9019	15.89	7.5117	12.254	0	0	1.9024	7.5634
-2.9295	3.9064	15.865	7.5205	12.28	0	0	1.8987	7.5512
-2.9291	3.9112	15.841	7.5294	12.304	0	0	1.8944	7.5373
-2.9287	3.9163	15.818	7.5383	12.328	0	0	1.8896	7.5218
-2.9283	3.917	15.799	7.5473	12.35	0	0	1.8842	7.5047
-2.9279	3.9232	15.779	7.5562	12.371	0	0	1.8783	7.4859
-2.9275	3.9248	15.757	7.5762	12.422	0	0	1.872	7.4655
-2.9271	3.9319	15.74	7.5858	12.442	0	0	1.8651	7.4435
-2.9267	3.9393	15.724	7.5954	12.46	0	0	1.8577	7.4198
-2.9263	3.9471	15.71	7.6049	12.478	0	0	1.8498	7.3945
-2.9259	3.9551	15.698	7.6144	12.494	0	0	1.8415	7.3676
-2.9255	3.9633	15.686	7.6239	12.508	0	0	1.8327	7.339
-2.9251	3.9718	15.676	7.6333	12.521	0	0	1.8313	7.3291
-2.9247	3.9806	15.668	7.6425	12.533	0	0	1.8221	7.2981
-2.9243	3.9896	15.66	7.6517	12.544	0	0	1.8125	7.2655
-2.9239	3.9988	15.654	7.6608	12.552	0	0	1.8024	7.2314
-2.9235	4.0082	15.65	7.6697	12.56	0	0	1.792	7.1957
-2.9231	4.0179	15.646	7.6785	12.566	0	0	1.7812	7.1585
-2.9227	4.0276	15.644	7.6872	12.571	0	0	1.7701	7.1197
-2.9223	4.0376	15.642	7.6956	12.574	0	0	1.7586	7.0794
-2.9219	4.0477	15.642	7.7039	12.576	0	0	1.7468	7.0376
-2.9215	4.0579	15.643	7.7226	12.57	0	0	1.7347	6.9943
-2.9211	4.0682	15.645	7.7417	12.596	0	0	1.7223	6.9495
-2.9207	4.0787	15.647	7.7507	12.595	0	0	1.7096	6.9033
-2.9203	4.0892	15.651	7.7596	12.593	0	0	1.6966	6.8556
-2.9199	4.0997	15.655	7.769	12.588	0	0	1.6834	6.8065
-2.9195	4.1103	15.661	7.7788	12.585	0	0	1.67	6.7561
-2.9191	4.121	15.667	7.7884	12.581	0	0	1.6564	6.7042
-2.9187	4.1316	15.673	7.7979	12.575	0	0	1.6426	6.6511
-2.9183	4.1423	15.68	7.8073	12.569	0	0	1.6285	6.5966
-2.9179	4.1479	15.691	7.8165	12.562	0	0	1.6144	6.5408
-2.9175	4.1588	15.699	7.8255	12.554	0	0	1.6001	6.4838
-2.9171	4.1696	15.707	7.8565	12.549	0	0	1.5857	6.4256
-2.9167	4.1803	15.716	7.8666	12.541	0	0	1.5711	6.3663
-2.9163	4.1862	15.729	7.8767	12.531	0	0	1.5565	6.3058
-2.9159	4.1969	15.738	7.8873	12.52	0	0	1.5418	6.2443
-2.9155	4.2075	15.747	7.8882	12.52	0	0	1.5271	6.1817
-2.9151	4.2179	15.756	7.9	12.512	0	0	1.5123	6.1181
-2.9147	4.2281	15.765	7.9117	12.504	0	0	1.4975	6.0536
-2.9143	4.2382	15.774	7.9342	12.507	0	0	1.4827	5.9883
-2.9139	4.2479	15.782	7.9465	12.499	0	0	1.468	5.9221
-2.9135	4.2575	15.791	7.9588	12.492	0	0	1.4616	5.8675
-2.9131	4.2668	15.799	7.9613	12.491	0	0	1.4474	5.8005
-2.9127	4.2758	15.808	7.9744	12.484	0	0	1.4334	5.7329
-2.9123	4.2845	15.815	7.9875	12.477	0	0	1.4195	5.6648
-2.9119	4.2929	15.823	8.0007	12.471	0	0	1.4057	5.5962
-2.9115	4.301	15.83	8.0248	12.459	0	0	1.3921	5.5273
-2.9111	4.3087	15.836	8.0389	12.453	0	0	1.3787	5.4582
-2.9107	4.3161	15.842	8.0532	12.449	0	0	1.3654	5.3889
-2.9103	4.3184	15.852	8.0678	12.445	0	0	1.3524	5.3195
-2.9099	4.3253	15.856	8.0825	12.442	0	0	1.3397	5.2502
-2.9095	4.3319	15.86	8.0976	12.44	0	0	1.3272	5.181
-2.9091	4.3379	15.863	8.1129	12.439	0	0	1.3149	5.112
-2.9087	4.3436	15.865	8.1286	12.439	0	0	1.3029	5.0435
-2.9083	4.3488	15.867	8.1446	12.441	0	0	1.2913	4.9754
-2.9079	4.3535	15.867	8.1611	12.444	0	0	1.28	4.908
-2.9075	4.3578	15.867	8.1779	12.448	0	0	1.269	4.8413
-2.9071	4.3615	15.865	8.1952	12.454	0	0	1.2583	4.7756
-2.9067	4.3648	15.863	8.2129	12.462	0	0	1.248	4.7109
-2.9063	4.3676	15.86	8.2311	12.471	0	0	1.2381	4.6475
-2.9059	4.3698	15.855	8.2499	12.482	0	0	1.2287	4.5854
-2.9055	4.3715	15.85	8.2692	12.495	0	0	1.2196	4.525
-2.9051	4.3727	15.843	8.2788	12.488	0	0	1.2109	4.4662
-2.9047	4.3734	15.858	8.3008	12.505	0	0	1.2027	4.4094
-2.9043	4.3741	15.849	8.3238	12.524	0	0	1.1949	4.3547
-2.9039	4.3742	15.84	8.3474	12.545	0	0	1.1876	4.3023
-2.9035	4.3737	15.829	8.3717	12.568	0	0	1.1807	4.2524
-2.9031	4.3726	15.817	8.3966	12.593	0	0	1.1744	4.2052
-2.9027	4.3709	15.803	8.4223	12.62	0	0	1.1685	4.1609
-2.9023	4.3687	15.789	8.4488	12.65	0	0	1.1632	4.1197
-2.9019	4.3658	15.772	8.476	12.682	0	0	1.1583	4.0818
-2.9015	4.3624	15.755	8.5041	12.716	0	0	1.154	4.0474
-2.9011	4.3535	15.725	8.5329	12.753	0	0	1.1501	4.0168
-2.9007	4.3443	15.711	8.5627	12.792	0	0	1.1469	3.99
-2.9003	4.3396	15.69	8.5933	12.834	0	0	1.1441	3.9673
-2.8999	4.3342	15.668	8.6248	12.878	0	0	1.1419	3.9489
-2.8995	4.3282	15.643	8.6573	12.925	0	0	1.1402	3.9348
-2.8991	4.3215	15.617	8.6907	12.975	0	0	1.1391	3.9253
-2.8987	4.3193	15.604	8.736	13.052	0	0	1.1386	3.9204
-2.8983	4.3116	15.575	8.7721	13.109	0	0	1.1386	3.9203
-2.8979	4.3033	15.545	8.8092	13.169	0	0	1.1391	3.9251
-2.8975	4.2944	15.514	8.8584	13.231	0	0	1.1403	3.9347
-2.8971	4.2849	15.48	8.8983	13.297	0	0	1.1419	3.9494
-2.8967	4.2747	15.445	8.9394	13.365	0	0	1.1442	3.9689
-2.8963	4.2639	15.409	8.9816	13.438	0	0	1.147	3.9935
-2.8959	4.2475	15.363	9.0249	13.513	0	0	1.1503	4.023
-2.8955	4.2358	15.323	9.0694	13.591	0	0	1.1542	4.0573
-2.8951	4.2235	15.282	9.1048	13.647	0	0	1.1587	4.0965
-2.8947	4.2105	15.238	9.1523	13.733	0	0	1.1636	4.1404
-2.8943	4.1969	15.193	9.2009	13.822	0	0	1.1692	4.1889
-2.8939	4.1827	15.147	9.2507	13.915	0	0	1.1752	4.242
-2.8935	4.1679	15.098	9.3016	14.01	0	0	1.1818	4.2994
-2.8931	4.1525	15.048	9.3537	14.109	0	0	1.1889	4.361
-2.8927	4.1366	14.996	9.407	14.211	0	0	1.1965	4.4268
-2.8923	4.12	14.941	9.4614	14.316	0	0	1.2046	4.4964
-2.8919	4.1029	14.886	9.5169	14.425	0	0	1.2132	4.5698
-2.8915	4.0852	14.828	9.5736	14.537	0	0	1.2223	4.6468
-2.8911	4.067	14.768	9.6315	14.652	0	0	1.2318	4.7271
-2.8907	4.0482	14.707	9.6905	14.77	0	0	1.2418	4.8108
-2.8903	4.0289	14.643	9.7505	14.891	0	0	1.2523	4.8974
-2.8899	4.009	14.578	9.8117	15.016	0	0	1.2632	4.987
-2.8895	3.9838	14.507	9.8739	15.143	0	0	1.2745	5.0793
-2.8891	3.9632	14.438	9.9372	15.274	0	0	1.2862	5.1741
-2.8887	3.9421	14.368	10.002	15.408	0	0	1.2983	5.2714
-2.8883	3.9256	14.31	10.057	15.537	0	0	1.3108	5.3708
-2.8879	3.9039	14.237	10.123	15.677	0	0	1.3236	5.4723
-2.8875	3.8817	14.162	10.191	15.82	0	0	1.3449	5.5677
-2.8871	3.859	14.085	10.26	15.966	0	0	1.3589	5.6725
-2.8867	3.836	14.007	10.33	16.115	0	0	1.3732	5.7788
-2.8863	3.8125	13.926	10.4	16.266	0	0	1.3879	5.8866
-2.8859	3.7886	13.844	10.471	16.42	0	0	1.4028	5.9957
-2.8855	3.7643	13.761	10.543	16.576	0	0	1.418	6.1059
-2.8851	3.7397	13.675	10.615	16.735	0	0	1.4336	6.2171
-2.8847	3.7147	13.588	10.689	16.896	0	0	1.4417	6.2887
-2.8843	3.6894	13.5	10.762	17.059	0	0	1.4582	6.4037
-2.8839	3.6689	13.404	10.837	17.224	0	0	1.4748	6.5192
-2.8835	3.6432	13.312	10.912	17.391	0	0	1.4916	6.6351
-2.8831	3.6173	13.219	10.987	17.56	0	0	1.5085	6.7513
-2.8827	3.5862	13.123	11.062	17.73	0	0	1.5256	6.8677
-2.8823	3.5601	13.027	11.138	17.902	0	0	1.5427	6.9841
-2.8819	3.5337	12.929	11.215	18.076	0	0	1.56	7.1005
-2.8815	3.5071	12.83	11.291	18.25	0	0	1.5774	7.2167
-2.8811	3.4803	12.73	11.368	18.426	0	0	1.5948	7.3326
-2.8807	3.4533	12.629	11.444	18.602	0	0	1.6122	7.4481
-2.8803	3.4261	12.527	11.521	18.78	0	0	1.6297	7.5632
-2.8799	3.3988	12.423	11.598	18.958	0	0	1.6471	7.6776
-2.8795	3.3713	12.319	11.674	19.136	0	0	1.6645	7.7914
-2.8791	3.3438	12.214	11.751	19.315	0	0	1.6819	7.9043
-2.8787	3.3161	12.107	11.827	19.493	0	0	1.6993	8.0163
-2.8783	3.2884	12.001	11.902	19.672	0	0	1.7165	8.1274
-2.8779	3.2606	11.893	11.978	19.85	0	0	1.7337	8.2373
-2.8775	3.2328	11.785	12.052	20.028	0	0	1.7507	8.346
-2.8771	3.2049	11.677	12.127	20.206	0	0	1.7676	8.4535
-2.8767	3.1771	11.568	12.2	20.382	0	0	1.7844	8.5595
-2.8763	3.1443	11.46	12.273	20.558	0	0	1.8009	8.6641
-2.8759	3.1168	11.351	12.335	20.704	0	0	1.8173	8.7672
-2.8755	3.0893	11.241	12.407	20.879	0	0	1.8335	8.8685
-2.8751	3.0619	11.132	12.488	21.055	0	0	1.8494	8.9681
-2.8747	3.0345	11.023	12.558	21.227	0	0	1.8651	9.0659
-2.8743	3.0073	10.914	12.628	21.396	0	0	1.8805	9.1618
-2.8739	2.9802	10.805	12.696	21.564	0	0	1.8957	9.2557
-2.8735	2.9531	10.698	12.763	21.729	0	0	1.9106	9.3475
-2.8731	2.9263	10.59	12.828	21.891	0	0	1.9251	9.4372
-2.8727	2.8996	10.484	12.892	22.051	0	0	1.9394	9.5246
-2.8723	2.873	10.379	12.955	22.209	0	0	1.9455	9.6162
-2.8719	2.8467	10.274	13.016	22.363	0	0	1.9595	9.6985
-2.8715	2.8206	10.171	13.075	22.514	0	0	1.9731	9.7784
-2.8711	2.7947	10.069	13.133	22.661	0	0	1.9863	9.8558
-2.8707	2.7691	9.9692	13.188	22.805	0	0	1.9991	9.9305
-2.8703	2.7437	9.8706	13.242	22.946	0	0	2.0114	10.003
-2.8699	2.7186	9.774	13.284	23.089	0	0	2.0234	10.072
-2.8695	2.6938	9.6793	13.335	23.221	0	0	2.0348	10.139
-2.8691	2.6693	9.5867	13.383	23.349	0	0	2.0458	10.203
-2.8687	2.6501	9.4988	13.429	23.473	0	0	2.0564	10.263
-2.8683	2.6266	9.4109	13.474	23.593	0	0	2.0665	10.321
-2.8679	2.6034	9.3256	13.515	23.708	0	0	2.0761	10.376
-2.8675	2.5806	9.243	13.555	23.819	0	0	2.0852	10.428
-2.8671	2.5582	9.1633	13.592	23.924	0	0	2.0938	10.477
-2.8667	2.5361	9.0866	13.627	24.025	0	0	2.1019	10.523
-2.8663	2.5145	9.0129	13.659	24.121	0	0	2.1095	10.565
-2.8659	2.4933	8.9426	13.678	24.209	0	0	2.1166	10.605
-2.8655	2.4725	8.8756	13.705	24.295	0	0	2.1232	10.641
-2.8651	2.4522	8.812	13.73	24.375	0	0	2.1293	10.674
-2.8647	2.4323	8.7521	13.752	24.45	0	0	2.1348	10.703
-2.8643	2.4129	8.6958	13.771	24.52	0	0	2.1398	10.729
-2.8639	2.3939	8.6433	13.788	24.583	0	0	2.1443	10.752
-2.8635	2.3754	8.5946	13.801	24.641	0	0	2.1483	10.772
-2.8631	2.3574	8.5498	13.812	24.694	0	0	2.1518	10.788
-2.8627	2.3399	8.5089	13.82	24.74	0	0	2.1547	10.801
-2.8623	2.3229	8.472	13.824	24.781	0	0	2.1571	10.81
-2.8619	2.3016	8.4142	13.826	24.815	0	0	2.159	10.816
-2.8615	2.2811	8.3668	13.825	24.844	0	0	2.1604	10.819
-2.8611	2.2661	8.3444	13.821	24.866	0	0	2.1612	10.819
-2.8607	2.2516	8.326	13.813	24.883	0	0	2.1538	10.821
-2.8603	2.2376	8.3113	13.803	24.893	0	0	2.1541	10.813
-2.8599	2.224	8.3005	13.8	24.922	0	0	2.1539	10.803
-2.8595	2.2162	8.2877	13.785	24.922	0	0	2.1531	10.788
-2.8591	2.2039	8.2839	13.756	24.889	0	0	2.1518	10.771
-2.8587	2.1922	8.2837	13.734	24.878	0	0	2.15	10.751
-2.8583	2.1809	8.2869	13.71	24.861	0	0	2.1477	10.727
-2.8579	2.1702	8.2935	13.682	24.837	0	0	2.1449	10.7
-2.8575	2.1599	8.3034	13.652	24.808	0	0	2.1416	10.67
-2.8571	2.1502	8.3163	13.618	24.772	0	0	2.1378	10.637
-2.8567	2.141	8.3322	13.582	24.73	0	0	2.1336	10.602
-2.8563	2.1322	8.3509	13.553	24.706	0	0	2.1289	10.563
-2.8559	2.124	8.3723	13.511	24.653	0	0	2.1237	10.522
-2.8555	2.1162	8.3962	13.466	24.595	0	0	2.1181	10.477
-2.8551	2.109	8.4224	13.419	24.53	0	0	2.1121	10.43
-2.8547	2.1022	8.4507	13.358	24.466	0	0	2.1056	10.381
-2.8543	2.0959	8.4811	13.305	24.39	0	0	2.0988	10.329
-2.8539	2.09	8.5132	13.249	24.308	0	0	2.0915	10.274
-2.8535	2.0846	8.547	13.191	24.22	0	0	2.0838	10.218
-2.8531	2.0797	8.5822	13.13	24.127	0	0	2.0758	10.159
-2.8527	2.0752	8.6187	13.077	24.054	0	0	2.0674	10.097
-2.8523	2.0711	8.6562	13.011	23.952	0	0	2.0586	10.034
-2.8519	2.0675	8.6947	12.943	23.844	0	0	2.0495	9.9686
-2.8515	2.0643	8.7338	12.872	23.732	0	0	2.04	9.9015
-2.8511	2.0665	8.773	12.789	23.616	0	0	2.0302	9.8325
-2.8507	2.0644	8.8131	12.714	23.493	0	0	2.0201	9.762
-2.8503	2.0627	8.8534	12.637	23.366	0	0	2.0097	9.6898
-2.8499	2.0617	8.8936	12.557	23.234	0	0	1.999	9.6163
-2.8495	2.0613	8.9333	12.475	23.098	0	0	1.988	9.5414
-2.8491	2.0614	8.9728	12.403	22.988	0	0	1.9768	9.4653
-2.8487	2.0617	9.012	12.317	22.845	0	0	1.9652	9.3881
-2.8483	2.0577	9.0321	12.23	22.698	0	0	1.9535	9.3099
-2.8479	2.0591	9.0711	12.141	22.548	0	0	1.9415	9.2309
-2.8475	2.0558	9.0709	12.05	22.393	0	0	1.9292	9.1512
-2.8471	2.0581	9.1103	11.957	22.236	0	0	1.9168	9.0708
-2.8467	2.0606	9.1485	11.863	22.074	0	0	1.9041	8.9899
-2.8463	2.0634	9.1854	11.778	21.935	0	0	1.8912	8.9087
-2.8459	2.0665	9.2209	11.681	21.77	0	0	1.8782	8.8271
-2.8455	2.0698	9.2548	11.583	21.601	0	0	1.865	8.7455
-2.8451	2.0733	9.2872	11.484	21.43	0	0	1.8516	8.6638
-2.8447	2.0721	9.3167	11.383	21.256	0	0	1.838	8.5821
-2.8443	2.0763	9.346	11.282	21.08	0	0	1.8243	8.5007
-2.8439	2.0807	9.3734	11.179	20.902	0	0	1.8105	8.4195
-2.8435	2.0853	9.3989	11.076	20.723	0	0	1.7965	8.3388
-2.8431	2.0901	9.4225	10.972	20.541	0	0	1.7824	8.2585
-2.8427	2.095	9.4441	10.867	20.358	0	0	1.7682	8.1789
-2.8423	2.1001	9.4637	10.761	20.174	0	0	1.7538	8.0999
-2.8419	2.1053	9.4812	10.655	19.989	0	0	1.7394	8.0217
-2.8415	2.1106	9.4966	10.548	19.802	0	0	1.7249	7.9444
-2.8411	2.1161	9.5099	10.441	19.615	0	0	1.7103	7.868
-2.8407	2.1216	9.5211	10.334	19.428	0	0	1.6956	7.7926
-2.8403	2.1272	9.5302	10.226	19.24	0	0	1.6808	7.7183
-2.8399	2.1329	9.5372	10.109	19.049	0	0	1.666	7.6451
-2.8395	2.144	9.5459	10.002	18.862	0	0	1.6511	7.5731
-2.8391	2.1501	9.5491	9.8946	18.674	0	0	1.6361	7.5023
-2.8387	2.1563	9.5503	9.7877	18.488	0	0	1.6211	7.4329
-2.8383	2.1626	9.5495	9.6809	18.301	0	0	1.6061	7.3647
-2.8379	2.1689	9.5467	9.5745	18.116	0	0	1.591	7.2979
-2.8375	2.1806	9.5384	9.4585	17.906	0	0	1.5759	7.2324
-2.8371	2.1873	9.5317	9.3535	17.725	0	0	1.5607	7.1683
-2.8367	2.1893	9.5177	9.2489	17.545	0	0	1.5455	7.1056
-2.8363	2.1964	9.5073	9.145	17.367	0	0	1.5303	7.0443
-2.8359	2.2086	9.4909	9.0417	17.191	0	0	1.5151	6.9843
-2.8355	2.216	9.4768	8.9392	17.017	0	0	1.4998	6.9257
-2.8351	2.2234	9.4611	8.8375	16.845	0	0	1.4846	6.8685
-2.8347	2.2309	9.4439	8.7366	16.676	0	0	1.4693	6.8125
-2.8343	2.2384	9.4252	8.6368	16.51	0	0	1.454	6.7578
-2.8339	2.2459	9.4051	8.5379	16.346	0	0	1.4387	6.7043
-2.8335	2.2534	9.3838	8.4402	16.186	0	0	1.4234	6.6521
-2.8331	2.2609	9.3613	8.3437	16.065	0	0	1.4081	6.6009
-2.8327	2.2684	9.3376	8.2497	15.913	0	0	1.3928	6.5509
-2.8323	2.2758	9.3131	8.1569	15.765	0	0	1.3775	6.5018
-2.8319	2.2833	9.2876	8.0654	15.622	0	0	1.3622	6.4537
-2.8315	2.2908	9.2614	7.9754	15.482	0	0	1.3469	6.4065
-2.8311	2.2934	9.2385	7.8868	15.347	0	0	1.3317	6.3601
-2.8307	2.2964	9.2153	7.7997	15.217	0	0	1.3164	6.3145
-2.8303	2.3044	9.1871	7.7143	15.091	0	0	1.3011	6.2695
-2.8299	2.3124	9.1587	7.6304	14.971	0	0	1.2859	6.2252
-2.8295	2.3204	9.1301	7.5482	14.855	0	0	1.2706	6.1813
-2.8291	2.3283	9.1016	7.4678	14.745	0	0	1.2554	6.1379
-2.8287	2.3361	9.0732	7.389	14.64	0	0	1.2402	6.0949
-2.8283	2.344	9.045	7.3121	14.541	0	0	1.225	6.0521
-2.8279	2.3518	9.0173	7.237	14.448	0	0	1.2098	6.0096
-2.8275	2.3596	8.9902	7.1745	14.395	0	0	1.1947	5.9671
-2.8271	2.3674	8.9638	7.1038	14.315	0	0	1.1795	5.9248
-2.8267	2.3751	8.9382	7.0351	14.242	0	0	1.1644	5.8824
-2.8263	2.3828	8.9136	6.9684	14.175	0	0	1.1493	5.84
-2.8259	2.3906	8.8902	6.9036	14.115	0	0	1.1342	5.7974
-2.8255	2.4035	8.8634	6.8409	14.061	0	0	1.1192	5.7545
-2.8251	2.4115	8.8424	6.7803	14.013	0	0	1.1041	5.7114
-2.8247	2.4195	8.823	6.7217	13.972	0	0	1.0891	5.668
-2.8243	2.4275	8.8053	6.6651	13.938	0.019366	0.094872	1.0741	5.6242
-2.8239	2.4356	8.7895	6.6107	13.91	0.020553	0.10069	1.0592	5.5799
-2.8235	2.4436	8.7756	6.5583	13.889	0.021804	0.10682	1.0442	5.5351
-2.8231	2.4517	8.7638	6.5081	13.875	0.023122	0.11328	1.0293	5.4898
-2.8227	2.4599	8.7542	6.4599	13.867	0.024511	0.12008	1.0145	5.4439
-2.8223	2.4681	8.7469	6.4139	13.865	0.025972	0.12723	0.99965	5.3974
-2.8219	2.4763	8.7422	6.3699	13.871	0.027509	0.13476	0.98486	5.3502
-2.8215	2.4845	8.7399	6.328	13.883	0.029125	0.14268	0.9701	5.3024
-2.8211	2.4878	8.7462	6.2882	13.901	0.030824	0.15101	0.95538	5.2539
-2.8207	2.4965	8.7491	6.2505	13.926	0.032609	0.15975	0.9407	5.2046
-2.8203	2.5052	8.7548	6.2259	13.952	0.034484	0.16894	0.92606	5.1546
-2.8199	2.5139	8.7634	6.193	13.989	0.036452	0.17858	0.91146	5.1038
-2.8195	2.5227	8.7751	6.1621	14.032	0.038517	0.18869	0.89691	5.0522
-2.8191	2.5315	8.7898	6.1333	14.081	0.040683	0.1993	0.88241	4.9999
-2.8187	2.5404	8.8076	6.1065	14.136	0.042953	0.21042	0.86796	4.9468
-2.8183	2.5494	8.8285	6.0817	14.197	0.045331	0.22208	0.85357	4.8929
-2.8179	2.5584	8.8526	6.0589	14.264	0.047823	0.23428	0.83923	4.8383
-2.8175	2.5675	8.8799	6.038	14.336	0.050431	0.24706	0.82494	4.7829
-2.8171	2.5766	8.9104	6.019	14.414	0.05316	0.26043	0.81072	4.7267
-2.8167	2.5859	8.9441	5.9917	14.456	0.056014	0.27441	0.79656	4.6698
-2.8163	2.5903	8.9867	5.9771	14.547	0.058998	0.28903	0.78247	4.6121
-2.8159	2.6	9.0263	5.9643	14.642	0.062116	0.3043	0.76844	4.5538
-2.8155	2.6097	9.0692	5.9638	14.784	0.065373	0.32026	0.75449	4.4947
-2.8151	2.6196	9.1151	5.9449	14.895	0.068772	0.33691	0.74061	4.435
-2.8147	2.6294	9.1641	5.9385	15.006	0.07232	0.35429	0.72681	4.3747
-2.8143	2.6394	9.2161	5.9338	15.122	0.07602	0.37242	0.71309	4.3138
-2.8139	2.6446	9.2599	5.9307	15.242	0.079878	0.39132	0.69945	4.2523
-2.8135	2.6549	9.3187	5.9291	15.365	0.083898	0.41101	0.68589	4.1902
-2.8131	2.6654	9.3802	5.9291	15.493	0.088085	0.43153	0.67243	4.1277
-2.8127	2.6758	9.4443	5.9306	15.624	0.092444	0.45288	0.65906	4.0646
-2.8123	2.6864	9.5109	5.9234	15.761	0.09698	0.4751	0.63797	4.0061
-2.8119	2.697	9.58	5.9283	15.899	0.1017	0.49821	0.62525	3.942
-2.8115	2.7076	9.6515	5.9345	16.04	0.1066	0.52224	0.61261	3.8775
-2.8111	2.7184	9.7251	5.942	16.184	0.1117	0.54721	0.60005	3.8127
-2.8107	2.7291	9.8009	5.9507	16.331	0.11699	0.57314	0.58758	3.7476
-2.8103	2.7399	9.8787	5.9606	16.48	0.12249	0.60006	0.5752	3.6823
-2.8099	2.7508	9.9584	5.9613	16.623	0.12819	0.62799	0.56291	3.6169
-2.8095	2.7617	10.04	5.974	16.777	0.1341	0.65696	0.55072	3.5513
-2.8091	2.7726	10.123	5.9877	16.934	0.14023	0.687	0.53863	3.4856
-2.8087	2.7836	10.208	6.0024	17.092	0.14658	0.71811	0.52665	3.4199
-2.8083	2.7946	10.294	6.018	17.252	0.15316	0.75034	0.51477	3.3541
-2.8079	2.8057	10.381	6.0344	17.413	0.15997	0.7837	0.50301	3.2884
-2.8075	2.8167	10.469	6.0521	17.574	0.16702	0.81822	0.49137	3.2228
-2.8071	2.833	10.572	6.0713	17.737	0.1743	0.85391	0.47985	3.1573
-2.8067	2.8444	10.663	6.0913	17.901	0.18184	0.89081	0.46845	3.0919
-2.8063	2.8558	10.755	6.1118	18.066	0.18962	0.92893	0.45718	3.0268
-2.8059	2.8673	10.848	6.133	18.231	0.19765	0.96829	0.44603	2.9618
-2.8055	2.8787	10.941	6.1548	18.396	0.20594	1.0089	0.43502	2.8972
-2.8051	2.8901	11.035	6.177	18.562	0.2145	1.0508	0.42415	2.8329
-2.8047	2.9015	11.129	6.1998	18.727	0.22332	1.094	0.40594	2.7674
-2.8043	2.9129	11.223	6.2229	18.892	0.23241	1.1386	0.39578	2.7041
-2.8039	2.9243	11.317	6.2682	19.064	0.24177	1.1844	0.38575	2.6412
-2.8035	2.9356	11.411	6.2934	19.228	0.25141	1.2317	0.37583	2.5788
-2.8031	2.9469	11.505	6.3189	19.392	0.26133	1.2803	0.3741	2.5769
-2.8027	2.9581	11.598	6.3447	19.554	0.27154	1.3303	0.36494	2.5191
-2.8023	2.9692	11.692	6.3708	19.716	0.28203	1.3816	0.35594	2.4622
-2.8019	2.9803	11.784	6.3971	19.876	0.2928	1.4344	0.34711	2.406
-2.8015	2.9912	11.876	6.4235	20.035	0.30387	1.4887	0.33844	2.3506
-2.8011	3.0021	11.967	6.4402	20.184	0.31523	1.5443	0.32994	2.2962
-2.8007	3.0128	12.058	6.4685	20.392	0.32688	1.6014	0.32161	2.2426
-2.8003	3.0235	12.147	6.4971	20.549	0.33883	1.6599	0.31347	2.19
-2.7999	3.034	12.236	6.5257	20.704	0.35108	1.7199	0.3055	2.1384
-2.7995	3.0443	12.323	6.5443	20.813	0.36362	1.7814	0.29772	2.0878
-2.7991	3.0545	12.409	6.5733	20.966	0.37646	1.8443	0.29012	2.0383
-2.7987	3.0645	12.494	6.6022	21.117	0.38959	1.9086	0.28272	1.9899
-2.7983	3.0743	12.577	6.631	21.265	0.40303	1.9744	0.27551	1.9426
-2.7979	3.0839	12.659	6.6596	21.411	0.41676	2.0417	0.26849	1.8964
-2.7975	3.0933	12.74	6.6879	21.554	0.43078	2.1104	0.26167	1.8514
-2.7971	3.1025	12.818	6.6958	21.641	0.4451	2.1805	0.25505	1.8077
-2.7967	3.1115	12.895	6.7249	21.781	0.45971	2.2521	0.24863	1.7652
-2.7963	3.1202	12.97	6.7536	21.917	0.47461	2.3251	0.24242	1.7239
-2.7959	3.1286	13.044	6.7717	22.054	0.4898	2.3995	0.23641	1.6839
-2.7955	3.1368	13.115	6.8003	22.183	0.50527	2.4753	0.23061	1.6453
-2.7951	3.1447	13.184	6.8284	22.309	0.52103	2.5525	0.22502	1.6079
-2.7947	3.1522	13.251	6.8562	22.432	0.53706	2.631	0.21964	1.572
-2.7943	3.1595	13.316	6.873	22.554	0.55336	2.7109	0.21447	1.5374
-2.7939	3.1665	13.379	6.9004	22.668	0.56992	2.792	0.20952	1.5042
-2.7935	3.1731	13.44	6.9273	22.779	0.58675	2.8745	0.19719	1.4757
-2.7931	3.1793	13.498	6.9537	22.886	0.60384	2.9582	0.19312	1.4452
-2.7927	3.1852	13.554	6.9796	22.989	0.62117	3.0431	0.18923	1.4161
-2.7923	3.1907	13.607	7.0049	23.088	0.63874	3.1292	0.18555	1.3885
-2.7919	3.1959	13.658	7.0297	23.183	0.65655	3.2164	0.18206	1.3624
-2.7915	3.2006	13.706	7.0435	23.267	0.67459	3.3048	0.17877	1.3378
-2.7911	3.2049	13.752	7.0679	23.354	0.69284	3.3942	0.17568	1.3147
-2.7907	3.2088	13.795	7.0916	23.438	0.71131	3.4847	0.17279	1.2931
-2.7903	3.2176	13.847	7.1148	23.517	0.72997	3.5761	0.17011	1.273
-2.7899	3.221	13.885	7.1375	23.591	0.74882	3.6685	0.16764	1.2545
-2.7895	3.2239	13.921	7.1595	23.662	0.76786	3.7617	0.16537	1.2375
-2.7891	3.2264	13.954	7.181	23.729	0.78706	3.8558	0.16331	1.2221
-2.7887	3.2285	13.984	7.2019	23.791	0.80642	3.9506	0.16145	1.2082
-2.7883	3.2301	14.012	7.2223	23.849	0.82592	4.0462	0.15981	1.1959
-2.7879	3.2312	14.036	7.2421	23.903	0.84556	4.1424	0.15838	1.1852
-2.7875	3.2319	14.058	7.2614	23.952	0.86532	4.2392	0.15716	1.1761
-2.7871	3.2321	14.077	7.2801	23.998	0.88519	4.3365	0.15615	1.1685
-2.7867	3.2318	14.093	7.2983	24.039	0.90515	4.4343	0.15535	1.1625
-2.7863	3.231	14.107	7.316	24.076	0.92519	4.5325	0.15476	1.1581
-2.7859	3.2297	14.117	7.3331	24.109	0.9453	4.631	0.15439	1.1554
-2.7855	3.228	14.124	7.3498	24.138	0.96546	4.7298	0.15423	1.1542
-2.7851	3.2257	14.129	7.3659	24.163	0.98565	4.8287	0.15429	1.1546
-2.7847	3.2179	14.135	7.3714	24.188	1.0059	4.9277	0.15455	1.1566
-2.7843	3.2149	14.133	7.3872	24.205	1.0261	5.0267	0.16297	1.2195
-2.7839	3.2114	14.129	7.4025	24.218	1.0463	5.1257	0.16415	1.2284
-2.7835	3.2074	14.122	7.4173	24.227	1.0665	5.2246	0.16557	1.239
-2.7831	3.2028	14.111	7.4423	24.231	1.0866	5.3232	0.16722	1.2514
-2.7827	3.1977	14.098	7.4568	24.232	1.1067	5.4215	0.16912	1.2656
-2.7823	3.1921	14.082	7.4708	24.23	1.1266	5.5194	0.17126	1.2816
-2.7819	3.1859	14.063	7.4845	24.225	1.1465	5.6169	0.17365	1.2994
-2.7815	3.1792	14.042	7.4978	24.215	1.1663	5.7137	0.17627	1.3191
-2.7811	3.172	14.017	7.5107	24.203	1.186	5.81	0.17914	1.3405
-2.7807	3.1643	13.99	7.5232	24.187	1.2054	5.9054	0.18225	1.3638
-2.7803	3.156	13.959	7.5353	24.167	1.2248	6.0001	0.1856	1.3889
-2.7799	3.1473	13.926	7.5472	24.145	1.2439	6.0938	0.1892	1.4158
-2.7795	3.138	13.891	7.5587	24.119	1.2628	6.1865	0.19304	1.4446
-2.7791	3.1282	13.852	7.5698	24.09	1.2815	6.2781	0.19712	1.4751
-2.7787	3.113	13.816	7.5704	24.012	1.3	6.3686	0.20145	1.5075
-2.7783	3.1025	13.771	7.5816	23.98	1.3182	6.4577	0.20602	1.5417
-2.7779	3.0915	13.725	7.5925	23.945	1.3361	6.5455	0.21084	1.5778
-2.7775	3.08	13.675	7.5929	23.901	1.3537	6.6318	0.2159	1.6157
-2.7771	3.0681	13.624	7.6148	23.86	1.371	6.7165	0.22121	1.6554
-2.7767	3.0556	13.569	7.6261	23.816	1.388	6.7997	0.22675	1.6969
-2.7763	3.0427	13.513	7.637	23.77	1.4046	6.8811	0.23254	1.7402
-2.7759	3.0345	13.449	7.6477	23.722	1.4208	6.9607	0.23857	1.7853
-2.7755	3.0209	13.387	7.6692	23.667	1.4367	7.0383	0.24484	1.8322
-2.7751	3.007	13.323	7.6801	23.613	1.4522	7.1141	0.25136	1.881
-2.7747	2.9926	13.257	7.6908	23.557	1.4672	7.1877	0.25811	1.9315
-2.7743	2.9778	13.188	7.7013	23.499	1.4818	7.2592	0.2651	1.9838
-2.7739	2.9627	13.118	7.7117	23.438	1.4959	7.3285	0.27232	2.0379
-2.7735	2.9524	13.041	7.7325	23.422	1.5096	7.3955	0.27978	2.0937
-2.7731	2.9368	12.966	7.7431	23.36	1.5228	7.4601	0.28748	2.1513
-2.7727	2.9208	12.89	7.7537	23.296	1.5355	7.5223	0.29541	2.2106
-2.7723	2.9098	12.807	7.7642	23.231	1.5477	7.582	0.30357	2.2717
-2.7719	2.8935	12.726	7.7746	23.164	1.5593	7.6391	0.31195	2.3344
-2.7715	2.877	12.644	7.7848	23.096	1.5704	7.6935	0.32057	2.3989
-2.7711	2.8602	12.561	7.795	23.026	1.581	7.7452	0.3294	2.465
-2.7707	2.8431	12.476	7.8051	22.954	1.591	7.7942	0.33846	2.5328
-2.7703	2.8258	12.389	7.8152	22.882	1.6004	7.8403	0.34774	2.6023
-2.7699	2.8083	12.301	7.8251	22.808	1.6092	7.8835	0.35724	2.6733
-2.7695	2.7906	12.212	7.835	22.733	1.6174	7.9238	0.36695	2.746
-2.7691	2.7727	12.122	7.8448	22.656	1.6251	7.9612	0.37686	2.8202
-2.7687	2.7546	12.031	7.8545	22.579	1.6321	7.9955	0.39529	2.8919
-2.7683	2.7364	11.939	7.8641	22.501	1.6384	8.0267	0.40613	2.9689
-2.7679	2.7184	11.88	7.8737	22.422	1.6442	8.0548	0.41719	3.0475
-2.7675	2.7006	11.788	7.8831	22.342	1.6493	8.0799	0.42067	3.069
-2.7671	2.6826	11.696	7.8925	22.261	1.6538	8.1017	0.43263	3.1539
-2.7667	2.6645	11.603	7.9018	22.18	1.6576	8.1204	0.4448	3.2399
-2.7663	2.6464	11.51	7.911	22.098	1.6607	8.1358	0.45715	3.3272
-2.7659	2.6283	11.417	7.9201	22.015	1.6632	8.148	0.4697	3.4156
-2.7655	2.6101	11.325	7.9291	21.932	1.665	8.157	0.48244	3.5051
-2.7651	2.5919	11.232	7.938	21.848	1.6662	8.1627	0.49536	3.5958
-2.7647	2.5737	11.139	7.9467	21.764	1.6667	8.1651	0.50846	3.6875
-2.7643	2.5555	11.047	7.9553	21.679	1.6665	8.1643	0.52174	3.7802
-2.7639	2.5324	10.96	7.9638	21.594	1.6657	8.1602	0.5352	3.874
-2.7635	2.5147	10.869	7.9721	21.509	1.6642	8.1529	0.54883	3.9687
-2.7631	2.497	10.779	7.9802	21.423	1.662	8.1423	0.56263	4.0643
-2.7627	2.4794	10.689	7.9882	21.337	1.6592	8.1285	0.57659	4.1608
-2.7623	2.4619	10.601	7.996	21.251	1.6557	8.1114	0.59071	4.2581
-2.7619	2.4446	10.514	8.0036	21.164	1.6516	8.0912	0.605	4.3562
-2.7615	2.4273	10.428	8.0218	21.074	1.6468	8.0677	0.61943	4.455
-2.7611	2.4103	10.343	8.0405	20.994	1.6414	8.0412	0.63401	4.5546
-2.7607	2.3934	10.26	8.0488	20.907	1.6353	8.0115	0.64874	4.6548
-2.7603	2.3767	10.178	8.0569	20.821	1.6286	7.9787	0.6636	4.7555
-2.7599	2.3602	10.098	8.0649	20.734	1.6213	7.9429	0.67859	4.8569
-2.7595	2.3439	10.02	8.0727	20.647	1.6134	7.904	0.69372	4.9587
-2.7591	2.3279	9.9445	8.0802	20.561	1.6049	7.8623	0.70896	5.0609
-2.7587	2.3174	9.8694	8.0876	20.474	1.5958	7.8176	0.72432	5.1635
-2.7583	2.3022	9.7977	8.0947	20.388	1.586	7.77	0.73979	5.2664
-2.7579	2.2873	9.7283	8.1016	20.301	1.5758	7.7197	0.75537	5.3696
-2.7575	2.2727	9.6613	8.1083	20.215	1.5649	7.6666	0.77104	5.473
-2.7571	2.2585	9.5966	8.1147	20.129	1.5536	7.6108	0.78681	5.5765
-2.7567	2.2446	9.5346	8.1208	20.043	1.5416	7.5525	0.80266	5.6801
-2.7563	2.2311	9.4751	8.1373	19.953	1.5292	7.4915	0.81859	5.7837
-2.7559	2.218	9.4182	8.1435	19.867	1.5163	7.4281	0.83459	5.8872
-2.7555	2.2052	9.3641	8.1495	19.781	1.5028	7.3623	0.85066	5.9906
-2.7551	2.1928	9.3127	8.1553	19.696	1.4889	7.2942	0.86679	6.0939
-2.7547	2.1809	9.2641	8.1508	19.615	1.4745	7.2237	0.88297	6.1969
-2.7543	2.1693	9.2184	8.1566	19.53	1.4597	7.1512	0.89919	6.2995
-2.7539	2.1582	9.1755	8.162	19.445	1.4445	7.0765	0.91545	6.4018
-2.7535	2.1475	9.1355	8.1672	19.36	1.4288	6.9997	0.93174	6.5036
-2.7531	2.1373	9.0985	8.1721	19.276	1.4128	6.9211	0.94805	6.605
-2.7527	2.1276	9.0644	8.1766	19.192	1.3963	6.8406	0.96438	6.7057
-2.7523	2.1183	9.0331	8.1808	19.108	1.3795	6.7583	0.98072	6.8057
-2.7519	2.1095	9.0048	8.1847	19.025	1.3624	6.6744	0.99705	6.9051
-2.7515	2.1011	8.9795	8.1882	18.942	1.3449	6.5888	1.0134	7.0036
-2.7511	2.0933	8.9569	8.1914	18.86	1.3272	6.5018	1.0297	7.1013
-2.7507	2.0859	8.9373	8.1943	18.778	1.3091	6.4133	1.046	7.198
-2.7503	2.0791	8.9205	8.1969	18.696	1.2908	6.3235	1.0622	7.2938
-2.7499	2.0728	8.9065	8.1991	18.616	1.2722	6.2325	1.0784	7.3885
-2.7495	2.0669	8.8952	8.201	18.535	1.2534	6.1403	1.0946	7.482
-2.7491	2.0616	8.8866	8.2026	18.455	1.2344	6.0471	1.1107	7.5744
-2.7487	2.0568	8.8807	8.2039	18.376	1.2151	5.9529	1.1268	7.6655
-2.7483	2.0531	8.8682	8.2048	18.298	1.1957	5.8578	1.1428	7.7553
-2.7479	2.0499	8.8677	8.2054	18.22	1.1762	5.7619	1.1587	7.8437
-2.7475	2.0524	8.8649	8.2057	18.143	1.1564	5.6654	1.1745	7.9306
-2.7471	2.0506	8.869	8.2056	18.066	1.1366	5.5682	1.1902	8.016
-2.7467	2.0493	8.8753	8.2053	17.99	1.1167	5.4705	1.2058	8.0999
-2.7463	2.0487	8.884	8.2046	17.916	1.0966	5.3724	1.2213	8.1821
-2.7459	2.0485	8.8948	8.2037	17.841	1.0765	5.2739	1.2367	8.2626
-2.7455	2.0489	8.9077	8.2132	17.805	1.0564	5.1752	1.252	8.3414
-2.7451	2.0499	8.9227	8.2123	17.735	1.0362	5.0763	1.2671	8.4184
-2.7447	2.0514	8.9398	8.2111	17.666	1.016	4.9772	1.2821	8.4935
-2.7443	2.0534	8.9588	8.2097	17.597	0.99576	4.8782	1.2969	8.5667
-2.7439	2.056	8.9797	8.2081	17.53	0.97555	4.7792	1.3116	8.638
-2.7435	2.0592	9.0025	8.2063	17.464	0.95537	4.6804	1.3261	8.7073
-2.7431	2.0629	9.027	8.2042	17.4	0.93524	4.5817	1.3405	8.7746
-2.7427	2.0671	9.0533	8.2019	17.336	0.91516	4.4834	1.3546	8.8397
-2.7423	2.0718	9.0813	8.1994	17.274	0.89516	4.3854	1.3686	8.9027
-2.7419	2.0771	9.111	8.1967	17.213	0.87524	4.2878	1.3824	8.9636
-2.7415	2.0829	9.1423	8.1939	17.153	0.85543	4.1907	1.396	9.0223
-2.7411	2.0945	9.1702	8.1908	17.095	0.83573	4.0942	1.4094	9.0787
-2.7407	2.1016	9.2043	8.1876	17.038	0.81615	3.9983	1.4225	9.1329
-2.7403	2.1093	9.2399	8.1843	16.983	0.79672	3.9031	1.4355	9.1848
-2.7399	2.1174	9.277	8.1703	16.897	0.77744	3.8086	1.4482	9.2343
-2.7395	2.1212	9.2795	8.1673	16.846	0.75832	3.715	1.4606	9.2815
-2.7391	2.1306	9.3217	8.1641	16.798	0.73937	3.6222	1.4728	9.3263
-2.7387	2.1406	9.365	8.1607	16.75	0.72061	3.5303	1.4848	9.3688
-2.7383	2.151	9.4097	8.1572	16.705	0.70205	3.4393	1.4965	9.4088
-2.7379	2.1618	9.4555	8.1536	16.66	0.68369	3.3494	1.508	9.4464
-2.7375	2.1731	9.5025	8.1498	16.618	0.66554	3.2605	1.5192	9.4816
-2.7371	2.1848	9.5507	8.1459	16.576	0.64762	3.1727	1.5301	9.5144
-2.7367	2.1969	9.6001	8.1419	16.537	0.62993	3.086	1.5407	9.5447
-2.7363	2.2095	9.6506	8.1379	16.499	0.61247	3.0005	1.5511	9.5725
-2.7359	2.2225	9.7023	8.1237	16.434	0.59526	2.9162	1.5611	9.5979
-2.7355	2.2358	9.755	8.1201	16.401	0.57831	2.8331	1.5709	9.6209
-2.7351	2.2496	9.8089	8.1163	16.37	0.56161	2.7513	1.5803	9.6414
-2.7347	2.2637	9.8639	8.1124	16.34	0.54517	2.6708	1.5894	9.6594
-2.7343	2.2781	9.9199	8.1085	16.312	0.52901	2.5916	1.6062	9.7326
-2.7339	2.2929	9.977	8.1044	16.285	0.51312	2.5137	1.6152	9.7493
-2.7335	2.308	10.035	8.1003	16.26	0.4975	2.4373	1.6239	9.7637
-2.7331	2.3235	10.094	8.0961	16.237	0.48217	2.3622	1.6323	9.7759
-2.7327	2.3392	10.154	8.0817	16.187	0.46713	2.2884	1.6404	9.786
-2.7323	2.3552	10.215	8.0779	16.169	0.45237	2.2162	1.6482	9.7939
-2.7319	2.3715	10.277	8.0741	16.151	0.4379	2.1453	1.6556	9.7997
-2.7315	2.3881	10.34	8.0701	16.136	0.42373	2.0759	1.6628	9.8034
-2.7311	2.4049	10.404	8.0661	16.121	0.40985	2.0079	1.6696	9.805
-2.7307	2.4171	10.472	8.0619	16.108	0.39627	1.9413	1.6761	9.8046
-2.7303	2.4346	10.537	8.0577	16.096	0.38299	1.8762	1.6823	9.8023
-2.7299	2.4523	10.603	8.0534	16.085	0.37	1.8126	1.6882	9.798
-2.7295	2.4654	10.673	8.0489	16.076	0.35731	1.7505	1.6938	9.7918
-2.7291	2.4837	10.74	8.0343	16.063	0.34492	1.6897	1.699	9.7837
-2.7287	2.502	10.807	8.0413	16.085	0.33282	1.6305	1.7039	9.7739
-2.7283	2.5258	10.909	8.0379	16.08	0.32102	1.5727	1.7084	9.7623
-2.7279	2.5447	10.98	8.0343	16.078	0.30951	1.5163	1.7127	9.749
-2.7275	2.5636	11.052	8.0306	16.076	0.2983	1.4614	1.7166	9.734
-2.7271	2.5827	11.124	8.0268	16.075	0.28738	1.4079	1.7201	9.7174
-2.7267	2.6017	11.196	8.0338	16.101	0.27675	1.3558	1.7234	9.6992
-2.7263	2.6209	11.269	8.0304	16.103	0.2664	1.3051	1.7263	9.6796
-2.7259	2.64	11.342	8.017	16.082	0.25634	1.2558	1.7289	9.6584
-2.7255	2.6591	11.415	8.014	16.088	0.24656	1.2079	1.7311	9.6359
-2.7251	2.6783	11.488	8.0109	16.094	0.23706	1.1613	1.733	9.612
-2.7247	2.6974	11.561	8.0076	16.101	0.22783	1.1161	1.7346	9.5868
-2.7243	2.7165	11.634	8.0042	16.108	0.21888	1.0723	1.7358	9.5604
-2.7239	2.7355	11.707	8.0006	16.116	0.21019	1.0297	1.7368	9.5327
-2.7235	2.7544	11.78	7.9969	16.124	0.20176	0.98844	1.7374	9.5039
-2.7231	2.7733	11.852	7.993	16.132	0.1936	0.94845	1.7376	9.474
-2.7227	2.792	11.924	7.9889	16.141	0.18569	0.90971	1.7376	9.4431
-2.7223	2.8106	11.996	7.9846	16.15	0.17804	0.87221	1.7372	9.4112
-2.7219	2.8291	12.066	7.9801	16.159	0.17063	0.83592	1.7365	9.3783
-2.7215	2.8474	12.136	7.9754	16.168	0.16347	0.80081	1.7355	9.3445
-2.7211	2.8656	12.206	7.9705	16.177	0.15654	0.76688	1.7342	9.3099
-2.7207	2.8836	12.274	7.9653	16.186	0.14985	0.73409	1.7326	9.2744
-2.7203	2.9014	12.341	7.9599	16.195	0.14338	0.70242	1.7307	9.2382
-2.7199	2.919	12.408	7.9542	16.204	0.13714	0.67185	1.7284	9.2013
-2.7195	2.9365	12.516	7.9482	16.212	0.13112	0.64235	1.7259	9.1636
-2.7191	2.9542	12.582	7.942	16.22	0.12531	0.6139	1.7231	9.1254
-2.7187	2.9717	12.647	7.9354	16.228	0.11971	0.58647	1.72	9.0865
-2.7183	2.9889	12.71	7.9285	16.236	0.11432	0.56005	1.7166	9.0471
-2.7179	3.0058	12.772	7.9213	16.242	0.10913	0.53461	1.7129	9.0071
-2.7175	3.0176	12.838	7.9137	16.249	0.10413	0.51011	1.709	8.9666
-2.7171	3.0342	12.897	7.9057	16.255	0.099316	0.48654	1.7048	8.9257
-2.7167	3.0505	12.954	7.8974	16.26	0.094689	0.46388	1.7003	8.8843
-2.7163	3.0664	13.01	7.8887	16.264	0.090243	0.4421	1.6955	8.8424
-2.7159	3.082	13.064	7.8795	16.268	0.08597	0.42117	1.6905	8.8002
-2.7155	3.0925	13.107	7.87	16.27	0.081867	0.40107	1.6853	8.7577
-2.7151	3.1129	13.153	7.86	16.272	0.077929	0.38177	1.6798	8.7147
-2.7147	3.128	13.202	7.8495	16.274	0.074151	0.36326	1.6741	8.6715
-2.7143	3.1427	13.249	7.8386	16.274	0.070527	0.34551	1.6682	8.6279
-2.7139	3.1571	13.294	7.8272	16.273	0.067054	0.3285	1.662	8.5841
-2.7135	3.171	13.337	7.8154	16.271	0.063727	0.3122	1.6556	8.5399
-2.7131	3.1845	13.378	7.803	16.268	0.06054	0.29658	1.6491	8.4955
-2.7127	3.1977	13.416	7.7801	16.243	0.057489	0.28164	1.6423	8.4509
-2.7123	3.2104	13.453	7.7673	16.239	0.054571	0.26734	1.6353	8.406
-2.7119	3.2227	13.488	7.7646	16.257	0.05178	0.25367	1.6282	8.3609
-2.7115	3.2346	13.52	7.7513	16.253	0.049112	0.2406	1.6208	8.3155
-2.7111	3.2461	13.55	7.7374	16.247	0.046563	0.22811	1.6133	8.27
-2.7107	3.2622	13.582	7.7229	16.24	0.044128	0.21618	1.6057	8.2243
-2.7103	3.2731	13.608	7.7079	16.232	0.041804	0.2048	1.5979	8.1784
-2.7099	3.2836	13.632	7.6923	16.222	0.039587	0.19394	1.5899	8.1323
-2.7095	3.2937	13.654	7.6762	16.212	0.037472	0.18358	1.5818	8.086
-2.7091	3.3034	13.674	7.6594	16.201	0.035456	0.1737	1.5736	8.0396
-2.7087	3.3126	13.692	7.6421	16.188	0.033535	0.16429	1.5653	7.993
-2.7083	3.3214	13.708	7.6241	16.174	0.031706	0.15533	1.5568	7.9463
-2.7079	3.3298	13.721	7.6056	16.159	0.029964	0.14679	1.5482	7.8994
-2.7075	3.3378	13.733	7.5761	16.12	0.028307	0.13867	1.5396	7.8525
-2.7071	3.3454	13.743	7.557	16.104	0.02673	0.13095	1.5308	7.8054
-2.7067	3.3525	13.75	7.5372	16.087	0.025232	0.12361	1.522	7.7583
-2.7063	3.3592	13.756	7.5169	16.069	0.023808	0.11663	1.5131	7.711
-2.7059	3.3655	13.76	7.4959	16.05	0.022455	0.11001	1.5041	7.6637
-2.7055	3.3664	13.752	7.4743	16.03	0.02117	0.10371	1.4951	7.6164
-2.7051	3.3722	13.753	7.4521	16.009	0.019951	0.097742	1.486	7.569
-2.7047	3.3825	13.747	7.4292	15.987	0.018795	0.092077	1.4769	7.5216
-2.7043	3.3877	13.744	7.4058	15.964	0	0	1.4678	7.4742
-2.7039	3.3925	13.74	7.3818	15.94	0	0	1.4586	7.4269
-2.7035	3.3969	13.734	7.3571	15.915	0	0	1.4494	7.3797
-2.7031	3.4008	13.726	7.3319	15.89	0	0	1.4402	7.3325
-2.7027	3.4044	13.717	7.3061	15.864	0	0	1.431	7.2855
-2.7023	3.4077	13.707	7.2797	15.837	0	0	1.4217	7.2386
-2.7019	3.4105	13.695	7.2528	15.81	0	0	1.4125	7.1919
-2.7015	3.413	13.682	7.2253	15.782	0	0	1.4034	7.1454
-2.7011	3.4151	13.668	7.1973	15.754	0	0	1.3942	7.0992
-2.7007	3.4168	13.652	7.1688	15.725	0	0	1.385	7.0532
-2.7003	3.4182	13.636	7.1296	15.699	0	0	1.3759	7.0077
-2.6999	3.4192	13.618	7.1006	15.67	0	0	1.3669	6.9624
-2.6995	3.42	13.6	7.0711	15.64	0	0	1.3578	6.9176
-2.6991	3.4203	13.581	7.0411	15.611	0	0	1.3489	6.8733
-2.6987	3.4204	13.56	7.0106	15.581	0	0	1.3399	6.8295
-2.6983	3.4201	13.54	6.9796	15.551	0	0	1.3311	6.7862
-2.6979	3.4196	13.518	6.9482	15.521	0	0	1.3223	6.7435
-2.6975	3.4187	13.496	6.9163	15.492	0	0	1.3135	6.7015
-2.6971	3.4176	13.473	6.884	15.463	0	0	1.3048	6.6602
-2.6967	3.4162	13.45	6.8513	15.434	0	0	1.2962	6.6196
-2.6963	3.4145	13.426	6.8181	15.405	0	0	1.2877	6.5797
-2.6959	3.4125	13.402	6.7846	15.377	0	0	1.2793	6.5407
-2.6955	3.4103	13.377	6.7615	15.345	0	0	1.2709	6.5026
-2.6951	3.4078	13.352	6.718	15.288	0	0	1.2626	6.4654
-2.6947	3.4103	13.339	6.6847	15.263	0	0	1.2544	6.4291
-2.6943	3.4077	13.314	6.6512	15.239	0	0	1.2463	6.3938
-2.6939	3.41	13.294	6.6173	15.215	0	0	1.2383	6.3596
-2.6935	3.4074	13.27	6.5832	15.193	0	0	1.2304	6.3264
-2.6931	3.4045	13.245	6.5489	15.171	0	0	1.2225	6.2942
-2.6927	3.4015	13.22	6.5143	15.151	0	0	1.2148	6.2632
-2.6923	3.3983	13.196	6.4795	15.131	0	0	1.2071	6.2334
-2.6919	3.395	13.171	6.4446	15.112	0	0	1.1995	6.2047
-2.6915	3.3969	13.16	6.4095	15.095	0	0	1.192	6.1771
-2.6911	3.3937	13.137	6.3742	15.079	0	0	1.1846	6.1508
-2.6907	3.3904	13.114	6.3497	15.059	0	0	1.1773	6.1256
-2.6903	3.387	13.091	6.3149	15.046	0	0	1.1701	6.1016
-2.6899	3.3836	13.068	6.28	15.033	0	0	1.1629	6.0789
-2.6895	3.38	13.045	6.2451	15.022	0	0	1.1558	6.0572
-2.6891	3.3765	13.023	6.2102	15.012	0	0	1.1488	6.0368
-2.6887	3.3729	13.001	6.1753	15.004	0	0	1.1419	6.0175
-2.6883	3.3693	12.979	6.1405	14.997	0	0	1.1351	5.9994
-2.6879	3.3657	12.958	6.1057	14.991	0	0	1.1283	5.9823
-2.6875	3.3673	12.931	6.0709	14.987	0	0	1.1215	5.9663
-2.6871	3.3591	12.914	6.0263	14.971	0	0	1.1149	5.9513
-2.6867	3.3612	12.895	5.9923	14.97	0	0	1.1083	5.9373
-2.6863	3.3586	12.874	5.9584	14.972	0	0	1.1017	5.9243
-2.6859	3.356	12.854	5.9246	14.974	0	0	1.0952	5.9121
-2.6855	3.3534	12.834	5.8909	14.978	0	0	1.0887	5.9008
-2.6851	3.351	12.815	5.8679	15.023	0	0	1.0823	5.8902
-2.6847	3.3486	12.796	5.8352	15.032	0	0	1.0759	5.8804
-2.6843	3.3463	12.777	5.8027	15.042	0	0	1.0696	5.8711
-2.6839	3.3441	12.758	5.7498	15.062	0	0	1.0632	5.8625
-2.6835	3.3421	12.74	5.719	15.074	0	0	1.0569	5.8543
-2.6831	3.3402	12.723	5.6883	15.087	0	0	1.0428	5.7929
-2.6827	3.3384	12.706	5.6578	15.102	0	0	1.0453	5.7824
-2.6823	3.3367	12.689	5.6276	15.117	0	0	1.04	5.7778
-2.6819	3.3352	12.672	5.5975	15.134	0	0	1.0346	5.7732
-2.6815	3.3339	12.656	5.5678	15.151	0	0	1.0293	5.7686
-2.6811	3.3327	12.641	5.5383	15.17	0	0	1.024	5.7639
-2.6807	3.3318	12.626	5.499	15.147	0	0	1.0186	5.7591
-2.6803	3.331	12.611	5.4706	15.169	0	0	1.0133	5.754
-2.6799	3.3304	12.597	5.4426	15.191	0	0	1.0079	5.7485
-2.6795	3.33	12.583	5.4148	15.214	0	0	1.0026	5.7427
-2.6791	3.3298	12.57	5.3874	15.237	0	0	0.99721	5.7364
-2.6787	3.3298	12.557	5.3603	15.261	0	0	0.99182	5.7296
-2.6783	3.3301	12.545	5.3334	15.284	0	0	0.98641	5.7221
-2.6779	3.3306	12.533	5.307	15.307	0	0	0.98098	5.714
-2.6775	3.3313	12.521	5.2808	15.331	0	0	0.97553	5.7051
-2.6771	3.3322	12.51	5.2551	15.354	0	0	0.97005	5.6954
-2.6767	3.3968	12.494	5.2296	15.376	0	0	0.96455	5.6849
-2.6763	3.4021	12.484	5.2046	15.399	0	0	0.95901	5.6734
-2.6759	3.4079	12.475	5.1799	15.421	0	0	0.95345	5.6609
-2.6755	3.4142	12.466	5.1556	15.442	0	0	0.94786	5.6474
-2.6751	3.4209	12.457	5.1317	15.462	0	0	0.94223	5.6328
-2.6747	3.4282	12.449	5.1082	15.482	0	0	0.93658	5.617
-2.6743	3.4359	12.442	5.0851	15.501	0	0	0.93089	5.6001
-2.6739	3.4442	12.435	5.0625	15.518	0	0	0.92516	5.582
-2.6735	3.4454	12.429	5.0402	15.535	0	0	0.91941	5.5626
-2.6731	3.4447	12.424	5.0183	15.551	0	0	0.91362	5.5419
-2.6727	3.4445	12.419	4.9968	15.565	0	0	0.9078	5.5199
-2.6723	3.4448	12.415	4.9758	15.578	0	0	0.90195	5.4967
-2.6719	3.4456	12.411	4.9551	15.589	0.018795	0.092077	0.89607	5.472
-2.6715	3.4469	12.408	4.9349	15.599	0.019951	0.097742	0.89016	5.446
-2.6711	3.4487	12.406	4.9151	15.608	0.02117	0.10371	0.88422	5.4186
-2.6707	3.4509	12.405	4.8957	15.614	0.022455	0.11001	0.87826	5.3898
-2.6703	3.3957	12.409	4.8768	15.619	0.023808	0.11663	0.87227	5.3597
-2.6699	3.4023	12.409	4.8582	15.623	0.025232	0.12361	0.86626	5.3282
-2.6695	3.4092	12.41	4.8401	15.624	0.02673	0.13095	0.86023	5.2953
-2.6691	3.4163	12.411	4.8223	15.624	0.028307	0.13867	0.85419	5.261
-2.6687	3.4237	12.413	4.805	15.621	0.029964	0.14679	0.84813	5.2253
-2.6683	3.4314	12.416	4.7881	15.617	0.031706	0.15533	0.84207	5.1884
-2.6679	3.4393	12.42	4.7716	15.611	0.033535	0.16429	0.836	5.1501
-2.6675	3.4474	12.425	4.7555	15.602	0.035456	0.1737	0.82993	5.1105
-2.6671	3.4558	12.431	4.7398	15.592	0.037472	0.18358	0.82385	5.0697
-2.6667	3.4645	12.437	4.7245	15.579	0.039587	0.19394	0.81779	5.0276
-2.6663	3.4734	12.444	4.7203	15.613	0.041804	0.2048	0.81174	4.9843
-2.6659	3.4825	12.453	4.7065	15.599	0.044128	0.21618	0.8057	4.9399
-2.6655	3.4919	12.462	4.693	15.583	0.046563	0.22811	0.79968	4.8944
-2.6651	3.5014	12.472	4.68	15.565	0.049112	0.2406	0.79368	4.8479
-2.6647	3.5112	12.483	4.6673	15.546	0.05178	0.25367	0.78772	4.8003
-2.6643	3.5212	12.496	4.6551	15.524	0.054571	0.26734	0.78179	4.7518
-2.6639	3.5314	12.509	4.6433	15.5	0.057489	0.28164	0.76843	4.6473
-2.6635	3.5418	12.523	4.6318	15.475	0.06054	0.29658	0.76303	4.6004
-2.6631	3.5523	12.538	4.6104	15.448	0.063727	0.3122	0.75766	4.5526
-2.6627	3.563	12.554	4.6003	15.418	0.067054	0.3285	0.75232	4.504
-2.6623	3.5739	12.571	4.5907	15.387	0.070527	0.34551	0.74703	4.4546
-2.6619	3.585	12.59	4.5813	15.354	0.074151	0.36326	0.74178	4.4046
-2.6615	3.5961	12.609	4.5723	15.319	0.077929	0.38177	0.73659	4.3541
-2.6611	3.6075	12.629	4.5636	15.283	0.081867	0.40107	0.73146	4.3031
-2.6607	3.6189	12.651	4.5553	15.244	0.08597	0.42117	0.72641	4.2517
-2.6603	3.6304	12.673	4.5473	15.205	0.090243	0.4421	0.72143	4.2001
-2.6599	3.642	12.697	4.5396	15.163	0.094689	0.46388	0.71653	4.1484
-2.6595	3.6537	12.722	4.5322	15.12	0.099316	0.48654	0.71172	4.0966
-2.6591	3.6655	12.747	4.5252	15.076	0.10413	0.51011	0.70701	4.0449
-2.6587	3.6773	12.774	4.5184	15.03	0.10913	0.53461	0.7024	3.9935
-2.6583	3.6892	12.802	4.5119	14.983	0.11432	0.56005	0.69789	3.9424
-2.6579	3.7011	12.831	4.5057	14.935	0.11971	0.58647	0.69351	3.8918
-2.6575	3.7181	12.86	4.4999	14.885	0.12531	0.6139	0.68924	3.8418
-2.6571	3.7303	12.891	4.4841	14.837	0.13112	0.64235	0.6851	3.7925
-2.6567	3.7425	12.922	4.4794	14.785	0.13714	0.67185	0.6811	3.7442
-2.6563	3.7547	12.955	4.4748	14.732	0.14338	0.70242	0.67723	3.6969
-2.6559	3.762	12.964	4.4705	14.679	0.14985	0.73409	0.6735	3.6507
-2.6555	3.8359	12.994	4.4563	14.628	0.15654	0.76688	0.66993	3.6059
-2.6551	3.8521	13.03	4.453	14.572	0.16347	0.80081	0.6665	3.5626
-2.6547	3.9307	13.061	4.4499	14.516	0.17063	0.83592	0.66324	3.5209
-2.6543	3.9509	13.099	4.4469	14.46	0.17804	0.87221	0.66013	3.4811
-2.6539	3.9644	13.137	4.4441	14.403	0.18569	0.90971	0.65719	3.4431
-2.6535	3.9654	13.166	4.4414	14.346	0.1936	0.94845	0.65442	3.4072
-2.6531	3.9717	13.205	4.4289	14.244	0.20176	0.98844	0.65183	3.3736
-2.6527	3.9782	13.245	4.4271	14.189	0.21019	1.0297	0.6494	3.3423
-2.6523	3.9799	13.265	4.4254	14.133	0.21888	1.0723	0.64716	3.3136
-2.6519	3.987	13.307	4.4238	14.077	0.22783	1.1161	0.6451	3.2874
-2.6515	3.9941	13.349	4.4222	14.021	0.23706	1.1613	0.64322	3.2641
-2.6511	4.0012	13.392	4.4207	13.965	0.24656	1.2079	0.64152	3.2435
-2.6507	4.0084	13.434	4.4192	13.908	0.25634	1.2558	0.64002	3.226
-2.6503	4.0156	13.477	4.4178	13.852	0.2664	1.3051	0.63869	3.2115
-2.6499	4.0228	13.52	4.4165	13.796	0.27675	1.3558	0.63756	3.2001
-2.6495	4.0299	13.562	4.4152	13.74	0.28738	1.4079	0.63661	3.1919
-2.6491	4.037	13.604	4.4139	13.684	0.2983	1.4614	0.63586	3.187
-2.6487	4.044	13.646	4.4125	13.629	0.30951	1.5163	0.6277	3.1912
-2.6483	4.0509	13.687	4.4112	13.574	0.32102	1.5727	0.62776	3.1924
-2.6479	3.998	13.734	4.4099	13.519	0.33282	1.6305	0.62798	3.1969
-2.6475	4.0081	13.774	4.4086	13.465	0.34492	1.6897	0.62837	3.2046
-2.6471	4.0179	13.813	4.4072	13.411	0.35731	1.7505	0.62891	3.2156
-2.6467	4.0273	13.852	4.4058	13.357	0.37	1.8126	0.62961	3.2297
-2.6463	4.0364	13.89	4.4043	13.304	0.38299	1.8762	0.63047	3.2468
-2.6459	4.0451	13.927	4.4027	13.252	0.39627	1.9413	0.63149	3.267
-2.6455	4.0534	13.962	4.401	13.2	0.40985	2.0079	0.63265	3.29
-2.6451	4.0613	13.997	4.3993	13.149	0.42373	2.0759	0.63397	3.3159
-2.6447	4.0688	14.031	4.3974	13.098	0.4379	2.1453	0.63543	3.3444
-2.6443	4.0758	14.063	4.3954	13.048	0.45237	2.2162	0.63703	3.3754
-2.6439	4.0825	14.094	4.3932	12.998	0.46713	2.2884	0.63877	3.4089
-2.6435	4.0887	14.123	4.3909	12.95	0.48217	2.3622	0.64064	3.4446
-2.6431	4.0945	14.151	4.3885	12.901	0.4975	2.4373	0.64265	3.4824
-2.6427	4.0998	14.177	4.3969	12.9	0.53163	2.4972	0.64477	3.5223
-2.6423	4.1046	14.201	4.3947	12.856	0.54866	2.5741	0.64701	3.5639
-2.6419	4.109	14.223	4.3923	12.812	0.56603	2.6522	0.64937	3.6072
-2.6415	4.1129	14.244	4.3794	12.773	0.58373	2.7317	0.65183	3.6521
-2.6411	4.1163	14.262	4.367	12.734	0.60177	2.8124	0.65438	3.6983
-2.6407	4.1192	14.278	4.3652	12.692	0.62013	2.8943	0.65703	3.7457
-2.6403	4.1216	14.292	4.3632	12.651	0.63882	2.9774	0.65977	3.7942
-2.6399	4.1235	14.304	4.3608	12.611	0.65783	3.0616	0.66258	3.8437
-2.6395	4.1249	14.313	4.3688	12.567	0.67716	3.1469	0.66547	3.8939
-2.6391	4.1258	14.32	4.3664	12.528	0.6968	3.2333	0.66841	3.9447
-2.6387	4.1213	14.317	4.3639	12.489	0.71676	3.3208	0.67141	3.9961
-2.6383	4.1214	14.319	4.361	12.451	0.73702	3.4092	0.67446	4.0478
-2.6379	4.121	14.319	4.3683	12.457	0.75757	3.4986	0.67754	4.0997
-2.6375	4.12	14.316	4.3655	12.422	0.77842	3.5888	0.68066	4.1518
-2.6371	4.1185	14.31	4.3624	12.388	0.79956	3.6799	0.69197	4.1986
-2.6367	4.1164	14.301	4.359	12.355	0.82097	3.7718	0.69562	4.2503
-2.6363	4.1138	14.289	4.3553	12.323	0.84266	3.8644	0.6993	4.3017
-2.6359	4.1107	14.274	4.3413	12.294	0.86462	3.9577	0.70301	4.3528
-2.6355	4.1069	14.257	4.3376	12.263	0.88683	4.0516	0.70673	4.4034
-2.6351	4.1027	14.236	4.3336	12.231	0.90929	4.146	0.71046	4.4534
-2.6347	4.0979	14.212	4.3293	12.201	0.93199	4.241	0.71419	4.5027
-2.6343	4.0925	14.186	4.3246	12.171	0.95492	4.3363	0.72584	4.61
-2.6339	4.0866	14.156	4.3196	12.141	0.97808	4.432	0.73004	4.6614
-2.6335	4.0802	14.123	4.3142	12.112	1.0014	4.528	0.73424	4.712
-2.6331	4.0732	14.087	4.3086	12.083	1.025	4.6242	0.73844	4.7618
-2.6327	4.0657	14.048	4.3026	12.054	1.0488	4.7206	0.74263	4.8107
-2.6323	4.0576	14.006	4.2963	12.027	1.0727	4.817	0.74681	4.8587
-2.6319	4.049	13.961	4.2896	11.999	1.0968	4.9134	0.75096	4.9055
-2.6315	4.0399	13.913	4.2826	11.972	1.1211	5.0097	0.7551	4.9513
-2.6311	4.0303	13.862	4.2754	11.945	1.1455	5.1058	0.76713	4.993
-2.6307	4.0202	13.808	4.2678	11.918	1.1701	5.2017	0.77169	5.0363
-2.6303	4.0095	13.751	4.2599	11.892	1.1948	5.2972	0.77624	5.0784
-2.6299	3.9984	13.692	4.2517	11.867	1.2196	5.3924	0.78077	5.1193
-2.6295	3.9868	13.63	4.2432	11.841	1.2445	5.487	0.78527	5.1587
-2.6291	3.9747	13.565	4.2344	11.816	1.2694	5.5811	0.78976	5.1968
-2.6287	3.9621	13.497	4.2253	11.792	1.2945	5.6745	0.79423	5.2335
-2.6283	3.9442	13.396	4.2159	11.767	1.3196	5.7671	0.79866	5.2687
-2.6279	3.931	13.325	4.2063	11.744	1.3448	5.859	0.80307	5.3025
-2.6275	3.9224	13.277	4.1964	11.72	1.37	5.9499	0.80746	5.3348
-2.6271	3.9038	13.204	4.1863	11.697	1.3952	6.0398	0.81181	5.3656
-2.6267	3.8898	13.128	4.1759	11.674	1.4204	6.1287	0.81613	5.3948
-2.6263	3.8754	13.05	4.1653	11.652	1.4456	6.2164	0.82043	5.4226
-2.6259	3.8605	12.97	4.1545	11.63	1.4708	6.3028	0.82469	5.4487
-2.6255	3.8453	12.889	4.133	11.567	1.496	6.388	0.82893	5.4734
-2.6251	3.8296	12.805	4.1224	11.548	1.5211	6.4717	0.83314	5.4965
-2.6247	3.8136	12.721	4.1116	11.53	1.5462	6.5539	0.83733	5.518
-2.6243	3.7972	12.634	4.1005	11.512	1.5711	6.6346	0.84149	5.5381
-2.6239	3.7805	12.547	4.0893	11.495	1.596	6.7137	0.84564	5.5566
-2.6235	3.7634	12.459	4.0779	11.478	1.6208	6.7911	0.84977	5.5737
-2.6231	3.746	12.37	4.0663	11.461	1.6455	6.8667	0.85388	5.5892
-2.6227	3.7282	12.28	4.0546	11.445	1.67	6.9404	0.86616	5.6054
-2.6223	3.7726	12.183	4.0427	11.43	1.6944	7.0123	0.87076	5.6186
-2.6219	3.7572	12.092	4.0308	11.415	1.7187	7.0822	0.87539	5.6305
-2.6215	3.7354	12.001	4.0187	11.401	1.7428	7.15	0.88005	5.6411
-2.6211	3.6557	11.916	4.0066	11.387	1.7667	7.2158	0.88475	5.6505
-2.6207	3.6372	11.825	3.9944	11.374	1.7904	7.2794	0.8895	5.6588
-2.6203	3.6185	11.734	3.9821	11.361	1.8139	7.3409	0.8943	5.666
-2.6199	3.5995	11.643	3.9699	11.35	1.8372	7.4001	0.89917	5.6722
-2.6195	3.5804	11.554	3.9576	11.339	1.8602	7.4571	0.9041	5.6774
-2.6191	3.561	11.465	3.9453	11.329	1.8831	7.5117	0.91742	5.6882
-2.6187	3.5415	11.377	3.933	11.319	1.9056	7.5641	0.92303	5.6928
-2.6183	3.5218	11.29	3.9208	11.311	1.9279	7.614	0.92876	5.6967
-2.6179	3.502	11.205	3.9194	11.348	1.9499	7.6615	0.93464	5.7002
-2.6175	3.482	11.122	3.9079	11.344	1.9717	7.7067	0.94066	5.7034
-2.6171	3.4619	11.04	3.8966	11.341	1.9931	7.7494	0.94683	5.7063
-2.6167	3.4417	10.96	3.8855	11.339	2.0143	7.7896	0.95318	5.7091
-2.6163	3.4214	10.883	3.8744	11.339	2.0351	7.8275	0.95972	5.7119
-2.6159	3.401	10.807	3.8636	11.339	2.0556	7.8629	0.96644	5.7148
-2.6155	3.3805	10.734	3.853	11.34	2.0757	7.8958	0.97338	5.7181
-2.6151	3.3599	10.663	3.8425	11.343	2.0955	7.9263	0.98053	5.7218
-2.6147	3.3394	10.595	3.8323	11.347	2.115	7.9545	0.98792	5.7262
-2.6143	3.3187	10.529	3.8223	11.352	2.1341	7.9802	0.99556	5.7313
-2.6139	3.298	10.467	3.8235	11.355	2.1529	8.0036	0.99598	5.7426
-2.6135	3.2774	10.407	3.8148	11.362	2.1712	8.0247	1.0046	5.7496
-2.6131	3.2567	10.35	3.8063	11.37	2.1892	8.0435	1.0135	5.7578
-2.6127	3.236	10.296	3.7982	11.38	2.2068	8.06	1.0226	5.7675
-2.6123	3.2153	10.245	3.8016	11.401	2.224	8.0744	1.032	5.7788
-2.6119	3.1946	10.197	3.7949	11.413	2.2408	8.0867	1.0418	5.792
-2.6115	3.174	10.152	3.7886	11.427	2.2572	8.0968	1.0518	5.8073
-2.6111	3.1533	10.11	3.7828	11.442	2.2732	8.105	1.0622	5.8247
-2.6107	3.1328	10.072	3.7774	11.459	2.2887	8.1113	1.073	5.8446
-2.6103	3.1123	10.036	3.7725	11.477	2.3039	8.1157	1.0841	5.8672
-2.6099	3.0918	10.003	3.7681	11.495	2.3186	8.1184	1.0956	5.8925
-2.6095	3.0714	9.9734	3.7642	11.516	2.3329	8.1194	1.1074	5.9208
-2.6091	3.0563	9.9601	3.7607	11.537	2.3467	8.1188	1.1197	5.9522
-2.6087	3.0363	9.9366	3.7477	11.515	2.3601	8.1168	1.1323	5.9871
-2.6083	3.0117	9.921	3.7459	11.542	2.3731	8.1133	1.1454	6.0254
-2.6079	2.9922	9.9025	3.7447	11.569	2.3856	8.1086	1.159	6.0674
-2.6075	2.9729	9.8865	3.7439	11.598	2.3977	8.1027	1.1729	6.1133
-2.6071	2.9536	9.8727	3.7437	11.627	2.4093	8.0957	1.1874	6.1632
-2.6067	2.9345	9.8612	3.7337	11.613	2.4205	8.0878	1.2023	6.2172
-2.6063	2.9155	9.8517	3.7352	11.647	2.4312	8.0791	1.2176	6.2755
-2.6059	2.8966	9.8441	3.7372	11.682	2.4415	8.0696	1.2335	6.3382
-2.6055	2.8778	9.8383	3.7397	11.718	2.4513	8.0596	1.2498	6.4054
-2.6051	2.8591	9.834	3.7427	11.755	2.4606	8.049	1.2667	6.4772
-2.6047	2.8406	9.8311	3.7572	11.797	2.4695	8.0381	1.284	6.5536
-2.6043	2.8222	9.8295	3.762	11.836	2.4779	8.027	1.3019	6.6348
-2.6039	2.8645	9.8229	3.7674	11.875	2.4858	8.0157	1.3202	6.7208
-2.6035	2.8501	9.8229	3.7733	11.915	2.4933	8.0044	1.3391	6.8117
-2.6031	2.8361	9.8235	3.7799	11.955	2.5188	8.032	1.3585	6.9075
-2.6027	2.8224	9.8246	3.7871	11.996	2.5265	8.0248	1.3785	7.0081
-2.6023	2.8091	9.8261	3.7948	12.038	2.5338	8.0182	1.399	7.1137
-2.6019	2.7962	9.8277	3.8032	12.08	2.5406	8.0124	1.42	7.2242
-2.6015	2.7792	9.8293	3.8122	12.123	2.5471	8.0075	1.4415	7.3395
-2.6011	2.7582	9.8308	3.8217	12.166	2.5532	8.0035	1.4636	7.4597
-2.6007	2.7375	9.8319	3.8319	12.209	2.5589	8.0006	1.4862	7.5848
-2.6003	2.7173	9.8325	3.8426	12.253	2.5641	7.9989	1.5093	7.7146
-2.5999	2.6974	9.8325	3.854	12.297	2.5875	8.049	1.5329	7.8491
-2.5995	2.6779	9.8316	3.8659	12.342	2.5932	8.0545	1.5571	7.9882
-2.5991	2.6017	9.8351	3.8784	12.387	2.5985	8.0617	1.5818	8.1319
-2.5987	2.5863	9.8319	3.8914	12.432	2.6035	8.0708	1.607	8.2801
-2.5983	2.571	9.8276	3.9051	12.477	2.6082	8.0818	1.6327	8.4326
-2.5979	2.556	9.8221	3.9193	12.522	2.6125	8.0948	1.6589	8.5894
-2.5975	2.5411	9.8151	3.934	12.567	2.6166	8.1099	1.6855	8.7504
-2.5971	2.5263	9.8067	3.9493	12.612	2.6204	8.127	1.7126	8.9154
-2.5967	2.5118	9.7967	3.9651	12.657	2.6239	8.1464	1.7402	9.0843
-2.5963	2.4974	9.785	3.9814	12.702	2.6272	8.1678	1.7683	9.257
-2.5959	2.4833	9.7716	4.0091	12.795	2.6301	8.1915	1.7968	9.4334
-2.5955	2.4693	9.7564	4.0271	12.843	2.6328	8.2174	1.8257	9.6133
-2.5951	2.4506	9.7445	4.0565	12.9	2.6353	8.2456	1.855	9.7965
-2.5947	2.4373	9.7252	4.0762	12.947	2.6375	8.2759	1.8846	9.983
-2.5943	2.4241	9.704	4.0963	12.995	2.6395	8.3084	1.9147	10.173
-2.5939	2.4111	9.6809	4.1171	13.042	2.6412	8.3432	1.9451	10.365
-2.5935	2.3984	9.6557	4.1383	13.089	2.6428	8.38	1.9759	10.56
-2.5931	2.3857	9.6286	4.16	13.136	2.6441	8.419	2.0069	10.758
-2.5927	2.3733	9.5995	4.1821	13.183	2.6452	8.46	2.0383	10.958
-2.5923	2.3611	9.5684	4.2048	13.228	2.6462	8.5031	2.0699	11.161
-2.5919	2.349	9.5353	4.2174	13.228	2.6469	8.5481	2.1018	11.366
-2.5915	2.3372	9.5003	4.2416	13.276	2.6475	8.595	2.1339	11.572
-2.5911	2.3255	9.4633	4.2661	13.323	2.6479	8.6438	2.1662	11.78
-2.5907	2.309	9.4248	4.291	13.369	2.6482	8.6943	2.1986	11.99
-2.5903	2.298	9.3841	4.3162	13.414	2.6484	8.7466	2.2312	12.201
-2.5899	2.2872	9.3417	4.3418	13.459	2.6484	8.8005	2.264	12.414
-2.5895	2.2766	9.2975	4.3678	13.503	2.6483	8.8559	2.2968	12.627
-2.5891	2.2661	9.2515	4.394	13.546	2.6481	8.9128	2.3297	12.841
-2.5887	2.2559	9.2039	4.4206	13.588	2.6478	8.9711	2.3626	13.056
-2.5883	2.2458	9.1548	4.4474	13.629	2.6474	9.0307	2.3956	13.271
-2.5879	2.2359	9.1042	4.4855	13.716	2.6469	9.0916	2.4285	13.487
-2.5875	2.2262	9.0522	4.5135	13.758	2.6464	9.1537	2.4614	13.702
-2.5871	2.2167	8.9989	4.5419	13.799	2.6458	9.2169	2.4941	13.918
-2.5867	2.2073	8.9445	4.5705	13.84	2.6452	9.2811	2.5268	14.133
-2.5863	2.1982	8.8889	4.5994	13.879	2.6446	9.3463	2.5593	14.347
-2.5859	2.1893	8.8324	4.6395	13.921	2.644	9.4123	2.5917	14.561
-2.5855	2.1805	8.775	4.6695	13.959	2.6434	9.4793	2.6238	14.773
-2.5851	2.172	8.7168	4.6998	13.997	2.6428	9.5469	2.6557	14.985
-2.5847	2.1636	8.6581	4.7303	14.033	2.6422	9.6154	2.6873	15.195
-2.5843	2.1507	8.6036	4.772	14.065	2.6416	9.6844	2.7187	15.403
-2.5839	2.143	8.5437	4.8036	14.099	2.6412	9.7541	2.7497	15.61
-2.5835	2.1355	8.4835	4.8354	14.133	2.6407	9.8244	2.7803	15.815
-2.5831	2.1281	8.4232	4.8675	14.166	2.6589	9.9036	2.8105	16.018
-2.5827	2.121	8.3629	4.8999	14.198	2.6598	9.9744	2.8402	16.218
-2.5823	2.114	8.3028	4.9324	14.229	2.6609	10.046	2.8695	16.416
-2.5819	2.1072	8.2429	4.9651	14.26	2.6622	10.117	2.8984	16.61
-2.5815	2.1006	8.1834	4.9981	14.289	2.6637	10.189	2.9266	16.802
-2.5811	2.0941	8.1243	5.0312	14.319	2.6654	10.262	2.9543	16.991
-2.5807	2.0878	8.066	5.0645	14.347	2.6673	10.334	2.9814	17.177
-2.5803	2.0817	8.0083	5.098	14.375	2.6695	10.407	3.0079	17.359
-2.5799	2.0758	7.9516	5.1316	14.402	2.672	10.48	3.0338	17.537
-2.5795	2.0701	7.8958	5.1654	14.428	2.6747	10.554	3.0589	17.711
-2.5791	2.0645	7.8412	5.1993	14.454	2.6778	10.627	3.0913	17.896
-2.5787	2.059	7.7877	5.2334	14.479	2.6812	10.701	3.1155	18.063
-2.5783	2.0538	7.7355	5.2676	14.504	2.6849	10.776	3.1389	18.225
-2.5779	2.0537	7.6932	5.302	14.529	2.689	10.85	3.1616	18.383
-2.5775	2.0491	7.6447	5.3475	14.599	2.6934	10.925	3.1834	18.536
-2.5771	2.0446	7.5978	5.3828	14.626	2.6983	11	3.2045	18.684
-2.5767	2.0403	7.5526	5.4182	14.652	2.7035	11.076	3.2247	18.827
-2.5763	2.0361	7.5092	5.4537	14.678	2.7092	11.151	3.244	18.965
-2.5759	2.0321	7.4677	5.4894	14.704	2.7153	11.228	3.2625	19.097
-2.5755	2.0283	7.4281	5.5148	14.735	2.7218	11.304	3.28	19.224
-2.5751	2.0246	7.3904	5.5513	14.761	2.7288	11.381	3.2966	19.346
-2.5747	2.0161	7.3598	5.588	14.787	2.7363	11.458	3.3123	19.461
-2.5743	2.013	7.326	5.6247	14.813	2.7443	11.536	3.3351	19.565
-2.5739	2.005	7.2719	5.6615	14.84	2.7528	11.614	3.3493	19.668
-2.5735	2.0024	7.2434	5.709	14.864	2.7618	11.693	3.3626	19.766
-2.5731	2.005	7.2214	5.7467	14.891	2.7713	11.772	3.3748	19.856
-2.5727	2.0079	7.192	5.7844	14.918	2.7814	11.852	3.3861	19.941
-2.5723	2.0062	7.1701	5.8328	14.942	2.7921	11.932	3.3964	20.019
-2.5719	2.0046	7.1504	5.8715	14.97	2.8033	12.012	3.4056	20.091
-2.5715	1.9983	7.1383	5.9102	14.999	2.815	12.094	3.4138	20.156
-2.5711	1.9972	7.1225	5.9492	15.028	2.8274	12.176	3.421	20.214
-2.5707	1.9962	7.1087	5.978	15.045	2.8403	12.258	3.4272	20.266
-2.5703	2.0003	7.0912	6.0178	15.076	2.8539	12.341	3.4323	20.311
-2.5699	1.9998	7.0811	6.0577	15.108	2.868	12.425	3.4364	20.349
-2.5695	2.0044	7.0672	6.0978	15.14	2.8827	12.51	3.4394	20.38
-2.5691	2.0095	7.0691	6.1379	15.174	2.8981	12.595	3.4414	20.404
-2.5687	2.0098	7.0653	6.1782	15.208	2.9141	12.681	3.4423	20.421
-2.5683	2.0154	7.0817	6.2186	15.243	2.9307	12.767	3.4423	20.432
-2.5679	2.0163	7.082	6.2591	15.278	2.9479	12.854	3.4411	20.435
-2.5675	2.0125	7.0897	6.2998	15.315	2.9657	12.942	3.439	20.431
-2.5671	2.0139	7.0931	6.3406	15.352	2.9842	13.031	3.4358	20.42
-2.5667	2.0105	7.0745	6.3814	15.391	3.0033	13.12	3.4317	20.402
-2.5663	2.0177	7.0764	6.4224	15.43	3.023	13.209	3.4265	20.377
-2.5659	2.0201	7.0854	6.4636	15.47	3.0433	13.3	3.4203	20.346
-2.5655	2.0226	7.0958	6.5048	15.512	3.0642	13.391	3.4132	20.307
-2.5651	2.0252	7.1075	6.5681	15.544	3.0857	13.482	3.405	20.261
-2.5647	2.0279	7.1204	6.6009	15.549	3.1078	13.574	3.396	20.209
-2.5643	2.0307	7.1344	6.6445	15.594	3.1305	13.667	3.386	20.149
-2.5639	2.0387	7.1448	6.6988	15.636	3.1538	13.76	3.3751	20.083
-2.5635	2.0471	7.1554	6.7433	15.683	3.1776	13.853	3.3632	20.011
-2.5631	2.0561	7.1871	6.788	15.731	3.202	13.947	3.3505	19.931
-2.5627	2.0603	7.206	6.8329	15.779	3.2269	14.041	3.3294	19.836
-2.5623	2.0699	7.221	6.8889	15.823	3.2524	14.135	3.3154	19.744
-2.5619	2.1373	7.2354	6.9348	15.873	3.2783	14.229	3.3006	19.646
-2.5615	2.1462	7.2565	6.9921	15.917	3.3048	14.324	3.285	19.542
-2.5611	2.1557	7.2784	7.0499	15.962	3.3317	14.419	3.2686	19.431
-2.5607	2.2279	7.295	7.0979	16.012	3.3591	14.513	3.2515	19.315
-2.5603	2.2421	7.3181	7.1461	16.063	3.3869	14.608	3.2336	19.193
-2.5599	2.2569	7.342	7.1947	16.114	3.4151	14.702	3.215	19.064
-2.5595	2.2724	7.3665	7.2436	16.165	3.4437	14.796	3.1957	18.931
-2.5591	2.2937	7.3883	7.2928	16.217	3.4727	14.89	3.1758	18.791
-2.5587	2.3215	7.4336	7.3423	16.268	3.502	14.983	3.1552	18.647
-2.5583	2.3454	7.4555	7.3921	16.32	3.5317	15.075	3.1341	18.497
-2.5579	2.3653	7.484	7.4423	16.372	3.5616	15.167	3.1124	18.342
-2.5575	2.3862	7.5132	7.4927	16.424	3.5917	15.259	3.0901	18.182
-2.5571	2.408	7.5432	7.5435	16.476	3.6221	15.349	3.0674	18.018
-2.5567	2.426	7.5502	7.6054	16.567	3.6528	15.438	3.0442	17.849
-2.5563	2.4501	7.583	7.6575	16.621	3.6835	15.526	3.0206	17.675
-2.5559	2.4753	7.6165	7.7099	16.675	3.7144	15.614	2.9965	17.498
-2.5555	2.5016	7.6507	7.7626	16.729	3.7454	15.699	2.9721	17.316
-2.5551	2.5341	7.7097	7.8263	16.778	3.7765	15.784	2.9474	17.131
-2.5547	2.563	7.7475	7.8804	16.831	3.8076	15.866	2.9224	16.941
-2.5543	2.5932	7.7863	7.9349	16.884	3.8388	15.948	2.897	16.749
-2.5539	2.6246	7.8262	7.9897	16.937	3.8698	16.027	2.8715	16.553
-2.5535	2.6574	7.8672	8.045	16.989	3.9009	16.104	2.8457	16.354
-2.5531	2.6915	7.9094	8.1006	17.04	3.9318	16.18	2.8198	16.153
-2.5527	2.7271	7.9527	8.1566	17.092	3.9626	16.253	2.7937	15.948
-2.5523	2.7693	8.024	8.213	17.142	3.9932	16.324	2.7675	15.742
-2.5519	2.8176	8.0663	8.2698	17.192	4.0053	16.395	2.7413	15.533
-2.5515	2.8595	8.1155	8.3269	17.241	4.0365	16.46	2.715	15.322
-2.5511	2.9032	8.1661	8.3844	17.29	4.0673	16.524	2.6887	15.109
-2.5507	2.9539	8.2307	8.4423	17.338	4.0978	16.584	2.6623	14.895
-2.5503	3.0016	8.285	8.5006	17.385	4.1279	16.641	2.6361	14.68
-2.5499	3.0513	8.341	8.5593	17.431	4.1575	16.696	2.6099	14.463
-2.5495	3.0788	8.3988	8.6183	17.476	4.1866	16.748	2.5838	14.246
-2.5491	3.1147	8.4586	8.6776	17.521	4.2152	16.796	2.5659	14.085
-2.5487	3.169	8.5203	8.7373	17.564	4.2432	16.842	2.5405	13.87
-2.5483	3.2255	8.5841	8.7974	17.606	4.2706	16.884	2.5154	13.655
-2.5479	3.2842	8.65	8.8687	17.646	4.2974	16.922	2.4906	13.44
-2.5475	3.3502	8.7485	8.9302	17.686	4.3236	16.957	2.4659	13.226
-2.5471	3.4139	8.821	8.992	17.725	4.349	16.989	2.4416	13.012
-2.5467	3.4801	8.8961	9.0541	17.764	4.3737	17.016	2.4176	12.799
-2.5463	3.5487	8.9736	9.1168	17.801	4.3977	17.04	2.3939	12.588
-2.5459	3.6199	9.0539	9.1809	17.841	4.4208	17.061	2.3706	12.378
-2.5455	3.6938	9.1368	9.2454	17.88	4.4431	17.077	2.3476	12.169
-2.5451	3.7704	9.2226	9.3103	17.918	4.4646	17.089	2.325	11.963
-2.5447	3.8498	9.3113	9.3754	17.955	4.4851	17.097	2.3029	11.758
-2.5443	3.932	9.4029	9.4409	17.99	4.5048	17.102	2.2812	11.556
-2.5439	4.0172	9.4975	9.5068	18.025	4.5235	17.102	2.2599	11.357
-2.5435	4.1053	9.5952	9.573	18.058	4.5412	17.098	2.2391	11.16
-2.5431	4.1964	9.6962	9.6395	18.09	4.5579	17.089	2.2188	10.967
-2.5427	4.2906	9.8003	9.7063	18.121	4.5736	17.077	2.199	10.777
-2.5423	4.3848	9.9078	9.7734	18.151	4.5882	17.06	2.1796	10.591
-2.5419	4.4813	10.019	9.8408	18.18	4.6017	17.039	2.1608	10.408
-2.5415	4.5807	10.133	9.9191	18.204	4.6141	17.014	2.1426	10.229
-2.5411	4.6831	10.251	9.9877	18.231	4.6254	16.984	2.1249	10.055
-2.5407	4.7885	10.372	10.057	18.256	4.6355	16.951	2.1077	9.8852
-2.5403	4.8969	10.497	10.126	18.281	4.6445	16.913	2.0911	9.72
-2.5399	5.0083	10.625	10.195	18.305	4.6523	16.87	2.075	9.5597
-2.5395	5.1229	10.757	10.265	18.328	4.6589	16.824	2.0595	9.4044
-2.5391	5.2458	10.901	10.335	18.35	4.6642	16.773	2.0446	9.2543
-2.5387	5.3669	11.041	10.405	18.371	4.6684	16.718	2.0302	9.1096
-2.5383	5.4912	11.185	10.476	18.392	4.6712	16.659	2.0164	8.9704
-2.5379	5.6187	11.333	10.547	18.411	4.6729	16.596	2.0032	8.8369
-2.5375	5.7443	11.492	10.618	18.43	4.6732	16.529	1.9906	8.7093
-2.5371	5.8785	11.647	10.689	18.449	4.6723	16.458	1.9785	8.5875
-2.5367	6.0159	11.806	10.76	18.467	4.6701	16.383	1.967	8.4718
-2.5363	6.1564	11.968	10.832	18.484	4.6666	16.304	1.9561	8.3621
-2.5359	6.3002	12.135	10.903	18.5	4.6618	16.222	1.9457	8.2585
-2.5355	6.4421	12.305	10.975	18.517	4.6557	16.135	1.9359	8.1611
-2.5351	6.5926	12.479	11.047	18.533	4.6483	16.045	1.9267	8.0699
-2.5347	6.7413	12.657	11.119	18.548	4.6396	15.952	1.918	7.9848
-2.5343	6.8983	12.839	11.191	18.563	4.6296	15.855	1.9098	7.9058
-2.5339	7.0584	13.024	11.263	18.578	4.6183	15.755	1.9021	7.8329
-2.5335	7.2216	13.213	11.335	18.593	4.6057	15.651	1.9031	7.7981
-2.5331	7.3878	13.406	11.407	18.608	4.5918	15.544	1.897	7.7396
-2.5327	7.5571	13.602	11.479	18.622	4.5767	15.434	1.8914	7.687
-2.5323	7.7293	13.802	11.562	18.659	4.5603	15.322	1.8863	7.6401
-2.5319	7.8079	14.005	11.635	18.675	4.5426	15.206	1.8816	7.5988
-2.5315	7.8893	14.211	11.708	18.691	4.5236	15.087	1.8775	7.5629
-2.5311	7.9737	14.421	11.78	18.707	4.5035	14.966	1.8738	7.5322
-2.5307	8.0235	14.634	11.863	18.72	4.482	14.843	1.8706	7.5065
-2.5303	8.0584	14.85	11.936	18.737	4.4594	14.717	1.8679	7.4856
-2.5299	8.0971	15.069	12.02	18.747	4.4356	14.588	1.8655	7.4692
-2.5295	8.1393	15.29	12.093	18.763	4.4106	14.458	1.8636	7.4571
-2.5291	8.1852	15.515	12.166	18.781	4.3845	14.325	1.8621	7.4491
-2.5287	8.2346	15.742	12.239	18.799	4.3572	14.19	1.861	7.4448
-2.5283	8.2876	15.972	12.311	18.817	4.3288	14.054	1.8602	7.444
-2.5279	8.3441	16.204	12.384	18.836	4.2993	13.915	1.8598	7.4465
-2.5275	8.4039	16.438	12.456	18.856	4.2687	13.775	1.8597	7.4519
-2.5271	8.4672	16.675	12.527	18.876	4.3111	13.606	1.86	7.4601
-2.5267	8.5338	16.913	12.599	18.897	4.283	13.462	1.8605	7.4707
-2.5263	8.6036	17.153	12.67	18.918	4.2541	13.316	1.8614	7.4836
-2.5259	8.6766	17.395	12.74	18.941	4.2246	13.168	1.8625	7.4984
-2.5255	8.7527	17.639	12.81	18.964	4.1943	13.02	1.8638	7.5149
-2.5251	8.8318	17.884	12.88	18.988	4.1634	12.87	1.8655	7.5329
-2.5247	8.9138	18.13	12.949	19.013	4.1319	12.719	1.8673	7.5521
-2.5243	8.9987	18.377	13.018	19.038	4.0999	12.567	1.8693	7.5724
-2.5239	9.0863	18.625	13.085	19.065	4.0673	12.415	1.8715	7.5935
-2.5235	9.1766	18.873	13.153	19.092	4.0343	12.261	1.8739	7.6152
-2.5231	9.2694	19.122	13.219	19.12	4.0008	12.107	1.8765	7.6374
-2.5227	9.3647	19.372	13.275	19.116	3.967	11.953	1.8792	7.6598
-2.5223	9.4624	19.621	13.341	19.148	3.9154	11.735	1.882	7.6824
-2.5219	9.5623	19.871	13.406	19.181	3.8819	11.584	1.8849	7.7049
-2.5215	9.6643	20.12	13.48	19.248	3.8482	11.432	1.8879	7.7272
-2.5211	9.7683	20.369	13.544	19.283	3.8142	11.28	1.891	7.7492
-2.5207	9.8742	20.617	13.607	19.32	3.78	11.127	1.8942	7.7707
-2.5203	9.9818	20.864	13.669	19.357	3.7457	10.974	1.8974	7.7917
-2.5199	10.091	21.11	13.729	19.394	3.7113	10.82	1.9006	7.812
-2.5195	10.202	21.355	13.789	19.433	3.6769	10.667	1.9039	7.8316
-2.5191	10.314	21.598	13.838	19.471	3.6425	10.513	1.9072	7.8504
-2.5187	10.427	21.839	13.896	19.51	3.6081	10.359	1.9105	7.8682
-2.5183	10.542	22.079	13.953	19.55	3.5739	10.205	1.9137	7.8851
-2.5179	10.657	22.317	14.009	19.59	3.5399	10.051	1.917	7.901
-2.5175	10.774	22.552	14.053	19.6	3.5061	9.8978	1.9202	7.9158
-2.5171	10.891	22.785	14.107	19.642	3.4725	9.7442	1.9157	7.9129
-2.5167	11.008	23.015	14.16	19.685	3.4393	9.5909	1.9192	7.9265
-2.5163	11.126	23.242	14.222	19.719	3.4065	9.4378	1.9227	7.9388
-2.5159	11.244	23.466	14.272	19.761	3.3742	9.285	1.926	7.9499
-2.5155	11.363	23.687	14.321	19.802	3.3423	9.1326	1.9293	7.9598
-2.5151	11.481	23.904	14.368	19.843	3.311	8.9806	1.9325	7.9684
-2.5147	11.599	24.117	14.414	19.884	3.2803	8.8291	1.9355	7.9759
-2.5143	11.717	24.327	14.458	19.924	3.2502	8.6781	1.9384	7.9821
-2.5139	11.834	24.532	14.501	19.964	3.2209	8.5276	1.9337	7.9504
-2.5135	11.951	24.733	14.542	20.002	3.1923	8.3777	1.9367	7.9565
-2.5131	12.067	24.929	14.582	20.04	3.1645	8.2285	1.9397	7.9614
-2.5127	12.182	25.121	14.62	20.077	3.1376	8.0799	1.9424	7.9651
-2.5123	12.296	25.308	14.656	20.113	3.1115	7.9321	1.9449	7.9676
-2.5119	12.408	25.489	14.69	20.148	3.0865	7.785	1.9473	7.9691
-2.5115	12.525	25.658	14.723	20.182	3.0624	7.6388	1.9495	7.9694
-2.5111	12.635	25.828	14.754	20.214	3.0394	7.4935	1.9516	7.9688
-2.5107	12.744	25.993	14.783	20.245	3.0175	7.3491	1.9459	7.9488
-2.5103	12.851	26.152	14.811	20.274	2.9967	7.2057	1.948	7.9471
-2.5099	12.961	26.313	14.836	20.302	2.9771	7.0633	1.9499	7.9445
-2.5095	13.064	26.46	14.86	20.327	2.9588	6.9221	1.9516	7.9411
-2.5091	13.165	26.601	14.881	20.351	2.9417	6.782	1.9531	7.937
-2.5087	13.264	26.735	14.901	20.373	2.9259	6.6432	1.9543	7.9322
-2.5083	13.366	26.882	14.919	20.393	2.9115	6.5058	1.9554	7.9268
-2.5079	13.46	27.004	14.946	20.418	2.8985	6.3697	1.9562	7.9209
-2.5075	13.552	27.119	14.96	20.434	2.8869	6.2352	1.9569	7.9144
-2.5071	13.585	27.23	14.984	20.439	2.8767	6.1022	1.9574	7.9075
-2.5067	13.686	27.332	14.995	20.45	2.8681	5.971	1.9576	7.9002
-2.5063	13.784	27.426	15.005	20.458	2.861	5.8415	1.9577	7.8926
-2.5059	13.879	27.513	15.012	20.464	2.8554	5.714	1.9575	7.8848
-2.5055	13.971	27.593	15.018	20.467	2.8515	5.5886	1.9572	7.8767
-2.5051	14.059	27.666	15.022	20.467	2.8491	5.4653	1.9566	7.8685
-2.5047	14.144	27.731	15.023	20.465	2.8484	5.3444	1.9559	7.8602
-2.5043	14.225	27.788	15.023	20.46	2.8494	5.2259	1.955	7.8518
-2.5039	14.303	27.838	15.021	20.451	2.8521	5.1101	1.9539	7.8435
-2.5035	14.377	27.88	15.017	20.44	2.8564	4.9972	1.9526	7.8352
-2.5031	14.448	27.915	15.01	20.426	2.8625	4.8872	1.9512	7.8269
-2.5027	14.514	27.941	15.002	20.408	2.8704	4.7805	1.9418	7.7922
-2.5023	14.572	27.968	14.992	20.388	2.88	4.6773	1.9405	7.7854
-2.5019	14.632	27.978	14.981	20.364	2.8914	4.5777	1.9389	7.7787
-2.5015	14.687	27.981	14.967	20.338	2.9045	4.4819	1.9372	7.7721
-2.5011	14.739	27.976	14.951	20.308	2.9195	4.3904	1.9352	7.7658
-2.5007	14.787	27.963	14.933	20.275	2.9362	4.3032	1.9331	7.7596
-2.5003	14.831	27.943	14.925	20.249	2.9047	4.2206	1.9308	7.7537
-2.4999	14.871	27.914	14.904	20.21	2.9114	4.1064	1.9283	7.748
-2.4995	14.887	27.878	14.882	20.168	2.8478	4.0315	1.9256	7.7426
-2.4991	14.839	27.834	14.857	20.123	2.787	3.962	1.9151	7.7078
-2.4987	14.788	27.782	14.831	20.075	2.7288	3.8981	1.9126	7.7042
-2.4983	14.733	27.722	14.804	20.024	2.6732	3.84	1.9098	7.7008
-2.4979	14.675	27.655	14.764	19.944	2.6203	3.788	1.9068	7.6975
-2.4975	14.612	27.58	14.733	19.888	2.5699	3.7423	1.9036	7.6945
-2.4971	14.547	27.497	14.712	19.823	2.5222	3.703	1.9003	7.6915
-2.4967	14.478	27.407	14.679	19.761	2.4771	3.6704	1.8968	7.6888
-2.4963	14.405	27.31	14.644	19.696	2.4345	3.6446	1.893	7.6861
-2.4959	14.33	27.205	14.608	19.628	2.3944	3.6257	1.8891	7.6835
-2.4955	14.251	27.094	14.57	19.558	2.3569	3.6137	1.8851	7.6811
-2.4951	14.169	26.975	14.53	19.484	2.3218	3.6086	1.8808	7.6786
-2.4947	14.085	26.848	14.489	19.408	2.2893	3.6105	1.8764	7.6762
-2.4943	13.998	26.716	14.447	19.33	2.2591	3.6191	1.8718	7.6737
-2.4939	13.908	26.576	14.393	19.257	2.2314	3.6345	1.867	7.6712
-2.4935	13.816	26.429	14.349	19.173	2.2061	3.6564	1.862	7.6686
-2.4931	13.722	26.276	14.303	19.087	2.1831	3.6846	1.8569	7.6659
-2.4927	13.626	26.117	14.256	18.998	2.1625	3.719	1.8516	7.663
-2.4923	13.527	25.951	14.198	18.906	2.1442	3.7592	1.8461	7.6599
-2.4919	13.427	25.78	14.149	18.814	2.1282	3.8049	1.8405	7.6565
-2.4915	13.325	25.602	14.099	18.719	2.1144	3.8559	1.8347	7.6529
-2.4911	13.221	25.419	14.048	18.624	2.1029	3.9119	1.8287	7.649
-2.4907	13.116	25.23	13.996	18.526	2.0936	3.9724	1.8225	7.6447
-2.4903	13.009	25.035	13.942	18.427	2.0864	4.0373	1.8162	7.64
-2.4899	12.901	24.835	13.888	18.327	2.0814	4.1062	1.8097	7.6349
-2.4895	12.793	24.63	13.833	18.225	2.0785	4.1786	1.803	7.6292
-2.4891	12.678	24.416	13.776	18.123	2.0777	4.2545	1.7962	7.6231
-2.4887	12.568	24.202	13.719	18.019	2.0789	4.3333	1.7891	7.6164
-2.4883	12.462	23.975	13.661	17.915	2.0822	4.4149	1.7819	7.6091
-2.4879	12.351	23.752	13.603	17.81	2.0874	4.4989	1.7745	7.6012
-2.4875	12.245	23.533	13.543	17.704	2.0947	4.5851	1.7669	7.5925
-2.4871	12.134	23.302	13.483	17.598	2.1039	4.6731	1.7592	7.5832
-2.4867	12.022	23.067	13.433	17.484	2.1149	4.7628	1.7512	7.5732
-2.4863	11.916	22.865	13.372	17.377	2.1279	4.8539	1.7431	7.5623
-2.4859	11.805	22.625	13.311	17.27	2.1428	4.9462	1.7347	7.5506
-2.4855	11.695	22.383	13.25	17.163	2.1594	5.0393	1.7262	7.5381
-2.4851	11.585	22.137	13.187	17.057	2.1779	5.1332	1.7175	7.5247
-2.4847	11.475	21.89	13.115	16.947	2.1981	5.2277	1.7086	7.5104
-2.4843	11.366	21.639	13.052	16.842	2.2201	5.3225	1.6995	7.4952
-2.4839	11.258	21.387	12.99	16.737	2.2438	5.4174	1.6903	7.479
-2.4835	11.146	21.101	12.927	16.633	2.2691	5.5123	1.6808	7.4618
-2.4831	11.04	20.847	12.864	16.53	2.2962	5.607	1.6711	7.4436
-2.4827	10.935	20.592	12.8	16.428	2.2551	5.7225	1.6612	7.4244
-2.4823	10.832	20.336	12.737	16.327	2.2894	5.8152	1.6511	7.4041
-2.4819	10.73	20.078	12.673	16.228	2.3252	5.9074	1.6409	7.3827
-2.4815	10.629	19.82	12.609	16.13	2.3441	5.9988	1.6304	7.3602
-2.4811	10.529	19.561	12.545	16.034	2.334	6.0894	1.6277	7.3804
-2.4807	10.432	19.302	12.481	15.94	2.3253	6.179	1.6173	7.3586
-2.4803	10.336	19.042	12.418	15.847	2.3177	6.2676	1.6067	7.3358
-2.4799	10.241	18.783	12.354	15.756	2.3114	6.355	1.596	7.3121
-2.4795	10.149	18.525	12.29	15.668	2.2364	6.4634	1.5851	7.2874
-2.4791	10.058	18.267	12.226	15.581	2.2364	6.5468	1.574	7.2617
-2.4787	9.9694	18.009	12.162	15.497	2.2372	6.6287	1.5628	7.2351
-2.4783	9.8827	17.753	12.099	15.415	2.2388	6.7091	1.5514	7.2074
-2.4779	9.7981	17.498	12.036	15.336	2.2412	6.7879	1.5398	7.1788
-2.4775	9.7156	17.245	11.973	15.259	2.2443	6.865	1.528	7.1492
-2.4771	9.6352	16.994	11.91	15.184	2.2481	6.9404	1.5242	7.1201
-2.4767	9.4857	16.744	11.847	15.113	2.2526	7.0139	1.5127	7.0884
-2.4763	9.2957	16.497	11.785	15.044	2.2577	7.0855	1.501	7.0558
-2.4759	9.1081	16.251	11.712	14.952	2.2634	7.1551	1.4892	7.0223
-2.4755	8.9229	16.009	11.651	14.891	2.2697	7.2227	1.4773	6.9879
-2.4751	8.7454	15.772	11.58	14.839	2.2764	7.2882	1.4653	6.9525
-2.4747	8.5657	15.535	11.52	14.783	2.2837	7.3516	1.4532	6.9162
-2.4743	8.3886	15.302	11.46	14.73	2.2915	7.4128	1.441	6.8791
-2.4739	8.2143	15.072	11.401	14.679	2.2996	7.4718	1.4287	6.8411
-2.4735	8.0429	14.845	11.342	14.632	2.3082	7.5285	1.4163	6.8023
-2.4731	7.8795	14.623	11.294	14.594	2.3171	7.5831	1.4039	6.7626
-2.4727	7.7142	14.404	11.236	14.553	2.3263	7.6353	1.3913	6.7222
-2.4723	7.5569	14.215	11.179	14.515	2.3359	7.6852	1.3788	6.6811
-2.4719	7.398	14.006	11.122	14.481	2.3457	7.7329	1.3662	6.6392
-2.4715	7.2422	13.802	11.065	14.449	2.3557	7.7782	1.3535	6.5966
-2.4711	7.0896	13.602	11.009	14.421	2.366	7.8212	1.3408	6.5533
-2.4707	6.9401	13.406	10.953	14.396	2.3764	7.862	1.3281	6.5094
-2.4703	6.7939	13.215	10.898	14.373	2.387	7.9004	1.3154	6.465
-2.4699	6.6508	13.029	10.843	14.354	2.3977	7.9366	1.3026	6.4199
-2.4695	6.5111	12.849	10.799	14.363	2.4273	7.984	1.2899	6.3744
-2.4691	6.3746	12.673	10.746	14.35	2.4393	8.0176	1.2772	6.3284
-2.4687	6.2414	12.502	10.693	14.341	2.4514	8.0491	1.2645	6.2819
-2.4683	6.132	12.337	10.64	14.335	2.4635	8.0787	1.2519	6.2351
-2.4679	6.0602	12.176	10.578	14.309	2.4758	8.1064	1.2393	6.1879
-2.4675	5.9917	12.021	10.527	14.31	2.488	8.1323	1.2267	6.1404
-2.4671	5.9315	11.864	10.476	14.313	2.5003	8.1565	1.2143	6.0926
-2.4667	5.87	11.719	10.426	14.319	2.5126	8.179	1.2019	6.0447
-2.4663	5.8118	11.58	10.376	14.328	2.5442	8.2233	1.1896	5.9966
-2.4659	5.7571	11.445	10.317	14.332	2.5576	8.2454	1.1774	5.9484
-2.4655	5.7057	11.316	10.268	14.345	2.571	8.2664	1.1653	5.9002
-2.4651	5.6577	11.192	10.22	14.361	2.5843	8.2864	1.1534	5.8519
-2.4647	5.6043	11.073	10.172	14.379	2.5977	8.3054	1.1416	5.8038
-2.4643	5.4925	10.959	10.115	14.405	2.611	8.3238	1.13	5.7558
-2.4639	5.3841	10.85	10.069	14.426	2.6242	8.3415	1.1185	5.7079
-2.4635	5.279	10.746	10.022	14.449	2.6374	8.3587	1.1072	5.6603
-2.4631	5.1772	10.647	9.9767	14.473	2.6505	8.3756	1.0961	5.613
-2.4627	5.0788	10.552	9.9313	14.499	2.5938	8.4177	1.0852	5.5661
-2.4623	4.9835	10.462	9.8861	14.527	2.6108	8.433	1.0744	5.5196
-2.4619	4.8915	10.377	9.8412	14.555	2.6275	8.4486	1.064	5.4735
-2.4615	4.8027	10.295	9.7966	14.585	2.644	8.4644	1.0537	5.4281
-2.4611	4.7171	10.218	9.7522	14.616	2.6601	8.4808	1.0437	5.3833
-2.4607	4.6345	10.145	9.7187	14.666	2.6759	8.4978	1.034	5.3391
-2.4603	4.5551	10.076	9.6755	14.699	2.6914	8.5157	1.0245	5.2957
-2.4599	4.4837	10.023	9.6325	14.733	2.7066	8.5345	1.0153	5.2532
-2.4595	4.4105	9.9619	9.5898	14.767	2.7215	8.5545	1.0064	5.2115
-2.4591	4.3455	9.8973	9.5473	14.802	2.7361	8.5758	0.99781	5.1708
-2.4587	4.2785	9.8426	9.5051	14.837	2.7505	8.5986	0.98204	5.0786
-2.4583	4.2144	9.7912	9.4631	14.872	2.7646	8.6229	0.97451	5.043
-2.4579	4.1531	9.7426	9.4213	14.907	2.7784	8.6491	0.96729	5.0084
-2.4575	4.0898	9.6818	9.3802	14.921	2.792	8.6771	0.96039	4.9749
-2.4571	4.0343	9.6395	9.34	14.956	2.8053	8.7072	0.95381	4.9425
-2.4567	3.9865	9.6148	9.3	14.991	2.8183	8.7396	0.94757	4.9114
-2.4563	3.9366	9.5785	9.2602	15.025	2.8312	8.7742	0.94168	4.8816
-2.4559	3.8891	9.5445	9.2206	15.058	2.8438	8.8112	0.9442	4.9103
-2.4555	3.8442	9.5126	9.1811	15.09	2.8562	8.8508	0.93953	4.8869
-2.4551	3.8018	9.4827	9.1418	15.121	2.8684	8.8931	0.93525	4.8651
-2.4547	3.7617	9.4547	9.1026	15.15	2.8804	8.9381	0.93138	4.8451
-2.4543	3.7451	9.4284	9.0636	15.179	2.8922	8.9859	0.92023	4.8207
-2.4539	3.738	9.4038	9.0247	15.206	2.9038	9.0366	0.91765	4.8043
-2.4535	3.7331	9.3807	8.9859	15.231	2.9152	9.0903	0.91548	4.7899
-2.4531	3.6956	9.3444	8.9373	15.26	2.9265	9.1471	0.91372	4.7776
-2.4527	3.6626	9.3252	8.8994	15.282	2.9376	9.2069	0.91239	4.7674
-2.4523	3.627	9.2789	8.8615	15.301	2.9486	9.2698	0.91148	4.7594
-2.4519	3.5987	9.2637	8.8137	15.321	2.9595	9.3358	0.91101	4.7536
-2.4515	3.5725	9.2495	8.7985	15.343	2.9702	9.405	0.91098	4.75
-2.4511	3.5484	9.2362	8.7627	15.356	2.9808	9.4773	0.9114	4.7487
-2.4507	3.5262	9.2237	8.727	15.367	2.9913	9.5527	0.91227	4.7498
-2.4503	3.4697	9.2181	8.6915	15.375	3.0018	9.6313	0.91358	4.7533
-2.4499	3.4736	9.2069	8.656	15.381	3.0121	9.7129	0.91536	4.7592
-2.4495	3.4792	9.1964	8.6206	15.384	3.0224	9.7977	0.91759	4.7675
-2.4491	3.4767	9.174	8.5854	15.385	3.0326	9.8854	0.92029	4.7783
-2.4487	3.4861	9.1656	8.5502	15.383	3.0428	9.9761	0.92345	4.7916
-2.4483	3.4971	9.158	8.5152	15.378	3.0529	10.07	0.92706	4.8074
-2.4479	3.505	9.1575	8.4803	15.37	3.063	10.166	0.93115	4.8257
-2.4475	3.5194	9.1507	8.4455	15.359	3.0731	10.265	0.93569	4.8465
-2.4471	3.5353	9.1446	8.4108	15.345	3.0832	10.367	0.94069	4.8699
-2.4467	3.558	9.1351	8.3763	15.328	3.0933	10.472	0.94615	4.8957
-2.4463	3.5724	9.1309	8.3419	15.308	3.1034	10.579	0.95207	4.9241
-2.4459	3.5933	9.1264	8.3077	15.285	3.1135	10.689	0.95844	4.9549
-2.4455	3.6157	9.1226	8.2736	15.259	3.1237	10.8	0.96525	4.9882
-2.4451	3.6395	9.1194	8.2193	15.239	3.1338	10.915	0.97251	5.0239
-2.4447	3.6314	9.117	8.1867	15.206	3.1441	11.031	0.98021	5.0621
-2.4443	3.6247	9.1152	8.1543	15.17	3.1544	11.149	0.98834	5.1027
-2.4439	3.6193	9.1142	8.1219	15.131	3.1647	11.269	0.9969	5.1456
-2.4435	3.6104	9.0883	8.0798	15.093	3.1752	11.392	1.0059	5.1908
-2.4431	3.598	9.0774	8.0483	15.047	3.1857	11.516	1.0153	5.2382
-2.4427	3.6024	9.0991	8.017	14.999	3.1963	11.641	1.0251	5.2879
-2.4423	3.6029	9.1041	7.9755	14.951	3.2069	11.768	1.0352	5.3398
-2.4419	3.5948	9.1242	7.945	14.897	3.2177	11.897	1.0458	5.3937
-2.4415	3.598	9.13	7.9046	14.814	3.3049	12.002	1.0567	5.4497
-2.4411	3.6021	9.1366	7.8646	14.756	3.3206	12.132	1.0681	5.5077
-2.4407	3.5484	9.1513	7.8358	14.694	3.3367	12.263	1.0797	5.5677
-2.4403	3.5577	9.1592	7.807	14.63	3.3531	12.395	1.0917	5.6295
-2.4399	3.5678	9.1679	7.7785	14.562	3.37	12.528	1.104	5.6931
-2.4395	3.5784	9.1775	7.75	14.492	3.3872	12.661	1.1167	5.7584
-2.4391	3.5848	9.163	7.7218	14.42	3.4049	12.795	1.1296	5.8254
-2.4387	3.5872	9.1609	7.6937	14.345	3.4231	12.93	1.1429	5.8939
-2.4383	3.5955	9.1629	7.6658	14.267	3.4417	13.065	1.1564	5.9639
-2.4379	3.6095	9.1791	7.6382	14.188	3.4607	13.201	1.1702	6.0354
-2.4375	3.624	9.196	7.6108	14.107	3.4803	13.337	1.1842	6.1082
-2.4371	3.7004	9.2056	7.5836	14.024	3.5004	13.473	1.1985	6.1822
-2.4367	3.7195	9.2236	7.5465	13.926	3.521	13.609	1.2129	6.2574
-2.4363	3.7392	9.2422	7.5205	13.84	3.5421	13.745	1.2276	6.3337
-2.4359	3.7594	9.2616	7.4948	13.752	3.5638	13.881	1.2425	6.411
-2.4355	3.7802	9.2818	7.4694	13.664	3.586	14.017	1.2575	6.4892
-2.4351	3.7965	9.2891	7.4442	13.574	3.6088	14.153	1.2727	6.5683
-2.4347	3.8186	9.3115	7.4095	13.488	3.6322	14.288	1.288	6.6481
-2.4343	3.8413	9.3347	7.3856	13.397	3.6561	14.423	1.3034	6.7285
-2.4339	3.8643	9.3585	7.3621	13.304	3.6807	14.557	1.3189	6.8095
-2.4335	3.8879	9.3831	7.3388	13.211	3.7059	14.691	1.3346	6.8909
-2.4331	3.9119	9.4083	7.316	13.119	3.7317	14.824	1.3502	6.9728
-2.4327	3.9364	9.4343	7.2934	13.026	3.7582	14.956	1.366	7.0549
-2.4323	3.9564	9.4475	7.2713	12.933	3.7853	15.087	1.3817	7.1372
-2.4319	3.9772	9.4628	7.2496	12.841	3.813	15.218	1.3975	7.2196
-2.4315	4.0035	9.4924	7.2282	12.75	3.8415	15.347	1.4132	7.3021
-2.4311	4.0302	9.5227	7.2073	12.659	3.8706	15.475	1.429	7.3845
-2.4307	4.0619	9.5536	7.1867	12.57	3.9003	15.602	1.4447	7.4667
-2.4303	4.0967	9.5842	7.1666	12.482	3.9308	15.728	1.4603	7.5486
-2.4299	4.1319	9.6154	7.147	12.396	3.9619	15.853	1.4759	7.6303
-2.4295	4.1674	9.6473	7.1278	12.311	3.9938	15.975	1.4913	7.7115
-2.4291	4.2035	9.6799	7.109	12.229	4.0263	16.097	1.4989	7.7984
-2.4287	4.2399	9.7131	7.0907	12.149	4.0596	16.216	1.5145	7.8781
-2.4283	4.2768	9.7471	7.0728	12.071	4.0935	16.334	1.53	7.9572
-2.4279	4.3141	9.7817	7.0451	12.002	4.1282	16.45	1.5453	8.0355
-2.4275	4.3519	9.817	7.0288	11.93	4.1636	16.565	1.5605	8.113
-2.4271	4.3905	9.8595	7.0128	11.86	4.1997	16.677	1.5754	8.1896
-2.4267	4.4299	9.8984	6.9974	11.794	4.2366	16.787	1.59	8.2651
-2.4263	4.4698	9.938	6.9823	11.732	4.2741	16.895	1.6044	8.3396
-2.4259	4.5102	9.9785	6.9577	11.65	4.3124	17.001	1.6186	8.413
-2.4255	4.5512	10.02	6.9441	11.595	4.3514	17.104	1.6324	8.4851
-2.4251	4.5927	10.062	6.9308	11.545	4.3911	17.205	1.646	8.5559
-2.4247	4.64	10.117	6.918	11.499	4.4315	17.304	1.6593	8.6253
-2.4243	4.683	10.162	6.9055	11.456	4.4617	17.399	1.6722	8.6933
-2.4239	4.7267	10.208	6.8934	11.419	4.4598	17.492	1.6848	8.7598
-2.4235	4.7711	10.254	6.8817	11.385	4.4586	17.583	1.6971	8.8247
-2.4231	4.8161	10.302	6.8703	11.356	4.458	17.67	1.709	8.888
-2.4227	4.8618	10.351	6.8593	11.331	4.458	17.754	1.7205	8.9496
-2.4223	4.9082	10.4	6.8486	11.311	4.4586	17.836	1.7316	9.0094
-2.4219	4.9554	10.451	6.8383	11.296	4.4597	17.914	1.7424	9.0674
-2.4215	5.0033	10.504	6.8283	11.285	4.4614	17.989	1.7527	9.1235
-2.4211	5.052	10.557	6.8085	11.265	4.4635	18.06	1.7626	9.1777
-2.4207	5.1014	10.612	6.7997	11.265	4.466	18.128	1.7721	9.2299
-2.4203	5.1517	10.667	6.791	11.268	4.4689	18.193	1.7812	9.2801
-2.4199	5.2081	10.735	6.7826	11.276	4.4722	18.254	1.7898	9.3283
-2.4195	5.2604	10.793	6.7744	11.288	4.4757	18.311	1.798	9.3743
-2.4191	5.3088	10.838	6.7663	11.305	4.4796	18.365	1.8057	9.4182
-2.4187	5.3632	10.9	6.7692	11.359	4.4837	18.415	1.8129	9.4599
-2.4183	5.4238	10.961	6.7621	11.386	4.4881	18.46	1.8196	9.4994
-2.4179	5.4804	11.025	6.7552	11.417	4.4926	18.502	1.8259	9.5366
-2.4175	5.538	11.091	6.7484	11.451	4.4973	18.54	1.8317	9.5716
-2.4171	5.5966	11.159	6.7417	11.489	4.502	18.574	1.8369	9.6042
-2.4167	5.6613	11.236	6.7351	11.53	4.5069	18.603	1.8417	9.6346
-2.4163	5.7223	11.306	6.7286	11.575	4.5118	18.628	1.846	9.6625
-2.4159	5.7843	11.377	6.7221	11.622	4.5166	18.649	1.8498	9.6882
-2.4155	5.825	11.449	6.7156	11.672	4.5215	18.665	1.853	9.7114
-2.4151	5.8062	11.523	6.7091	11.725	4.5263	18.677	1.8558	9.7322
-2.4147	5.7882	11.598	6.7026	11.78	4.531	18.685	1.858	9.7506
-2.4143	5.771	11.675	6.696	11.838	4.5355	18.688	1.8597	9.7666
-2.4139	5.7545	11.752	6.6893	11.897	4.5399	18.686	1.8609	9.7802
-2.4135	5.7389	11.83	6.6825	11.958	4.5441	18.68	1.8539	9.7427
-2.4131	5.724	11.91	6.6755	12.02	4.548	18.669	1.8545	9.7542
-2.4127	5.7099	11.991	6.6684	12.084	4.5518	18.653	1.8625	9.7908
-2.4123	5.6966	12.072	6.6508	12.155	4.5552	18.633	1.8625	9.7987
-2.4119	5.6841	12.155	6.6439	12.22	4.5583	18.608	1.862	9.8041
-2.4115	5.6724	12.239	6.6366	12.286	4.561	18.579	1.861	9.807
-2.4111	5.6668	12.332	6.6291	12.352	4.5634	18.545	1.8594	9.8074
-2.4107	5.657	12.418	6.6111	12.425	4.5654	18.506	1.8574	9.8054
-2.4103	5.6482	12.504	6.6034	12.491	4.567	18.462	1.8549	9.801
-2.4099	5.6401	12.591	6.5848	12.545	4.5682	18.414	1.8519	9.7942
-2.4095	5.6329	12.679	6.5769	12.612	4.5688	18.361	1.8485	9.785
-2.4091	5.6266	12.767	6.5684	12.678	4.569	18.303	1.8445	9.7734
-2.4087	5.6211	12.855	6.5594	12.743	4.5687	18.241	1.8401	9.7596
-2.4083	5.6268	12.947	6.5498	12.807	4.5678	18.174	1.8352	9.7434
-2.4079	5.6237	13.037	6.5397	12.87	4.5664	18.103	1.8299	9.7249
-2.4075	5.6216	13.126	6.5289	12.931	4.5644	18.028	1.8241	9.7042
-2.4071	5.6203	13.216	6.5175	12.991	4.5618	17.948	1.8179	9.6813
-2.4067	5.62	13.306	6.5055	13.05	4.4889	17.884	1.8113	9.6561
-2.4063	5.6206	13.396	6.5033	13.148	4.4892	17.795	1.8042	9.6289
-2.4059	5.6222	13.485	6.4906	13.206	4.4887	17.701	1.7968	9.5995
-2.4055	5.6247	13.575	6.4772	13.261	4.4873	17.603	1.7889	9.568
-2.4051	5.6282	13.664	6.463	13.315	4.4851	17.502	1.7807	9.5344
-2.4047	5.6326	13.753	6.4482	13.366	4.4819	17.396	1.7721	9.4989
-2.4043	5.6381	13.842	6.4434	13.414	4.478	17.287	1.771	9.4858
-2.4039	5.6445	13.93	6.4278	13.461	4.4732	17.175	1.7622	9.4476
-2.4035	5.6624	14.03	6.4114	13.505	4.4675	17.058	1.753	9.4076
-2.4031	5.6714	14.117	6.3943	13.546	4.4609	16.939	1.7436	9.3658
-2.4027	5.6816	14.204	6.3765	13.585	4.4536	16.816	1.7338	9.3222
-2.4023	5.6928	14.29	6.358	13.621	4.4453	16.69	1.7238	9.2768
-2.4019	5.7051	14.376	6.3387	13.654	4.4362	16.561	1.7135	9.2298
-2.4015	5.7184	14.46	6.3081	13.643	4.4263	16.43	1.703	9.1812
-2.4011	5.7329	14.544	6.2879	13.672	4.4155	16.295	1.6922	9.1309
-2.4007	5.7484	14.627	6.2669	13.699	4.4038	16.159	1.6812	9.0791
-2.4003	5.7651	14.709	6.245	13.723	4.3914	16.02	1.67	9.0258
-2.3999	5.7829	14.789	6.2224	13.744	4.3781	15.878	1.6586	8.9711
-2.3995	5.8019	14.869	6.1989	13.761	4.364	15.735	1.647	8.9149
-2.3991	5.822	14.947	6.1747	13.776	4.349	15.59	1.6353	8.8573
-2.3987	5.8433	15.025	6.1602	13.83	4.3333	15.443	1.6234	8.7985
-2.3983	5.8657	15.101	6.135	13.841	4.3168	15.294	1.6114	8.7383
-2.3979	5.8893	15.176	6.1091	13.849	4.2995	15.144	1.5993	8.677
-2.3975	5.9141	15.249	6.0825	13.853	4.2814	14.993	1.587	8.6144
-2.3971	5.9453	15.32	6.0551	13.855	4.2625	14.841	1.5747	8.5508
-2.3967	5.9728	15.391	6.027	13.854	4.2429	14.689	1.5623	8.4861
-2.3963	6.0672	15.447	5.988	13.852	4.2225	14.535	1.5498	8.4204
-2.3959	6.1013	15.514	5.9591	13.845	4.2014	14.381	1.5373	8.3537
-2.3955	6.1368	15.58	5.9295	13.836	4.1796	14.227	1.5248	8.2862
-2.3951	6.1737	15.645	5.8993	13.823	4.157	14.072	1.5122	8.2178
-2.3947	6.2122	15.708	5.8683	13.808	4.1338	13.918	1.4997	8.1486
-2.3943	6.2522	15.77	5.8368	13.79	4.1099	13.764	1.4871	8.0787
-2.3939	6.2937	15.831	5.8046	13.77	4.0852	13.61	1.4746	8.0082
-2.3935	6.305	15.89	5.7718	13.747	4.06	13.456	1.4622	7.9371
-2.3931	6.2771	15.948	5.7385	13.722	4.0341	13.303	1.4577	7.8883
-2.3927	6.2505	16.005	5.7046	13.694	4.0075	13.151	1.4459	7.8178
-2.3923	6.2252	16.061	5.6702	13.664	3.9803	13	1.4342	7.7471
-2.3919	6.2013	16.115	5.6354	13.632	3.9526	12.85	1.4307	7.7296
-2.3915	6.174	16.134	5.6	13.597	3.9242	12.701	1.4197	7.6618
-2.3911	6.1532	16.188	5.5643	13.561	3.8952	12.554	1.409	7.5943
-2.3907	6.1337	16.241	5.5282	13.523	3.8657	12.408	1.3984	7.527
-2.3903	6.1157	16.293	5.4917	13.483	3.8357	12.263	1.3881	7.4601
-2.3899	6.0943	16.347	5.4549	13.441	3.8051	12.12	1.378	7.3937
-2.3895	6.0795	16.397	5.4178	13.398	3.774	11.979	1.3682	7.3279
-2.3891	6.0661	16.445	5.3805	13.353	3.7424	11.839	1.3586	7.263
-2.3887	6.0542	16.493	5.3429	13.307	3.7104	11.701	1.3493	7.1988
-2.3883	6.0389	16.541	5.3051	13.26	3.6778	11.566	1.3404	7.1358
-2.3879	6.0908	16.581	5.2782	13.256	3.6448	11.432	1.3317	7.0738
-2.3875	6.0873	16.626	5.2309	13.212	3.6114	11.3	1.3233	7.0132
-2.3871	6.0855	16.671	5.1839	13.167	3.5776	11.17	1.3153	6.954
-2.3867	6.0854	16.715	5.1477	13.119	3.5433	11.042	1.3077	6.8964
-2.3863	6.0922	16.752	5.1115	13.07	3.5087	10.917	1.3004	6.8406
-2.3859	6.0959	16.795	5.0752	13.021	3.4737	10.793	1.2935	6.7868
-2.3855	6.1013	16.837	5.0391	12.971	3.4383	10.671	1.287	6.735
-2.3851	6.1086	16.879	5.0137	12.967	3.4026	10.552	1.281	6.6854
-2.3847	6.1177	16.921	4.9785	12.92	3.3666	10.434	1.2753	6.6384
-2.3843	6.1285	16.963	4.9435	12.874	3.3302	10.319	1.2701	6.5939
-2.3839	6.1413	17.004	4.9087	12.828	3.2936	10.205	1.2653	6.5523
-2.3835	6.1558	17.045	4.8742	12.783	3.2567	10.093	1.261	6.5136
-2.3831	6.1722	17.086	4.8401	12.739	3.2195	9.9834	1.2571	6.4782
-2.3827	6.1905	17.127	4.8064	12.695	3.1821	9.8752	1.2537	6.446
-2.3823	6.2107	17.169	4.7731	12.653	3.1445	9.7687	1.2509	6.4175
-2.3819	6.2453	17.21	4.7403	12.612	3.1066	9.6639	1.2485	6.3926
-2.3815	6.3027	17.251	4.708	12.572	3.0686	9.5606	1.2466	6.3716
-2.3811	6.3621	17.293	4.6871	12.53	3.0304	9.4587	1.2452	6.3547
-2.3807	6.4234	17.334	4.6566	12.493	2.992	9.3582	1.2444	6.3421
-2.3803	6.4868	17.376	4.6164	12.458	2.9534	9.259	1.2441	6.3338
-2.3799	6.5523	17.418	4.5879	12.425	2.897	9.1185	1.2443	6.33
-2.3795	6.6823	17.455	4.5601	12.394	2.8593	9.0251	1.2451	6.331
-2.3791	6.7558	17.498	4.533	12.364	2.8213	8.9325	1.2464	6.3367
-2.3787	6.8317	17.54	4.5067	12.337	2.7833	8.8406	1.2483	6.3473
-2.3783	6.91	17.583	4.4812	12.313	2.7451	8.7492	1.2508	6.363
-2.3779	6.9908	17.627	4.4566	12.291	2.7068	8.6583	1.2538	6.3837
-2.3775	7.0688	17.665	4.4329	12.271	2.6684	8.5678	1.2574	6.4097
-2.3771	7.0859	17.708	4.3999	12.258	2.6299	8.4777	1.2615	6.4408
-2.3767	7.1052	17.752	4.3787	12.244	2.5914	8.3879	1.2662	6.4771
-2.3763	7.1266	17.796	4.3583	12.233	2.5528	8.2982	1.2716	6.5188
-2.3759	7.1501	17.84	4.3389	12.225	2.5142	8.2086	1.2774	6.5657
-2.3755	7.1757	17.884	4.3205	12.22	2.4756	8.1192	1.2839	6.6178
-2.3751	7.2035	17.928	4.3032	12.218	2.437	8.0297	1.291	6.6752
-2.3747	7.2334	17.972	4.2978	12.219	2.3984	7.9401	1.2986	6.7377
-2.3743	7.2654	18.016	4.2832	12.223	2.3599	7.8504	1.3068	6.8054
-2.3739	7.2422	18.061	4.2697	12.231	2.3214	7.7605	1.3155	6.878
-2.3735	7.2162	18.106	4.2574	12.243	2.283	7.6704	1.3249	6.9556
-2.3731	7.1922	18.15	4.2463	12.258	2.2637	7.606	1.3348	7.038
-2.3727	7.1703	18.194	4.2363	12.276	2.2266	7.5158	1.3536	7.1785
-2.3723	7.1557	18.24	4.2275	12.298	2.1897	7.4253	1.3651	7.2739
-2.3719	7.1381	18.284	4.22	12.323	2.153	7.3344	1.3772	7.3741
-2.3715	7.1225	18.327	4.2136	12.352	2.1165	7.243	1.3899	7.4787
-2.3711	7.1088	18.37	4.2085	12.385	2.0802	7.1512	1.4032	7.5877
-2.3707	7.0971	18.413	4.2046	12.421	2.0441	7.059	1.417	7.7009
-2.3703	7.0872	18.455	4.2129	12.465	2.0083	6.9662	1.4313	7.8182
-2.3699	7.0792	18.496	4.2122	12.508	1.9728	6.873	1.4463	7.9394
-2.3695	7.073	18.537	4.2128	12.555	1.9375	6.7793	1.4617	8.0643
-2.3691	7.0953	18.577	4.2146	12.605	1.9026	6.6851	1.4777	8.1927
-2.3687	7.1355	18.616	4.2285	12.656	1.868	6.5905	1.4942	8.3246
-2.3683	7.1726	18.625	4.2337	12.713	1.8337	6.4953	1.5112	8.4597
-2.3679	7.2218	18.656	4.2401	12.773	1.7997	6.3998	1.5288	8.5978
-2.3675	7.263	18.7	4.2479	12.837	1.7662	6.3037	1.5468	8.7388
-2.3671	7.311	18.735	4.2569	12.904	1.733	6.2073	1.5652	8.8825
-2.3667	7.3608	18.769	4.2569	12.978	1.7001	6.1105	1.5842	9.0288
-2.3663	7.4074	18.797	4.2692	13.051	1.6677	6.0134	1.6036	9.1774
-2.3659	7.4609	18.828	4.2828	13.127	1.6358	5.9159	1.6234	9.3282
-2.3655	7.516	18.858	4.2976	13.206	1.6042	5.8182	1.6436	9.481
-2.3651	7.5728	18.886	4.3246	13.285	1.5731	5.7203	1.6643	9.6357
-2.3647	7.6313	18.912	4.3426	13.369	1.5425	5.6221	1.6853	9.7921
-2.3643	7.6915	18.937	4.3618	13.456	1.5123	5.5238	1.7067	9.9499
-2.3639	7.7532	18.96	4.3823	13.546	1.4827	5.4255	1.7285	10.109
-2.3635	7.8167	18.981	4.404	13.638	1.4535	5.327	1.7506	10.27
-2.3631	7.8817	19	4.427	13.733	1.4249	5.2287	1.773	10.431
-2.3627	7.9484	19.017	4.4511	13.829	1.3968	5.1304	1.7957	10.593
-2.3623	8.0167	19.033	4.4764	13.928	1.3692	5.0322	1.8187	10.756
-2.3619	8.0866	19.046	4.5136	14.036	1.3422	4.9343	1.842	10.92
-2.3615	8.1581	19.057	4.5419	14.139	1.3157	4.8367	1.8655	11.084
-2.3611	8.2311	19.066	4.5713	14.244	1.2898	4.7394	1.8893	11.248
-2.3607	8.3057	19.073	4.6019	14.35	1.2645	4.6425	1.9057	11.402
-2.3603	8.3818	19.078	4.6336	14.458	1.2398	4.5462	1.9303	11.567
-2.3599	8.4595	19.081	4.6664	14.567	1.2157	4.4505	1.955	11.731
-2.3595	8.5387	19.082	4.7002	14.677	1.1922	4.3555	1.9882	11.907
-2.3591	8.6193	19.08	4.7351	14.788	1.1694	4.2612	2.0136	12.072
-2.3587	8.7014	19.076	4.771	14.9	1.1472	4.1679	2.0392	12.236
-2.3583	8.785	19.07	4.8079	15.013	1.1256	4.0755	2.0648	12.399
-2.3579	8.87	19.062	4.8457	15.127	1.1047	3.9842	2.0906	12.561
-2.3575	8.9564	19.052	4.8845	15.241	1.0844	3.8941	2.1163	12.722
-2.3571	9.0442	19.039	4.9242	15.355	1.0648	3.8053	2.1343	12.825
-2.3567	9.1333	19.025	4.9648	15.469	1.0459	3.7179	2.1606	12.987
-2.3563	9.2237	19.008	5.0168	15.583	1.0277	3.6321	2.1868	13.148
-2.3559	9.3119	18.989	5.0597	15.697	1.0101	3.5481	2.213	13.307
-2.3555	9.2994	18.969	5.1034	15.811	0.99328	3.4659	2.2391	13.464
-2.3551	9.2298	18.951	5.148	15.925	0.97713	3.3857	2.2651	13.619
-2.3547	9.2241	18.926	5.1933	16.038	0.96168	3.3077	2.291	13.772
-2.3543	9.22	18.899	5.2393	16.15	0.94695	3.232	2.3167	13.923
-2.3539	9.2173	18.87	5.286	16.262	0.93293	3.1589	2.3424	14.072
-2.3535	9.2161	18.84	5.3335	16.372	0.9948	3.0629	2.3678	14.218
-2.3531	9.2114	18.804	5.3815	16.482	0.98685	2.9937	2.3931	14.362
-2.3527	9.2134	18.77	5.4203	16.591	0.97986	2.9275	2.4181	14.504
-2.3523	9.2168	18.735	5.4702	16.698	0.97387	2.8646	2.4429	14.643
-2.3519	9.2168	18.706	5.5206	16.803	0.96887	2.8052	2.4675	14.779
-2.3515	9.2232	18.667	5.5715	16.907	0.96489	2.7495	2.4918	14.913
-2.3511	9.2309	18.627	5.6228	17.009	0.96194	2.6977	2.5158	15.044
-2.3507	9.24	18.586	5.6747	17.109	0.96003	2.6501	2.5396	15.171
-2.3503	9.2503	18.543	5.7269	17.207	0.95917	2.6069	2.563	15.296
-2.3499	9.2619	18.499	5.7795	17.303	0.95938	2.5684	2.5861	15.418
-2.3495	9.2746	18.455	5.8222	17.352	0.94242	2.4887	2.6088	15.537
-2.3491	9.2886	18.409	5.8761	17.446	0.94587	2.4602	2.6312	15.652
-2.3487	9.3037	18.362	5.9302	17.538	0.95036	2.437	2.6532	15.765
-2.3483	9.3252	18.348	5.9846	17.627	0.95591	2.4193	2.6748	15.873
-2.3479	9.3428	18.301	6.0392	17.713	0.96253	2.4073	2.6959	15.979
-2.3475	9.3616	18.254	6.094	17.796	0.97025	2.401	2.7167	16.081
-2.3471	9.3965	18.207	6.1597	17.924	0.97906	2.4006	2.737	16.18
-2.3467	9.4775	18.168	6.2154	18.004	0.98899	2.4059	2.7568	16.275
-2.3463	9.5595	18.12	6.2713	18.081	0.98235	2.3535	2.7762	16.366
-2.3459	9.6424	18.071	6.3272	18.155	0.99559	2.3718	2.795	16.454
-2.3455	9.7261	18.023	6.3942	18.222	1.0099	2.3959	2.8134	16.538
-2.3451	9.8106	17.974	6.4509	18.29	1.0254	2.4256	2.8313	16.619
-2.3447	9.8958	17.925	6.5078	18.354	1.042	2.4607	2.8487	16.695
-2.3443	9.9818	17.875	6.5647	18.415	1.0597	2.501	2.8655	16.769
-2.3439	10.069	17.826	6.6216	18.473	1.0786	2.5462	2.8818	16.838
-2.3435	10.218	17.772	6.6895	18.576	1.0986	2.5961	2.8975	16.903
-2.3431	10.31	17.723	6.7471	18.629	1.1198	2.6504	2.9127	16.965
-2.3427	10.403	17.674	6.8046	18.68	1.1422	2.7089	2.9273	17.023
-2.3423	10.497	17.625	6.8621	18.727	1.1658	2.7712	2.9413	17.077
-2.3419	10.592	17.577	6.9196	18.77	1.1906	2.8372	2.9547	17.127
-2.3415	10.687	17.528	6.977	18.81	1.2167	2.9066	2.9676	17.173
-2.3411	10.783	17.48	7.0343	18.847	1.2439	2.9792	2.9798	17.216
-2.3407	10.885	17.453	7.0914	18.88	1.2724	3.0546	2.9915	17.254
-2.3403	10.988	17.433	7.1385	18.867	1.3022	3.1328	3.0025	17.289
-2.3399	10.988	17.389	7.2069	18.897	1.3332	3.2135	3.0129	17.32
-2.3395	10.887	17.347	7.2649	18.922	1.3655	3.2964	3.0228	17.347
-2.3391	10.845	17.3	7.3226	18.945	1.399	3.3815	3.0319	17.37
-2.3387	10.81	17.257	7.3802	18.963	1.4338	3.4686	3.0405	17.39
-2.3383	10.777	17.215	7.4375	18.978	1.4699	3.5574	3.0484	17.406
-2.3379	10.746	17.173	7.4946	18.99	1.5073	3.6479	3.0558	17.417
-2.3375	10.717	17.131	7.5515	18.998	1.5313	3.7398	3.0625	17.426
-2.3371	10.69	17.09	7.5981	19.001	1.5323	3.8331	3.0685	17.43
-2.3367	10.606	17.053	7.655	19.002	1.553	3.9251	3.082	17.487
-2.3363	10.587	17.012	7.7115	19	1.5576	4.0212	3.0873	17.488
-2.3359	10.57	16.971	7.7678	18.995	1.5635	4.1184	3.0842	17.468
-2.3355	10.554	16.931	7.8237	18.987	1.5706	4.2164	3.0887	17.463
-2.3351	10.541	16.891	7.8792	18.976	1.5789	4.3153	3.0927	17.454
-2.3347	10.529	16.851	7.9343	18.961	1.5883	4.4149	3.096	17.442
-2.3343	10.519	16.811	7.989	18.944	1.599	4.5152	3.0988	17.427
-2.3339	10.511	16.77	8.0542	18.97	1.6107	4.616	3.1009	17.408
-2.3335	10.505	16.73	8.1088	18.95	1.6235	4.7173	3.1024	17.387
-2.3331	10.501	16.69	8.163	18.928	1.6374	4.819	3.1034	17.362
-2.3327	10.498	16.649	8.2167	18.902	1.6524	4.9209	3.1038	17.334
-2.3323	10.497	16.608	8.2701	18.875	1.6683	5.0231	3.1036	17.303
-2.3319	10.498	16.567	8.323	18.845	1.6852	5.1255	3.1028	17.27
-2.3315	10.562	16.524	8.355	18.774	1.7031	5.2279	3.1015	17.233
-2.3311	10.57	16.482	8.4082	18.742	1.7219	5.3304	3.0996	17.194
-2.3307	10.58	16.44	8.4609	18.709	1.7416	5.4328	3.0972	17.152
-2.3303	10.592	16.397	8.513	18.673	1.7621	5.5352	3.0943	17.107
-2.3299	10.606	16.353	8.5645	18.635	1.7835	5.6373	3.0909	17.06
-2.3295	10.6	16.309	8.6155	18.596	1.8057	5.7392	3.0869	17.01
-2.3291	10.497	16.264	8.6659	18.555	1.8286	5.8409	3.0825	16.958
-2.3287	10.397	16.218	8.7158	18.513	1.8523	5.9422	3.0775	16.904
-2.3283	10.298	16.171	8.765	18.469	1.8766	6.0431	3.0721	16.847
-2.3279	10.201	16.124	8.8136	18.424	1.9017	6.1436	3.0663	16.788
-2.3275	10.106	16.075	8.8616	18.378	1.9274	6.2436	3.0599	16.727
-2.3271	10.013	16.026	8.909	18.331	1.9537	6.3431	3.0532	16.664
-2.3267	9.9174	15.983	8.9558	18.283	1.9806	6.4421	3.046	16.599
-2.3263	9.8288	15.931	9.0019	18.235	2.0821	6.5152	3.0383	16.532
-2.3259	9.7424	15.878	9.0474	18.186	2.1146	6.6113	3.0303	16.463
-2.3255	9.6581	15.824	9.0922	18.136	2.1479	6.7067	3.0219	16.392
-2.3251	9.5759	15.769	9.1363	18.087	2.1819	6.8013	3.0131	16.32
-2.3247	9.496	15.713	9.1797	18.037	2.2166	6.8951	3.0039	16.246
-2.3243	9.4182	15.656	9.2224	17.987	2.252	6.9881	2.9944	16.171
-2.3239	9.3303	15.597	9.2644	17.936	2.288	7.0802	2.9845	16.094
-2.3235	9.1972	15.538	9.3057	17.887	2.3247	7.1715	2.9743	16.015
-2.3231	9.0663	15.477	9.3463	17.837	2.3621	7.2619	2.9637	15.936
-2.3227	8.8795	15.422	9.3861	17.788	2.4001	7.3514	2.9529	15.855
-2.3223	8.7561	15.359	9.4251	17.739	2.4387	7.44	2.9417	15.773
-2.3219	8.6346	15.295	9.4634	17.691	2.4778	7.5277	2.9303	15.69
-2.3215	8.5151	15.23	9.5009	17.644	2.4457	7.6404	2.9185	15.606
-2.3211	8.3975	15.164	9.5376	17.597	2.4903	7.725	2.9065	15.521
-2.3207	8.2818	15.097	9.5735	17.551	2.5352	7.8088	2.8943	15.435
-2.3203	8.168	15.029	9.6086	17.507	2.5804	7.8917	2.8818	15.348
-2.3199	8.0562	14.961	9.6428	17.463	2.6259	7.9739	2.8691	15.261
-2.3195	7.9462	14.891	9.6762	17.42	2.6718	8.0553	2.8561	15.173
-2.3191	7.8382	14.822	9.7088	17.379	2.718	8.136	2.843	15.084
-2.3187	7.7321	14.751	9.7405	17.339	2.7646	8.2159	2.8296	14.994
-2.3183	7.6279	14.68	9.7713	17.3	2.8115	8.2952	2.816	14.904
-2.3179	7.5256	14.609	9.8012	17.263	2.8587	8.3738	2.8023	14.814
-2.3175	7.4252	14.537	9.8302	17.227	2.9063	8.4518	2.7884	14.723
-2.3171	7.267	14.468	9.8583	17.192	2.9541	8.5292	2.7744	14.632
-2.3167	7.1738	14.396	9.8854	17.159	3.0024	8.606	2.7601	14.541
-2.3163	7.0823	14.324	9.9116	17.128	3.051	8.6824	2.7458	14.449
-2.3159	6.9925	14.252	9.9369	17.098	3.1193	8.8334	2.7313	14.358
-2.3155	6.9043	14.181	9.9612	17.07	3.1697	8.9128	2.7167	14.266
-2.3151	6.8178	14.109	9.9845	17.043	3.2206	8.9919	2.702	14.174
-2.3147	6.733	14.038	10.018	17.012	3.2719	9.0709	2.6872	14.082
-2.3143	6.6498	13.968	10.04	16.988	3.3236	9.1499	2.6722	13.99
-2.3139	6.5683	13.898	10.061	16.965	3.3758	9.2287	2.6572	13.898
-2.3135	6.4934	13.843	10.092	16.938	3.4284	9.3076	2.6421	13.806
-2.3131	6.4154	13.777	10.111	16.918	3.4815	9.3866	2.627	13.714
-2.3127	6.339	13.712	10.13	16.9	3.535	9.4657	2.6117	13.622
-2.3123	6.2643	13.648	10.148	16.884	3.589	9.5449	2.5964	13.531
-2.3119	6.1962	13.578	10.165	16.869	3.6435	9.6244	2.5811	13.44
-2.3115	6.1249	13.516	10.18	16.855	3.6985	9.7042	2.5657	13.349
-2.3111	6.0552	13.457	10.195	16.843	3.754	9.7843	2.5502	13.258
-2.3107	5.9292	13.404	10.209	16.832	3.8099	9.8648	2.5347	13.168
-2.3103	5.8661	13.349	10.222	16.823	3.8664	9.9457	2.5192	13.078
-2.3099	5.8043	13.295	10.233	16.815	3.9235	10.027	2.5037	12.988
-2.3095	5.7438	13.244	10.244	16.808	3.981	10.109	2.4881	12.898
-2.3091	5.6938	13.195	10.254	16.802	4.0392	10.191	2.4725	12.809
-2.3087	5.6452	13.149	10.262	16.797	4.0978	10.274	2.457	12.721
-2.3083	5.5979	13.105	10.27	16.794	4.1571	10.358	2.4414	12.632
-2.3079	5.5519	13.064	10.276	16.792	4.2169	10.442	2.4258	12.545
-2.3075	5.5074	13.026	10.282	16.79	4.2773	10.527	2.4102	12.457
-2.3071	5.4642	12.991	10.286	16.79	4.3383	10.612	2.3946	12.37
-2.3067	5.4176	12.966	10.289	16.79	4.3999	10.698	2.379	12.284
-2.3063	5.3775	12.937	10.292	16.791	4.4622	10.784	2.3634	12.198
-2.3059	5.3387	12.911	10.293	16.793	4.5438	10.921	2.3478	12.112
-2.3055	5.3064	12.91	10.293	16.796	4.6085	11.011	2.3323	12.027
-2.3051	5.2706	12.892	10.292	16.799	4.6738	11.101	2.3168	11.942
-2.3047	5.2313	12.862	10.301	16.81	4.7399	11.192	2.3012	11.858
-2.3043	5.262	12.845	10.298	16.815	4.8067	11.283	2.2857	11.774
-2.3039	5.2346	12.837	10.295	16.82	4.8742	11.374	2.2703	11.691
-2.3035	5.2088	12.833	10.29	16.826	4.9424	11.466	2.2548	11.608
-2.3031	5.1846	12.833	10.284	16.831	5.0115	11.559	2.2394	11.526
-2.3027	5.162	12.835	10.289	16.831	5.0812	11.651	2.224	11.444
-2.3023	5.141	12.841	10.281	16.836	5.1706	11.785	2.2087	11.363
-2.3019	5.1216	12.851	10.273	16.842	5.243	11.88	2.1933	11.282
-2.3015	5.1039	12.864	10.264	16.848	5.3163	11.974	2.178	11.201
-2.3011	5.0878	12.879	10.254	16.854	5.3904	12.069	2.1627	11.121
-2.3007	5.0733	12.898	10.243	16.86	5.4654	12.163	2.1475	11.042
-2.3003	5.0605	12.92	10.231	16.866	5.5412	12.258	2.1323	10.963
-2.2999	5.0445	12.927	10.218	16.871	5.6179	12.352	2.1171	10.884
-2.2995	5.0353	12.956	10.214	16.88	5.6955	12.445	2.102	10.806
-2.2991	5.0177	12.987	10.2	16.885	5.7739	12.538	2.0868	10.728
-2.2987	4.9718	13.021	10.174	16.857	5.8531	12.631	2.0717	10.651
-2.2983	4.9225	13.051	10.158	16.863	5.9332	12.723	2.0567	10.574
-2.2979	4.8797	13.09	10.142	16.869	6.0142	12.814	2.0416	10.497
-2.2975	4.8383	13.132	10.124	16.873	6.096	12.904	2.0266	10.421
-2.2971	4.7981	13.175	10.116	16.872	6.1787	12.993	2.0116	10.345
-2.2967	4.7543	13.2	10.097	16.874	6.2622	13.08	1.9967	10.27
-2.2963	4.7221	13.252	10.078	16.876	6.3465	13.167	1.9817	10.195
-2.2959	4.6862	13.302	10.057	16.877	6.4507	13.282	1.9668	10.121
-2.2955	4.6516	13.353	10.036	16.876	6.5379	13.367	1.9519	10.047
-2.2951	4.618	13.405	10.014	16.875	6.6259	13.45	1.9371	9.9732
-2.2947	4.5856	13.458	10.002	16.867	6.7147	13.532	1.9222	9.8999
-2.2943	4.5543	13.512	9.9787	16.863	6.8043	13.612	1.9074	9.827
-2.2939	4.524	13.567	9.9549	16.858	6.8948	13.691	1.8926	9.7545
-2.2935	4.4947	13.622	9.9303	16.851	6.9861	13.767	1.8778	9.6824
-2.2931	4.4664	13.678	9.9051	16.842	7.0972	13.869	1.863	9.6106
-2.2927	4.439	13.734	9.8792	16.832	7.1912	13.943	1.8482	9.5392
-2.2923	4.4125	13.79	9.8526	16.821	7.286	14.015	1.826	9.4237
-2.2919	4.3869	13.847	9.8254	16.807	7.3816	14.085	1.8117	9.3555
-2.2915	4.3622	13.903	9.7976	16.792	7.4779	14.152	1.7974	9.2876
-2.2911	4.3334	13.951	9.7692	16.775	7.5749	14.218	1.783	9.22
-2.2907	4.3105	14.007	9.7403	16.757	7.6727	14.282	1.7687	9.1525
-2.2903	4.2883	14.063	9.7108	16.736	7.7711	14.343	1.7624	9.0787
-2.2899	4.2669	14.118	9.6917	16.708	7.8702	14.403	1.7485	9.0113
-2.2895	4.2461	14.172	9.6619	16.683	7.9699	14.46	1.7347	8.9442
-2.2891	4.226	14.225	9.6316	16.656	8.0702	14.516	1.7208	8.8772
-2.2887	4.2065	14.278	9.601	16.627	8.171	14.569	1.7069	8.8105
-2.2883	4.1229	14.321	9.57	16.596	8.2723	14.62	1.693	8.744
-2.2879	4.1084	14.372	9.5386	16.562	8.3742	14.669	1.6792	8.6777
-2.2875	4.0941	14.422	9.507	16.526	8.4764	14.717	1.6653	8.6116
-2.2871	4.0802	14.47	9.475	16.488	8.5791	14.763	1.6515	8.5456
-2.2867	4.0665	14.517	9.4428	16.448	8.6821	14.807	1.6377	8.4799
-2.2863	4.0532	14.563	9.4104	16.405	8.7854	14.849	1.6239	8.4143
-2.2859	4.0453	14.622	9.3679	16.326	8.8889	14.891	1.6101	8.3489
-2.2855	4.0328	14.665	9.3357	16.281	8.9927	14.931	1.5963	8.2837
-2.2851	4.0206	14.707	9.3034	16.233	9.0967	14.97	1.5825	8.2186
-2.2847	4.0086	14.747	9.2709	16.182	9.2007	15.008	1.5687	8.1536
-2.2843	3.9968	14.786	9.2279	16.126	9.3049	15.045	1.555	8.0888
-2.2839	3.9852	14.823	9.1959	16.071	9.409	15.082	1.5338	7.9764
-2.2835	3.9094	14.842	9.1639	16.013	9.5131	15.119	1.5205	7.9144
-2.2831	3.902	14.877	9.1318	15.953	9.6172	15.156	1.5073	7.8524
-2.2827	3.8946	14.91	9.0997	15.89	9.721	15.193	1.5023	7.8178
-2.2823	3.8872	14.941	9.0677	15.825	9.8247	15.23	1.4896	7.7569
-2.2819	3.8797	14.97	9.0357	15.758	9.9281	15.269	1.4768	7.6961
-2.2815	3.8722	14.998	9.0039	15.688	10.031	15.309	1.4641	7.6352
-2.2811	3.8647	15.024	8.9829	15.626	10.134	15.35	1.4515	7.5742
-2.2807	3.8572	15.049	8.9521	15.552	10.236	15.393	1.4389	7.5132
-2.2803	3.8497	15.072	8.9215	15.477	10.338	15.438	1.4264	7.4521
-2.2799	3.8421	15.093	8.8912	15.399	10.439	15.486	1.4139	7.3909
-2.2795	3.8345	15.112	8.8612	15.319	10.54	15.537	1.4014	7.3296
-2.2791	3.8268	15.13	8.8315	15.238	10.64	15.591	1.3891	7.2682
-2.2787	3.8243	15.147	8.8023	15.155	10.739	15.648	1.3768	7.2067
-2.2783	3.8221	15.174	8.7635	15.035	10.837	15.71	1.3645	7.145
-2.2779	3.815	15.189	8.7357	14.951	10.935	15.776	1.3524	7.0832
-2.2775	3.808	15.202	8.7083	14.865	11.031	15.847	1.3403	7.0212
-2.2771	3.796	15.202	8.6815	14.778	11.127	15.924	1.3284	6.9591
-2.2767	3.7892	15.213	8.6551	14.69	11.222	16.005	1.3165	6.8967
-2.2763	3.7825	15.223	8.6293	14.601	11.315	16.093	1.3047	6.8342
-2.2759	3.7662	15.24	8.6041	14.511	11.407	16.187	1.2931	6.7714
-2.2755	3.76	15.248	8.5795	14.421	11.498	16.287	1.2815	6.7085
-2.2751	3.7538	15.255	8.5555	14.33	11.588	16.395	1.2701	6.6453
-2.2747	3.7475	15.26	8.5321	14.238	11.676	16.51	1.2588	6.5819
-2.2743	3.7412	15.265	8.5095	14.146	11.763	16.632	1.2476	6.5183
-2.2739	3.7401	15.264	8.4875	14.055	11.849	16.762	1.2366	6.4545
-2.2735	3.7342	15.267	8.4663	13.964	11.933	16.9	1.2257	6.3905
-2.2731	3.7282	15.269	8.4458	13.873	12.015	17.046	1.215	6.3263
-2.2727	3.7223	15.271	8.4261	13.783	12.096	17.201	1.197	6.2104
-2.2723	3.7165	15.272	8.4072	13.694	12.175	17.365	1.187	6.1488
-2.2719	3.7106	15.272	8.3891	13.606	12.252	17.537	1.1694	6.0693
-2.2715	3.7048	15.272	8.3719	13.519	12.328	17.718	1.1602	6.0083
-2.2711	3.7606	15.267	8.3554	13.435	12.402	17.908	1.1512	5.9469
-2.2707	3.7587	15.266	8.3399	13.351	12.473	18.107	1.1423	5.8852
-2.2703	3.7571	15.265	8.3357	13.306	12.543	18.315	1.1336	5.8233
-2.2699	3.7558	15.263	8.3225	13.229	12.611	18.532	1.125	5.761
-2.2695	3.7547	15.261	8.3102	13.155	12.677	18.757	1.1167	5.6986
-2.2691	3.754	15.259	8.2989	13.083	12.74	18.992	1.1085	5.6361
-2.2687	3.7513	15.257	8.2885	13.015	12.802	19.235	1.1005	5.5735
-2.2683	3.7421	15.255	8.279	12.95	12.861	19.487	1.0927	5.5108
-2.2679	3.7333	15.253	8.2602	12.856	12.918	19.747	1.0852	5.4481
-2.2675	3.72	15.254	8.2532	12.8	12.973	20.015	1.0778	5.3856
-2.2671	3.7121	15.251	8.2471	12.749	13.026	20.291	1.0707	5.3232
-2.2667	3.7046	15.248	8.2419	12.701	13.076	20.575	1.0639	5.261
-2.2663	3.6376	15.25	8.2376	12.657	13.124	20.866	1.0573	5.1992
-2.2659	3.6341	15.247	8.2342	12.617	13.17	21.164	1.0509	5.1378
-2.2655	3.6307	15.243	8.2317	12.582	13.213	21.469	1.0448	5.0768
-2.2651	3.6325	15.249	8.2196	12.522	13.253	21.78	1.039	5.0165
-2.2647	3.6349	15.248	8.2195	12.498	13.292	22.098	1.0335	4.9568
-2.2643	3.6326	15.245	8.2202	12.479	13.327	22.421	1.0282	4.8979
-2.2639	3.6304	15.242	8.2217	12.465	13.36	22.75	1.0233	4.8399
-2.2635	3.6285	15.239	8.224	12.455	13.391	23.083	1.0186	4.783
-2.2631	3.6267	15.236	8.2271	12.451	13.419	23.421	1.0143	4.7271
-2.2627	3.6251	15.233	8.231	12.451	13.444	23.763	1.0102	4.6725
-2.2623	3.6236	15.23	8.2356	12.456	13.487	24.195	1.0148	4.612
-2.2619	3.6224	15.226	8.2409	12.466	13.508	24.55	1.012	4.5598
-2.2615	3.6214	15.222	8.2469	12.481	13.527	24.908	1.0094	4.5092
-2.2611	3.6206	15.218	8.2434	12.508	13.543	25.269	1.0073	4.4605
-2.2607	3.62	15.214	8.2513	12.532	13.557	25.631	1.0055	4.4136
-2.2603	3.6196	15.21	8.2598	12.561	13.568	25.996	1.0041	4.3687
-2.2599	3.6194	15.205	8.2689	12.594	13.549	26.362	1.003	4.3261
-2.2595	3.6199	15.2	8.2786	12.631	13.486	26.729	1.0024	4.2858
-2.2591	3.6207	15.194	8.2887	12.673	13.424	27.097	1.0021	4.2479
-2.2587	3.6218	15.188	8.2993	12.719	13.361	27.465	1.0022	4.2127
-2.2583	3.6231	15.181	8.3103	12.769	13.297	27.832	1.0027	4.1802
-2.2579	3.6246	15.173	8.3217	12.823	13.234	28.198	1.0036	4.1506
-2.2575	3.6216	15.17	8.3335	12.88	13.17	28.563	1.0049	4.124
-2.2571	3.6239	15.161	8.3456	12.941	13.105	28.927	1.0066	4.1005
-2.2567	3.6264	15.152	8.3579	13.005	13.041	29.288	1.0087	4.0803
-2.2563	3.6291	15.142	8.3705	13.072	12.976	29.647	1.0112	4.0634
-2.2559	3.632	15.131	8.3833	13.141	12.91	30.003	1.0141	4.0499
-2.2555	3.6351	15.12	8.3962	13.213	12.845	30.356	1.0174	4.0399
-2.2551	3.6385	15.107	8.4092	13.287	12.779	30.705	1.0211	4.0335
-2.2547	3.6471	15.09	8.412	13.37	12.713	31.049	1.0253	4.0307
-2.2543	3.6512	15.076	8.4258	13.448	12.647	31.389	1.0298	4.0316
-2.2539	3.6507	15.052	8.4394	13.527	12.581	31.724	1.0347	4.0362
-2.2535	3.6556	15.037	8.4529	13.607	12.514	32.054	1.04	4.0444
-2.2531	3.6606	15.022	8.4769	13.681	12.429	32.292	1.0457	4.0563
-2.2527	3.6659	15.006	8.4907	13.763	12.363	32.615	1.0442	4.0409
-2.2523	3.6666	14.98	8.5043	13.845	12.297	32.931	1.0511	4.0629
-2.2519	3.6726	14.962	8.5176	13.928	12.23	33.241	1.0583	4.0882
-2.2515	3.6788	14.944	8.5307	14.01	12.163	33.543	1.0659	4.1168
-2.2511	3.6853	14.926	8.5434	14.093	12.095	33.837	1.0739	4.1486
-2.2507	3.6919	14.906	8.5557	14.175	12.028	34.123	1.0822	4.1834
-2.2503	3.6988	14.887	8.5573	14.256	11.96	34.401	1.0909	4.2212
-2.2499	3.7058	14.866	8.5692	14.337	11.891	34.671	1.0998	4.2619
-2.2495	3.713	14.846	8.5806	14.416	11.823	34.931	1.1091	4.3053
-2.2491	3.7205	14.825	8.5914	14.494	11.754	35.183	1.1187	4.3514
-2.2487	3.7281	14.803	8.5912	14.577	11.684	35.425	1.1286	4.4
-2.2483	3.7359	14.781	8.6012	14.652	11.614	35.658	1.1389	4.4509
-2.2479	3.7391	14.728	8.6105	14.724	11.544	35.881	1.1494	4.504
-2.2475	3.7475	14.708	8.6298	14.803	11.474	36.094	1.1602	4.5592
-2.2471	3.7562	14.688	8.6381	14.872	11.403	36.297	1.1712	4.6163
-2.2467	3.765	14.668	8.6456	14.938	11.332	36.49	1.1825	4.6751
-2.2463	3.774	14.648	8.6522	15.002	11.26	36.672	1.1941	4.7356
-2.2459	3.7831	14.629	8.6579	15.063	11.188	36.843	1.2059	4.7976
-2.2455	3.7924	14.609	8.6626	15.121	11.116	37.003	1.218	4.8608
-2.2451	3.8069	14.584	8.6561	15.168	11.043	37.153	1.2302	4.9253
-2.2447	3.8167	14.565	8.6595	15.22	10.969	37.291	1.2427	4.9907
-2.2443	3.8268	14.547	8.6618	15.27	10.896	37.418	1.2553	5.0571
-2.2439	3.837	14.529	8.663	15.316	10.821	37.534	1.2682	5.1242
-2.2435	3.8474	14.512	8.6631	15.358	10.747	37.638	1.2812	5.1919
-2.2431	3.8579	14.496	8.6726	15.391	10.672	37.731	1.2943	5.26
-2.2427	3.8686	14.481	8.671	15.425	10.596	37.813	1.3076	5.3285
-2.2423	3.8794	14.467	8.6793	15.461	10.52	37.883	1.3291	5.389
-2.2419	3.8903	14.455	8.6657	15.495	10.444	37.941	1.3431	5.4574
-2.2415	3.9014	14.443	8.6619	15.518	10.367	37.988	1.3572	5.5256
-2.2411	3.9126	14.434	8.6569	15.537	10.289	38.023	1.3715	5.5937
-2.2407	3.9239	14.425	8.6507	15.552	10.211	38.047	1.3858	5.6614
-2.2403	3.9404	14.414	8.6433	15.563	10.133	38.059	1.4002	5.7288
-2.2399	3.9522	14.409	8.6347	15.57	10.054	38.059	1.4147	5.7956
-2.2395	3.9642	14.406	8.6249	15.572	9.9748	38.049	1.4216	5.8297
-2.2391	3.9816	14.427	8.6138	15.571	9.895	38.027	1.4367	5.8969
-2.2387	3.9941	14.429	8.6123	15.559	9.8148	37.993	1.4517	5.9632
-2.2383	4.0068	14.434	8.5994	15.548	9.7341	37.949	1.4667	6.0285
-2.2379	4.081	14.435	8.5853	15.534	9.653	37.893	1.4817	6.0927
-2.2375	4.0977	14.444	8.5701	15.515	9.5715	37.826	1.4966	6.1558
-2.2371	4.1147	14.455	8.5537	15.492	9.4895	37.749	1.5115	6.2177
-2.2367	4.1319	14.468	8.5361	15.465	9.4071	37.661	1.5263	6.2783
-2.2363	4.1495	14.484	8.5173	15.433	9.3243	37.562	1.5411	6.3374
-2.2359	4.1675	14.503	8.4875	15.402	9.2411	37.453	1.5557	6.3952
-2.2355	4.1857	14.524	8.4671	15.361	9.1576	37.334	1.5703	6.4514
-2.2351	4.2043	14.547	8.4455	15.317	9.0736	37.205	1.5847	6.5061
-2.2347	4.2232	14.573	8.4228	15.269	8.9894	37.066	1.599	6.5592
-2.2343	4.2424	14.601	8.399	15.216	8.9048	36.917	1.6132	6.6106
-2.2339	4.2619	14.631	8.3742	15.16	8.8198	36.759	1.6272	6.6603
-2.2335	4.2819	14.664	8.3483	15.099	8.6616	36.609	1.6411	6.7082
-2.2331	4.3021	14.699	8.3213	15.035	8.5804	36.432	1.6548	6.7544
-2.2327	4.3227	14.736	8.2934	14.967	8.4987	36.246	1.6683	6.7987
-2.2323	4.342	14.776	8.2645	14.895	8.4165	36.052	1.6816	6.8411
-2.2319	4.3497	14.818	8.2347	14.819	8.334	35.849	1.6947	6.8817
-2.2315	4.3578	14.861	8.2147	14.735	8.251	35.639	1.7075	6.9203
-2.2311	4.3663	14.907	8.1838	14.652	8.1677	35.421	1.7202	6.957
-2.2307	4.375	14.954	8.152	14.566	8.084	35.195	1.7326	6.9918
-2.2303	4.384	15.003	8.1196	14.476	8.0001	34.962	1.7448	7.0246
-2.2299	4.3932	15.054	8.0863	14.383	7.9159	34.722	1.7567	7.0554
-2.2295	4.4027	15.106	8.0525	14.287	7.8315	34.476	1.7764	7.1222
-2.2291	4.4124	15.159	8.0179	14.188	7.747	34.223	1.7882	7.1516
-2.2287	4.4223	15.214	7.9828	14.086	7.6622	33.964	1.7998	7.1791
-2.2283	4.4275	15.275	7.9471	13.982	7.5774	33.7	1.8112	7.2047
-2.2279	4.443	15.359	7.9109	13.875	7.4925	33.429	1.8223	7.2286
-2.2275	4.454	15.418	7.8743	13.765	7.4075	33.154	1.8331	7.2506
-2.2271	4.4651	15.478	7.8268	13.645	7.3225	32.873	1.8436	7.2709
-2.2267	4.4763	15.538	7.7899	13.531	7.2376	32.588	1.8539	7.2895
-2.2263	4.4305	15.605	7.7527	13.415	7.1526	32.299	1.8639	7.3063
-2.2259	4.4453	15.666	7.7152	13.297	7.0678	32.005	1.8736	7.3215
-2.2255	4.4599	15.727	7.6671	13.155	6.9831	31.707	1.883	7.335
-2.2251	4.4743	15.788	7.6403	13.03	6.8986	31.406	1.8921	7.3469
-2.2247	4.4887	15.848	7.6033	12.908	6.8142	31.101	1.9009	7.3572
-2.2243	4.5029	15.909	7.5773	12.778	6.7301	30.794	1.9094	7.366
-2.2239	4.5169	15.969	7.5409	12.653	6.6462	30.483	1.9177	7.3734
-2.2235	4.5259	16.023	7.4943	12.517	6.5626	30.171	1.9256	7.3793
-2.2231	4.5399	16.082	7.4586	12.391	6.5533	29.837	1.9332	7.3839
-2.2227	4.5537	16.141	7.4229	12.263	6.4749	29.518	1.9406	7.3872
-2.2223	4.5673	16.198	7.3874	12.135	6.3972	29.198	1.9476	7.3892
-2.2219	4.5806	16.255	7.352	12.007	6.32	28.876	1.9544	7.39
-2.2215	4.5938	16.31	7.317	11.879	6.2621	28.644	1.9608	7.3896
-2.2211	4.6067	16.364	7.2822	11.75	6.1876	28.325	1.967	7.3882
-2.2207	4.6194	16.416	7.2478	11.622	6.1139	28.006	1.9728	7.3858
-2.2203	4.627	16.439	7.2138	11.494	6.041	27.687	1.9784	7.3825
-2.2199	4.6347	16.495	7.17	11.372	5.9691	27.367	1.9837	7.3782
-2.2195	4.6471	16.543	7.1376	11.246	5.8981	27.047	1.9888	7.3732
-2.2191	4.6592	16.589	7.1162	11.113	5.8281	26.728	1.9935	7.3674
-2.2187	4.6711	16.633	7.0961	10.981	5.7591	26.409	1.998	7.3609
-2.2183	4.6825	16.675	7.0667	10.856	5.6912	26.091	2.0022	7.3538
-2.2179	4.6937	16.715	7.038	10.733	5.6244	25.774	2.0061	7.3462
-2.2175	4.7096	16.779	7.0101	10.612	5.5588	25.458	2.0098	7.338
-2.2171	4.7203	16.816	6.983	10.492	5.4943	25.143	2.0133	7.3295
-2.2167	4.7308	16.85	6.9568	10.375	5.431	24.83	2.0086	7.3296
-2.2163	4.7409	16.882	6.9315	10.259	5.318	24.628	2.012	7.3199
-2.2159	4.7506	16.912	6.9071	10.146	5.2625	24.323	2.0152	7.3101
-2.2155	4.76	16.939	6.8837	10.036	5.2081	24.02	2.0181	7.3
-2.2151	4.7691	16.963	6.8614	9.9281	5.155	23.719	2.0207	7.2899
-2.2147	4.7777	16.985	6.84	9.8233	5.103	23.421	2.0231	7.2798
-2.2143	4.786	17.004	6.8198	9.7215	5.0339	23.126	2.0253	7.2697
-2.2139	4.7939	17.021	6.7905	9.6017	4.9661	22.834	2.0273	7.2597
-2.2135	4.8014	17.035	6.7841	9.5011	4.8995	22.545	2.029	7.2498
-2.2131	4.8086	17.047	6.7793	9.411	4.8343	22.259	2.0305	7.2401
-2.2127	4.8153	17.056	6.7657	9.3238	4.7704	21.976	2.0319	7.2306
-2.2123	4.8216	17.063	6.7533	9.2405	4.7079	21.696	2.033	7.2213
-2.2119	4.8275	17.067	6.7423	9.1611	4.6468	21.42	2.034	7.2124
-2.2115	4.833	17.068	6.7326	9.0858	4.5869	21.148	2.0348	7.2038
-2.2111	4.8334	17.069	6.7242	9.0148	4.5285	20.879	2.0354	7.1955
-2.2107	4.8383	17.065	6.7173	8.948	4.4715	20.614	2.0358	7.1877
-2.2103	4.8428	17.059	6.7117	8.8857	4.4158	20.353	2.0361	7.1803
-2.2099	4.8469	17.051	6.7075	8.8278	4.3616	20.096	2.0363	7.1734
-2.2095	4.8505	17.04	6.7048	8.7745	4.3087	19.843	2.0363	7.1669
-2.2091	4.8536	17.027	6.7035	8.7257	4.2572	19.594	2.0362	7.1609
-2.2087	4.8564	17.012	6.7037	8.6817	4.2072	19.349	2.0359	7.1554
-2.2083	4.8586	16.995	6.7054	8.6423	4.1586	19.108	2.0356	7.1505
-2.2079	4.8604	16.975	6.7085	8.6076	4.1114	18.872	2.0351	7.146
-2.2075	4.8618	16.953	6.7131	8.5777	4.0656	18.64	2.0345	7.1422
-2.2071	4.8626	16.93	6.7192	8.5524	4.0397	18.503	2.0338	7.1388
-2.2067	4.8631	16.904	6.7268	8.5318	3.9979	18.285	2.0331	7.136
-2.2063	4.863	16.877	6.7467	8.5247	3.9576	18.073	2.0322	7.1337
-2.2059	4.8625	16.847	6.7579	8.5145	3.849	17.882	2.0313	7.132
-2.2055	4.8616	16.816	6.7707	8.5089	3.8158	17.678	2.0302	7.1308
-2.2051	4.8601	16.783	6.7849	8.5079	3.7839	17.479	2.0291	7.1301
-2.2047	4.8582	16.749	6.8006	8.5114	3.7532	17.285	2.028	7.13
-2.2043	4.8559	16.713	6.8178	8.5194	3.7238	17.096	2.0267	7.1303
-2.2039	4.853	16.676	6.8473	8.5249	3.6958	16.912	2.0255	7.1312
-2.2035	4.8497	16.637	6.8681	8.5412	3.6691	16.733	2.0241	7.1325
-2.2031	4.846	16.597	6.8905	8.5616	3.6437	16.56	2.0227	7.1343
-2.2027	4.8417	16.556	6.9143	8.5861	3.6197	16.392	2.0213	7.1366
-2.2023	4.837	16.513	6.9395	8.6145	3.5971	16.229	2.0198	7.1393
-2.2019	4.8319	16.47	6.9662	8.6468	3.5758	16.071	2.0182	7.1424
-2.2015	4.8263	16.426	6.9944	8.6828	3.5558	15.919	2.0166	7.1459
-2.2011	4.8202	16.38	7.0239	8.7224	3.5373	15.773	2.015	7.1498
-2.2007	4.8136	16.334	7.0548	8.7655	3.5201	15.631	2.0133	7.154
-2.2003	4.8066	16.287	7.0871	8.8119	3.5044	15.496	2.0116	7.1586
[truncated: 6,000 more rows]

## Sheet: Fig3C
-3	17.578	2.6957	-1.2614	-11.637
-2.9999	6.2358	0.59001	-4.3742	-10.061
-2.9998	-7.9549	-4.4759	-3.3671	-9.3282
-2.9997	-13.062	-2.1464	0.10173	-3.8452
-2.9996	-2.4618	-4.3437	3.2145	7.5175
-2.9995	3.6112	-17.66	7.3242	7.5073
-2.9994	-5.5542	-26.418	-0.38656	9.023
-2.9993	-4.2826	-15.269	-12.41	16.418
-2.9992	4.069	4.7099	-13.357	7.4158
-2.9991	31.85	16.988	-2.6957	7.1004
-2.999	-83.12	21.098	-3.9062	2.6957
-2.9989	-47.485	-0.5188	-1.3529	-0.14242
-2.9988	20.355	-7.1309	4.1707	0.21362
-2.9987	37.974	-9.5927	5.4728	-7.782
-2.9986	21.22	-5.1371	7.2123	-10.284
-2.9985	4.6794	5.2287	5.3304	-7.2021
-2.9984	6.1544	10.986	-3.9266	-1.943
-2.9983	-2.4211	12.349	-10.02	-11.078
-2.9982	4.5471	16.673	-10.63	-14.73
-2.9981	3.9469	10.549	-7.8532	-12.716
-2.998	-17.283	1.6988	0.64087	-10.071
-2.9979	-19.602	-3.9673	4.4759	1.1393
-2.9978	-7.6497	-10.132	8.2296	8.8399
-2.9977	5.778	-8.5042	6.5511	5.2287
-2.9976	7.9447	-6.5816	-8.4839	6.134
-2.9975	4.9642	-5.9509	-10.813	11.576
-2.9974	2.4923	-11.22	-9.5113	-0.68156
-2.9973	0.24414	-4.5878	-19.674	0.39673
-2.9972	3.245	-2.4516	-14.476	-5.6152
-2.9971	9.491	-0.93587	3.418	-6.2459
-2.997	7.0089	-6.5816	20.62	-4.1809
-2.9969	5.4423	0	25.604	2.8992
-2.9968	1.0783	5.9102	27.761	5.8899
-2.9967	5.9102	3.7231	11.983	9.3892
-2.9966	1.9531	2.065	-6.9987	11.068
-2.9965	-16.062	0.47811	-13.163	-0.13224
-2.9964	-27.649	1.2919	-12.136	-3.4993
-2.9963	-21.556	-1.0783	-8.4941	-4.7404
-2.9962	-17.883	-1.3224	-6.8054	-1.3021
-2.9961	0.43742	-4.7709	-17.782	-0.38656
-2.996	10.081	1.7802	-15.31	-2.5431
-2.9959	16.062	6.7647	11.505	-2.6855
-2.9958	18.707	3.9062	18.819	-3.8147
-2.9957	5.8797	2.6957	10.254	-1.3631
-2.9956	-37.354	-7.9854	12.278	-2.2278
-2.9955	-17.527	-12.095	9.5011	-9.5723
-2.9954	7.2021	-9.9284	0.39673	-4.8218
-2.9953	15.828	-4.6082	-11.312	-1.2105
-2.9952	7.5175	7.9447	-18.667	5.6864
-2.9951	-11.627	8.138	-2.2685	5.5542
-2.995	-1.3936	7.1716	-3.0823	0.24414
-2.9949	9.9386	4.3132	-7.9753	2.6652
-2.9948	15.472	7.192	-11.668	0.24414
-2.9947	7.7922	0.73242	-17.08	-2.8483
-2.9946	-35.177	-1.8311	-15.127	4.4454
-2.9945	-18.229	-2.1057	-1.5462	-0.78328
-2.9944	12.899	-3.0823	-3.5095	-7.4565
-2.9943	22.024	-1.0681	-2.9907	-2.828
-2.9942	20.294	-1.6479	5.3507	-3.8961
-2.9941	11.912	-4.2623	9.8267	-5.188
-2.994	8.4229	-2.2786	4.2216	0.77311
-2.9939	9.2061	-4.1911	8.8094	-3.2552
-2.9938	10.122	-7.9346	4.2419	-3.5095
-2.9937	12.604	-8.5754	5.3711	9.9487
-2.9936	-1.8616	-4.9438	9.3384	10.366
-2.9935	-18.341	-0.74259	2.9399	-26.723
-2.9934	-22.38	0.2238	28.605	-18.626
-2.9933	-14.099	4.2826	-9.3486	-10.63
-2.9932	-1.8005	9.1146	-114.74	11.627
-2.9931	-4.2623	0.48828	-14.659	25.309
-2.993	-3.9469	1.3835	47.333	12.349
-2.9929	-6.5918	-4.1606	59.957	-2.5126
-2.9928	-3.2959	-28.697	11.088	9.023
-2.9927	-2.828	-17.598	-10.915	0.33569
-2.9926	-6.3273	3.479	-13.54	-17.344
-2.9925	-6.1544	13.855	-5.3813	-12.665
-2.9924	-12.99	8.8603	2.1261	-2.0345
-2.9923	-13.031	9.0841	5.839	5.6763
-2.9922	1.6785	6.9987	3.6316	15.127
-2.9921	6.4901	4.4047	-4.8726	5.249
-2.992	2.1261	4.3844	-18.545	3.1738
-2.9919	5.8187	0.35604	-20.05	5.0761
-2.9918	14.099	7.7108	-2.0549	0.61035
-2.9917	-4.3437	6.0628	4.0588	4.3132
-2.9916	-35.512	-8.2601	3.1535	7.5378
-2.9915	-44.617	-20.437	-0.97656	-4.9032
-2.9914	-19.725	-11.139	5.6864	-20.091
-2.9913	18.921	1.1495	14.933	-21.962
-2.9912	24.587	7.253	7.8328	-18.89
-2.9911	26.947	8.1991	2.6042	4.13
-2.991	18.921	6.4697	-5.3406	8.1278
-2.9909	7.8227	1.6073	-4.8421	4.6183
-2.9908	4.9438	-2.4516	-5.5237	10.498
-2.9907	9.5418	6.2764	-11.566	10.854
-2.9906	8.5856	3.7231	-3.7638	4.2623
-2.9905	-4.2013	1.9633	5.9408	-1.8921
-2.9904	-24.404	-3.4078	5.9306	-6.6935
-2.9903	-33.447	-1.9735	-1.8311	-6.4392
-2.9902	-19.775	-3.713	-14.16	2.5126
-2.9901	8.4635	-6.8258	-3.6723	0.69173
-2.99	18.097	-5.4423	11.312	0.7019
-2.9899	19.572	-4.1097	13.184	-0.4069
-2.9898	18.982	-2.1464	15.961	-4.9947
-2.9897	6.1137	-0.88501	14.893	-1.6683
-2.9896	1.1088	-4.659	-3.3468	8.3822
-2.9895	-1.3123	-13.316	-16.388	-12.756
-2.9894	-3.4281	-3.6011	-29.724	-23.6
-2.9893	0.49845	7.6294	-27.059	-3.8147
-2.9892	11.302	13.011	-8.8094	6.5918
-2.9891	12.878	-54.708	3.4281	18.178
-2.989	8.4025	-22.359	-1.6174	13.123
-2.9889	0.76294	22.919	4.008	4.9438
-2.9888	-4.9337	28.666	3.7944	1.0376
-2.9887	-0.53914	17.334	-0.78328	4.425
-2.9886	0.91553	10.701	7.4768	-3.0619
-2.9885	-6.2561	1.8717	2.238	-0.28483
-2.9884	3.7028	3.0009	-8.6772	-3.3468
-2.9883	-29.531	-1.4038	-8.1787	-11.932
-2.9882	-75.694	-0.50863	-8.3618	-7.2937
-2.9881	-16.459	-2.299	-1.2716	-6.3985
-2.988	13.428	-3.5299	8.0058	-1.6479
-2.9879	29.836	-3.9164	9.1146	5.9306
-2.9878	22.369	0.95622	9.0434	7.0801
-2.9877	8.901	-3.2959	10.376	-0.43742
-2.9876	1.3224	-4.6997	1.241	2.1159
-2.9875	-5.0557	-4.6997	-3.7638	-2.7771
-2.9874	-6.3985	-1.5869	-5.5644	-9.2265
-2.9873	1.6378	-8.6161	-1.8311	-4.4657
-2.9872	10.325	-13.845	-0.41707	-0.73242
-2.9871	-5.3202	-9.8165	7.0089	2.065
-2.987	-22.451	6.4596	0.061035	5.4423
-2.9869	0.85449	19.786	-4.0181	8.6975
-2.9868	18.392	12.553	-10.925	11.841
-2.9867	16.571	-5.0354	-12.543	4.0181
-2.9866	8.9213	-10.508	-24.394	-0.55949
-2.9865	-6.6732	-10.05	-2.1362	-0.45776
-2.9864	-13.855	-12.004	-2.6957	-4.893
-2.9863	-9.7148	-4.2013	15.706	-5.7271
-2.9862	-13.824	8.0872	37.964	-5.839
-2.9861	-1.2207	9.2977	32.776	-7.192
-2.986	2.655	4.598	21.23	-7.1309
-2.9859	0.32552	9.8063	-7.7515	-8.962
-2.9858	-6.0323	10.64	-34.688	-2.2888
-2.9857	-13.062	-0.67139	-23.794	-2.36
-2.9856	-4.2216	-0.61035	-7.7922	2.1464
-2.9855	-15.066	0.14242	0.13224	-0.13224
-2.9854	-11.373	-1.4547	13.387	-10.569
-2.9853	12.431	3.6825	9.6334	-13.112
-2.9852	17.537	-1.9226	-4.5268	2.9602
-2.9851	12.349	2.9704	2.889	15.177
-2.985	8.0566	2.6957	-4.2928	15.94
-2.9849	10.997	-4.659	-3.2247	18.84
-2.9848	17.069	-5.3711	0.83415	7.9041
-2.9847	2.0142	1.0376	-3.5197	-4.7709
-2.9846	-15.066	2.4618	-7.9142	-0.295
-2.9845	-13.306	-3.5604	-13.814	-2.533
-2.9844	-0.010173	-5.3406	-8.1482	-12.777
-2.9843	3.3671	-15.91	-0.39673	-10.874
-2.9842	11.973	-20.711	-2.8992	-7.3446
-2.9841	3.4993	-2.6042	-23.509	-3.1128
-2.984	-12.665	5.3507	-20.66	0.30518
-2.9839	-8.6365	-0.68156	-2.1261	-9.6334
-2.9838	-13.713	2.2481	15.299	-10.529
-2.9837	-11.912	10.142	21.352	-4.7811
-2.9836	-4.7811	7.1004	17.588	-1.6479
-2.9835	0.030518	4.9438	2.9907	5.5542
-2.9834	13.031	4.2013	-5.7678	12.522
-2.9833	18.565	6.3477	-8.2194	8.3415
-2.9832	13.957	1.18	-5.1066	2.9399
-2.9831	8.8501	0.69173	-0.19328	9.7555
-2.983	0.7019	-2.5024	-1.6785	-1.1495
-2.9829	-7.2327	-8.7687	-3.245	-4.0385
-2.9828	-4.6488	-6.9478	-0.14242	-0.62052
-2.9827	-28.941	-4.5268	1.0071	-3.6825
-2.9826	-41.728	-11.648	3.5909	-1.18
-2.9825	-18.066	-5.6356	1.9226	5.1676
-2.9824	4.4963	-7.5175	2.4109	-2.0142
-2.9823	4.7811	-0.41707	-3.2756	-0.13224
-2.9822	20.376	7.2225	-0.27466	4.5471
-2.9821	30.121	4.6183	0.47811	1.4445
-2.982	27.507	4.8014	0.34587	3.5706
-2.9819	4.3233	7.8227	2.8178	-4.3335
-2.9818	-10.02	5.9306	-1.6378	-6.9885
-2.9817	-4.5064	1.8921	-1.9938	-1.3529
-2.9816	-5.422	-0.19328	-0.61035	-6.0832
-2.9815	-26.143	-6.724	5.9408	-7.3242
-2.9814	-23.305	-6.4901	5.7576	-1.2614
-2.9813	-1.5767	-4.8828	-0.94604	-2.2176
-2.9812	5.5847	-6.9377	2.8788	-11.017
-2.9811	18.717	-3.6112	6.0221	-5.9916
-2.981	15.615	0.2238	9.2367	-1.0376
-2.9809	7.6904	1.0885	-13.295	0.34587
-2.9808	5.0456	1.8921	-29.419	7.7718
-2.9807	12.533	2.3397	-24.577	2.533
-2.9806	8.3211	4.0487	-2.4618	1.8921
-2.9805	-7.3344	0.23397	3.713	3.8249
-2.9804	-10.986	-0.91553	-0.61035	-2.4516
-2.9803	-14.781	1.5462	6.8258	1.1393
-2.9802	-28.737	-1.3224	9.9691	3.8452
-2.9801	-15.208	-0.33569	16.652	-1.4852
-2.98	-4.0588	-3.5807	9.257	-4.2419
-2.9799	-5.4118	-3.184	3.6112	-2.4211
-2.9798	-3.8147	0.25431	0.34587	-4.954
-2.9797	18.575	-3.2043	-6.897	-3.6519
-2.9796	24.75	-6.3578	-16.256	-0.89518
-2.9795	10.315	-4.2725	-10.579	-1.9735
-2.9794	3.5502	0.95622	-7.5785	-3.6214
-2.9793	-1.8616	-1.9938	-1.6785	-8.1787
-2.9792	4.8218	-1.5462	-3.774	-3.4892
-2.9791	7.3751	-1.2207	-0.071208	6.2459
-2.979	5.2795	-2.4923	-5.422	5.188
-2.9789	-4.0894	-2.4923	-13.529	2.3905
-2.9788	-8.2499	1.6581	-3.1331	5.8695
-2.9787	-11.251	2.9602	3.5706	1.4852
-2.9786	-7.3344	7.2937	-0.08138	1.3428
-2.9785	-0.071208	5.5542	3.0619	7.0292
-2.9784	1.1393	3.7537	5.2287	5.0964
-2.9783	-15.991	6.8665	13.387	-2.5431
-2.9782	-21.23	3.8961	6.0933	-7.7209
-2.9781	-12.258	-3.2552	-2.0142	-9.8368
-2.978	-1.2207	-11.342	-1.9633	-9.0332
-2.9779	-3.7333	-4.4047	-5.8899	-0.72225
-2.9778	-0.38656	2.4109	-4.9744	-0.89518
-2.9777	-6.5613	1.5666	0.32552	3.2857
-2.9776	8.4534	-15.828	-3.6418	10.02
-2.9775	9.4299	-14.618	-7.192	3.8961
-2.9774	14.791	-4.8319	-1.4038	-2.9602
-2.9773	14.201	10.61	-4.3945	-10.264
-2.9772	14.903	12.97	-1.5666	-10.152
-2.9771	3.9368	9.3689	14.659	-1.9633
-2.977	-10.376	10.335	14.832	3.0823
-2.9769	-10.691	8.0058	-2.9806	8.0668
-2.9768	-2.9093	9.1146	-21.922	7.3344
-2.9767	8.1991	-1.5564	-16.073	6.7139
-2.9766	8.2804	-3.123	4.3945	0.38656
-2.9765	-26.652	-6.8868	13.082	-3.0212
-2.9764	-25.889	-9.1756	-1.8921	-1.18
-2.9763	-6.4596	-6.7139	-4.5776	0.98674
-2.9762	5.4728	-2.6143	2.004	-5.0761
-2.9761	18.27	-4.0487	-3.8961	-5.8695
-2.976	0.57983	-3.6621	3.2145	-18.575
-2.9759	-11.22	-9.5011	-0.14242	-25.116
-2.9758	-2.3193	-15.177	-13.377	-7.1411
-2.9757	13.499	-10.783	-11.058	9.023
-2.9756	17.995	-2.8788	-0.94604	19.073
-2.9755	5.9611	-0.13224	-1.1902	27.649
-2.9754	-3.6621	0.99691	6.9682	19.236
-2.9753	4.1402	1.1698	4.13	6.1646
-2.9752	5.2592	7.1208	4.5268	0.98674
-2.9751	-1.8819	8.5347	11.454	-3.0111
-2.975	-5.3406	4.2521	2.9704	-2.8992
-2.9749	-5.1066	-1.5666	1.6683	-9.2265
-2.9748	1.1393	-3.6316	-2.8483	-35.899
-2.9747	2.1362	-1.4038	0.59001	-26.011
-2.9746	-2.4923	0.49845	-2.8992	1.5259
-2.9745	-9.3892	6.9071	-2.828	20.192
-2.9744	-9.0129	6.5918	-1.2614	20.844
-2.9743	-6.2866	-1.0681	-3.5095	9.1044
-2.9742	-9.2468	-3.0111	-6.9478	-0.89518
-2.9741	-11.261	1.6785	-8.5653	-6.2663
-2.974	-4.4047	-4.8014	-9.0637	-6.0018
-2.9739	2.8992	-4.2114	-2.4312	-18.26
-2.9738	-0.74259	-6.8258	-0.04069	-15.594
-2.9737	2.0447	-6.0323	2.0955	-1.8209
-2.9736	-0.52897	-3.0518	9.3689	-0.68156
-2.9735	0.38656	5.2897	12.207	5.8289
-2.9734	10.559	8.1584	-14.913	7.4565
-2.9733	13.55	4.9235	-10.366	4.4759
-2.9732	2.2888	0.24414	-1.241	9.1654
-2.9731	-0.17293	-4.3742	2.9907	8.372
-2.973	-5.422	-14.76	2.6042	-12.014
-2.9729	0.10173	-9.6741	3.4688	-15.137
-2.9728	2.9704	-1.0274	0.76294	-4.2521
-2.9727	4.6488	3.4688	-0.25431	-1.1698
-2.9726	-0.89518	6.9682	-6.0323	7.5785
-2.9725	-7.9041	4.7302	-6.5002	9.5113
-2.9724	-2.1769	-5.6966	-1.2919	7.3751
-2.9723	1.9023	-7.5175	5.6661	6.9275
-2.9722	-4.0283	-3.0823	3.4688	1.4242
-2.9721	-4.364	2.0854	6.1951	-3.5299
-2.972	2.1566	6.9173	-0.010173	1.709
-2.9719	3.8656	12.492	-0.80363	2.004
-2.9718	5.1982	8.2499	4.7506	4.069
-2.9717	-3.6112	5.5033	-4.2318	9.2061
-2.9716	-14.567	1.0986	-12.339	0.74259
-2.9715	-10.203	0.19328	-11.993	-2.1362
-2.9714	-0.26449	-1.8819	-15.462	-3.9876
-2.9713	4.2419	-5.1371	-5.5644	-7.4666
-2.9712	1.0376	-5.2389	5.8594	-5.2694
-2.9711	3.3366	-6.2154	12.37	-4.2928
-2.971	5.778	-8.4635	-1.3224	-4.3742
-2.9709	-0.48828	-5.9204	-26.784	-9.9386
-2.9708	-5.7373	-6.012	-17.904	-11.485
-2.9707	-2.8585	-4.069	-0.08138	-5.2694
-2.9706	-0.69173	-2.3092	18.728	-5.7983
-2.9705	-0.53914	-1.1597	20.772	-2.5635
-2.9704	4.4047	3.8961	22.349	6.7952
-2.9703	3.6316	4.3742	18.148	11.759
-2.9702	-6.0323	6.2663	-20.426	13.468
-2.9701	4.8014	2.7974	-29.917	14.74
-2.97	-8.5144	0.5188	-13.123	-17.1
-2.9699	-9.7555	0.53914	2.9806	-10.813
-2.9698	6.8461	-0.32552	11.759	1.8209
-2.9697	8.9823	-3.6214	17.975	10.569
-2.9696	12.38	0.08138	14.231	7.6294
-2.9695	4.0487	-0.55949	7.1004	1.4343
-2.9694	7.2632	0.7019	-2.0142	4.3132
-2.9693	-0.90535	-1.1597	-10.335	-2.1667
-2.9692	-4.9235	-0.7019	-5.839	-9.9182
-2.9691	-10.742	4.0283	-4.3335	-5.7068
-2.969	-2.1261	-3.2654	-4.8319	-8.4941
-2.9689	-3.54	-9.2672	-7.5785	-9.2977
-2.9688	-4.1199	-8.372	-5.5542	-5.5847
-2.9687	-5.778	-6.3883	-0.96639	-2.2685
-2.9686	-7.5277	-1.8209	5.7678	-3.3366
-2.9685	2.7771	3.0924	3.4281	0.20345
-2.9684	15.238	3.1331	-7.6701	-1.9124
-2.9683	19.999	6.012	-9.9589	1.9124
-2.9682	6.429	8.7484	-11.607	-7.8125
-2.9681	0.38656	6.1849	5.839	-3.5197
-2.968	-15.727	-0.04069	17.883	5.7475
-2.9679	-28.269	-3.479	13.214	9.257
-2.9678	-10.539	-10.518	-2.4312	10.091
-2.9677	4.2318	-10.356	0.17293	1.4547
-2.9676	8.6873	-5.1371	-0.18311	-2.4414
-2.9675	7.8939	2.7364	-0.32552	6.4189
-2.9674	-10.539	0.9257	1.5055	2.4719
-2.9673	-23.875	7.253	-2.8381	-3.1738
-2.9672	-26.55	5.188	-4.4963	-2.9602
-2.9671	-10.478	2.7262	-3.9469	-1.4954
-2.967	-4.425	2.1362	-8.7484	-1.0783
-2.9669	13.265	0.77311	-14.099	-0.15259
-2.9668	18.382	0.26449	-13.967	-0.061035
-2.9667	13.285	-1.5564	-4.0283	-4.3538
-2.9666	9.5927	-3.418	4.7811	-2.0345
-2.9665	6.8868	-4.893	2.5126	-0.68156
-2.9664	8.7077	-8.5449	-6.7647	5.0659
-2.9663	-0.57983	-1.1495	-3.9571	0.7019
-2.9662	-38.574	2.1464	2.4312	-1.2614
-2.9661	-33.966	2.7873	0.33569	1.3733
-2.966	0.050863	2.2074	8.6568	0.050863
-2.9659	19.969	-2.4109	15.818	-1.3631
-2.9658	18.28	-9.3689	12.655	2.2888
-2.9657	12.594	-11.515	-10.966	1.0173
-2.9656	9.0332	-9.1858	-10.325	1.5666
-2.9655	-1.8819	-2.5838	-26.367	1.7497
-2.9654	-6.663	5.6458	-14.638	-0.59001
-2.9653	-2.5228	6.3477	7.782	-2.533
-2.9652	0.45776	5.7882	25.96	-3.6926
-2.9651	13.133	-2.6143	30.68	-7.4565
-2.965	1.0681	1.6988	13.997	-9.5622
-2.9649	-2.2685	4.069	-8.0058	-3.2043
-2.9648	2.8381	4.9642	-13.967	-0.59001
-2.9647	9.8979	4.659	-5.8594	-3.3366
-2.9646	14.292	3.9978	-7.5073	-2.3092
-2.9645	7.4565	2.2278	-12.309	-6.1035
-2.9644	-22.074	3.0823	-5.2083	-7.1513
-2.9643	-21.016	-3.2145	-9.3282	-8.5551
-2.9642	-20.467	-10.559	-14.872	-9.1553
-2.9641	1.4954	-13.275	-1.6581	-7.0699
-2.964	10.081	-9.023	9.3079	1.3021
-2.9639	10.071	-3.245	5.1168	5.0049
-2.9638	-0.4069	11.607	0.61035	3.6418
-2.9637	-6.4596	9.9386	-0.04069	4.7607
-2.9636	-6.0221	3.8961	-2.7974	7.3344
-2.9635	-0.83415	4.9032	1.8514	14.018
-2.9634	-3.3671	4.2623	4.4963	12.4
-2.9633	-0.66121	3.5909	-24.943	9.6639
-2.9632	-2.6143	2.7466	-17.008	7.9956
-2.9631	4.9337	-6.2358	9.257	3.5807
-2.963	4.9947	-12.39	31.748	-2.6855
-2.9629	-0.31535	-6.1951	26.754	-2.6855
-2.9628	0.90535	-7.3649	12.054	-10.03
-2.9627	7.9956	-4.6082	-11.424	-8.0872
-2.9626	8.2804	-0.071208	-17.212	-4.0181
-2.9625	7.2021	1.2512	-10.579	-8.0566
-2.9624	-19.104	-1.8616	-7.314	-6.602
-2.9623	-17.548	1.2919	-6.5104	-7.9753
-2.9622	-0.020345	3.5604	-0.75277	-10.03
-2.9621	0.84432	8.1075	10.173	-5.0151
-2.962	2.4007	9.318	4.4047	4.3437
-2.9619	-29.602	11.119	-3.2654	12.39
-2.9618	-42.165	-11.566	-8.3516	8.7891
-2.9617	-0.93587	-15.808	-16.378	-9.2468
-2.9616	35.105	-8.7789	-12.512	-9.3892
-2.9615	63.527	-1.4445	-2.0955	5.1371
-2.9614	38.289	1.8209	-2.7669	7.0801
-2.9613	-89.539	5.544	-6.1137	7.4463
-2.9612	-23.946	9.7758	5.7271	8.7077
-2.9611	30.162	7.7515	8.3516	3.9673
-2.961	23.57	-3.6621	9.3384	2.2583
-2.9609	21.139	-4.2826	7.1716	-8.4534
-2.9608	13.56	-5.8187	-1.2105	-16.103
-2.9607	17.375	-4.3335	-4.1097	-7.8227
-2.9606	10.986	0.4069	-5.3813	-1.0885
-2.9605	-4.6488	4.9845	-11.882	0.061035
-2.9604	-8.6466	0.82397	-4.2826	3.0823
-2.9603	-30.64	-0.14242	7.2225	1.119
-2.9602	-39.714	-5.2083	9.8267	1.0173
-2.9601	-21.434	-6.307	20.457	-0.17293
-2.96	1.7395	-10.925	16.785	-0.091553
-2.9599	12.899	-11.271	7.6701	-4.8014
-2.9598	15.889	-3.9978	-6.8868	1.6785
-2.9597	7.9142	-3.0924	-11.515	3.9978
-2.9596	-11.953	-12.37	-9.7046	3.7638
-2.9595	-19.145	0.061035	-2.2583	3.5807
-2.9594	-24.078	8.2194	1.2512	1.4343
-2.9593	-6.2154	7.7616	-18.219	-2.6754
-2.9592	9.7453	4.5166	-23.56	1.9328
-2.9591	12.512	6.2866	-11.312	0.38656
-2.959	7.8735	8.5042	-1.9938	-9.0535
-2.9589	8.138	8.5449	9.3486	-1.2207
-2.9588	4.1809	2.8788	10.976	-4.13
-2.9587	-3.123	0.94604	24.048	-6.6732
-2.9586	-11.556	6.3273	27.74	-1.7395
-2.9585	-9.7453	5.1778	-68.42	-0.26449
-2.9584	3.8249	-13.316	-46.672	-4.0385
-2.9583	2.1871	-20.813	13.57	0.4069
-2.9582	-1.2817	-15.625	35.258	1.8311
-2.9581	-2.0752	-11.953	23.997	-7.843
-2.958	2.36	-3.5706	-12.563	-11.8
-2.9579	4.6285	7.0089	-20.457	-6.8563
-2.9578	8.8603	5.6051	5.4321	-1.3224
-2.9577	-5.9306	9.1553	6.6325	12.36
-2.9576	-10.356	6.6121	-9.7555	19.806
-2.9575	-6.2154	4.1606	2.3397	13.865
-2.9574	-6.4494	-11.587	8.7687	-7.0292
-2.9573	-4.8523	-8.5958	26.326	-11.414
-2.9572	6.4697	0.66121	39.836	-2.4821
-2.9571	8.138	10.457	-54.565	7.6803
-2.957	4.8014	4.7506	-63.741	9.1858
-2.9569	2.8076	8.6568	2.5126	-6.3782
-2.9568	-1.0986	9.6436	7.6803	-7.3954
-2.9567	-4.0588	0.25431	-3.6621	-9.8775
-2.9566	-14.231	-9.8877	0.78328	-8.0261
-2.9565	-7.3039	-3.6723	13.153	4.425
-2.9564	10.213	-7.7616	19.348	9.5113
-2.9563	7.5175	-4.2419	21.779	9.786
-2.9562	-5.422	2.4516	14.394	6.6833
-2.9561	-2.7059	0.18311	3.3061	8.077
-2.956	-4.2725	1.3123	-6.2358	1.0783
-2.9559	4.6082	3.3264	-1.1698	-9.6537
-2.9558	7.1818	2.2074	-4.6285	-8.4127
-2.9557	10.254	-3.2247	-8.3211	-5.4016
-2.9556	9.7758	-6.9682	2.4719	-0.53914
-2.9555	-0.59001	-16.032	-5.8695	-3.9775
-2.9554	-4.8726	-9.318	-11.007	-3.2959
-2.9553	-0.61035	3.2552	-3.4892	-2.9195
-2.9552	2.5736	2.36	4.6895	-1.2105
-2.9551	1.8819	4.4963	-9.0027	6.4901
-2.955	-4.5675	0.94604	-4.2928	1.2817
-2.9549	-23.397	-0.67139	-2.5431	4.2623
-2.9548	-7.0597	-3.6825	-10.071	1.3224
-2.9547	4.8523	-3.2857	-4.4963	-0.42725
-2.9546	-9.6741	1.8412	5.3101	0.96639
-2.9545	-21.159	7.5378	6.2663	-4.0894
-2.9544	10.01	4.6183	6.429	-3.7231
-2.9543	19.491	3.54	4.7201	-9.3689
-2.9542	6.073	-1.0478	1.5259	-2.004
-2.9541	1.0173	-4.1606	-3.7842	1.475
-2.954	6.0425	-2.5838	-7.548	-1.77
-2.9539	7.6803	-6.2866	-7.8023	1.3428
-2.9538	6.5613	-8.8196	-8.433	6.5613
-2.9537	0.030518	-11.139	-2.7771	2.2176
-2.9536	-2.3702	-1.5666	3.9368	1.2309
-2.9535	-0.091553	0.32552	5.7882	4.8828
-2.9534	-2.7669	3.0212	1.0885	0.90535
-2.9533	-3.6418	11.505	-3.5095	3.5909
-2.9532	-1.0478	7.7311	-1.6683	7.3446
-2.9531	5.1575	7.9651	-7.9956	0.84432
-2.953	8.9518	-11.597	-3.1331	-26.896
-2.9529	5.0761	-12.98	6.4901	-24.292
-2.9528	-6.724	6.012	5.7475	-10.742
-2.9527	-9.4198	13.529	13.59	2.7568
-2.9526	-8.5246	7.5073	15.177	6.9682
-2.9525	-6.7139	6.7139	14.211	-3.8859
-2.9524	-10.986	-4.2419	19.592	-17.975
-2.9523	-4.13	-5.1066	-3.9673	-13.153
-2.9522	8.8908	-1.3224	-34.322	-3.123
-2.9521	3.1942	0.43742	-44.362	11.749
-2.952	0.94604	-9.4401	-24.333	16.256
-2.9519	-5.127	-13.387	2.6042	13.234
-2.9518	-0.83415	-3.8147	10.539	22.837
-2.9517	-16.134	0.94604	4.6387	20.243
-2.9516	-3.5299	4.2725	-0.061035	8.9417
-2.9515	9.3384	4.1097	12.105	1.5869
-2.9514	-8.728	4.3538	-0.67139	-3.2857
-2.9513	-8.3618	3.2552	3.4078	-6.1951
-2.9512	0.68156	4.1097	-2.1566	-3.0009
-2.9511	14.262	6.2052	-23.234	-4.7607
-2.951	14.15	11.444	-17.822	-6.0425
-2.9509	7.9244	-12.594	6.0832	-3.9368
-2.9508	-3.9368	-26.927	19.277	-9.6334
-2.9507	4.9235	-14.465	21.556	-9.786
-2.9506	-2.4821	3.4078	12.288	-12.716
-2.9505	-2.9907	12.41	2.0142	-26.55
-2.9504	-11.21	8.0973	2.004	-3.7842
-2.9503	-25.97	3.3875	1.0478	49.825
-2.9502	-15.218	-2.1159	2.1261	10.223
-2.9501	0.35604	1.8514	-10.671	-16.083
-2.95	1.0681	-6.7647	-27.629	-10.976
-2.9499	-2.0345	-12.583	-1.0376	1.9124
-2.9498	10.345	-6.2154	16.429	6.3985
-2.9497	13.824	-0.08138	12.075	9.6842
-2.9496	22.471	3.3061	1.4343	10.152
-2.9495	30.212	8.5144	-7.843	-7.4768
-2.9494	-37.394	8.7077	-6.5511	-28.544
-2.9493	-64.189	3.5807	-8.4229	-25.085
-2.9492	-0.1119	1.2004	-0.7019	4.5675
-2.9491	19.745	-4.4861	-1.9938	15.635
-2.949	-0.77311	-10.356	-3.5604	14.638
-2.9489	-13.936	-6.7037	-2.4007	8.0465
-2.9488	8.2906	-3.6825	0.77311	-0.75277
-2.9487	28.931	-0.34587	-0.79346	-8.9213
-2.9486	22.247	-1.4648	0.32552	-3.6112
-2.9485	-1.709	-5.5745	3.2654	5.5542
-2.9484	-4.5675	-3.4587	1.0376	5.7678
-2.9483	1.18	5.3507	-4.13	-11.871
-2.9482	2.9399	4.0995	-7.8735	-33.498
-2.9481	6.429	5.8594	-13.367	-16.144
-2.948	7.6192	6.3883	-8.4432	10.712
-2.9479	-0.020345	4.598	-4.2216	22.512
-2.9478	-3.5909	2.065	-2.8687	21.159
-2.9477	-7.3649	2.3193	-4.13	2.7771
-2.9476	-5.2185	-1.4852	2.1667	-2.8788
-2.9475	-5.3609	-0.4069	5.8695	-2.5228
-2.9474	-21.962	-7.3446	10.101	-9.0841
-2.9473	-19.806	-5.188	4.364	-8.4839
-2.9472	-5.7882	-4.3844	2.5838	-2.8788
-2.9471	3.2654	-5.9306	3.8249	1.5462
-2.947	9.6436	-4.303	1.0885	-6.3985
-2.9469	9.0535	6.2561	-4.8319	-7.0292
-2.9468	8.1889	7.5378	-2.8178	5.7882
-2.9467	15.076	2.8381	7.9142	6.602
-2.9466	20.04	-2.9806	-3.8045	5.4423
-2.9465	-94.096	-2.5431	-25.391	10.915
-2.9464	-49.164	-11.871	-8.9823	1.2105
-2.9463	31.687	-5.4728	21.077	-39.978
-2.9462	53.009	-13.499	30.151	-27.456
-2.9461	44.586	-9.0942	21.8	-3.835
-2.946	15.635	-4.2725	-91.787	10.427
-2.9459	1.2105	0.25431	-34.17	18.789
-2.9458	-3.0721	6.4189	28.676	17.354
-2.9457	-2.9297	5.4423	31.952	15.686
-2.9456	-1.8209	4.2114	26.255	11.515
-2.9455	0.88501	2.7974	13.906	-0.86466
-2.9454	-22.41	6.7444	-0.21362	-6.3477
-2.9453	-18.789	3.1331	-31.26	-4.5776
-2.9452	-13.295	3.8147	-28.941	-1.9226
-2.9451	-5.127	1.8311	-12.889	-1.3733
-2.945	7.4972	-7.0496	4.7811	-1.7293
-2.9449	3.4281	-3.5502	17.873	-3.9266
-2.9448	6.3985	-1.6479	21.281	-6.3782
-2.9447	2.7262	-3.418	10.773	-3.5604
-2.9446	-2.1057	4.2928	0.71208	-8.5958
-2.9445	-4.9947	1.0071	-7.0089	-1.2004
-2.9444	-7.8634	-0.26449	-6.7342	-1.6479
-2.9443	-10.203	3.1331	-10.895	-2.4312
-2.9442	-6.8665	0.295	-11.993	6.9071
-2.9441	-5.8492	-1.2309	-3.3569	8.2092
-2.944	-6.4494	-0.20345	3.9368	-7.1309
-2.9439	1.5462	-1.9633	2.1566	-11.373
-2.9438	11.434	-3.6112	-1.2309	-4.5166
-2.9437	8.5347	-1.2614	-2.95	-2.6042
-2.9436	-1.2207	-4.5166	-5.3202	3.3569
-2.9435	-2.36	-5.2389	-10.417	5.0761
-2.9434	-2.4821	-6.8461	-11.363	6.012
-2.9433	-5.1371	-7.0292	-7.0903	9.0739
-2.9432	-1.2512	-0.44759	-2.6347	4.3538
-2.9431	-1.5666	5.3101	6.6528	0.16276
-2.943	-5.2389	2.9704	11.719	2.5736
-2.9429	-13.245	3.6926	15.035	-1.6378
-2.9428	-9.7249	2.533	19.531	-9.4401
-2.9427	3.8656	1.1597	16.815	-6.8563
-2.9426	12.4	0.85449	0.04069	-10.661
-2.9425	11.403	-2.6449	-28.88	-9.786
-2.9424	10.254	-7.4768	-16.713	-4.069
-2.9423	2.7771	1.3326	-3.0009	-5.0456
-2.9422	-2.6245	4.8014	-3.123	-0.10173
-2.9421	-15.645	2.9093	-3.2145	12.767
-2.942	-20.121	0.32552	-0.4069	9.3994
-2.9419	-6.2764	-0.67139	6.5206	3.2247
-2.9418	6.9478	-1.3123	6.3375	8.962
-2.9417	9.8775	0.21362	0.14242	-0.30518
-2.9416	9.0027	2.9806	-1.2716	-2.4312
-2.9415	-2.5126	8.4941	2.7364	1.9124
-2.9414	-3.418	2.1362	-3.6723	-0.62052
-2.9413	-9.6842	-11.973	-7.3954	-3.4688
-2.9412	-6.4799	-25.523	-4.4556	1.9633
-2.9411	4.3945	-21.749	-5.2389	-3.0111
-2.941	9.0434	1.0071	2.238	1.3631
-2.9409	7.9041	10.925	3.9062	1.9226
-2.9408	5.9204	7.3547	4.0181	-5.8289
-2.9407	17.069	-7.3242	-0.87484	-1.5259
-2.9406	25.472	-14.547	6.9784	-4.2623
-2.9405	5.0863	7.019	10.874	-8.6365
-2.9404	-109.58	11.403	4.1911	-2.4719
-2.9403	-32.674	12.431	-1.5666	-2.4516
-2.9402	44.464	11.688	-0.28483	-0.38656
-2.9401	29.399	6.3883	2.7466	4.2725
-2.94	19.267	2.7262	0.62052	4.3335
-2.9399	12.004	1.119	-5.7271	-3.4281
-2.9398	14.659	-0.96639	-6.012	-1.9836
-2.9397	6.8868	-1.0274	-6.0323	-1.9735
-2.9396	-5.5033	-1.5055	-8.6975	-1.4445
-2.9395	-4.7811	-14.954	-1.7293	2.7364
-2.9394	1.0071	-20.253	-3.9368	4.9133
-2.9393	3.6316	-7.6599	-5.8187	3.1738
-2.9392	-11.617	6.134	-15.615	6.0221
-2.9391	-13.418	11.8	-19.643	-0.78328
-2.939	1.3631	-7.4463	-3.6926	-3.7842
-2.9389	-0.97656	-19.379	15.381	2.594
-2.9388	-42.155	-7.1106	15.554	-0.86466
-2.9387	-32.847	6.8766	12.492	-1.6581
-2.9386	2.8483	4.5675	0.7019	1.5666
-2.9385	21.769	0.6307	-9.9996	-2.2278
-2.9384	31.036	4.2419	-5.0659	1.2919
-2.9383	23.59	7.0801	0.4069	4.6692
-2.9382	12.41	7.7108	-1.9023	-1.119
-2.9381	1.1495	12.96	-4.4149	-1.8819
-2.938	-1.2919	10.213	-8.2092	1.6378
-2.9379	-2.4312	-8.8298	-5.483	-3.479
-2.9378	-10.986	-5.5135	-6.6223	-5.6458
-2.9377	-8.1482	2.2278	-12.828	-2.0955
-2.9376	-0.4069	-9.1146	-12.41	-10.824
-2.9375	-8.2194	-15.493	-6.2663	-11.79
-2.9374	-6.1035	-10.162	1.6378	-8.4025
-2.9373	0.82397	2.36	7.7718	2.3804
-2.9372	-5.0151	9.5113	7.2021	10.59
-2.9371	-7.8939	5.422	11.088	12.746
-2.937	-9.1044	3.2247	8.5449	9.8877
-2.9369	-18.036	9.0841	5.4423	3.4078
-2.9368	1.77	5.778	4.1097	4.7709
-2.9367	15.381	-0.42725	5.2999	-10.071
-2.9366	13.845	-1.475	5.0354	-7.5378
-2.9365	14.608	-5.3101	3.4383	-3.1026
-2.9364	4.5776	-8.7687	-4.0995	-4.598
-2.9363	1.4547	-11.78	-18.504	0.030518
-2.9362	-2.4618	-8.5246	-12.146	-5.9713
-2.9361	3.7435	-6.6833	7.2937	-10.783
-2.936	-8.1787	0.16276	15.045	3.245
-2.9359	-28.707	3.3671	21.108	9.4401
-2.9358	-19.969	-0.93587	12.604	8.8908
-2.9357	2.8178	-3.5095	-29.205	6.9275
-2.9356	3.4485	0.82397	-21.8	3.5502
-2.9355	-0.49845	-4.069	0.73242	-1.4954
-2.9354	5.8899	-1.414	-1.2105	-5.188
-2.9353	10.01	4.13	-6.5206	-6.4697
-2.9352	12.797	6.7342	-4.303	-9.0637
-2.9351	9.7758	8.2092	-1.5564	-3.6214
-2.935	3.4688	6.6833	-5.6763	2.2074
-2.9349	-8.1991	4.8014	-15.025	2.0142
-2.9348	-10.966	1.5361	2.5838	0.82397
-2.9347	-6.3883	-1.8717	19.246	0
-2.9346	-0.050863	-5.4728	17.283	-5.544
-2.9345	-2.1769	-6.958	8.7484	2.004
-2.9344	-5.8695	-3.7028	7.3751	-3.9368
-2.9343	-10.437	-5.6661	-0.30518	-9.4401
-2.9342	-8.433	-0.49845	-0.48828	2.4211
-2.9341	0.57983	0.53914	2.7262	3.6214
-2.934	-0.55949	0.62052	-5.6152	-21.688
-2.9339	-1.2716	-0.28483	-19.409	-23.061
-2.9338	-2.7262	-3.713	-19.216	-6.602
-2.9337	6.2663	-6.6223	-12.889	5.0557
-2.9336	4.9845	-6.1137	-4.8523	15.554
-2.9335	1.5971	-0.08138	7.3853	14.882
-2.9334	5.4932	8.3211	6.897	9.4604
-2.9333	2.6855	8.9518	22.308	3.3468
-2.9332	1.4343	-4.0588	50.466	-16.235
-2.9331	-20.376	-15.116	-24.821	-11.8
-2.933	-33.264	-6.1849	-97.768	6.4494
-2.9329	-15.137	1.7192	-12.054	8.1991
-2.9328	3.8757	9.3384	39.825	5.3202
-2.9327	18.27	7.8939	38.422	0.23397
-2.9326	18.056	0.21362	3.3366	-5.4016
-2.9325	4.7811	-1.8819	-6.602	-6.7647
-2.9324	10.834	-7.782	0.33569	-0.34587
-2.9323	14.323	-6.7952	0.80363	3.2145
-2.9322	12.838	-5.8492	2.4109	7.487
-2.9321	9.4808	-5.717	3.54	16.693
-2.932	1.241	-5.7271	-2.7669	8.1278
-2.9319	-7.7718	3.6316	-3.2857	4.1504
-2.9318	-6.4697	7.5378	-4.2216	9.4299
-2.9317	-2.3193	6.6528	-7.6701	-1.2512
-2.9316	21.342	3.7435	-5.3101	-7.5887
-2.9315	-74.371	5.8085	-9.5927	-8.0668
-2.9314	-60.699	5.6559	-1.1292	-16.052
-2.9313	25.757	0.34587	4.3335	-7.8328
-2.9312	47.434	0.72225	-6.073	1.1698
-2.9311	38.34	4.6692	-2.065	-6.2663
-2.931	20.894	2.7364	2.1667	-9.7961
-2.9309	7.3954	-4.4352	-1.5666	-5.483
-2.9308	-4.6488	-6.3171	-7.7718	-6.3375
-2.9307	-18.921	-4.3945	-16.337	-3.8045
-2.9306	-24.424	-3.6723	-22.695	-3.1535
-2.9305	-8.2804	-6.2052	-17.578	2.6042
-2.9304	6.0832	-7.7108	6.7749	6.4901
-2.9303	1.2105	-1.0376	21.932	-1.6479
-2.9302	4.5268	1.6073	30.996	-7.6803
-2.9301	-5.1371	2.1667	28.432	3.774
-2.93	-12.146	0.5188	11.709	7.3751
-2.9299	0.80363	-0.23397	-0.67139	8.2296
-2.9298	-1.0885	-4.0995	-7.1818	2.4923
-2.9297	-1.9531	-0.96639	-11.82	-1.5767
-2.9296	-3.8656	-1.414	-17.405	-2.7771
-2.9295	-3.1026	0.87484	-11.23	5.4423
-2.9294	5.2694	-3.3468	-4.4149	6.307
-2.9293	12.553	2.7873	-1.2004	-2.9907
-2.9292	15.706	2.8381	0.08138	-5.127
-2.9291	28.788	3.7842	12.288	-12.899
-2.929	-5.1066	1.0986	22.502	-5.5237
-2.9289	-93.526	-0.46794	-72.611	0.62052
-2.9288	-0.091553	3.6418	-31.189	-1.4648
-2.9287	26.357	-0.010173	17.944	0.35604
-2.9286	-39.134	1.9226	27.384	7.1513
-2.9285	-16.795	-8.1787	16.836	-0.95622
-2.9284	21.037	-7.0496	6.8258	-3.3569
-2.9283	34.403	-1.4852	4.069	1.0885
-2.9282	33.752	-2.7466	6.0832	3.0721
-2.9281	16.398	-3.7944	3.3976	2.5635
-2.928	-4.6387	-1.7192	-21.383	0.90535
-2.9279	-6.3883	3.8045	-32.216	-6.1646
-2.9278	-10.579	1.4445	-19.623	1.5361
-2.9277	-19.745	2.3092	4.2521	3.9368
-2.9276	-7.6701	1.6378	22.573	2.6957
-2.9275	2.2685	-0.18311	13.652	-0.68156
-2.9274	12.36	-10.132	-0.19328	-17.069
-2.9273	6.1849	-8.311	3.9164	-18.361
-2.9272	-24.831	-5.839	1.5462	-10.122
-2.9271	-25.574	2.9907	4.2826	11.119
-2.927	-5.1371	2.5635	7.6294	19.104
-2.9269	9.4198	4.4454	13.082	10.64
-2.9268	12.085	0.17293	8.8908	8.7789
-2.9267	14.801	-4.7506	-23.183	-4.6895
-2.9266	4.8421	-5.1778	-28.371	-8.2194
-2.9265	-2.594	-3.835	-6.8359	-5.5237
-2.9264	-7.6701	-0.64087	9.196	1.3326
-2.9263	-1.2817	-0.10173	-6.1747	2.2481
-2.9262	-3.6418	2.0345	-16.123	-0.9257
-2.9261	-1.8921	6.368	-13.275	-4.0792
-2.926	-3.3264	7.4666	4.9744	-4.1097
-2.9259	-5.9102	4.3538	34.17	-12.217
-2.9258	-4.13	1.3631	16.642	-11.953
-2.9257	-4.3538	1.475	-30.467	-6.4901
-2.9256	-4.3844	-3.1942	-44.749	11.464
-2.9255	-12.105	-3.4993	-14.577	12.37
-2.9254	-11.871	0.21362	17.059	16.073
-2.9253	-0.57983	-4.1504	33.447	8.138
-2.9252	11.658	-5.6763	28.788	-11.739
-2.9251	21.495	-5.3609	15.828	-8.3008
-2.925	14.689	3.0314	-21.098	1.9124
-2.9249	9.5011	5.0659	-45.105	2.7873
-2.9248	20.823	0.21362	-22.695	-4.6082
-2.9247	-22.675	-0.295	21.383	-4.5268
-2.9246	-23.936	-16.357	29.012	-8.433
-2.9245	-2.3397	-26.652	25.045	-6.1137
-2.9244	1.3428	-3.6418	13.662	0.30518
-2.9243	28.544	12.217	-1.0376	0.60018
-2.9242	42.775	16.073	-6.6732	7.4768
-2.9241	-106.51	10.722	-0.33569	5.7983
-2.924	-51.799	7.609	-4.1504	1.2614
-2.9239	34.993	0.061035	-4.4352	2.5736
-2.9238	55.461	0.99691	-6.7851	0.36621
-2.9237	24.638	2.065	-6.6427	-0.8138
-2.9236	-0.66121	0.33569	-10.468	2.4516
-2.9235	3.1535	-9.8165	-16.693	-4.5268
-2.9234	-0.80363	-11.892	-7.1208	-3.7333
-2.9233	-7.9549	-8.8094	29.277	-0.98674
-2.9232	-7.8735	2.7262	33.63	-11.251
-2.9231	-2.7669	7.487	-51.107	-8.1685
-2.923	-0.73242	-9.4808	-76.518	-0.47811
-2.9229	-2.6957	-10.885	5.2185	-0.050863
-2.9228	-12.166	-2.7873	38.94	0.33569
-2.9227	-6.8563	2.0752	18.3	6.4189
-2.9226	5.1982	8.138	1.2105	-0.86466
-2.9225	-5.544	5.483	-7.2734	1.2614
-2.9224	-8.7992	-5.7068	-9.5113	1.5259
-2.9223	-7.7006	2.7466	7.5989	-4.5268
-2.9222	-5.5237	8.2804	3.5502	2.8687
-2.9221	13.041	0.66121	-20.793	7.253
-2.922	70.658	1.6479	-30.08	-0.47811
-2.9219	-143.18	6.8054	22.288	-0.55949
-2.9218	-77.423	-0.13224	38.534	7.5175
-2.9217	74.788	-1.6988	22.847	4.954
-2.9216	83.008	-0.53914	-1.1495	2.7059
-2.9215	22.319	1.0885	-11.108	-2.6245
-2.9214	-3.1026	-1.8514	-12.461	-13.357
-2.9213	-8.8908	0.27466	-5.5542	-2.7771
-2.9212	-4.598	0.091553	-5.8187	1.5971
-2.9211	1.4343	-3.6825	-12.685	-7.4463
-2.921	1.6378	-6.897	-19.358	-6.2358
-2.9209	0.96639	-7.4056	-10.712	0.42725
-2.9208	3.3773	-6.9377	3.7028	-0.53914
-2.9207	4.2826	-3.479	6.5816	5.7271
-2.9206	-7.8735	3.1128	9.4604	10.437
-2.9205	-3.3671	1.77	1.18	8.5653
-2.9204	-5.5033	-3.3671	-11.688	7.3954
-2.9203	-28.361	-3.4078	-14.923	3.9368
-2.9202	-12.929	-0.84432	2.8483	-10.03
-2.9201	6.3477	2.6855	28.992	-26.377
-2.92	19.084	2.828	40.243	-25.36
-2.9199	11.993	2.95	30.955	-8.2194
-2.9198	0.16276	3.3162	8.1177	15.279
-2.9197	-2.6957	3.8452	-1.8514	17.324
-2.9196	-10.651	1.414	-18.504	2.2481
-2.9195	-22.247	-0.74259	-11.759	-4.8625
-2.9194	-5.2287	-4.5471	-2.9602	-0.6307
-2.9193	10.142	-2.2786	-20.274	5.0151
-2.9192	9.0637	7.5582	-18.85	6.3477
-2.9191	-1.1393	-6.3578	-6.5308	5.1575
-2.919	-0.46794	-24.017	-0.32552	3.0721
-2.9189	8.9518	-14.394	2.9297	2.7262
-2.9188	16.246	3.0416	-0.57983	-5.1168
-2.9187	8.901	11.973	5.483	-0.36621
-2.9186	2.9806	13.062	-14.974	5.6356
-2.9185	-2.1057	16.022	-22.868	-18.29
-2.9184	-9.6639	11.403	-3.9673	-31.067
-2.9183	-14.76	2.0955	14.913	-25.391
-2.9182	-8.4839	-3.3773	27.425	-6.8868
-2.9181	-4.8523	-5.7576	23.834	8.5246
-2.918	-3.9164	-4.6082	-12.675	17.944
-2.9179	-2.6143	-3.1128	-6.8563	21.403
-2.9178	-11.18	-1.3326	-2.5635	16.073
-2.9177	-10.071	-6.5613	0.6307	10.966
-2.9176	-23.834	-10.6	-16.073	3.0721
-2.9175	-0.76294	-7.5582	-14.567	-5.9509
-2.9174	18.982	-8.9417	-14.15	-10.986
-2.9173	19.979	1.2207	-7.0394	-9.8165
-2.9172	18.636	2.5838	-5.3101	-9.023
-2.9171	14.394	0.72225	3.6214	-0.66121
-2.917	-0.16276	7.6803	23.183	-1.3631
-2.9169	-6.9377	12.044	32.664	-3.713
-2.9168	6.6325	5.9713	-57.77	6.897
-2.9167	7.2428	-7.5582	-46.783	0.36621
-2.9166	0.50863	-16.337	7.487	0.12207
-2.9165	-6.4799	-10.783	35.156	2.2278
-2.9164	-3.418	-3.6519	29.673	0.42725
-2.9163	-6.5715	-3.123	10.712	-1.3529
-2.9162	-8.7992	4.3538	9.7046	-0.39673
-2.9161	-6.3985	12.848	7.3649	0.85449
-2.916	-7.8023	10.091	0.295	2.7771
-2.9159	0.33569	4.7607	-5.3609	5.1473
-2.9158	4.0792	-0.65104	-4.5166	3.123
-2.9157	8.8704	-10.376	-5.2694	-4.9235
-2.9156	-2.4312	-11.475	-7.5989	-10.152
-2.9155	-2.1871	-1.0173	-5.0456	-13.072
-2.9154	-16.184	2.2583	-1.3326	0.85449
-2.9153	-24.526	3.479	3.0924	13.234
-2.9152	-28.422	-5.1575	-1.3428	-1.8616
-2.9151	-13.295	-8.4229	1.8005	-3.5502
-2.915	10.712	4.1707	-0.091553	4.5776
-2.9149	26.784	10.701	-8.3313	-4.8625
-2.9148	23.315	9.5215	-8.4839	-1.77
-2.9147	20.437	13.753	-11.922	-2.6143
-2.9146	11.8	3.2959	-9.9589	-5.0761
-2.9145	6.073	-3.6214	-3.9978	-4.6895
-2.9144	-1.7293	-1.7904	-0.24414	-5.7576
-2.9143	-6.958	-5.9001	4.0487	-8.2601
-2.9142	-9.7961	-9.1654	8.2703	-3.8656
-2.9141	-12.797	-6.4392	6.1035	-3.7638
-2.914	-2.6754	-4.6183	-0.69173	3.1942
-2.9139	2.9704	3.6825	1.6886	6.3985
-2.9138	-1.3326	5.3101	-2.8788	2.5736
-2.9137	-1.7192	1.0885	-6.2561	3.0823
-2.9136	4.6387	0.9257	2.1566	4.425
-2.9135	-4.6895	-16.683	-0.67139	1.9124
-2.9134	-17.375	-14.272	-5.483	0.89518
-2.9133	-6.9987	-2.3905	0.25431	2.8381
-2.9132	2.7873	5.1575	-8.8704	1.3733
-2.9131	9.7961	2.0955	-20.213	1.7598
-2.913	16.866	7.3751	-2.1362	8.1889
-2.9129	6.6223	1.4242	9.6944	-2.0447
-2.9128	-3.0009	-1.7395	5.7983	-10.071
-2.9127	-2.9093	-2.6449	3.4485	-13.702
-2.9126	1.7293	-0.67139	2.889	-14.679
-2.9125	1.2614	-7.5887	9.8267	-3.9571
-2.9124	-4.1606	-7.3446	3.8554	1.2309
-2.9123	2.5431	1.3021	10.427	3.0111
-2.9122	5.6661	0.030518	19.816	5.9102
-2.9121	3.2959	0.76294	-3.418	6.8258
-2.912	-13.875	-0.67139	-44.627	0.12207
-2.9119	-11.393	9.2672	-34.292	6.1442
-2.9118	-0.30518	7.8023	-5.9713	16.022
-2.9117	16.215	7.5378	14.669	-15.554
-2.9116	-24.74	2.8992	7.1716	-14.13
-2.9115	-120.92	0.32552	-2.6347	0.83415
-2.9114	4.9032	-5.0456	7.8328	2.9195
-2.9113	54.993	-2.36	11.851	0.295
-2.9112	38.91	-2.6652	14.72	0.28483
-2.9111	27.7	-1.8209	7.782	2.9399
-2.911	8.6568	0.47811	-17.395	2.7364
-2.9109	9.7656	-0.43742	-23.712	1.0885
-2.9108	1.9531	-3.6825	-14.964	-3.0212
-2.9107	3.0721	-4.2013	-6.9478	-10.071
-2.9106	-6.1849	-5.3304	1.7802	-4.0792
-2.9105	-7.5785	-3.4993	8.7992	1.3835
-2.9104	-3.5095	-7.8735	-0.46794	5.9916
-2.9103	4.9337	-9.1349	-3.0212	1.3529
-2.9102	-22.909	-8.9518	5.8695	-3.4688
-2.9101	-32.42	-3.3875	6.5715	0.79346
-2.91	-4.9032	4.425	10.223	-0.091553
-2.9099	15.188	6.8868	10.579	0.71208
-2.9098	25.736	9.6436	9.6537	-5.1982
-2.9097	16.785	12.217	7.4463	-5.6661
-2.9096	-17.527	6.6833	-1.8209	-3.3061
-2.9095	-45.695	2.655	-14.058	1.5055
-2.9094	-5.5542	-13.051	-6.1035	3.4078
-2.9093	23.875	-17.965	-6.5511	4.8116
-2.9092	34.414	-8.606	-5.127	6.3782
-2.9091	20.447	0.33569	-1.7802	1.0274
-2.909	3.0721	4.0588	-10.905	0.67139
-2.9089	-4.0995	10.468	-10.173	-2.2888
-2.9088	-10.783	12.98	6.4494	-7.1716
-2.9087	-12.227	7.4463	9.8775	-4.4657
-2.9086	-4.7302	3.2145	10.63	3.8859
-2.9085	-5.9713	-4.3335	16.266	6.5308
-2.9084	-5.3202	-6.4494	-19.735	-2.4821
-2.9083	-3.1637	1.0579	-34.149	-5.9408
-2.9082	-1.8107	6.724	-17.08	-9.0841
-2.9081	-8.4127	-0.38656	-0.010173	-6.9173
-2.908	-15.218	-10.579	-0.37638	0.19328
-2.9079	-12.899	-10.335	5.778	2.8585
-2.9078	3.3773	-2.0854	10.905	4.4759
-2.9077	17.568	-4.5573	10.325	2.3804
-2.9076	8.0261	0.10173	5.3914	-2.4109
-2.9075	5.0761	-1.8005	0.42725	-5.3406
-2.9074	-8.6975	-0.61035	1.1292	-7.4972
-2.9073	2.9806	0.75277	9.2061	-1.7904
-2.9072	17.1	6.134	-1.1495	-3.0823
-2.9071	13.265	7.0496	-10.152	-0.08138
-2.907	13.224	1.475	-10.274	-8.9111
-2.9069	5.8695	3.713	-15.544	-0.86466
-2.9068	1.7497	7.5277	-3.3671	16.663
-2.9067	4.6387	-0.62052	13.855	12.095
-2.9066	2.2786	-9.0535	3.774	9.0129
-2.9065	-7.1208	-12.166	2.004	8.6263
-2.9064	-22.725	-13.194	3.7435	0.061035
-2.9063	-21.169	-6.9784	4.3742	-4.7811
-2.9062	-14.842	-10.701	-2.8992	-7.0597
-2.9061	-6.012	-7.9041	-8.2092	-15.076
-2.906	0.050863	-0.42725	-5.2083	-2.3193
-2.9059	2.3193	4.6183	6.4697	5.0354
-2.9058	5.0964	2.889	-0.7019	7.0597
-2.9057	-5.7373	7.1513	-9.7555	12.736
-2.9056	-8.3211	9.1654	-6.6732	-1.5869
-2.9055	8.962	3.184	-3.6214	-20.691
-2.9054	-36.621	2.9297	1.3936	-11.912
-2.9053	-10.468	0.45776	1.6988	2.2685
-2.9052	16.001	3.9978	1.0173	9.4503
-2.9051	30.263	11.882	3.1128	13.112
-2.905	33.274	-10.183	-5.3101	5.1778
-2.9049	20.182	-17.324	-5.422	-8.5246
-2.9048	-159.92	-6.5206	-7.2937	-8.6975
-2.9047	-43.66	0.020345	-6.2968	-5.717
-2.9046	59.967	-3.1026	-3.8249	-3.835
-2.9045	69.834	-5.7678	4.2419	6.0221
-2.9044	52.185	-1.5157	5.8085	1.8005
-2.9043	23	-0.41707	-2.7466	-2.4109
-2.9042	-13.265	8.8196	-0.60018	-2.8483
-2.9041	-17.171	0.55949	5.4321	-3.6011
-2.904	-5.2795	-0.68156	10.763	-1.2105
-2.9039	2.4719	0.69173	5.5339	2.7974
-2.9038	1.6174	-1.7598	-1.7293	-3.0416
-2.9037	-10.244	-1.0376	-0.55949	-2.004
-2.9036	-2.4109	0.2238	-5.1066	2.9907
-2.9035	4.3335	-0.28483	-2.9806	0.89518
-2.9034	-6.9478	1.4343	-2.1566	2.9297
-2.9033	-13.631	4.6488	-13.133	6.6732
-2.9032	-8.3008	0.37638	-8.6568	-0.59001
-2.9031	-28.625	3.1738	-0.20345	-3.3773
-2.903	-15.493	-1.2817	6.3578	3.3061
-2.9029	11.292	-8.433	16.561	-4.425
-2.9028	20.945	-5.9408	14.008	-3.1942
-2.9027	23.407	1.4242	14.709	-3.7842
-2.9026	17.08	0.98674	15.218	-3.9673
-2.9025	-4.0588	1.0579	6.4087	-2.065
-2.9024	-15.859	1.3733	-12.238	-10.386
-2.9023	-17.466	-0.88501	-15.94	-5.483
-2.9022	-25.218	-7.4666	-8.5246	9.5011
-2.9021	-0.56966	-4.5166	-12.044	-5.6763
-2.902	11.281	1.2512	-18.351	-29.887
-2.9019	11.23	14.079	-8.0363	-16.764
-2.9018	17.141	9.9792	1.7802	10.254
-2.9017	16.459	5.7678	-32.216	26.601
-2.9016	11.19	4.4454	-32.949	31.433
-2.9015	1.0681	-5.3304	0.31535	11.373
-2.9014	-10.366	-11.932	26.174	0
-2.9013	-29.938	-9.5113	29.307	7.4361
-2.9012	-17.558	-3.5502	26.978	-1.0376
-2.9011	1.0885	-0.96639	9.7148	-11.515
-2.901	8.2194	2.6652	-4.9438	-8.3822
-2.9009	6.5104	2.3905	-13.489	-6.0221
-2.9008	-1.1698	1.0478	-3.8757	-3.0721
-2.9007	-13.54	4.2114	0.96639	5.0761
-2.9006	-14.537	3.9775	2.9907	1.9938
-2.9005	-5.9611	6.1035	-12.787	-5.0761
-2.9004	-1.0071	-6.3883	-27.13	-2.2176
-2.9003	11.037	-20.467	-0.56966	-2.1261
-2.9002	22.573	-10.244	28.931	-0.25431
-2.9001	17.141	5.8594	30.202	2.4312
-2.9	-49.866	6.663	22.725	-5.2999
-2.8999	-2.065	2.7974	15.198	-4.1606
-2.8998	2.7262	5.2694	4.7302	-2.2786
-2.8997	33.244	-5.483	-19.368	-0.80363
-2.8996	20.61	-9.0739	-36.092	-0.12207
-2.8995	1.0681	-5.0151	-41.819	5.2694
-2.8994	4.1504	3.4688	-19.582	-2.9602
-2.8993	-7.4259	4.13	-2.0752	-4.9438
-2.8992	-1.8005	4.6692	12.675	-5.3914
-2.8991	4.3335	1.7293	15.432	3.0924
-2.899	3.4485	-6.9784	8.311	2.8178
-2.8989	-12.939	-4.2725	-1.9938	0.54932
-2.8988	-8.311	-1.5869	-17.303	-4.6082
-2.8987	1.9735	0.98674	-21.118	-0.08138
-2.8986	3.9368	-5.2694	-7.1513	4.13
-2.8985	8.1584	-5.4016	9.7656	3.418
-2.8984	6.1442	1.414	17.548	-0.37638
-2.8983	-15.249	-1.1902	10.03	-7.1208
-2.8982	-16.093	-8.5144	9.7555	-10.508
-2.8981	-2.7669	0.26449	1.8005	-7.2021
-2.898	7.5989	0.95622	0.98674	-3.9368
-2.8979	7.8634	2.5635	0.36621	-3.1738
-2.8978	5.6356	10.04	-2.4007	2.8585
-2.8977	-7.609	7.7718	5.7983	2.889
-2.8976	-41.382	1.3021	1.7293	0.35604
-2.8975	-22.349	-5.0252	-30.843	0.85449
-2.8974	-3.3671	-7.2021	-21.647	-3.1128
-2.8973	13.692	-0.16276	-15.238	-6.724
-2.8972	17.385	1.4242	-3.245	-1.77
-2.8971	14.872	-1.18	13.997	2.4211
-2.897	9.4808	1.3835	9.0129	1.6479
-2.8969	6.6732	5.7475	9.491	1.8616
-2.8968	-2.8788	2.8178	6.7037	8.2601
-2.8967	-14.608	1.5361	-0.47811	5.7882
-2.8966	-13.357	1.18	0.46794	5.0761
-2.8965	-4.9947	-5.7373	0.85449	7.8634
-2.8964	-4.954	-11.77	-8.0363	-3.3569
-2.8963	-4.0588	-8.1787	-9.4299	-3.54
-2.8962	1.2919	1.0376	-1.9328	-2.8585
-2.8961	3.8554	18.209	5.4423	-1.9633
-2.896	-0.13224	21.861	5.4728	6.1646
-2.8959	-6.7342	-64.067	6.6223	-7.0292
-2.8958	1.6683	-48.248	11.414	-20.508
-2.8957	9.5215	26.703	-2.1159	-16.846
-2.8956	-0.18311	35.96	-7.3853	-5.2897
-2.8955	1.5869	19.307	-8.9315	5.8187
-2.8954	-3.6825	3.0111	-17.253	11.922
-2.8953	-0.55949	-0.38656	-18.717	5.4016
-2.8952	4.6082	1.18	19.735	-3.2959
-2.8951	4.2623	-2.2074	42.979	-3.2959
-2.895	-1.6785	-3.7944	-34.709	0.49845
-2.8949	-9.8979	-0.26449	-66.762	6.4799
-2.8948	-12.838	-1.8107	4.4556	5.7475
-2.8947	-2.8076	0.41707	25.106	0.5188
-2.8946	9.613	-5.6254	22.959	-4.6895
-2.8945	4.0894	-7.5175	13.336	-2.8992
-2.8944	-9.6537	-2.9602	14.994	1.3123
-2.8943	-0.050863	-0.7019	-21.047	-3.418
-2.8942	18.117	0.66121	-17.873	-0.47811
-2.8941	7.2428	5.2389	-0.59001	0.30518
-2.894	-3.7638	-0.091553	10.712	0.5188
-2.8939	-6.1646	-4.3844	6.012	0.93587
-2.8938	-8.138	3.3366	0.32552	0.061035
-2.8937	-6.6325	1.8616	8.7992	-10.569
-2.8936	-4.7709	-5.5949	9.5622	-10.885
-2.8935	-2.7364	-5.3202	17.629	1.5259
-2.8934	6.7952	-6.6427	80.983	-4.8625
-2.8933	3.4993	-5.778	-93.363	-9.0841
-2.8932	1.9531	1.7598	-133.42	-0.73242
-2.8931	-1.5462	3.5502	21.037	18.148
-2.893	8.4432	-1.1393	71.838	20.538
-2.8929	-1.1902	-1.9328	3.7537	11.475
-2.8928	3.9978	-3.2552	-17.548	4.1097
-2.8927	5.4932	-1.5971	-13.011	-5.1473
-2.8926	-17.466	3.1433	3.4587	-14.079
-2.8925	-18.443	-2.0142	7.7515	-6.3782
-2.8924	8.667	-0.94604	10.925	-10.844
-2.8923	24.79	5.1066	9.5317	-2.7669
-2.8922	16.347	3.1942	3.4587	5.9814
-2.8921	-19.836	1.6988	3.4587	4.659
-2.892	-16.724	1.9023	0.49845	12.075
-2.8919	-0.55949	2.0549	-20.111	2.238
-2.8918	16.774	-2.5024	-21.952	-26.611
-2.8917	0.57983	1.3428	-5.1168	-23.6
-2.8916	-19.765	0.59001	-0.56966	-5.188
-2.8915	3.4688	-1.8107	4.5878	4.1402
-2.8914	58.482	-0.33569	8.8298	15.188
-2.8913	-177.49	-0.91553	6.0628	20.894
-2.8912	-37.16	-4.8726	0.79346	12.929
-2.8911	87.941	2.0243	-5.5847	7.8634
-2.891	85.541	1.8717	-5.5644	-2.4414
-2.8909	34.505	-2.4007	-2.95	-3.6621
-2.8908	9.3587	0.10173	0.57983	-2.1769
-2.8907	-7.8837	0.90535	3.1637	-4.0588
-2.8906	-16.408	-2.0447	-9.1349	-11.363
-2.8905	-30.507	0.61035	-22.98	-1.475
-2.8904	-16.337	-4.2521	-7.6396	-2.8585
-2.8903	-3.9673	-6.0527	16.144	1.3123
-2.8902	9.0027	-5.6559	25.614	0.57983
-2.8901	0.52897	-2.9806	11.851	-5.8797
-2.89	-0.24414	0.21362	3.54	-13.295
-2.8899	4.4759	1.9124	-4.2419	-4.8726
-2.8898	7.8735	-1.6174	-7.7616	-2.8178
-2.8897	-10.04	-0.80363	-4.0385	2.0243
-2.8896	-1.4445	-0.24414	-3.9368	-2.004
-2.8895	7.5989	-11.8	-0.99691	-7.3751
-2.8894	1.6073	-17.385	-7.1208	4.1504
-2.8893	-10.62	-8.372	1.3123	14.394
-2.8892	-7.1411	0.030518	6.2256	10.651
-2.8891	-2.004	6.3578	3.9571	9.2367
-2.889	1.7395	5.6864	-4.9133	6.897
-2.8889	-0.69173	-0.7019	-12.716	1.9938
-2.8888	-1.1902	0.60018	-21.383	-1.9531
-2.8887	-7.5989	-0.88501	-14.76	-1.6886
-2.8886	-17.12	0.61035	3.9775	-6.4799
-2.8885	-11.21	5.3202	16.134	-6.1747
-2.8884	-0.85449	11.047	11.627	-8.667
-2.8883	5.6152	10.427	1.5361	-9.2773
-2.8882	9.2061	12.777	-4.364	1.0885
-2.8881	-20.955	8.6975	-5.5542	7.4259
-2.888	-22.461	7.7616	-2.4923	4.3132
-2.8879	4.6997	-2.4414	4.0792	-0.91553
-2.8878	15.188	-11.658	9.8165	-0.84432
-2.8877	22.4	-11.485	6.134	-2.6347
-2.8876	26.815	1.7802	1.8107	-14.73
-2.8875	18.636	0.9257	-5.0557	-9.0637
-2.8874	0.33569	-4.0588	0.071208	-8.9925
-2.8873	-16.51	4.008	-6.7851	3.8859
-2.8872	-20.396	-0.45776	-10.234	11.81
-2.8871	-11.078	-2.9704	-4.954	10.844
-2.887	-1.9023	0.59001	4.9133	2.8992
-2.8869	2.0549	-3.0009	9.196	2.3092
-2.8868	1.8412	-1.119	8.3516	4.4963
-2.8867	3.1331	-0.17293	5.839	2.5635
-2.8866	-0.34587	-14.343	-1.241	-2.0345
-2.8865	0.68156	-13.926	-21.22	-0.54932
-2.8864	2.9399	-7.9956	-11.871	-5.0151
-2.8863	0.49845	-7.5277	-6.429	-2.9602
-2.8862	0.14242	-1.7293	0.33569	-6.0933
-2.8861	-1.241	2.6245	13.947	-3.6825
-2.886	-9.3892	3.8554	10.864	-0.14242
-2.8859	-10.793	5.7678	1.475	-1.5157
-2.8858	-0.061035	9.2163	-0.33569	-4.4047
-2.8857	12.065	4.7811	-7.9549	-1.0478
-2.8856	11.525	3.713	-7.1513	-0.79346
-2.8855	4.7506	1.5157	-4.3742	-0.15259
-2.8854	-6.2154	8.6873	-2.1769	0.26449
-2.8853	-2.8178	15.981	0.55949	-4.8014
-2.8852	4.6794	12.238	7.0496	2.7364
-2.8851	13.957	-12.533	3.1128	3.9469
-2.885	12.573	-22.898	5.1982	1.1698
-2.8849	-8.4737	-12.115	7.3751	-1.4343
-2.8848	-2.1261	1.1902	1.4547	-0.14242
-2.8847	7.5989	1.7395	-4.7811	-2.5635
-2.8846	4.6082	8.5551	0.86466	-4.0487
-2.8845	-22.288	6.1035	-3.5706	-4.6997
-2.8844	-25.614	4.0181	-7.5277	1.0173
-2.8843	-6.897	-2.1566	-9.9691	8.433
-2.8842	6.3477	-5.2083	-0.79346	6.958
-2.8841	9.8165	-2.4211	11.129	8.3313
-2.884	6.1646	-5.3914	-0.91553	4.9845
-2.8839	-5.0049	-5.422	-23.387	0
-2.8838	-10.661	-0.54932	-16.856	-7.3853
-2.8837	-7.1818	-1.7395	4.8726	-9.023
-2.8836	-16.276	-1.2512	16.622	-11.831
-2.8835	-6.2968	-1.2105	17.7	-8.1075
-2.8834	11.922	-6.3578	17.283	-0.69173
-2.8833	20.549	-5.7373	11.475	7.9651
-2.8832	12.309	-2.4923	-25.004	13.357
-2.8831	1.77	-2.3702	-42.308	-16.998
-2.883	-14.516	1.0173	-48.91	-30.965
-2.8829	-29.195	3.3976	-13.306	-13.387
-2.8828	-36.967	4.8116	13.885	9.1044
-2.8827	4.7709	-2.0549	22.99	18.86
-2.8826	23.936	-1.5259	18.789	13.529
-2.8825	14.14	-4.364	11.281	6.0832
-2.8824	-13.346	-1.6581	2.3905	-2.3092
-2.8823	0.49845	0.43742	6.5816	7.782
-2.8822	8.9925	3.6418	2.2685	8.8704
-2.8821	12.105	8.9925	0.59001	1.3326
-2.882	4.3945	6.9784	0.53914	3.7842
-2.8819	-4.2419	6.3985	-9.5825	0.41707
-2.8818	-5.0964	6.0221	-1.6479	-3.1331
-2.8817	-6.1442	-0.31535	9.9182	-7.1309
-2.8816	3.3162	-5.5847	5.8492	-6.8156
-2.8815	10.579	-2.7364	3.4587	-4.9337
-2.8814	42.887	-2.4821	5.6254	1.9836
-2.8813	-26.876	-2.8381	-1.1495	-4.2216
-2.8812	-153.68	0.46794	-20.762	-11.149
-2.8811	19.501	-5.7576	-11.536	-8.4127
-2.881	96.842	-23.265	-3.3671	-4.659
-2.8809	62.917	-20.284	2.9093	-5.2694
-2.8808	14.577	-11.587	-0.020345	-3.0416
-2.8807	-29.49	-2.9093	-3.7028	2.0955
-2.8806	-9.6639	2.2481	-4.954	5.5339
-2.8805	1.0173	8.7077	-8.8501	4.1606
-2.8804	-4.4149	14.76	-7.5684	3.4383
-2.8803	3.2552	16.581	-0.38656	4.1199
-2.8802	-4.1809	7.1106	6.3883	2.6754
-2.8801	-19.562	6.3782	4.4759	-0.36621
-2.88	-20.701	3.8249	-0.43742	4.7099
-2.8799	-14.353	-5.4016	-2.8788	-4.5878
-2.8798	-6.5206	-2.3702	-1.709	-13.519
-2.8797	4.0894	-2.4719	0.46794	-5.8492
-2.8796	0.53914	-14.984	3.6418	-2.4211
-2.8795	-7.3853	-12.146	5.5135	1.4038
-2.8794	-14.282	-6.2256	0.24414	11.088
-2.8793	-22.888	-0.49845	-3.418	0.68156
-2.8792	10.701	2.0955	-1.0173	-2.4109
-2.8791	23.661	-1.3428	2.0243	-4.2521
-2.879	21.189	1.414	5.0964	-4.3437
-2.8789	15.513	9.6741	8.606	-3.3875
-2.8788	10.101	7.782	3.3264	0.89518
-2.8787	8.2804	4.3335	-5.8594	-1.414
-2.8786	-25.869	7.0292	-9.7046	-15.106
-2.8785	-21.769	4.2419	-14.252	-3.835
-2.8784	-9.8877	-2.6449	-7.2123	4.4352
-2.8783	-13.865	-2.5431	5.2897	2.6143
-2.8782	17.863	-4.2521	5.5339	9.4198
-2.8781	28.585	-2.0243	-1.0885	13.987
-2.878	27.7	-0.73242	-5.3711	11.8
-2.8779	20.498	0.31535	-0.10173	19.287
-2.8778	2.7466	-1.709	3.9164	-25.94
-2.8777	-3.8757	-0.35604	-0.091553	-41.718
-2.8776	-4.8421	-5.4321	-4.3538	-23.641
-2.8775	1.18	-9.1553	-8.8501	3.2857
-2.8774	-0.76294	-6.0425	-20.02	13.824
-2.8773	-3.0721	-6.4697	-11.078	24.19
-2.8772	-5.0761	1.8819	5.1168	22.695
-2.8771	-17.771	-1.3529	10.63	12.431
-2.877	-16.652	-1.6174	10.234	3.54
-2.8769	-9.2061	3.479	7.3954	-9.5825
-2.8768	0.79346	10.956	0.54932	-16.591
-2.8767	-1.2919	7.8328	-2.7669	-4.0181
-2.8766	-5.9204	6.5206	-7.1208	5.1982
-2.8765	-4.1809	4.2013	-6.0018	1.1902
-2.8764	-4.5166	-5.6864	-2.4719	-3.835
-2.8763	-0.68156	-2.2278	-3.7537	0.08138
-2.8762	0.39673	-4.9032	13.723	-0.79346
-2.8761	-2.7262	-8.2092	54.606	-3.8554
-2.876	-1.6683	-6.4799	-99.731	-0.08138
-2.8759	2.5228	-4.4861	-61.076	-2.0447
-2.8758	-1.0478	-3.7231	22.939	-1.7293
-2.8757	9.9182	1.6276	47.363	-2.4923
-2.8756	3.9775	0.43742	14.587	0.08138
-2.8755	12.065	-1.1393	1.1292	-0.86466
-2.8754	64.626	2.2888	-2.0854	-0.56966
-2.8753	-133.33	1.5259	1.1698	-3.7638
-2.8752	-99.467	-2.5533	15.645	-8.7382
-2.8751	49.815	4.4861	9.5825	-8.9925
-2.875	84.239	4.3538	-1.4343	-1.18
-2.8749	24.77	4.4556	-7.0089	-2.2481
-2.8748	-8.4839	6.5613	-6.8258	-3.5502
-2.8747	-4.9235	-4.3132	-6.0628	0.41707
-2.8746	-5.5949	-11.607	-30.172	6.7952
-2.8745	-5.8492	-9.2367	-16.398	9.9589
-2.8744	-2.95	-4.4149	2.5533	4.8523
-2.8743	0.16276	2.6143	17.914	5.0456
-2.8742	2.2786	0.53914	16.49	-1.6785
-2.8741	11.373	-5.3101	15.93	0.57983
-2.874	14.852	-4.2826	4.5268	0.010173
-2.8739	13.102	-0.66121	-17.019	-4.0995
-2.8738	-5.1982	-0.37638	-2.2074	-15.066
-2.8737	-28.717	4.1402	8.0973	-0.96639
-2.8736	-29.836	4.0181	10.64	11.068
-2.8735	-11.709	3.6723	13.814	6.5002
-2.8734	12.339	2.3092	-5.3304	1.4954
-2.8733	21.688	-3.5909	-26.733	-1.3224
-2.8732	24.77	-1.0173	-10.773	-14.333
-2.8731	17.558	3.1128	-3.1331	-28.676
-2.873	0.42725	-2.4719	-2.7059	-10.549
-2.8729	-9.5011	-4.2419	3.4078	9.9691
-2.8728	-15.981	-3.5197	0.12207	15.066
-2.8727	-7.6701	-6.2663	1.7904	14.079
-2.8726	4.2216	-5.5237	-0.20345	19.531
-2.8725	-1.4852	-10.081	0.5188	11.648
-2.8724	-8.8399	-10.783	0.78328	3.2857
-2.8723	-14.679	-0.98674	-0.44759	-5.6254
-2.8722	-28.076	5.4525	-5.9306	-16.571
-2.8721	-19.613	7.2428	-6.1951	-10.895
-2.872	3.0924	2.9195	-1.7192	3.3773
-2.8719	16.408	7.9346	0.59001	12.37
-2.8718	18.016	1.5666	4.3538	15.249
-2.8717	8.4025	0.72225	-5.6661	9.6639
-2.8716	0.7019	-0.56966	-22.878	-0.071208
-2.8715	2.0142	0.75277	-16.541	-12.319
-2.8714	-1.8107	-1.2614	-1.0783	-10.752
-2.8713	-18.392	7.314	8.0261	-15.228
-2.8712	-18.392	9.3587	17.721	-11.556
-2.8711	-4.1707	-2.2481	17.598	-6.9987
-2.871	-0.83415	-7.9956	-9.023	-3.7842
-2.8709	10.254	-12.777	-8.8298	-0.65104
-2.8708	13.418	-19.318	0.19328	2.2685
-2.8707	15.188	5.1982	10.803	-0.59001
-2.8706	6.9478	11.973	19.765	3.2857
-2.8705	8.3516	11.302	12.492	2.5024
-2.8704	-29.989	9.491	-1.7904	-5.0964
-2.8703	4.8014	3.3773	-14.069	3.1738
-2.8702	-8.5856	-5.0456	-4.5675	2.4312
-2.8701	-24.76	-6.7749	-5.1066	-5.2795
-2.87	-2.065	-4.8523	-3.6316	-0.71208
-2.8699	9.3079	-6.9885	0.34587	5.3914
-2.8698	18.921	-3.6621	1.1393	-0.49845
-2.8697	13.835	-2.7466	-0.21362	0.64087
-2.8696	3.7333	1.5971	6.4596	3.5706
-2.8695	2.299	-0.39673	7.8735	8.4839
-2.8694	1.8107	-2.4618	2.8483	-7.192
-2.8693	-0.42725	-0.97656	1.0376	-27.985
-2.8692	-1.5564	-0.17293	-3.5095	-18.982
-2.8691	-5.6763	3.835	-10.01	5.8797
-2.869	-2.8992	7.8532	-12.085	21.505
-2.8689	-2.1464	0.60018	-13.702	20.61
-2.8688	-1.3021	-11.882	-11.18	17.039
-2.8687	-0.43742	-8.1991	-1.5259	2.3499
-2.8686	-0.30518	0.83415	-1.3733	-6.0628
-2.8685	-16.429	7.2734	0.6307	-8.2397
-2.8684	-20.162	12.136	8.0973	-13.397
-2.8683	1.7293	2.8788	6.5104	-16.866
-2.8682	11.719	-5.6864	6.1747	-16.836
-2.8681	2.7466	-9.7148	3.6418	-7.5582
-2.868	1.6683	-12.838	1.1393	-3.2959
-2.8679	3.9673	-7.8939	6.1137	2.6855
-2.8678	2.7568	4.3233	-17.436	9.0332
-2.8677	3.4688	7.2123	-16.368	17.283
-2.8676	-4.1809	7.2123	-11.973	22.471
-2.8675	0.39673	1.9124	-3.8859	1.2105
-2.8674	-1.2004	-0.31535	0.33569	-24.882
-2.8673	-2.2278	1.0173	5.8085	-16.53
-2.8672	2.2685	-3.1433	7.0292	-5.7678
-2.8671	5.9611	-4.8421	-2.5024	6.6935
-2.867	3.6316	-2.9297	-7.7515	16.093
-2.8669	4.4657	3.2857	-1.5462	17.09
-2.8668	0.94604	1.475	8.4839	11.912
-2.8667	0.7019	-0.60018	15.554	12.919
-2.8666	-2.7262	-6.3273	9.1553	4.9845
-2.8665	-23.885	-6.3883	-13.153	-9.3486
-2.8664	-29.816	-2.5126	-18.056	-4.2114
-2.8663	-5.2694	-0.2238	-5.6864	-7.4565
-2.8662	20.671	8.3516	6.6223	-12.736
-2.8661	19.216	11.22	7.8023	-9.5317
-2.866	10.824	6.5002	2.8788	-2.4923
-2.8659	-7.9854	-8.3313	-2.0142	-5.3304
-2.8658	-5.4525	-9.6537	-13.621	-3.9775
-2.8657	11.281	-6.9275	-19.684	-1.7497
-2.8656	4.5064	6.429	-6.1544	3.2145
-2.8655	-9.0129	13.041	16.693	10.101
-2.8654	-9.3282	6.958	26.774	-13.357
-2.8653	1.0986	-3.4383	13.285	-21.22
-2.8652	-7.6904	-11.241	5.5745	-12.634
-2.8651	-11.088	-12.339	-6.0323	-4.2623
-2.865	4.954	-5.5949	0.48828	7.2225
-2.8649	11.8	-6.3985	0.65104	21.769
-2.8648	5.6051	-5.1066	-1.2512	-12.258
-2.8647	0.071208	3.1026	-3.1026	-10.549
-2.8646	3.4993	5.9509	-5.8695	3.245
-2.8645	-1.119	5.7373	-7.3547	10.091
-2.8644	-0.37638	2.8381	-6.5918	9.0027
-2.8643	-3.418	-1.7395	-7.548	8.9823
-2.8642	-7.7413	0.32552	-7.2327	6.5409
-2.8641	-1.6785	-0.13224	-10.061	6.7342
-2.864	5.5339	0.9257	-8.4025	-5.8085
-2.8639	4.008	1.8107	-9.1553	-35.156
-2.8638	-2.7364	-3.4485	-11.2	-36.753
-2.8637	1.3428	-6.7952	-10.997	-14.272
-2.8636	5.5033	-4.0995	0.45776	7.2632
-2.8635	4.1606	-2.4109	11.515	20.61
-2.8634	2.6652	-4.3742	13.357	19.867
-2.8633	1.5666	3.4892	17.985	13.601
-2.8632	-2.7466	5.8492	9.4808	19.725
-2.8631	-6.6325	8.3415	-4.8014	13.275
-2.863	-13.753	-0.87484	-7.5175	2.6347
-2.8629	-16.184	-29.154	3.4281	-13.814
-2.8628	-9.3994	-17.741	21.311	-35.614
-2.8627	-3.7638	-2.828	30.111	-26.998
-2.8626	-7.1309	5.4932	-2.7364	-0.55949
-2.8625	-5.0964	3.5807	-17.212	13
-2.8624	1.9633	5.3813	-35.563	5.6966
-2.8623	5.5847	11.882	-27.802	13.763
-2.8622	2.533	10.284	-3.5909	9.5011
-2.8621	6.6935	3.1738	1.3733	3.0212
-2.862	4.2013	2.5635	1.3428	3.9368
-2.8619	-9.6741	12.431	-1.2716	-7.2327
-2.8618	-7.4463	8.1787	4.1402	-8.0363
-2.8617	-21.545	6.0425	0.97656	0.2238
-2.8616	-5.9611	4.0283	-3.9469	1.0376
-2.8615	4.7709	-4.4047	-5.5135	6.0628
-2.8614	12.39	-0.79346	-5.7576	10.04
-2.8613	-6.8868	-9.7656	-2.1362	1.3529
-2.8612	-14.333	-19.216	0.4069	-4.0995
-2.8611	5.6966	-14.364	-7.7311	-3.7842
-2.861	12.644	-6.1849	-4.7099	-4.659
-2.8609	27.608	2.7262	-3.8452	-0.48828
-2.8608	4.3742	4.5675	3.0009	2.3702
-2.8607	-2.2074	2.9806	7.9753	4.2521
-2.8606	0.84432	4.1606	7.5378	11.648
-2.8605	1.5259	3.6926	10.132	-2.9195
-2.8604	-11.068	-2.2685	13.906	-32.969
-2.8603	-10.142	-9.1756	1.241	-26.611
-2.8602	-33.264	-6.5104	3.6418	-0.45776
-2.8601	-21.322	-8.0668	1.18	13.102
-2.86	0.94604	-1.4547	-2.065	15.035
-2.8599	7.0394	1.2614	-3.7333	1.0173
-2.8598	16.347	-0.28483	-2.2786	-7.5785
-2.8597	24.974	-0.04069	-4.2318	-3.7333
-2.8596	23.539	0.26449	-3.0111	2.4923
-2.8595	18.951	-2.533	1.7293	0.62052
-2.8594	17.171	-2.4516	-2.36	4.8218
-2.8593	4.8014	3.2145	-7.5175	3.9164
-2.8592	-10.671	5.6254	-6.7546	-0.38656
-2.8591	-14.821	1.8717	-8.962	0.32552
-2.859	-17.344	-12.329	3.2959	3.8452
-2.8589	-8.7179	-18.545	0.94604	0.21362
-2.8588	-3.4688	-7.8532	-0.64087	-3.5197
-2.8587	-3.6418	1.1393	-1.8616	-2.065
-2.8586	3.6214	5.3406	-2.2888	2.4312
-2.8585	6.2256	12.054	6.8258	6.3477
-2.8584	9.7758	8.2397	5.2897	-0.85449
-2.8583	-17.771	5.6763	-9.7961	-4.5471
-2.8582	-29.317	-3.54	-12.848	-9.2163
-2.8581	-16.612	5.839	-2.1871	-8.433
-2.858	1.7904	7.0292	1.6378	-6.9377
-2.8579	13.702	6.2256	2.9806	-2.828
-2.8578	13.997	-1.1088	4.9337	-2.7568
-2.8577	6.2154	-9.6436	3.4688	-2.2786
-2.8576	5.4932	-8.6568	7.2937	-0.091553
-2.8575	0.95622	-11.464	6.6732	-2.6042
-2.8574	-1.3326	-5.4932	4.5675	-9.9182
-2.8573	-9.7046	-1.5361	1.7598	3.123
-2.8572	-12.858	-4.3233	0.53914	6.724
-2.8571	0.47811	-7.609	-31.901	2.6347
-2.857	6.4697	-4.7099	-27.547	4.8218
-2.8569	1.5767	15.656	-7.5989	5.6559
-2.8568	-1.0376	19.297	5.717	13.316
-2.8567	-2.7161	14.323	9.6842	11.088
-2.8566	-1.0579	6.7851	9.7249	-1.119
-2.8565	-12.38	-9.8775	6.1747	-8.901
-2.8564	-10.396	-16.49	8.2194	-5.9204
-2.8563	1.3835	-3.7231	-0.67139	-10.386
-2.8562	9.6537	1.4648	-17.446	-11.81
-2.8561	8.4941	1.18	-21.474	-1.2919
-2.856	11.22	4.5369	-14.404	1.1292
-2.8559	10.305	-0.87484	1.2716	1.3936
-2.8558	14.181	-5.5644	9.4503	6.073
-2.8557	20.315	-1.2817	7.7922	1.7395
-2.8556	8.2397	1.18	7.3954	-1.18
-2.8555	-2.6042	-2.9907	10.091	8.2703
-2.8554	-14.994	1.3224	4.5573	-1.1088
-2.8553	-16.805	1.8107	7.6192	2.8585
-2.8552	-15.889	0.49845	11.719	5.7576
-2.8551	-16.988	-1.2207	3.9164	-7.9854
-2.855	-14.069	-2.5838	-6.0832	-5.2795
-2.8549	-7.1818	-1.8005	-2.5228	0.2238
-2.8548	5.0252	3.7638	-1.0274	-3.6825
-2.8547	0.9257	-3.7333	0.82397	0.5188
-2.8546	-0.6307	-6.2764	-2.3397	2.2583
-2.8545	-0.5188	-4.4454	-9.0434	-6.4189
-2.8544	-8.7484	-0.55949	-3.5095	-2.8585
-2.8543	-17.253	0.91553	-3.835	-0.18311
-2.8542	-2.6957	-0.95622	-11.82	-0.050863
-2.8541	7.8023	-0.82397	-13.041	6.429
-2.854	15.798	-5.3101	-10.366	4.4861
-2.8539	12.98	-2.5635	-3.6519	-3.7537
-2.8538	-5.8695	-2.4414	5.6763	1.8209
-2.8537	1.4242	6.0018	10.661	-17.039
-2.8536	13.306	4.303	5.7271	-22.725
-2.8535	14.353	0.68156	5.2083	-5.1982
-2.8534	7.0597	-2.0447	2.36	9.6842
-2.8533	-1.6683	-1.414	-9.5825	11.749
-2.8532	-3.0111	-11.922	-6.9275	17.334
-2.8531	1.9938	-6.5918	-5.0863	11.668
-2.853	6.9377	5.4016	-0.79346	-0.8138
-2.8529	-6.0018	6.2561	1.3936	1.4852
-2.8528	-20.213	3.0009	4.4454	-2.533
-2.8527	-11.088	1.7395	7.7616	-5.0863
-2.8526	2.3193	1.8107	7.3547	-0.89518
-2.8525	-3.0212	1.4547	5.1066	-4.8014
-2.8524	-8.1177	0.46794	-3.0721	-9.9894
-2.8523	-0.2238	2.1667	-1.2614	1.8514
-2.8522	2.8585	1.9836	9.8368	-0.15259
-2.8521	1.2309	2.7466	12.319	-1.0478
-2.852	1.8209	6.2764	2.3804	3.3366
-2.8519	1.77	10.722	1.2105	0.18311
-2.8518	-1.8412	2.1159	-36.855	0.97656
-2.8517	-4.9744	-5.4423	-53.162	-1.4648
-2.8516	-11.983	-5.4016	-15.411	-3.8249
-2.8515	3.774	-7.8023	12.736	-0.21362
-2.8514	13.926	-7.609	23.234	0.15259
-2.8513	-14.496	-3.9775	24.007	-4.069
-2.8512	-5.0964	-5.0252	14.893	-1.4954
-2.8511	-0.71208	-5.4016	-1.6581	5.3406
-2.851	-6.2459	-0.2238	-2.6652	-6.3578
-2.8509	5.5339	-3.774	-5.7068	-1.8514
-2.8508	16.5	-11.271	-4.4352	-0.091553
-2.8507	17.68	-4.2216	-3.835	1.0579
-2.8506	4.5369	0.98674	-1.9735	-0.77311
-2.8505	-5.8085	-0.60018	0.13224	-2.5228
-2.8504	-4.3844	1.1698	1.3123	-3.5299
-2.8503	-9.023	-0.43742	-5.1982	0.19328
-2.8502	-2.8788	0.020345	-6.4494	-1.0885
-2.8501	-6.429	0.13224	-6.2561	0.39673
-2.85	-2.004	3.418	-5.0659	8.0872
-2.8499	-1.0274	5.5949	-2.3295	2.8178
-2.8498	-1.2817	8.3822	-0.79346	3.54
-2.8497	-7.609	5.7068	-1.7395	1.1088
-2.8496	-10.834	4.9845	3.1433	0.071208
-2.8495	-7.1818	-0.35604	10.01	-2.4109
-2.8494	-2.3702	-8.9823	10.773	-6.1544
-2.8493	3.3976	-8.9925	-3.2043	-13.062
-2.8492	10.335	-1.4445	-6.4901	-5.3101
-2.8491	8.6161	0.25431	3.6926	7.4158
-2.849	-33.152	1.5055	4.0894	-13.224
-2.8489	-3.9062	-0.83415	1.4242	-5.8289
-2.8488	18.138	-1.3936	2.1159	8.5653
-2.8487	29.755	0.47811	3.479	10.854
-2.8486	17.995	-0.75277	-1.0681	-1.9735
-2.8485	1.0071	-3.9876	-7.3853	-4.7913
-2.8484	-16.012	-6.2154	-9.0434	-4.6183
-2.8483	-10.701	-4.5268	-13.631	-2.7161
-2.8482	-0.010173	-1.8412	-9.4706	0.15259
-2.8481	22.298	2.4923	4.5776	1.4954
-2.848	28.615	1.5055	0.32552	6.1849
-2.8479	-119.14	0.7019	-4.5573	4.4149
-2.8478	-60.699	7.3039	-14.516	-2.8585
-2.8477	16.225	4.3538	-14.16	-2.5838
-2.8476	48.289	-7.6701	6.0832	-1.8209
-2.8475	42.206	-26.194	19.887	-0.62052
-2.8474	18.595	-19.124	25.096	-12.492
-2.8473	7.3344	4.8319	13.652	-4.4657
-2.8472	7.8328	16.388	-26.184	0.030518
-2.8471	6.8054	14.496	-36.041	0.33569
-2.847	1.7904	9.6842	-16.042	0.34587
-2.8469	-1.6073	5.0049	5.4118	-0.44759
-2.8468	-3.4587	1.8311	17.131	11.485
-2.8467	1.5564	5.6254	23.204	10.152
-2.8466	-6.6732	7.2937	-2.299	1.8514
-2.8465	-20.905	10.01	-10.935	-4.954
-2.8464	-11.566	-4.6488	-15.656	-0.091553
-2.8463	0.25431	-44.057	-2.6652	-8.3211
-2.8462	7.5378	-22.156	15.778	-1.6785
-2.8461	9.6842	21.362	26.001	0.34587
-2.846	3.184	13.194	18.463	-3.9876
-2.8459	-11.342	-6.5613	1.8514	-2.5533
-2.8458	0.57983	-3.2145	-13.57	-0.98674
-2.8457	10.885	8.1991	-14.903	-2.0955
-2.8456	6.4596	8.5754	-5.5745	-0.91553
-2.8455	-17.273	8.9417	-14.119	0.88501
-2.8454	-13.448	6.5613	-24.679	-2.4516
-2.8453	1.0274	3.7944	-7.9854	1.5157
-2.8452	3.2654	-3.2959	17.029	8.0058
-2.8451	-9.318	-3.0314	19.786	-2.2786
-2.845	-11.749	-1.8005	17.629	-9.0739
-2.8449	-7.8735	-2.1362	0.50863	-6.0425
-2.8448	-6.6223	-4.1707	-20.223	-7.4972
-2.8447	4.9337	-6.9478	-22.034	-3.774
-2.8446	12.41	-6.7037	-13.448	-1.3428
-2.8445	15.422	0.24414	-2.2786	3.1738
-2.8444	4.3945	-2.9704	5.0252	6.8156
-2.8443	-4.0792	-3.9266	7.4158	4.3132
-2.8442	-18.667	-5.9611	4.4556	0.53914
-2.8441	0.95622	1.0579	7.1818	3.6723
-2.844	11.495	-2.8992	5.3304	0.7019
-2.8439	9.0841	-15.004	-4.6692	-4.4454
-2.8438	-1.8717	0.60018	-10.122	-5.0151
-2.8437	3.0518	7.7515	-2.6347	-2.9093
-2.8436	4.1809	6.9885	-2.4414	-2.004
-2.8435	-21.037	5.5237	0.010173	3.4485
-2.8434	-19.196	3.5807	1.1393	2.6957
-2.8433	0.6307	-6.2764	2.0142	8.1991
-2.8432	5.1982	-19.897	5.9204	6.9377
-2.8431	-2.3193	-18.748	0.91553	-15.442
-2.843	-8.3516	-10.376	-18.626	-15.747
-2.8429	-22.786	-1.5767	-25.777	-3.8045
-2.8428	-10.966	5.0354	-21.739	5.2897
-2.8427	-1.6785	7.0394	-4.3844	15.045
-2.8426	13.774	4.4352	17.649	9.3689
-2.8425	16.154	2.7771	13.357	-2.828
-2.8424	14.435	1.5869	10.986	-6.4494
-2.8423	18.697	11.332	8.9213	0.020345
-2.8422	17.069	8.4635	4.0487	1.1495
-2.8421	13.031	1.5666	0.33569	1.6174
-2.842	7.0496	3.2552	5.717	0.33569
-2.8419	2.2278	5.6559	11.729	-5.1575
-2.8418	-4.1606	3.4485	7.3751	4.9438
-2.8417	-0.83415	0.86466	-1.6785	-0.50863
-2.8416	0.84432	-7.6396	-1.5767	-8.8704
-2.8415	-37.425	-6.5715	-6.0323	-3.4281
-2.8414	-24.302	-9.9589	-10.183	0.15259
-2.8413	-7.192	-6.7139	-11.027	-8.2499
-2.8412	5.778	-8.3923	-15.015	-7.7616
-2.8411	7.0496	-3.1637	-8.5144	-4.9235
-2.841	3.5909	4.4454	-3.3264	-3.5909
-2.8409	2.6042	4.4657	5.3609	-0.10173
-2.8408	0.34587	-2.0447	5.3507	6.958
-2.8407	-2.5024	-2.2481	12.858	6.4087
-2.8406	-9.1451	1.4954	9.2367	8.2092
-2.8405	-11.871	4.8625	-26.52	9.3384
-2.8404	-10.569	0.61035	-15.594	-8.4432
-2.8403	-3.2043	-0.89518	2.0345	-14.404
-2.8402	-3.418	2.4618	23.763	-4.0792
-2.8401	0.73242	0.88501	23.417	3.4485
-2.84	1.3631	1.8819	22.888	5.7576
-2.8399	5.0964	6.0425	5.2592	4.5776
-2.8398	7.3242	5.9713	-47.577	3.9368
-2.8397	6.6935	-4.2623	-45.919	7.9142
-2.8396	2.8585	-13.682	-18.494	1.7293
-2.8395	-3.3773	-13.936	1.5361	0.56966
-2.8394	-11.434	-7.8634	25.004	-9.1044
-2.8393	-4.9235	-10.529	28.788	-5.7678
-2.8392	-1.3936	-4.9642	16.978	-4.4454
-2.8391	2.8992	6.9173	0.69173	1.414
-2.839	4.3233	9.5215	-7.4768	5.9408
-2.8389	5.0252	0.57983	-11.749	-0.31535
-2.8388	-1.8005	2.7873	-11.729	-0.30518
-2.8387	-13.519	-0.19328	-8.8704	1.6073
-2.8386	-12.746	3.245	-7.253	1.6479
-2.8385	-0.62052	1.3428	-2.8483	2.889
-2.8384	8.5449	0.75277	9.0434	-1.0173
-2.8383	15.279	-1.1597	8.3415	-3.7231
-2.8382	13.306	-0.13224	4.5675	-2.1871
-2.8381	7.0903	-1.7904	-4.1606	-6.5715
-2.838	5.5847	2.4312	-14.15	-2.5533
-2.8379	3.3061	4.6997	-10.427	3.7435
-2.8378	-11.8	5.5847	-1.6174	2.6347
-2.8377	-19.46	-5.1168	3.3264	-5.1473
-2.8376	-20.416	-5.8289	5.3609	-1.2716
-2.8375	-4.1504	-12.41	4.6285	-0.34587
-2.8374	10.966	-0.4069	4.893	-8.1075
-2.8373	16.764	4.5573	10.976	-2.9093
-2.8372	10.885	4.9133	6.0018	1.2105
-2.8371	3.4281	-7.0292	-26.113	1.3224
-2.837	-1.9531	-10.966	-24.343	4.2216
-2.8369	-1.18	6.5206	-8.7585	2.1769
-2.8368	-3.2857	9.7351	10.386	2.6042
-2.8367	13.855	7.7108	14.038	7.1004
-2.8366	11.444	4.4759	6.9682	-2.2176
-2.8365	-11.495	7.2937	-0.80363	-9.8775
-2.8364	-17.588	-1.6785	-4.5573	-10.61
-2.8363	-14.303	-5.9713	3.9673	-8.1278
-2.8362	-2.6347	-7.6192	7.9447	0.24414
-2.8361	-4.13	-11.912	7.2632	6.724
-2.836	-7.609	-8.8298	5.3914	1.5462
-2.8359	-5.4118	-1.6073	2.1667	9.3079
-2.8358	-8.3516	-2.7466	-0.9257	9.1451
-2.8357	3.54	-1.709	-8.9315	-0.56966
-2.8356	6.6732	7.3853	-7.4259	-9.023
-2.8355	5.2287	1.5361	-3.1026	-12.919
-2.8354	3.6214	-7.3751	-3.7028	-0.33569
-2.8353	2.4516	-3.3671	1.3428	3.8859
-2.8352	2.8076	1.3733	11.332	3.123
-2.8351	7.487	6.9682	10.925	-11.363
-2.835	9.7961	11.017	4.9337	-6.5002
-2.8349	5.4728	4.6997	-0.32552	-2.1566
-2.8348	-0.020345	3.4281	-8.1177	1.1495
-2.8347	-0.62052	3.54	-7.9956	4.7709
-2.8346	-5.3813	1.2919	-14.974	5.3813
-2.8345	-3.4688	4.5573	-6.3782	-1.8921
-2.8344	12.522	-1.5259	-1.6073	0.45776
-2.8343	36.692	-3.9368	-2.36	-2.9297
-2.8342	-97.555	-3.9876	-1.3529	-8.8603
-2.8341	-100.87	-7.6803	-4.8319	-5.5847
-2.834	30.162	-10.549	-3.7231	-1.9531
-2.8339	63.649	-7.7006	0.67139	4.7811
-2.8338	40.293	-3.3976	-3.3162	6.8156
-2.8337	14.923	-0.64087	-1.3123	6.2459
-2.8336	-5.3202	4.6285	3.3671	7.9346
-2.8335	-4.8421	2.6652	-0.99691	6.0628
-2.8334	0.93587	0.67139	2.4007	4.6082
-2.8333	-1.9023	3.5197	3.0009	9.4503
-2.8332	-6.6325	0.43742	-2.2685	16.286
-2.8331	-5.4626	-3.5807	1.8717	-34.21
-2.833	-2.8178	-7.0394	1.3021	-42.277
-2.8329	-0.16276	-7.4158	1.1495	-12.889
-2.8328	-2.1261	-2.0955	-0.54932	12.553
-2.8327	2.9399	3.4892	-0.93587	26.011
-2.8326	3.4281	2.9195	-5.5542	24.221
-2.8325	-0.79346	2.5431	-7.3446	6.2866
-2.8324	-13.173	5.6254	-2.2176	-3.7231
-2.8323	-7.0394	-0.31535	-0.67139	-8.3516
-2.8322	4.2725	-1.0986	-0.2238	-6.663
-2.8321	9.5113	0.72225	-4.4454	-5.5847
-2.832	11.983	-1.4038	-8.2499	-13.682
-2.8319	7.5887	1.2919	1.5361	-6.134
-2.8318	2.5533	1.0783	8.0363	8.5246
-2.8317	-4.4149	-0.82397	9.3689	4.5776
-2.8316	-17.965	-5.5033	4.4657	-3.0619
-2.8315	-4.893	-9.9487	-6.5002	-2.8687
-2.8314	-5.6356	-10.579	-5.5847	1.2105
-2.8313	-26.703	-4.3945	-3.8961	-3.9673
-2.8312	2.1871	1.3529	3.5197	-11.78
-2.8311	-4.8726	2.9093	3.6418	-17.11
-2.831	-18.931	4.1504	1.1393	-12.227
-2.8309	2.1973	5.7576	-2.4821	-4.9235
-2.8308	11.525	4.659	-4.5064	0.34587
-2.8307	19.043	2.7974	-4.0385	9.847
-2.8306	10.681	6.6223	0.56966	16.907
-2.8305	0.94604	1.5564	-3.0518	15.91
-2.8304	-8.0261	2.1769	-1.6581	7.4972
-2.8303	-5.9916	-5.0964	2.3905	-1.414
-2.8302	-3.5706	-18.443	16.378	-4.6183
-2.8301	1.1292	-19.267	-8.3415	-2.7771
-2.83	-4.6488	-8.5347	-22.43	-1.9938
-2.8299	-8.9213	0.85449	-13.397	0.77311
-2.8298	-8.2499	9.6537	1.1292	2.2481
-2.8297	0.071208	9.8674	5.6051	5.6152
-2.8296	-5.1168	12.98	13.346	3.2145
-2.8295	2.9806	2.8992	5.9204	-5.3711
-2.8294	12.553	-18.036	-2.4312	-8.4025
-2.8293	4.9642	-8.7585	1.5259	-4.5369
-2.8292	-4.0283	4.954	3.5299	-4.7607
-2.8291	5.9102	6.6121	-13.295	-4.5675
-2.829	5.0252	2.7364	-13.072	-1.6174
-2.8289	13.418	10.427	-7.5887	-0.30518
-2.8288	9.3994	0.25431	-2.2074	3.7638
-2.8287	13.418	-7.1513	11.841	2.4414
-2.8286	19.725	-7.2021	16.53	-2.7059
-2.8285	-32.135	-8.5246	9.4503	1.5361
-2.8284	-31.667	-1.6683	-11.485	6.5002
-2.8283	-5.4525	9.0841	-33.966	-13.438
-2.8282	11.251	3.5706	-20.894	-28.005
-2.8281	13.784	2.9704	-4.4556	-15.696
-2.828	-25.726	6.1951	6.8258	1.2207
-2.8279	-24.363	2.6652	15.401	14.262
-2.8278	-14.679	0.35604	8.8908	16.602
-2.8277	7.9549	0.78328	-7.2734	12.248
-2.8276	19.582	-4.5675	-4.7302	4.2114
-2.8275	15.594	-9.8674	1.4242	0.99691
-2.8274	-9.0841	-7.7616	2.6347	-0.68156
-2.8273	6.1544	-6.8461	5.8187	4.4149
-2.8272	14.435	-4.3742	3.9062	-1.2919
-2.8271	9.1248	-3.123	3.2959	-4.2826
-2.827	-7.4361	-2.3193	3.6519	-3.1331
-2.8269	3.9368	5.9611	-6.2866	-8.2804
-2.8268	1.7904	3.8452	-12.533	0.50863
-2.8267	-2.3499	1.8819	-2.0447	5.0863
-2.8266	1.2309	3.835	4.8523	-0.84432
-2.8265	-0.16276	-1.8921	14.048	-3.2756
-2.8264	-1.2512	-2.7669	10.915	-0.20345
-2.8263	-21.077	2.3295	10.437	0.19328
-2.8262	-16.51	-2.655	0.82397	-0.65104
-2.8261	-2.3804	-8.2601	-8.6772	-4.1504
-2.826	5.7678	-3.184	0.50863	-8.311
-2.8259	6.3985	-3.1128	6.5918	2.5126
-2.8258	3.774	-0.78328	-6.7342	7.548
-2.8257	5.483	3.8554	-6.9885	-5.9713
-2.8256	1.4343	4.4454	-6.134	-8.5449
-2.8255	-2.1362	4.0588	-7.9956	-6.7647
-2.8254	1.2512	7.6396	-4.1199	1.0274
-2.8253	-0.295	2.8585	-1.0274	13.865
-2.8252	-7.5073	2.2786	8.077	11.597
-2.8251	-2.1464	-1.2919	6.3782	5.127
-2.825	-3.6926	-3.184	-15.564	3.5807
-2.8249	-7.7616	-5.4118	-23.875	-4.3538
-2.8248	-7.192	-4.4047	-16.357	-6.8054
-2.8247	-0.12207	-6.6325	-1.0274	-1.1902
-2.8246	6.012	-3.6825	7.9346	-3.713
-2.8245	-7.3649	2.7873	10.803	-5.6356
-2.8244	-4.2419	4.1097	3.2959	1.1698
-2.8243	-18.86	1.7395	-4.0588	-0.36621
-2.8242	-13.499	0	-4.659	-6.3477
-2.8241	5.9408	-4.1606	-9.1146	-6.2866
-2.824	14.862	0.32552	-8.3822	-5.5542
-2.8239	0.36621	-5.4626	-4.8726	-2.6347
-2.8238	9.8165	-8.8399	-3.6825	1.3123
-2.8237	11.241	-7.4565	1.0274	0.68156
-2.8236	0.50863	-2.8992	-1.2207	-0.26449
-2.8235	2.8178	1.2512	-4.659	2.0447
-2.8234	7.8634	8.0261	-2.6855	5.1371
-2.8233	11.149	-12.817	-3.5502	5.4423
-2.8232	12.797	-17.415	-7.5989	1.1495
-2.8231	5.0151	0.32552	-6.6427	-0.59001
-2.823	-3.1128	8.8196	-1.3733	-4.9133
-2.8229	-6.897	4.7913	0.72225	-8.3211
-2.8228	-6.012	4.1911	0.97656	-9.908
-2.8227	-4.3437	6.2256	2.004	-1.5361
-2.8226	-5.3406	5.7983	5.0761	7.1513
-2.8225	-6.2968	2.065	3.0314	3.4281
-2.8224	-3.1637	-2.8381	-4.13	-7.7311
-2.8223	-4.9744	-1.6785	4.13	-5.0252
-2.8222	-13.051	-1.7802	13.031	8.4432
-2.8221	-0.7019	4.8014	14.313	12.96
-2.822	14.323	7.4565	12.787	11.444
-2.8219	12.817	-5.717	6.5308	7.8023
-2.8218	3.7638	-17.975	-9.2672	10.193
-2.8217	-0.45776	-5.2185	-24.953	2.6143
-2.8216	-2.7771	8.5246	-17.303	-0.42725
-2.8215	-13.011	8.1787	-15.91	-5.3304
-2.8214	-17.629	3.2349	-2.6449	-5.8187
-2.8213	-13.682	3.2857	10.844	-6.7647
-2.8212	-4.069	-2.4516	16.5	-8.7789
-2.8211	-14.252	1.5564	8.7484	-8.3211
-2.821	-5.6864	2.5736	6.307	-6.0933
-2.8209	7.6396	-1.4038	3.3366	-2.594
-2.8208	7.9549	-2.6957	0.42725	-0.13224
-2.8207	0.90535	-4.5776	-0.52897	3.5197
-2.8206	0.91553	-8.7484	-0.091553	1.7497
-2.8205	-16.744	-2.3092	4.8523	-1.2004
-2.8204	-5.8085	-3.1738	12.421	-1.1698
-2.8203	5.5339	-1.709	6.4189	0.33569
-2.8202	9.0129	-0.35604	-0.36621	3.4587
-2.8201	13.214	-2.4414	-13.204	2.6143
-2.82	10.935	0.35604	-4.7913	1.1902
-2.8199	1.4852	1.5055	1.5666	-1.3123
-2.8198	-8.901	-2.0142	3.1026	-2.1362
-2.8197	-5.5542	2.5736	6.5002	-5.7475
-2.8196	-1.8311	5.6864	5.3406	-1.3123
-2.8195	0.69173	2.0549	-5.5949	-6.4087
-2.8194	4.1707	3.184	-10.976	-9.7758
-2.8193	4.4861	3.5197	-20.304	-5.7983
-2.8192	-2.6449	-0.54932	-13.011	-7.4565
-2.8191	-4.0588	0.24414	3.3976	-1.2817
-2.819	-0.5188	6.5511	6.6935	4.0283
-2.8189	5.5237	-5.9814	7.2632	0.38656
-2.8188	6.5511	-22.349	12.96	3.8859
-2.8187	1.6378	-21.922	-17.08	12.268
-2.8186	1.9531	-7.5989	-37.465	7.3649
-2.8185	0.53914	2.8788	-21.576	7.7616
-2.8184	4.364	6.3171	1.6174	3.4281
-2.8183	5.6661	-6.3375	22.268	1.6886
-2.8182	7.4158	-0.6307	24.089	-1.2716
-2.8181	5.0252	14.882	26.143	-1.3835
-2.818	-4.2114	14.496	16.083	-3.8656
-2.8179	-20.691	15.717	4.8014	3.0314
-2.8178	-14.445	10.559	-20.477	0.90535
-2.8177	-6.1137	3.6621	-31.433	-8.2092
-2.8176	0.7019	1.7802	-29.541	-6.6528
-2.8175	11.363	-7.3954	-18.626	-8.7789
-2.8174	15.116	-10.854	6.5104	-8.7585
-2.8173	10.895	-6.8665	17.222	0.98674
-2.8172	3.4892	-2.1057	15.218	3.9876
-2.8171	-21.25	-1.8616	10.763	-9.1654
-2.817	-25.187	-0.74259	9.5215	-20.945
-2.8169	-10.651	2.889	6.7851	-5.2999
-2.8168	-14.567	2.6347	-3.5095	16.205
-2.8167	2.8381	-0.79346	-13.702	12.614
-2.8166	17.456	-9.1146	-10.01	10.905
-2.8165	17.955	-7.3751	-12.787	11.21
-2.8164	10.966	-1.0783	-15.086	13.865
-2.8163	-4.1504	0.08138	-1.2207	-0.62052
-2.8162	1.6886	1.5361	-6.3985	-10.976
-2.8161	5.0456	2.7669	-12.278	-9.0434
-2.816	4.8218	1.4547	4.1809	5.5135
-2.8159	-9.491	-1.414	13.102	10.681
-2.8158	-20.121	0.76294	7.8227	-18.178
-2.8157	-3.6519	-0.97656	9.6944	-26.133
-2.8156	1.5869	-6.6427	-0.50863	-26.479
-2.8155	-3.6214	-15.137	-3.8757	-11.831
-2.8154	-4.1809	-4.9744	4.0385	13.885
-2.8153	-10.417	0.33569	-2.2278	23.58
-2.8152	-15.849	3.3671	6.3273	20.386
-2.8151	-5.5644	2.4719	11.678	6.0832
-2.815	12.421	4.3945	6.5409	-4.1097
-2.8149	14.526	8.3923	2.7669	-4.5471
-2.8148	2.0955	6.3273	2.5736	-17.171
-2.8147	-4.5573	-3.9266	-4.364	-12.431
-2.8146	-1.2512	-4.8014	-7.314	6.4494
-2.8145	-0.030518	-2.3092	-1.7395	13.234
-2.8144	-2.0243	0.59001	0.020345	18.901
-2.8143	-3.245	1.8005	1.2105	8.7789
-2.8142	-1.9735	0.16276	-30.843	-0.54932
-2.8141	-4.4149	-0.65104	-32.155	-43.488
-2.814	-10.569	-0.55949	-12.716	-36.967
-2.8139	-4.069	-4.2928	6.9478	-9.0434
-2.8138	1.0885	-1.2817	15.472	14.455
-2.8137	-1.4242	3.9266	19.908	29.958
-2.8136	-4.5471	-1.9531	13.55	28.788
-2.8135	-1.7598	-1.18	-6.073	2.2786
-2.8134	2.594	-0.19328	-23.438	-16.927
-2.8133	5.5237	-5.0151	-20.467	-6.0425
-2.8132	2.9806	-2.5228	-11.139	-5.9916
-2.8131	0.31535	5.0151	5.7068	-21.739
-2.813	3.9775	4.6387	14.384	-15.004
-2.8129	1.2512	2.2278	14.974	5.7576
-2.8128	3.8045	6.7749	10.457	16.897
-2.8127	5.4016	-8.8501	5.5745	8.7789
-2.8126	-1.6886	-24.221	-0.33569	8.4737
-2.8125	1.2919	-29.165	0.71208	3.7231
-2.8124	6.2459	-5.4423	0.50863	-0.78328
-2.8123	-4.2114	10.02	1.77	3.2959
-2.8122	3.5604	6.663	3.54	6.3782
-2.8121	2.5533	-13.702	-4.2419	6.2052
-2.812	-11.017	5.7475	-8.6772	4.2928
-2.8119	-13.346	25.665	-11.861	1.5564
-2.8118	1.8819	23.315	-15.544	-6.9885
-2.8117	7.5378	2.7262	-15.35	-4.5776
-2.8116	5.5644	-7.0801	-6.9987	-3.2552
-2.8115	3.4587	-5.2694	1.1495	-6.3883
-2.8114	2.065	-0.55949	5.7271	-0.94604
-2.8113	-2.594	3.3366	6.2052	1.0579
-2.8112	1.9735	4.598	1.2105	-8.1177
-2.8111	1.7598	2.6143	-1.3936	-5.5237
-2.811	-16.062	-1.5259	2.5228	-3.8757
-2.8109	-30.609	-5.778	-0.71208	-8.1584
-2.8108	-7.1716	-4.3233	-0.93587	-7.6497
-2.8107	16.652	1.2817	-0.54932	-2.5228
-2.8106	15.259	1.7904	0.35604	3.774
-2.8105	10.122	-1.7904	4.9133	1.9938
-2.8104	7.7515	-5.0659	6.307	-0.73242
-2.8103	-3.8961	-3.5095	-1.6174	2.889
-2.8102	-17.721	-7.2734	-1.7497	1.9226
-2.8101	-2.5431	-8.8806	-3.0212	7.5989
-2.81	6.6223	-6.6732	-11.129	6.9478
-2.8099	8.4025	-7.8023	-15.188	5.1473
-2.8098	11.108	-4.659	-6.3985	-3.1942
-2.8097	7.6497	5.0456	1.2716	-3.0111
-2.8096	-2.8788	5.9916	2.0752	-0.52897
-2.8095	-11.922	7.8227	4.3132	-11.922
-2.8094	-8.7992	7.0496	0.74259	-11.302
-2.8093	-5.1168	0.82397	1.0376	-12.278
-2.8092	1.6378	-0.53914	11.729	-2.9093
-2.8091	5.9611	0.39673	11.139	10.284
-2.809	3.6519	-1.5666	3.8757	14.567
-2.8089	2.3499	-5.9814	-0.86466	14.201
-2.8088	1.7192	-4.1707	-4.0283	5.1473
-2.8087	0.23397	-2.5228	-5.1066	-4.8218
-2.8086	-5.3711	-4.069	-10.335	-6.1951
-2.8085	-2.5431	0.96639	-5.7068	-1.241
-2.8084	-7.314	-0.49845	-2.1464	-3.6214
-2.8083	-18.738	-3.3162	-0.54932	-3.6926
-2.8082	-7.9753	-1.2817	0.69173	-2.4414
-2.8081	-0.31535	1.8514	5.6458	-6.5918
-2.808	-7.4463	0.35604	3.6418	-7.8125
-2.8079	-0.17293	-4.13	-1.8209	-3.8554
-2.8078	-1.6886	-3.8656	-8.2296	0.61035
-2.8077	-4.2928	5.1676	-4.9032	3.0009
-2.8076	0.30518	14.323	-10.203	8.4635
-2.8075	10.752	0.39673	-2.5228	8.8603
-2.8074	10.356	-4.8116	-1.8921	-1.4852
-2.8073	-0.18311	-2.5126	-2.0549	-0.17293
-2.8072	-8.5144	2.6042	5.9001	5.0151
-2.8071	7.4158	8.8908	7.1716	4.5369
-2.807	15.066	8.7382	3.2857	4.8014
-2.8069	14.659	8.0668	3.3569	-8.372
-2.8068	-0.25431	-5.5644	-0.76294	-17.466
-2.8067	-25.838	-9.3384	-3.0518	-17.598
-2.8066	-15.737	-3.8961	1.3835	-6.2866
-2.8065	-3.6214	-5.1982	1.2512	6.6528
-2.8064	-2.8381	-4.2928	-5.7983	12.95
-2.8063	-11.587	-5.0354	-1.7395	8.7484
-2.8062	5.4728	3.479	-1.0885	-3.6112
-2.8061	8.6263	1.8005	-6.1239	-9.1654
-2.806	8.3415	-0.295	-4.7404	-1.475
-2.8059	9.2875	-11.444	1.0579	5.4728
-2.8058	-5.0151	-5.2999	-1.4242	0.18311
-2.8057	-1.6174	0.04069	4.4047	2.9195
-2.8056	-10.173	3.3875	4.8625	8.1889
-2.8055	-14.384	0.5188	1.5767	0.69173
-2.8054	-4.5268	2.3804	5.5033	-0.44759
-2.8053	9.1654	0.73242	-2.4516	5.9814
-2.8052	4.6488	0.14242	2.6245	3.0416
-2.8051	2.3702	0.55949	8.433	3.4587
-2.805	6.2764	0.9257	9.0027	-4.364
-2.8049	5.1575	-0.99691	5.3304	-7.253
-2.8048	3.479	-10.417	-9.196	-1.7497
-2.8047	-18.534	-7.1309	-28.107	-4.8421
-2.8046	-8.311	-7.9142	-17.202	-3.8249
-2.8045	-1.8616	-4.2318	-7.8735	0.35604
-2.8044	1.6276	-1.9938	-9.1451	0.80363
-2.8043	4.2013	2.5838	-2.9907	0.65104
-2.8042	6.663	4.659	8.5653	2.7161
-2.8041	4.303	9.5825	14.058	-8.1177
-2.804	-12.014	10.193	17.202	-6.663
-2.8039	-28.727	3.0518	16.184	-1.0783
-2.8038	-10.722	-5.778	-24.363	3.3875
-2.8037	12.777	-18.595	-30.08	3.1433
-2.8036	25.848	-10.244	-13.499	7.9549
-2.8035	15.839	1.6683	5.483	-6.073
-2.8034	8.7077	10.661	16.968	-19.674
-2.8033	4.9744	0.04069	12.095	-7.0597
-2.8032	0.66121	-5.7271	1.0579	1.414
-2.8031	-4.0792	9.1654	3.1331	4.6387
-2.803	2.9195	8.7179	6.1544	0.061035
-2.8029	6.5308	1.0986	7.9651	1.8616
-2.8028	0.52897	-9.5723	5.0863	2.2176
-2.8027	0.95622	-14.506	-5.0151	3.9876
-2.8026	-6.5104	-2.828	-9.1349	6.0425
-2.8025	-26.143	2.8992	-11.017	7.4056
-2.8024	-19.165	3.5502	-6.9885	-9.0129
-2.8023	-3.54	3.2654	-0.38656	-20.365
-2.8022	3.2959	3.4587	-1.4547	-12.644
-2.8021	5.127	4.1199	-6.0323	-1.6073
-2.802	3.7231	4.4963	-0.61035	6.7546
-2.8019	-1.5259	6.6935	4.598	18.25
-2.8018	-10.101	5.7882	9.6334	16.652
-2.8017	-3.6519	6.8054	8.5754	7.6497
-2.8016	5.0049	6.4697	0.89518	1.4954
-2.8015	6.8563	1.943	-14.313	-1.0681
-2.8014	4.3945	-7.2937	-8.4737	1.3631
-2.8013	1.0173	-21.077	1.3835	-4.8116
-2.8012	-0.64087	-21.474	3.1942	-13.051
-2.8011	2.4923	-9.7148	1.7598	-8.2499
-2.801	8.606	2.1362	2.3804	0.84432
-2.8009	-7.5684	4.9947	-17.507	-4.13
-2.8008	-3.4688	2.065	-20.996	-6.7952
-2.8007	9.9792	-1.3835	-1.0071	1.6073
-2.8006	-3.6011	-3.5095	-3.3366	0.44759
-2.8005	-6.8054	-1.2512	-1.9124	2.6754
-2.8004	4.0283	3.8452	6.2866	5.0151
-2.8003	-8.372	8.7484	7.9549	0.020345
-2.8002	-29.785	6.1646	10.732	-0.78328
-2.8001	8.1685	7.5785	3.2349	-2.0955
[truncated: 30,501 more rows]

## Sheet: Fig3D
-2	0	0	0	0	0	0	0	0	0	0	0	0
-1.9996	0	0	0	0	0	0	0	0	0	0	0	0
-1.9992	0	0	0	0	0	0	0	0	0	0	0	0
-1.9988	0	0	0	0	0	0	0	0	0	0	0	0
-1.9984	0	0	0	0	0	0	0	0	0	0	0	0
-1.998	0	0	0	0	0	0	0	0	0	0	0	0
-1.9976	0	0	0	0	0	0	0	0	0	0	0	0
-1.9972	0	0	0	0	0	0	0	0	0	0	0	0
-1.9968	0	0	0	0	0	0	0	0	0	0	0	0
-1.9964	0	0	0	0	0	0	0	0	0	0	0	0
-1.996	0	0	0	0	0	0	0	0	0	0	0	0
-1.9956	0	0	0	0	0	0	0	0	0	0	0	0
-1.9952	0	0	0	0	0	0	0	0	0	0	0	0
-1.9948	0	0	0	0	0	0	0	0	0	0	0	0
-1.9944	0	0	0	0	0	0	0	0	0	0	0	0
-1.994	0	0	0	0	0	0	0	0	0	0	0	0
-1.9936	0	0	0	0	0	0	0	0	0	0	0	0
-1.9932	0	0	0	0	0	0	0	0	0	0	0	0
-1.9928	0	0	0	0	0	0	0	0	0	0	0	0
-1.9924	0	0	0	0	0	0	0	0	0	0	0	0
-1.992	0	0	0	0	0	0	0	0	0	0	0	0
-1.9916	0	0	0	0	0	0	0	0	0	0	0	0
-1.9912	0	0	0	0	0	0	0	0	0	0	0	0
-1.9908	0	0	0	0	0	0	0	0	0	0	0	0
-1.9904	0	0	0	0	0	0	0	0	0	0	0	0
-1.99	0	0	0	0	0	0	0	0	0	0	0	0
-1.9896	0	0	0	0	0	0	0	0	0	0	0	0
-1.9892	0	0	0	0	0	0	0	0	0	0	0	0
-1.9888	0	0	0	0	0	0	0	0	0	0	0	0
-1.9884	0	0	0	0	0	0	0	0	0	0	0	0
-1.988	0	0	0	0	0	0	0	0	0	0	0	0
-1.9876	0	0	0	0	0	0	0	0	0	0	0	0
-1.9872	0	0	0	0	0	0	0	0	0	0	0	0
-1.9868	0	0	0	0	0	0	0	0	0	0	0	0
-1.9864	0	0	0	0	0	0	0	0	0	0	0	0
-1.986	0	0	0	0	0	0	0	0	0	0	0	0
-1.9856	0	0	0	0	0	0	0	0	0	0	0	0
-1.9852	0	0	0	0	0	0	0	0	0	0	0	0
-1.9848	0	0	0	0	0	0	0	0	0	0	0	0
-1.9844	0	0	0	0	0	0	0	0	0	0	0	0
-1.984	0	0	0	0	0	0	0	0	0	0	0	0
-1.9836	0	0	0	0	0	0	0	0	0	0	0	0
-1.9832	0	0	0	0	0	0	0	0	0	0	0	0
-1.9828	0	0	0	0	0	0	0	0	0	0	0	0
-1.9824	0	0	0	0	0	0	0	0	0	0	0	0
-1.982	0	0	0	0	0	0	0	0	0	0	0	0
-1.9816	0	0	0	0	0	0	0	0	0	0	0	0
-1.9812	0	0	0	0	0	0	0	0	0	0	0	0
-1.9808	0	0	0	0	0	0	0	0	0	0	0	0
-1.9804	0	0	0	0	0	0	0	0	0	0	0	0
-1.98	0	0	0	0	0	0	0	0	0	0	0	0
-1.9796	0	0	0	0	0	0	0	0	0	0	0	0
-1.9792	0	0	0	0	0	0	0	0	0	0	0	0
-1.9788	0	0	0	0	0	0	0	0	0	0	0	0
-1.9784	0	0	0	0	0	0	0	0	0	0	0	0
-1.978	0	0	0	0	0	0	0	0	0	0	0	0
-1.9776	0	0	0	0	0	0	0	0	0	0	0	0
-1.9772	0	0	0	0	0	0	0	0	0	0	0	0
-1.9768	0	0	0	0	0	0	0	0	0	0	0	0
-1.9764	0	0	0	0	0	0	0	0	0	0	0	0
-1.976	0	0	0	0	0	0	0	0	0	0	0	0
-1.9756	0	0	0	0	0	0	0	0	0	0	0	0
-1.9752	0	0	0	0	0	0	0	0	0	0	0	0
-1.9748	0	0	0	0	0	0	0	0	0	0	0	0
-1.9744	0	0	0	0	0	0	0	0	0	0	0	0
-1.9741	0	0	0	0	0	0	0	0	0	0	0	0
-1.9737	0	0	0	0	0	0	0	0	0	0	0	0
-1.9733	0	0	0	0	0	0	0	0	0	0	0	0
-1.9729	0	0	0	0	0	0	0	0	0	0	0	0
-1.9725	0	0	0	0	0	0	0	0	0	0	0	0
-1.9721	0	0	0	0	0	0	0	0	0	0	0	0
-1.9717	0	0	0	0	0	0	0	0	0	0	0	0
-1.9713	0	0	0	0	0	0	0	0	0	0	0	0
-1.9709	0	0	0	0	0	0	0	0	0	0	0	0
-1.9705	0	0	0	0	0	0	0	0	0	0	0	0
-1.9701	0	0	0	0	0	0	0	0	0	0	0	0
-1.9697	0	0	0	0	0	0	0	0	0	0	0	0
-1.9693	0	0	0	0	0	0	0	0	0	0	0	0
-1.9689	0	0	0	0	0	0	0	0	0	0	0	0
-1.9685	0	0	0	0	0	0	0	0	0	0	0	0
-1.9681	0	0	0	0	0	0	0	0	0	0	0	0
-1.9677	0	0	0	0	0	0	0	0	0	0	0	0
-1.9673	0	0	0	0	0	0	0	0	0	0	0	0
-1.9669	0	0	0	0	0	0	0	0	0	0	0	0
-1.9665	0	0	0	0	0	0	0	0	0	0	0	0
-1.9661	0	0	0	0	0	0	0	0	0	0	0	0
-1.9657	0	0	0	0	0	0	0	0	0	0	0	0
-1.9653	0	0	0	0	0	0	0	0	0	0	0	0
-1.9649	0	0	0	0	0	0	0	0	0	0	0	0
-1.9645	0	0	0	0	0	0	0	0	0	0	0	0
-1.9641	0	0	0	0	0	0	0	0	0	0	0	0
-1.9637	0	0	0	0	0	0	0	0	0	0	0	0
-1.9633	0	0	0	0	0	0	0	0	0	0	0	0
-1.9629	0	0	0	0	0	0	0	0	0	0	0	0
-1.9625	0	0	0	0	0	0	0	0	0	0	0	0
-1.9621	0	0	0	0	0	0	0	0	0	0	0	0
-1.9617	0	0	0	0	0	0	0	0	0	0	0	0
-1.9613	0	0	0	0	0	0	0	0	0	0	0	0
-1.9609	0	0	0	0	0	0	0	0	0	0	0	0
-1.9605	0	0	0	0	0	0	0	0	0	0	0	0
-1.9601	0	0	0	0	0	0	0	0	0	0	0	0
-1.9597	0	0	0	0	0	0	0	0	0	0	0	0
-1.9593	0	0	0	0	0	0	0	0	0	0	0	0
-1.9589	0	0	0	0	0	0	0	0	0	0	0	0
-1.9585	0	0	0	0	0	0	0	0	0	0	0	0
-1.9581	0	0	0	0	0	0	0	0	0	0	0	0
-1.9577	0	0	0	0	0	0	0	0	0	0	0	0
-1.9573	0	0	0	0	0	0	0	0	0	0	0	0
-1.9569	0	0	0	0	0	0	0	0	0	0	0	0
-1.9565	0	0	0	0	0	0	0	0	0	0	0	0
-1.9561	0	0	0	0	0	0	0	0	0	0	0	0
-1.9557	0	0	0	0	0	0	0	0	0	0	0	0
-1.9553	0	0	0	0	0	0	0	0	0	0	0	0
-1.9549	0	0	0	0	0	0	0	0	0	0	0	0
-1.9545	0	0	0	0	0	0	0	0	0	0	0	0
-1.9541	0	0	0	0	0	0	0	0	0	0	0	0
-1.9537	0	0	0	0	0	0	0	0	0	0	0	0
-1.9533	0	0	0	0	0	0	0	0	0	0	0	0
-1.9529	0	0	0	0	0	0	0	0	0	0	0	0
-1.9525	0	0	0	0	0	0	0	0	0	0	0	0
-1.9521	0	0	0	0	0	0	0	0	0	0	0	0
-1.9517	0	0	0	0	0	0	0	0	0	0	0	0
-1.9513	0	0	0	0	0	0	0	0	0	0	0	0
-1.9509	0	0	0	0	0	0	0	0	0	0	0	0
-1.9505	0	0	0	0	0	0	0	0	0	0	0	0
-1.9501	0	0	0	0	0	0	0	0	0	0	0	0
-1.9497	0	0	0	0	0	0	0	0	0	0	0	0
-1.9493	0	0	0	0	0	0	0	0	0	0	0	0
-1.9489	0	0	0	0	0	0	0	0	0	0	0	0
-1.9485	0	0	0	0	0	0	0	0	0	0	0	0
-1.9481	0	0	0	0	0	0	0	0	0	0	0	0
-1.9477	0	0	0	0	0	0	0	0	0	0	0	0
-1.9473	0	0	0	0	0	0	0	0	0	0	0	0
-1.9469	0	0	0	0	0	0	0	0	0	0	0	0
-1.9466	0	0	0	0	0	0	0	0	0	0	0	0
-1.9462	0	0	0	0	0	0	0	0	0	0	0	0
-1.9458	0	0	0	0	0	0	0	0	0	0	0	0
-1.9454	0	0	0	0	0	0	0	0	0	0	0	0
-1.945	0	0	0	0	0	0	0	0	0	0	0	0
-1.9446	0	0	0	0	0	0	0	0	0	0	0	0
-1.9442	0	0	0	0	0	0	0	0	0	0	0	0
-1.9438	0	0	0	0	0	0	0	0	0	0	0	0
-1.9434	0	0	0	0	0	0	0	0	0	0	0	0
-1.943	0	0	0	0	0	0	0	0	0	0	0	0
-1.9426	0	0	0	0	0	0	0	0	0	0	0	0
-1.9422	0	0	0	0	0	0	0	0	0	0	0	0
-1.9418	0	0	0	0	0	0	0	0	0	0	0	0
-1.9414	0	0	0	0	0	0	0	0	0	0	0	0
-1.941	0	0	0	0	0	0	0	0	0	0	0	0
-1.9406	0	0	0	0	0	0	0	0	0	0	0	0
-1.9402	0	0	0	0	0	0	0	0	0	0	0	0
-1.9398	0	0	0	0	0	0	0	0	0	0	0	0
-1.9394	0	0	0	0	0	0	0	0	0	0	0	0
-1.939	0	0	0	0	0	0	0	0	0	0	0	0
-1.9386	0	0	0	0	0	0	0	0	0	0	0	0
-1.9382	0	0	0	0	0	0	0	0	0	0	0	0
-1.9378	0	0	0	0	0	0	0	0	0	0	0	0
-1.9374	0	0	0	0	0	0	0	0	0	0	0	0
-1.937	0	0	0	0	0	0	0	0	0	0	0	0
-1.9366	0	0	0	0	0	0	0	0	0	0	0	0
-1.9362	0	0	0	0	0	0	0	0	0	0	0	0
-1.9358	0	0	0	0	0	0	0	0	0	0	0	0
-1.9354	0	0	0	0	0	0	0	0	0	0	0	0
-1.935	0	0	0	0	0	0	0	0	0	0	0	0
-1.9346	0	0	0	0	0	0	0	0	0	0	0	0
-1.9342	0	0	0	0	0	0	0	0	0	0	0	0
-1.9338	0	0	0	0	0	0	0	0	0	0	0	0
-1.9334	0	0	0	0	0	0	0	0	0	0	0	0
-1.933	0	0	0	0	0	0	0	0	0	0	0	0
-1.9326	0	0	0	0	0	0	0	0	0	0	0	0
-1.9322	0	0	0	0	0	0	0	0	0	0	0	0
-1.9318	0	0	0	0	0	0	0	0	0	0	0	0
-1.9314	0	0	0	0	0	0	0	0	0	0	0	0
-1.931	0	0	0	0	0	0	0	0	0	0	0	0
-1.9306	0	0	0	0	0	0	0	0	0	0	0	0
-1.9302	0	0	0	0	0	0	0	0	0	0	0	0
-1.9298	0	0	0	0	0	0	0	0	0	0	0	0
-1.9294	0	0	0	0	0	0	0	0	0	0	0	0
-1.929	0	0	0	0	0	0	0	0	0	0	0	0
-1.9286	0	0	0	0	0	0	0	0	0	0	0	0
-1.9282	0	0	0	0	0	0	0	0	0	0	0	0
-1.9278	0	0	0	0	0	0	0	0	0	0	0	0
-1.9274	0	0	0	0	0	0	0	0	0	0	0	0
-1.927	0	0	0	0	0	0	0	0	0	0	0	0
-1.9266	0	0	0	0	0	0	0	0	0	0	0	0
-1.9262	0	0	0	0	0	0	0	0	0	0	0	0
-1.9258	0	0	0	0	0	0	0	0	0	0	0	0
-1.9254	0	0	0	0	0	0	0	0	0	0	0	0
-1.925	0	0	0	0	0	0	0	0	0	0	0	0
-1.9246	0	0	0	0	0	0	0	0	0	0	0	0
-1.9242	0	0	0	0	0	0	0	0	0	0	0	0
-1.9238	0	0	0	0	0	0	0	0	0	0	0	0
-1.9234	0	0	0	0	0	0	0	0	0	0	0	0
-1.923	0	0	0	0	0	0	0	0	0	0	0	0
-1.9226	0	0	0	0	0	0	0	0	0	0	0	0
-1.9222	0	0	0	0	0	0	0	0	0	0	0	0
-1.9218	0	0	0	0	0	0	0	0	0	0	0	0
-1.9214	0	0	0	0	0	0	0	0	0	0	0	0
-1.921	0	0	0	0	0	0	0	0	0	0	0	0
-1.9206	0	0	0	0	0	0	0	0	0	0	0	0
-1.9202	0	0	0	0	0	0	0	0	0	0	0	0
-1.9198	0	0	0	0	0	0	0	0	0	0	0	0
-1.9194	0	0	0	0	0	0	0	0	0	0	0	0
-1.9191	0	0	0	0	0	0	0	0	0	0	0	0
-1.9187	0	0	0	0	0	0	0	0	0	0	0	0
-1.9183	0	0	0	0	0	0	0	0	0	0	0	0
-1.9179	0	0	0	0	0	0	0	0	0	0	0	0
-1.9175	0	0	0	0	0	0	0	0	0	0	0	0
-1.9171	0	0	0	0	0	0	0	0	0	0	0	0
-1.9167	0	0	0	0	0	0	0	0	0	0	0	0
-1.9163	0	0	0	0	0	0	0	0	0	0	0	0
-1.9159	0	0	0	0	0	0	0	0	0	0	0	0
-1.9155	0	0	0	0	0	0	0	0	0	0	0	0
-1.9151	0	0	0	0	0	0	0	0	0	0	0	0
-1.9147	0	0	0	0	0	0	0	0	0	0	0	0
-1.9143	0	0	0	0	0	0	0	0	0	0	0	0
-1.9139	0	0	0	0	0	0	0	0	0	0	0	0
-1.9135	0	0	0	0	0	0	0	0	0	0	0	0
-1.9131	0	0	0	0	0	0	0	0	0	0	0	0
-1.9127	0	0	0	0	0	0	0	0	0	0	0	0
-1.9123	0	0	0	0	0	0	0	0	0	0	0	0
-1.9119	0	0	0	0	0	0	0	0	0	0	0	0
-1.9115	0	0	0	0	0	0	0	0	0	0	0	0
-1.9111	0	0	0	0	0	0	0	0	0	0	0	0
-1.9107	0	0	0	0	0	0	0	0	0	0	0	0
-1.9103	0	0	0	0	0	0	0	0	0	0	0	0
-1.9099	0	0	0	0	0	0	0	0	0	0	0	0
-1.9095	0	0	0	0	0	0	0	0	0	0	0	0
-1.9091	0	0	0	0	0	0	0	0	0	0	0	0
-1.9087	0	0	0	0	0	0	0	0	0	0	0	0
-1.9083	0	0	0	0	0	0	0	0	0	0	0	0
-1.9079	0	0	0	0	0	0	0	0	0	0	0	0
-1.9075	0	0	0	0	0	0	0	0	0	0	0	0
-1.9071	0	0	0	0	0	0	0	0	0	0	0	0
-1.9067	0	0	0	0	0	0	0	0	0	0	0	0
-1.9063	0	0	0	0	0	0	0	0	0	0	0	0
-1.9059	0	0	0	0	0	0	0	0	0	0	0	0
-1.9055	0	0	0	0	0	0	0	0	0	0	0	0
-1.9051	0	0	0	0	0	0	0	0	0	0	0	0
-1.9047	0	0	0	0	0	0	0	0	0	0	0	0
-1.9043	0	0	0	0	0	0	0	0	0	0	0	0
-1.9039	0	0	0	0	0	0	0	0	0	0	0	0
-1.9035	0	0	0	0	0	0	0	0	0	0	0	0
-1.9031	0	0	0	0	0	0	0	0	0	0	0	0
-1.9027	0	0	0	0	0	0	0	0	0	0	0	0
-1.9023	0	0	0	0	0	0	0	0	0	0	0	0
-1.9019	0	0	0	0	0	0	0	0	0	0	0	0
-1.9015	0	0	0	0	0	0	0	0	0	0	0	0
-1.9011	0	0	0	0	0	0	0	0	0	0	0	0
-1.9007	0	0	0	0	0	0	0	0	0	0	0	0
-1.9003	0	0	0	0	0	0	0	0	0	0	0	0
-1.8999	0	0	0	0	0	0	0	0	0	0	0	0
-1.8995	0	0	0	0	0	0	0	0	0	0	0	0
-1.8991	0	0	0	0	0	0	0	0	0	0	0	0
-1.8987	0	0	0	0	0	0	0	0	0	0	0	0
-1.8983	0	0	0	0	0	0	0	0	0	0	0	0
-1.8979	0	0	0	0	0	0	0	0	0	0	0	0
-1.8975	0	0	0	0	0	0	0	0	0	0	0	0
-1.8971	0	0	0	0	0	0	0	0	0	0	0	0
-1.8967	0	0	0	0	0	0	0	0	0	0	0	0
-1.8963	0	0	0	0	0	0	0	0	0	0	0	0
-1.8959	0	0	0	0	0	0	0	0	0	0	0	0
-1.8955	0	0	0	0	0	0	0	0	0	0	0	0
-1.8951	0	0	0	0	0	0	0	0	0	0	0	0
-1.8947	0	0	0	0	0	0	0	0	0	0	0	0
-1.8943	0	0	0	0	0	0	0	0	0	0	0	0
-1.8939	0	0	0	0	0	0	0	0	0	0	0	0
-1.8935	0	0	0	0	0	0	0	0	0	0	0	0
-1.8931	0	0	0	0	0	0	0	0	0	0	0	0
-1.8927	0	0	0	0	0	0	0	0	0	0	0	0
-1.8923	0	0	0	0	0	0	0	0	0	0	0	0
-1.8919	0	0	0	0	0	0	0	0	0	0	0	0
-1.8916	0	0	0	0	0	0	0	0	0	0	0	0
-1.8912	0	0	0	0	0	0	0	0	0	0	0	0
-1.8908	0	0	0	0	0	0	0	0	0	0	0	0
-1.8904	0	0	0	0	0	0	0	0	0	0	0	0
-1.89	0	0	0	0	0	0	0	0	0	0	0	0
-1.8896	0	0	0	0	0	0	0	0	0	0	0	0
-1.8892	0	0	0	0	0	0	0	0	0	0	0	0
-1.8888	0	0	0	0	0	0	0	0	0	0	0	0
-1.8884	0	0	0	0	0	0	0	0	0	0	0	0
-1.888	0	0	0	0	0	0	0	0	0	0	0	0
-1.8876	0	0	0	0	0	0	0	0	0	0	0	0
-1.8872	0	0	0	0	0	0	0	0	0	0	0	0
-1.8868	0	0	0	0	0	0	0	0	0	0	0	0
-1.8864	0	0	0	0	0	0	0	0	0	0	0	0
-1.886	0	0	0	0	0	0	0	0	0	0	0	0
-1.8856	0	0	0	0	0	0	0	0	0	0	0	0
-1.8852	0	0	0	0	0	0	0	0	0	0	0	0
-1.8848	0	0	0	0	0	0	0	0	0	0	0	0
-1.8844	0	0	0	0	0	0	0	0	0	0	0	0
-1.884	0	0	0	0	0	0	0	0	0	0	0	0
-1.8836	0	0	0	0	0	0	0	0	0	0	0	0
-1.8832	0	0	0	0	0	0	0	0	0	0	0	0
-1.8828	0	0	0	0	0	0	0	0	0	0	0	0
-1.8824	0	0	0	0	0	0	0	0	0	0	0	0
-1.882	0	0	0	0	0	0	0	0	0	0	0	0
-1.8816	0	0	0	0	0	0	0	0	0	0	0	0
-1.8812	0	0	0	0	0	0	0	0	0	0	0	0
-1.8808	0	0	0	0	0	0	0	0	0	0	0	0
-1.8804	0	0	0	0	0	0	0	0	0	0	0	0
-1.88	0	0	0	0	0	0	0	0	0	0	0	0
-1.8796	0	0	0	0	0	0	0	0	0	0	0	0
-1.8792	0	0	0	0	0	0	0	0	0	0	0	0
-1.8788	0	0	0	0	0	0	0	0	0	0	0	0
-1.8784	0	0	0	0	0	0	0	0	0	0	0	0
-1.878	0	0	0	0	0	0	0	0	0	0	0	0
-1.8776	0	0	0	0	0	0	0	0	0	0	0	0
-1.8772	0	0	0	0	0	0	0	0	0	0	0	0
-1.8768	0	0	0	0	0	0	0	0	0	0	0	0
-1.8764	0	0	0	0	0	0	0	0	0	0	0	0
-1.876	0	0	0	0	0	0	0	0	0	0	0	0
-1.8756	0	0	0	0	0	0	0	0	0	0	0	0
-1.8752	0	0	0	0	0	0	0	0	0	0	0	0
-1.8748	0	0	0	0	0	0	0	0	0	0	0	0
-1.8744	0	0	0	0	0	0	0	0	0	0	0	0
-1.874	0	0	0	0	0	0	0	0	0	0	0	0
-1.8736	0	0	0	0	0	0	0	0	0	0	0	0
-1.8732	0	0	0	0	0	0	0	0	0	0	0	0
-1.8728	0	0	0	0	0	0	0	0	0	0	0	0
-1.8724	0	0	0	0	0	0	0	0	0	0	0	0
-1.872	0	0	0	0	0	0	0	0	0	0	0	0
-1.8716	0	0	0	0	0	0	0	0	0	0	0	0
-1.8712	0	0	0	0	0	0	0	0	0	0	0	0
-1.8708	0	0	0	0	0	0	0	0	0	0	0	0
-1.8704	0	0	0	0	0	0	0	0	0	0	0	0
-1.87	0	0	0	0	0	0	0	0	0	0	0	0
-1.8696	0	0	0	0	0	0	0	0	0	0	0	0
-1.8692	0	0	0	0	0	0	0	0	0	0	0	0
-1.8688	0	0	0	0	0	0	0	0	0	0	0	0
-1.8684	0	0	0	0	0	0	0	0	0	0	0	0
-1.868	0	0	0	0	0	0	0	0	0	0	0	0
-1.8676	0	0	0	0	0	0	0	0	0	0	0	0
-1.8672	0	0	0	0	0	0	0	0	0	0	0	0
-1.8668	0	0	0	0	0	0	0	0	0	0	0	0
-1.8664	0	0	0	0	0	0	0	0	0	0	0	0
-1.866	0	0	0	0	0	0	0	0	0	0	0	0
-1.8656	0	0	0	0	0	0	0	0	0	0	0	0
-1.8652	0	0	0	0	0	0	0	0	0	0	0	0
-1.8648	0	0	0	0	0	0	0	0	0	0	0	0
-1.8645	0	0	0	0	0	0	0	0	0	0	0	0
-1.8641	0	0	0	0	0	0	0	0	0	0	0	0
-1.8637	0	0	0	0	0	0	0	0	0	0	0	0
-1.8633	0	0	0	0	0	0	0	0	0	0	0	0
-1.8629	0	0	0	0	0	0	0	0	0	0	0	0
-1.8625	0	0	0	0	0	0	0	0	0	0	0	0
-1.8621	0	0	0	0	0	0	0	0	0	0	0	0
-1.8617	0	0	0	0	0	0	0	0	0	0	0	0
-1.8613	0	0	0	0	0	0	0	0	0	0	0	0
-1.8609	0	0	0	0	0	0	0	0	0	0	0	0
-1.8605	0	0	0	0	0	0	0	0	0	0	0	0
-1.8601	0	0	0	0	0	0	0	0	0	0	0	0
-1.8597	0	0	0	0	0	0	0	0	0	0	0	0
-1.8593	0	0	0	0	0	0	0	0	0	0	0	0
-1.8589	0	0	0	0	0	0	0	0	0	0	0	0
-1.8585	0	0	0	0	0	0	0	0	0	0	0	0
-1.8581	0	0	0	0	0	0	0	0	0	0	0	0
-1.8577	0	0	0	0	0	0	0	0	0	0	0	0
-1.8573	0	0	0	0	0	0	0	0	0	0	0	0
-1.8569	0	0	0	0	0	0	0	0	0	0	0	0
-1.8565	0	0	0	0	0	0	0	0	0	0	0	0
-1.8561	0	0	0	0	0	0	0	0	0	0	0	0
-1.8557	0	0	0	0	0	0	0	0	0	0	0	0
-1.8553	0	0	0	0	0	0	0	0	0	0	0	0
-1.8549	0	0	0	0	0	0	0	0	0	0	0	0
-1.8545	0	0	0	0	0	0	0	0	0	0	0	0
-1.8541	0	0	0	0	0	0	0	0	0	0	0	0
-1.8537	0	0	0	0	0	0	0	0	0	0	0	0
-1.8533	0	0	0	0	0	0	0	0	0	0	0	0
-1.8529	0	0	0	0	0	0	0	0	0	0	0	0
-1.8525	0	0	0	0	0	0	0	0	0	0	0	0
-1.8521	0.0014207	0.0028414	0	0	0	0	0	0	0	0	0	0
-1.8517	0.0015378	0.0030756	0	0	0	0	0	0	0	0	0	0
-1.8513	0.0016639	0.0033278	0	0	0	0	0	0	0	0	0	0
-1.8509	0.0017996	0.0035993	0	0	0	0	0	0	0	0	0	0
-1.8505	0.0019457	0.0038913	0	0	0	0	0	0	0	0	0	0
-1.8501	0.0021027	0.0042054	0	0	0	0	0	0	0	0	0	0
-1.8497	0.0022715	0.0045431	0	0	0	0	0	0	0	0	0	0
-1.8493	0.0024529	0.0049059	0	0	0	0	0	0	0	0	0	0
-1.8489	0.0026478	0.0052955	0	0	0	0	0	0	0	0	0	0
-1.8485	0.0028569	0.0057139	0	0	0	0	0	0	0	0	0	0
-1.8481	0.0030814	0.0061629	0	0	0	0	0	0	0	0	0	0
-1.8477	0.0033222	0.0066444	0	0	0	0	0	0	0	0	0	0
-1.8473	0.0035804	0.0071608	0	0	0	0	0	0	0	0	0	0
-1.8469	0.0038571	0.0077143	0	0	0	0	0	0	0	0	0	0
-1.8465	0.0041536	0.0083072	0	0	0	0	0	0	0	0	0	0
-1.8461	0.0044711	0.0089422	0	0	0	0	0	0	0	0	0	0
-1.8457	0.0048109	0.0096218	0	0	0	0	0	0	0	0	0	0
-1.8453	0.0051745	0.010349	0	0	0	0	0	0	0	0	0	0
-1.8449	0.0055634	0.011127	0	0	0	0	0	0	0	0	0	0
-1.8445	0.0059791	0.011958	0	0	0	0	0	0	0	0	0	0
-1.8441	0.0064234	0.012847	0	0	0	0	0	0	0	0	0	0
-1.8437	0.0068979	0.013796	0	0	0	0	0	0	0	0	0	0
-1.8433	0.0074045	0.014809	0	0	0	0	0	0	0	0	0	0
-1.8429	0.0079452	0.01589	0	0	0	0	0	0	0	0	0	0
-1.8425	0.0085219	0.017044	0	0	0	0	0	0	0	0	0	0
-1.8421	0.0091369	0.018274	0	0	0	0	0	0	0	0	0	0
-1.8417	0.0097924	0.019585	0	0	0	0	0	0	0	0	0	0
-1.8413	0.010491	0.020982	0	0	0	0	0	0	0	0	0	0
-1.8409	0.011234	0.022469	0	0	0	0	0	0	0	0	0	0
-1.8405	0.012026	0.024052	0	0	0	0	0	0	0	0	0	0
-1.8401	0.012868	0.025737	0	0	0	0	0	0	0	0	0	0
-1.8397	0.013764	0.027529	0	0	0	0	0	0	0	0	0	0
-1.8393	0.014717	0.029433	0	0	0	0	0	0	0	0	0	0
-1.8389	0.015729	0.031457	0	0	0	0	0	0	0	0	0	0
-1.8385	0.016804	0.033607	0	0	0	0	0	0	0	0	0	0
-1.8381	0.017945	0.03589	0	0	0	0	0	0	0	0	0	0
-1.8377	0.019156	0.038312	0	0	0	0	0	0	0	0	0	0
-1.8373	0.020441	0.040882	0	0	0	0	0	0	0	0	0	0
-1.837	0.021803	0.043607	0	0	0	0	0	0	0	0	0	0
-1.8366	0.023247	0.046494	0	0	0	0	0	0	0	0	0	0
-1.8362	0.024777	0.049554	0	0	0	0	0	0	0	0	0	0
-1.8358	0.026397	0.052793	0	0	0	0	0	0	0	0	0	0
-1.8354	0.028111	0.056222	0	0	0	0	0	0	0	0	0	0
-1.835	0.029925	0.059851	0	0	0	0	0	0	0	0	0	0
-1.8346	0.031844	0.063687	0	0	0	0	0	0	0	0	0	0
-1.8342	0.033872	0.067744	0	0	0	0	0	0	0	0	0	0
-1.8338	0.036015	0.072029	0	0	0	0	0	0	0	0	0	0
-1.8334	0.038278	0.076556	0	0	0	0	0	0	0	0	0	0
-1.833	0.040667	0.081334	0	0	0	0	0	0	0	0	0	0
-1.8326	0.043188	0.086377	0	0	0	0	0	0	0	0	0	0
-1.8322	0.045848	0.091696	0	0	0	0	0	0	0	0	0	0
-1.8318	0.048652	0.097303	0	0	0	0	0	0	0	0	0	0
-1.8314	0.051606	0.10321	0	0	0	0	0	0	0	0	0	0
-1.831	0.054719	0.10944	0	0	0	0	0	0	0	0	0	0
-1.8306	0.057996	0.11599	0	0	0	0	0	0	0	0	0	0
-1.8302	0.061445	0.12289	0	0	0	0	0	0	0	0	0	0
-1.8298	0.065074	0.13015	0	0	0	0	0	0	0	0	0	0
-1.8294	0.068889	0.13778	0	0	0	0	0	0	0	0	0	0
-1.829	0.072899	0.1458	0	0	0	0	0	0	0	0	0	0
-1.8286	0.077112	0.15422	0	0	0	0	0	0	0	0	0	0
-1.8282	0.081535	0.16307	0	0	0	0	0	0	0	0	0	0
-1.8278	0.086179	0.17236	0	0	0	0	0	0	0	0	0	0
-1.8274	0.09105	0.1821	0	0	0	0	0	0	0	0	0	0
-1.827	0.096159	0.19232	0	0	0	0	0	0	0	0	0	0
-1.8266	0.10151	0.20303	0	0	0	0	0	0	0	0	0	0
-1.8262	0.10713	0.21425	0	0	0	0	0	0	0	0	0	0
-1.8258	0.113	0.226	0	0	0	0	0	0	0	0	0	0
-1.8254	0.11915	0.23831	0	0	0	0	0	0	0	0	0	0
-1.825	0.12559	0.25118	0	0	0	0	0	0	0	0	0	0
-1.8246	0.13232	0.26464	0	0	0	0	0	0	0	0	0	0
-1.8242	0.13936	0.27871	0	0	0	0	0	0	0	0	0	0
-1.8238	0.14671	0.29342	0	0	0	0	0	0	0	0	0	0
-1.8234	0.15439	0.30878	0	0	0	0	0	0	0	0	0	0
-1.823	0.16241	0.32481	0	0	0	0	0	0	0	0	0	0
-1.8226	0.17077	0.34154	0	0	0	0	0	0	0	0	0	0
-1.8222	0.17949	0.35899	0	0	0	0	0	0	0	0	0	0
-1.8218	0.18859	0.37718	0	0	0	0	0	0	0	0	0	0
-1.8214	0.19807	0.39614	0	0	0	0	0	0	0	0	0	0
-1.821	0.20794	0.41588	0	0	0	0	0	0	0	0	0	0
-1.8206	0.21822	0.43643	0	0	0	0	0	0	0	0	0	0
-1.8202	0.22891	0.45782	0	0	0	0	0	0	0	0	0	0
-1.8198	0.24142	0.47938	0	0	0	0	0	0	0	0	0	0
-1.8194	0.2531	0.50244	0	0	0	0	0	0	0	0	0	0
-1.819	0.26524	0.52641	0	0	0	0	0	0	0	0	0	0
-1.8186	0.27785	0.55131	0	0	0	0	0	0	0	0	0	0
-1.8182	0.29232	0.57988	0	0	0	0	0	0	0	0	0	0
-1.8178	0.30603	0.60691	0	0	0	0	0	0	0	0	0	0
-1.8174	0.32026	0.63496	0	0	0	0	0	0	0	0	0	0
-1.817	0.33502	0.66404	0	0	0	0	0	0	0	0	0	0
-1.8166	0.35033	0.69418	0	0	0	0	0	0	0	0	0	0
-1.8162	0.3662	0.72541	0	0	0	0	0	0	0	0	0	0
-1.8158	0.38264	0.75774	0	0	0	0	0	0	0	0	0	0
-1.8154	0.39966	0.7912	0	0	0	0	0	0	0	0	0	0
-1.815	0.41729	0.82582	0	0	0	0	0	0	0	0	0	0
-1.8146	0.43552	0.86161	0	0	0	0	0	0	0	0	0	0
-1.8142	0.45438	0.8986	0	0	0	0	0	0	0	0	0	0
-1.8138	0.47387	0.93681	0	0	0	0	0	0	0	0	0	0
-1.8134	0.49402	0.97627	0	0	0	0	0	0	0	0	0	0
-1.813	0.51482	1.017	0	0	0	0	0	0	0	0	0	0
-1.8126	0.5363	1.059	0	0	0	0	0	0	0	0	0	0
-1.8122	0.55846	1.1023	0	0	0	0	0	0	0	0	0	0
-1.8118	0.58132	1.1469	0	0	0	0	0	0	0	0	0	0
-1.8114	0.60488	1.1929	0	0	0	0	0	0	0	0	0	0
-1.811	0.62916	1.2402	0	0	0	0	0	0	0	0	0	0
-1.8106	0.65418	1.2889	0	0	0	0	0	0	0	0	0	0
-1.8102	0.67993	1.339	0	0	0	0	0	0	0	0	0	0
-1.8098	0.70643	1.3905	0	0	0	0	0	0	0	0	0	0
-1.8095	0.73369	1.4434	0	0	0	0	0	0	0	0	0	0
-1.8091	0.76172	1.4978	0	0	0	0	0	0	0	0	0	0
-1.8087	0.79052	1.5536	0	0	0	0	0	0	0	0	0	0
-1.8083	0.82011	1.6108	0	0	0	0	0	0	0	0	0	0
-1.8079	0.85049	1.6695	0	0	0	0	0	0	0	0	0	0
-1.8075	0.88168	1.7297	0	0	0	0	0	0	0	0	0	0
-1.8071	0.91366	1.7914	0	0	0	0	0	0	0	0	0	0
-1.8067	0.94646	1.8545	0	0	0	0	0	0	0	0	0	0
-1.8063	0.98008	1.9191	0	0	0	0	0	0	0	0	0	0
-1.8059	1.0145	1.9852	0	0	0	0	0	0	0	0	0	0
-1.8055	1.0498	2.0528	0	0	0	0	0	0	0	0	0	0
-1.8051	1.0859	2.1219	0	0	0	0	0	0	0	0	0	0
-1.8047	1.1228	2.1924	0	0	0	0	0	0	0	0	0	0
-1.8043	1.1606	2.2644	0	0	0	0	0	0	0	0	0	0
-1.8039	1.1992	2.3379	0	0	0	0	0	0	0	0	0	0
-1.8035	1.2386	2.4129	0	0	0	0	0	0	0	0	0	0
-1.8031	1.2789	2.4893	0	0	0	0	0	0	0	0	0	0
-1.8027	1.3201	2.5671	0	0	0	0	0	0	0	0	0	0
-1.8023	1.362	2.6463	0	0	0	0	0	0	0	0	0	0
-1.8019	1.4048	2.727	0	0	0	0	0	0	0	0	0	0
-1.8015	1.4484	2.8091	0	0	0	0	0	0	0	0	0	0
-1.8011	1.4929	2.8925	0	0	0	0	0	0	0	0	0	0
-1.8007	1.5382	2.9772	0	0	0	0	0	0	0	0	0	0
-1.8003	1.5843	3.0633	0	0	0	0	0	0	0	0	0	0
-1.7999	1.6312	3.1507	0	0	0	0	0	0	0	0	0	0
-1.7995	1.6789	3.2394	0	0	0	0	0	0	0	0	0	0
-1.7991	1.7275	3.3293	0	0	0	0	0	0	0	0	0	0
-1.7987	1.7768	3.4204	0	0	0	0	0	0	0	0	0	0
-1.7983	1.8269	3.5126	0	0	0	0	0	0	0	0	0	0
-1.7979	1.8778	3.606	0	0	0	0	0	0	0	0	0	0
-1.7975	1.9294	3.7005	0	0	0	0	0	0	0	0	0	0
-1.7971	1.9818	3.7961	0	0	0	0	0	0	0	0	0	0
-1.7967	2.035	3.8927	0	0	0	0	0	0	0	0	0	0
-1.7963	2.0888	3.9903	0	0	0	0	0	0	0	0	0	0
-1.7959	2.1434	4.0888	0	0	0	0	0	0	0	0	0	0
-1.7955	2.1987	4.1882	0	0	0	0	0	0	0	0	0	0
-1.7951	2.2547	4.2884	0	0	0	0	0	0	0	0	0	0
-1.7947	2.3113	4.3894	0	0	0	0	0	0	0	0	0	0
-1.7943	2.3687	4.4911	0	0	0	0	0	0	0	0	0	0
-1.7939	2.4266	4.5935	0	0	0	0	0	0	0	0	0	0
-1.7935	2.4866	4.6958	0	0	0	0	0	0	0	0	0	0
-1.7931	2.5459	4.7994	0	0	0	0	0	0	0	0	0	0
-1.7927	2.6058	4.9035	0	0	0	0	0	0	0	0	0	0
-1.7923	2.6663	5.008	0	0	0	0	0	0	0	0	0	0
-1.7919	2.7273	5.1129	0	0	0	0	0	0	0	0	0	0
-1.7915	2.7889	5.2181	0	0	0	0	0	0	0	0	0	0
-1.7911	2.8511	5.3236	0	0	0	0	0	0	0	0	0	0
-1.7907	2.9137	5.4293	0	0	0	0	0	0	0	0	0	0
-1.7903	2.9769	5.5351	0	0	0	0	0	0	0	0	0	0
-1.7899	3.0405	5.6411	0	0	0	0	0	0	0	0	0	0
-1.7895	3.1045	5.747	0	0	0	0	0	0	0	0	0	0
-1.7891	3.169	5.8529	0	0	0	0	0	0	0	0	0	0
-1.7887	3.2339	5.9586	0	0	0	0	0	0	0	0	0	0
-1.7883	3.2992	6.0642	0	0	0	0	0	0	0	0	0	0
-1.7879	3.3649	6.1696	0	0	0	0	0	0	0	0	0	0
-1.7875	3.431	6.2746	0	0	0	0	0	0	0	0	0	0
-1.7871	3.4974	6.3792	0	0	0	0	0	0	0	0	0	0
-1.7867	3.5641	6.4834	0	0	0	0	0	0	0	0	0	0
-1.7863	3.6311	6.5871	0	0	0	0	0	0	0	0	0	0
-1.7859	3.6984	6.6902	0	0	0	0	0	0	0	0	0	0
-1.7855	3.7659	6.7927	0	0	0	0	0	0	0	0	0	0
-1.7851	3.8337	6.8945	0	0	0	0	0	0	0	0	0	0
-1.7847	3.9017	6.9956	0	0	0	0	0	0	0	0	0	0
-1.7843	3.97	7.0958	0	0	0	0	0	0	0	0	0	0
-1.7839	4.0384	7.1952	0	0	0	0	0	0	0	0	0	0
-1.7835	4.1071	7.2936	0	0	0	0	0	0	0	0	0	0
-1.7831	4.1772	7.3907	0	0	0	0	0	0	0	0	0	0
-1.7827	4.2463	7.487	0	0	0	0	0	0	0	0	0	0
-1.7823	4.3155	7.5823	0	0	0	0	0	0	0	0	0	0
-1.782	4.3848	7.6765	0	0	0	0	0	0	0	0	0	0
-1.7816	4.4543	7.7695	0	0	0	0	0	0	0	0	0	0
-1.7812	4.5238	7.8612	0	0	0	0	0	0	0	0	0	0
-1.7808	4.5935	7.9517	0	0	0	0	0	0	0	0	0	0
-1.7804	4.6632	8.0408	0	0	0	0	0	0	0	0	0	0
-1.78	4.733	8.1286	0	0	0	0	0	0	0	0	0	0
-1.7796	4.8029	8.215	0	0	0	0	0	0	0	0	0	0
-1.7792	4.8728	8.3	0	0	0	0	0	0	0	0	0	0
-1.7788	4.9428	8.3835	0	0	0	0	0	0	0	0	0	0
-1.7784	5.0128	8.4656	0	0	0	0	0	0	0	0	0	0
-1.778	5.0828	8.5461	0	0	0	0	0	0	0	0	0	0
-1.7776	5.1529	8.6251	0	0	0	0	0	0	0	0	0	0
-1.7772	5.223	8.7025	0	0	0	0	0	0	0	0	0	0
-1.7768	5.2932	8.7784	0	0	0	0	0	0	0	0	0	0
-1.7764	5.3633	8.8527	0	0	0	0	0	0	0	0	0	0
-1.776	5.4335	8.9254	0	0	0	0	0	0	0	0	0	0
-1.7756	5.5036	8.9965	0	0	0	0	0	0	0	0	0	0
-1.7752	5.5738	9.066	0	0	0	0	0	0	0	0	0	0
-1.7748	5.644	9.1339	0	0	0	0	0	0	0	0	0	0
-1.7744	5.7142	9.2002	0	0	0	0	0	0	0	0	0	0
-1.774	5.7844	9.2649	0	0	0	0	0	0	0	0	0	0
-1.7736	5.8547	9.328	0	0	0	0	0	0	0	0	0	0
-1.7732	5.9249	9.3895	0	0	0	0	0	0	0	0	0	0
-1.7728	5.9952	9.4494	0	0	0	0	0	0	0	0	0	0
-1.7724	6.0655	9.5078	0	0	1	0	0	0	0	0	0	0
-1.772	6.1358	9.5647	0	0	0	0	0	0	0	0	0	0
-1.7716	6.2061	9.62	0	0	0	0	0	0	0	0	0	0
-1.7712	6.2765	9.6739	0	0	0	0	0	0	0	0	0	0
-1.7708	6.3469	9.7263	0	0	0	0	0	0	0	0	0	0
-1.7704	6.4173	9.7772	0	0	0	0	0	0	0	0	0	0
-1.77	6.4878	9.8267	0	0	0	0	0	0	0	0	0	0
-1.7696	6.5583	9.8748	0	0	0	0	0	0	0	0	0	0
-1.7692	6.6288	9.9216	0	0	0	0	0	0	0	0	0	0
-1.7688	6.6994	9.9671	0	0	0	0	0	0	0	0	0	0
-1.7684	6.7701	10.011	0	0	0	0	0	0	0	0	0	0
-1.768	6.8409	10.054	0	0	0	0	0	0	0	0	0	0
-1.7676	6.9117	10.096	0	0	0	0	0	0	0	0	0	0
-1.7672	6.9825	10.137	0	0	0	0	0	0	0	0	0	0
-1.7668	7.0535	10.176	0	0	0	0	0	0	0	0	0	0
-1.7664	7.1245	10.214	0	0	0	0	0	0	0	0	0	0
-1.766	7.1956	10.252	0	0	0	0	0	0	0	0	0	0
-1.7656	7.2668	10.288	0	0	0	0	0	0	0	0	0	0
-1.7652	7.338	10.323	0	0	0	0	0	0	0	0	0	0
-1.7648	7.4094	10.358	0	0	0	0	0	0	0	0	0	0
-1.7644	7.4808	10.391	0	0	0	0	0	0	0	0	0	0
-1.764	7.5523	10.424	0	0	0	0	0	0	0	0	0	0
-1.7636	7.6239	10.455	0	0	0	0	0	0	0	0	0	0
-1.7632	7.6956	10.486	0	0	0	0	0	0	0	0	0	0
-1.7628	7.7673	10.517	0	0	0	0	0	0	0	0	0	0
-1.7624	7.8391	10.546	0	0	0	0	0	0	0	0	0	0
-1.762	7.911	10.575	0	0	0	0	0	0	0	0	0	0
-1.7616	7.983	10.603	0	0	0	0	0	0	0	0	0	0
-1.7612	8.055	10.63	0	0	0	0	0	0	0	0	0	0
-1.7608	8.1271	10.657	0	0	0	0	0	0	0	0	0	0
-1.7604	8.1992	10.684	0	0	0	0	0	0	0	0	0	0
-1.76	8.2713	10.709	0	0	0	0	0	0	0	0	0	0
-1.7596	8.3435	10.734	0	0	0	0	0	0	0	0	0	0
-1.7592	8.4157	10.759	0	0	0	0	0	0	0	0	0	0
-1.7588	8.4879	10.783	0	0	0	0	0	0	0	0	0	0
-1.7584	8.56	10.806	0	0	0	0	0	0	0	0	0	0
-1.758	8.6322	10.829	0	0	0	0	0	0	0	0	0	0
-1.7576	8.7043	10.852	0	0	0	0	0	0	0	0	0	0
-1.7572	8.7763	10.873	0	0	0	0	0	0	0	0	0	0
-1.7568	8.8483	10.895	0	0	0	0	0	0	0	0	0	0
-1.7564	8.9201	10.915	0	0	0	0	0	0	0	0	0	0
-1.756	8.9919	10.936	0	0	0	0	0	0	0	0	0	0
-1.7556	9.0635	10.955	0	0	0	0	0	0	0	0	0	0
-1.7552	9.1349	10.974	0	0	0	0	0	0	0	0	0	0
-1.7549	9.2062	10.993	0	0	0	0	0	0	0	0	0	0
-1.7545	9.2773	11.011	0	0	0	0	0	0	0	0	0	0
-1.7541	9.3481	11.028	0	0	0	0	0	0	0	0	0	0
-1.7537	9.4187	11.045	0	0	0	0	0	0	0	0	0	0
-1.7533	9.489	11.06	0	0	0	0	0	0	0	0	0	0
-1.7529	9.559	11.076	0	0	0	0	0	0	0	0	0	0
-1.7525	9.6286	11.09	0	0	0	0	0	0	0	0	0	0
-1.7521	9.6979	11.104	0	0	0	0	0	0	0	0	0	0
-1.7517	9.7668	11.117	0	0	0	0	0	0	0	0	0	0
-1.7513	9.8353	11.129	0	0	0	0	0	0	0	0	0	0
-1.7509	9.9033	11.14	0	0	0	0	0	0	0	0	0	0
-1.7505	9.9708	11.151	0	0	0	0	0	0	0	0	0	0
-1.7501	10.038	11.161	0	0	0	0	0	0	0	0	0	0
-1.7497	10.104	11.169	0	0	0	0	0	0	0	0	0	0
-1.7493	10.17	11.177	0	0	0	0	0	0	0	0	0	0
-1.7489	10.235	11.184	0	0	0	0	0	0	0	0	0	0
-1.7485	10.3	11.19	0	0	0	0	0	0	0	0	0	0
-1.7481	10.364	11.194	0	0	0	0	0	0	0	0	0	0
-1.7477	10.427	11.198	0	0	0	0	0	0	0	0	0	0
-1.7473	10.49	11.201	0	0	0	0	0	0	0	0	0	0
-1.7469	10.552	11.202	0	0	0	0	0	0	0	0	0	0
-1.7465	10.613	11.203	0	0	0	0	0	0	0	0	0	0
-1.7461	10.673	11.202	0	0	0	0	0	0	0	0	0	0
-1.7457	10.732	11.2	0	0	0	0	0	0	0	0	0	0
-1.7453	10.79	11.197	0	0	0	0	0	0	0	0	0	0
-1.7449	10.848	11.193	0	0	0	0	0	0	0	0	0	0
-1.7445	10.904	11.188	0	0	0	0	0	0	0	0	0	0
-1.7441	10.96	11.182	0	0	0	0	0	0	0	0	0	0
-1.7437	11.014	11.175	0	0	0	0	0	0	0	0	0	0
-1.7433	11.068	11.166	0	0	0	0	0	0	0	0	0	0
-1.7429	11.12	11.157	0	0	0	0	0	0	0	0	0	0
-1.7425	11.171	11.146	0	0	0	0	0	0	0	0	0	0
-1.7421	11.221	11.134	0	0	0	0	0	0	0	0	0	0
-1.7417	11.27	11.122	0	0	0	0	0	0	0	0	0	0
-1.7413	11.318	11.108	0	0	0	0	0	0	0	0	0	0
-1.7409	11.365	11.093	0	0	0	0	0	0	0	0	0	0
-1.7405	11.41	11.077	0	0	0	0	0	0	0	0	0	0
-1.7401	11.454	11.061	0	0	0	0	0	0	0	0	0	0
-1.7397	11.497	11.044	0	0	0	0	0	1	0	0	0	0
-1.7393	11.538	11.025	0	0	0	0	0	0	0	0	0	0
-1.7389	11.579	11.006	0	0	0	0	0	0	0	0	0	0
-1.7385	11.618	10.987	0	0	0	0	0	0	0	0	0	0
-1.7381	11.655	10.967	0	0	1	0	0	0	0	0	0	0
-1.7377	11.691	10.946	0	0	0	0	0	0	0	0	0	0
-1.7373	11.726	10.924	0	0	0	0	0	0	0	0	0	0
-1.7369	11.76	10.903	0	0	0	0	0	0	0	0	0	0
-1.7365	11.792	10.881	0	0	0	0	0	0	0	0	0	0
-1.7361	11.822	10.858	0	0	0	0	0	0	0	0	0	0
-1.7357	11.851	10.835	0	0	0	0	0	0	0	0	0	0
-1.7353	11.879	10.813	0	0	0	0	0	0	0	0	0	0
-1.7349	11.905	10.79	0	0	0	0	0	0	0	0	0	0
-1.7345	11.93	10.767	0	0	0	0	0	0	0	0	0	0
-1.7341	11.953	10.744	0	0	0	0	0	0	0	0	0	0
-1.7337	11.975	10.722	0	0	0	0	0	0	0	0	0	0
-1.7333	11.995	10.699	0	0	0	0	0	0	0	0	0	0
-1.7329	12.014	10.677	0	0	0	0	0	0	0	0	0	0
-1.7325	12.031	10.656	0	0	0	0	0	0	0	0	0	0
-1.7321	12.047	10.634	0	0	0	0	0	0	0	0	0	0
-1.7317	12.061	10.614	0	0	0	0	0	0	0	0	0	0
-1.7313	12.074	10.594	0	0	0	0	0	0	0	0	0	0
-1.7309	12.085	10.574	0	0	0	0	0	0	0	0	0	0
-1.7305	12.095	10.556	0	0	0	0	0	0	0	0	0	0
-1.7301	12.103	10.538	0	0	0	0	0	0	0	0	0	0
-1.7297	12.11	10.521	0	0	0	0	0	0	0	0	0	0
-1.7293	12.115	10.505	0	0	0	0	0	0	0	0	0	0
-1.7289	12.118	10.489	0	0	0	0	0	0	0	0	0	0
-1.7285	12.12	10.475	0	0	0	0	0	0	0	0	0	0
-1.7281	12.121	10.462	0	0	0	0	0	0	0	0	0	0
-1.7277	12.119	10.45	0	0	0	0	0	0	0	0	0	0
-1.7274	12.117	10.439	0	0	0	0	0	0	0	0	0	0
-1.727	12.113	10.429	0	0	0	0	0	0	0	0	0	0
-1.7266	12.107	10.42	0	0	0	0	0	0	0	0	0	0
-1.7262	12.099	10.412	0	0	0	0	0	0	0	0	0	0
-1.7258	12.09	10.405	0	0	0	0	0	0	0	0	0	0
-1.7254	12.08	10.399	0	0	0	0	0	0	0	0	0	0
-1.725	12.068	10.394	0	0	0	0	0	0	0	0	0	0
-1.7246	12.054	10.39	0	0	0	0	0	0	0	0	0	0
-1.7242	12.039	10.388	0	0	0	0	0	0	0	0	0	0
-1.7238	12.023	10.386	0	0	0	0	0	0	0	0	0	0
-1.7234	12.004	10.385	0	0	0	0	0	0	0	0	0	0
-1.723	11.985	10.385	0	0	0	0	0	0	0	0	0	0
-1.7226	11.963	10.385	0	0	0	0	0	0	0	0	0	0
-1.7222	11.94	10.387	0	0	0	0	0	0	0	0	0	0
-1.7218	11.916	10.389	0	0	0	0	0	0	0	0	0	0
-1.7214	11.89	10.391	0	0	0	0	0	0	0	0	0	0
-1.721	11.862	10.394	0	0	0	0	0	0	0	0	0	0
-1.7206	11.833	10.398	0	0	0	0	0	0	0	0	0	0
-1.7202	11.802	10.402	0	0	0	0	0	0	0	0	0	0
-1.7198	11.77	10.406	0	0	0	0	0	0	0	0	0	0
-1.7194	11.736	10.41	0	0	0	0	0	0	0	0	0	0
-1.719	11.701	10.415	0	0	0	0	0	0	0	0	0	0
-1.7186	11.664	10.419	0	0	0	0	0	0	0	0	0	0
-1.7182	11.625	10.423	0	0	0	0	0	0	0	0	0	0
-1.7178	11.585	10.428	0	0	0	0	0	0	0	0	0	0
-1.7174	11.543	10.431	0	0	0	0	0	0	0	0	0	0
-1.717	11.5	10.435	0	0	0	0	0	0	0	0	0	0
-1.7166	11.455	10.437	0	0	0	0	0	0	0	0	0	0
-1.7162	11.408	10.439	0	0	0	0	0	0	0	0	0	0
-1.7158	11.36	10.441	0	0	0	0	0	0	0	0	0	0
-1.7154	11.311	10.442	0	0	0	0	0	0	0	0	0	0
-1.715	11.26	10.441	0	0	0	0	0	0	0	0	0	0
-1.7146	11.207	10.44	0	0	0	0	0	0	0	0	0	0
-1.7142	11.152	10.438	0	0	0	0	0	0	0	0	0	0
-1.7138	11.097	10.434	0	0	0	0	0	0	0	0	0	0
-1.7134	11.039	10.429	0	0	0	0	0	0	1	0	0	0
-1.713	10.98	10.423	0	0	0	0	0	0	0	0	0	0
-1.7126	10.919	10.415	0	0	0	0	0	0	0	0	0	0
-1.7122	10.857	10.406	0	0	0	0	0	0	0	0	0	0
-1.7118	10.794	10.395	0	0	0	0	0	0	0	0	0	0
-1.7114	10.728	10.383	0	0	0	0	0	0	0	0	0	0
-1.711	10.662	10.369	0	0	0	0	0	0	0	0	0	0
-1.7106	10.593	10.353	0	0	0	0	0	0	0	0	0	0
-1.7102	10.523	10.335	0	0	0	0	0	0	0	0	0	0
-1.7098	10.452	10.315	0	0	0	0	0	0	0	0	0	0
-1.7094	10.379	10.293	0	0	0	0	0	0	0	0	0	0
-1.709	10.305	10.269	0	0	0	0	0	0	0	0	0	0
-1.7086	10.229	10.244	0	0	0	0	0	0	0	0	0	0
-1.7082	10.152	10.216	0	0	0	0	0	0	0	0	0	0
-1.7078	10.073	10.185	0	0	0	0	0	0	0	0	0	0
-1.7074	9.9932	10.153	0	0	0	0	0	0	0	0	0	0
-1.707	9.9117	10.118	0	0	0	0	0	0	0	0	0	0
-1.7066	9.8287	10.082	0	0	0	0	0	0	0	0	0	0
-1.7062	9.7445	10.043	0	0	0	0	0	0	0	0	0	0
-1.7058	9.6589	10.001	0	0	0	0	0	0	0	0	0	0
-1.7054	9.5719	9.9576	0	0	0	0	0	0	0	0	0	0
-1.705	9.4837	9.9116	0	0	0	0	0	0	0	0	0	0
-1.7046	9.3941	9.8634	0	0	0	0	0	0	0	0	0	0
-1.7042	9.3034	9.8128	0	0	0	0	0	0	0	0	0	0
-1.7038	9.2114	9.76	0	0	0	0	0	0	0	0	0	0
-1.7034	9.1182	9.7048	0	0	0	0	0	0	0	0	0	0
-1.703	9.0239	9.6474	0	0	0	0	0	1	0	0	0	0
-1.7026	8.9285	9.5877	0	0	0	0	0	0	0	0	0	0
-1.7022	8.8319	9.5258	0	0	0	0	0	0	0	0	0	0
-1.7018	8.7343	9.4617	0	0	0	0	0	0	0	0	0	0
-1.7014	8.6357	9.3953	0	0	0	0	0	0	0	0	0	0
-1.701	8.5361	9.3268	0	0	0	0	0	0	0	0	0	0
-1.7006	8.4356	9.2561	0	0	0	0	0	0	0	0	0	0
-1.7002	8.3341	9.1833	0	0	0	0	0	0	0	0	0	0
-1.6999	8.2318	9.1085	0	0	0	0	0	0	0	0	0	0
-1.6995	8.1287	9.0316	0	0	0	0	0	0	0	0	0	0
-1.6991	8.0248	8.9528	0	0	0	0	0	0	0	0	0	0
-1.6987	7.9202	8.872	0	0	0	0	0	0	0	0	0	0
-1.6983	7.8148	8.7893	0	0	0	0	0	0	0	0	0	0
-1.6979	7.7089	8.7047	0	0	0	0	0	0	0	0	0	0
-1.6975	7.6023	8.6184	0	0	0	0	0	0	0	0	0	0
-1.6971	7.4952	8.5303	0	0	0	0	0	0	0	0	0	0
-1.6967	7.3875	8.4406	0	0	0	0	0	0	0	0	0	0
-1.6963	7.2795	8.3492	0	0	0	0	0	0	0	0	0	0
-1.6959	7.171	8.2563	0	0	0	0	0	0	0	0	0	0
-1.6955	7.0622	8.1619	0	0	0	0	0	0	0	0	0	0
-1.6951	6.953	8.066	0	0	0	0	0	0	0	0	0	0
-1.6947	6.8436	7.9688	0	0	0	0	0	0	0	0	0	0
-1.6943	6.7341	7.8702	0	0	0	0	0	0	0	0	0	0
-1.6939	6.6243	7.7704	0	0	0	0	0	0	0	0	0	0
-1.6935	6.5145	7.6694	0	0	0	0	0	0	0	0	0	0
-1.6931	6.4046	7.5674	0	0	0	0	0	0	0	0	0	0
-1.6927	6.2947	7.4643	0	0	0	0	0	0	0	0	0	0
-1.6923	6.1836	7.361	0	0	0	0	0	0	0	0	0	0
-1.6919	6.074	7.256	0	0	0	0	0	0	0	0	0	0
-1.6915	5.9646	7.1502	0	0	0	0	0	0	0	0	0	0
-1.6911	5.8553	7.0436	0	0	0	0	0	0	0	0	0	0
-1.6907	5.7463	6.9363	0	0	0	0	0	0	0	0	0	0
-1.6903	5.6377	6.8284	0	0	0	0	0	0	0	0	0	0
-1.6899	5.5293	6.72	0	0	0	0	0	0	0	0	0	0
-1.6895	5.4214	6.6111	0	0	0	0	0	0	0	0	0	0
-1.6891	5.314	6.5018	0	0	0	0	0	0	0	0	0	0
-1.6887	5.207	6.3923	0	0	0	0	0	0	0	0	0	0
-1.6883	5.1006	6.2824	0	0	0	0	0	0	0	0	0	0
-1.6879	4.9948	6.1724	0	0	0	0	0	0	0	0	0	0
-1.6875	4.8897	6.0623	0	0	0	0	0	0	0	0	0	0
-1.6871	4.7852	5.9521	0	0	0	0	0	0	0	0	0	0
-1.6867	4.6815	5.842	0	0	0	0	0	0	0	0	0	0
-1.6863	4.5785	5.7319	0	0	0	0	0	0	0	0	0	0
-1.6859	4.4764	5.622	0	0	0	0	0	0	0	0	0	0
-1.6855	4.3751	5.5124	0	0	0	0	0	0	0	0	0	0
-1.6851	4.2747	5.403	0	0	0	0	0	0	0	0	0	0
-1.6847	4.1753	5.294	0	0	0	0	0	0	0	0	0	0
-1.6843	4.0769	5.1853	0	0	0	0	0	0	0	0	0	0
-1.6839	3.9794	5.0772	0	0	0	0	0	0	0	0	0	0
-1.6835	3.883	4.9696	0	0	0	0	0	0	0	0	0	0
-1.6831	3.7877	4.8626	0	0	0	0	0	0	0	0	0	0
-1.6827	3.6948	4.7553	0	0	0	0	0	0	0	0	0	0
-1.6823	3.6019	4.6496	0	0	0	0	0	0	0	0	0	0
-1.6819	3.5101	4.5446	0	0	0	0	0	0	0	0	0	0
-1.6815	3.4195	4.4404	0	0	0	0	0	0	0	0	0	0
-1.6811	3.3302	4.3371	0	0	0	0	0	0	0	0	0	0
-1.6807	3.2421	4.2347	0	0	0	0	0	0	0	0	0	0
-1.6803	3.1553	4.1332	0	0	0	0	0	0	0	0	0	0
-1.6799	3.0698	4.0327	0	0	0	0	0	0	0	0	0	0
-1.6795	2.9856	3.9332	0	0	0	0	0	0	0	0	0	0
-1.6791	2.9028	3.8348	0	0	0	0	0	0	0	0	0	0
-1.6787	2.8213	3.7375	0	0	0	0	0	0	0	0	0	0
-1.6783	2.7412	3.6413	0	0	0	0	0	0	0	0	0	0
-1.6779	2.6624	3.5464	0	0	0	0	0	0	0	0	0	0
-1.6775	2.5851	3.4526	0	0	0	0	0	0	0	0	0	0
-1.6771	2.5092	3.3601	0	0	0	0	0	0	0	0	0	0
-1.6767	2.4347	3.2689	0	0	0	0	0	0	0	0	0	0
-1.6763	2.3616	3.1789	0	0	0	0	0	0	0	0	0	0
-1.6759	2.29	3.0903	0	0	0	0	0	0	0	0	0	0
-1.6755	2.2199	3.003	0	0	0	0	0	0	0	0	0	0
-1.6751	2.1511	2.9171	0	0	0	0	0	0	0	0	0	0
-1.6747	2.0839	2.8326	0	0	0	0	0	0	0	0	0	0
-1.6743	2.0181	2.7495	0	0	0	0	0	0	0	0	0	0
-1.6739	1.9537	2.6678	0	0	0	0	0	0	0	0	0	0
-1.6735	1.8908	2.5875	0	0	0	0	0	0	0	0	0	0
-1.6731	1.8294	2.5087	0	0	0	0	0	0	0	0	0	0
-1.6727	1.7694	2.4313	0	0	0	0	0	0	0	0	0	0
-1.6724	1.7108	2.3554	0	0	0	0	0	0	0	0	0	0
-1.672	1.6537	2.281	0	0	0	0	0	0	0	0	0	0
-1.6716	1.5981	2.208	0	0	0	0	0	0	0	0	0	0
-1.6712	1.5438	2.1365	0	0	0	0	0	0	0	0	0	0
-1.6708	1.491	2.0665	0	0	0	0	0	0	0	0	0	0
-1.6704	1.4396	1.998	0	0	0	0	0	0	0	0	0	0
-1.67	1.3896	1.9309	0	0	0	0	0	0	0	0	0	0
-1.6696	1.341	1.8653	0	0	0	0	0	0	0	0	0	0
-1.6692	1.2938	1.8012	0	0	0	0	0	0	0	0	0	0
-1.6688	1.248	1.7385	0	0	0	0	0	0	0	0	0	0
-1.6684	1.2036	1.6773	0	0	0	0	0	0	0	0	0	0
-1.668	1.1604	1.6175	0	0	0	0	0	0	0	0	0	0
-1.6676	1.1187	1.5591	0	0	0	0	0	0	0	0	0	0
-1.6672	1.0782	1.5022	0	0	0	0	0	0	0	0	0	0
-1.6668	1.0391	1.4467	0	0	0	0	0	0	0	0	0	0
-1.6664	1.0012	1.3926	0	0	0	0	0	0	0	0	0	0
-1.666	0.96464	1.3399	0	0	0	0	0	0	0	0	0	0
-1.6656	0.92934	1.2885	0	0	0	0	0	0	0	0	0	0
-1.6652	0.89529	1.2385	0	0	0	0	0	0	0	0	0	0
-1.6648	0.86248	1.1899	0	0	0	0	0	0	0	0	0	0
-1.6644	0.83088	1.1426	0	0	0	0	0	0	0	0	0	0
-1.664	0.80049	1.0966	0	0	0	0	0	0	0	0	0	0
-1.6636	0.77129	1.0519	0	0	0	0	0	0	0	0	0	0
-1.6632	0.74326	1.0085	0	0	0	0	0	0	0	0	0	0
-1.6628	0.71638	0.96642	0	0	0	0	0	0	0	0	0	0
-1.6624	0.69065	0.92558	0	0	0	0	0	0	0	0	0	0
-1.662	0.66605	0.886	0	0	0	0	0	0	0	0	0	0
-1.6616	0.64255	0.84769	0	0	0	0	0	0	0	0	0	0
-1.6612	0.62015	0.81063	0	0	0	0	0	0	0	0	0	0
-1.6608	0.59883	0.77483	0	0	0	0	0	0	0	0	0	0
-1.6604	0.57857	0.74029	0	0	0	0	0	0	0	0	0	0
-1.66	0.55803	0.70447	0	0	0	0	0	0	0	0	0	0
-1.6596	0.53996	0.6727	0	0	0	0	0	0	0	0	0	0
-1.6592	0.52291	0.64222	0	0	0	0	0	0	0	0	0	0
-1.6588	0.50686	0.61307	0	0	0	0	0	0	0	0	0	0
-1.6584	0.4918	0.58531	0	0	0	0	0	0	0	0	0	0
-1.658	0.47645	0.55904	0	0	0	0	0	0	0	0	0	0
-1.6576	0.46342	0.53411	0	0	0	0	0	0	0	0	0	0
-1.6572	0.45134	0.51076	0	0	0	0	0	0	0	0	0	0
-1.6568	0.44019	0.48908	0	0	0	0	0	0	0	0	0	0
-1.6564	0.42997	0.46918	0	0	0	0	0	0	0	0	0	0
-1.656	0.42066	0.45118	0	0	0	0	0	0	0	0	0	0
-1.6556	0.41225	0.4352	0	0	0	0	0	0	0	0	0	0
-1.6552	0.40474	0.42139	0	0	0	0	0	0	0	0	0	0
-1.6548	0.39811	0.40988	0	0	0	0	0	0	0	0	0	0
-1.6544	0.39236	0.40079	0	0	0	0	0	0	0	0	0	0
-1.654	0.38887	0.39372	0	0	0	0	0	0	0	0	0	0
-1.6536	0.38497	0.38974	0	0	0	0	0	0	0	0	0	0
-1.6532	0.38193	0.38844	0	0	0	0	0	0	0	0	0	0
-1.6528	0.37975	0.38984	0	0	0	0	0	0	0	0	0	0
-1.6524	0.37843	0.39393	0	0	0	0	0	0	0	0	0	0
-1.652	0.37795	0.40064	0	0	0	0	0	0	0	0	0	0
-1.6516	0.37832	0.40988	0	0	0	0	0	0	0	0	0	0
-1.6512	0.37952	0.42154	0	0	0	0	0	0	0	0	0	0
-1.6508	0.38157	0.43547	0	0	0	0	0	0	0	0	0	0
-1.6504	0.38445	0.45155	0	0	0	0	0	0	0	0	0	0
-1.65	0.38816	0.46964	0	0	0	0	0	0	0	0	0	0
-1.6496	0.3927	0.48961	0	0	0	0	0	0	0	0	0	0
-1.6492	0.39808	0.51133	0	0	0	0	0	0	0	0	0	0
-1.6488	0.40428	0.53471	0	0	0	0	0	0	0	0	0	0
-1.6484	0.41131	0.55965	0	0	0	0	0	0	0	0	0	0
-1.648	0.41916	0.58608	0	0	0	0	0	0	0	0	0	0
-1.6476	0.42785	0.61392	0	0	0	0	0	0	0	0	0	0
-1.6472	0.43736	0.64313	0	0	0	0	0	0	0	0	0	0
-1.6468	0.4477	0.67367	0	0	0	0	0	0	0	0	0	0
-1.6464	0.45888	0.7055	0	0	0	0	0	0	0	0	0	0
-1.646	0.47089	0.73859	0	0	0	0	0	0	0	0	0	0
-1.6456	0.48373	0.77293	0	0	0	0	0	0	0	0	0	0
-1.6453	0.49741	0.80851	0	0	0	0	0	0	0	0	0	0
-1.6449	0.51193	0.84532	0	0	0	0	0	0	0	0	0	0
-1.6445	0.52729	0.88336	0	0	0	0	0	0	0	0	0	0
-1.6441	0.5435	0.92262	0	0	0	0	0	0	0	0	0	0
-1.6437	0.56055	0.96311	0	0	0	0	0	0	0	0	0	0
-1.6433	0.57846	1.0048	0	0	0	0	0	0	0	0	0	0
-1.6429	0.59722	1.0478	0	0	0	0	0	0	0	0	0	0
-1.6425	0.61684	1.092	0	0	0	0	0	0	0	0	0	0
-1.6421	0.63731	1.1375	0	0	0	0	0	0	0	0	0	0
-1.6417	0.65865	1.1843	0	0	0	0	0	0	0	0	0	0
-1.6413	0.68086	1.2323	0	0	0	0	0	0	0	0	0	0
-1.6409	0.70394	1.2816	0	0	0	0	0	0	0	0	0	0
-1.6405	0.72789	1.3322	0	0	0	0	0	0	0	0	0	0
-1.6401	0.75271	1.3842	0	0	0	0	0	0	0	0	0	0
-1.6397	0.77841	1.4374	0	0	0	0	0	0	0	0	0	0
-1.6393	0.805	1.492	0	0	0	0	0	0	0	0	0	0
-1.6389	0.83246	1.5478	0	0	0	0	0	0	0	0	0	0
-1.6385	0.86081	1.6051	0	0	0	0	0	0	0	0	0	0
-1.6381	0.89004	1.6636	0	0	0	0	0	0	0	0	0	0
-1.6377	0.92016	1.7235	0	0	0	0	0	0	0	0	0	0
-1.6373	0.95116	1.7847	0	0	0	0	0	0	0	0	0	0
-1.6369	0.98306	1.8473	0	0	0	0	0	0	0	0	0	0
-1.6365	1.0158	1.9112	0	0	0	0	0	0	0	0	0	0
-1.6361	1.0495	1.9764	0	0	0	0	0	0	0	0	0	0
-1.6357	1.084	2.043	0	0	0	0	0	0	0	0	0	0
-1.6353	1.1195	2.1109	0	0	0	0	0	0	0	0	0	0
-1.6349	1.1558	2.18	0	0	0	0	0	0	0	0	0	0
-1.6345	1.193	2.2505	0	0	0	0	0	0	0	0	0	0
-1.6341	1.231	2.3223	0	0	0	0	0	0	0	0	0	0
-1.6337	1.2686	2.3959	0	0	0	0	0	0	0	0	0	0
-1.6333	1.3085	2.4701	0	0	0	0	0	0	0	0	0	0
-1.6329	1.3493	2.5456	0	0	0	0	0	0	0	0	0	0
-1.6325	1.3909	2.6222	0	0	0	0	0	0	0	0	0	0
-1.6321	1.4333	2.7001	0	0	0	0	0	0	0	0	0	0
-1.6317	1.4766	2.7791	0	0	0	0	0	0	0	0	0	0
-1.6313	1.5206	2.8592	0	0	0	0	0	0	0	0	0	0
-1.6309	1.5655	2.9404	0	0	0	0	0	0	0	0	0	0
-1.6305	1.6112	3.0227	0	0	0	0	0	0	0	0	0	0
-1.6301	1.6577	3.106	0	0	0	0	0	0	0	0	0	0
-1.6297	1.705	3.1902	0	0	0	0	0	0	0	0	0	0
-1.6293	1.753	3.2755	0	0	0	0	0	0	0	0	0	0
-1.6289	1.8018	3.3616	0	0	0	0	0	0	0	0	0	0
-1.6285	1.8513	3.4485	0	0	0	0	0	0	0	0	0	0
-1.6281	1.9016	3.5363	0	0	0	0	0	0	0	0	0	0
-1.6277	1.9525	3.6248	0	0	0	0	0	0	0	0	0	0
-1.6273	2.0042	3.714	0	0	0	0	0	0	0	0	0	0
-1.6269	2.0565	3.8039	0	0	0	0	0	0	0	0	0	0
-1.6265	2.1095	3.8944	0	0	0	0	0	0	0	0	0	0
-1.6261	2.1631	3.9853	0	0	0	0	0	0	0	0	0	0
-1.6257	2.2173	4.0768	0	0	0	0	0	0	0	0	0	0
-1.6253	2.2721	4.1686	0	0	0	0	0	0	0	0	0	0
-1.6249	2.3275	4.2608	0	0	0	0	0	0	0	0	0	0
-1.6245	2.3835	4.3533	0	0	0	0	0	0	0	0	0	0
-1.6241	2.4399	4.4459	0	0	0	0	0	0	0	0	0	0
-1.6237	2.4969	4.5387	0	0	0	0	0	0	0	0	0	0
-1.6233	2.553	4.6323	0	0	0	0	0	0	0	0	0	0
-1.6229	2.6109	4.7251	0	0	0	0	0	0	0	0	0	0
-1.6225	2.6693	4.8178	0	0	0	0	0	0	0	0	0	0
-1.6221	2.7281	4.9103	0	0	0	0	0	0	0	0	0	0
-1.6217	2.7873	5.0026	0	0	0	0	0	0	0	0	0	0
-1.6213	2.8467	5.0946	0	0	0	0	0	0	0	0	0	0
-1.6209	2.9065	5.1862	0	0	0	0	0	0	0	0	0	0
-1.6205	2.9666	5.2773	0	0	0	0	0	0	0	0	0	0
-1.6201	3.0268	5.3679	0	0	0	0	0	0	0	0	0	0
-1.6197	3.0873	5.4578	0	0	0	0	0	0	0	0	0	0
-1.6193	3.148	5.547	0	0	0	0	0	0	0	0	0	0
-1.6189	3.2089	5.6354	0	0	0	0	0	0	0	0	0	0
-1.6185	3.2698	5.723	0	0	0	0	0	0	0	0	0	0
-1.6181	3.3309	5.8095	0	0	0	0	0	0	0	0	0	0
-1.6178	3.392	5.8951	0	0	0	0	0	0	0	0	0	0
-1.6174	3.4531	5.9795	0	0	0	0	0	0	0	0	0	0
-1.617	3.5142	6.0627	0	0	0	0	0	0	0	0	0	0
-1.6166	3.5753	6.1446	0	0	0	0	0	0	0	0	0	0
-1.6162	3.6363	6.2252	0	0	0	0	0	0	0	0	0	0
-1.6158	3.6972	6.3044	0	0	0	0	0	0	0	0	0	0
-1.6154	3.758	6.382	0	0	0	0	0	0	0	0	0	0
-1.615	3.8186	6.4581	0	0	0	0	0	0	0	0	0	0
-1.6146	3.8789	6.5325	0	0	0	0	0	0	0	0	0	0
-1.6142	3.9391	6.6052	0	0	0	0	0	0	0	0	0	0
-1.6138	3.999	6.6761	0	0	0	0	0	0	0	0	0	0
-1.6134	4.0585	6.7452	0	0	0	0	0	0	0	0	0	0
-1.613	4.1178	6.8124	0	0	0	0	0	0	0	0	0	0
-1.6126	4.1766	6.8776	0	0	0	0	0	0	0	0	0	0
-1.6122	4.2351	6.9408	0	0	0	0	0	0	0	0	0	0
-1.6118	4.2932	7.002	0	0	0	0	0	0	0	0	0	0
-1.6114	4.3508	7.061	0	0	0	0	0	0	0	0	0	0
-1.611	4.4079	7.1178	0	0	0	0	0	0	0	0	0	0
-1.6106	4.4644	7.1725	0	0	0	0	0	0	0	0	0	0
-1.6102	4.5205	7.2249	0	0	0	0	0	0	0	0	0	0
-1.6098	4.5759	7.275	0	0	0	0	0	0	0	0	0	0
-1.6094	4.6308	7.3228	0	0	0	0	0	0	0	0	0	0
-1.609	4.685	7.3683	0	0	0	0	0	0	0	0	0	0
-1.6086	4.7385	7.4115	0	0	0	0	0	0	0	0	0	0
-1.6082	4.7914	7.4523	0	0	0	0	0	0	0	0	0	0
-1.6078	4.8436	7.4907	0	0	0	0	0	0	0	0	0	0
-1.6074	4.895	7.5268	0	0	0	0	0	0	0	0	0	0
-1.607	4.9456	7.5605	0	0	0	0	0	0	0	0	0	0
-1.6066	4.9955	7.5918	0	0	0	0	0	0	0	0	0	0
-1.6062	5.0446	7.6208	0	0	0	0	0	0	0	0	0	0
-1.6058	5.0928	7.6474	0	0	0	0	0	0	0	0	0	0
-1.6054	5.1402	7.6717	0	0	0	0	0	0	0	0	0	0
-1.605	5.1867	7.6937	0	0	0	0	0	0	0	0	0	0
-1.6046	5.2323	7.7135	0	0	0	0	0	0	0	0	0	0
-1.6042	5.277	7.731	0	0	0	0	0	0	0	0	0	0
-1.6038	5.3208	7.7464	0	0	0	0	0	0	0	0	0	0
-1.6034	5.3637	7.7597	0	0	0	0	0	0	0	0	0	0
-1.603	5.4055	7.7709	0	0	0	0	0	0	0	0	0	0
-1.6026	5.4464	7.78	0	0	1	0	0	0	0	0	0	0
-1.6022	5.4863	7.7873	0	0	0	0	0	0	0	0	0	0
-1.6018	5.5252	7.7927	0	0	0	0	0	0	0	0	0	0
-1.6014	5.563	7.7962	0	0	0	0	0	0	0	0	0	0
-1.601	5.5998	7.7981	0	0	0	0	0	0	0	0	0	0
-1.6006	5.6356	7.7984	0	0	0	0	0	0	0	0	0	0
-1.6002	5.6703	7.7971	0	0	0	0	0	0	0	0	0	0
-1.5998	5.7039	7.7944	0	0	0	0	0	0	0	0	0	0
-1.5994	5.7364	7.7903	0	0	0	0	0	0	0	0	0	0
-1.599	5.7678	7.785	0	0	0	0	0	0	0	0	0	0
-1.5986	5.7982	7.7786	0	0	0	0	0	0	0	0	0	0
-1.5982	5.8274	7.7711	0	0	0	0	0	0	0	0	0	0
-1.5978	5.8555	7.7627	0	0	0	0	0	0	0	0	0	0
-1.5974	5.8825	7.7536	0	0	0	0	0	0	0	0	0	0
-1.597	5.9083	7.7437	0	0	0	0	0	0	0	0	0	0
-1.5966	5.933	7.7333	0	0	0	0	0	0	0	0	0	0
-1.5962	5.9565	7.7224	0	0	0	0	0	0	0	0	0	0
-1.5958	5.9789	7.7112	0	0	0	0	0	0	0	0	0	0
-1.5954	6.0001	7.6998	0	0	0	0	0	0	0	0	0	0
-1.595	6.0202	7.6883	0	0	0	0	0	0	0	0	0	0
-1.5946	6.039	7.6767	0	0	0	0	0	0	0	0	0	0
-1.5942	6.0568	7.6653	0	0	0	0	0	0	0	0	0	0
-1.5938	6.0733	7.6542	0	0	0	0	0	0	0	0	0	0
-1.5934	6.0886	7.6433	0	0	0	0	0	0	0	0	0	0
-1.593	6.1028	7.6329	0	0	0	0	0	0	0	0	0	0
-1.5926	6.1158	7.623	0	0	0	0	0	0	0	0	0	0
-1.5922	6.1276	7.6137	0	0	0	0	0	0	0	0	0	0
-1.5918	6.1382	7.6051	0	0	0	0	0	0	0	0	0	0
-1.5914	6.1476	7.5973	0	0	0	0	0	0	0	0	0	0
-1.591	6.1558	7.5903	0	0	0	0	0	0	0	0	0	0
-1.5906	6.1628	7.5843	0	0	0	0	0	0	0	0	0	0
-1.5903	6.1687	7.5792	0	0	0	0	0	0	0	0	0	0
-1.5899	6.1733	7.575	0	0	0	0	0	0	0	0	0	0
-1.5895	6.1767	7.572	0	0	0	0	0	0	0	0	0	0
-1.5891	6.1789	7.57	0	0	0	0	0	0	0	0	0	0
-1.5887	6.18	7.569	0	0	0	0	0	0	0	0	0	0
-1.5883	6.1798	7.5692	0	0	0	0	0	0	0	0	0	0
-1.5879	6.1784	7.5704	0	0	0	0	0	0	0	0	0	0
-1.5875	6.1758	7.5728	0	0	0	0	0	0	0	0	0	0
-1.5871	6.1721	7.5761	0	0	0	0	0	0	0	0	0	0
-1.5867	6.1671	7.5805	0	0	0	0	0	0	0	0	0	0
-1.5863	6.1609	7.5859	0	0	0	0	0	0	0	0	0	0
-1.5859	6.1536	7.5923	0	0	0	0	0	0	0	0	0	0
-1.5855	6.145	7.5995	0	0	0	0	0	0	0	0	0	0
-1.5851	6.1352	7.6075	0	0	0	0	0	0	0	0	0	0
-1.5847	6.1243	7.6163	0	0	0	0	0	0	0	0	0	0
-1.5843	6.1121	7.6258	0	0	0	0	0	0	0	0	0	0
-1.5839	6.0988	7.6359	0	0	0	0	0	0	0	0	0	0
-1.5835	6.0843	7.6464	0	0	0	0	0	0	0	0	0	0
-1.5831	6.0686	7.6574	0	0	0	0	0	0	0	0	0	0
-1.5827	6.0517	7.6686	0	0	0	0	0	0	0	0	0	0
-1.5823	6.0337	7.6801	0	0	0	0	0	0	0	0	0	0
-1.5819	6.0145	7.6916	0	0	0	0	0	0	0	0	0	0
-1.5815	5.9941	7.7031	0	0	0	0	0	0	0	0	0	0
-1.5811	5.9725	7.7145	0	0	0	0	0	0	0	0	0	0
-1.5807	5.9498	7.7256	0	0	0	0	0	0	0	0	0	0
-1.5803	5.9259	7.7364	0	0	0	0	0	0	0	0	0	0
-1.5799	5.9009	7.7466	0	0	0	0	0	0	0	0	0	0
-1.5795	5.8748	7.7563	0	0	0	0	0	0	0	0	0	0
-1.5791	5.8475	7.7652	0	0	0	0	0	0	0	0	0	0
-1.5787	5.819	7.7734	0	0	0	0	0	0	0	0	0	0
-1.5783	5.7895	7.7805	0	0	0	0	0	0	0	0	0	0
-1.5779	5.7588	7.7866	0	0	0	0	0	0	0	0	0	0
-1.5775	5.7271	7.7916	0	0	0	0	0	0	0	0	0	0
-1.5771	5.6942	7.7953	0	0	0	0	0	0	0	0	0	0
-1.5767	5.6603	7.7976	0	0	0	0	0	0	0	0	0	0
-1.5763	5.6253	7.7985	0	0	0	0	0	0	0	0	0	0
-1.5759	5.5892	7.7977	0	0	0	0	0	0	0	0	0	0
-1.5755	5.5521	7.7954	0	0	0	0	0	0	0	0	0	0
-1.5751	5.514	7.7913	0	0	0	0	0	0	0	0	0	0
-1.5747	5.4748	7.7854	0	0	0	0	0	0	0	0	0	0
-1.5743	5.4346	7.7776	0	0	0	0	0	0	0	0	0	0
-1.5739	5.3935	7.7678	0	0	0	0	0	0	1	0	0	0
-1.5735	5.3513	7.756	0	0	0	0	0	0	0	0	0	0
-1.5731	5.3082	7.7422	0	0	0	0	0	0	0	0	0	0
-1.5727	5.2642	7.7262	0	0	0	0	0	0	0	0	0	0
-1.5723	5.2192	7.708	0	0	0	0	0	0	0	0	0	0
-1.5719	5.1733	7.6876	0	0	0	0	0	0	0	0	0	0
-1.5715	5.1266	7.6649	0	0	0	0	0	0	0	0	0	0
-1.5711	5.0789	7.6399	0	0	0	0	0	0	0	0	0	0
-1.5707	5.0304	7.6126	0	0	0	0	0	0	0	0	0	0
-1.5703	4.9811	7.583	0	0	0	0	0	0	0	0	0	0
-1.5699	4.931	7.551	0	0	0	0	0	0	0	0	0	0
-1.5695	4.8802	7.5166	0	0	0	0	0	0	0	0	0	0
-1.5691	4.8285	7.4798	0	0	0	0	0	0	0	0	0	0
-1.5687	4.7761	7.4407	0	0	0	0	0	0	0	0	0	0
-1.5683	4.7231	7.3992	0	0	0	0	0	0	0	0	0	0
-1.5679	4.6693	7.3554	0	0	0	0	0	0	0	0	0	0
-1.5675	4.6149	7.3092	0	0	0	0	0	0	0	0	0	0
-1.5671	4.5599	7.2607	0	0	0	0	0	0	0	0	0	0
-1.5667	4.5043	7.2099	0	0	0	0	0	0	0	0	0	0
-1.5663	4.4481	7.1569	0	0	0	0	0	0	0	0	0	0
-1.5659	4.3913	7.1016	0	0	0	0	0	0	0	0	0	0
-1.5655	4.3341	7.0441	0	0	0	0	0	0	0	0	0	0
-1.5651	4.2764	6.9845	0	0	0	0	0	0	0	0	0	0
-1.5647	4.2182	6.9227	0	0	0	0	0	0	0	0	0	0
-1.5643	4.1596	6.8589	0	0	0	0	0	0	0	0	0	0
-1.5639	4.1006	6.7931	0	0	0	0	0	0	0	0	0	0
-1.5635	4.0413	6.7254	0	0	0	0	0	0	0	0	0	0
-1.5632	3.9816	6.6558	0	0	0	0	0	0	0	0	0	0
-1.5628	3.9217	6.5843	0	0	0	0	0	0	0	0	0	0
-1.5624	3.8615	6.5111	0	0	0	0	0	0	0	0	0	0
-1.562	3.801	6.4362	0	0	0	0	0	0	0	0	0	0
-1.5616	3.7404	6.3596	0	0	0	0	0	0	0	0	0	0
-1.5612	3.6796	6.2816	0	0	0	0	0	0	0	0	0	0
-1.5608	3.6186	6.202	0	0	0	0	0	0	0	0	0	0
-1.5604	3.5576	6.121	0	0	0	0	0	0	0	0	0	0
-1.56	3.4965	6.0387	0	0	0	0	0	0	0	0	0	0
-1.5596	3.4354	5.9551	0	0	0	0	0	0	0	0	0	0
-1.5592	3.3743	5.8704	0	0	0	0	0	0	0	0	0	0
-1.5588	3.3132	5.7845	0	0	0	0	0	0	0	0	0	0
-1.5584	3.2521	5.6977	0	0	0	0	0	0	0	0	0	0
-1.558	3.1926	5.6091	0	0	0	0	0	0	0	0	0	0
-1.5576	3.1319	5.5204	0	0	0	0	0	0	0	0	0	0
-1.5572	3.0714	5.4309	0	0	0	0	0	0	0	0	0	0
-1.5568	3.0111	5.3407	0	0	0	0	0	0	0	0	0	0
-1.5564	2.951	5.2499	0	0	0	0	0	0	0	0	0	0
-1.556	2.8912	5.1586	0	0	0	0	0	0	0	0	0	0
-1.5556	2.8316	5.0668	0	0	0	0	0	0	0	0	0	0
-1.5552	2.7724	4.9746	0	0	0	0	0	0	0	0	0	0
-1.5548	2.7136	4.8821	0	0	0	0	0	0	0	0	0	0
-1.5544	2.6551	4.7894	0	0	0	0	0	0	0	0	0	0
-1.554	2.5971	4.6966	0	0	0	0	0	0	0	0	0	0
-1.5536	2.5394	4.6036	0	0	0	0	0	0	0	0	0	0
-1.5532	2.4823	4.5107	0	0	0	0	0	0	0	0	0	0
-1.5528	2.4256	4.4179	0	0	0	0	0	0	0	0	0	0
-1.5524	2.3695	4.3252	0	0	0	0	0	0	0	0	0	0
-1.552	2.3138	4.2327	0	0	0	0	0	0	0	0	0	0
-1.5516	2.2588	4.1405	0	0	0	0	0	0	0	0	0	0
-1.5512	2.2043	4.0487	0	0	0	0	0	0	0	0	0	0
-1.5508	2.1505	3.9573	0	0	0	0	0	0	0	0	0	0
-1.5504	2.0973	3.8663	0	0	0	0	0	0	0	0	0	0
-1.55	2.0447	3.7759	0	0	0	0	0	0	0	0	0	0
-1.5496	1.9928	3.6861	0	0	0	0	0	0	0	0	0	0
-1.5492	1.9416	3.597	0	0	0	0	0	0	0	0	0	0
-1.5488	1.8912	3.5085	0	0	0	0	0	0	0	0	0	0
-1.5484	1.8414	3.4208	0	0	0	0	0	0	0	0	0	0
-1.548	1.7924	3.334	0	0	0	0	0	0	0	0	0	0
-1.5476	1.7442	3.2479	0	0	0	0	0	0	0	0	0	0
-1.5472	1.6995	3.1615	0	0	0	0	0	0	0	0	0	0
-1.5468	1.653	3.0772	0	0	0	0	0	0	0	0	0	0
-1.5464	1.6074	2.9939	0	0	0	0	0	0	0	0	0	0
-1.546	1.5626	2.9116	0	0	0	0	0	0	0	0	0	0
-1.5456	1.5187	2.8304	0	0	0	0	0	0	0	0	0	0
-1.5452	1.4756	2.7502	0	0	0	0	0	0	0	0	0	0
-1.5448	1.4334	2.6711	0	0	0	0	0	0	0	0	0	0
-1.5444	1.3921	2.5932	0	0	0	0	0	0	0	0	0	0
-1.544	1.3517	2.5164	0	0	0	0	0	0	0	0	0	0
-1.5436	1.3121	2.4409	0	0	0	0	0	0	0	0	0	0
-1.5432	1.2735	2.3665	0	0	0	0	0	0	0	0	0	0
-1.5428	1.2359	2.2934	0	0	0	0	0	0	0	0	0	0
-1.5424	1.1991	2.2215	0	0	0	0	0	0	0	0	0	0
-1.542	1.1633	2.1509	0	0	0	0	0	0	0	0	0	0
-1.5416	1.1298	2.0843	0	0	0	0	0	0	0	0	0	0
-1.5412	1.0961	2.0164	0	0	0	0	0	0	0	0	0	0
-1.5408	1.0632	1.9499	0	0	0	0	0	0	0	0	0	0
-1.5404	1.0314	1.8847	0	0	0	0	0	0	0	0	0	0
-1.54	1.0005	1.8208	0	0	0	0	0	0	0	0	0	0
-1.5396	0.9706	1.7582	0	0	0	0	0	0	0	0	0	0
-1.5392	0.94169	1.697	0	0	0	0	0	0	0	0	0	0
-1.5388	0.91378	1.6371	0	0	0	0	0	0	0	0	0	0
-1.5384	0.88687	1.5786	0	0	0	0	0	0	0	0	0	0
-1.538	0.86095	1.5213	0	0	0	0	0	0	0	0	0	0
-1.5376	0.83605	1.4655	0	0	0	0	0	0	0	0	0	0
-1.5372	0.81216	1.4109	0	0	0	0	0	0	0	0	0	0
-1.5368	0.78928	1.3577	0	0	0	0	0	0	0	0	0	0
-1.5364	0.76743	1.3058	0	0	0	0	0	0	0	0	0	0
-1.536	0.7466	1.2553	0	0	0	0	0	0	0	0	0	0
-1.5357	0.72679	1.2061	0	0	0	0	0	0	0	0	0	0
-1.5353	0.70802	1.1582	0	0	0	0	0	0	0	0	0	0
-1.5349	0.69029	1.1117	0	0	0	0	0	0	0	0	0	0
-1.5345	0.6736	1.0665	0	0	0	0	0	0	0	0	0	0
-1.5341	0.65796	1.0226	0	0	0	0	0	0	0	0	0	0
-1.5337	0.64337	0.98016	0	0	0	0	0	0	0	0	0	0
-1.5333	0.62984	0.93904	0	0	0	0	0	0	0	0	0	0
-1.5329	0.61738	0.89931	0	0	0	0	0	0	0	0	0	0
-1.5325	0.60598	0.86098	0	0	0	0	0	0	0	0	0	0
-1.5321	0.59567	0.82411	0	0	0	0	0	0	0	0	0	0
-1.5317	0.58643	0.78871	0	0	0	0	0	0	0	0	0	0
-1.5313	0.5783	0.75483	0	0	0	0	0	0	0	0	0	0
-1.5309	0.57126	0.72254	0	0	0	0	0	0	0	0	0	0
-1.5305	0.56533	0.69189	0	0	0	0	0	0	0	0	0	0
-1.5301	0.56051	0.66297	0	0	0	0	0	0	0	0	0	0
-1.5297	0.55683	0.63587	0	0	0	0	0	0	0	0	0	0
-1.5293	0.55429	0.61069	0	0	0	0	0	0	0	0	0	0
-1.5289	0.55289	0.58754	0	0	0	0	0	0	0	0	0	0
-1.5285	0.55266	0.56656	0	0	0	0	0	0	0	0	0	0
-1.5281	0.55361	0.54787	0	0	0	0	0	0	0	0	0	0
-1.5277	0.55574	0.53162	0	0	0	0	0	0	0	0	0	0
-1.5273	0.55907	0.51795	0	0	0	0	0	0	0	0	0	0
-1.5269	0.56362	0.50697	0	0	0	0	0	0	0	0	0	0
-1.5265	0.5694	0.4988	0	0	0	0	0	0	0	0	0	0
-1.5261	0.57642	0.49353	0	0	0	0	0	0	0	0	0	0
-1.5257	0.58472	0.4912	0	0	0	0	0	0	0	0	0	0
-1.5253	0.59429	0.49182	0	0	0	0	0	0	0	0	0	0
-1.5249	0.60517	0.49538	0	0	0	0	0	0	0	0	0	0
-1.5245	0.61737	0.50181	0	0	0	0	0	0	0	0	0	0
-1.5241	0.6309	0.51102	0	0	0	0	0	0	0	0	0	0
-1.5237	0.6458	0.52287	0	0	0	0	0	0	0	0	0	0
-1.5233	0.66209	0.53723	0	0	0	0	0	0	0	0	0	0
-1.5229	0.67977	0.55395	0	0	0	0	0	0	0	0	0	0
-1.5225	0.69763	0.57342	0	0	0	0	0	0	0	0	0	0
-1.5221	0.7183	0.59434	0	0	0	0	0	0	0	0	0	0
-1.5217	0.74044	0.61719	0	0	0	0	0	0	0	0	0	0
-1.5213	0.76407	0.64183	0	0	0	0	0	0	0	0	0	0
-1.5209	0.78922	0.66816	0	0	0	0	0	0	0	0	0	0
-1.5205	0.81593	0.69607	0	0	0	0	0	0	0	0	0	0
-1.5201	0.84421	0.72546	0	0	0	0	0	0	0	0	0	0
-1.5197	0.87409	0.75627	0	0	0	0	0	0	0	0	0	0
-1.5193	0.90561	0.78842	0	0	0	0	0	0	0	0	0	0
-1.5189	0.93879	0.82186	0	0	0	0	0	0	0	0	0	0
-1.5185	0.97366	0.85654	0	0	0	0	0	0	0	0	0	0
-1.5181	1.0103	0.89242	0	0	0	0	0	0	0	0	0	0
-1.5177	1.0486	0.92947	0	0	0	0	0	0	0	0	0	0
-1.5173	1.0887	0.96767	0	0	0	0	0	0	0	0	0	0
-1.5169	1.1307	1.007	0	0	0	0	0	0	0	0	0	0
-1.5165	1.1745	1.0474	0	0	0	0	0	0	0	0	0	0
-1.5161	1.2201	1.0889	0	0	0	0	0	0	0	0	0	0
-1.5157	1.2677	1.1315	0	0	0	0	0	0	0	0	0	0
-1.5153	1.3172	1.1752	0	0	0	0	0	0	0	0	0	0
-1.5149	1.3687	1.2199	0	0	0	0	0	0	0	0	0	0
-1.5145	1.4222	1.2657	0	0	0	0	0	0	0	0	0	0
-1.5141	1.4777	1.3125	0	0	0	0	0	0	0	0	0	0
-1.5137	1.5353	1.3604	0	0	0	0	0	0	0	0	0	0
-1.5133	1.595	1.4093	0	0	0	0	0	0	0	0	0	0
-1.5129	1.6568	1.4592	0	0	0	0	0	0	0	0	0	0
-1.5125	1.7207	1.5102	0	0	0	0	0	0	0	0	0	0
-1.5121	1.7869	1.5622	0	0	0	0	0	0	0	0	0	0
-1.5117	1.8552	1.6152	0	0	0	0	0	0	0	0	0	0
-1.5113	1.9258	1.6692	0	0	0	0	0	0	0	0	0	0
-1.5109	1.9987	1.7242	0	0	0	0	0	0	0	0	0	0
-1.5105	2.0738	1.7802	0	0	0	0	0	0	0	0	0	0
-1.5101	2.1512	1.8372	0	0	0	0	0	0	0	0	0	0
-1.5097	2.231	1.8951	0	0	0	0	0	0	0	0	0	0
-1.5093	2.3132	1.9541	0	0	0	0	0	0	0	0	0	0
-1.5089	2.3977	2.0139	0	0	0	0	0	0	0	0	0	0
-1.5085	2.4847	2.0747	0	0	0	0	0	0	0	0	0	0
-1.5082	2.574	2.1364	0	0	0	0	0	0	0	0	0	0
-1.5078	2.6658	2.199	0	0	0	0	0	0	0	0	0	0
-1.5074	2.7601	2.2625	0	0	0	0	0	0	0	0	0	0
-1.507	2.8568	2.3269	0	0	0	0	0	0	0	0	0	0
-1.5066	2.956	2.3921	0	0	0	0	0	0	0	0	0	0
-1.5062	3.0576	2.4581	0	0	0	0	0	0	0	0	0	0
-1.5058	3.1618	2.5249	0	0	0	0	0	0	0	0	0	0
-1.5054	3.2684	2.5924	0	0	0	0	0	0	0	0	0	0
-1.505	3.3776	2.6607	0	0	0	0	0	0	0	0	0	0
-1.5046	3.4892	2.7298	0	0	0	0	0	0	0	0	0	0
-1.5042	3.6034	2.7995	0	0	0	0	0	0	0	0	0	0
-1.5038	3.72	2.8699	0	0	0	0	0	0	0	0	0	0
-1.5034	3.8391	2.9409	0	0	0	0	0	0	0	0	0	0
-1.503	3.9607	3.0125	0	0	0	0	0	0	0	0	0	0
-1.5026	4.0848	3.0846	0	0	0	0	0	0	0	0	0	0
-1.5022	4.2113	3.1573	0	0	0	0	0	0	0	0	0	0
-1.5018	4.3402	3.2305	0	0	0	0	0	0	0	0	0	0
-1.5014	4.4715	3.3041	0	0	0	0	0	0	0	0	0	0
-1.501	4.6052	3.3782	0	0	0	0	0	0	0	0	0	0
-1.5006	4.7413	3.4526	0	0	0	0	0	0	0	0	0	0
-1.5002	4.8797	3.5274	0	0	0	0	0	0	0	0	0	0
-1.4998	5.0203	3.6025	0	0	0	0	0	0	0	0	0	0
-1.4994	5.1632	3.6778	0	0	0	0	0	0	0	0	0	0
-1.499	5.3083	3.7534	0	0	0	0	0	0	0	0	0	0
-1.4986	5.4555	3.8292	0	0	0	0	0	0	0	0	0	0
-1.4982	5.6049	3.9051	0	0	0	0	0	0	0	0	0	0
-1.4978	5.7563	3.9811	0	0	0	0	0	0	0	0	0	0
-1.4974	5.9097	4.0571	0	0	0	0	0	0	0	0	0	0
-1.497	6.0651	4.1332	0	0	0	0	0	0	0	0	0	0
-1.4966	6.2223	4.2093	0	0	0	0	0	0	0	0	0	0
-1.4962	6.3827	4.2855	0	0	0	0	0	0	0	0	0	0
-1.4958	6.5436	4.3614	0	0	0	0	0	0	0	0	0	0
-1.4954	6.7062	4.4372	0	0	0	0	0	0	0	0	0	0
-1.495	6.8703	4.5128	0	0	0	0	0	0	0	0	0	0
-1.4946	7.036	4.5882	0	0	0	0	0	0	0	0	0	0
-1.4942	7.2018	4.6639	0	0	0	0	0	0	0	0	0	0
-1.4938	7.3703	4.7386	0	0	0	0	0	0	0	0	0	0
-1.4934	7.5401	4.8131	0	0	0	0	0	0	0	0	0	0
-1.493	7.7111	4.8871	0	0	0	0	0	0	0	0	0	0
-1.4926	7.8831	4.9608	0	0	0	0	0	0	0	0	0	0
-1.4922	8.056	5.034	0	0	0	0	0	0	0	0	0	0
-1.4918	8.2298	5.1067	0	0	0	0	0	0	0	0	0	0
-1.4914	8.4044	5.1789	0	0	0	0	0	0	0	0	0	0
-1.491	8.5795	5.2506	0	0	0	0	0	0	0	0	0	0
-1.4906	8.7552	5.3217	0	0	0	0	0	0	0	0	0	0
-1.4902	8.9313	5.3921	0	0	0	0	0	0	0	0	0	0
-1.4898	9.1077	5.4619	0	0	0	0	0	0	0	0	0	0
-1.4894	9.2842	5.5311	0	0	0	0	0	0	0	0	0	0
-1.489	9.4608	5.5995	0	0	0	0	0	0	0	0	0	0
-1.4886	9.6373	5.6672	0	0	0	0	0	0	0	0	0	0
-1.4882	9.8135	5.7341	0	0	0	0	0	0	0	0	0	0
-1.4878	9.9894	5.8003	0	0	0	0	0	0	0	0	0	0
-1.4874	10.165	5.8656	0	0	0	0	0	0	0	0	0	0
-1.487	10.34	5.9302	0	0	0	0	0	0	0	0	0	0
-1.4866	10.514	5.9938	0	0	0	0	0	0	0	0	0	0
-1.4862	10.687	6.0566	0	0	0	0	0	0	0	0	0	0
-1.4858	10.859	6.1185	0	0	0	0	0	0	0	0	0	0
-1.4854	11.03	6.1796	0	0	0	0	0	0	0	0	0	0
-1.485	11.2	6.2396	0	0	0	0	0	0	0	0	0	0
-1.4846	11.368	6.2988	0	0	0	0	0	0	0	0	0	0
-1.4842	11.534	6.357	0	0	0	0	0	0	0	0	0	0
-1.4838	11.699	6.4142	0	0	0	0	0	0	0	0	0	0
-1.4834	11.862	6.4704	0	0	0	0	0	0	0	0	0	0
-1.483	12.023	6.5257	0	0	0	0	0	0	0	0	0	0
-1.4826	12.182	6.5799	0	0	0	0	0	0	0	0	0	0
-1.4822	12.339	6.6331	0	0	0	0	0	0	0	0	0	0
-1.4818	12.493	6.6853	0	0	0	0	0	0	0	0	0	0
-1.4814	12.644	6.7365	0	0	0	0	0	0	0	0	0	0
-1.481	12.793	6.7866	0	0	0	0	0	0	0	0	0	0
-1.4807	12.939	6.8356	0	0	0	0	0	0	0	0	0	0
-1.4803	13.081	6.8836	0	0	0	0	0	0	0	0	0	0
-1.4799	13.221	6.9305	0	0	0	0	0	0	0	0	0	0
-1.4795	13.358	6.9763	0	0	0	0	0	0	0	0	0	0
-1.4791	13.491	7.0211	0	0	0	0	0	0	0	0	0	0
-1.4787	13.62	7.0647	0	0	0	0	0	0	0	0	0	0
-1.4783	13.746	7.1072	0	0	0	0	0	0	0	0	0	0
-1.4779	13.868	7.1486	0	0	0	0	1	0	0	0	0	0
-1.4775	13.987	7.1889	0	0	0	0	0	0	0	0	0	0
-1.4771	14.101	7.2281	0	0	0	0	0	0	0	0	0	0
-1.4767	14.211	7.2661	0	0	0	0	0	0	0	0	0	0
-1.4763	14.317	7.3029	0	0	0	0	0	0	0	0	0	0
-1.4759	14.419	7.3386	0	0	0	0	0	0	0	0	0	0
-1.4755	14.516	7.3731	0	0	0	0	0	0	0	0	0	0
-1.4751	14.609	7.4064	0	0	0	0	0	0	0	0	0	0
-1.4747	14.697	7.4385	0	0	0	0	0	0	0	0	0	0
-1.4743	14.781	7.4694	0	0	0	0	0	0	0	0	0	0
-1.4739	14.86	7.499	0	0	0	0	0	0	0	0	0	0
-1.4735	14.934	7.5274	0	0	0	0	0	0	0	0	0	0
-1.4731	15.003	7.5546	0	0	0	0	0	0	0	0	0	0
-1.4727	15.067	7.5805	0	0	0	0	0	0	0	0	0	0
-1.4723	15.126	7.6051	0	0	0	0	0	0	0	0	0	0
-1.4719	15.18	7.6285	0	0	0	0	0	0	0	0	0	0
-1.4715	15.229	7.6505	0	0	0	0	0	0	0	0	0	0
-1.4711	15.272	7.6711	0	0	0	0	0	0	0	0	0	0
-1.4707	15.311	7.6905	0	0	0	0	0	0	0	0	0	0
-1.4703	15.344	7.7084	0	0	0	0	0	0	0	0	0	0
-1.4699	15.372	7.725	0	0	0	0	0	0	0	0	0	0
-1.4695	15.395	7.7402	0	0	0	0	0	0	0	0	0	0
-1.4691	15.412	7.754	0	0	0	0	0	0	0	0	0	0
-1.4687	15.425	7.7663	0	0	0	0	0	0	0	0	0	0
-1.4683	15.432	7.7772	0	0	0	0	0	0	0	0	0	0
-1.4679	15.433	7.7867	0	0	0	0	0	0	0	0	0	0
-1.4675	15.43	7.7946	0	0	0	0	0	0	0	0	0	0
-1.4671	15.421	7.8011	0	0	1	0	0	1	0	0	0	0
-1.4667	15.407	7.8061	0	0	0	0	0	0	0	0	0	0
-1.4663	15.388	7.8096	0	0	0	0	0	0	0	0	0	0
-1.4659	15.364	7.8115	0	0	0	0	0	0	0	0	0	0
-1.4655	15.334	7.8119	0	0	0	0	0	0	0	0	0	0
-1.4651	15.3	7.8107	0	0	0	0	0	0	0	0	0	0
-1.4647	15.261	7.808	0	0	0	0	0	0	0	0	0	0
-1.4643	15.216	7.8038	0	0	0	0	0	0	0	0	0	0
-1.4639	15.167	7.7979	0	0	0	0	0	0	0	0	0	0
-1.4635	15.113	7.7906	0	0	0	0	0	0	0	0	0	0
-1.4631	15.055	7.7816	0	0	0	0	0	0	0	0	0	0
-1.4627	14.991	7.7711	0	0	0	0	0	0	0	0	0	0
-1.4623	14.924	7.759	0	0	0	0	0	0	0	0	0	0
-1.4619	14.852	7.7453	0	0	0	0	0	0	0	0	0	0
-1.4615	14.775	7.7301	0	0	0	0	0	0	1	0	0	0
-1.4611	14.694	7.7134	0	0	0	0	0	0	0	0	0	0
-1.4607	14.61	7.6952	0	0	0	0	0	0	0	0	0	0
-1.4603	14.521	7.6754	0	0	0	0	0	0	0	0	0	0
-1.4599	14.428	7.6542	0	0	0	0	0	0	0	0	0	0
-1.4595	14.332	7.6315	0	0	0	0	0	0	0	0	0	0
-1.4591	14.232	7.6074	0	0	0	0	0	0	0	0	0	0
-1.4587	14.128	7.5818	0	0	0	0	0	0	0	0	0	0
-1.4583	14.021	7.5549	0	0	0	0	0	0	0	0	0	0
-1.4579	13.911	7.5267	0	0	0	0	0	0	0	0	0	0
-1.4575	13.798	7.4972	0	0	0	0	0	0	0	0	0	0
-1.4571	13.682	7.4664	0	0	0	0	0	0	0	0	0	0
-1.4567	13.563	7.4344	0	0	0	0	0	0	0	0	0	0
-1.4563	13.442	7.4013	0	0	0	0	0	0	0	0	0	0
-1.4559	13.317	7.3671	0	0	0	0	0	0	0	0	0	0
-1.4555	13.191	7.3318	0	0	0	0	0	0	0	0	0	0
-1.4551	13.062	7.2956	0	0	0	0	0	0	0	0	0	0
-1.4547	12.932	7.2585	0	0	0	0	0	0	0	0	0	0
-1.4543	12.799	7.2205	0	0	0	0	0	0	0	0	0	0
-1.4539	12.665	7.1818	0	0	0	0	0	0	0	0	0	0
-1.4536	12.529	7.1424	0	0	0	0	0	0	0	0	0	0
-1.4532	12.391	7.1024	0	0	0	0	0	0	0	0	0	0
-1.4528	12.253	7.0618	0	0	0	0	0	0	0	0	0	0
-1.4524	12.113	7.0209	0	0	0	0	0	0	0	0	0	0
-1.452	11.972	6.9797	0	0	0	0	0	0	0	0	0	0
-1.4516	11.83	6.9382	0	0	0	0	0	0	0	0	0	0
-1.4512	11.688	6.8966	0	0	0	0	0	0	0	0	0	0
-1.4508	11.545	6.855	0	0	0	0	0	0	0	0	0	0
-1.4504	11.402	6.8134	0	0	0	0	0	0	0	0	0	0
-1.45	11.258	6.7721	0	0	0	0	0	0	0	0	0	0
-1.4496	11.114	6.7311	0	0	0	0	0	0	0	0	0	0
-1.4492	10.971	6.6905	0	0	0	0	0	0	0	0	0	0
-1.4488	10.827	6.6505	0	0	0	0	0	0	0	0	0	0
-1.4484	10.684	6.6112	0	0	0	0	0	0	0	0	0	0
-1.448	10.541	6.5726	0	0	0	0	0	0	0	0	0	0
-1.4476	10.399	6.535	0	0	0	0	0	0	0	0	0	0
-1.4472	10.258	6.4984	0	0	0	0	0	0	0	0	0	0
-1.4468	10.117	6.463	0	0	0	0	0	0	0	0	0	0
-1.4464	9.9771	6.4289	0	0	0	0	0	0	0	0	0	0
-1.446	9.8384	6.3962	0	0	0	0	0	0	0	0	0	0
-1.4456	9.7008	6.365	0	0	0	0	0	0	0	0	0	0
-1.4452	9.5645	6.3355	0	0	0	0	0	0	0	0	0	0
-1.4448	9.4295	6.3078	0	0	0	0	0	0	0	0	0	0
-1.4444	9.296	6.282	0	0	0	0	0	0	0	0	0	0
-1.444	9.1641	6.2582	0	0	0	0	0	0	0	0	0	0
-1.4436	9.0337	6.2365	0	0	0	0	0	0	0	0	0	0
-1.4432	8.9051	6.217	0	0	0	0	0	0	0	0	0	0
-1.4428	8.7783	6.1998	0	0	0	0	0	0	0	0	0	0
-1.4424	8.6534	6.185	0	0	0	0	0	0	0	0	0	0
-1.442	8.5304	6.1727	0	0	0	0	0	0	0	0	0	0
-1.4416	8.4094	6.1629	0	0	0	0	0	0	0	0	0	0
-1.4412	8.2905	6.1557	0	0	0	0	0	0	0	0	0	0
-1.4408	8.1737	6.1511	0	0	0	0	0	0	0	0	0	0
-1.4404	8.0591	6.1493	0	0	0	0	0	0	0	0	0	0
-1.44	7.9466	6.1502	0	0	0	0	0	0	0	0	0	0
-1.4396	7.8365	6.1538	0	0	0	0	0	0	0	0	0	0
-1.4392	7.7286	6.1602	0	0	0	0	0	0	0	0	0	0
-1.4388	7.623	6.1694	0	0	0	0	0	0	0	0	0	0
-1.4384	7.5198	6.1812	0	0	0	0	0	0	0	0	0	0
-1.438	7.419	6.1959	0	0	0	0	0	0	0	0	0	0
-1.4376	7.3205	6.2132	0	0	0	0	0	0	0	0	0	0
-1.4372	7.2244	6.2331	0	0	0	0	0	0	0	0	0	0
-1.4368	7.1307	6.2557	0	0	0	0	0	0	0	0	0	0
-1.4364	7.0394	6.2807	0	0	0	0	0	0	0	0	0	0
-1.436	6.9505	6.3082	0	0	0	0	0	0	0	0	0	0
-1.4356	6.864	6.3381	0	0	0	0	0	0	0	0	0	0
-1.4352	6.7799	6.3703	0	0	0	0	0	0	0	0	0	0
-1.4348	6.6981	6.4046	0	0	0	0	0	0	0	0	0	0
-1.4344	6.6187	6.441	0	0	0	0	0	0	0	0	0	0
-1.434	6.5416	6.4793	0	0	0	0	0	0	0	0	0	0
-1.4336	6.4667	6.5195	0	0	0	0	0	0	0	0	0	0
-1.4332	6.3941	6.5613	0	0	0	0	0	0	0	0	0	0
-1.4328	6.3238	6.6048	0	0	0	0	0	0	0	0	0	0
-1.4324	6.2556	6.6496	0	0	0	0	0	0	0	0	0	0
-1.432	6.1896	6.6958	0	0	0	0	0	0	0	0	0	0
-1.4316	6.1256	6.7431	0	0	0	0	0	0	0	0	0	0
-1.4312	6.0637	6.7914	0	0	0	0	0	0	0	0	0	0
-1.4308	6.0039	6.8405	0	0	0	0	0	0	0	0	0	0
-1.4304	5.9459	6.8904	0	0	0	0	0	0	0	0	0	0
-1.43	5.8899	6.9408	0	0	0	0	0	0	0	0	0	0
-1.4296	5.8357	6.9917	0	0	0	0	0	0	0	0	0	0
-1.4292	5.7832	7.0428	0	0	0	0	0	0	0	0	0	0
-1.4288	5.7325	7.094	0	0	0	0	0	0	0	0	0	0
-1.4284	5.6834	7.1452	0	0	0	0	0	0	0	0	0	0
-1.428	5.636	7.1963	0	0	0	0	0	0	0	0	0	0
-1.4276	5.59	7.247	0	0	0	0	0	0	0	0	0	0
-1.4272	5.5468	7.2971	0	0	0	0	0	0	0	0	0	0
-1.4268	5.5038	7.3467	0	0	0	0	0	0	0	0	0	0
-1.4264	5.4621	7.3956	0	0	0	0	0	0	0	0	0	0
-1.4261	5.4217	7.4437	0	0	0	0	0	0	0	0	0	0
-1.4257	5.3825	7.4907	0	0	0	0	0	0	0	0	0	0
-1.4253	5.3444	7.5367	0	0	0	0	0	0	0	0	0	0
-1.4249	5.3073	7.5814	0	0	0	0	0	0	0	0	0	0
-1.4245	5.2712	7.6247	0	0	0	0	0	0	0	0	0	0
-1.4241	5.236	7.6666	0	0	0	0	0	0	0	0	0	0
-1.4237	5.2017	7.7069	0	0	0	0	0	0	0	0	0	0
-1.4233	5.1681	7.7455	0	0	0	0	0	0	0	0	0	0
-1.4229	5.1352	7.7823	0	0	0	0	0	0	0	0	0	0
-1.4225	5.103	7.8172	0	0	0	0	0	0	0	0	0	0
-1.4221	5.0713	7.8501	0	0	0	0	0	0	0	0	0	0
-1.4217	5.0401	7.881	0	0	0	0	0	0	0	0	0	0
-1.4213	5.0094	7.9097	0	0	0	0	0	0	0	0	0	0
-1.4209	4.979	7.9361	0	0	0	0	0	0	0	0	0	0
-1.4205	4.949	7.9602	0	0	0	0	0	0	0	0	0	0
-1.4201	4.9192	7.9819	0	0	0	0	0	0	0	0	0	0
-1.4197	4.8896	8.0012	0	0	0	0	0	0	0	0	0	0
-1.4193	4.8601	8.018	0	0	0	0	0	0	0	0	0	0
-1.4189	4.8308	8.0321	0	0	0	0	0	0	0	0	0	0
-1.4185	4.8014	8.0437	0	0	0	0	0	0	0	0	0	0
-1.4181	4.7721	8.0525	0	0	0	0	0	0	0	0	0	0
-1.4177	4.7426	8.0587	0	0	0	0	0	0	0	0	0	0
-1.4173	4.7131	8.062	0	0	0	0	0	0	0	0	0	0
-1.4169	4.6834	8.0626	0	0	0	0	0	0	0	0	0	0
-1.4165	4.6535	8.0604	0	0	0	0	0	0	0	0	0	0
-1.4161	4.6234	8.0553	0	0	0	0	0	1	0	0	0	0
-1.4157	4.593	8.0473	0	0	0	0	0	0	0	0	0	0
-1.4153	4.5622	8.0365	0	0	0	0	0	0	0	0	0	0
-1.4149	4.5312	8.0227	0	0	0	0	0	0	0	0	0	0
-1.4145	4.4997	8.0061	0	0	0	0	0	0	0	0	0	0
-1.4141	4.4679	7.9866	0	0	0	0	0	0	0	0	0	0
-1.4137	4.4357	7.9641	0	0	0	0	0	0	0	0	0	0
-1.4133	4.403	7.9388	0	0	0	0	0	0	0	0	0	0
-1.4129	4.3698	7.9105	0	0	0	0	0	0	0	0	0	0
-1.4125	4.3362	7.8794	0	0	0	0	0	0	0	0	0	0
-1.4121	4.302	7.8455	0	0	0	0	0	0	0	0	0	0
-1.4117	4.2674	7.8087	0	0	0	0	0	0	0	0	0	0
-1.4113	4.2323	7.7692	0	0	0	0	0	0	0	0	0	0
-1.4109	4.1966	7.7268	0	0	0	0	0	0	0	0	0	0
-1.4105	4.1604	7.6817	0	0	0	0	0	0	0	0	0	0
-1.4101	4.1237	7.634	0	0	0	0	0	0	0	0	0	0
-1.4097	4.0864	7.5835	0	0	0	0	0	0	0	0	0	0
-1.4093	4.0487	7.5305	0	0	0	0	0	0	0	0	0	0
-1.4089	4.0104	7.4749	0	0	0	0	0	0	0	0	0	0
-1.4085	3.9716	7.4168	0	0	0	0	0	0	0	0	0	0
-1.4081	3.9324	7.3562	0	0	0	0	0	0	0	0	0	0
-1.4077	3.8926	7.2933	0	0	0	0	0	0	0	0	0	0
-1.4073	3.8524	7.228	0	0	0	0	0	0	0	0	0	0
-1.4069	3.8118	7.1604	0	0	0	0	0	0	0	0	0	0
-1.4065	3.7707	7.0906	0	0	0	0	0	0	0	0	0	0
-1.4061	3.7291	7.0187	0	0	0	0	0	0	0	0	0	0
-1.4057	3.6873	6.9446	0	0	0	0	0	0	0	0	0	0
-1.4053	3.645	6.8686	0	0	0	0	0	0	0	0	0	0
-1.4049	3.6024	6.7907	0	0	0	0	0	0	0	0	0	0
-1.4045	3.5595	6.7108	0	0	0	0	0	0	0	0	0	0
-1.4041	3.5163	6.6292	0	0	0	0	0	0	0	0	0	0
-1.4037	3.4729	6.5459	0	0	0	0	0	0	0	0	0	0
-1.4033	3.4293	6.461	0	0	0	0	0	0	0	0	0	0
-1.4029	3.3854	6.3745	0	0	0	0	0	0	0	0	0	0
-1.4025	3.3415	6.2866	0	0	0	0	0	0	0	0	0	0
-1.4021	3.2988	6.1966	0	0	0	0	0	0	0	0	0	0
-1.4017	3.2547	6.1059	0	0	0	0	0	0	0	0	0	0
-1.4013	3.2107	6.014	0	0	0	0	0	0	0	0	0	0
-1.4009	3.1666	5.921	0	0	0	0	0	0	0	0	0	0
-1.4005	3.1226	5.8269	0	0	0	0	0	0	0	0	0	0
-1.4001	3.0786	5.7319	0	0	0	0	0	0	0	0	0	0
-1.3997	3.0349	5.636	0	0	0	0	0	0	0	0	0	0
-1.3993	2.9912	5.5393	0	0	0	0	0	0	0	0	0	0
-1.3989	2.9478	5.442	0	0	0	0	0	0	0	0	0	0
-1.3986	2.9047	5.344	0	0	0	0	0	0	0	0	0	0
-1.3982	2.8619	5.2455	0	0	0	0	0	0	0	0	0	0
-1.3978	2.8181	5.1472	0	0	0	0	0	0	0	0	0	0
-1.3974	2.7761	5.0479	0	0	0	0	0	0	0	0	0	0
-1.397	2.7345	4.9483	0	0	0	0	0	0	0	0	0	0
-1.3966	2.6934	4.8486	0	0	0	0	0	0	0	0	0	0
-1.3962	2.6529	4.7488	0	0	0	0	0	0	0	0	0	0
-1.3958	2.6142	4.6482	0	0	0	0	0	0	0	0	0	0
-1.3954	2.5749	4.5485	0	0	0	0	0	0	0	0	0	0
-1.395	2.5363	4.449	0	0	0	0	0	0	0	0	0	0
-1.3946	2.4983	4.3498	0	0	0	0	0	0	0	0	0	0
-1.3942	2.4611	4.251	0	0	0	0	0	0	0	0	0	0
-1.3938	2.4246	4.1527	0	0	0	0	0	0	0	0	0	0
-1.3934	2.389	4.055	0	0	0	0	0	0	0	0	0	0
-1.393	2.3543	3.958	0	0	0	0	0	0	0	0	0	0
-1.3926	2.3204	3.8618	0	0	0	0	0	0	0	0	0	0
-1.3922	2.2875	3.7666	0	0	0	0	0	0	0	0	0	0
-1.3918	2.2556	3.6724	0	0	0	0	0	0	0	0	0	0
-1.3914	2.2247	3.5794	0	0	0	0	0	0	0	0	0	0
-1.391	2.1949	3.4877	0	0	0	0	0	0	0	0	0	0
-1.3906	2.1662	3.3974	0	0	0	0	0	0	0	0	0	0
-1.3902	2.1386	3.3087	0	0	0	0	0	0	0	0	0	0
-1.3898	2.1122	3.2217	0	0	0	0	0	0	0	0	0	0
-1.3894	2.087	3.1367	0	0	0	0	0	0	0	0	0	0
-1.389	2.063	3.0536	0	0	0	0	0	0	0	0	0	0
-1.3886	2.0403	2.9729	0	0	0	0	0	0	0	0	0	0
-1.3882	2.0189	2.8945	0	0	0	0	0	0	0	0	0	0
-1.3878	1.9989	2.8188	0	0	0	0	0	0	0	0	0	0
-1.3874	1.9788	2.7468	0	0	0	0	0	0	0	0	0	0
-1.387	1.9603	2.6747	0	0	0	0	0	0	0	0	0	0
-1.3866	1.9446	2.6083	0	0	0	0	0	0	0	0	0	0
-1.3862	1.9303	2.5455	0	0	0	0	0	0	0	0	0	0
-1.3858	1.9175	2.4865	0	0	0	0	0	0	0	0	0	0
-1.3854	1.9061	2.4316	0	0	0	0	0	0	0	0	0	0
-1.385	1.8963	2.381	0	0	0	0	0	0	0	0	0	0
-1.3846	1.8879	2.335	0	0	0	0	0	0	0	0	0	0
-1.3842	1.8811	2.2939	0	0	0	0	0	0	0	0	0	0
-1.3838	1.8759	2.2579	0	0	0	0	0	0	0	0	0	0
-1.3834	1.8722	2.2272	0	0	0	0	0	0	0	0	0	0
-1.383	1.8701	2.2021	0	0	0	0	0	0	0	0	0	0
-1.3826	1.8696	2.1827	0	0	0	0	0	0	0	0	0	0
-1.3822	1.8708	2.1692	0	0	0	0	0	0	0	0	0	0
-1.3818	1.8722	2.16	0	0	0	0	0	0	0	0	0	0
-1.3814	1.8767	2.1584	0	0	0	0	0	0	0	0	0	0
-1.381	1.8829	2.1629	0	0	0	0	0	0	0	0	0	0
-1.3806	1.8907	2.1734	0	0	0	0	0	0	0	0	0	0
-1.3802	1.9001	2.1897	0	0	0	0	0	0	0	0	0	0
-1.3798	1.9113	2.2118	0	0	0	0	0	0	0	0	0	0
-1.3794	1.9241	2.2394	0	0	0	0	0	0	0	0	0	0
-1.379	1.9385	2.2723	0	0	0	0	0	0	0	0	0	0
-1.3786	1.9547	2.3104	0	0	0	0	0	0	0	0	0	0
-1.3782	1.9725	2.3532	0	0	0	0	0	0	0	0	0	0
-1.3778	1.9933	2.4014	0	0	0	0	0	0	0	0	0	0
-1.3774	2.0146	2.4531	0	0	0	0	0	0	0	0	0	0
-1.377	2.0376	2.5088	0	0	0	0	0	0	0	0	0	0
-1.3766	2.0622	2.5683	0	0	0	0	0	0	0	0	0	0
-1.3762	2.0885	2.6312	0	0	0	0	0	0	0	0	0	0
-1.3758	2.1165	2.6973	0	0	0	0	0	0	0	0	0	0
-1.3754	2.1461	2.7664	0	0	0	0	0	0	0	0	0	0
-1.375	2.1774	2.8383	0	0	0	0	0	0	0	0	0	0
-1.3746	2.2103	2.9126	0	0	0	0	0	0	0	0	0	0
-1.3742	2.2449	2.9891	0	0	0	0	0	0	0	0	0	0
-1.3738	2.281	3.0678	0	0	0	0	0	0	0	0	0	0
-1.3734	2.3188	3.1484	0	0	0	0	0	0	0	0	0	0
-1.373	2.3582	3.2306	0	0	0	0	0	0	0	0	0	0
-1.3726	2.3991	3.3144	0	0	0	0	0	0	0	0	0	0
-1.3722	2.4417	3.3995	0	0	0	0	0	0	0	0	0	0
-1.3718	2.4857	3.4859	0	0	0	0	0	0	0	0	0	0
-1.3714	2.5313	3.5733	0	0	0	0	0	0	0	0	0	0
-1.3711	2.5785	3.6617	0	0	0	0	0	0	0	0	0	0
-1.3707	2.6271	3.7509	0	0	0	0	0	0	0	0	0	0
-1.3703	2.6772	3.8407	0	0	0	0	0	0	0	0	0	0
-1.3699	2.7287	3.9312	0	0	0	0	0	0	0	0	0	0
-1.3695	2.7817	4.022	0	0	0	0	0	0	0	0	0	0
-1.3691	2.8361	4.1132	0	0	0	0	0	0	0	0	0	0
-1.3687	2.8919	4.2046	0	0	0	0	0	0	0	0	0	0
-1.3683	2.9491	4.2961	0	0	0	0	0	0	0	0	0	0
-1.3679	3.0076	4.3876	0	0	0	0	0	0	0	0	0	0
-1.3675	3.0674	4.479	0	0	0	0	0	0	0	0	0	0
-1.3671	3.1285	4.5702	0	0	0	0	0	0	0	0	0	0
-1.3667	3.1909	4.6611	0	0	0	0	0	0	0	0	0	0
-1.3663	3.2546	4.7516	0	0	0	0	0	0	0	0	0	0
-1.3659	3.3195	4.8416	0	0	0	0	0	0	0	0	0	0
-1.3655	3.3855	4.931	0	0	0	0	0	0	0	0	0	0
-1.3651	3.4528	5.0198	0	0	0	0	0	0	0	0	0	0
-1.3647	3.5212	5.1078	0	0	0	0	0	0	0	0	0	0
-1.3643	3.5907	5.1949	0	0	0	0	0	0	0	0	0	0
-1.3639	3.6613	5.2811	0	0	0	0	0	0	0	0	0	0
-1.3635	3.7329	5.3662	0	0	0	0	0	0	0	0	0	0
-1.3631	3.8056	5.4503	0	0	0	0	0	0	0	0	0	0
-1.3627	3.8793	5.5331	0	0	0	0	0	0	0	0	0	0
-1.3623	3.9539	5.6146	0	0	0	0	0	0	0	0	0	0
-1.3619	4.0295	5.6947	0	0	0	0	0	0	0	0	0	0
-1.3615	4.1061	5.7734	0	0	0	0	0	0	0	0	0	0
-1.3611	4.1835	5.8506	0	0	0	0	0	0	0	0	0	0
-1.3607	4.2618	5.9261	0	0	0	0	0	0	0	0	0	0
-1.3603	4.3409	6	0	0	0	0	0	0	0	0	0	0
-1.3599	4.4208	6.0721	0	0	0	0	0	0	0	0	0	0
-1.3595	4.5014	6.1424	0	0	0	0	0	0	0	0	0	0
-1.3591	4.5829	6.2107	0	0	0	0	0	0	0	0	0	0
-1.3587	4.665	6.2771	0	0	0	0	0	0	0	0	0	0
-1.3583	4.7478	6.3415	0	0	0	0	0	0	0	0	0	0
-1.3579	4.8313	6.4038	0	0	0	0	0	0	0	0	0	0
-1.3575	4.9154	6.4639	0	0	0	0	0	0	0	0	0	0
-1.3571	5.0001	6.5219	0	0	0	0	0	0	0	0	0	0
-1.3567	5.0854	6.5775	0	0	0	0	0	0	0	0	0	0
-1.3563	5.1712	6.6309	0	0	0	0	0	0	0	0	0	0
-1.3559	5.2576	6.682	0	0	0	0	0	0	0	0	0	0
-1.3555	5.3444	6.7307	0	0	0	0	0	0	0	0	0	0
-1.3551	5.4317	6.777	0	0	0	0	0	0	0	0	0	0
-1.3547	5.5194	6.8208	0	0	0	0	0	0	0	0	0	0
-1.3543	5.6076	6.8622	0	0	0	0	0	0	0	0	0	0
-1.3539	5.6961	6.9011	0	0	0	0	0	0	0	0	0	0
-1.3535	5.7849	6.9375	0	0	0	0	0	0	0	0	0	0
-1.3531	5.8741	6.9713	0	0	0	0	0	0	0	0	0	0
-1.3527	5.9636	7.0027	0	0	0	0	0	0	0	0	0	0
-1.3523	6.0534	7.0316	0	0	0	0	0	0	0	0	0	0
-1.3519	6.1433	7.0579	0	0	0	0	0	0	0	0	0	0
-1.3515	6.2336	7.0818	0	0	0	0	0	0	0	0	0	0
-1.3511	6.324	7.1032	0	0	0	0	0	0	0	0	0	0
-1.3507	6.4146	7.1221	0	0	0	0	0	0	0	0	0	0
-1.3503	6.5053	7.1387	0	0	0	0	0	0	0	0	0	0
-1.3499	6.5961	7.1528	0	0	0	0	0	0	0	0	0	0
-1.3495	6.687	7.1646	0	0	0	0	0	0	0	0	0	0
-1.3491	6.778	7.1741	0	0	0	0	0	0	0	0	0	0
-1.3487	6.869	7.1813	0	0	0	0	0	0	0	0	0	0
-1.3483	6.9601	7.1864	0	0	0	0	0	0	0	0	0	0
-1.3479	7.0511	7.1894	0	0	0	0	0	0	0	0	0	0
-1.3475	7.1421	7.1903	0	0	0	0	0	0	0	0	0	0
-1.3471	7.233	7.1893	0	0	0	0	0	0	1	0	0	0
-1.3467	7.3238	7.1864	0	0	0	0	0	0	0	0	0	0
-1.3463	7.4146	7.1817	0	0	0	0	0	0	0	0	0	0
-1.3459	7.5051	7.1753	0	0	0	0	0	0	0	0	0	0
-1.3455	7.5956	7.1673	0	0	0	0	0	0	0	0	0	0
-1.3451	7.6858	7.1578	0	0	0	0	0	0	0	0	0	0
-1.3447	7.7758	7.147	0	0	0	0	0	0	0	0	0	0
-1.3443	7.8655	7.1349	0	0	0	0	0	0	0	0	0	0
-1.344	7.955	7.1217	0	0	0	0	0	0	0	0	0	0
-1.3436	8.0442	7.1075	0	0	0	0	0	0	0	0	0	0
-1.3432	8.133	7.0924	0	0	0	0	0	0	0	0	0	0
-1.3428	8.2215	7.0765	0	0	0	0	0	0	0	0	0	0
-1.3424	8.3097	7.06	0	0	0	0	0	0	0	0	0	0
-1.342	8.3974	7.0431	0	0	0	0	0	0	0	0	0	0
-1.3416	8.4846	7.0258	0	0	0	0	0	0	0	0	0	0
-1.3412	8.5714	7.0083	0	0	0	0	0	0	0	0	0	0
-1.3408	8.6577	6.9907	0	0	0	0	0	0	0	0	0	0
-1.3404	8.7435	6.9732	0	0	0	0	0	0	0	0	0	0
-1.34	8.8288	6.9559	0	0	0	0	0	0	0	0	0	0
-1.3396	8.9134	6.9389	0	0	0	0	0	0	0	0	0	0
-1.3392	8.9974	6.9225	0	0	0	0	0	0	0	0	0	0
-1.3388	9.0808	6.9066	0	0	0	0	0	0	0	0	0	0
-1.3384	9.1635	6.8914	0	0	0	0	0	0	0	0	0	0
-1.338	9.2455	6.8771	0	0	0	0	0	0	0	0	0	0
-1.3376	9.3267	6.8638	0	0	0	0	0	0	0	0	0	0
-1.3372	9.4071	6.8515	0	0	0	0	0	0	0	0	0	0
-1.3368	9.4868	6.8404	0	0	0	0	0	0	0	0	0	0
-1.3364	9.5656	6.8306	0	0	0	0	0	0	0	0	0	0
-1.336	9.6422	6.8233	0	0	0	0	0	0	0	0	0	0
-1.3356	9.7193	6.8162	0	0	0	0	0	0	0	0	0	0
-1.3352	9.7954	6.8105	0	0	0	0	0	0	0	0	0	0
-1.3348	9.8706	6.8064	0	0	0	0	0	0	0	0	0	0
-1.3344	9.9447	6.804	0	0	0	0	0	0	0	0	0	0
-1.334	10.018	6.8031	0	0	0	0	0	0	0	0	0	0
-1.3336	10.09	6.8039	0	0	0	0	0	0	0	0	0	0
-1.3332	10.16	6.8065	0	0	0	0	0	0	0	0	0	0
-1.3328	10.23	6.8106	0	0	0	0	0	0	0	0	0	0
-1.3324	10.299	6.8165	0	0	0	0	0	0	0	0	0	0
-1.332	10.366	6.8241	0	0	0	0	0	0	0	0	0	0
-1.3316	10.432	6.8332	0	0	0	0	0	0	0	0	0	0
-1.3312	10.496	6.844	0	0	0	0	0	0	0	0	0	0
-1.3308	10.559	6.8564	0	0	0	0	0	0	0	0	0	0
-1.3304	10.621	6.8702	0	0	0	0	0	0	0	0	0	0
-1.33	10.681	6.8855	0	0	0	0	0	0	0	0	0	0
-1.3296	10.74	6.9022	0	0	0	0	0	0	0	0	0	0
-1.3292	10.797	6.9201	0	0	0	0	0	0	0	0	0	0
-1.3288	10.853	6.9393	0	0	0	0	0	0	0	0	0	0
-1.3284	10.907	6.9596	0	0	0	0	0	0	0	0	0	0
-1.328	10.96	6.981	0	0	0	0	0	0	0	0	0	0
-1.3276	11.011	7.0033	0	0	0	0	0	0	0	0	0	0
-1.3272	11.06	7.0264	0	0	0	0	0	0	0	0	0	0
-1.3268	11.107	7.0504	0	0	0	0	0	0	0	0	0	0
-1.3264	11.153	7.0749	0	0	0	0	0	0	0	0	0	0
-1.326	11.196	7.1	0	0	0	0	0	0	0	0	0	0
-1.3256	11.238	7.1256	0	0	0	0	0	0	0	0	0	0
-1.3252	11.278	7.1515	0	0	0	0	0	0	0	0	0	0
-1.3248	11.316	7.1777	0	0	0	0	0	0	0	0	0	0
-1.3244	11.352	7.204	0	0	0	0	0	0	0	0	0	0
-1.324	11.386	7.2304	0	0	0	0	0	0	0	0	0	0
-1.3236	11.418	7.2568	0	0	0	0	0	0	0	0	0	0
-1.3232	11.448	7.283	0	0	0	0	0	0	0	0	0	0
-1.3228	11.476	7.3091	0	0	0	0	0	0	0	0	0	0
-1.3224	11.502	7.3348	0	0	0	0	0	0	0	0	0	0
-1.322	11.525	7.3603	0	0	0	0	1	0	0	0	0	0
-1.3216	11.547	7.3853	0	0	0	0	0	0	0	0	0	0
-1.3212	11.566	7.4098	0	0	0	0	0	0	0	0	0	0
-1.3208	11.583	7.4337	0	0	0	0	0	0	0	0	0	0
-1.3204	11.597	7.4571	0	0	0	0	0	0	0	0	0	0
-1.32	11.61	7.4798	0	0	0	0	0	0	0	0	0	0
-1.3196	11.62	7.5018	0	0	0	0	0	0	0	0	0	0
-1.3192	11.628	7.5231	0	0	0	0	0	0	0	0	0	0
-1.3188	11.633	7.5436	0	0	0	0	0	0	0	0	0	0
-1.3184	11.636	7.5633	0	0	0	0	0	0	0	0	0	0
-1.318	11.636	7.5821	0	0	0	0	0	0	0	0	0	0
-1.3176	11.635	7.6002	0	0	0	0	0	0	0	0	0	0
-1.3172	11.63	7.6173	0	0	0	0	0	0	0	0	0	0
-1.3168	11.624	7.6337	0	0	0	0	0	0	0	0	0	0
-1.3165	11.615	7.6491	0	0	0	0	0	0	0	0	0	0
-1.3161	11.603	7.6636	0	0	1	0	0	0	0	0	0	0
-1.3157	11.589	7.6773	0	0	0	0	0	0	0	0	0	0
-1.3153	11.573	7.6902	0	0	0	0	0	0	0	0	0	0
-1.3149	11.554	7.7021	0	0	0	0	0	0	0	0	0	0
-1.3145	11.533	7.7132	0	0	0	0	0	0	0	0	0	0
-1.3141	11.509	7.7235	0	0	0	0	0	0	0	0	0	0
-1.3137	11.483	7.7329	0	0	0	0	0	0	0	0	0	0
-1.3133	11.454	7.7415	0	0	0	0	0	0	0	0	0	0
-1.3129	11.423	7.7493	0	0	0	0	0	0	0	0	0	0
-1.3125	11.389	7.7564	0	0	0	0	0	0	0	0	0	0
-1.3121	11.353	7.7627	0	0	0	0	0	0	0	0	0	0
-1.3117	11.315	7.7682	0	0	0	0	0	0	0	0	0	0
-1.3113	11.274	7.7731	0	0	0	0	0	0	0	0	0	0
-1.3109	11.231	7.7772	0	0	0	0	0	0	0	0	0	0
-1.3105	11.186	7.7806	0	0	0	0	0	0	0	0	0	0
-1.3101	11.138	7.7834	0	0	0	0	0	0	0	0	0	0
-1.3097	11.087	7.7855	0	0	0	0	0	0	0	0	0	0
-1.3093	11.035	7.787	0	0	0	0	0	0	0	0	0	0
-1.3089	10.98	7.7878	0	0	0	0	0	0	0	0	0	0
-1.3085	10.923	7.788	0	0	0	0	0	0	0	0	0	0
-1.3081	10.864	7.7876	0	0	0	0	0	0	0	0	0	0
-1.3077	10.802	7.7866	0	0	0	0	0	0	0	0	0	0
-1.3073	10.74	7.7835	0	0	0	0	0	0	0	0	0	0
-1.3069	10.674	7.7811	0	0	0	0	0	0	0	0	0	0
-1.3065	10.607	7.7781	0	0	0	0	0	0	0	0	0	0
-1.3061	10.537	7.7745	0	0	0	0	0	0	0	0	0	0
-1.3057	10.465	7.7702	0	0	0	0	0	0	0	0	0	0
-1.3053	10.391	7.7652	0	0	0	0	0	0	0	0	0	0
-1.3049	10.315	7.7595	0	0	0	0	0	0	0	0	0	0
-1.3045	10.238	7.7532	0	0	0	0	0	0	0	0	0	0
-1.3041	10.16	7.7472	0	0	0	0	0	0	0	0	0	0
-1.3037	10.078	7.7395	0	0	0	0	0	0	0	0	0	0
-1.3033	9.9954	7.7309	0	0	0	0	0	0	0	0	0	0
-1.3029	9.9108	7.7216	0	0	0	0	0	0	0	0	0	0
-1.3025	9.8245	7.7114	0	0	0	0	0	0	0	0	0	0
-1.3021	9.7365	7.7003	0	0	0	0	0	0	0	0	0	0
-1.3017	9.6471	7.6883	0	0	0	0	0	0	0	0	0	0
-1.3013	9.5561	7.6754	0	0	0	0	0	0	0	0	0	0
-1.3009	9.4637	7.6614	0	0	0	0	0	0	0	0	0	0
-1.3005	9.3699	7.6465	0	0	0	0	0	0	0	0	0	0
-1.3001	9.2747	7.6304	0	0	0	0	0	0	0	0	0	0
-1.2997	9.1783	7.6133	0	0	0	0	0	0	0	0	0	0
-1.2993	9.0806	7.595	0	0	0	0	0	0	0	0	0	0
-1.2989	8.9818	7.5755	0	0	0	0	0	0	0	0	0	0
-1.2985	8.8818	7.5547	0	0	0	0	0	0	0	0	0	0
-1.2981	8.7809	7.5326	0	0	0	0	0	0	0	0	0	0
-1.2977	8.6789	7.5092	0	0	0	0	0	1	0	0	0	0
-1.2973	8.576	7.4845	0	0	0	0	0	0	0	0	0	0
-1.2969	8.4722	7.4583	0	0	0	0	0	0	0	0	0	0
-1.2965	8.3677	7.4307	0	0	0	0	0	0	0	0	0	0
-1.2961	8.2623	7.4016	0	0	0	0	0	0	0	0	0	0
-1.2957	8.1563	7.3709	0	0	0	0	0	0	0	0	0	0
-1.2953	8.0497	7.3387	0	0	0	0	0	0	0	0	0	0
-1.2949	7.9426	7.3049	0	0	0	0	0	0	0	0	0	0
-1.2945	7.8349	7.2695	0	0	0	0	0	0	0	0	0	0
-1.2941	7.7268	7.2325	0	0	0	0	0	0	0	0	0	0
-1.2937	7.6183	7.1938	0	0	0	0	0	0	0	0	0	0
-1.2933	7.5096	7.1534	0	0	0	0	0	0	0	0	0	0
-1.2929	7.4006	7.1112	0	0	0	0	0	0	0	0	0	0
-1.2925	7.2914	7.0674	0	0	0	0	0	0	0	0	0	0
-1.2921	7.1821	7.0219	0	0	0	0	0	0	0	0	0	0
-1.2917	7.0728	6.9745	0	0	0	0	0	0	0	0	0	0
-1.2913	6.9634	6.9255	0	0	0	0	0	0	0	0	0	0
-1.2909	6.8542	6.8747	0	0	0	0	0	0	0	0	0	0
-1.2905	6.7451	6.8222	0	0	0	0	0	0	0	0	0	0
-1.2901	6.6361	6.7679	0	0	0	0	0	0	0	0	0	0
-1.2897	6.5275	6.7118	0	0	0	0	0	0	0	0	0	0
-1.2893	6.4192	6.6541	0	0	0	0	0	0	0	0	0	0
-1.289	6.3112	6.5946	0	0	0	0	0	0	0	0	0	0
-1.2886	6.2037	6.5335	0	0	0	0	0	0	0	0	0	0
-1.2882	6.0967	6.4707	0	0	0	0	0	0	0	0	0	0
-1.2878	5.9903	6.4062	0	0	0	0	0	0	0	0	0	0
-1.2874	5.8845	6.3401	0	0	0	0	0	0	0	0	0	0
-1.287	5.7794	6.2725	0.0023212	0.0032827	0	0	0	0	0	0	0	0
-1.2866	5.675	6.2032	0.0025128	0.0035537	0	0	0	0	0	0	0	0
-1.2862	5.5714	6.1325	0.0027192	0.0038455	0	0	0	0	0	0	0	0
-1.2858	5.4687	6.0602	0.0029413	0.0041596	0	0	0	0	0	0	0	0
-1.2854	5.3669	5.9865	0.0031803	0.0044976	0	0	0	0	0	0	0	0
-1.285	5.2661	5.9114	0.0034373	0.0048611	0	0	0	0	0	0	0	0
-1.2846	5.1662	5.835	0.0037136	0.0052519	0	0	0	0	0	0	0	0
-1.2842	5.0675	5.7572	0.0040106	0.0056718	0	0	0	0	0	0	0	0
-1.2838	4.9699	5.6782	0.0043296	0.006123	0	0	0	0	0	0	0	0
-1.2834	4.8735	5.5979	0.0046721	0.0066073	0	0	0	0	0	0	0	0
-1.283	4.7783	5.5165	0.0050397	0.0071272	0	0	0	0	0	0	0	0
-1.2826	4.6844	5.434	0.0054341	0.0076849	0	0	0	0	0	0	0	0
-1.2822	4.5918	5.3505	0.005857	0.008283	0	0	0	0	0	0	0	0
-1.2818	4.5007	5.266	0.0063103	0.0089241	0	0	0	0	0	0	0	0
-1.2814	4.4109	5.1806	0.006796	0.0096109	0	0	0	0	0	0	0	0
-1.281	4.3227	5.0943	0.0073161	0.010347	0	0	0	0	0	0	0	0
-1.2806	4.2359	5.0072	0.007873	0.011134	0	0	0	0	0	0	0	0
-1.2802	4.1508	4.9193	0.0084688	0.011977	0	0	0	0	0	0	0	0
-1.2798	4.0673	4.8308	0.0091062	0.012878	0	0	0	0	0	0	0	0
-1.2794	3.9854	4.7417	0.0097876	0.013842	0	0	0	0	0	0	0	0
-1.279	3.9052	4.6521	0.010516	0.014872	0	0	0	0	0	0	0	0
-1.2786	3.8268	4.562	0.011294	0.015972	0	0	0	0	0	0	0	0
-1.2782	3.7502	4.4715	0.012125	0.017147	0	0	0	0	0	0	0	0
-1.2778	3.6754	4.3807	0.013011	0.018401	0	0	0	0	0	0	0	0
-1.2774	3.6025	4.2897	0.013957	0.019738	0	0	0	0	0	0	0	0
-1.277	3.5315	4.1985	0.014966	0.021165	0	0	0	0	0	0	0	0
-1.2766	3.4624	4.1072	0.016041	0.022685	0	0	0	0	0	0	0	0
-1.2762	3.3954	4.0159	0.017187	0.024306	0	0	0	0	0	0	0	0
-1.2758	3.3303	3.9247	0.018407	0.026031	0	0	0	0	0	0	0	0
-1.2754	3.2673	3.8337	0.019706	0.027868	0	0	0	0	0	0	0	0
-1.275	3.2064	3.7429	0.021088	0.029823	0	0	0	0	0	0	0	0
-1.2746	3.1476	3.6525	0.022559	0.031903	0	0	0	0	0	0	0	0
-1.2742	3.0909	3.5625	0.024122	0.034113	0	0	0	0	0	0	0	0
-1.2738	3.0364	3.4731	0.025783	0.036463	0	0	0	0	0	0	0	0
-1.2734	2.9842	3.3843	0.027548	0.038959	0	0	0	0	0	0	0	0
-1.273	2.9341	3.2963	0.029422	0.041609	0	0	0	0	0	0	0	0
-1.2726	2.8864	3.2093	0.031411	0.044422	0	0	0	0	0	0	0	0
-1.2722	2.8409	3.1232	0.033521	0.047406	0	0	0	0	0	0	0	0
-1.2718	2.7977	3.0383	0.035759	0.05057	0	0	0	0	0	0	0	0
-1.2714	2.7569	2.9548	0.03813	0.053925	0	0	0	0	0	0	0	0
-1.271	2.7184	2.8727	0.040644	0.057479	0	0	0	0	0	0	0	0
-1.2706	2.6823	2.7923	0.043305	0.061242	0	0	0	0	0	0	0	0
-1.2702	2.6486	2.7138	0.046122	0.065227	0	0	0	0	0	0	0	0
-1.2698	2.6173	2.6373	0.049104	0.069443	0	0	0	0	0	0	0	0
-1.2694	2.5884	2.5631	0.052257	0.073902	0	0	0	0	0	0	0	0
-1.269	2.562	2.4914	0.05559	0.078617	0	0	0	0	0	0	0	0
-1.2686	2.5381	2.4225	0.059113	0.083598	0	0	0	0	0	0	0	0
-1.2682	2.5166	2.3567	0.062834	0.088861	0	0	0	0	0	0	0	0
-1.2678	2.4976	2.2943	0.066763	0.094417	0	0	0	0	0	0	0	0
-1.2674	2.4812	2.2356	0.070909	0.10028	0	0	0	0	0	0	0	0
-1.267	2.4659	2.1807	0.075283	0.10647	0	0	0	0	0	0	0	0
-1.2666	2.4546	2.1303	0.079895	0.11299	0	0	0	0	0	0	0	0
-1.2662	2.4458	2.0847	0.084755	0.11986	0	0	0	0	0	0	0	0
-1.2658	2.4395	2.0442	0.089876	0.1271	0	0	0	0	0	0	0	0
-1.2654	2.4357	2.0092	0.095268	0.13473	0	0	0	0	0	0	0	0
-1.265	2.4345	1.98	0.10094	0.14276	0	0	0	0	0	0	0	0
-1.2646	2.4357	1.957	0.10692	0.1512	0	0	0	0	0	0	0	0
-1.2642	2.4396	1.9403	0.1132	0.16008	0	0	0	0	0	0	0	0
-1.2638	2.4459	1.9302	0.1198	0.16942	0	0	0	0	0	0	0	0
-1.2634	2.4548	1.927	0.12673	0.17923	0	0	0	0	0	0	0	0
-1.263	2.4662	1.9306	0.13402	0.18953	0	0	0	0	0	0	0	0
-1.2626	2.4801	1.9411	0.14166	0.20034	0	0	0	0	0	0	0	0
-1.2622	2.4965	1.9586	0.14968	0.21169	0	0	0	0	0	0	0	0
-1.2618	2.5154	1.9828	0.1581	0.22359	0	0	0	0	0	0	0	0
-1.2615	2.5368	2.0136	0.16692	0.23606	0	0	0	0	0	0	0	0
-1.2611	2.5607	2.0508	0.17616	0.24913	0	0	0	0	0	0	0	0
-1.2607	2.587	2.0942	0.18585	0.26282	0	0	0	0	0	0	0	0
-1.2603	2.6158	2.1434	0.19598	0.27716	0	0	0	0	0	0	0	0
-1.2599	2.6469	2.1981	0.20659	0.29216	0	0	0	0	0	0	0	0
-1.2595	2.6805	2.258	0.21768	0.30785	0	0	0	0	0	0	0	0
-1.2591	2.7165	2.3229	0.22928	0.32425	0	0	0	0	0	0	0	0
-1.2587	2.7547	2.3923	0.2414	0.34139	0	0	0	0	0	0	0	0
-1.2583	2.7953	2.466	0.25406	0.3593	0	0	0	0	0	0	0	0
-1.2579	2.8382	2.5437	0.26728	0.37799	0	0	0	0	0	0	0	0
-1.2575	2.8834	2.6251	0.28108	0.3975	0	0	0	0	0	0	0	0
-1.2571	2.9308	2.7099	0.29547	0.41785	0	0	0	0	0	0	0	0
-1.2567	2.9803	2.7979	0.31047	0.43907	0	0	0	0	0	0	0	0
-1.2563	3.032	2.889	0.3261	0.46118	0	0	0	0	0	0	0	0
-1.2559	3.0859	2.9827	0.34239	0.48421	0	0	0	0	0	0	0	0
-1.2555	3.1418	3.0791	0.35935	0.50819	0	0	0	0	0	0	0	0
-1.2551	3.1997	3.1779	0.37699	0.53315	0	0	0	0	0	0	0	0
-1.2547	3.2596	3.2789	0.39535	0.55911	0	0	0	0	0	0	0	0
-1.2543	3.3214	3.382	0.41444	0.5861	0	0	0	0	0	0	0	0
-1.2539	3.3852	3.487	0.43427	0.61415	0	0	0	0	0	0	0	0
-1.2535	3.4507	3.5939	0.45488	0.64329	0	0	0	0	0	0	0	0
-1.2531	3.518	3.7024	0.47627	0.67354	0	0	0	0	0	0	0	0
-1.2527	3.5871	3.8125	0.49847	0.70494	0	0	0	0	0	0	0	0
-1.2523	3.6578	3.924	0.5215	0.73751	0	0	0	0	0	0	0	0
-1.2519	3.7301	4.0368	0.54537	0.77127	0	0	0	0	0	0	0	0
-1.2515	3.804	4.1509	0.57011	0.80626	0	0	0	0	0	0	0	0
-1.2511	3.8793	4.2661	0.59574	0.8425	0	0	0	0	0	0	0	0
-1.2507	3.956	4.3824	0.62227	0.88003	0	0	0	0	0	0	0	0
-1.2503	4.0341	4.4996	0.64973	0.91885	0	0	0	0	0	0	0	0
-1.2499	4.1134	4.6176	0.67813	0.95901	0	0	0	0	0	0	0	0
-1.2495	4.194	4.7364	0.70748	1.0005	0	0	0	0	0	0	0	0
-1.2491	4.2756	4.8558	0.73782	1.0434	0	0	0	0	0	0	0	0
-1.2487	4.3583	4.9759	0.76915	1.0877	0	0	0	0	0	0	0	0
-1.2483	4.442	5.0964	0.80149	1.1335	0	0	0	0	0	0	0	0
-1.2479	4.5265	5.2173	0.83487	1.1807	0	0	0	0	0	0	0	0
-1.2475	4.6119	5.3385	0.86928	1.2294	0	0	0	0	0	0	0	0
-1.2471	4.698	5.4599	0.90476	1.2795	0	0	0	0	0	0	0	0
-1.2467	4.7847	5.5814	0.94131	1.3312	0	0	0	0	0	0	0	0
-1.2463	4.8719	5.7029	0.97894	1.3844	0	0	0	0	0	0	0	0
-1.2459	4.9597	5.8244	1.0177	1.4392	0	0	0	0	0	0	0	0
-1.2455	5.0478	5.9457	1.0575	1.4956	0	0	0	0	0	0	0	0
-1.2451	5.1362	6.0668	1.0985	1.5535	0	0	0	0	0	0	0	0
-1.2447	5.2247	6.1875	1.1406	1.6131	0	0	0	0	0	0	0	0
-1.2443	5.3134	6.3078	1.1839	1.6742	0	0	0	0	0	0	0	0
-1.2439	5.4036	6.4295	1.2283	1.737	0	0	0	0	0	0	0	0
-1.2435	5.4923	6.5487	1.2738	1.8015	0	0	0	0	0	0	0	0
-1.2431	5.5809	6.6672	1.3206	1.8676	0	0	0	0	0	0	0	0
-1.2427	5.6692	6.7849	1.3685	1.9353	0	0	0	0	0	0	0	0
-1.2423	5.7558	6.9028	1.4176	2.0047	0	0	0	0	0	0	0	0
-1.2419	5.8434	7.0185	1.4678	2.0758	0	0	0	0	0	0	0	0
-1.2415	5.9304	7.1331	1.5192	2.1485	0	0	0	0	0	0	0	0
-1.2411	6.0168	7.2464	1.5718	2.2229	0	0	0	0	0	0	0	0
-1.2407	6.1025	7.3585	1.6256	2.299	0	0	0	0	0	0	0	0
-1.2403	6.1873	7.4691	1.6806	2.3767	0	0	0	0	0	0	0	0
-1.2399	6.2712	7.5783	1.7367	2.4561	0	0	0	0	0	0	0	0
-1.2395	6.3541	7.6858	1.794	2.5371	0	0	0	0	0	0	0	0
-1.2391	6.4358	7.7916	1.8525	2.6198	0	0	0	0	0	0	0	0
-1.2387	6.5164	7.8956	1.912	2.704	0	0	0	0	0	0	0	0
-1.2383	6.5956	7.9977	1.9728	2.7899	0	0	0	0	0	0	0	0
-1.2379	6.6735	8.0978	2.0346	2.8774	0	0	0	0	0	0	0	0
-1.2375	6.7498	8.1958	2.0976	2.9664	0	0	0	0	0	0	0	0
-1.2371	6.8246	8.2917	2.1616	3.0569	0	0	0	0	0	0	0	0
-1.2367	6.8978	8.3852	2.2267	3.149	0	0	0	0	0	0	0	0
-1.2363	6.9692	8.4764	2.2929	3.2426	0	0	0	0	0	0	0	0
-1.2359	7.0375	8.5637	2.36	3.3376	0	0	0	0	0	0	0	0
-1.2355	7.1053	8.65	2.4282	3.434	0	0	0	0	0	0	0	0
-1.2351	7.1711	8.7336	2.4974	3.5318	0	0	0	0	0	0	0	0
-1.2347	7.2348	8.8146	2.5675	3.631	0	0	0	0	0	0	0	0
-1.2344	7.2964	8.8927	2.6385	3.7315	0	0	0	0	0	0	0	0
-1.234	7.3558	8.968	2.7105	3.8332	0	0	0	0	0	0	0	0
-1.2336	7.4129	9.0403	2.7833	3.9361	0	0	0	0	0	0	0	0
-1.2332	7.4677	9.1096	2.8569	4.0402	0	0	0	0	0	0	0	0
-1.2328	7.52	9.1758	2.9312	4.1454	0	0	0	0	0	0	0	0
-1.2324	7.5699	9.2388	3.0064	4.2517	0	0	0	0	0	0	0	0
-1.232	7.6172	9.2986	3.0822	4.3589	0	0	0	0	0	0	0	0
-1.2316	7.662	9.3552	3.1587	4.4671	0	0	0	0	0	0	0	0
-1.2312	7.7041	9.4084	3.2358	4.5761	0	0	0	0	0	0	0	0
-1.2308	7.7435	9.4582	3.3135	4.6859	0	0	0	0	0	0	0	0
-1.2304	7.7802	9.5045	3.3916	4.7965	0	0	0	0	0	0	0	0
-1.23	7.8141	9.5474	3.4703	4.9077	0	0	0	0	0	0	0	0
-1.2296	7.8452	9.5868	3.5493	5.0195	0	0	0	0	0	0	0	0
-1.2292	7.8734	9.6226	3.6288	5.1319	0	0	0	0	0	0	0	0
-1.2288	7.8988	9.6548	3.7085	5.2446	0	0	0	0	0	0	0	0
-1.2284	7.9213	9.6834	3.7885	5.3577	0	0	0	0	0	0	0	0
-1.228	7.9408	9.7083	3.8686	5.4711	0	0	0	0	0	0	0	0
-1.2276	7.9574	9.7296	3.9489	5.5846	0	0	0	0	0	0	0	0
-1.2272	7.971	9.7472	4.0293	5.6983	0	0	0	0	1	0	0	0
-1.2268	7.9816	9.7611	4.1096	5.8119	0	0	0	0	0	0	0	0
-1.2264	7.9892	9.7713	4.1899	5.9255	0	0	0	0	0	0	0	0
-1.226	7.9938	9.7778	4.2701	6.0388	0	0	0	0	0	0	0	0
-1.2256	7.9955	9.7806	4.3501	6.152	0	0	0	0	0	0	0	0
-1.2252	7.9941	9.7797	4.4298	6.2647	0	0	0	0	0	0	0	0
-1.2248	7.9898	9.7752	4.5092	6.377	0	0	0	0	0	0	0	0
-1.2244	7.9825	9.7669	4.5882	6.4887	0	0	0	0	0	0	0	0
-1.224	7.9723	9.7551	4.6667	6.5997	1	0	0	0	0	0	0	0
-1.2236	7.9591	9.7396	4.7447	6.71	0	0	0	0	0	0	0	0
-1.2232	7.943	9.7206	4.822	6.8194	0	0	0	0	0	0	0	0
-1.2228	7.924	9.6979	4.8987	6.9278	0	0	0	0	0	0	0	0
-1.2224	7.9022	9.6718	4.9746	7.0352	0	0	0	0	0	0	0	0
-1.222	7.8789	9.6439	5.0497	7.1414	0	0	0	0	0	0	0	0
-1.2216	7.8516	9.6111	5.1239	7.2463	0	0	0	0	0	0	0	0
-1.2212	7.8216	9.5748	5.1971	7.3499	0	0	0	0	0	0	0	0
-1.2208	7.7889	9.5353	5.2693	7.4519	0	0	0	0	0	0	0	0
-1.2204	7.7536	9.4926	5.3404	7.5524	0	0	0	0	0	0	0	0
-1.22	7.7156	9.4466	5.4102	7.6512	0	0	0	0	0	0	0	0
-1.2196	7.6752	9.3976	5.4788	7.7482	0	0	0	0	0	0	0	0
-1.2192	7.6323	9.3455	5.5461	7.8433	0	0	0	0	0	0	0	0
-1.2188	7.587	9.2905	5.6119	7.9365	0	0	0	0	0	0	0	0
-1.2184	7.5394	9.2326	5.6763	8.0276	0	0	0	0	0	0	0	0
-1.218	7.4896	9.1719	5.7392	8.1164	0	0	0	0	0	0	0	0
-1.2176	7.4362	9.1096	5.8004	8.203	0	0	0	0	0	0	0	0
-1.2172	7.3822	9.0435	5.86	8.2873	0	0	0	0	0	0	0	0
-1.2168	7.3261	8.9749	5.9178	8.3691	0	0	0	0	0	0	0	0
-1.2164	7.2681	8.9039	5.9739	8.4483	0	0	0	0	0	0	0	0
-1.216	7.2081	8.8306	6.028	8.5249	0	0	0	0	0	0	0	0
-1.2156	7.1464	8.755	6.0803	8.5988	0	0	0	0	0	0	0	0
-1.2152	7.0844	8.6791	6.1305	8.6699	0	0	0	0	0	0	0	0
-1.2148	7.0195	8.5996	6.1787	8.7381	0	0	0	0	0	0	0	0
-1.2144	6.9545	8.5199	6.2249	8.8033	0	0	0	0	0	0	0	0
-1.214	6.8867	8.4369	6.2688	8.8655	0	0	0	0	0	0	0	0
-1.2136	6.8177	8.3523	6.3106	8.9246	0	0	0	0	0	0	0	0
-1.2132	6.7474	8.2662	6.3502	8.9805	0	0	0	0	0	0	0	0
-1.2128	6.6775	8.1775	6.3874	9.0332	0	0	0	0	0	0	0	0
-1.2124	6.6052	8.0886	6.4223	9.0826	0	0	0	0	0	0	0	0
-1.212	6.532	7.9985	6.4549	9.1286	0	0	0	0	0	0	0	0
-1.2116	6.458	7.9074	6.485	9.1712	0	0	0	0	0	0	0	0
-1.2112	6.3833	7.8154	6.5127	9.2104	0	0	0	0	0	0	0	0
-1.2108	6.308	7.7226	6.5379	9.246	0	0	0	0	0	0	0	0
-1.2104	6.2322	7.6292	6.5606	9.2781	0	0	0	0	0	0	0	0
-1.21	6.1559	7.5353	6.5808	9.3067	0	0	0	0	0	0	0	0
-1.2096	6.0794	7.441	6.5984	9.3316	0	0	0	0	0	0	0	0
-1.2092	6.0027	7.3464	6.6134	9.3528	0	0	0	0	0	0	0	0
-1.2088	5.9259	7.2518	6.6259	9.3704	0	0	0	0	0	0	0	0
-1.2084	5.8506	7.156	6.6357	9.3843	0	0	0	0	0	0	0	0
-1.208	5.774	7.0615	6.6429	9.3945	0	0	0	0	0	0	0	0
-1.2076	5.6977	6.9672	6.6475	9.4009	0	0	0	0	0	0	0	0
-1.2072	5.6217	6.8734	6.6494	9.4037	0	0	0	0	0	0	0	0
-1.2069	5.5462	6.7802	6.6487	9.4026	0	0	0	0	0	0	0	1
-1.2065	5.4712	6.6878	6.6453	9.3979	0	0	0	0	0	0	0	0
-1.2061	5.3968	6.5962	6.6393	9.3894	0	0	0	0	0	0	0	0
-1.2057	5.3231	6.5056	6.6307	9.3773	0	0	0	0	0	0	0	0
-1.2053	5.2503	6.4162	6.6195	9.3614	0	0	0	0	0	0	0	0
-1.2049	5.1784	6.3281	6.6056	9.3418	0	0	0	0	0	0	0	0
-1.2045	5.1075	6.2415	6.5892	9.3186	0	0	0	0	0	0	0	0
-1.2041	5.0378	6.1564	6.5702	9.2917	0	0	0	0	0	0	0	0
-1.2037	4.9692	6.0732	6.5487	9.2612	0	0	0	0	0	0	0	0
-1.2033	4.9019	5.9918	6.5246	9.2272	0	0	0	0	0	0	0	0
[truncated: 4,148 more rows]
