# Supplementary material for: Biophysics of object segmentation in a collision-detecting neuron
Source: eLife. 2018 Apr 18;7:e34238. doi: 10.7554/eLife.34238 (PMC5947989; doi:10.7554/eLife.34238)
Supplement: Figure 3—source data 2. [file elife-34238-fig3-data2.xlsx]

## Sheet: Fig3S1B
70.44	64
62.893	44
76.73	80

## Sheet: Fig3S1C
57.6	62.5	125.23	125.6
95.75	88	165.71	180.53
85	96	178.34	176.82
81.8	95.5	187.41	241.76
82	86	174.2	195.69
89.6	85	195.09	164.64
