# Supplementary material for: Biophysics of object segmentation in a collision-detecting neuron
Source: eLife. 2018 Apr 18;7:e34238. doi: 10.7554/eLife.34238 (PMC5947989; doi:10.7554/eLife.34238)
Supplement: Figure 4—source data 1. [file elife-34238-fig4-data1.xlsx]

## Sheet: Fig4A
-66	-67
-68	-68
-66	-71
-66	-68.5
-66	-71
-65	-71
-69	-67.5
-64.5	-78
-65	-75
-67	-70
-64.5	-70
-63	-68
-63	-69
-68	-70
-68	-69
-64	NaN
-65.5	NaN
-65	NaN
-63	NaN
-64	NaN
-65	NaN
-64	NaN
-66	NaN
-65	NaN
-65	NaN
-65	NaN
-63	NaN
-66	NaN
-66	NaN
-66	NaN
-66	NaN
-65	NaN
-65	NaN
-66	NaN
-65	NaN
-63	NaN
-66	NaN
-66	NaN
-67	NaN
-61	NaN
-64	NaN
-60	NaN
-63	NaN
-65	NaN
-64.5	NaN
-65	NaN
-65	NaN
-65	NaN
-65	NaN
-65	NaN
-66	NaN
-67	NaN
-65	NaN
-64	NaN
-62	NaN
-65.5	NaN
-65	NaN
-65	NaN
-60	NaN
-66	NaN
-60	NaN
-64	NaN
-65.5	NaN
-66	NaN
-61	NaN
-64	NaN
-66	NaN
-64	NaN
-65	NaN
-63	NaN
-64	NaN
-64	NaN
-65	NaN
-66	NaN
-65	NaN
-63	NaN
-65	NaN
-65	NaN
-63	NaN
-66	NaN
-68	NaN
-64.5	NaN

## Sheet: Fig4B
4.6286	3.1416
5.6527	14.399
3.4598	4.0743
4.3287	5.7067
3.3765	11.437
5.2224	11.473
3.9047	6.3456
4.1293	6.8256
4.4046	6.9888
4.5136	8.5991
3.9093	6.58
4.2813	4.1494
3.984	8.7499
3.5387	8.056
3.5999	5.7923
4.0509	8.024
6.1266	3.4665
6.079	NaN
3.3825	NaN
3.6326	NaN
3.2494	NaN
3.7879	NaN
6.768	NaN
4.1974	NaN
5.1874	NaN
2.2332	NaN
2.3386	NaN
3.8215	NaN
6.0359	NaN
2.1052	NaN
2.5604	NaN
2.1839	NaN
5.2151	NaN
3.5485	NaN
2.2905	NaN
4.1327	NaN
2.4496	NaN
2.618	NaN
3.9775	NaN
2.9968	NaN
4.1054	NaN
2.7068	NaN
3.4871	NaN
3.0139	NaN
3.2352	NaN
3.3044	NaN
2.6282	NaN
5.2074	NaN
4.3441	NaN
3.0504	NaN
7.7407	NaN
2.5847	NaN
2.6374	NaN
3.149	NaN
3.1768	NaN
3.2003	NaN
3.8824	NaN
4.2821	NaN
3.1532	NaN
2.6926	NaN
2.498	NaN
3.2272	NaN
3.2611	NaN
3.0604	NaN
2.2968	NaN
3.746	NaN
3.7618	NaN
2.3828	NaN
2.9386	NaN
4.2361	NaN
2.6641	NaN
2.7425	NaN
3.4898	NaN
2.9187	NaN
3.1595	NaN
3.0025	NaN
3.2329	NaN
3.8445	NaN

## Sheet: Fig4C
8.2094	7.742
6.3705	8.0512
8.1658	8.6724
6.3349	11.479
6.6989	12.405
6.7849	8.5494
6.3666	10.128
7.6339	10.443
8.2346	9.0325
5.5351	10.667
7.4082	13.186
6.6128	9.3613
4.6991	7.7247
8.1124	8.0293
7.1966	9.4545
7.5315	10.11
8.0164	NaN
8.7804	NaN
5.697	NaN
5.8039	NaN
6.9646	NaN
5.2844	NaN
7.8987	NaN
7.8172	NaN
6.7016	NaN
6.1456	NaN
8.048	NaN
7.8181	NaN
7.3524	NaN
6.126	NaN
5.4017	NaN
6.8273	NaN
6.4428	NaN
6.718	NaN
7.4693	NaN
7.1594	NaN
6.6878	NaN
6.4168	NaN
8.4858	NaN
6.3498	NaN
6.9491	NaN
6.3722	NaN
6.0553	NaN
5.9285	NaN
5.9602	NaN
6.7208	NaN
6.1739	NaN
6.3794	NaN
7.3127	NaN
8.2731	NaN
5.5212	NaN
8.7896	NaN
8.6008	NaN
7.1102	NaN
6.7704	NaN
7.639	NaN
8.9018	NaN
6.1619	NaN
5.5332	NaN
5.7804	NaN
4.6428	NaN
5.0686	NaN
6.4505	NaN
5.7638	NaN
7.248	NaN
6.3622	NaN
5.7435	NaN
5.1628	NaN
6.0287	NaN
4.964	NaN
4.4872	NaN
6.8657	NaN
8.0597	NaN
7.1351	NaN
6.6932	NaN
7.0425	NaN
5.2168	NaN
6.6411	NaN
7.9903	NaN
7.6382	NaN
7.11	NaN
6.6933	NaN

## Sheet: Fig4E
0.005	68.034	0.01	76.837	0.005	146.18	0.005	209.46	0.005	142.46	209.6
0.01	31.071	0.015	31.223	0.01	52.828	0.01	104.47	0.006	117.87	180.73
0.01	50.292	0.005	153.15	0.015	21.41	0.015	54.686	0.007	97.745	156.39
0.005	143.91	0.015	94.124	0.02	15.081	0.02	40.414	0.008	81.265	135.87
0.015	21.41	0.005	220.69	NaN	NaN	NaN	NaN	0.009	67.771	118.57
0.01	39.691	0.015	38.755	NaN	NaN	NaN	NaN	0.01	56.722	103.99
0.02	23.773	0.015	54.642	NaN	NaN	NaN	NaN	0.011	47.675	91.693
0.01	37.747	0.01	87.479	NaN	NaN	NaN	NaN	0.012	40.268	81.329
0.005	161.56	0.005	126.87	NaN	NaN	NaN	NaN	0.013	34.203	72.591
0.01	54.24	0.02	42.015	NaN	NaN	NaN	NaN	0.014	29.237	65.225
0.005	173.85	0.01	64.046	NaN	NaN	NaN	NaN	0.015	25.171	59.015
0.01	73.764	0.005	82.768	NaN	NaN	NaN	NaN	0.016	21.842	53.779
0.02	6.7045	0.005	102.49	NaN	NaN	NaN	NaN	0.017	19.116	49.366
0.02	15.177	0.01	53.887	NaN	NaN	NaN	NaN	0.018	16.884	45.645
0.02	10.598	0.02	13.846	NaN	NaN	NaN	NaN	0.019	15.056	42.508
0.01	30.628	0.02	6.704	NaN	NaN	NaN	NaN	0.02	13.56	39.864
0.005	109.14	0.01	35.193	NaN	NaN	NaN	NaN	NaN	NaN	NaN
0.01	35.834	0.01	38.375	NaN	NaN	NaN	NaN	NaN	NaN	NaN
0.005	119.52	0.02	27.704	NaN	NaN	NaN	NaN	NaN	NaN	NaN
0.01	50.548	0.005	NaN	NaN	NaN	NaN	NaN	NaN	NaN	NaN
0.02	6.2433	0.02	60.907	NaN	NaN	NaN	NaN	NaN	NaN	NaN
0.02	9.9083	0.01	146.82	NaN	NaN	NaN	NaN	NaN	NaN	NaN
0.02	33.444	0.005	291.45	NaN	NaN	NaN	NaN	NaN	NaN	NaN
0.01	70.383	0.02	NaN	NaN	NaN	NaN	NaN	NaN	NaN	NaN
0.005	187.75	0.01	224.09	NaN	NaN	NaN	NaN	NaN	NaN	NaN
0.02	28.048	0.005	282.57	NaN	NaN	NaN	NaN	NaN	NaN	NaN
0.005	176.36	0.005	335.4	NaN	NaN	NaN	NaN	NaN	NaN	NaN
0.01	81.136	0.01	185.88	NaN	NaN	NaN	NaN	NaN	NaN	NaN
0.02	22.876	0.02	56.193	NaN	NaN	NaN	NaN	NaN	NaN	NaN
0.01	57.071	0.02	37.596	NaN	NaN	NaN	NaN	NaN	NaN	NaN
0.005	157.79	0.01	143.18	NaN	NaN	NaN	NaN	NaN	NaN	NaN
0.02	34.58	0.01	144.81	NaN	NaN	NaN	NaN	NaN	NaN	NaN
0.005	180.81	0.02	108.04	NaN	NaN	NaN	NaN	NaN	NaN	NaN
0.01	82.037	0.005	324.06	NaN	NaN	NaN	NaN	NaN	NaN	NaN
0.02	13.768	0.02	58.431	NaN	NaN	NaN	NaN	NaN	NaN	NaN
0.01	46.434	0.01	138.46	NaN	NaN	NaN	NaN	NaN	NaN	NaN
0.02	8.9441	0.005	248.46	NaN	NaN	NaN	NaN	NaN	NaN	NaN
0.01	44.617	0.01	38.897	NaN	NaN	NaN	NaN	NaN	NaN	NaN
0.02	18.575	0.02	11.891	NaN	NaN	NaN	NaN	NaN	NaN	NaN
0.01	52.803	0.01	148.5	NaN	NaN	NaN	NaN	NaN	NaN	NaN
0.02	11.852	0.02	66.313	NaN	NaN	NaN	NaN	NaN	NaN	NaN
0.01	58.078	0.01	158.35	NaN	NaN	NaN	NaN	NaN	NaN	NaN
0.01	28.075	0.02	48.733	NaN	NaN	NaN	NaN	NaN	NaN	NaN
0.01	22.233	0.01	33.776	NaN	NaN	NaN	NaN	NaN	NaN	NaN
0.02	10.071	0.02	13.957	NaN	NaN	NaN	NaN	NaN	NaN	NaN
0.01	38.119	0.01	56.669	NaN	NaN	NaN	NaN	NaN	NaN	NaN
0.02	4.3866	0.005	144.15	NaN	NaN	NaN	NaN	NaN	NaN	NaN
0.02	5.2417	0.02	20.203	NaN	NaN	NaN	NaN	NaN	NaN	NaN
0.005	100.09	0.02	45.407	NaN	NaN	NaN	NaN	NaN	NaN	NaN
0.005	90.281	0.01	124.28	NaN	NaN	NaN	NaN	NaN	NaN	NaN
0.01	45.43	0.01	81.311	NaN	NaN	NaN	NaN	NaN	NaN	NaN
0.01	37.574	0.005	201.45	NaN	NaN	NaN	NaN	NaN	NaN	NaN
0.02	18.029	0.02	27.071	NaN	NaN	NaN	NaN	NaN	NaN	NaN
0.01	68.465	0.02	42.019	NaN	NaN	NaN	NaN	NaN	NaN	NaN
0.02	13.919	0.01	108.59	NaN	NaN	NaN	NaN	NaN	NaN	NaN
0.02	5.358	NaN	NaN	NaN	NaN	NaN	NaN	NaN	NaN	NaN
0.005	156.23	NaN	NaN	NaN	NaN	NaN	NaN	NaN	NaN	NaN
0.005	154.03	NaN	NaN	NaN	NaN	NaN	NaN	NaN	NaN	NaN
0.005	181.89	NaN	NaN	NaN	NaN	NaN	NaN	NaN	NaN	NaN
0.02	16.943	NaN	NaN	NaN	NaN	NaN	NaN	NaN	NaN	NaN
0.01	67.261	NaN	NaN	NaN	NaN	NaN	NaN	NaN	NaN	NaN
0.005	180.55	NaN	NaN	NaN	NaN	NaN	NaN	NaN	NaN	NaN
0.01	70.858	NaN	NaN	NaN	NaN	NaN	NaN	NaN	NaN	NaN
0.02	20.241	NaN	NaN	NaN	NaN	NaN	NaN	NaN	NaN	NaN
0.005	188.7	NaN	NaN	NaN	NaN	NaN	NaN	NaN	NaN	NaN
0.02	14.778	NaN	NaN	NaN	NaN	NaN	NaN	NaN	NaN	NaN
0.01	69.743	NaN	NaN	NaN	NaN	NaN	NaN	NaN	NaN	NaN
0.005	137.09	NaN	NaN	NaN	NaN	NaN	NaN	NaN	NaN	NaN
0.01	55.478	NaN	NaN	NaN	NaN	NaN	NaN	NaN	NaN	NaN
0.02	13.269	NaN	NaN	NaN	NaN	NaN	NaN	NaN	NaN	NaN
0.01	46.081	NaN	NaN	NaN	NaN	NaN	NaN	NaN	NaN	NaN
0.005	122.25	NaN	NaN	NaN	NaN	NaN	NaN	NaN	NaN	NaN
0.02	8.0264	NaN	NaN	NaN	NaN	NaN	NaN	NaN	NaN	NaN
0.02	16.908	NaN	NaN	NaN	NaN	NaN	NaN	NaN	NaN	NaN
0.005	136.47	NaN	NaN	NaN	NaN	NaN	NaN	NaN	NaN	NaN
0.01	67.571	NaN	NaN	NaN	NaN	NaN	NaN	NaN	NaN	NaN
0.01	61.64	NaN	NaN	NaN	NaN	NaN	NaN	NaN	NaN	NaN
0.005	159	NaN	NaN	NaN	NaN	NaN	NaN	NaN	NaN	NaN
0.02	13.781	NaN	NaN	NaN	NaN	NaN	NaN	NaN	NaN	NaN
0.02	16.823	NaN	NaN	NaN	NaN	NaN	NaN	NaN	NaN	NaN
0.005	130.6	NaN	NaN	NaN	NaN	NaN	NaN	NaN	NaN	NaN
0.01	62.779	NaN	NaN	NaN	NaN	NaN	NaN	NaN	NaN	NaN

## Sheet: Fig4F
7.8908	7.4823	7.5005	13.539
6.867	7.082	4.6491	8.9425
5.4813	7.7044	6.2065	11.783
5.6259	10.102	6.6545	13.536
5.2862	10.117	7.1739	10.569
6.2858	12.308	6.6378	9.958
5.7216	11.63	NaN	NaN
4.2632	11.105	NaN	NaN
5.5288	10.259	NaN	NaN
4.7326	22.274	NaN	NaN
4.7042	19.22	NaN	NaN
5.8666	12.321	NaN	NaN
4.2984	15.689	NaN	NaN
4.8513	16.629	NaN	NaN
7.7093	13.492	NaN	NaN
5.3088	11.649	NaN	NaN
7.4149	11.878	NaN	NaN
5.3033	12.88	NaN	NaN
5.3728	18.64	NaN	NaN
7.6241	11.621	NaN	NaN
5.2684	8.3278	NaN	NaN
5.4166	7.7297	NaN	NaN
6.465	7.1943	NaN	NaN
6.2674	15.343	NaN	NaN
6.2963	12.148	NaN	NaN
6.5083	6.5505	NaN	NaN
6.2657	9.0009	NaN	NaN
5.9955	9.9907	NaN	NaN
7.0693	7.6037	NaN	NaN
6.8845	6.436	NaN	NaN
6.9995	6.7241	NaN	NaN
6.4467	7.0337	NaN	NaN
6.175	11.85	NaN	NaN
5.9163	6.7968	NaN	NaN
6.1376	9.313	NaN	NaN
6.0466	8.5031	NaN	NaN
7.2515	7.9019	NaN	NaN
7.0745	14.014	NaN	NaN
5.5152	14.192	NaN	NaN
5.39	9.4956	NaN	NaN
5.7087	9.432	NaN	NaN
5.6987	8.818	NaN	NaN
6.5975	8.7568	NaN	NaN
8.1397	18.456	NaN	NaN
8.3002	18.114	NaN	NaN
8.1446	10.49	NaN	NaN
6.5229	9.801	NaN	NaN
7.7382	10.137	NaN	NaN
7.8797	11.749	NaN	NaN
6.6813	10.668	NaN	NaN
4.3655	9.2272	NaN	NaN
3.9417	8.5914	NaN	NaN
5.6092	8.9437	NaN	NaN
5.4625	12.063	NaN	NaN
4.3837	10.964	NaN	NaN
3.8534	NaN	NaN	NaN
5.27	NaN	NaN	NaN
4.3067	NaN	NaN	NaN
6.3479	NaN	NaN	NaN
6.3791	NaN	NaN	NaN
6.1638	NaN	NaN	NaN
6.1619	NaN	NaN	NaN
6.0823	NaN	NaN	NaN
6.1041	NaN	NaN	NaN
6.2701	NaN	NaN	NaN
6.3399	NaN	NaN	NaN
6.1095	NaN	NaN	NaN
7.3047	NaN	NaN	NaN
7.0599	NaN	NaN	NaN
6.843	NaN	NaN	NaN
7.099	NaN	NaN	NaN
6.9116	NaN	NaN	NaN
7.1803	NaN	NaN	NaN
7.6045	NaN	NaN	NaN
6.6694	NaN	NaN	NaN
7.5783	NaN	NaN	NaN
6.1924	NaN	NaN	NaN
5.9657	NaN	NaN	NaN
6.2168	NaN	NaN	NaN
7.4487	NaN	NaN	NaN
6.5483	NaN	NaN	NaN
7.455	NaN	NaN	NaN
