# Supplementary material for: Biophysics of object segmentation in a collision-detecting neuron
Source: eLife. 2018 Apr 18;7:e34238. doi: 10.7554/eLife.34238 (PMC5947989; doi:10.7554/eLife.34238)
Supplement: Figure 5—source data 1. [file elife-34238-fig5-data1.xlsx]

## Sheet: Fig5A
-2.6	2.2034	-64.753	-60.338	0.016862	0	0.45275	3.9149
-2.5998	2.2036	-64.75	-60.271	0.016451	0	0.45757	3.9007
-2.5996	2.2037	-64.872	-60.466	0.016052	0	0.46239	3.8863
-2.5994	2.2039	-64.86	-60.39	0.015664	0	0.46722	3.8719
-2.5992	2.2041	-64.915	-60.295	0.015288	0	0.47205	3.8573
-2.599	2.2043	-64.768	-60.372	0.014923	0	0.47688	3.8427
-2.5988	2.2044	-64.753	-60.298	0.014569	0	0.48172	3.8279
-2.5986	2.2046	-64.606	-60.268	0.014226	0	0.48655	3.813
-2.5984	2.2048	-64.518	-60.204	0.013893	0	0.49138	3.7981
-2.5982	2.2049	-64.622	-60.125	0.013571	0	0.49622	3.783
-2.598	2.2051	-64.57	-60.366	0.01326	0	0.50105	3.7679
-2.5978	2.2053	-64.399	-60.347	0.012959	0	0.50588	3.7527
-2.5976	2.2054	-64.582	-60.53	0.012668	0	0.5107	3.7373
-2.5974	2.2056	-64.646	-60.454	0.012386	0	0.51552	3.722
-2.5972	2.2058	-64.716	-60.347	0.012115	0	0.52033	3.7065
-2.597	2.2059	-64.683	-60.585	0.011854	0	0.52514	3.6909
-2.5968	2.2061	-64.487	-60.515	0.011602	0	0.52993	3.6753
-2.5966	2.2063	-64.515	-60.695	0.011359	0	0.53472	3.6596
-2.5964	2.2065	-64.457	-60.506	0.011126	0	0.5395	3.6439
-2.5962	2.2066	-64.286	-60.741	0.010902	0	0.54426	3.628
-2.596	2.2068	-64.075	-60.649	0.010687	0	0.54902	3.6048
-2.5958	2.207	-63.959	-60.573	0.010481	0	0.55376	3.5891
-2.5956	2.2071	-63.898	-60.707	0.010285	0	0.55848	3.5733
-2.5954	2.2073	-63.721	-60.61	0.010096	0	0.56319	3.5574
-2.5952	2.2075	-63.74	-60.829	0.0099171	0	0.56789	3.5415
-2.595	2.2076	-63.758	-60.637	0.0097464	0	0.57256	3.5255
-2.5948	2.2078	-63.865	-60.714	0.0095842	0	0.57722	3.5095
-2.5946	2.208	-63.822	-60.735	0.0094304	0	0.58186	3.4934
-2.5944	2.2081	-63.764	-60.961	0.009285	0	0.58647	3.4773
-2.5942	2.2083	-63.853	-61.006	0.009148	0	0.59107	3.4611
-2.594	2.2085	-64.005	-60.866	0.0090191	0	0.59564	3.4449
-2.5938	2.2087	-63.911	-60.906	0.0088984	0	0.60018	3.4287
-2.5936	2.2088	-63.911	-60.915	0.0087859	0	0.6047	3.4124
-2.5934	2.209	-63.904	-60.939	0.0086813	0	0.6092	3.3961
-2.5932	2.2092	-64.008	-60.994	0.0085848	0	0.61367	3.3798
-2.593	2.2093	-63.88	-61.049	0.0084961	0	0.6181	3.3634
-2.5928	2.2095	-63.917	-60.881	0.0084154	0	0.62251	3.347
-2.5926	2.2097	-63.862	-60.805	0.0083425	0	0.62689	3.3306
-2.5924	2.2098	-64.081	-60.759	0.0082775	0	0.63124	3.3142
-2.5922	2.21	-64.167	-60.71	0.0082202	0	0.63555	3.2978
-2.592	2.2102	-64.24	-60.662	0.0081706	0	0.63983	3.2813
-2.5918	2.2104	-64.188	-60.594	0.0081287	0	0.64407	3.2648
-2.5916	2.2105	-64.219	-60.482	0.0080946	0	0.64828	3.2484
-2.5914	2.2107	-64.335	-60.384	0.0080681	0	0.65245	3.2319
-2.5912	2.2109	-64.414	-60.503	0.0080493	0	0.65658	3.2154
-2.591	2.211	-64.402	-60.494	0.0080381	0	0.66068	3.1989
-2.5908	2.2112	-64.338	-60.39	0.0080346	0	0.66473	3.1825
-2.5906	2.2114	-64.063	-60.244	0.0080388	0	0.66874	3.166
-2.5904	2.2115	-64.011	-60.292	0.0080505	0	0.67271	3.1495
-2.5902	2.2117	-63.941	-60.234	0.00807	0	0.67663	3.1331
-2.59	2.2119	-64.017	-60.1	0.008097	0	0.68051	3.1166
-2.5898	2.2121	-63.981	-60.201	0.0081318	0	0.68435	3.1002
-2.5896	2.2122	-63.642	-60.201	0.0081743	0	0.68813	3.0838
-2.5894	2.2124	-63.758	-60.125	0.0082245	0	0.69187	3.0674
-2.5892	2.2126	-63.862	-60.002	0.0082824	0	0.69556	3.0511
-2.589	2.2127	-63.828	-59.844	0.0083481	0	0.69921	3.0348
-2.5888	2.2129	-63.712	-59.755	0.0084216	0	0.7028	3.0185
-2.5886	2.2131	-63.7	-60.125	0.0085029	0	0.70633	3.0022
-2.5884	2.2132	-63.645	-60.048	0.0085922	0	0.70982	2.986
-2.5882	2.2134	-63.7	-60.28	0.0086894	0	0.71325	2.9698
-2.588	2.2136	-63.755	-60.219	0.0087946	0	0.71663	2.9536
-2.5878	2.2138	-63.593	-59.975	0.0089078	0	0.71995	2.9375
-2.5876	2.2139	-63.792	-60.03	0.0090291	0	0.72322	2.9214
-2.5874	2.2141	-63.779	-59.938	0.0091586	0	0.72643	2.9054
-2.5872	2.2143	-63.813	-59.911	0.0092964	0	0.72958	2.8894
-2.587	2.2144	-63.505	-60.149	0.0094424	0	0.73267	2.8735
-2.5868	2.2146	-63.538	-60.17	0.0095968	0	0.7357	2.8576
-2.5866	2.2148	-63.438	-60.182	0.0097597	0	0.73867	2.8418
-2.5864	2.215	-63.352	-60.253	0.0099311	0	0.74158	2.826
-2.5863	2.2151	-63.544	-60.408	0.010111	0	0.74443	2.8103
-2.5861	2.2153	-63.318	-60.271	0.0103	0	0.74721	2.7946
-2.5859	2.2155	-63.508	-60.121	0.010498	0	0.74993	2.7791
-2.5857	2.2156	-63.486	-60.274	0.010704	0	0.75259	2.7635
-2.5855	2.2158	-63.492	-60.356	0.01092	0	0.75518	2.7481
-2.5853	2.216	-63.553	-60.134	0.011144	0	0.7577	2.7327
-2.5851	2.2161	-63.489	-60.1	0.011378	0	0.76016	2.7174
-2.5849	2.2163	-63.615	-60.027	0.011621	0	0.76254	2.7022
-2.5847	2.2165	-63.657	-60.137	0.011874	0	0.76486	2.687
-2.5845	2.2167	-63.654	-60.17	0.012137	0	0.76711	2.6719
-2.5843	2.2168	-63.718	-60.128	0.012409	0	0.76929	2.6569
-2.5841	2.217	-63.715	-60.036	0.01269	0	0.7714	2.642
-2.5839	2.2172	-63.517	-60.186	0.012982	0	0.77344	2.6271
-2.5837	2.2173	-63.483	-60.179	0.013284	0	0.77541	2.6124
-2.5835	2.2175	-63.642	-60.372	0.013597	0	0.77731	2.5977
-2.5833	2.2177	-63.66	-60.457	0.013919	0	0.77913	2.5831
-2.5831	2.2179	-63.706	-60.421	0.014253	0	0.78088	2.5687
-2.5829	2.218	-63.709	-60.332	0.014597	0	0.78256	2.5543
-2.5827	2.2182	-63.602	-60.198	0.014952	0	0.78416	2.5399
-2.5825	2.2184	-63.837	-60.347	0.015318	0	0.78568	2.5257
-2.5823	2.2185	-63.672	-60.469	0.015695	0	0.78714	2.5116
-2.5821	2.2187	-63.566	-60.167	0.016083	0	0.78851	2.4976
-2.5819	2.2189	-63.621	-60.213	0.016483	0	0.78981	2.4837
-2.5817	2.2191	-63.773	-60.28	0.016895	0	0.79104	2.4699
-2.5815	2.2192	-63.737	-60.311	0.017319	0	0.79218	2.4562
-2.5813	2.2194	-63.706	-60.479	0.017754	0	0.79325	2.4425
-2.5811	2.2196	-63.438	-60.445	0.018202	0	0.79425	2.4364
-2.5809	2.2197	-63.346	-60.408	0.018663	0	0.79516	2.4233
-2.5807	2.2199	-63.178	-60.115	0.019136	0	0.796	2.4102
-2.5805	2.2201	-63.077	-60.112	0.019622	0	0.79676	2.3973
-2.5803	2.2203	-62.964	-60.106	0.020121	0	0.79744	2.3919
-2.5801	2.2204	-62.891	-60.161	0.020633	0	0.79804	2.3795
-2.5799	2.2206	-62.849	-60.302	0.021159	0	0.79856	2.3671
-2.5797	2.2208	-62.897	-60.161	0.021699	0	0.799	2.3549
-2.5795	2.2209	-62.812	-60.149	0.022252	0	0.79937	2.3427
-2.5793	2.2211	-62.812	-60.262	0.022819	0	0.79965	2.3308
-2.5791	2.2213	-62.882	-60.198	0.023401	0	0.79986	2.3189
-2.5789	2.2215	-63.083	-60.408	0.023998	0	0.79999	2.3072
-2.5787	2.2216	-63.154	-60.231	0.024609	0	0.80003	2.2956
-2.5785	2.2218	-63.175	-60.366	0.025235	0	0.8	2.2842
-2.5783	2.222	-63.178	-60.421	0.025876	0	0.79989	2.2728
-2.5781	2.2221	-63.236	-60.576	0.026533	0	0.7997	2.2617
-2.5779	2.2223	-63.19	-60.491	0.027206	0	0.79943	2.2506
-2.5777	2.2225	-63.364	-60.463	0.027894	0	0.79908	2.2397
-2.5775	2.2227	-63.328	-60.482	0.028599	0	0.79865	2.229
-2.5773	2.2228	-63.367	-60.375	0.02932	0	0.79814	2.2183
-2.5771	2.223	-63.248	-60.25	0.030058	0	0.79756	2.2078
-2.5769	2.2232	-63.315	-60.161	0.030813	0	0.79689	2.1975
-2.5767	2.2233	-63.132	-60.073	0.031585	0	0.79615	2.1873
-2.5765	2.2235	-63.071	-59.908	0.032374	0	0.79533	2.1773
-2.5763	2.2237	-63.123	-60.027	0.033182	0	0.79443	2.1673
-2.5761	2.2239	-63.166	-59.731	0.034007	0	0.79345	2.1576
-2.5759	2.224	-63.166	-59.67	0.034583	0	0.79239	2.148
-2.5757	2.2242	-63.23	-59.597	0.035456	0	0.79126	2.1385
-2.5755	2.2244	-63.08	-59.777	0.036347	0	0.79005	2.1367
-2.5753	2.2245	-63.099	-59.761	0.037256	0	0.78877	2.1277
-2.5751	2.2247	-63.026	-59.813	0.038185	0	0.7874	2.1189
-2.5749	2.2249	-62.934	-60.085	0.039132	0	0.78597	2.1103
-2.5747	2.2251	-63.047	-59.868	0.0401	0	0.78445	2.1018
-2.5745	2.2252	-63.074	-59.966	0.041087	0	0.78287	2.0935
-2.5743	2.2254	-63.141	-59.78	0.042094	0	0.7812	2.0853
-2.5741	2.2256	-63.215	-59.883	0.043122	0	0.77947	2.0773
-2.5739	2.2258	-63.138	-59.581	0.04417	0	0.77766	2.0695
-2.5737	2.2259	-63.154	-59.31	0.045239	0	0.77578	2.0618
-2.5735	2.2261	-63.212	-59.334	0.04633	0	0.77382	2.0542
-2.5733	2.2263	-63.145	-58.989	0.047442	0	0.7718	2.0533
-2.5731	2.2264	-63.178	-58.828	0.048576	0	0.7697	2.0463
-2.5729	2.2266	-63.389	-58.608	0.049732	0	0.76753	2.0395
-2.5727	2.2268	-63.328	-58.638	0.050911	0	0.7653	2.0328
-2.5725	2.227	-63.407	-58.568	0.052113	0	0.76299	2.0263
-2.5723	2.2271	-63.242	-58.544	0.053337	0	0.76061	2.0199
-2.5721	2.2273	-63.288	-58.593	0.054585	0	0.75817	2.0138
-2.5719	2.2275	-63.434	-58.693	0.055857	0	0.75566	2.0077
-2.5717	2.2277	-63.486	-58.712	0.057152	0	0.75308	2.0019
-2.5715	2.2278	-63.27	-58.901	0.058472	0	0.75044	1.9962
-2.5713	2.228	-63.511	-58.91	0.059816	0	0.74774	1.9907
-2.5711	2.2282	-63.538	-58.98	0.061185	0	0.74496	1.9854
-2.5709	2.2283	-63.48	-59.011	0.062579	0	0.74213	1.9803
-2.5707	2.2285	-63.495	-58.989	0.063999	0	0.73923	1.9753
-2.5705	2.2287	-63.605	-59.182	0.065444	0	0.73627	1.9705
-2.5703	2.2289	-63.639	-59.072	0.066916	0	0.73325	1.9658
-2.5701	2.229	-63.669	-59.087	0.068413	0	0.73017	1.9613
-2.5699	2.2292	-63.557	-59.026	0.069938	0	0.72703	1.957
-2.5697	2.2294	-63.465	-59.066	0.071489	0	0.72383	1.9529
-2.5695	2.2296	-63.541	-59.151	0.073067	0	0.72058	1.949
-2.5693	2.2297	-63.45	-59.044	0.074673	0	0.71727	1.9452
-2.5691	2.2299	-63.605	-59.127	0.076306	0	0.7139	1.9416
-2.5689	2.2301	-63.639	-58.995	0.077967	0	0.71048	1.9381
-2.5687	2.2302	-63.734	-59.084	0.079657	0	0.707	1.9349
-2.5685	2.2304	-63.523	-58.824	0.081375	0	0.70347	1.9244
-2.5683	2.2306	-63.557	-58.913	0.083122	0	0.69989	1.9217
-2.5681	2.2308	-63.447	-59.02	0.084898	0	0.69626	1.9192
-2.5679	2.2309	-63.627	-58.876	0.086703	0	0.69258	1.9168
-2.5677	2.2311	-63.453	-58.904	0.088538	0	0.68885	1.9146
-2.5675	2.2313	-63.416	-59.029	0.090403	0	0.68507	1.9126
-2.5673	2.2315	-63.422	-58.837	0.092298	0	0.68124	1.9107
-2.5671	2.2316	-63.099	-58.864	0.094223	0	0.67737	1.909
-2.5669	2.2318	-62.955	-58.791	0.096179	0	0.67346	1.9002
-2.5667	2.232	-63.044	-58.901	0.098166	0	0.6695	1.899
-2.5665	2.2321	-63.175	-58.989	0.10018	0	0.66549	1.898
-2.5663	2.2323	-63.096	-59.139	0.10223	0	0.66145	1.8972
-2.5661	2.2325	-63.013	-59.102	0.10431	0	0.65736	1.8965
-2.5659	2.2327	-63.038	-59.047	0.10643	0	0.65324	1.896
-2.5657	2.2328	-63.126	-59.236	0.10857	0	0.64908	1.8956
-2.5655	2.233	-63.27	-59.148	0.11075	0	0.64488	1.8954
-2.5653	2.2332	-63.193	-59.111	0.11296	0	0.64064	1.8954
-2.5651	2.2334	-62.943	-59.343	0.1152	0	0.63637	1.8955
-2.5649	2.2335	-62.919	-59.142	0.11747	0	0.63206	1.8958
-2.5647	2.2337	-62.876	-59.444	0.11978	0	0.62772	1.8962
-2.5645	2.2339	-62.94	-59.545	0.12212	0	0.62335	1.8968
-2.5643	2.2341	-63.074	-59.493	0.1245	0	0.61894	1.8902
-2.5641	2.2342	-63.138	-59.722	0.1269	0	0.61451	1.8913
-2.5639	2.2344	-63.145	-59.667	0.12935	0	0.61005	1.8926
-2.5637	2.2346	-63.068	-59.841	0.13182	0	0.60556	1.8867
-2.5635	2.2347	-63.065	-59.771	0.13433	0	0.60104	1.8885
-2.5633	2.2349	-63.196	-59.792	0.13687	0	0.5965	1.8904
-2.5631	2.2351	-63.331	-60.045	0.13945	0	0.59194	1.8925
-2.5629	2.2353	-63.37	-59.987	0.14206	0	0.58735	1.8947
-2.5627	2.2354	-63.331	-60.005	0.14471	0	0.58273	1.8971
-2.5625	2.2356	-63.288	-59.89	0.14739	0	0.5781	1.8996
-2.5623	2.2358	-63.276	-59.999	0.15011	0	0.57345	1.9023
-2.5621	2.236	-63.056	-60.1	0.15286	0	0.56878	1.9051
-2.5619	2.2361	-62.952	-59.938	0.15565	0	0.56409	1.9081
-2.5617	2.2363	-62.772	-60.118	0.15847	0	0.55938	1.9112
-2.5615	2.2365	-62.766	-60.283	0.16133	0	0.55466	1.9144
-2.5613	2.2367	-62.534	-60.21	0.16422	0	0.54992	1.9178
-2.5611	2.2368	-62.385	-60.375	0.16714	0	0.54517	1.9213
-2.5609	2.237	-62.348	-60.112	0.17011	0	0.5404	1.925
-2.5607	2.2372	-62.495	-60.036	0.1731	0	0.53563	1.9288
-2.5605	2.2374	-62.366	-59.89	0.17614	0	0.53084	1.9327
-2.5603	2.2375	-62.339	-59.963	0.17921	0	0.52605	1.9432
-2.5601	2.2377	-62.296	-59.874	0.18231	0	0.52124	1.9476
-2.5599	2.2379	-62.565	-59.951	0.18545	0	0.51643	1.9522
-2.5597	2.2381	-62.635	-60.097	0.18862	0	0.51162	1.9569
-2.5595	2.2382	-62.675	-60.042	0.19183	0	0.50679	1.9617
-2.5593	2.2384	-62.717	-60.125	0.19508	0	0.50197	1.9667
-2.5591	2.2386	-62.693	-60.161	0.19836	0	0.50841	1.9718
-2.5589	2.2388	-62.769	-60.262	0.20167	0	0.50392	1.9771
-2.5588	2.2389	-62.803	-60.305	0.20502	0	0.49944	1.9825
-2.5586	2.2391	-62.821	-60.244	0.20841	0	0.49496	1.988
-2.5584	2.2393	-62.775	-60.384	0.21183	0	0.4905	1.9937
-2.5582	2.2394	-62.916	-60.424	0.21528	0	0.48604	1.9995
-2.558	2.2396	-62.964	-60.588	0.21877	0	0.4816	2.0055
-2.5578	2.2398	-63.022	-60.509	0.22229	0	0.47717	2.0116
-2.5576	2.24	-63.096	-60.506	0.22585	0	0.47276	2.0178
-2.5574	2.2401	-63.114	-60.576	0.22945	0	0.46836	2.0317
-2.5572	2.2403	-63.264	-60.585	0.23307	0	0.46398	2.0384
-2.557	2.2405	-63.221	-60.671	0.23673	0	0.45962	2.0452
-2.5568	2.2407	-63.077	-60.616	0.24043	0	0.45527	2.0522
-2.5566	2.2408	-63.386	-60.894	0.24415	0	0.45095	2.0593
-2.5564	2.241	-63.38	-60.961	0.24791	0	0.44665	2.0666
-2.5562	2.2412	-63.334	-60.897	0.25171	0	0.44237	2.074
-2.556	2.2414	-63.547	-60.869	0.25553	0	0.43811	2.0815
-2.5558	2.2415	-63.648	-60.787	0.25939	0	0.43388	2.0892
-2.5556	2.2417	-63.691	-60.973	0.26328	0	0.42967	2.097
-2.5554	2.2419	-63.758	-60.939	0.2672	0	0.4255	2.1049
-2.5552	2.2421	-63.672	-61.068	0.27116	0	0.42134	2.113
-2.555	2.2422	-63.761	-60.955	0.27514	0	0.41722	2.1211
-2.5548	2.2424	-63.645	-61.089	0.27916	0	0.41313	2.1295
-2.5546	2.2426	-63.535	-61.129	0.2832	0	0.40907	2.1379
-2.5544	2.2428	-63.654	-60.909	0.28728	0	0.40503	2.1465
-2.5542	2.2429	-63.697	-61.159	0.29139	0	0.40104	2.1552
-2.554	2.2431	-63.636	-61.318	0.29552	0	0.39707	2.164
-2.5538	2.2433	-63.654	-61.211	0.29969	0	0.40442	2.1729
-2.5536	2.2435	-63.569	-61.306	0.30388	0	0.40087	2.182
-2.5534	2.2436	-63.575	-61.238	0.3081	0	0.39736	2.1911
-2.5532	2.2438	-63.685	-61.162	0.31235	0	0.3939	2.2004
-2.553	2.244	-63.535	-61.272	0.31663	0	0.39049	2.2099
-2.5528	2.2442	-63.486	-61.202	0.32093	0	0.38712	2.2194
-2.5526	2.2443	-63.752	-61.415	0.32526	0	0.38381	2.229
-2.5524	2.2445	-63.685	-61.235	0.32961	0	0.38055	2.2388
-2.5522	2.2447	-63.831	-61.241	0.33399	0	0.37734	2.2487
-2.552	2.2449	-63.926	-61.336	0.3384	0	0.37418	2.2587
-2.5518	2.245	-63.871	-61.33	0.34282	0	0.37108	2.2687
-2.5516	2.2452	-64.152	-61.412	0.34727	0	0.36804	2.279
-2.5514	2.2454	-64.091	-61.47	0.35175	0	0.36505	2.2893
-2.5512	2.2456	-64.069	-61.321	0.35625	0	0.36212	2.2997
-2.551	2.2457	-64.036	-61.483	0.36076	0	0.35924	2.3102
-2.5508	2.2459	-64.072	-61.446	0.3653	0	0.35643	2.3208
-2.5506	2.2461	-64.234	-61.611	0.36986	0	0.35368	2.3316
-2.5504	2.2463	-64.237	-61.699	0.37444	0	0.35099	2.3424
-2.5502	2.2464	-64.438	-61.681	0.37904	0	0.34836	2.3533
-2.55	2.2466	-64.487	-61.595	0.38366	0	0.3458	2.3644
-2.5498	2.2468	-64.484	-61.495	0.38829	0	0.3433	2.3755
-2.5496	2.247	-64.554	-61.296	0.39295	0	0.34087	2.3867
-2.5494	2.2471	-64.457	-61.455	0.39761	0	0.33851	2.398
-2.5492	2.2473	-64.545	-61.299	0.4023	0	0.33621	2.4094
-2.549	2.2475	-64.432	-61.299	0.407	0	0.33398	2.4209
-2.5488	2.2477	-64.344	-61.266	0.41171	0	0.33182	2.4325
-2.5486	2.2479	-64.167	-61.284	0.41643	0	0.32973	2.4442
-2.5484	2.248	-64.139	-61.324	0.42117	0	0.32772	2.4486
-2.5482	2.2482	-64.091	-61.367	0.42592	0	0.32578	2.4606
-2.548	2.2484	-63.853	-61.495	0.43068	0	0.32391	2.4728
-2.5478	2.2486	-63.981	-61.516	0.43545	0	0.32211	2.485
-2.5476	2.2487	-63.944	-61.507	0.44023	0	0.32039	2.4972
-2.5474	2.2489	-63.95	-61.51	0.44502	0	0.31875	2.5096
-2.5472	2.2491	-64.014	-61.525	0.44982	0	0.31718	2.522
-2.547	2.2493	-64.066	-61.464	0.45462	0	0.31569	2.5345
-2.5468	2.2494	-64.011	-61.324	0.45942	0	0.31428	2.547
-2.5466	2.2496	-63.962	-61.565	0.46424	0	0.31295	2.5597
-2.5464	2.2498	-63.712	-61.592	0.46905	0	0.3117	2.5723
-2.5462	2.25	-63.566	-61.687	0.47387	0	0.31053	2.5851
-2.546	2.2501	-63.676	-61.672	0.47869	0	0.30944	2.5979
-2.5458	2.2503	-63.657	-61.663	0.48351	0	0.30844	2.6108
-2.5456	2.2505	-63.52	-61.547	0.48834	0	0.30752	2.6237
-2.5454	2.2507	-63.523	-61.644	0.49342	0	0.30669	2.6366
-2.5452	2.2508	-63.715	-61.895	0.49825	0	0.30594	2.6571
-2.545	2.251	-63.862	-61.748	0.50308	0	0.30527	2.6704
-2.5448	2.2512	-63.798	-61.766	0.50791	0	0.3047	2.6837
-2.5446	2.2514	-63.761	-61.931	0.51273	0	0.30421	2.6971
-2.5444	2.2515	-63.853	-61.776	0.51754	0	0.30381	2.7106
-2.5442	2.2517	-64.042	-61.931	0.52235	0	0.3035	2.7241
-2.544	2.2519	-63.932	-61.882	0.52715	0	0.30327	2.7376
-2.5438	2.2521	-63.914	-61.916	0.53194	0	0.30314	2.7512
-2.5436	2.2523	-63.767	-61.983	0.53673	0	0.3031	2.7649
-2.5434	2.2524	-63.874	-61.98	0.5415	0	0.30316	2.7786
-2.5432	2.2526	-63.74	-61.751	0.54626	0	0.3033	2.7923
-2.543	2.2528	-63.502	-62.02	0.55101	0	0.30354	2.8061
-2.5428	2.253	-63.141	-62.02	0.55575	0	0.30387	2.8199
-2.5426	2.2531	-63.123	-61.962	0.56047	0	0.3043	2.8337
-2.5424	2.2533	-63.227	-61.898	0.56517	0	0.30483	2.8414
-2.5422	2.2535	-62.983	-61.812	0.56986	0	0.30544	2.8555
-2.542	2.2537	-63.077	-61.818	0.57453	0	0.30616	2.8696
-2.5418	2.2538	-62.943	-61.763	0.57918	0	0.30697	2.8837
-2.5416	2.254	-62.797	-61.721	0.58382	0	0.30788	2.8979
-2.5414	2.2542	-63.068	-61.718	0.58843	0	0.30889	2.9121
-2.5412	2.2544	-63.193	-61.733	0.59302	0	0.31	2.9263
-2.541	2.2545	-63.221	-61.769	0.59758	0	0.31121	2.9405
-2.5408	2.2547	-63.367	-61.718	0.60213	0	0.31252	2.9547
-2.5406	2.2549	-63.373	-61.788	0.60664	0	0.31393	2.9617
-2.5404	2.2551	-63.462	-61.705	0.61114	0	0.31544	2.9761
-2.5402	2.2553	-63.544	-61.885	0.6156	0	0.31705	2.9906
-2.54	2.2554	-63.669	-61.913	0.62004	0	0.31876	3.0051
-2.5398	2.2556	-63.828	-61.711	0.62444	0	0.32058	3.0195
-2.5396	2.2558	-63.901	-61.782	0.62882	0	0.3225	3.034
-2.5394	2.256	-63.685	-61.785	0.63316	0	0.32452	3.0484
-2.5392	2.2561	-63.367	-61.742	0.63747	0	0.32665	3.0629
-2.539	2.2563	-62.937	-61.83	0.64175	0	0.32888	3.0773
-2.5388	2.2565	-62.729	-61.745	0.646	0	0.33122	3.0917
-2.5386	2.2567	-62.647	-61.656	0.65021	0	0.33367	3.1061
-2.5384	2.2568	-62.498	-61.821	0.65438	0	0.33621	3.1205
-2.5382	2.257	-62.72	-61.885	0.65851	0	0.33887	3.1349
-2.538	2.2572	-62.815	-61.885	0.66261	0	0.34163	3.1493
-2.5378	2.2574	-62.794	-61.876	0.66666	0	0.3445	3.1563
-2.5376	2.2576	-62.812	-61.833	0.67068	0	0.34748	3.1708
-2.5374	2.2577	-62.797	-61.977	0.67465	0	0.35056	3.1853
-2.5372	2.2579	-62.903	-61.891	0.67858	0	0.35375	3.1998
-2.537	2.2581	-62.836	-61.867	0.68247	0	0.35705	3.2142
-2.5368	2.2583	-62.815	-61.907	0.68631	0	0.36046	3.2286
-2.5366	2.2584	-62.601	-62.084	0.69011	0	0.36398	3.2504
-2.5364	2.2586	-62.729	-62.001	0.69386	0	0.3676	3.265
-2.5362	2.2588	-62.662	-62.239	0.69756	0	0.37134	3.2795
-2.536	2.259	-62.577	-62.148	0.70121	0	0.37518	3.294
-2.5358	2.2592	-62.617	-62.093	0.70482	0	0.37914	3.3084
-2.5356	2.2593	-62.641	-62.123	0.70837	0	0.3832	3.3228
-2.5354	2.2595	-62.44	-62.044	0.71187	0	0.38738	3.3372
-2.5352	2.2597	-62.153	-61.91	0.71532	0	0.39166	3.3515
-2.535	2.2599	-61.912	-62.148	0.71872	0	0.39606	3.3657
-2.5348	2.26	-62.018	-61.965	0.72207	0	0.40056	3.38
-2.5346	2.2602	-61.881	-61.928	0.72535	0	0.40518	3.3941
-2.5344	2.2604	-61.71	-61.614	0.72859	0	0.40991	3.4083
-2.5342	2.2606	-61.899	-61.425	0.73177	0	0.41474	3.4223
-2.534	2.2608	-61.967	-61.235	0.73489	0	0.41969	3.4363
-2.5338	2.2609	-62.006	-61.238	0.73795	0	0.42475	3.4503
-2.5336	2.2611	-62.113	-61.296	0.74095	0	0.42992	3.4642
-2.5334	2.2613	-61.964	-61.443	0.74389	0	0.4352	3.478
-2.5332	2.2615	-62.003	-61.498	0.74678	0	0.44059	3.4918
-2.533	2.2616	-62.119	-61.522	0.7496	0	0.44609	3.5055
-2.5328	2.2618	-62.156	-61.574	0.75236	0	0.4517	3.5192
-2.5326	2.262	-61.896	-61.379	0.75506	0	0.45742	3.5327
-2.5324	2.2622	-62.003	-61.547	0.7577	0	0.46325	3.5462
-2.5322	2.2624	-62	-61.412	0.76027	0	0.4803	3.5597
-2.532	2.2625	-62.043	-61.214	0.76278	0	0.48668	3.5731
-2.5318	2.2627	-62.015	-61.302	0.76522	0	0.49319	3.5863
-2.5316	2.2629	-61.936	-61.263	0.7676	0	0.49981	3.5996
-2.5315	2.2631	-62.052	-61.29	0.76991	0	0.50655	3.6127
-2.5313	2.2632	-61.79	-61.333	0.77215	0	0.51341	3.6258
-2.5311	2.2634	-61.46	-61.144	0.77433	0	0.52039	3.6387
-2.5309	2.2636	-61.289	-61.183	0.77644	0	0.52749	3.6516
-2.5307	2.2638	-61.222	-60.976	0.77848	0	0.5347	3.6644
-2.5305	2.264	-60.917	-60.964	0.78045	0	0.54204	3.6771
-2.5303	2.2641	-60.935	-60.826	0.78236	0	0.54949	3.6898
-2.5301	2.2643	-61.021	-60.884	0.78419	0	0.55705	3.7023
-2.5299	2.2645	-61.161	-60.976	0.78596	0	0.56474	3.7148
-2.5297	2.2647	-61.387	-60.921	0.78765	0	0.57254	3.7346
-2.5295	2.2648	-61.243	-61.098	0.78928	0	0.58045	3.7471
-2.5293	2.265	-61.277	-61.019	0.79083	0	0.58849	3.7595
-2.5291	2.2652	-61.5	-61.144	0.79231	0	0.59664	3.7718
-2.5289	2.2654	-61.378	-61.068	0.79372	0	0.6049	3.784
-2.5287	2.2656	-61.475	-61.199	0.79506	0	0.61328	3.7961
-2.5285	2.2657	-61.341	-61.223	0.79633	0	0.62178	3.8081
-2.5283	2.2659	-61.292	-61.391	0.79752	0	0.63038	3.8201
-2.5281	2.2661	-61.234	-61.306	0.79864	0	0.63911	3.8319
-2.5279	2.2663	-61.356	-61.174	0.79969	0	0.64794	3.8436
-2.5277	2.2665	-61.234	-60.866	0.80067	0	0.65689	3.8552
-2.5275	2.2666	-61.088	-60.863	0.80157	0	0.66595	3.8667
-2.5273	2.2668	-61.161	-60.881	0.8024	0	0.67513	3.8781
-2.5271	2.267	-61.182	-60.869	0.80316	0	0.68441	3.8894
-2.5269	2.2672	-61.014	-60.866	0.80385	0	0.6938	3.9069
-2.5267	2.2673	-60.834	-61.125	0.80446	0	0.70331	3.9182
-2.5265	2.2675	-60.758	-61.217	0.805	0	0.71292	3.9293
-2.5263	2.2677	-60.679	-60.952	0.80547	0	0.72264	3.9404
-2.5261	2.2679	-60.496	-60.942	0.80586	0	0.73247	3.9513
-2.5259	2.2681	-60.605	-61.052	0.80618	0	0.74241	3.9621
-2.5257	2.2682	-60.636	-61.144	0.80643	0	0.75245	3.9729
-2.5255	2.2684	-60.547	-61.245	0.80661	0	0.7626	3.9835
-2.5253	2.2686	-60.676	-61.287	0.80671	0	0.77285	3.994
-2.5251	2.2688	-60.67	-61.257	0.80675	0	0.7832	4.0043
-2.5249	2.269	-60.703	-61.193	0.80671	0	0.79366	4.0146
-2.5247	2.2691	-60.599	-61.269	0.8066	0	0.80422	4.0247
-2.5245	2.2693	-60.413	-61.147	0.80641	0	0.81488	4.0348
-2.5243	2.2695	-60.37	-61.199	0.80616	0	0.82564	4.0447
-2.5241	2.2697	-60.276	-61.226	0.80584	0	0.8365	4.0544
-2.5239	2.2699	-60.444	-60.952	0.80544	0	0.84746	4.0641
-2.5237	2.27	-60.255	-61.122	0.80498	0	0.85851	4.0737
-2.5235	2.2702	-60.23	-60.991	0.80445	0	0.86966	4.0831
-2.5233	2.2704	-60.273	-61.144	0.80384	0	0.8809	4.0924
-2.5231	2.2706	-60.279	-61.034	0.80317	0	0.89223	4.1016
-2.5229	2.2707	-60.316	-61.031	0.80244	0	0.90366	4.1106
-2.5227	2.2709	-60.517	-61.022	0.80163	0	0.91518	4.1195
-2.5225	2.2711	-60.566	-61.125	0.80076	0	0.92679	4.1283
-2.5223	2.2713	-60.639	-61.19	0.79982	0	0.93848	4.137
-2.5221	2.2715	-60.688	-61.302	0.79881	0	0.95027	4.1455
-2.5219	2.2716	-60.627	-61.028	0.79774	0	0.96213	4.1539
-2.5217	2.2718	-60.621	-60.997	0.79661	0	0.97409	4.1622
-2.5215	2.272	-60.587	-60.848	0.79541	0	0.98612	4.1704
-2.5213	2.2722	-60.477	-61.171	0.79415	0	0.99824	4.1784
-2.5211	2.2724	-60.404	-60.933	0.79282	0	1.0104	4.1863
-2.5209	2.2725	-60.187	-60.955	0.79144	0	1.0227	4.194
-2.5207	2.2727	-60.038	-60.958	0.78999	0	1.0351	4.2017
-2.5205	2.2729	-60.23	-61.092	0.78848	0	1.0475	4.2092
-2.5203	2.2731	-60.224	-61.119	0.78691	0	1.06	4.2165
-2.5201	2.2733	-60.087	-61.321	0.78529	0	1.0726	4.2238
-2.5199	2.2734	-60.236	-61.11	0.78361	0	1.0852	4.2309
-2.5197	2.2736	-60.422	-61.199	0.78187	0	1.0979	4.2378
-2.5195	2.2738	-60.303	-61.089	0.78007	0	1.1107	4.2446
-2.5193	2.274	-60.468	-61.138	0.77822	0	1.1235	4.2513
-2.5191	2.2742	-60.557	-61.403	0.77631	0	1.1364	4.2579
-2.5189	2.2743	-60.551	-61.388	0.77436	0	1.1494	4.2643
-2.5187	2.2745	-60.703	-61.333	0.77235	0	1.1624	4.2706
-2.5185	2.2747	-60.715	-61.345	0.77028	0	1.1668	4.2768
-2.5183	2.2749	-60.688	-61.238	0.76817	0	1.1802	4.2828
-2.5181	2.2751	-60.795	-61.373	0.76601	0	1.1937	4.2886
-2.5179	2.2752	-60.813	-61.37	0.7638	0	1.2072	4.2944
-2.5177	2.2754	-60.99	-61.464	0.76155	0	1.2207	4.3
-2.5175	2.2756	-61.146	-61.159	0.75925	0	1.2343	4.3055
-2.5173	2.2758	-61.173	-61.141	0.7569	0	1.2479	4.3108
-2.5171	2.276	-61.161	-61.177	0.75451	0	1.2615	4.316
-2.5169	2.2761	-61.252	-60.842	0.75207	0	1.2752	4.3211
-2.5167	2.2763	-61.31	-60.765	0.7496	0	1.289	4.326
-2.5165	2.2765	-61.426	-60.918	0.74709	0	1.3027	4.3308
-2.5163	2.2767	-61.518	-60.823	0.74453	0	1.3165	4.3354
-2.5161	2.2769	-61.597	-60.75	0.74194	0	1.3303	4.34
-2.5159	2.277	-61.664	-60.689	0.73931	0	1.3442	4.3443
-2.5157	2.2772	-61.649	-60.445	0.73665	0	1.358	4.3486
-2.5155	2.2774	-61.503	-60.253	0.73395	0	1.3719	4.3527
-2.5153	2.2776	-61.353	-60.067	0.73122	0	1.3858	4.3567
-2.5151	2.2778	-61.347	-60.155	0.72845	0	1.3998	4.3605
-2.5149	2.2779	-61.402	-60.189	0.72566	0	1.4137	4.3643
-2.5147	2.2781	-61.387	-60.201	0.72284	0	1.4277	4.3678
-2.5145	2.2783	-61.466	-60.332	0.71999	0	1.4417	4.3713
-2.5143	2.2785	-61.39	-60.54	0.71711	0	1.4556	4.3746
-2.5141	2.2787	-61.588	-60.549	0.71421	0	1.4696	4.3778
-2.5139	2.2788	-61.5	-60.332	0.71128	0	1.4836	4.3808
-2.5137	2.279	-61.652	-60.521	0.70833	0	1.4976	4.3838
-2.5135	2.2792	-61.93	-60.32	0.70536	0	1.5116	4.3866
-2.5133	2.2794	-61.881	-60.677	0.70237	0	1.5256	4.3892
-2.5131	2.2796	-62.006	-60.652	0.69936	0	1.5396	4.3917
-2.5129	2.2797	-62.07	-60.555	0.69634	0	1.5536	4.3941
-2.5127	2.2799	-62.141	-60.686	0.69329	0	1.5676	4.3964
-2.5125	2.2801	-62.223	-60.878	0.69024	0	1.5815	4.3986
-2.5123	2.2803	-62.147	-60.692	0.68717	0	1.5955	4.4006
-2.5121	2.2805	-62.333	-60.845	0.68409	0	1.6094	4.4025
-2.5119	2.2807	-62.318	-60.952	0.68099	0	1.6234	4.4042
-2.5117	2.2808	-62.165	-60.921	0.67789	0	1.6373	4.4059
-2.5115	2.281	-62.26	-60.784	0.67478	0	1.6512	4.4074
-2.5113	2.2812	-62.028	-60.997	0.67167	0	1.665	4.4088
-2.5111	2.2814	-61.997	-60.887	0.66855	0	1.6788	4.4101
-2.5109	2.2816	-61.921	-60.854	0.66542	0	1.6926	4.4112
-2.5107	2.2817	-61.796	-61.061	0.6623	0	1.7064	4.4123
-2.5105	2.2819	-61.863	-60.762	0.65917	0	1.7201	4.4059
-2.5103	2.2821	-61.927	-60.701	0.65605	0	1.7338	4.4069
-2.5101	2.2823	-61.921	-60.796	0.65292	0	1.7475	4.4078
-2.5099	2.2825	-61.957	-60.811	0.6498	0	1.7611	4.4086
-2.5097	2.2826	-61.97	-60.857	0.64669	0	1.7747	4.4092
-2.5095	2.2828	-62.101	-61.071	0.64358	0	1.7882	4.4097
-2.5093	2.283	-62.33	-60.894	0.64048	0	1.8017	4.4101
-2.5091	2.2832	-62.229	-60.985	0.63738	0	1.8151	4.4104
-2.5089	2.2834	-62.333	-60.912	0.6343	0	1.8285	4.4181
-2.5087	2.2836	-62.54	-61.046	0.63123	0	1.8418	4.4184
-2.5085	2.2837	-62.565	-61.132	0.62817	0	1.855	4.4185
-2.5083	2.2839	-62.806	-60.973	0.62513	0	1.8682	4.4186
-2.5081	2.2841	-62.678	-61.071	0.6221	0	1.8813	4.4185
-2.5079	2.2843	-62.867	-61.068	0.61909	0	1.8944	4.4183
-2.5077	2.2845	-62.833	-61.196	0.61609	0	1.9074	4.4181
-2.5075	2.2846	-62.833	-61.223	0.61312	0	1.9203	4.4177
-2.5073	2.2848	-62.852	-61.104	0.61017	0	1.9332	4.4172
-2.5071	2.285	-62.717	-61.367	0.60723	0	1.9459	4.4167
-2.5069	2.2852	-62.458	-61.187	0.60433	0	1.9586	4.416
-2.5067	2.2854	-62.409	-61.202	0.60144	0	1.9713	4.4152
-2.5065	2.2855	-62.293	-61.187	0.59859	0	1.9838	4.4143
-2.5063	2.2857	-62.424	-61.223	0.59576	0	1.9962	4.4134
-2.5061	2.2859	-62.476	-61.174	0.59296	0	2.0086	4.4123
-2.5059	2.2861	-62.525	-60.909	0.59018	0	2.0209	4.4112
-2.5057	2.2863	-62.424	-60.924	0.58744	0	2.0331	4.4099
-2.5055	2.2865	-62.458	-60.897	0.58473	0	2.0452	4.4086
-2.5053	2.2866	-62.266	-60.897	0.58206	0	2.0571	4.4072
-2.5051	2.2868	-62.131	-60.787	0.57941	0	2.069	4.4056
-2.5049	2.287	-62.232	-60.701	0.57681	0	2.0808	4.404
-2.5047	2.2872	-62.119	-60.814	0.57424	0	2.0925	4.4024
-2.5045	2.2874	-62.351	-60.561	0.57171	0	2.1041	4.4006
-2.5043	2.2875	-62.293	-60.436	0.56921	0	2.1156	4.3987
-2.5041	2.2877	-62.314	-60.308	0.56676	0	2.1269	4.3968
-2.504	2.2879	-62.388	-60.048	0.56435	0	2.1382	4.3948
-2.5038	2.2881	-62.4	-60.027	0.56197	0	2.1493	4.3927
-2.5036	2.2883	-62.238	-60.054	0.55965	0	2.1604	4.3905
-2.5034	2.2885	-62.375	-59.926	0.55736	0	2.1713	4.3883
-2.5032	2.2886	-62.641	-59.835	0.55512	0	2.1821	4.3859
-2.503	2.2888	-62.647	-59.954	0.55293	0	2.1927	4.3835
-2.5028	2.289	-62.687	-59.896	0.55078	0	2.2033	4.3811
-2.5026	2.2892	-62.672	-59.984	0.54868	0	2.2137	4.3785
-2.5024	2.2894	-62.986	-60.005	0.54663	0	2.224	4.3759
-2.5022	2.2896	-63.071	-60.112	0.54463	0	2.2341	4.3732
-2.502	2.2897	-62.931	-60.192	0.54268	0	2.2442	4.3705
-2.5018	2.2899	-62.916	-60.201	0.54078	0	2.2541	4.3677
-2.5016	2.2901	-62.876	-60.195	0.53894	0	2.2638	4.3648
-2.5014	2.2903	-63.16	-60.247	0.53714	0	2.2734	4.3618
-2.5012	2.2905	-63.154	-60.244	0.5354	0	2.2829	4.3588
-2.501	2.2906	-63.093	-60.411	0.53372	0	2.2923	4.3558
-2.5008	2.2908	-63.016	-60.353	0.53208	0	2.3015	4.3526
-2.5006	2.291	-63.08	-60.283	0.53051	0	2.3105	4.3494
-2.5004	2.2912	-63.056	-60.372	0.52899	0	2.3194	4.3462
-2.5002	2.2914	-63.062	-60.509	0.52753	0	2.3282	4.3429
-2.5	2.2916	-63.312	-60.366	0.52612	0	2.3368	4.3395
-2.4998	2.2917	-63.264	-60.472	0.52478	0	2.3453	4.3361
-2.4996	2.2919	-63.309	-60.533	0.52349	0	2.3536	4.3326
-2.4994	2.2921	-63.386	-60.625	0.52226	0	2.3618	4.3291
-2.4992	2.2923	-63.349	-60.521	0.52109	0	2.3698	4.3255
-2.499	2.2925	-63.535	-60.363	0.51999	0	2.3776	4.3218
-2.4988	2.2927	-63.508	-60.411	0.51894	0	2.3853	4.3181
-2.4986	2.2928	-63.55	-60.591	0.51795	0	2.3928	4.3144
-2.4984	2.293	-63.602	-60.619	0.51703	0	2.4002	4.3106
-2.4982	2.2932	-63.587	-60.692	0.51617	0	2.4074	4.3068
-2.498	2.2934	-63.541	-60.543	0.51537	0	2.4145	4.3029
-2.4978	2.2936	-63.694	-60.585	0.51463	0	2.4214	4.299
-2.4976	2.2938	-63.691	-60.555	0.51396	0	2.4281	4.295
-2.4974	2.2939	-63.538	-60.631	0.51335	0	2.4347	4.291
-2.4972	2.2941	-63.724	-60.643	0.51281	0	2.4411	4.2869
-2.497	2.2943	-63.63	-60.756	0.51232	0	2.4473	4.2828
-2.4968	2.2945	-63.52	-60.485	0.51191	0	2.4533	4.2787
-2.4966	2.2947	-63.685	-60.622	0.51155	0	2.4592	4.2745
-2.4964	2.2948	-63.7	-60.494	0.51126	0	2.4649	4.2703
-2.4962	2.295	-63.752	-60.707	0.51104	0	2.4705	4.266
-2.496	2.2952	-63.715	-60.619	0.51088	0	2.4759	4.2617
-2.4958	2.2954	-63.752	-60.637	0.51079	0	2.4811	4.2573
-2.4956	2.2956	-63.801	-60.775	0.51076	0	2.4861	4.2529
-2.4954	2.2958	-63.727	-60.591	0.51079	0	2.4909	4.2485
-2.4952	2.2959	-63.734	-60.677	0.51089	0	2.4956	4.244
-2.495	2.2961	-63.23	-60.677	0.51106	0	2.5001	4.2395
-2.4948	2.2963	-62.998	-60.506	0.51129	0	2.5044	4.235
-2.4946	2.2965	-62.864	-60.497	0.51158	0	2.5086	4.2304
-2.4944	2.2967	-62.897	-60.53	0.51194	0	2.5126	4.2258
-2.4942	2.2969	-62.928	-60.588	0.51236	0	2.5164	4.2212
-2.494	2.297	-63.047	-60.588	0.51285	0	2.52	4.2165
-2.4938	2.2972	-63.093	-60.421	0.5134	0	2.5234	4.2118
-2.4936	2.2974	-62.876	-60.57	0.51401	0	2.5267	4.207
-2.4934	2.2976	-63.245	-60.549	0.51469	0	2.5297	4.2023
-2.4932	2.2978	-63.19	-60.375	0.51543	0	2.5326	4.1975
-2.493	2.298	-63.138	-60.35	0.51624	0	2.5354	4.1926
-2.4928	2.2982	-63.349	-60.457	0.5171	0	2.5379	4.1877
-2.4926	2.2983	-63.444	-60.372	0.51803	0	2.5403	4.1828
-2.4924	2.2985	-63.422	-60.469	0.51902	0	2.5424	4.1779
-2.4922	2.2987	-63.422	-60.466	0.52007	0	2.5444	4.1729
-2.492	2.2989	-63.538	-60.512	0.52118	0	2.5463	4.1679
-2.4918	2.2991	-63.691	-60.485	0.52236	0	2.5479	4.1629
-2.4916	2.2993	-63.474	-60.564	0.52359	0	2.5494	4.1578
-2.4914	2.2994	-63.535	-60.881	0.52488	0	2.5506	4.1527
-2.4912	2.2996	-63.605	-60.82	0.52623	0	2.5517	4.1476
-2.491	2.2998	-63.618	-60.744	0.52764	0	2.5527	4.1424
-2.4908	2.3	-63.486	-60.857	0.52911	0	2.5534	4.1372
-2.4906	2.3002	-63.526	-60.613	0.53063	0	2.554	4.132
-2.4904	2.3004	-63.523	-60.729	0.53221	0	2.5543	4.1267
-2.4902	2.3005	-63.416	-60.784	0.53385	0	2.5545	4.1288
-2.49	2.3007	-63.495	-60.72	0.53554	0	2.5546	4.1238
-2.4898	2.3009	-63.514	-60.668	0.53728	0	2.5544	4.1186
-2.4896	2.3011	-63.55	-60.53	0.53908	0	2.5541	4.1135
-2.4894	2.3013	-63.486	-60.616	0.54093	0	2.5536	4.1083
-2.4892	2.3015	-63.532	-60.546	0.54284	0	2.5529	4.1031
-2.489	2.3016	-63.566	-60.485	0.54479	0	2.552	4.0979
-2.4888	2.3018	-63.517	-60.707	0.5468	0	2.551	4.0926
-2.4886	2.302	-63.688	-60.475	0.54885	0	2.5498	4.0874
-2.4884	2.3022	-63.767	-60.521	0.55095	0	2.5484	4.0821
-2.4882	2.3024	-63.77	-60.46	0.5531	0	2.5468	4.0767
-2.488	2.3026	-63.691	-60.274	0.5553	0	2.5451	4.0714
-2.4878	2.3028	-63.877	-60.326	0.55754	0	2.5432	4.066
-2.4876	2.3029	-63.853	-60.244	0.55983	0	2.5411	4.0606
-2.4874	2.3031	-63.981	-60.381	0.56216	0	2.5388	4.0552
-2.4872	2.3033	-63.737	-60.24	0.56454	0	2.5364	4.0497
-2.487	2.3035	-63.92	-60.259	0.56695	0	2.5338	4.0442
-2.4868	2.3037	-63.831	-60.286	0.56941	0	2.5311	4.0387
-2.4866	2.3039	-63.743	-60.173	0.57191	0	2.5281	4.0331
-2.4864	2.304	-63.618	-60.082	0.57444	0	2.525	4.0276
-2.4862	2.3042	-63.474	-60.009	0.57702	0	2.5218	4.022
-2.486	2.3044	-63.608	-59.755	0.57962	0	2.5184	4.0163
-2.4858	2.3046	-63.337	-59.85	0.58227	0	2.5148	4.0107
-2.4856	2.3048	-63.471	-59.911	0.58495	0	2.511	4.005
-2.4854	2.305	-63.465	-59.676	0.58766	0	2.5071	3.9993
-2.4852	2.3052	-63.48	-59.804	0.5904	0	2.503	3.9935
-2.485	2.3053	-63.639	-59.795	0.59318	0	2.4988	3.9878
-2.4848	2.3055	-63.682	-59.587	0.59598	0	2.4944	3.982
-2.4846	2.3057	-63.715	-59.249	0.59881	0	2.4899	3.9761
-2.4844	2.3059	-63.782	-59.31	0.60167	0	2.4852	3.9703
-2.4842	2.3061	-63.636	-59.23	0.60456	0	2.4803	3.9644
-2.484	2.3063	-63.59	-59.34	0.60747	0	2.4753	3.9584
-2.4838	2.3064	-63.535	-59.484	0.6104	0	2.4701	3.9525
-2.4836	2.3066	-63.788	-59.426	0.61336	0	2.4648	3.9465
-2.4834	2.3068	-63.73	-59.41	0.61633	0	2.4593	3.9404
-2.4832	2.307	-63.691	-59.465	0.61933	0	2.4537	3.9344
-2.483	2.3072	-63.526	-59.694	0.62234	0	2.448	3.9283
-2.4828	2.3074	-63.59	-59.627	0.62537	0	2.4421	3.9221
-2.4826	2.3076	-63.538	-59.67	0.62841	0	2.436	3.916
-2.4824	2.3077	-63.425	-59.636	0.63147	0	2.4411	3.9098
-2.4822	2.3079	-63.395	-59.893	0.63455	0	2.4351	3.9035
-2.482	2.3081	-63.642	-59.783	0.63763	0	2.429	3.8911
-2.4818	2.3083	-63.532	-59.825	0.64072	0	2.4227	3.8849
-2.4816	2.3085	-63.514	-60.112	0.64383	0	2.4163	3.8788
-2.4814	2.3087	-63.373	-59.896	0.64694	0	2.4098	3.8726
-2.4812	2.3089	-63.355	-60.039	0.65005	0	2.4032	3.8663
-2.481	2.309	-63.254	-59.972	0.65317	0	2.3964	3.86
-2.4808	2.3092	-63.346	-60.198	0.6563	0	2.3895	3.8537
-2.4806	2.3094	-63.157	-60.17	0.65942	0	2.3825	3.8547
-2.4804	2.3096	-62.995	-60.161	0.66255	0	2.3754	3.8485
-2.4802	2.3098	-62.787	-60.326	0.66567	0	2.3682	3.8423
-2.48	2.31	-62.586	-60.427	0.6688	0	2.3608	3.836
-2.4798	2.3102	-62.433	-60.5	0.67192	0	2.3534	3.8224
-2.4796	2.3103	-62.522	-60.582	0.67503	0	2.3458	3.8238
-2.4794	2.3105	-62.433	-60.512	0.67814	0	2.3381	3.8178
-2.4792	2.3107	-62.614	-60.491	0.68124	0	2.3304	3.8119
-2.479	2.3109	-62.461	-60.494	0.68433	0	2.3225	3.8132
-2.4788	2.3111	-62.513	-60.417	0.68741	0	2.3145	3.8074
-2.4786	2.3113	-62.458	-60.472	0.69048	0	2.3064	3.8015
-2.4784	2.3115	-62.238	-60.54	0.69354	0	2.2982	3.7956
-2.4782	2.3116	-62.229	-60.582	0.69658	0	2.2899	3.7896
-2.478	2.3118	-62.293	-60.591	0.6996	0	2.2815	3.7837
-2.4778	2.312	-62.284	-60.674	0.70261	0	2.273	3.7776
-2.4776	2.3122	-62.501	-60.891	0.7056	0	2.2645	3.7716
-2.4774	2.3124	-62.531	-60.79	0.70857	0	2.2558	3.7655
-2.4772	2.3126	-62.58	-60.912	0.71152	0	2.2471	3.7594
-2.477	2.3128	-62.623	-60.778	0.71444	0	2.2382	3.7533
-2.4768	2.3129	-62.501	-60.836	0.71734	0	2.2293	3.7471
-2.4767	2.3131	-62.552	-60.936	0.72022	0	2.2203	3.741
-2.4765	2.3133	-62.473	-60.967	0.72306	0	2.2113	3.7347
-2.4763	2.3135	-62.549	-61.071	0.72589	0	2.2021	3.7285
-2.4761	2.3137	-62.504	-61.055	0.72868	0	2.1929	3.7222
-2.4759	2.3139	-62.412	-60.982	0.73144	0	2.1836	3.7159
-2.4757	2.3141	-62.302	-60.823	0.73417	0	2.1742	3.7096
-2.4755	2.3142	-62.589	-60.805	0.73686	0	2.1648	3.7032
-2.4753	2.3144	-62.516	-60.799	0.73952	0	2.1665	3.6968
-2.4751	2.3146	-62.617	-60.836	0.74215	0	2.1573	3.6904
-2.4749	2.3148	-62.552	-60.955	0.74474	0	2.148	3.684
-2.4747	2.315	-62.824	-60.875	0.74729	0	2.1387	3.6776
-2.4745	2.3152	-62.76	-61.046	0.7498	0	2.1293	3.6711
-2.4743	2.3154	-62.952	-60.982	0.75227	0	2.1199	3.6646
-2.4741	2.3155	-62.943	-60.97	0.7547	0	2.1104	3.658
-2.4739	2.3157	-63.141	-61.016	0.75709	0	2.1009	3.6515
-2.4737	2.3159	-62.937	-61.006	0.75943	0	2.0913	3.6449
-2.4735	2.3161	-62.977	-61.071	0.76173	0	2.0817	3.6383
-2.4733	2.3163	-62.818	-60.799	0.76398	0	2.0721	3.6317
-2.4731	2.3165	-62.781	-60.491	0.76619	0	2.0624	3.6251
-2.4729	2.3167	-62.937	-60.201	0.76834	0	2.0527	3.6184
-2.4727	2.3169	-63.01	-60.134	0.77045	0	2.043	3.6118
-2.4725	2.317	-63.083	-60.143	0.77251	0	2.0332	3.6051
-2.4723	2.3172	-63.196	-60.216	0.77452	0	2.0235	3.5984
-2.4721	2.3174	-63.364	-59.963	0.77647	0	2.0137	3.5916
-2.4719	2.3176	-63.187	-60.143	0.77837	0	2.0039	3.5849
-2.4717	2.3178	-63.224	-60.216	0.78022	0	1.994	3.5782
-2.4715	2.318	-63.453	-60.39	0.78201	0	1.9842	3.5714
-2.4713	2.3182	-63.618	-60.411	0.78374	0	1.9743	3.5646
-2.4711	2.3183	-63.59	-60.35	0.78542	0	1.9644	3.5578
-2.4709	2.3185	-63.636	-60.509	0.78704	0	1.9546	3.551
-2.4707	2.3187	-63.801	-60.57	0.7886	0	1.9447	3.5442
-2.4705	2.3189	-63.853	-60.674	0.79011	0	1.9348	3.5374
-2.4703	2.3191	-63.7	-60.634	0.79155	0	1.9249	3.5306
-2.4701	2.3193	-63.535	-60.61	0.79293	0	1.915	3.5237
-2.4699	2.3195	-63.489	-60.662	0.79425	0	1.9051	3.5169
-2.4697	2.3197	-63.212	-60.649	0.79551	0	1.8953	3.51
-2.4695	2.3198	-62.9	-60.814	0.7967	0	1.8854	3.5032
-2.4693	2.32	-62.861	-60.799	0.79783	0	1.8755	3.4963
-2.4691	2.3202	-63.041	-60.765	0.79889	0	1.8657	3.4895
-2.4689	2.3204	-63.114	-60.857	0.79989	0	1.8559	3.4826
-2.4687	2.3206	-63.12	-60.842	0.80083	0	1.8461	3.4758
-2.4685	2.3208	-63.096	-60.863	0.8017	0	1.8363	3.4689
-2.4683	2.321	-63.157	-60.778	0.8025	0	1.8265	3.4621
-2.4681	2.3212	-63.145	-60.775	0.80323	0	1.8168	3.4552
-2.4679	2.3213	-63.126	-60.567	0.80389	0	1.8071	3.4484
-2.4677	2.3215	-63.148	-60.75	0.80449	0	1.7974	3.4415
-2.4675	2.3217	-63.056	-60.857	0.80502	0	1.7877	3.4347
-2.4673	2.3219	-63.132	-60.887	0.80548	0	1.7781	3.4279
-2.4671	2.3221	-63.175	-60.936	0.80587	0	1.7685	3.4211
-2.4669	2.3223	-63.227	-61.003	0.80618	0	1.759	3.4143
-2.4667	2.3225	-63.27	-60.988	0.80643	0	1.7495	3.4075
-2.4665	2.3227	-63.34	-61.022	0.80661	0	1.74	3.4007
-2.4663	2.3228	-63.395	-61.077	0.80671	0	1.7306	3.394
-2.4661	2.323	-63.526	-61.159	0.80675	0	1.7212	3.3872
-2.4659	2.3232	-63.572	-61.058	0.80671	0	1.7119	3.3805
-2.4657	2.3234	-63.529	-60.964	0.8066	0	1.7026	3.3738
-2.4655	2.3236	-63.453	-61.034	0.80642	0	1.6934	3.3671
-2.4653	2.3238	-63.514	-61.058	0.80616	0	1.6843	3.3604
-2.4651	2.324	-63.529	-60.924	0.80583	0	1.6752	3.3538
-2.4649	2.3242	-63.553	-61.028	0.80543	0	1.6661	3.3472
-2.4647	2.3243	-63.596	-61.135	0.80496	0	1.6572	3.3406
-2.4645	2.3245	-63.532	-61.003	0.80442	0	1.6483	3.334
-2.4643	2.3247	-63.627	-61.321	0.8038	0	1.6394	3.3275
-2.4641	2.3249	-63.596	-61.061	0.80311	0	1.6307	3.3209
-2.4639	2.3251	-63.572	-61.135	0.80234	0	1.622	3.3145
-2.4637	2.3253	-63.651	-60.878	0.8015	0	1.6133	3.308
-2.4635	2.3255	-63.483	-60.768	0.80059	0	1.6048	3.3016
-2.4633	2.3257	-63.447	-60.695	0.79961	0	1.5963	3.2952
-2.4631	2.3258	-63.425	-60.353	0.79856	0	1.5879	3.2889
-2.4629	2.326	-63.66	-60.497	0.79743	0	1.5796	3.2826
-2.4627	2.3262	-63.511	-60.662	0.79623	0	1.5713	3.2763
-2.4625	2.3264	-63.666	-60.656	0.79496	0	1.5632	3.2701
-2.4623	2.3266	-63.81	-60.71	0.79361	0	1.5551	3.2639
-2.4621	2.3268	-63.611	-60.872	0.79219	0	1.5472	3.2578
-2.4619	2.327	-63.303	-60.726	0.79071	0	1.5393	3.2517
-2.4617	2.3272	-63.065	-60.829	0.78915	0	1.5315	3.2456
-2.4615	2.3274	-63.196	-60.829	0.78752	0	1.5238	3.2396
-2.4613	2.3275	-63.157	-60.793	0.78582	0	1.5162	3.2337
-2.4611	2.3277	-63.019	-60.649	0.78405	0	1.5087	3.2278
-2.4609	2.3279	-63.126	-60.314	0.78221	0	1.5013	3.2147
-2.4607	2.3281	-63.068	-60.417	0.7803	0	1.494	3.2091
-2.4605	2.3283	-63.248	-60.244	0.77832	0	1.4868	3.2036
-2.4603	2.3285	-63.428	-60.381	0.77627	0	1.4798	3.1908
-2.4601	2.3287	-63.398	-60.375	0.77416	0	1.4728	3.1856
-2.4599	2.3289	-63.48	-60.35	0.77197	0	1.4659	3.1804
-2.4597	2.329	-63.526	-60.314	0.76972	0	1.4592	3.1753
-2.4595	2.3292	-63.306	-60.439	0.76741	0	1.4525	3.1702
-2.4593	2.3294	-63.63	-60.25	0.76503	0	1.446	3.1652
-2.4591	2.3296	-63.526	-60.314	0.76258	0	1.4396	3.1603
-2.4589	2.3298	-63.697	-60.32	0.76006	0	1.4333	3.1553
-2.4587	2.33	-63.755	-60.451	0.75749	0	1.4271	3.1505
-2.4585	2.3302	-63.761	-60.408	0.75485	0	1.421	3.1457
-2.4583	2.3304	-63.801	-60.256	0.75214	0	1.4151	3.141
-2.4581	2.3306	-63.718	-60.076	0.74938	0	1.4093	3.1363
-2.4579	2.3307	-63.889	-59.597	0.74655	0	1.4036	3.1317
-2.4577	2.3309	-63.825	-59.319	0.74366	0	1.398	3.1272
-2.4575	2.3311	-63.843	-59.236	0.74071	0	1.3926	3.1227
-2.4573	2.3313	-63.73	-59.133	0.7377	0	1.3872	3.1257
-2.4571	2.3315	-63.773	-59.133	0.73464	0	1.3821	3.128
-2.4569	2.3317	-63.77	-59.2	0.73151	0	1.377	3.1242
-2.4567	2.3319	-63.679	-59.246	0.72833	0	1.3721	3.1204
-2.4565	2.3321	-63.346	-59.41	0.72509	0	1.3673	3.1167
-2.4563	2.3323	-63.395	-59.236	0.7218	0	1.3627	3.1131
-2.4561	2.3324	-63.425	-59.554	0.71845	0	1.3581	3.1096
-2.4559	2.3326	-63.303	-59.487	0.71505	0	1.3538	3.1062
-2.4557	2.3328	-63.236	-59.484	0.7116	0	1.3495	3.1029
-2.4555	2.333	-63.187	-59.288	0.70809	0	1.3454	3.0923
-2.4553	2.3332	-63.273	-59.465	0.70453	0	1.3414	3.0894
-2.4551	2.3334	-63.517	-59.41	0.70092	0	1.3376	3.0865
-2.4549	2.3336	-63.526	-59.322	0.69726	0	1.3339	3.0837
-2.4547	2.3338	-63.721	-59.505	0.69356	0	1.3304	3.0811
-2.4545	2.334	-63.758	-59.661	0.6898	0	1.327	3.0785
-2.4543	2.3342	-63.807	-59.664	0.686	0	1.3237	3.076
-2.4541	2.3343	-63.792	-59.45	0.68216	0	1.3206	3.0736
-2.4539	2.3345	-63.636	-59.801	0.67827	0	1.3177	3.0713
-2.4537	2.3347	-63.874	-59.88	0.67433	0	1.3149	3.0691
-2.4535	2.3349	-63.816	-60.021	0.67036	0	1.3122	3.067
-2.4533	2.3351	-64.017	-60.033	0.66634	0	1.3097	3.0587
-2.4531	2.3353	-63.88	-60.045	0.66228	0	1.3073	3.057
-2.4529	2.3355	-64.008	-60.121	0.65818	0	1.3051	3.0553
-2.4527	2.3357	-64.078	-60.222	0.65405	0	1.303	3.0538
-2.4525	2.3359	-64.261	-60.07	0.64987	0	1.301	3.0524
-2.4523	2.336	-64.075	-60.256	0.64566	0	1.2993	3.051
-2.4521	2.3362	-64.005	-59.96	0.64141	0	1.2976	3.0498
-2.4519	2.3364	-63.962	-59.859	0.63713	0	1.2961	3.0486
-2.4517	2.3366	-63.608	-60.158	0.63282	0	1.2948	3.055
-2.4515	2.3368	-63.651	-60.109	0.62847	0	1.2936	3.0543
-2.4513	2.337	-63.602	-60.045	0.62409	0	1.2926	3.0537
-2.4511	2.3372	-63.718	-60.262	0.61968	0	1.2917	3.0532
-2.4509	2.3374	-63.697	-60.384	0.61524	0	1.291	3.0528
-2.4507	2.3376	-63.563	-60.375	0.61078	0	1.2904	3.0525
-2.4505	2.3378	-63.74	-60.454	0.60628	0	1.29	3.0523
-2.4503	2.3379	-63.81	-60.54	0.60176	0	1.2897	3.0523
-2.4501	2.3381	-63.846	-60.512	0.59722	0	1.2895	3.0523
-2.4499	2.3383	-63.865	-60.594	0.59265	0	1.2896	3.0525
-2.4497	2.3385	-63.849	-60.53	0.58806	0	1.2897	3.0528
-2.4495	2.3387	-63.828	-60.677	0.58345	0	1.29	3.0531
-2.4493	2.3389	-63.926	-60.561	0.57881	0	1.3016	3.0537
-2.4492	2.3391	-63.672	-60.717	0.57416	0	1.3026	3.0543
-2.449	2.3393	-63.465	-60.637	0.56949	0	1.3037	3.055
-2.4488	2.3395	-63.575	-60.491	0.5648	0	1.3049	3.0559
-2.4486	2.3397	-63.547	-60.613	0.56009	0	1.3064	3.0568
-2.4484	2.3399	-63.383	-60.765	0.55537	0	1.3079	3.0579
-2.4482	2.34	-63.141	-60.79	0.55063	0	1.3097	3.0591
-2.448	2.3402	-63.196	-60.527	0.54588	0	1.3116	3.0604
-2.4478	2.3404	-63.199	-60.662	0.54112	0	1.3136	3.0619
-2.4476	2.3406	-63.285	-60.71	0.53634	0	1.3158	3.0634
-2.4474	2.3408	-63.254	-60.497	0.53156	0	1.3181	3.0651
-2.4472	2.341	-63.349	-60.497	0.52677	0	1.3206	3.0668
-2.447	2.3412	-63.529	-60.491	0.52197	0	1.3233	3.0687
-2.4468	2.3414	-63.529	-60.317	0.51716	0	1.3261	3.0707
-2.4466	2.3416	-63.532	-60.228	0.51234	0	1.3291	3.0729
-2.4464	2.3418	-63.63	-60.338	0.50752	0	1.3322	3.0751
-2.4462	2.3419	-63.538	-60.488	0.5027	0	1.3354	3.0775
-2.446	2.3421	-63.544	-60.506	0.49787	0	1.3388	3.0799
-2.4458	2.3423	-63.422	-60.54	0.49277	0	1.3424	3.0825
-2.4456	2.3425	-63.495	-60.482	0.48795	0	1.3461	3.0852
-2.4454	2.3427	-63.627	-60.61	0.48313	0	1.3499	3.088
-2.4452	2.3429	-63.553	-60.808	0.47831	0	1.3539	3.0909
-2.445	2.3431	-63.691	-60.845	0.47349	0	1.358	3.094
-2.4448	2.3433	-63.615	-60.854	0.46867	0	1.3623	3.0971
-2.4446	2.3435	-63.828	-60.82	0.46385	0	1.3667	3.1078
-2.4444	2.3437	-63.871	-60.93	0.45904	0	1.3713	3.1113
-2.4442	2.3439	-63.953	-60.994	0.45423	0	1.376	3.115
-2.444	2.344	-63.929	-60.674	0.44943	0	1.3808	3.1189
-2.4438	2.3442	-64.017	-60.771	0.44464	0	1.3858	3.1228
-2.4436	2.3444	-63.953	-60.625	0.43985	0	1.3909	3.1268
-2.4434	2.3446	-63.947	-60.503	0.43507	0	1.3961	3.131
-2.4432	2.3448	-64.112	-60.594	0.4303	0	1.4014	3.1352
-2.443	2.345	-64.216	-60.326	0.42554	0	1.4069	3.1396
-2.4428	2.3452	-64.298	-60.472	0.42079	0	1.4125	3.1515
-2.4426	2.3454	-64.319	-60.408	0.41606	0	1.4183	3.1563
-2.4424	2.3456	-64.24	-60.213	0.41133	0	1.4241	3.1612
-2.4422	2.3458	-64.38	-60.247	0.40662	0	1.4301	3.1662
-2.442	2.346	-64.286	-60.176	0.40192	0	1.4362	3.1714
-2.4418	2.3462	-64.188	-60.21	0.39724	0	1.4425	3.1766
-2.4416	2.3463	-64.304	-60.149	0.39257	0	1.4488	3.182
-2.4414	2.3465	-64.353	-60.234	0.38792	0	1.4553	3.1875
-2.4412	2.3467	-64.384	-60.32	0.38329	0	1.4618	3.193
-2.441	2.3469	-64.344	-60.283	0.37867	0	1.4685	3.1987
-2.4408	2.3471	-64.304	-60.256	0.37408	0	1.4753	3.2045
-2.4406	2.3473	-64.457	-60.363	0.3695	0	1.4822	3.2104
-2.4404	2.3475	-64.561	-60.53	0.36494	0	1.4892	3.2101
-2.4402	2.3477	-64.442	-60.707	0.3604	0	1.4963	3.2164
-2.44	2.3479	-64.368	-60.396	0.35589	0	1.5035	3.2227
-2.4398	2.3481	-64.463	-60.558	0.35139	0	1.5109	3.2292
-2.4396	2.3483	-64.619	-60.503	0.34692	0	1.5183	3.2358
-2.4394	2.3484	-64.463	-60.53	0.34247	0	1.5258	3.2424
-2.4392	2.3486	-64.481	-60.515	0.33804	0	1.5223	3.2491
-2.439	2.3488	-64.49	-60.552	0.33364	0	1.5304	3.2559
-2.4388	2.349	-64.484	-60.643	0.32926	0	1.5384	3.2628
-2.4386	2.3492	-64.39	-60.793	0.32491	0	1.5466	3.2698
-2.4384	2.3494	-64.426	-60.656	0.32058	0	1.5548	3.2769
-2.4382	2.3496	-64.46	-60.762	0.31628	0	1.5632	3.284
-2.438	2.3498	-64.536	-60.637	0.31201	0	1.5715	3.2913
-2.4378	2.35	-64.405	-60.689	0.30776	0	1.58	3.2986
-2.4376	2.3502	-64.359	-60.872	0.30354	0	1.5885	3.306
-2.4374	2.3504	-64.313	-60.964	0.29935	0	1.5971	3.3061
-2.4372	2.3506	-64.265	-60.906	0.29519	0	1.6057	3.3139
-2.437	2.3508	-64.237	-60.878	0.29106	0	1.6144	3.3217
-2.4368	2.3509	-64.316	-60.811	0.28695	0	1.6232	3.3296
-2.4366	2.3511	-64.084	-61.013	0.28288	0	1.632	3.3375
-2.4364	2.3513	-64.219	-60.945	0.27884	0	1.6409	3.3455
-2.4362	2.3515	-64.164	-61.153	0.27482	0	1.6498	3.3536
-2.436	2.3517	-64.13	-61.031	0.27084	0	1.6587	3.3617
-2.4358	2.3519	-64.316	-60.851	0.26689	0	1.6678	3.3699
-2.4356	2.3521	-64.326	-60.982	0.26297	0	1.6768	3.3781
-2.4354	2.3523	-64.344	-61.089	0.25908	0	1.6859	3.3864
-2.4352	2.3525	-64.362	-60.878	0.25522	0	1.695	3.3948
-2.435	2.3527	-64.5	-60.912	0.2514	0	1.7042	3.4032
-2.4348	2.3529	-64.634	-60.897	0.24761	0	1.7134	3.4116
-2.4346	2.3531	-64.631	-60.869	0.24385	0	1.7226	3.4201
-2.4344	2.3533	-64.551	-60.869	0.24013	0	1.7318	3.4286
-2.4342	2.3534	-64.603	-60.793	0.23644	0	1.7411	3.4372
-2.434	2.3536	-64.612	-60.659	0.23278	0	1.7504	3.4458
-2.4338	2.3538	-64.692	-60.646	0.22916	0	1.7487	3.4545
-2.4336	2.354	-64.637	-60.805	0.22557	0	1.7584	3.4632
-2.4334	2.3542	-64.716	-60.707	0.22201	0	1.768	3.4719
-2.4332	2.3544	-64.643	-60.68	0.21849	0	1.7777	3.4807
-2.433	2.3546	-64.698	-60.689	0.215	0	1.7874	3.4895
-2.4328	2.3548	-64.661	-60.64	0.21155	0	1.797	3.4983
-2.4326	2.355	-64.451	-60.445	0.20813	0	1.8067	3.5072
-2.4324	2.3552	-64.329	-60.311	0.20475	0	1.8163	3.5161
-2.4322	2.3554	-64.402	-60.43	0.2014	0	1.826	3.525
-2.432	2.3556	-64.146	-60.491	0.19809	0	1.8356	3.534
-2.4318	2.3558	-63.88	-60.213	0.19482	0	1.8452	3.5429
-2.4316	2.356	-63.764	-60.308	0.19157	0	1.8548	3.5519
-2.4314	2.3561	-63.758	-60.363	0.18837	0	1.8644	3.5609
-2.4312	2.3563	-63.755	-60.445	0.1852	0	1.874	3.5699
-2.431	2.3565	-63.694	-60.182	0.18206	0	1.8835	3.579
-2.4308	2.3567	-63.792	-60.158	0.17896	0	1.893	3.588
-2.4306	2.3569	-63.737	-60.048	0.17589	0	1.9025	3.5971
-2.4304	2.3571	-63.743	-60.039	0.17286	0	1.9119	3.6061
-2.4302	2.3573	-63.761	-60.009	0.16987	0	1.9213	3.6152
-2.43	2.3575	-63.59	-59.954	0.16691	0	1.9307	3.6243
-2.4298	2.3577	-63.56	-60.137	0.16398	0	1.9401	3.6334
-2.4296	2.3579	-63.422	-60.17	0.1611	0	1.9494	3.6424
-2.4294	2.3581	-63.459	-60.057	0.15824	0	1.9586	3.6515
-2.4292	2.3583	-63.63	-60.189	0.15542	0	1.9678	3.6606
-2.429	2.3585	-63.7	-60.335	0.15264	0	1.977	3.6697
-2.4288	2.3587	-63.697	-60.298	0.14989	0	1.9861	3.6788
-2.4286	2.3589	-63.676	-60.372	0.14718	0	1.9952	3.6878
-2.4284	2.359	-63.715	-60.338	0.1445	0	2.0042	3.6969
-2.4282	2.3592	-63.923	-60.363	0.14185	0	2.0131	3.706
-2.428	2.3594	-64.005	-60.439	0.13924	0	2.022	3.715
-2.4278	2.3596	-63.959	-60.332	0.13667	0	2.0309	3.724
-2.4276	2.3598	-63.984	-60.43	0.13413	0	2.0396	3.733
-2.4274	2.36	-63.822	-60.57	0.13162	0	2.0483	3.742
-2.4272	2.3602	-63.843	-60.488	0.12915	0	2.057	3.751
-2.427	2.3604	-63.795	-60.485	0.12671	0	2.0655	3.76
-2.4268	2.3606	-63.828	-60.628	0.1243	0	2.074	3.7689
-2.4266	2.3608	-63.737	-60.46	0.12193	0	2.0824	3.7778
-2.4264	2.361	-63.877	-60.634	0.1196	0	2.0908	3.7867
-2.4262	2.3612	-63.819	-60.753	0.11729	0	2.099	3.7955
-2.426	2.3614	-63.892	-60.482	0.11502	0	2.1072	3.8044
-2.4258	2.3616	-63.898	-60.68	0.11278	0	2.1153	3.8132
-2.4256	2.3618	-63.962	-60.646	0.11057	0	2.1233	3.8219
-2.4254	2.362	-64.167	-60.866	0.1084	0	2.1312	3.8307
-2.4252	2.3621	-63.929	-60.753	0.10626	0	2.1391	3.8394
-2.425	2.3623	-64.06	-60.741	0.10415	0	2.1468	3.8408
-2.4248	2.3625	-63.941	-60.707	0.10207	0	2.1545	3.8496
-2.4246	2.3627	-63.987	-60.994	0.10002	0	2.162	3.8584
-2.4244	2.3629	-64.005	-60.909	0.098006	0	2.1695	3.8747
-2.4242	2.3631	-64.133	-61.092	0.096022	0	2.1769	3.8836
-2.424	2.3633	-64.088	-61.092	0.094068	0	2.1841	3.8925
-2.4238	2.3635	-64.036	-61.083	0.092145	0	2.1913	3.9014
-2.4236	2.3637	-64.109	-61.159	0.090253	0	2.1983	3.9102
-2.4234	2.3639	-64.023	-61.064	0.08839	0	2.2053	3.9189
-2.4232	2.3641	-63.999	-61.025	0.086558	0	2.2121	3.9276
-2.423	2.3643	-64.008	-61.003	0.084755	0	2.2189	3.9363
-2.4228	2.3645	-64.106	-60.961	0.082981	0	2.2255	3.9449
-2.4226	2.3647	-64.258	-60.759	0.081237	0	2.232	3.9534
-2.4224	2.3649	-64.197	-60.594	0.079521	0	2.2385	3.9619
-2.4222	2.3651	-63.911	-60.564	0.077833	0	2.2447	3.9704
-2.422	2.3653	-64.045	-60.671	0.076174	0	2.2509	3.9788
-2.4219	2.3654	-63.792	-60.689	0.074543	0	2.257	3.9871
-2.4217	2.3656	-63.727	-60.68	0.07294	0	2.2629	3.9954
-2.4215	2.3658	-63.712	-60.72	0.071364	0	2.2688	4.0036
-2.4213	2.366	-63.859	-60.836	0.069815	0	2.2745	4.0118
-2.4211	2.3662	-63.734	-60.796	0.068293	0	2.2801	4.0274
-2.4209	2.3664	-63.648	-60.759	0.066797	0	2.2855	4.0357
-2.4207	2.3666	-63.734	-60.805	0.065328	0	2.2909	4.0439
-2.4205	2.3668	-63.898	-60.924	0.063885	0	2.2961	4.0521
-2.4203	2.367	-63.969	-61.086	0.062467	0	2.3012	4.0602
-2.4201	2.3672	-63.849	-61.089	0.061075	0	2.3061	4.0682
-2.4199	2.3674	-63.99	-61.214	0.059708	0	2.311	4.0762
-2.4197	2.3676	-63.895	-60.985	0.058365	0	2.3157	4.0842
-2.4195	2.3678	-63.743	-61.104	0.057048	0	2.3203	4.092
-2.4193	2.368	-63.55	-60.958	0.055754	0	2.3247	4.0998
-2.4191	2.3682	-63.532	-60.68	0.054484	0	2.329	4.1076
-2.4189	2.3684	-63.624	-60.433	0.053238	0	2.3332	4.1153
-2.4187	2.3686	-63.547	-60.295	0.052016	0	2.3373	4.1229
-2.4185	2.3688	-63.291	-60.402	0.050816	0	2.3412	4.1305
-2.4183	2.369	-63.199	-60.192	0.049639	0	2.345	4.138
-2.4181	2.3692	-63.148	-60.305	0.048485	0	2.3486	4.1455
-2.4179	2.3693	-63.199	-60.457	0.047352	0	2.3521	4.1529
-2.4177	2.3695	-63.059	-60.463	0.046242	0	2.3555	4.1602
-2.4175	2.3697	-62.849	-60.5	0.045153	0	2.3588	4.1674
-2.4173	2.3699	-62.723	-60.549	0.044085	0	2.3619	4.1746
-2.4171	2.3701	-62.836	-60.671	0.043039	0	2.3648	4.1818
-2.4169	2.3703	-62.76	-60.475	0.042013	0	2.3677	4.1888
-2.4167	2.3705	-62.684	-60.585	0.041007	0	2.3704	4.1958
-2.4165	2.3707	-62.592	-60.558	0.040022	0	2.3729	4.1955
-2.4163	2.3709	-62.531	-60.622	0.039056	0	2.3754	4.2026
-2.4161	2.3711	-62.571	-60.64	0.03811	0	2.3776	4.2096
-2.4159	2.3713	-62.363	-60.634	0.037183	0	2.3798	4.2165
-2.4157	2.3715	-62.455	-60.771	0.036275	0	2.3818	4.2233
-2.4155	2.3717	-62.537	-60.808	0.035385	0	2.3837	4.2301
-2.4153	2.3719	-62.687	-60.86	0.034514	0	2.3854	4.2368
-2.4151	2.3721	-62.446	-61.064	0.033662	0	2.387	4.2434
-2.4149	2.3723	-62.412	-60.839	0.032826	0	2.3884	4.25
-2.4147	2.3725	-62.437	-61.125	0.032009	0	2.3897	4.2564
-2.4145	2.3727	-62.488	-61.055	0.031209	0	2.3909	4.2628
-2.4143	2.3729	-62.385	-61.132	0.030425	0	2.392	4.2692
-2.4141	2.3731	-62.336	-61.174	0.029659	0	2.3929	4.2754
-2.4139	2.3733	-62.449	-61.132	0.028909	0	2.3936	4.2816
-2.4137	2.3735	-62.495	-61.486	0.028175	0	2.3942	4.2877
-2.4135	2.3736	-62.62	-61.183	0.027457	0	2.3947	4.2937
-2.4133	2.3738	-62.69	-61.312	0.026754	0	2.3951	4.2996
-2.4131	2.374	-62.617	-61.339	0.026067	0	2.3953	4.3055
-2.4129	2.3742	-62.775	-61.418	0.025396	0	2.3954	4.3112
-2.4127	2.3744	-62.522	-61.541	0.024738	0	2.3953	4.3169
-2.4125	2.3746	-62.559	-61.29	0.024096	0	2.3951	4.3226
-2.4123	2.3748	-62.461	-61.342	0.023468	0	2.3948	4.3281
-2.4121	2.375	-62.565	-61.638	0.022854	0	2.3835	4.3336
-2.4119	2.3752	-62.51	-61.513	0.022254	0	2.3832	4.339
-2.4117	2.3754	-62.464	-61.547	0.021667	0	2.3827	4.3443
-2.4115	2.3756	-62.589	-61.489	0.021094	0	2.3822	4.3495
-2.4113	2.3758	-62.665	-61.568	0.020534	0	2.3815	4.3547
-2.4111	2.376	-62.668	-61.669	0.019987	0	2.3806	4.3597
-2.4109	2.3762	-62.488	-61.544	0.019453	0	2.3796	4.3647
-2.4107	2.3764	-62.464	-61.611	0.018931	0	2.3785	4.3696
-2.4105	2.3766	-62.397	-61.635	0.018421	0	2.3772	4.3745
-2.4103	2.3768	-62.318	-61.687	0.017923	0	2.3758	4.3792
-2.4101	2.377	-62.293	-61.577	0.017437	0	2.3743	4.3839
-2.4099	2.3772	-62.25	-61.714	0.016962	0	2.3726	4.3885
-2.4097	2.3774	-61.954	-61.83	0.016498	0	2.3708	4.3856
-2.4095	2.3776	-62.116	-61.827	0.016046	0	2.3689	4.3903
-2.4093	2.3778	-62.266	-61.73	0.015605	0	2.3668	4.3948
-2.4091	2.378	-62.342	-61.779	0.015174	0	2.3646	4.3993
-2.4089	2.3782	-62.458	-61.632	0.014753	0	2.3623	4.4037
-2.4087	2.3784	-62.415	-61.727	0.014343	0	2.3598	4.408
-2.4085	2.3786	-62.418	-61.785	0.013943	0	2.3572	4.4122
-2.4083	2.3788	-62.449	-61.669	0.013553	0	2.3545	4.4163
-2.4081	2.379	-62.54	-61.797	0.013172	0	2.3517	4.4203
-2.4079	2.3791	-62.623	-61.812	0.0128	0	2.3487	4.4243
-2.4077	2.3793	-62.702	-61.666	0.012438	0	2.3456	4.4281
-2.4075	2.3795	-62.614	-61.73	0.012085	0	2.3424	4.4319
-2.4073	2.3797	-62.58	-61.614	0.011741	0	2.3391	4.4356
-2.4071	2.3799	-62.498	-61.678	0.011406	0	2.3356	4.4392
-2.4069	2.3801	-62.54	-61.867	0.011079	0	2.332	4.4426
-2.4067	2.3803	-62.626	-61.815	0.01076	0	2.3396	4.4399
-2.4065	2.3805	-62.644	-61.8	0.010449	0	2.3361	4.4434
-2.4063	2.3807	-62.751	-61.852	0.010147	0	2.3326	4.4468
-2.4061	2.3809	-62.745	-61.858	0.0098519	0	2.3289	4.4501
-2.4059	2.3811	-62.794	-61.891	0.0095647	0	2.3251	4.4533
-2.4057	2.3813	-62.952	-61.87	0.0092849	0	2.3212	4.4564
-2.4055	2.3815	-63.154	-62.059	0.0090124	0	2.3172	4.4595
-2.4053	2.3817	-63.022	-62.041	0.008747	0	2.3131	4.4624
-2.4051	2.3819	-63.218	-61.992	0.0084887	0	2.3089	4.4652
-2.4049	2.3821	-63.141	-61.937	0.0082371	0	2.3046	4.468
-2.4047	2.3823	-63.117	-62.105	0.0079922	0	2.3002	4.4706
-2.4045	2.3825	-63.172	-62.169	0.0077538	0	2.2957	4.4732
-2.4043	2.3827	-63.282	-62.017	0.0075218	0	2.2912	4.4756
-2.4041	2.3829	-63.483	-62.23	0.0072959	0	2.2865	4.478
-2.4039	2.3831	-63.511	-61.943	0.0070762	0	2.2817	4.4802
-2.4037	2.3833	-63.468	-61.635	0.0068624	0	2.2769	4.4824
-2.4035	2.3835	-63.441	-61.599	0.0066544	0	2.2719	4.4845
-2.4033	2.3837	-63.654	-61.431	0.0064521	0	2.2669	4.4864
-2.4031	2.3839	-63.73	-61.391	0.0062553	0	2.2618	4.4883
-2.4029	2.3841	-63.599	-61.153	0.0060639	0	2.2566	4.4901
-2.4027	2.3843	-63.773	-61.177	0.0058777	0	2.2514	4.4918
-2.4025	2.3845	-63.804	-61.183	0.0056968	0	2.246	4.4934
-2.4023	2.3847	-63.941	-61.4	0.0055208	0	2.2406	4.4948
-2.4021	2.3849	-64.1	-61.241	0.0053497	0	2.2351	4.4962
-2.4019	2.3851	-64.048	-61.425	0.0051835	0	2.2295	4.4975
-2.4017	2.3853	-64.121	-61.248	0.0050219	0	2.2238	4.4987
-2.4015	2.3855	-64.194	-61.272	0.0048648	0	2.2181	4.4998
-2.4013	2.3857	-64.292	-61.397	0.0047122	0	2.2123	4.5007
-2.4011	2.3859	-64.341	-61.397	0.004564	0	2.2064	4.5016
-2.4009	2.3861	-64.329	-61.586	0.0044199	0	2.2117	4.5024
-2.4007	2.3863	-64.246	-61.391	0.00428	0	2.2061	4.5031
-2.4005	2.3865	-64.219	-61.232	0.0041441	0	2.2004	4.5037
-2.4003	2.3867	-64.31	-61.26	0.0040121	0	2.1946	4.5041
-2.4001	2.3869	-64.277	-61.086	0.0038839	0	2.1887	4.5045
-2.3999	2.387	-64.359	-61.055	0.0037595	0	2.1829	4.5048
-2.3997	2.3872	-64.341	-61.013	0.0036387	0	2.1769	4.5049
-2.3995	2.3874	-64.295	-60.878	0.0035214	0	2.1709	4.505
-2.3993	2.3876	-64.234	-60.903	0.0034075	0	2.1649	4.505
-2.3991	2.3878	-64.359	-60.842	0.003297	0	2.1588	4.5048
-2.3989	2.388	-64.289	-60.802	0.0031898	0	2.1527	4.5046
-2.3987	2.3882	-64.445	-60.857	0.0030858	0	2.1466	4.5042
-2.3985	2.3884	-64.359	-60.918	0.0029848	0	2.1404	4.5037
-2.3983	2.3886	-64.609	-60.979	0.0028869	0	2.1341	4.5032
-2.3981	2.3888	-64.435	-60.924	0.0027919	0	2.1278	4.5025
-2.3979	2.389	-64.35	-61.058	0.0026998	0	2.1215	4.5017
-2.3977	2.3892	-64.493	-60.903	0.0026104	0	2.1152	4.5008
-2.3975	2.3894	-64.655	-60.936	0.0025238	0	2.1088	4.4998
-2.3973	2.3896	-64.402	-60.903	0.0024397	0	2.1024	4.4987
-2.3971	2.3898	-64.393	-60.686	0.0023583	0	2.096	4.4975
-2.3969	2.39	-64.5	-60.771	0.0022793	0	2.0895	4.4962
-2.3967	2.3902	-64.438	-60.695	0.0022028	0	2.083	4.4947
-2.3965	2.3904	-64.451	-60.656	0.0021286	0	2.0765	4.4932
-2.3963	2.3906	-64.411	-60.634	0.0020567	0	2.07	4.4915
-2.3961	2.3908	-64.411	-60.536	0.0019871	0	2.0635	4.4898
-2.3959	2.391	-64.423	-60.326	0.0019196	0	2.0569	4.4879
-2.3957	2.3912	-64.411	-59.816	0.0018542	0	2.0503	4.4859
-2.3955	2.3914	-64.451	-59.291	0.0017909	0	2.0437	4.4838
-2.3953	2.3916	-64.603	-59.218	0.0017296	0	2.0371	4.4816
-2.3951	2.3918	-64.606	-58.998	0.0016702	0	2.0305	4.4792
-2.3949	2.392	-64.481	-58.98	0.0016126	0	2.0239	4.4768
-2.3947	2.3922	-64.411	-59.172	0.0015569	0	2.0285	4.4742
-2.3945	2.3924	-64.716	-59.197	0.001503	0	2.0222	4.4716
-2.3944	2.3926	-64.457	-59.291	0.0014508	0	2.0159	4.4688
-2.3942	2.3928	-64.597	-59.478	0.0014003	0	2.0096	4.4659
-2.394	2.393	-64.661	-59.404	0.0013514	0	2.0033	4.4629
-2.3938	2.3932	-64.802	-59.386	0.0013041	0	1.997	4.4597
-2.3936	2.3934	-64.609	-59.618	0.0012583	0	1.9908	4.4565
-2.3934	2.3936	-64.551	-59.581	0.001214	0	1.9845	4.4531
-2.3932	2.3938	-64.673	-59.661	0.0011711	0	1.9783	4.4496
-2.393	2.394	-64.673	-59.85	0.0011297	0	1.972	4.446
-2.3928	2.3942	-64.744	-59.917	0.0010896	0	1.9658	4.4423
-2.3926	2.3944	-64.792	-60.268	0.0010508	0	1.9597	4.4384
-2.3924	2.3946	-64.762	-60.054	0.0010133	0	1.9535	4.4345
-2.3922	2.3948	-64.46	-60.344	0.00097705	0	1.9474	4.4304
-2.392	2.395	-64.469	-60.323	0.000942	0	1.9413	4.4262
-2.3918	2.3952	-64.402	-60.186	0.00090811	0	1.9352	4.4219
-2.3916	2.3954	-64.539	-60.271	0.00087535	0	1.9291	4.4175
-2.3914	2.3956	-64.673	-60.259	0.0008437	0	1.9231	4.4129
-2.3912	2.3958	-64.799	-60.579	0.00081311	0	1.9171	4.4082
-2.391	2.396	-64.713	-60.479	0.00078354	0	1.9112	4.4034
-2.3908	2.3962	-64.637	-60.515	0.00075498	0	1.9053	4.3985
-2.3906	2.3964	-64.808	-60.564	0.00072739	0	1.8994	4.3935
-2.3904	2.3966	-64.67	-60.314	0.00070074	0	1.8936	4.3883
-2.3902	2.3968	-64.542	-60.302	0.00067499	0	1.8878	4.383
-2.39	2.397	-64.359	-59.984	0.00065013	0	1.882	4.3776
-2.3898	2.3972	-64.289	-60.005	0.00062612	0	1.8763	4.3721
-2.3896	2.3974	-64.286	-59.862	0.00060294	0	1.8707	4.3665
-2.3894	2.3976	-64.231	-59.92	0.00058056	0	1.8651	4.3607
-2.3892	2.3978	-64.231	-60.033	0.00055895	0	1.8595	4.3548
-2.389	2.398	-64.265	-60.14	0.0005381	0	1.854	4.3415
-2.3888	2.3982	-64.319	-60.292	0.00051797	0	1.8486	4.3355
-2.3886	2.3984	-64.341	-60.219	0.00049854	0	1.8432	4.3295
-2.3884	2.3986	-64.46	-60.356	0.0004798	0	1.8379	4.3233
-2.3882	2.3988	-64.588	-60.161	0.00046171	0	1.8326	4.317
-2.388	2.399	-64.515	-60.164	0.00044426	0	1.8274	4.3106
-2.3878	2.3992	-64.512	-60.216	0.00042743	0	1.8223	4.304
-2.3876	2.3994	-64.344	-60.344	0.0004112	0	1.8172	4.2973
-2.3874	2.3996	-64.457	-60.338	0.00039554	0	1.8122	4.2905
-2.3872	2.3998	-64.402	-60.381	0.00038044	0	1.8073	4.2836
-2.387	2.4	-64.435	-60.433	0.00036588	0	1.8024	4.2765
-2.3868	2.4002	-64.261	-60.421	0.00035185	0	1.7976	4.2693
-2.3866	2.4004	-64.31	-60.121	0.00033832	0	1.7929	4.262
-2.3864	2.4006	-64.203	-60.091	0.00032527	0	1.7883	4.2545
-2.3862	2.4008	-64.661	-60.118	0.0003127	0	1.7837	4.2469
-2.386	2.401	-64.475	-59.972	0.00030059	0	1.7793	4.2392
-2.3858	2.4012	-64.35	-59.996	0.00028891	0	1.7749	4.2314
-2.3856	2.4014	-64.301	-60.024	0.00027766	0	1.7706	4.2234
-2.3854	2.4016	-64.402	-60.155	0	0	1.7663	4.2154
-2.3852	2.4018	-64.405	-60.033	0	0	1.7622	4.2071
-2.385	2.402	-64.438	-59.926	0	0	1.7582	4.1988
-2.3848	2.4022	-64.5	-59.658	0	0	1.7542	4.1904
-2.3846	2.4024	-64.597	-59.493	0	0	1.7503	4.1818
-2.3844	2.4026	-64.582	-59.42	0	0	1.7466	4.1731
-2.3842	2.4028	-64.561	-59.496	0	0	1.7429	4.1642
-2.384	2.403	-64.454	-59.764	0	0	1.7393	4.1553
-2.3838	2.4032	-64.319	-59.89	0	0	1.7359	4.1462
-2.3836	2.4034	-64.408	-59.786	0	0	1.7325	4.137
-2.3834	2.4036	-64.313	-59.746	0	0	1.7292	4.1277
-2.3832	2.4038	-64.286	-59.694	0	0	1.726	4.1182
-2.383	2.404	-64.045	-59.658	0	0	1.723	4.1087
-2.3828	2.4042	-64.091	-59.423	0	0	1.72	4.099
-2.3826	2.4044	-64.091	-59.386	0	0	1.7172	4.0892
-2.3824	2.4046	-64.295	-59.117	0	0	1.7144	4.0792
-2.3822	2.4048	-64.359	-58.983	0	0	1.7118	4.0692
-2.382	2.405	-64.506	-58.77	0	0	1.7093	4.059
-2.3818	2.4052	-64.484	-58.562	0	0	1.7069	4.0488
-2.3816	2.4054	-64.472	-58.513	0	0	1.7046	4.0384
-2.3814	2.4056	-64.478	-58.632	0	0	1.7024	4.0278
-2.3812	2.4058	-64.677	-58.589	0	0	1.7004	4.0172
-2.381	2.406	-64.619	-58.669	0	0	1.6985	4.0065
-2.3808	2.4062	-64.585	-58.614	0	0	1.6966	3.9956
-2.3806	2.4064	-64.771	-58.675	0	0	1.695	3.9846
-2.3804	2.4066	-64.734	-58.614	0	0	1.6934	3.9735
-2.3802	2.4068	-64.719	-58.715	0	0	1.692	3.9623
-2.38	2.407	-64.734	-58.599	0	0	1.6907	3.951
-2.3798	2.4072	-64.625	-58.818	0	0	1.6895	3.9396
-2.3796	2.4074	-64.481	-59.114	0	0	1.6885	3.928
-2.3794	2.4076	-64.286	-58.901	0	0	1.6875	3.9164
-2.3792	2.4078	-64.35	-58.968	0	0	1.6868	3.9046
-2.379	2.408	-64.402	-59.166	0	0	1.6861	3.8927
-2.3788	2.4082	-64.341	-59.212	0	0	1.6856	3.8808
-2.3786	2.4084	-64.46	-59.142	0	0	1.6852	3.8687
-2.3784	2.4086	-64.365	-59.429	0	0	1.685	3.8565
-2.3782	2.4088	-64.396	-59.438	0	0	1.6849	3.8442
-2.378	2.409	-64.46	-59.609	0	0	1.6849	3.8318
-2.3778	2.4092	-64.475	-59.609	0	0	1.6851	3.8193
-2.3776	2.4094	-64.503	-59.478	0	0	1.6854	3.8067
-2.3774	2.4097	-64.387	-59.404	0	0	1.6858	3.7939
-2.3772	2.4099	-64.341	-59.655	0	0	1.6864	3.7811
-2.377	2.4101	-64.335	-59.844	0	0	1.6872	3.7682
-2.3768	2.4103	-64.469	-59.731	0	0	1.6881	3.7552
-2.3766	2.4105	-64.518	-59.633	0	0	1.6891	3.7421
-2.3764	2.4107	-64.371	-59.957	0	0	1.6903	3.7289
-2.3762	2.4109	-64.463	-60.146	0	0	1.6916	3.7156
-2.376	2.4111	-64.399	-60.042	0	0	1.6931	3.7021
-2.3758	2.4113	-64.38	-60.005	0	0	1.6947	3.6886
-2.3756	2.4115	-64.35	-60.045	0	0	1.6965	3.6751
-2.3754	2.4117	-64.448	-60.027	0	0	1.6984	3.6614
-2.3752	2.4119	-64.49	-60.17	0	0	1.7004	3.6476
-2.375	2.4121	-64.28	-59.929	0.00026768	0	1.7026	3.6337
-2.3748	2.4123	-64.365	-59.966	0.00027855	0	1.705	3.6198
-2.3746	2.4125	-64.408	-60.036	0.00028983	0	1.7075	3.6057
-2.3744	2.4127	-64.484	-59.987	0.00030154	0	1.7102	3.5916
-2.3742	2.4129	-64.429	-59.969	0.00031369	0	1.713	3.5773
-2.374	2.4131	-64.609	-60.21	0.0003263	0	1.716	3.563
-2.3738	2.4133	-64.38	-60.106	0.00033938	0	1.7191	3.5486
-2.3736	2.4135	-64.533	-60.076	0.00035295	0	1.7224	3.5341
-2.3734	2.4137	-64.335	-60.002	0.00036703	0	1.7258	3.5196
-2.3732	2.4139	-64.445	-60.164	0.00038163	0	1.7294	3.5049
-2.373	2.4141	-64.286	-60.176	0.00039677	0	1.7331	3.4902
-2.3728	2.4143	-64.268	-60.32	0.00041248	0	1.737	3.4754
-2.3726	2.4145	-64.124	-60.112	0.00042876	0	1.7411	3.4605
-2.3724	2.4147	-63.926	-60.182	0.00044564	0	1.7453	3.4455
-2.3722	2.4149	-63.724	-59.944	0.00046313	0	1.7496	3.4305
-2.372	2.4151	-63.672	-60.115	0.00048127	0	1.7541	3.4154
-2.3718	2.4153	-63.654	-59.862	0.00050007	0	1.7587	3.4002
-2.3716	2.4155	-63.688	-59.761	0.00051955	0	1.7635	3.3849
-2.3714	2.4157	-63.63	-59.883	0.00053974	0.00051476	1.7685	3.3696
-2.3712	2.4159	-63.679	-59.832	0.00056065	0.00053567	1.7736	3.3542
-2.371	2.4161	-63.73	-59.987	0.00058232	0.00055736	1.7788	3.3387
-2.3708	2.4163	-63.743	-59.938	0.00060476	0.00057988	1.7842	3.3232
-2.3706	2.4165	-63.657	-60.027	0.00062801	0.00060325	1.7898	3.3076
-2.3704	2.4167	-63.431	-60.054	0.00065209	0.0006275	1.7955	3.2919
-2.3702	2.4169	-63.596	-60.14	0.00067702	0.00065266	1.8013	3.2761
-2.37	2.4171	-63.697	-60.121	0.00070284	0.00067875	1.8073	3.2531
-2.3698	2.4173	-63.651	-60.146	0.00072956	0.00070583	1.8135	3.2374
-2.3696	2.4176	-63.407	-60.359	0.00075723	0.0007339	1.8198	3.2217
-2.3694	2.4178	-63.663	-60.051	0.00078587	0.00076302	1.8262	3.2059
-2.3692	2.418	-63.788	-60.256	0.00081551	0.00079322	1.8328	3.1901
-2.369	2.4182	-63.758	-60.256	0.00084619	0.00082453	1.8395	3.1742
-2.3688	2.4184	-63.74	-60.411	0.00087793	0.00085699	1.8463	3.1582
-2.3686	2.4186	-63.816	-60.53	0.00091078	0.0014158	1.8533	3.1422
-2.3684	2.4188	-63.993	-60.628	0.00094476	0.0014719	1.8605	3.1261
-2.3682	2.419	-63.883	-60.594	0.00097991	0.0015302	1.8677	3.1099
-2.368	2.4192	-63.697	-60.579	0.0010163	0.0015906	1.8751	3.0937
-2.3678	2.4194	-63.779	-60.619	0.0010539	0.0016532	1.8827	3.0774
-2.3676	2.4196	-63.709	-60.576	0.0010927	0.0017181	1.8904	3.0611
-2.3674	2.4198	-63.59	-60.753	0.0011329	0.0017854	1.8982	3.0447
-2.3672	2.42	-63.425	-60.726	0.0011745	0.0018552	1.9061	3.0283
-2.3671	2.4202	-63.19	-60.662	0.0012175	0.0019275	1.9142	3.0118
-2.3669	2.4204	-62.781	-60.799	0.0012619	0.0020023	1.9224	2.9953
-2.3667	2.4206	-62.8	-60.805	0.0013078	0.0020799	1.9307	2.9787
-2.3665	2.4208	-62.861	-60.894	0.0013553	0.0021603	1.9391	2.9621
-2.3663	2.421	-63.05	-61.022	0.0014043	0.0022436	1.9477	2.9455
-2.3661	2.4212	-63.196	-60.903	0.0014549	0.0023299	1.9564	2.9288
-2.3659	2.4214	-63.065	-60.72	0.0015073	0.0024192	1.9652	2.912
-2.3657	2.4216	-63.236	-60.997	0.0015613	0.0025117	1.9741	2.8952
-2.3655	2.4218	-63.187	-61.235	0.0016172	0.0026075	1.9832	2.8784
-2.3653	2.422	-63.257	-61.006	0.0016748	0.0027067	1.9923	2.8615
-2.3651	2.4222	-63.331	-60.906	0.0017344	0.0028094	2.0016	2.8446
-2.3649	2.4224	-63.407	-60.753	0.0017959	0.0029157	2.0109	2.8277
-2.3647	2.4226	-63.346	-60.689	0.0018594	0.0030257	2.0204	2.8107
-2.3645	2.4228	-63.428	-60.512	0.0019249	0.0031395	2.03	2.7937
-2.3643	2.4231	-63.538	-60.308	0.0019926	0.0032573	2.0397	2.7767
-2.3641	2.4233	-63.557	-60.253	0.0020624	0.0033792	2.0494	2.7596
-2.3639	2.4235	-63.532	-60.378	0.0021345	0.0035053	2.0593	2.7426
-2.3637	2.4237	-63.55	-60.408	0.0022088	0.0036358	2.0693	2.7254
-2.3635	2.4239	-63.697	-60.585	0.0022856	0.0037707	2.0793	2.7083
-2.3633	2.4241	-63.553	-60.353	0.0023647	0.0039103	2.0895	2.6911
-2.3631	2.4243	-63.337	-60.265	0.0024464	0.0040546	2.0997	2.6739
-2.3629	2.4245	-63.425	-60.353	0.0025306	0.0042038	2.11	2.6567
-2.3627	2.4247	-63.581	-60.463	0.0026175	0.0043581	2.1204	2.647
-2.3625	2.4249	-63.346	-60.363	0.002707	0.0045176	2.1199	2.63
-2.3623	2.4251	-63.114	-60.359	0.0027994	0.0046825	2.1307	2.613
-2.3621	2.4253	-62.98	-60.369	0.0028946	0.0048529	2.1416	2.5959
-2.3619	2.4255	-62.894	-60.359	0.0029928	0.005029	2.1526	2.5789
-2.3617	2.4257	-63.05	-60.359	0.003094	0.0052111	2.1637	2.5618
-2.3615	2.4259	-62.9	-60.533	0.0031983	0.0053991	2.1748	2.5448
-2.3613	2.4261	-63.007	-60.515	0.0033058	0.0055934	2.1859	2.5277
-2.3611	2.4263	-62.885	-60.53	0.0034165	0.0057941	2.1971	2.5106
-2.3609	2.4265	-62.873	-60.573	0.0035306	0.0060014	2.2084	2.4936
-2.3607	2.4267	-62.754	-60.68	0.0036482	0.0062156	2.2196	2.4765
-2.3605	2.4269	-62.812	-60.695	0.0037693	0.0064367	2.231	2.4522
-2.3603	2.4271	-63.029	-60.994	0.0038941	0.006665	2.2423	2.4353
-2.3601	2.4273	-63.166	-60.924	0.0040225	0.0069008	2.2537	2.4185
-2.3599	2.4276	-62.906	-60.72	0.0041548	0.0071442	2.2651	2.4016
-2.3597	2.4278	-62.913	-60.82	0.004291	0.0073954	2.2766	2.3775
-2.3595	2.428	-62.977	-60.765	0.0044313	0.0076547	2.2881	2.3608
-2.3593	2.4282	-62.946	-60.918	0.0045757	0.0079224	2.2995	2.3442
-2.3591	2.4284	-62.974	-60.912	0.0047243	0.0081985	2.3111	2.3276
-2.3589	2.4286	-63.08	-61.049	0.0048772	0.0084835	2.3226	2.3037
-2.3587	2.4288	-62.867	-60.909	0.0050346	0.0087775	2.3341	2.2873
-2.3585	2.429	-62.668	-60.884	0.0051966	0.0090808	2.3456	2.2709
-2.3583	2.4292	-62.729	-60.335	0.0053632	0.0093936	2.3572	2.2545
-2.3581	2.4294	-62.681	-60.277	0.0055347	0.0097163	2.3687	2.2382
-2.3579	2.4296	-62.641	-60.265	0.005711	0.010049	2.3802	2.2218
-2.3577	2.4298	-62.705	-60.207	0.0058924	0.010392	2.3918	2.2054
-2.3575	2.43	-62.638	-60.186	0.006079	0.010746	2.4033	2.189
-2.3573	2.4302	-62.546	-60.356	0.0062708	0.011111	2.4148	2.1727
-2.3571	2.4304	-62.522	-60.118	0.0064681	0.011487	2.4262	2.1563
-2.3569	2.4306	-62.601	-60.234	0.0066708	0.011874	2.4377	2.14
-2.3567	2.4308	-62.458	-60.103	0.0068793	0.012273	2.4491	2.1237
-2.3565	2.431	-62.44	-60.222	0.0070936	0.012685	2.4605	2.1074
-2.3563	2.4312	-62.522	-60.256	0.0073138	0.013109	2.4719	2.0912
-2.3561	2.4315	-62.412	-60.259	0.0075401	0.013546	2.4832	2.0749
-2.3559	2.4317	-62.15	-60.417	0.0077726	0.013996	2.4945	2.0587
-2.3557	2.4319	-61.912	-60.527	0.0080115	0.01446	2.5057	2.0425
-2.3555	2.4321	-61.902	-60.482	0.008257	0.014937	2.5169	2.0264
-2.3553	2.4323	-61.881	-60.604	0.0085091	0.015429	2.517	2.0102
-2.3551	2.4325	-61.896	-60.756	0.008768	0.015935	2.5284	1.9941
-2.3549	2.4327	-61.823	-60.555	0.0090339	0.016456	2.5397	1.9781
-2.3547	2.4329	-61.729	-60.793	0.009307	0.016993	2.551	1.9621
-2.3545	2.4331	-61.915	-60.921	0.0095874	0.017546	2.5622	1.9461
-2.3543	2.4333	-61.976	-60.875	0.0098752	0.018114	2.5733	1.9301
-2.3541	2.4335	-61.799	-60.82	0.010171	0.018699	2.5843	1.9142
-2.3539	2.4337	-61.863	-61.208	0.010474	0.019302	2.5953	1.8983
-2.3537	2.4339	-61.75	-61.226	0.010785	0.019921	2.6061	1.8825
-2.3535	2.4341	-61.793	-61.171	0.011105	0.020559	2.6168	1.8667
-2.3533	2.4343	-61.786	-61.241	0.011432	0.021214	2.6275	1.851
-2.3531	2.4345	-61.576	-61.449	0.011768	0.021889	2.6381	1.8353
-2.3529	2.4347	-61.667	-61.357	0.012113	0.022583	2.6485	1.8197
-2.3527	2.435	-61.497	-61.489	0.012467	0.023296	2.6588	1.8041
-2.3525	2.4352	-61.304	-61.589	0.01283	0.02403	2.6691	1.7886
-2.3523	2.4354	-61.295	-61.534	0.013202	0.024784	2.6792	1.7731
-2.3521	2.4356	-61.353	-61.678	0.013583	0.025559	2.6892	1.7577
-2.3519	2.4358	-61.307	-61.574	0.013975	0.026356	2.699	1.7423
-2.3517	2.436	-61.194	-61.556	0.014376	0.027176	2.7088	1.727
-2.3515	2.4362	-61.378	-61.696	0.014787	0.028018	2.7184	1.7118
-2.3513	2.4364	-61.503	-61.852	0.015208	0.028883	2.7279	1.6966
-2.3511	2.4366	-61.381	-61.629	0.015639	0.029772	2.7372	1.6815
-2.3509	2.4368	-61.481	-61.629	0.016082	0.030685	2.7464	1.6664
-2.3507	2.437	-61.597	-61.742	0.016535	0.031623	2.7555	1.6515
-2.3505	2.4372	-61.741	-61.779	0.017272	0.032587	2.7644	1.6365
-2.3503	2.4374	-61.686	-61.623	0.017759	0.033576	2.7732	1.6217
-2.3501	2.4376	-61.735	-61.83	0.018258	0.034592	2.7818	1.6069
-2.3499	2.4378	-61.979	-61.879	0.018769	0.035636	2.7903	1.5922
-2.3497	2.438	-61.881	-61.467	0.019292	0.036707	2.7986	1.5776
-2.3495	2.4383	-62.003	-61.489	0.019828	0.037807	2.8067	1.5631
-2.3493	2.4385	-62.324	-61.586	0.020377	0.038936	2.8147	1.5486
-2.3491	2.4387	-62.311	-61.534	0.020939	0.040095	2.8225	1.5342
-2.3489	2.4389	-62.229	-61.55	0.021514	0.041284	2.8301	1.5199
-2.3487	2.4391	-62.263	-61.342	0.022103	0.042504	2.8376	1.5057
-2.3485	2.4393	-62.214	-61.501	0.022706	0.043756	2.8448	1.4916
-2.3483	2.4395	-62.128	-61.58	0.023323	0.04504	2.8519	1.4775
-2.3481	2.4397	-62.128	-61.736	0.023955	0.046357	2.8589	1.471
-2.3479	2.4399	-61.927	-61.791	0.024601	0.047709	2.8656	1.4574
-2.3477	2.4401	-61.68	-61.837	0.025263	0.049094	2.8721	1.4438
-2.3475	2.4403	-61.365	-61.748	0.025939	0.050515	2.8785	1.4303
-2.3473	2.4405	-61.225	-61.766	0.026632	0.051972	2.8846	1.417
-2.3471	2.4407	-61.173	-62.023	0.02734	0.053466	2.8906	1.4037
-2.3469	2.4409	-61.057	-61.931	0.028064	0.054997	2.8964	1.3905
-2.3467	2.4412	-60.883	-61.785	0.028804	0.056567	2.913	1.3774
-2.3465	2.4414	-60.752	-61.962	0.029562	0.058175	2.9187	1.3645
-2.3463	2.4416	-60.877	-61.962	0.030336	0.059824	2.9242	1.3516
-2.3461	2.4418	-60.847	-61.882	0.031127	0.061513	2.9295	1.3388
-2.3459	2.442	-60.822	-62.023	0.031937	0.063243	2.9346	1.3262
-2.3457	2.4422	-60.737	-61.855	0.032764	0.065016	2.9395	1.3136
-2.3455	2.4424	-60.999	-61.983	0.033609	0.066831	2.9441	1.3012
-2.3453	2.4426	-60.786	-62.184	0.034472	0.068691	2.9486	1.2889
-2.3451	2.4428	-60.7	-62.12	0.035355	0.070596	2.9529	1.2766
-2.3449	2.443	-60.645	-62.111	0.036256	0.072546	2.9569	1.2645
-2.3447	2.4432	-60.544	-62.096	0.037177	0.074542	2.9608	1.2525
-2.3445	2.4434	-60.593	-61.974	0.038118	0.076586	2.9644	1.2407
-2.3443	2.4436	-60.547	-62.12	0.039079	0.078678	2.9678	1.2289
-2.3441	2.4438	-60.224	-62.038	0.04006	0.08082	2.971	1.2173
-2.3439	2.4441	-60.248	-62.072	0.041062	0.083011	2.9739	1.2057
-2.3437	2.4443	-60.102	-62.279	0.042085	0.085254	2.9767	1.1943
-2.3435	2.4445	-59.974	-62.361	0.043129	0.087548	2.9792	1.183
-2.3433	2.4447	-59.995	-62.377	0.044195	0.089895	2.9815	1.1719
-2.3431	2.4449	-59.931	-62.319	0.045283	0.092296	2.9836	1.1683
-2.3429	2.4451	-59.647	-62.221	0.046393	0.094752	2.9855	1.1576
-2.3427	2.4453	-59.717	-62.258	0.047793	0.097264	2.9871	1.1471
-2.3425	2.4455	-59.76	-62.233	0.04896	0.099832	2.9885	1.1366
-2.3423	2.4457	-59.604	-62.096	0.050151	0.10246	2.9897	1.1263
-2.3421	2.4459	-59.623	-62.126	0.051365	0.10514	2.9906	1.1162
-2.3419	2.4461	-59.785	-61.974	0.052604	0.10789	2.9914	1.1061
-2.3417	2.4463	-59.617	-61.858	0.053868	0.11069	2.9918	1.0962
-2.3415	2.4466	-59.843	-61.946	0.055157	0.11356	2.9921	1.0865
-2.3413	2.4468	-59.809	-62.05	0.056472	0.11649	2.9921	1.0768
-2.3411	2.447	-59.91	-61.986	0.057813	0.11948	2.992	1.0674
-2.3409	2.4472	-59.73	-62.111	0.05918	0.12254	2.9915	1.058
-2.3407	2.4474	-59.928	-61.974	0.060573	0.12566	2.9909	1.0488
-2.3405	2.4476	-59.757	-62.13	0.061994	0.12885	2.99	1.0397
-2.3403	2.4478	-59.595	-62.117	0.063441	0.13211	2.9889	1.0308
-2.3401	2.448	-59.659	-62.184	0.064917	0.13544	2.9875	1.022
-2.3399	2.4482	-59.559	-62.27	0.066421	0.13884	2.9859	1.0134
-2.3397	2.4484	-59.592	-62.093	0.067953	0.14231	2.9841	1.0049
-2.3396	2.4486	-59.522	-62.001	0.069514	0.14585	2.9821	0.99656
-2.3394	2.4488	-59.528	-62.148	0.071104	0.14946	2.9798	0.98836
-2.3392	2.4491	-59.336	-61.946	0.072724	0.15315	2.9773	0.98031
-2.339	2.4493	-59.211	-62.014	0.074374	0.15692	2.9746	0.97241
-2.3388	2.4495	-58.948	-62.108	0.076054	0.16076	2.9717	0.96465
-2.3386	2.4497	-58.582	-62.053	0.077766	0.16468	2.9685	0.95704
-2.3384	2.4499	-51.292	-61.788	0.079508	0.16867	2.9651	0.94959
-2.3382	2.4501	-42.213	-61.949	0.081281	0.17275	2.9614	0.94228
-2.338	2.4503	-38.639	-62.053	0.083087	0.17691	2.9576	0.93513
-2.3378	2.4505	-39.908	-62.059	0.084925	0.18115	2.9535	0.92812
-2.3376	2.4507	-44.468	-61.962	0.086795	0.18548	2.9492	0.92127
-2.3374	2.4509	-48.667	-62.105	0.088698	0.18988	2.9447	0.91457
-2.3372	2.4511	-51.057	-62.181	0.090635	0.19438	2.94	0.89451
-2.337	2.4513	-52.668	-62.2	0.092605	0.19896	2.935	0.88852
-2.3368	2.4516	-53.687	-62.099	0.09461	0.20363	2.9299	0.88267
-2.3366	2.4518	-54.706	-62.072	0.096649	0.20839	2.9245	0.87697
-2.3364	2.452	-55.491	-62.023	0.098723	0.21324	2.9189	0.87141
-2.3362	2.4522	-56.275	-62.227	0.10083	0.21817	2.9242	0.866
-2.336	2.4524	-56.669	-62.02	0.10298	0.22321	2.9185	0.86074
-2.3358	2.4526	-57.49	-61.986	0.10516	0.22833	2.9126	0.85562
-2.3356	2.4528	-58.036	-61.837	0.10738	0.23355	2.9065	0.85065
-2.3354	2.453	-58.442	-61.898	0.10963	0.23887	2.9003	0.84583
-2.3352	2.4532	-58.997	-61.806	0.11192	0.24428	2.8938	0.84116
-2.335	2.4534	-59.196	-61.916	0.11425	0.24979	2.8872	0.83663
-2.3348	2.4536	-59.568	-61.812	0.11661	0.2554	2.8803	0.83226
-2.3346	2.4539	-59.901	-62.072	0.11902	0.26111	2.8733	0.82804
-2.3344	2.4541	-60.221	-62.224	0.12146	0.26692	2.8661	0.82396
-2.3342	2.4543	-60.395	-62.017	0.12394	0.27283	2.8587	0.82004
-2.334	2.4545	-60.66	-62.05	0.12646	0.27885	2.8511	0.81627
-2.3338	2.4547	-60.874	-62.145	0.12903	0.28497	2.8434	0.81265
-2.3336	2.4549	-61.133	-62.062	0.13163	0.2912	2.8355	0.80918
-2.3334	2.4551	-61.436	-62.075	0.13427	0.29753	2.8274	0.80587
-2.3332	2.4553	-61.78	-62.014	0.13695	0.30397	2.8191	0.81011
-2.333	2.4555	-61.939	-62.151	0.13967	0.31052	2.8107	0.80732
-2.3328	2.4557	-62.336	-62.014	0.14243	0.31718	2.8022	0.8047
-2.3326	2.456	-62.626	-61.946	0.14524	0.32395	2.7934	0.80223
-2.3324	2.4562	-62.656	-61.861	0.14809	0.33083	2.7846	0.79992
-2.3322	2.4564	-62.812	-61.983	0.15098	0.33783	2.7755	0.79777
-2.332	2.4566	-62.958	-61.876	0.15391	0.34494	2.7663	0.79577
-2.3318	2.4568	-63.105	-61.748	0.15688	0.35216	2.757	0.79394
-2.3316	2.457	-63.227	-61.937	0.1599	0.3595	2.7475	0.78504
-2.3314	2.4572	-63.117	-62.007	0.16296	0.36695	2.7379	0.78375
-2.3312	2.4574	-63.206	-61.974	0.16607	0.37453	2.7282	0.7826
-2.331	2.4576	-63.38	-61.797	0.16922	0.38222	2.7183	0.78161
-2.3308	2.4578	-63.514	-61.751	0.17241	0.39003	2.7083	0.78078
-2.3306	2.4581	-63.474	-61.62	0.17565	0.39796	2.6982	0.7801
-2.3304	2.4583	-63.56	-61.65	0.17893	0.40602	2.688	0.77957
-2.3302	2.4585	-63.654	-61.562	0.18226	0.41419	2.6776	0.77921
-2.33	2.4587	-63.834	-61.537	0.18563	0.42249	2.6671	0.77899
-2.3298	2.4589	-63.959	-61.489	0.18905	0.43091	2.6566	0.77893
-2.3296	2.4591	-63.959	-61.177	0.19252	0.43946	2.6459	0.77903
-2.3294	2.4593	-64.1	-60.729	0.19603	0.44813	2.6351	0.77928
-2.3292	2.4595	-64.136	-60.347	0.19959	0.45692	2.6134	0.77968
-2.329	2.4597	-64.13	-60.521	0.20319	0.46585	2.6027	0.78024
-2.3288	2.4599	-64.173	-60.515	0.20685	0.4749	2.592	0.78096
-2.3286	2.4602	-64.274	-60.485	0.21055	0.48408	2.5811	0.78183
-2.3284	2.4604	-64.283	-60.332	0.21429	0.49338	2.5702	0.78285
-2.3282	2.4606	-64.332	-60.656	0.21809	0.50282	2.5591	0.78403
-2.328	2.4608	-64.228	-60.903	0.22193	0.51239	2.548	0.78536
-2.3278	2.461	-64.228	-60.948	0.22582	0.52208	2.5368	0.78684
-2.3276	2.4612	-64.353	-60.961	0.22976	0.53191	2.5256	0.78848
-2.3274	2.4614	-64.268	-61.116	0.23375	0.54187	2.5142	0.79027
-2.3272	2.4616	-64.24	-61.135	0.23778	0.55196	2.5028	0.79222
-2.327	2.4618	-64.362	-61.15	0.24187	0.56219	2.4914	0.79431
-2.3268	2.4621	-64.176	-61.037	0.246	0.57254	2.4799	0.79656
-2.3266	2.4623	-64.298	-61.318	0.25018	0.58303	2.4683	0.79896
-2.3264	2.4625	-64.225	-61.138	0.25441	0.59366	2.4567	0.80151
-2.3262	2.4627	-64.237	-61.241	0.25869	0.60441	2.445	0.80421
-2.326	2.4629	-64.142	-61.177	0.26302	0.61531	2.4333	0.80706
-2.3258	2.4631	-64.127	-61.129	0.2674	0.62633	2.4216	0.81757
-2.3256	2.4633	-64.088	-61.068	0.27183	0.63749	2.4098	0.82095
-2.3254	2.4635	-64.167	-60.921	0.27631	0.64879	2.398	0.82448
-2.3252	2.4637	-64.216	-60.408	0.28084	0.66022	2.3862	0.82816
-2.325	2.464	-64.182	-60.533	0.28542	0.67178	2.3744	0.83199
-2.3248	2.4642	-64.167	-60.317	0.29005	0.684	2.3625	0.83598
-2.3246	2.4644	-64.118	-60.253	0.29473	0.69585	2.3507	0.84012
-2.3244	2.4646	-64.222	-60.164	0.29946	0.70784	2.3388	0.83718
-2.3242	2.4648	-64.1	-60.329	0.30424	0.71997	2.3269	0.84184
-2.324	2.465	-64.136	-60.576	0.30907	0.73223	2.3151	0.84664
-2.3238	2.4652	-64.057	-60.665	0.31395	0.74463	2.3032	0.85158
-2.3236	2.4654	-64.091	-60.833	0.31888	0.75717	2.2914	0.85667
-2.3234	2.4656	-64.387	-60.695	0.32387	0.76983	2.2795	0.8619
-2.3232	2.4659	-64.21	-60.475	0.3289	0.78264	2.2677	0.86727
-2.323	2.4661	-64.164	-60.506	0.33398	0.79558	2.2559	0.87279
-2.3228	2.4663	-64.167	-60.402	0.33911	0.80865	2.2441	0.87844
-2.3226	2.4665	-64.332	-60.204	0.34429	0.82186	2.2324	0.87701
-2.3224	2.4667	-64.429	-60.555	0.34953	0.8352	2.2207	0.88316
-2.3222	2.4669	-64.39	-60.384	0.35481	0.84867	2.209	0.89578
-2.322	2.4671	-64.594	-60.353	0.36015	0.86228	2.1974	0.90239
-2.3218	2.4673	-64.49	-60.305	0.36553	0.87602	2.1858	0.90913
-2.3216	2.4675	-64.493	-60.607	0.37096	0.88989	2.1743	0.91601
-2.3214	2.4678	-64.475	-60.536	0.37645	0.90389	2.1628	0.92303
-2.3212	2.468	-64.698	-60.656	0.38198	0.91802	2.1514	0.93017
-2.321	2.4682	-64.637	-60.567	0.38756	0.93228	2.14	0.93746
-2.3208	2.4684	-64.643	-60.799	0.3932	0.94667	2.1287	0.94488
-2.3206	2.4686	-64.5	-60.677	0.39888	0.96118	2.1175	0.95243
-2.3204	2.4688	-64.484	-60.869	0.40461	0.97583	2.1063	0.96011
-2.3202	2.469	-64.597	-60.768	0.41039	0.9906	2.0952	0.96792
-2.32	2.4692	-64.353	-60.869	0.41649	1.0055	2.0842	0.97587
-2.3198	2.4695	-64.164	-60.695	0.42238	1.0205	2.0733	0.98394
-2.3196	2.4697	-63.978	-60.771	0.42859	1.0356	2.0625	0.99215
-2.3194	2.4699	-63.981	-60.887	0.43459	1.0509	2.0517	1.0005
-2.3192	2.4701	-64.109	-60.659	0.44064	1.0663	2.0411	1.0089
-2.319	2.4703	-64.142	-60.674	0.44674	1.0818	2.0305	1.0175
-2.3188	2.4705	-64.179	-60.475	0.45288	1.0974	2.0201	1.0262
-2.3186	2.4707	-64.222	-60.704	0.45908	1.1131	2.0097	1.0351
-2.3184	2.4709	-64.271	-60.753	0.46532	1.129	1.9995	1.044
-2.3182	2.4711	-64.411	-60.738	0.47161	1.145	1.9893	1.0531
-2.318	2.4714	-64.371	-60.842	0.47795	1.161	1.9793	1.0623
-2.3178	2.4716	-64.42	-60.784	0.48434	1.1772	1.9694	1.0717
-2.3176	2.4718	-64.582	-60.71	0.49078	1.1935	1.9596	1.0811
-2.3174	2.472	-64.374	-60.771	0.49726	1.2099	1.9499	1.0907
-2.3172	2.4722	-64.445	-60.93	0.50379	1.2264	1.9403	1.1004
-2.317	2.4724	-64.53	-60.881	0.51037	1.243	1.9309	1.1102
-2.3168	2.4726	-64.533	-60.964	0.51699	1.2597	1.9216	1.1201
-2.3166	2.4728	-64.646	-60.765	0.52366	1.2766	1.9124	1.1301
-2.3164	2.4731	-64.774	-60.973	0.53038	1.2935	1.9033	1.1402
-2.3162	2.4733	-64.939	-60.967	0.53714	1.3105	1.8944	1.1505
-2.316	2.4735	-64.838	-60.982	0.54395	1.3276	1.8856	1.1609
-2.3158	2.4737	-64.823	-61.107	0.5508	1.3448	1.877	1.1713
-2.3156	2.4739	-64.948	-60.775	0.5577	1.362	1.8685	1.1819
-2.3154	2.4741	-64.936	-60.851	0.56464	1.3794	1.8602	1.1926
-2.3152	2.4743	-64.881	-61.006	0.57162	1.3968	1.852	1.2034
-2.315	2.4746	-65.262	-61.135	0.57865	1.4144	1.8439	1.2143
-2.3148	2.4748	-64.988	-60.988	0.58572	1.432	1.836	1.2253
-2.3146	2.475	-64.832	-61.077	0.59284	1.4497	1.8282	1.2364
-2.3144	2.4752	-64.905	-61.193	0.6	1.4675	1.8206	1.2476
-2.3142	2.4754	-64.857	-61.068	0.6072	1.4853	1.8132	1.259
-2.314	2.4756	-64.6	-61.168	0.61444	1.5032	1.8059	1.2704
-2.3138	2.4758	-64.451	-61.229	0.62173	1.5212	1.7987	1.2819
-2.3136	2.476	-64.457	-61.226	0.62905	1.5392	1.7917	1.2998
-2.3134	2.4763	-64.475	-61.11	0.63642	1.5573	1.7849	1.3117
-2.3132	2.4765	-64.411	-61	0.64383	1.5755	1.7783	1.3237
-2.313	2.4767	-64.231	-61.107	0.65127	1.5937	1.7718	1.3358
-2.3128	2.4769	-64.124	-61.138	0.65876	1.612	1.7654	1.3479
-2.3126	2.4771	-64.066	-61.077	0.66628	1.6303	1.7593	1.3602
-2.3124	2.4773	-63.874	-61.119	0.67385	1.6487	1.7533	1.3726
-2.3123	2.4775	-63.831	-61.04	0.68145	1.6671	1.7475	1.385
-2.3121	2.4778	-63.935	-61.113	0.68909	1.6856	1.7418	1.3976
-2.3119	2.478	-64.042	-61.025	0.69677	1.7041	1.7363	1.4102
-2.3117	2.4782	-64.066	-60.979	0.70448	1.7226	1.731	1.4229
-2.3115	2.4784	-63.959	-60.985	0.71224	1.7412	1.7258	1.4357
-2.3113	2.4786	-64.265	-61	0.72002	1.7598	1.7208	1.4486
-2.3111	2.4788	-64.258	-60.884	0.72784	1.7784	1.716	1.4615
-2.3109	2.479	-63.972	-60.768	0.7357	1.797	1.7114	1.4746
-2.3107	2.4792	-64.136	-60.5	0.7436	1.8157	1.7069	1.4877
-2.3105	2.4795	-63.856	-60.186	0.75152	1.8344	1.7026	1.5009
-2.3103	2.4797	-63.825	-60.134	0.75948	1.8531	1.6985	1.5142
-2.3101	2.4799	-63.892	-60.085	0.76748	1.8718	1.6946	1.5276
-2.3099	2.4801	-63.969	-59.835	0.7755	1.8905	1.6908	1.541
-2.3097	2.4803	-64.155	-59.975	0.78356	1.9092	1.6872	1.5545
-2.3095	2.4805	-63.972	-59.835	0.79165	1.9279	1.6837	1.5681
-2.3093	2.4807	-64.078	-59.932	0.80005	1.9466	1.6805	1.5817
-2.3091	2.481	-64.155	-59.999	0.80821	1.9653	1.6774	1.5954
-2.3089	2.4812	-64.194	-59.914	0.8164	1.984	1.6745	1.6092
-2.3087	2.4814	-64.222	-60.073	0.82463	2.0027	1.6717	1.623
-2.3085	2.4816	-64.124	-60.115	0.83288	2.0213	1.6691	1.6369
-2.3083	2.4818	-64.207	-60.088	0.84116	2.0399	1.6667	1.6509
-2.3081	2.482	-64.188	-60.289	0.84947	2.0585	1.6645	1.6649
-2.3079	2.4822	-64.197	-60.103	0.85781	2.0771	1.6624	1.679
-2.3077	2.4825	-64.149	-60.222	0.86618	2.0956	1.6605	1.6931
-2.3075	2.4827	-64.271	-60.164	0.87458	2.1141	1.6588	1.7073
-2.3073	2.4829	-64.033	-60.298	0.883	2.1326	1.6572	1.7215
-2.3071	2.4831	-63.706	-60.378	0.89145	2.151	1.6558	1.7358
-2.3069	2.4833	-63.282	-60.298	0.89992	2.1694	1.6546	1.7502
-2.3067	2.4835	-63.041	-60.335	0.90842	2.1877	1.6535	1.7646
-2.3065	2.4837	-63.013	-60.405	0.91694	2.2059	1.6526	1.779
-2.3063	2.484	-63.318	-60.39	0.92549	2.2241	1.6518	1.7935
-2.3061	2.4842	-63.383	-60.219	0.93406	2.2422	1.6512	1.808
-2.3059	2.4844	-63.676	-60.399	0.94266	2.2603	1.6508	1.8225
-2.3057	2.4846	-63.587	-60.454	0.95127	2.2783	1.6505	1.8371
-2.3055	2.4848	-63.706	-60.39	0.95991	2.2962	1.6504	1.8518
-2.3053	2.485	-63.761	-60.329	0.96858	2.314	1.6504	1.8665
-2.3051	2.4852	-63.773	-60.613	0.97726	2.3318	1.6506	1.8812
-2.3049	2.4855	-63.999	-60.717	0.98596	2.3494	1.6509	1.8959
-2.3047	2.4857	-64.02	-60.543	0.99469	2.367	1.6514	1.9107
-2.3045	2.4859	-63.978	-60.604	1.0034	2.3844	1.652	1.9181
-2.3043	2.4861	-64.207	-60.68	1.0122	2.4018	1.6528	1.9332
-2.3041	2.4863	-64.286	-60.61	1.021	2.4191	1.6537	1.9482
-2.3039	2.4865	-64.329	-60.399	1.0298	2.4362	1.6547	1.9633
-2.3037	2.4867	-64.249	-60.329	1.0386	2.4533	1.6559	1.9784
-2.3035	2.487	-64.487	-60.25	1.0474	2.4702	1.6572	1.9935
-2.3033	2.4872	-64.399	-60.164	1.0563	2.487	1.6587	2.0087
-2.3031	2.4874	-64.466	-60.146	1.0652	2.5037	1.6603	2.0238
-2.3029	2.4876	-64.564	-59.957	1.074	2.5203	1.662	2.0389
-2.3027	2.4878	-64.542	-60.131	1.0829	2.5367	1.6638	2.0541
-2.3025	2.488	-64.686	-60.103	1.0919	2.553	1.6658	2.0692
-2.3023	2.4883	-64.603	-60.21	1.1008	2.5692	1.6679	2.0844
-2.3021	2.4885	-64.658	-59.948	1.1097	2.5852	1.6701	2.0996
-2.3019	2.4887	-64.591	-59.801	1.1187	2.6011	1.6724	2.1147
-2.3017	2.4889	-64.612	-59.499	1.1277	2.6169	1.6748	2.1299
-2.3015	2.4891	-64.539	-59.542	1.1366	2.6324	1.6774	2.1515
-2.3013	2.4893	-64.463	-59.468	1.1456	2.6479	1.68	2.1669
-2.3011	2.4895	-64.295	-59.505	1.1546	2.6632	1.6828	2.1749
-2.3009	2.4898	-64.219	-59.322	1.1637	2.6783	1.6856	2.1905
-2.3007	2.49	-64.008	-59.325	1.1727	2.6932	1.6886	2.206
-2.3005	2.4902	-63.947	-59.328	1.1817	2.708	1.6917	2.2216
-2.3003	2.4904	-63.907	-59.386	1.1908	2.7226	1.6948	2.2371
-2.3001	2.4906	-64.026	-59.221	1.1999	2.737	1.6981	2.2526
-2.2999	2.4908	-63.932	-59.423	1.2089	2.7513	1.7014	2.2681
-2.2997	2.4911	-63.871	-59.426	1.218	2.7653	1.7048	2.2836
-2.2995	2.4913	-64.124	-59.413	1.2271	2.7792	1.7084	2.2991
-2.2993	2.4915	-64.316	-59.609	1.2362	2.7929	1.7119	2.3146
-2.2991	2.4917	-64.319	-59.719	1.2453	2.8064	1.7156	2.33
-2.2989	2.4919	-64.469	-59.587	1.2544	2.8197	1.7194	2.3454
-2.2987	2.4921	-64.24	-59.392	1.2635	2.8328	1.7232	2.3608
-2.2985	2.4924	-64.438	-59.365	1.2727	2.8458	1.727	2.3761
-2.2983	2.4926	-64.31	-59.365	1.2818	2.8585	1.731	2.3915
-2.2981	2.4928	-64.274	-59.148	1.2909	2.871	1.735	2.4068
-2.2979	2.493	-64.106	-58.947	1.3001	2.8833	1.7391	2.422
-2.2977	2.4932	-64.21	-59.172	1.3092	2.8954	1.7432	2.4373
-2.2975	2.4934	-64.298	-59.227	1.3184	2.9072	1.7474	2.4525
-2.2973	2.4936	-64.207	-59.322	1.3275	2.9189	1.7516	2.4677
-2.2971	2.4939	-64.393	-59.31	1.3367	2.9303	1.7558	2.4828
-2.2969	2.4941	-64.39	-59.148	1.3459	2.9416	1.7602	2.4979
-2.2967	2.4943	-64.371	-59.459	1.355	2.9526	1.7645	2.5129
-2.2965	2.4945	-64.527	-59.798	1.3642	2.9633	1.7689	2.528
-2.2963	2.4947	-64.515	-59.468	1.3734	2.9739	1.7733	2.5429
-2.2961	2.4949	-64.576	-59.685	1.3826	2.9842	1.789	2.5579
-2.2959	2.4952	-64.472	-59.685	1.3918	2.9943	1.7938	2.5801
-2.2957	2.4954	-64.353	-59.862	1.4009	3.0041	1.7987	2.5952
-2.2955	2.4956	-64.429	-59.825	1.4101	3.0137	1.8036	2.6102
-2.2953	2.4958	-64.399	-59.874	1.4193	3.0231	1.8085	2.6252
-2.2951	2.496	-64.329	-59.996	1.4285	3.0322	1.8134	2.6401
-2.2949	2.4962	-64.03	-60.128	1.4377	3.0411	1.8183	2.655
-2.2947	2.4965	-63.749	-60.143	1.4469	3.0498	1.8233	2.6698
-2.2945	2.4967	-63.679	-59.972	1.4561	3.0582	1.8283	2.6846
-2.2943	2.4969	-63.587	-60.033	1.4653	3.0664	1.8333	2.6993
-2.2941	2.4971	-63.514	-60.033	1.4744	3.0743	1.8382	2.714
-2.2939	2.4973	-63.465	-60.085	1.4836	3.082	1.8432	2.7286
-2.2937	2.4975	-63.395	-59.99	1.4928	3.0894	1.8482	2.7432
-2.2935	2.4978	-63.584	-60.149	1.502	3.0966	1.8532	2.7577
-2.2933	2.498	-63.572	-59.963	1.5112	3.1035	1.8582	2.7721
-2.2931	2.4982	-63.605	-59.691	1.5204	3.1102	1.8632	2.7865
-2.2929	2.4984	-63.575	-59.615	1.5295	3.1166	1.8682	2.8008
-2.2927	2.4986	-63.807	-59.691	1.5387	3.1228	1.8731	2.8151
-2.2925	2.4989	-63.73	-59.752	1.5479	3.1287	1.8781	2.8293
-2.2923	2.4991	-63.801	-59.767	1.5571	3.1343	1.883	2.8435
-2.2921	2.4993	-63.987	-59.886	1.5662	3.1397	1.8879	2.8575
-2.2919	2.4995	-64.1	-59.789	1.5754	3.1449	1.8928	2.8715
-2.2917	2.4997	-64.066	-60.1	1.5846	3.1498	1.8976	2.8855
-2.2915	2.4999	-63.975	-60.005	1.5937	3.1544	1.9024	2.8993
-2.2913	2.5002	-64.097	-60.125	1.6029	3.1588	1.9072	2.9131
-2.2911	2.5004	-64.094	-60.366	1.612	3.1629	1.912	2.9268
-2.2909	2.5006	-64.091	-60.314	1.6212	3.1668	1.9167	2.9405
-2.2907	2.5008	-64.152	-60.396	1.6303	3.1704	1.9213	2.9541
-2.2905	2.501	-64.121	-60.479	1.6395	3.1738	1.926	2.9676
-2.2903	2.5012	-64.091	-60.588	1.6486	3.1769	1.9305	2.981
-2.2901	2.5015	-63.914	-60.793	1.6577	3.1797	1.9351	2.9943
-2.2899	2.5017	-64.066	-60.607	1.6668	3.1823	1.9395	3.0076
-2.2897	2.5019	-64.051	-60.646	1.676	3.1846	1.944	3.0207
-2.2895	2.5021	-64.146	-60.561	1.6851	3.1867	1.9483	3.0338
-2.2893	2.5023	-64.081	-60.811	1.6942	3.1886	1.9526	3.0468
-2.2891	2.5025	-64.185	-60.979	1.7033	3.1901	1.9569	3.0598
-2.2889	2.5028	-64.252	-60.817	1.7124	3.1915	1.961	3.0726
-2.2887	2.503	-64.286	-60.643	1.7215	3.1926	1.9652	3.0854
-2.2885	2.5032	-64.323	-60.747	1.7305	3.1934	1.9692	3.098
-2.2883	2.5034	-64.362	-60.775	1.7396	3.194	1.9732	3.1106
-2.2881	2.5036	-64.368	-60.515	1.7487	3.1943	1.9771	3.1231
-2.2879	2.5039	-64.435	-60.717	1.7577	3.1944	1.9809	3.1355
-2.2877	2.5041	-64.329	-60.573	1.7668	3.1943	1.9846	3.1477
-2.2875	2.5043	-64.109	-60.759	1.7758	3.1939	1.9883	3.1599
-2.2873	2.5045	-63.886	-60.591	1.7849	3.1933	1.9919	3.1721
-2.2871	2.5047	-63.911	-60.802	1.7939	3.1924	1.9954	3.1841
-2.2869	2.5049	-63.749	-60.671	1.8029	3.1913	1.9988	3.196
-2.2867	2.5052	-63.734	-60.701	1.8122	3.19	1.9912	3.2078
-2.2865	2.5054	-63.648	-60.579	1.8212	3.1884	1.9947	3.2195
-2.2863	2.5056	-63.984	-60.5	1.8302	3.1866	1.9982	3.2311
-2.2861	2.5058	-63.785	-60.543	1.8392	3.1846	2.0016	3.2426
-2.2859	2.506	-63.862	-60.308	1.8482	3.1823	2.0048	3.254
-2.2857	2.5063	-63.944	-60.271	1.8572	3.1798	2.008	3.2653
-2.2855	2.5065	-64.146	-60.143	1.8662	3.1771	2.0111	3.2765
-2.2853	2.5067	-64.063	-60.179	1.8751	3.1742	2.014	3.2876
-2.2851	2.5069	-63.953	-59.877	1.8841	3.1711	2.0169	3.2986
-2.2849	2.5071	-64.014	-60.002	1.893	3.1677	2.0196	3.3094
-2.2848	2.5073	-64.155	-60.1	1.902	3.1642	2.0222	3.3202
-2.2846	2.5076	-64.139	-60.125	1.9109	3.1604	2.0248	3.3309
-2.2844	2.5078	-64.112	-59.969	1.9198	3.1564	2.0272	3.3414
-2.2842	2.508	-64.094	-60.009	1.9287	3.1522	2.0295	3.3518
-2.284	2.5082	-64.307	-59.926	1.9376	3.1478	2.0316	3.3621
-2.2838	2.5084	-64.292	-59.81	1.9465	3.1432	2.0337	3.3723
-2.2836	2.5087	-64.414	-59.926	1.9554	3.1385	2.0357	3.3824
-2.2834	2.5089	-64.484	-59.963	1.9642	3.1335	2.0375	3.3924
-2.2832	2.5091	-64.466	-60.009	1.9731	3.1283	2.0392	3.4023
-2.283	2.5093	-64.405	-59.929	1.9819	3.123	2.0408	3.412
-2.2828	2.5095	-64.426	-60.012	1.9908	3.1175	2.0423	3.4216
-2.2826	2.5098	-64.304	-60.128	1.9996	3.1117	2.0437	3.4311
-2.2824	2.51	-64.194	-60.262	2.0084	3.1059	2.0562	3.4405
-2.2822	2.5102	-64.243	-60.222	2.0172	3.0998	2.0577	3.4498
-2.282	2.5104	-64.173	-60.17	2.026	3.0936	2.0591	3.4589
-2.2818	2.5106	-64.057	-60.195	2.0348	3.0872	2.0603	3.4679
-2.2816	2.5109	-63.871	-60.198	2.0435	3.0806	2.0615	3.4768
-2.2814	2.5111	-63.846	-60.25	2.0523	3.0739	2.0625	3.4856
-2.2812	2.5113	-63.92	-60.463	2.061	3.067	2.0634	3.5018
-2.281	2.5115	-63.721	-60.378	2.0698	3.06	2.0532	3.5105
-2.2808	2.5117	-63.874	-60.515	2.0785	3.0528	2.0542	3.5191
-2.2806	2.5119	-63.828	-60.524	2.0872	3.0455	2.0552	3.5276
-2.2804	2.5122	-64.02	-60.591	2.0959	3.0381	2.0559	3.536
-2.2802	2.5124	-63.816	-60.75	2.1046	3.0305	2.0566	3.5443
-2.28	2.5126	-63.672	-60.479	2.1133	3.0227	2.0572	3.5524
-2.2798	2.5128	-63.544	-60.701	2.1219	3.0149	2.0576	3.5605
-2.2796	2.513	-63.639	-60.649	2.1306	3.0069	2.0579	3.5684
-2.2794	2.5133	-63.721	-60.576	2.1392	2.9988	2.0582	3.5761
-2.2792	2.5135	-63.816	-60.469	2.1478	2.9905	2.0582	3.5838
-2.279	2.5137	-63.865	-60.46	2.1564	2.9822	2.0582	3.5913
-2.2788	2.5139	-63.822	-60.533	2.165	2.9737	2.0581	3.5987
-2.2786	2.5141	-63.837	-60.659	2.1736	2.9651	2.0579	3.606
-2.2784	2.5144	-63.837	-60.564	2.1822	2.9565	2.0575	3.6132
-2.2782	2.5146	-63.962	-60.601	2.1907	2.9477	2.0571	3.6202
-2.278	2.5148	-63.721	-60.622	2.1992	2.9388	2.0565	3.6271
-2.2778	2.515	-63.706	-60.744	2.2078	2.9299	2.0558	3.6339
-2.2776	2.5152	-63.776	-60.646	2.2163	2.9208	2.055	3.6405
-2.2774	2.5155	-63.706	-60.649	2.2248	2.9117	2.0541	3.6471
-2.2772	2.5157	-63.807	-60.692	2.2332	2.9025	2.0532	3.6535
-2.277	2.5159	-63.776	-60.543	2.2417	2.8932	2.0521	3.6597
-2.2768	2.5161	-63.663	-60.482	2.2502	2.8838	2.0509	3.6734
-2.2766	2.5163	-63.648	-60.576	2.2586	2.8744	2.0496	3.6796
-2.2764	2.5166	-63.618	-60.576	2.267	2.8649	2.0482	3.6858
-2.2762	2.5168	-63.633	-60.628	2.2754	2.8553	2.0467	3.6918
-2.276	2.517	-63.584	-60.656	2.2838	2.8457	2.0451	3.6976
-2.2758	2.5172	-63.621	-60.521	2.2922	2.836	2.0435	3.7034
-2.2756	2.5174	-63.599	-60.768	2.3005	2.8263	2.0417	3.7164
-2.2754	2.5177	-63.676	-60.811	2.3089	2.8165	2.0399	3.7222
-2.2752	2.5179	-63.749	-60.701	2.3172	2.8067	2.0379	3.7278
-2.275	2.5181	-63.846	-60.714	2.3255	2.7968	2.0359	3.7407
-2.2748	2.5183	-63.758	-60.891	2.3338	2.7869	2.0228	3.7463
-2.2746	2.5185	-63.642	-60.793	2.3421	2.777	2.0209	3.7518
-2.2744	2.5188	-63.648	-60.863	2.3503	2.767	2.019	3.7572
-2.2742	2.519	-63.776	-61.013	2.3586	2.757	2.0169	3.7625
-2.274	2.5192	-63.627	-60.836	2.3668	2.747	2.0148	3.7677
-2.2738	2.5194	-63.306	-60.918	2.375	2.737	2.0126	3.7728
-2.2736	2.5197	-63.285	-61.119	2.3832	2.727	2.0103	3.7778
-2.2734	2.5199	-63.328	-61.122	2.3913	2.7169	2.0079	3.7826
-2.2732	2.5201	-63.23	-61.104	2.3995	2.7069	2.0055	3.7874
-2.273	2.5203	-63.41	-61.159	2.4076	2.6968	2.003	3.7921
-2.2728	2.5205	-63.526	-61.068	2.4157	2.6867	2.0004	3.7966
-2.2726	2.5208	-63.541	-61.196	2.4238	2.6767	1.9977	3.801
-2.2724	2.521	-63.575	-61.321	2.4319	2.6666	1.995	3.8054
-2.2722	2.5212	-63.547	-61.11	2.44	2.6566	1.9922	3.8096
-2.272	2.5214	-63.712	-61.129	2.448	2.6465	1.9894	3.8138
-2.2718	2.5216	-63.822	-61.071	2.456	2.6365	1.9865	3.8178
-2.2716	2.5219	-63.877	-61.245	2.464	2.6265	1.9835	3.8292
-2.2714	2.5221	-63.843	-61.226	2.472	2.6165	1.9805	3.8332
-2.2712	2.5223	-63.804	-61.379	2.4799	2.6065	1.9774	3.8372
-2.271	2.5225	-64.103	-61.211	2.4879	2.5966	1.9743	3.8411
-2.2708	2.5227	-63.981	-61.406	2.4958	2.5867	1.9711	3.8449
-2.2706	2.523	-63.859	-61.348	2.5037	2.5768	1.9679	3.8486
-2.2704	2.5232	-63.923	-61.327	2.5116	2.5669	1.9646	3.8522
-2.2702	2.5234	-63.901	-61.47	2.5194	2.5571	1.9613	3.8557
-2.27	2.5236	-63.911	-61.571	2.5272	2.5474	1.958	3.8591
-2.2698	2.5239	-63.874	-61.388	2.5351	2.5376	1.9546	3.8625
-2.2696	2.5241	-63.95	-61.379	2.5428	2.5279	1.9512	3.8733
-2.2694	2.5243	-64.005	-61.36	2.5506	2.5183	1.9478	3.8767
-2.2692	2.5245	-64.103	-61.452	2.5583	2.5087	1.9443	3.88
-2.269	2.5247	-64.258	-61.443	2.5661	2.4992	1.9408	3.8833
-2.2688	2.525	-64.319	-61.467	2.5738	2.4897	1.9373	3.8864
-2.2686	2.5252	-64.536	-61.211	2.5814	2.4802	1.9338	3.8896
-2.2684	2.5254	-64.646	-61.068	2.5891	2.4708	1.9302	3.8926
-2.2682	2.5256	-64.741	-60.915	2.5967	2.4615	1.9267	3.8956
-2.268	2.5258	-64.615	-60.942	2.6043	2.4523	1.9231	3.8985
-2.2678	2.5261	-64.814	-61.08	2.6119	2.4431	1.9195	3.9013
-2.2676	2.5263	-64.841	-61.064	2.6194	2.4339	1.9159	3.9041
-2.2674	2.5265	-64.792	-61.08	2.6269	2.4249	1.9123	3.9068
-2.2672	2.5267	-64.847	-61.101	2.6344	2.4159	1.9087	3.9094
-2.267	2.527	-64.979	-60.891	2.6419	2.4069	1.9051	3.912
-2.2668	2.5272	-65.235	-60.894	2.6494	2.3981	1.9015	3.9145
-2.2666	2.5274	-65.153	-60.555	2.6568	2.3893	1.8979	3.917
-2.2664	2.5276	-65.11	-60.613	2.6642	2.3805	1.8943	3.9194
-2.2662	2.5278	-65.153	-60.744	2.6715	2.3719	1.8907	3.9218
-2.266	2.5281	-65.061	-60.442	2.6789	2.3633	1.8871	3.9241
-2.2658	2.5283	-65.082	-60.115	2.6862	2.3548	1.8836	3.9264
-2.2656	2.5285	-64.991	-59.606	2.6935	2.3464	1.88	3.9286
-2.2654	2.5287	-65.131	-59.456	2.7007	2.3381	1.8765	3.9307
-2.2652	2.529	-65.25	-59.105	2.7079	2.3298	1.873	3.9328
-2.265	2.5292	-65.296	-59.2	2.7151	2.3216	1.8695	3.9349
-2.2648	2.5294	-65.186	-59.276	2.7223	2.3135	1.8661	3.9369
-2.2646	2.5296	-65.183	-59.163	2.7294	2.3055	1.8627	3.9389
-2.2644	2.5298	-65.195	-59.423	2.7365	2.2975	1.8593	3.9408
-2.2642	2.5301	-65.116	-59.713	2.7436	2.2897	1.8559	3.9427
-2.264	2.5303	-65.192	-59.774	2.7507	2.2819	1.8526	3.9446
-2.2638	2.5305	-65.25	-59.752	2.7577	2.2742	1.8493	3.9465
-2.2636	2.5307	-65.375	-59.56	2.7646	2.2666	1.846	3.9483
-2.2634	2.531	-65.162	-59.627	2.7716	2.2591	1.8428	3.95
-2.2632	2.5312	-65.241	-59.838	2.7785	2.2516	1.8396	3.9518
-2.263	2.5314	-65.259	-59.636	2.7854	2.2442	1.8365	3.9535
-2.2628	2.5316	-65.104	-59.89	2.7922	2.237	1.8334	3.9552
-2.2626	2.5319	-65.204	-60.03	2.799	2.2298	1.8304	3.9569
-2.2624	2.5321	-65.061	-59.874	2.8058	2.2226	1.8274	3.9585
-2.2622	2.5323	-65.082	-59.865	2.8125	2.2156	1.8245	3.9601
-2.262	2.5325	-64.921	-60.06	2.8192	2.2087	1.8216	3.9617
-2.2618	2.5327	-64.863	-60.048	2.8259	2.2018	1.8188	3.9633
-2.2616	2.533	-64.954	-60.28	2.8325	2.195	1.816	3.9649
-2.2614	2.5332	-64.857	-60.192	2.8391	2.1883	1.8133	3.9665
-2.2612	2.5334	-64.86	-60.369	2.8457	2.1817	1.8106	3.9681
-2.261	2.5336	-65.018	-60.582	2.8522	2.1751	1.808	3.9696
-2.2608	2.5339	-65.14	-60.561	2.8586	2.1687	1.8055	3.9712
-2.2606	2.5341	-65.07	-60.598	2.8651	2.1623	1.8031	3.9727
-2.2604	2.5343	-65.003	-60.747	2.8715	2.1559	1.8007	3.9742
-2.2602	2.5345	-64.765	-60.741	2.8778	2.1497	1.7983	3.9758
-2.26	2.5348	-65.034	-60.912	2.8841	2.1436	1.7961	3.9773
-2.2598	2.535	-64.884	-60.802	2.8904	2.1375	1.7939	3.9789
-2.2596	2.5352	-64.792	-60.811	2.8966	2.1315	1.7918	3.9804
-2.2594	2.5354	-64.768	-60.9	2.9028	2.1255	1.7897	3.982
-2.2592	2.5356	-64.823	-61.055	2.9089	2.1197	1.7878	3.9835
-2.259	2.5359	-64.783	-60.891	2.915	2.1139	1.7859	3.9851
-2.2588	2.5361	-64.817	-60.945	2.9211	2.1081	1.7841	3.9867
-2.2586	2.5363	-64.625	-60.747	2.9271	2.1025	1.7823	3.9883
-2.2584	2.5365	-64.399	-61.025	2.933	2.0969	1.7807	3.9899
-2.2582	2.5368	-63.987	-60.845	2.9389	2.0914	1.7902	3.9916
-2.258	2.537	-63.987	-60.921	2.9448	2.0859	1.789	3.9932
-2.2578	2.5372	-63.923	-61.238	2.9506	2.0805	1.7879	3.9949
-2.2576	2.5374	-63.758	-61.196	2.9564	2.0752	1.7869	3.9966
-2.2575	2.5377	-63.682	-61.125	2.9621	2.0699	1.786	3.9983
-2.2573	2.5379	-63.508	-61.034	2.9677	2.0646	1.7852	4.0001
-2.2571	2.5381	-63.505	-60.985	2.9733	2.0595	1.7845	4.0019
-2.2569	2.5383	-63.489	-60.924	2.9789	2.0544	1.7839	4.0037
-2.2567	2.5386	-63.468	-60.9	2.9844	2.0493	1.7834	4.0056
-2.2565	2.5388	-63.596	-61.034	2.9899	2.0443	1.783	4.0075
-2.2563	2.539	-63.611	-60.805	2.9952	2.0393	1.7826	4.0094
-2.2561	2.5392	-63.651	-60.387	3.0006	2.0344	1.7824	4.0113
-2.2559	2.5395	-63.746	-60.366	3.0059	2.0296	1.7822	4.0134
-2.2557	2.5397	-63.904	-59.981	3.0111	2.0248	1.7822	4.0154
-2.2555	2.5399	-63.953	-59.807	3.0163	2.02	1.7822	4.0175
-2.2553	2.5401	-63.92	-59.651	3.0214	2.0152	1.7824	4.0196
-2.2551	2.5404	-63.938	-59.471	3.0264	2.0105	1.7826	4.0218
-2.2549	2.5406	-64.051	-59.328	3.0314	2.0059	1.783	4.024
-2.2547	2.5408	-64.139	-59.398	3.0363	2.0012	1.7834	4.0263
-2.2545	2.541	-64.161	-59.459	3.0412	1.9967	1.784	4.0286
-2.2543	2.5412	-64.036	-59.468	3.046	1.9921	1.7846	4.031
-2.2541	2.5415	-63.898	-59.572	3.0508	1.9876	1.7854	4.0335
-2.2539	2.5417	-63.801	-59.465	3.0554	1.983	1.7862	4.036
-2.2537	2.5419	-63.734	-59.716	3.0601	1.9786	1.7871	4.0385
-2.2535	2.5421	-63.669	-59.627	3.0646	1.9741	1.7882	4.0411
-2.2533	2.5424	-63.801	-59.636	3.0691	1.9697	1.7893	4.0438
-2.2531	2.5426	-63.819	-59.78	3.0735	1.9652	1.7905	4.0465
-2.2529	2.5428	-63.825	-59.874	3.0778	1.9608	1.7918	4.0493
-2.2527	2.543	-63.853	-60.015	3.0821	1.957	1.7933	4.0522
-2.2525	2.5433	-63.969	-60.063	3.0863	1.9526	1.7948	4.0551
-2.2523	2.5435	-63.953	-59.81	3.0905	1.9483	1.7964	4.0581
-2.2521	2.5437	-64.112	-59.655	3.0945	1.9439	1.7981	4.0612
-2.2519	2.5439	-64.2	-59.88	3.0985	1.9396	1.7999	4.0643
-2.2517	2.5442	-64.155	-59.694	3.1024	1.9353	1.8018	4.0675
-2.2515	2.5444	-64.429	-59.606	3.1063	1.9309	1.8038	4.0708
-2.2513	2.5446	-64.423	-59.49	3.11	1.9266	1.8059	4.0741
-2.2511	2.5448	-64.475	-59.395	3.1137	1.9223	1.8081	4.0776
-2.2509	2.5451	-64.539	-59.392	3.1174	1.918	1.8104	4.0811
-2.2507	2.5453	-64.384	-59.502	3.1209	1.9136	1.8127	4.0846
-2.2505	2.5455	-64.46	-59.569	3.1243	1.9093	1.8152	4.0883
-2.2503	2.5457	-64.393	-59.459	3.1277	1.905	1.8177	4.092
-2.2501	2.546	-64.344	-59.578	3.131	1.9006	1.8204	4.0958
-2.2499	2.5462	-64.512	-59.841	3.1342	1.8962	1.8231	4.0997
-2.2497	2.5464	-64.5	-59.682	3.1374	1.8919	1.8259	4.1037
-2.2495	2.5466	-64.463	-59.896	3.1404	1.8875	1.8288	4.1077
-2.2493	2.5469	-64.6	-59.877	3.1434	1.883	1.8318	4.1118
-2.2491	2.5471	-64.68	-59.963	3.1463	1.8786	1.8348	4.116
-2.2489	2.5473	-64.802	-60.057	3.1491	1.8742	1.838	4.1203
-2.2487	2.5476	-64.695	-60.076	3.1518	1.8697	1.8412	4.1247
-2.2485	2.5478	-64.631	-60.106	3.1544	1.8652	1.8445	4.1292
-2.2483	2.548	-64.802	-60.247	3.1569	1.8606	1.8478	4.1337
-2.2481	2.5482	-64.82	-60.332	3.1594	1.8561	1.8513	4.1383
-2.2479	2.5485	-64.756	-60.417	3.1617	1.8515	1.8548	4.143
-2.2477	2.5487	-64.673	-60.234	3.164	1.8469	1.8584	4.1478
-2.2475	2.5489	-64.768	-60.424	3.1661	1.8422	1.8621	4.1527
-2.2473	2.5491	-64.948	-60.491	3.1682	1.8375	1.8659	4.1577
-2.2471	2.5494	-64.832	-60.494	3.1702	1.8328	1.8697	4.1627
-2.2469	2.5496	-64.707	-60.558	3.1721	1.828	1.8736	4.1679
-2.2467	2.5498	-65.027	-60.729	3.1739	1.8232	1.8775	4.1731
-2.2465	2.55	-64.875	-60.607	3.1756	1.8183	1.8815	4.1784
-2.2463	2.5503	-65	-60.75	3.1772	1.8134	1.8856	4.1838
-2.2461	2.5505	-64.872	-60.524	3.1787	1.8085	1.8897	4.1893
-2.2459	2.5507	-64.85	-60.643	3.1801	1.8035	1.8939	4.1948
-2.2457	2.5509	-64.808	-60.799	3.1814	1.7985	1.8982	4.2005
-2.2455	2.5512	-64.908	-60.82	3.1826	1.7934	1.9025	4.2062
-2.2453	2.5514	-64.869	-60.906	3.1837	1.7883	1.9069	4.212
-2.2451	2.5516	-64.86	-60.891	3.1847	1.7831	1.9113	4.2179
-2.2449	2.5518	-64.869	-60.927	3.1856	1.7779	1.9158	4.2239
-2.2447	2.5521	-64.979	-60.964	3.1864	1.7726	1.9203	4.2299
-2.2445	2.5523	-64.899	-61.074	3.1871	1.7673	1.9249	4.2361
-2.2443	2.5525	-64.829	-61.171	3.1877	1.7619	1.9295	4.2423
-2.2441	2.5528	-64.899	-60.942	3.1882	1.7565	1.9342	4.2486
-2.2439	2.553	-64.918	-60.634	3.1886	1.751	1.9389	4.255
-2.2437	2.5532	-64.86	-60.302	3.1888	1.7454	1.9436	4.2615
-2.2435	2.5534	-64.85	-60.176	3.189	1.7398	1.9484	4.268
-2.2433	2.5537	-64.979	-59.966	3.189	1.7341	1.9532	4.2746
-2.2431	2.5539	-64.869	-59.999	3.189	1.7284	1.958	4.2813
-2.2429	2.5541	-64.86	-59.899	3.1888	1.7226	1.9629	4.2881
-2.2427	2.5543	-64.857	-59.993	3.1886	1.7168	1.9678	4.2876
-2.2425	2.5546	-64.954	-59.996	3.1882	1.7109	1.9728	4.2947
-2.2423	2.5548	-64.96	-60.067	3.1877	1.7049	1.9777	4.3019
-2.2421	2.555	-64.89	-60.088	3.1871	1.6988	1.9827	4.3091
-2.2419	2.5552	-64.741	-60.176	3.1864	1.6927	1.9877	4.3164
-2.2417	2.5555	-64.759	-60.036	3.1856	1.6866	1.9928	4.3238
-2.2415	2.5557	-64.771	-59.88	3.1846	1.6804	1.9978	4.3313
-2.2413	2.5559	-64.741	-59.96	3.1836	1.6741	2.0029	4.3387
-2.2411	2.5562	-64.796	-60.088	3.1824	1.6677	2.008	4.3463
-2.2409	2.5564	-64.619	-60.158	3.1812	1.6613	2.0131	4.3539
-2.2407	2.5566	-64.835	-60.094	3.1798	1.6548	2.0182	4.3616
-2.2405	2.5568	-64.887	-59.966	3.1783	1.6483	2.0233	4.3693
-2.2403	2.5571	-64.652	-60.067	3.1766	1.6417	2.0284	4.377
-2.2401	2.5573	-64.466	-59.987	3.1749	1.635	2.0335	4.3848
-2.2399	2.5575	-64.557	-59.99	3.1731	1.6283	2.0386	4.3927
-2.2397	2.5577	-64.545	-60.1	3.1711	1.6215	2.0438	4.4006
-2.2395	2.558	-64.42	-60.128	3.169	1.6146	2.0489	4.4085
-2.2393	2.5582	-64.35	-60.054	3.1668	1.6077	2.054	4.4165
-2.2391	2.5584	-64.338	-60.335	3.1645	1.6007	2.0591	4.4245
-2.2389	2.5587	-64.438	-60.189	3.1621	1.5936	2.0642	4.4326
-2.2387	2.5589	-64.557	-60.131	3.1595	1.5865	2.0693	4.4407
-2.2385	2.5591	-64.573	-59.688	3.1568	1.5794	2.0744	4.4488
-2.2383	2.5593	-64.646	-59.365	3.1541	1.5721	2.0795	4.4569
-2.2381	2.5596	-64.521	-59.23	3.1512	1.5648	2.0845	4.4651
-2.2379	2.5598	-64.756	-58.791	3.1481	1.5574	2.0896	4.4733
-2.2377	2.56	-64.701	-58.751	3.145	1.55	2.0946	4.4815
-2.2375	2.5603	-64.667	-58.91	3.1418	1.5425	2.0996	4.4897
-2.2373	2.5605	-64.78	-58.867	3.1384	1.535	2.1045	4.498
-2.2371	2.5607	-64.744	-58.84	3.1349	1.5274	2.1095	4.5063
-2.2369	2.5609	-64.826	-58.855	3.1313	1.5198	2.1144	4.5145
-2.2367	2.5612	-64.683	-58.562	3.1276	1.512	2.1193	4.5228
-2.2365	2.5614	-64.652	-58.531	3.1237	1.5043	2.1242	4.5311
-2.2363	2.5616	-64.759	-58.055	3.1198	1.4964	2.129	4.5394
-2.2361	2.5618	-64.796	-58.077	3.1157	1.4886	2.1338	4.5477
-2.2359	2.5621	-64.902	-58.01	3.1115	1.4806	2.1385	4.556
-2.2357	2.5623	-64.808	-57.885	3.1072	1.4727	2.1432	4.5642
-2.2355	2.5625	-64.908	-58.098	3.1028	1.4646	2.1479	4.5725
-2.2353	2.5628	-64.969	-58.022	3.0982	1.4565	2.1526	4.5808
-2.2351	2.563	-64.847	-57.628	3.0936	1.4484	2.1571	4.589
-2.2349	2.5632	-64.805	-57.823	3.0888	1.4402	2.1617	4.5972
-2.2347	2.5634	-64.835	-57.769	3.0839	1.432	2.1662	4.6054
-2.2345	2.5637	-64.811	-57.787	3.0789	1.4237	2.1706	4.6136
-2.2343	2.5639	-64.966	-57.985	3.0738	1.4154	2.175	4.6217
-2.2341	2.5641	-64.881	-58.129	3.0685	1.4071	2.1794	4.6298
-2.2339	2.5644	-64.667	-57.875	3.0632	1.3987	2.1837	4.6379
-2.2337	2.5646	-64.808	-57.735	3.0577	1.3902	2.1879	4.6459
-2.2335	2.5648	-64.686	-57.601	3.0521	1.3817	2.1921	4.6539
-2.2333	2.565	-64.719	-57.375	3.0464	1.3732	2.1963	4.6618
-2.2331	2.5653	-64.561	-57.164	3.0406	1.3647	2.2003	4.6697
-2.2329	2.5655	-64.661	-57.07	3.0347	1.3561	2.2043	4.6775
-2.2327	2.5657	-64.811	-56.938	3.0287	1.3475	2.2083	4.6853
-2.2325	2.566	-64.899	-56.807	3.0226	1.3388	2.2122	4.693
-2.2323	2.5662	-64.783	-56.624	3.0163	1.3302	2.216	4.7007
-2.2321	2.5664	-64.896	-56.752	3.0099	1.3215	2.2309	4.7082
-2.2319	2.5667	-64.857	-56.374	3.0035	1.3127	2.2349	4.7157
-2.2317	2.5669	-64.896	-51.97	2.9969	1.304	2.2388	4.7232
-2.2315	2.5671	-64.844	-44.319	2.9902	1.2952	2.2427	4.7305
-2.2313	2.5673	-64.902	-40.898	2.9834	1.2864	2.2466	4.7378
-2.2311	2.5676	-64.71	-41.368	2.9765	1.2776	2.2504	4.745
-2.2309	2.5678	-64.704	-44.707	2.9695	1.2688	2.2541	4.7521
-2.2307	2.568	-64.493	-47.789	2.9624	1.2599	2.2577	4.7591
-2.2305	2.5683	-64.466	-49.987	2.9552	1.251	2.2613	4.7659
-2.2303	2.5685	-64.435	-51.268	2.9479	1.2422	2.2648	4.7727
-2.2301	2.5687	-64.289	-52.327	2.9404	1.2333	2.2683	4.7794
-2.23	2.5689	-64.234	-52.809	2.9329	1.2244	2.2717	4.786
-2.2298	2.5692	-64.323	-53.725	2.9253	1.2155	2.275	4.7925
-2.2296	2.5694	-64.35	-54.229	2.9176	1.2066	2.2782	4.7988
-2.2294	2.5696	-64.454	-54.686	2.9097	1.1977	2.2814	4.805
-2.2292	2.5699	-64.35	-55.043	2.9018	1.1888	2.2845	4.8111
-2.229	2.5701	-64.277	-55.684	2.8938	1.1798	2.2876	4.8171
-2.2288	2.5703	-64.295	-56.041	2.8857	1.1709	2.2905	4.8305
-2.2286	2.5706	-64.35	-56.508	2.8774	1.162	2.2934	4.8364
-2.2284	2.5708	-64.289	-56.768	2.8691	1.1531	2.2962	4.8422
-2.2282	2.571	-64.411	-57.271	2.8607	1.1443	2.299	4.8405
-2.228	2.5712	-64.466	-57.445	2.8522	1.1354	2.3016	4.8462
-2.2278	2.5715	-64.39	-57.86	2.8436	1.1265	2.3042	4.8518
-2.2276	2.5717	-64.42	-57.878	2.8349	1.1177	2.3068	4.8572
-2.2274	2.5719	-64.42	-58.089	2.8262	1.1088	2.3092	4.8625
-2.2272	2.5722	-64.408	-58.165	2.8173	1.1	2.3116	4.8676
-2.227	2.5724	-64.332	-58.013	2.8083	1.0912	2.3139	4.8725
-2.2268	2.5726	-64.231	-57.817	2.7993	1.0825	2.3161	4.8773
-2.2266	2.5729	-64.393	-57.827	2.7902	1.0737	2.3074	4.8819
-2.2264	2.5731	-64.414	-58.089	2.781	1.065	2.3098	4.8863
-2.2262	2.5733	-64.466	-58.132	2.7717	1.0563	2.3121	4.8906
-2.226	2.5735	-64.396	-58.202	2.7623	1.0477	2.3143	4.8946
-2.2258	2.5738	-64.432	-58.504	2.7528	1.039	2.3164	4.8985
-2.2256	2.574	-64.542	-58.565	2.7433	1.0304	2.3185	4.9022
-2.2254	2.5742	-64.554	-58.693	2.7337	1.0219	2.3204	4.9057
-2.2252	2.5745	-64.631	-58.91	2.724	1.0134	2.3223	4.909
-2.225	2.5747	-64.658	-59.044	2.7142	1.0049	2.3241	4.9121
-2.2248	2.5749	-64.545	-59.325	2.7043	0.99647	2.3258	4.915
-2.2246	2.5752	-64.658	-59.374	2.6944	0.98808	2.3363	4.9177
-2.2244	2.5754	-64.506	-59.52	2.6844	0.97974	2.3382	4.9202
-2.2242	2.5756	-64.631	-59.667	2.6743	0.97144	2.3399	4.9225
-2.224	2.5758	-64.896	-59.844	2.6642	0.9632	2.3415	4.9246
-2.2238	2.5761	-64.805	-59.951	2.654	0.95501	2.3431	4.9265
-2.2236	2.5763	-64.695	-60.118	2.6437	0.94687	2.3446	4.9281
-2.2234	2.5765	-64.841	-60.182	2.6333	0.93879	2.3461	4.9295
-2.2232	2.5768	-64.808	-60.363	2.6229	0.93077	2.3474	4.9234
-2.223	2.577	-64.866	-60.317	2.6124	0.92281	2.3487	4.9246
-2.2228	2.5772	-64.872	-60.35	2.6019	0.91491	2.35	4.9255
-2.2226	2.5775	-64.808	-60.561	2.5913	0.90708	2.3511	4.9262
-2.2224	2.5777	-64.96	-60.536	2.5806	0.89931	2.3522	4.9267
-2.2222	2.5779	-64.857	-60.68	2.5699	0.89161	2.3532	4.9269
-2.222	2.5782	-64.954	-60.829	2.5591	0.88397	2.3541	4.9269
-2.2218	2.5784	-64.951	-60.72	2.5482	0.87641	2.355	4.9267
-2.2216	2.5786	-64.905	-60.86	2.5373	0.86892	2.3558	4.9262
-2.2214	2.5788	-65.107	-60.506	2.5264	0.86151	2.3565	4.9254
-2.2212	2.5791	-65.037	-60.475	2.5153	0.85417	2.3572	4.9244
-2.221	2.5793	-65.006	-60.326	2.5043	0.84692	2.3578	4.9232
-2.2208	2.5795	-65.076	-60.256	2.4934	0.83974	2.3583	4.9216
-2.2206	2.5798	-65.055	-60.036	2.4822	0.83264	2.3588	4.9199
-2.2204	2.58	-64.994	-60.234	2.471	0.82563	2.3592	4.9178
-2.2202	2.5802	-65.07	-60.164	2.4598	0.8187	2.3596	4.9155
-2.22	2.5805	-64.973	-60.363	2.4485	0.81186	2.3598	4.913
-2.2198	2.5807	-65.064	-60.347	2.4371	0.80511	2.3601	4.9102
-2.2196	2.5809	-65.067	-60.298	2.4257	0.79845	2.3602	4.9071
-2.2194	2.5812	-64.924	-60.408	2.4143	0.79187	2.3604	4.9037
-2.2192	2.5814	-64.881	-60.344	2.4028	0.7854	2.3604	4.9001
-2.219	2.5816	-64.789	-60.356	2.3913	0.77901	2.3604	4.9036
-2.2188	2.5819	-64.634	-60.39	2.3797	0.77273	2.3603	4.8997
-2.2186	2.5821	-64.588	-60.448	2.3681	0.76654	2.3602	4.8955
-2.2184	2.5823	-64.548	-60.546	2.3564	0.76045	2.3601	4.891
-2.2182	2.5826	-64.429	-60.359	2.3448	0.75446	2.3599	4.8863
-2.218	2.5828	-64.442	-60.237	2.3331	0.74858	2.3596	4.8813
-2.2178	2.583	-64.399	-60.051	2.3213	0.7428	2.3593	4.876
-2.2176	2.5833	-64.237	-59.972	2.3095	0.73712	2.3589	4.8705
-2.2174	2.5835	-64.374	-59.688	2.2977	0.73155	2.3585	4.8647
-2.2172	2.5837	-64.38	-59.389	2.2859	0.72609	2.358	4.8586
-2.217	2.5839	-64.329	-59.288	2.274	0.72073	2.3575	4.8523
-2.2168	2.5842	-64.115	-59.062	2.2621	0.71549	2.357	4.8457
-2.2166	2.5844	-64.054	-59.008	2.2502	0.71036	2.3564	4.8388
-2.2164	2.5846	-64.011	-58.821	2.2382	0.70534	2.3558	4.8316
-2.2162	2.5849	-64.182	-59.05	2.2263	0.70043	2.3551	4.8242
-2.216	2.5851	-64.173	-58.965	2.2143	0.69564	2.3435	4.8165
-2.2158	2.5853	-64.026	-58.882	2.2023	0.69097	2.3431	4.8086
-2.2156	2.5856	-64.24	-58.943	2.1902	0.68641	2.3426	4.8004
-2.2154	2.5858	-64.179	-58.907	2.1782	0.68197	2.3421	4.7919
-2.2152	2.586	-64.2	-59.047	2.1661	0.67765	2.3415	4.7831
-2.215	2.5863	-64.179	-59.185	2.1537	0.67345	2.3409	4.7741
-2.2148	2.5865	-64.225	-59.172	2.1416	0.66938	2.3403	4.7648
-2.2146	2.5867	-64.261	-59.267	2.1295	0.66542	2.3396	4.7552
-2.2144	2.587	-64.158	-59.462	2.1174	0.66159	2.3389	4.7454
-2.2142	2.5872	-64.2	-59.484	2.1052	0.65788	2.3381	4.7353
-2.214	2.5874	-64.411	-59.581	2.0931	0.6543	2.3373	4.725
-2.2138	2.5877	-64.24	-59.691	2.0809	0.65084	2.3365	4.7144
-2.2136	2.5879	-64.161	-60.021	2.0687	0.64751	2.3357	4.7035
-2.2134	2.5881	-64.277	-59.951	2.0565	0.64431	2.3348	4.6924
-2.2132	2.5884	-64.158	-59.993	2.0443	0.64124	2.3339	4.681
-2.213	2.5886	-64.402	-60.033	2.0321	0.63829	2.3329	4.6622
-2.2128	2.5888	-64.203	-60.158	2.0199	0.63548	2.332	4.6505
-2.2126	2.5891	-64.078	-60.283	2.0077	0.6328	2.331	4.6386
-2.2124	2.5893	-64.149	-60.195	1.9955	0.63024	2.3299	4.6264
-2.2122	2.5895	-64.246	-60.186	1.9832	0.62782	2.3289	4.614
-2.212	2.5898	-64.081	-60.146	1.971	0.62553	2.3278	4.6013
-2.2118	2.59	-63.929	-60.134	1.9588	0.62337	2.3268	4.5884
-2.2116	2.5902	-64.06	-60.182	1.9465	0.62135	2.3257	4.5752
-2.2114	2.5905	-63.944	-60.063	1.9343	0.61894	2.3246	4.5618
-2.2112	2.5907	-63.886	-60.5	1.9221	0.61721	2.3234	4.5481
-2.211	2.5909	-63.825	-60.472	1.9098	0.6156	2.3223	4.5343
-2.2108	2.5912	-63.904	-60.265	1.8976	0.61413	2.3211	4.5201
-2.2106	2.5914	-64.054	-60.07	1.8854	0.6128	2.32	4.5058
-2.2104	2.5916	-63.978	-59.835	1.8732	0.6116	2.3188	4.4912
-2.2102	2.5919	-63.959	-59.709	1.861	0.61053	2.3176	4.4763
-2.21	2.5921	-63.904	-59.526	1.8488	0.6096	2.3164	4.4613
-2.2098	2.5923	-63.727	-59.267	1.8366	0.6088	2.3152	4.446
-2.2096	2.5926	-63.639	-59.322	1.8244	0.60814	2.314	4.4306
-2.2094	2.5928	-63.523	-59.615	1.8122	0.60762	2.3128	4.4149
-2.2092	2.593	-63.325	-59.316	1.8	0.60723	2.3115	4.3989
-2.209	2.5933	-63.218	-59.371	1.7879	0.60698	2.3103	4.3828
-2.2088	2.5935	-63.209	-59.23	1.7757	0.60686	2.3091	4.3665
-2.2086	2.5937	-62.958	-59.194	1.7636	0.60638	2.3079	4.35
-2.2084	2.594	-62.903	-59.429	1.7515	0.60655	2.3067	4.3333
-2.2082	2.5942	-63.111	-59.468	1.7394	0.60686	2.3054	4.3163
-2.208	2.5944	-63.23	-59.426	1.7273	0.6073	2.3042	4.2992
-2.2078	2.5947	-63.376	-59.227	1.7152	0.60788	2.303	4.2819
-2.2076	2.5949	-63.187	-59.108	1.7031	0.6086	2.3018	4.2645
-2.2074	2.5951	-63.38	-58.815	1.6911	0.60944	2.3006	4.2468
-2.2072	2.5954	-63.489	-58.919	1.6791	0.61043	2.2994	4.229
-2.207	2.5956	-63.428	-58.803	1.6671	0.61154	2.2982	4.211
-2.2068	2.5958	-63.514	-58.898	1.6551	0.61279	2.2971	4.1928
-2.2066	2.5961	-63.526	-58.76	1.6431	0.61418	2.2959	4.1744
-2.2064	2.5963	-63.657	-58.794	1.6312	0.61569	2.2948	4.1559
-2.2062	2.5965	-63.767	-59.105	1.6193	0.61734	2.2936	4.1373
-2.206	2.5968	-63.706	-59.032	1.6074	0.61912	2.2925	4.1185
-2.2058	2.597	-63.831	-58.785	1.5955	0.62103	2.2914	4.0922
-2.2056	2.5972	-63.834	-58.345	1.5837	0.62308	2.2903	4.0733
-2.2054	2.5975	-63.819	-58.226	1.5719	0.62525	2.2892	4.0543
-2.2052	2.5977	-63.55	-58.113	1.5601	0.62755	2.2881	4.0351
-2.205	2.598	-63.499	-58.004	1.5483	0.62999	2.2871	4.0158
-2.2048	2.5982	-63.361	-57.827	1.5366	0.63255	2.2861	3.9964
-2.2046	2.5984	-63.376	-58.025	1.5248	0.63524	2.2851	3.9768
-2.2044	2.5987	-63.465	-58.031	1.5132	0.63806	2.2841	3.9572
-2.2042	2.5989	-63.428	-58.135	1.5015	0.641	2.2831	3.9374
-2.204	2.5991	-63.364	-58.193	1.4899	0.64407	2.2822	3.9174
-2.2038	2.5994	-63.361	-58.388	1.4783	0.64727	2.2812	3.8974
-2.2036	2.5996	-63.367	-58.162	1.4667	0.65059	2.2803	3.8773
-2.2034	2.5998	-63.303	-58.165	1.4552	0.65403	2.2795	3.8571
-2.2032	2.6001	-63.404	-58.412	1.4437	0.6576	2.2786	3.8368
-2.203	2.6003	-63.26	-58.391	1.4322	0.66128	2.2778	3.8163
-2.2028	2.6005	-63.489	-58.547	1.4208	0.66509	2.277	3.7959
-2.2027	2.6008	-63.621	-58.632	1.4094	0.66902	2.2762	3.7753
-2.2025	2.601	-63.505	-58.611	1.3981	0.67306	2.2754	3.7546
-2.2023	2.6012	-63.66	-58.684	1.3867	0.67723	2.2747	3.7339
-2.2021	2.6015	-63.776	-58.654	1.3755	0.6815	2.274	3.7069
-2.2019	2.6017	-63.764	-58.626	1.3642	0.6859	2.2733	3.6863
-2.2017	2.6019	-63.975	-58.568	1.353	0.6904	2.2727	3.6655
[truncated: 12,303 more rows]

## Sheet: Fig5B
100	26.2	41.667	53.332	54.2	56	40.939	62.732	60.024	57.25	111.58
100	27	40.75	36.5	49.706	66	46.268	61	51.97	53.2	118.67
82.638	24	35.4	36	50.5	48.5	44.1	64.333	55.497	60.2	128.94
65.897	25.143	32.8	37	47.5	26	41.2	62.547	52.638	46.25	108.81
40.169	12.6	20.6	29.6	47.5	23.25	45.669	55.901	62.662	44.6	86.099
0	10.5	11.333	24	32.063	14.714	38.993	53.711	52.832	35.5	61.952

## Sheet: Fig5C
100	97.037	102.25	146.11	109.04	84.848	151.63	153.94	164.45	115.18	169.07
100	100	100	100	100	100	171.36	149.69	142.38	107.03	179.81
82.638	88.889	86.871	98.63	101.6	73.485	163.33	157.87	152.05	121.11	195.36
65.897	93.122	80.491	101.37	95.561	39.394	152.59	153.49	144.21	93.047	164.86
40.169	46.667	50.552	81.096	95.561	35.227	169.15	137.18	171.68	89.727	130.45
0	38.889	27.812	65.753	64.506	22.294	144.42	131.81	144.75	71.42	93.866

## Sheet: Fig5D
100	172.6	42.394	100	-27.175	8.2632	100	27.586	11.7
100	85.978	18.363	100	-31.112	6.6922	100	17.391	19.451
92.353	75.626	14.997	82.638	-40.836	7.5755	65	15.714	2.6708
84.185	62.818	10.527	65.897	-37.929	12.786	0	36.17	36.17
36.218	61.238	22.654	40.169	-50.963	14.831	NaN	NaN	NaN
6.8534	52.778	17.915	0	-58.495	12.927	NaN	NaN	NaN
0	30.967	12.167	NaN	NaN	NaN	NaN	NaN	NaN
