# Supplementary material for: Biophysics of object segmentation in a collision-detecting neuron
Source: eLife. 2018 Apr 18;7:e34238. doi: 10.7554/eLife.34238 (PMC5947989; doi:10.7554/eLife.34238)
Supplement: Figure 5—source data 2. [file elife-34238-fig5-data2.xlsx]

## Sheet: Fig5-S1A
100	19.25	36.8	28.4	45.5	40.833	15	30.6	20	7	33.75
65	23.5	41	22.667	10	40.167	22	30.667	19.667	10	34.75
0	20.333	31.667	16.6	19	24.5	19	23.5	11.667	3	23.75
100	24.5	38.2	26.333	35.667	35.333	16	28	23.667	24	37.25

## Sheet: Fig5-S1B
0.026683	0.00087379
0.092977	0.10595
0.14489	0.11835
0.24408	0.078544
0.20314	0.13874
