# Supplementary material for: Biophysics of object segmentation in a collision-detecting neuron
Source: eLife. 2018 Apr 18;7:e34238. doi: 10.7554/eLife.34238 (PMC5947989; doi:10.7554/eLife.34238)
Supplement: Figure 6—source data 1. [file elife-34238-fig6-data1.xlsx]

## Sheet: Fig6B
7.6306	-59.617	2	-62.794
2	-59.231	7.6306	-62.367
6.8172	-59.842	6.8172	-62.961
32.435	-59.997	2	-61.521
13.618	-59.112	32.435	-66.776
22.865	-59.651	13.618	-62.923
2	-56.945	22.865	-63.036
44.224	-59.248	2	-61.544
21.332	-59.643	44.224	-63.85
2	-58.42	21.332	-60.241
22.865	-60.308	19.184	-62.83
19.184	-59.351	3.0322	-61.953
23.618	-60.182	22.865	-69.816
8.7347	-60.368	22.865	-63.457
10.167	-59.553	11.153	-61.007
2	-59.237	NaN	NaN
8.0882	-59.021	NaN	NaN
9.7073	-59.639	NaN	NaN
22.865	-60.849	NaN	NaN
2	-58.577	NaN	NaN
22.865	-58.204	NaN	NaN
16.853	-60.237	NaN	NaN
2	-60.246	NaN	NaN
27.395	-60.503	NaN	NaN
8.2538	-59.684	NaN	NaN
25.69	-57.407	NaN	NaN
7.37	-60.526	NaN	NaN
22.865	-59.572	NaN	NaN
2	-60.019	NaN	NaN
65.479	-59.141	NaN	NaN
27.395	-60.121	NaN	NaN
8.2538	-60.464	NaN	NaN
22.865	-60.167	NaN	NaN
2	-60.105	NaN	NaN
25.69	-60.092	NaN	NaN
7.37	-60.296	NaN	NaN
65.479	-60.109	NaN	NaN
22.865	-60.24	NaN	NaN
16.418	-60.164	NaN	NaN
13.943	-60.011	NaN	NaN
20.97	-60.333	NaN	NaN
2	-60.543	NaN	NaN
9.7131	-60.41	NaN	NaN
2	-60.432	NaN	NaN
9.1064	-60.266	NaN	NaN
2	-60.142	NaN	NaN
19.053	-60.498	NaN	NaN
25.628	-60.648	NaN	NaN
14.725	-60.078	NaN	NaN
22.865	-60.894	NaN	NaN
38.848	-59.888	NaN	NaN
11.473	-59.87	NaN	NaN
2	-60.603	NaN	NaN
19.589	-59.954	NaN	NaN
9.4326	-60.104	NaN	NaN
8.5538	-60.303	NaN	NaN
40.809	-59.893	NaN	NaN
9.8501	-60.069	NaN	NaN
15.373	-60.187	NaN	NaN
34.448	-60.464	NaN	NaN
22.865	-59.576	NaN	NaN
10.773	-60.064	NaN	NaN
22.865	-58.748	NaN	NaN
40.931	-60.569	NaN	NaN
2	-59.558	NaN	NaN
22.225	-60.167	NaN	NaN
2	-60.007	NaN	NaN
26.154	-58.056	NaN	NaN
2	-58.528	NaN	NaN
24.34	-60.142	NaN	NaN
8.0467	-58.796	NaN	NaN
22.865	-60.302	NaN	NaN
9.3593	-59.987	NaN	NaN
17.223	-59.7	NaN	NaN
22.865	-60.081	NaN	NaN
45.482	-60.591	NaN	NaN
22.865	-58.717	NaN	NaN
6.7406	-59.335	NaN	NaN
3.0322	-60.467	NaN	NaN
2	-58.41	NaN	NaN
24.676	-61.051	NaN	NaN
17.196	-58.477	NaN	NaN
22.865	-59.582	NaN	NaN
2	-57.716	NaN	NaN
2	-60.073	NaN	NaN
11.091	-60.544	NaN	NaN
22.865	-60.096	NaN	NaN
9.6896	-59.518	NaN	NaN
31.072	-58.999	NaN	NaN
32.581	-59.474	NaN	NaN
18.374	-59.183	NaN	NaN
28.517	-59.166	NaN	NaN
8.6302	-61.414	NaN	NaN
2	-60.308	NaN	NaN
26.154	-60.629	NaN	NaN
24.34	-60.472	NaN	NaN
8.0467	-59.939	NaN	NaN
9.3593	-60.02	NaN	NaN
22.865	-60.246	NaN	NaN
15.606	-59.342	NaN	NaN
2	-59.421	NaN	NaN
22.865	-59.748	NaN	NaN
12.768	-60.032	NaN	NaN
35.962	-60.293	NaN	NaN
31.415	-60.151	NaN	NaN
17.717	-60.079	NaN	NaN
22.865	-59.741	NaN	NaN
45.286	-60.081	NaN	NaN
6.5831	-59.046	NaN	NaN
26.154	-60.534	NaN	NaN
24.34	-60.072	NaN	NaN
8.0467	-59.966	NaN	NaN
9.3593	-60.3	NaN	NaN
22.865	-60.247	NaN	NaN
2	-59.487	NaN	NaN
15.606	-60.348	NaN	NaN
22.865	-59.922	NaN	NaN
12.768	-60.308	NaN	NaN
35.962	-59.803	NaN	NaN
2	-59.998	NaN	NaN
22.865	-60.337	NaN	NaN
31.415	-59.429	NaN	NaN
2	-59.664	NaN	NaN
9.7131	-59.99	NaN	NaN
11.526	-60.344	NaN	NaN
5.7785	-60.211	NaN	NaN
23.89	-60.074	NaN	NaN
28.041	-60.107	NaN	NaN
2	-60.632	NaN	NaN
20.254	-60.24	NaN	NaN
22.865	-60.33	NaN	NaN
20.143	-60.232	NaN	NaN
32.729	-60.121	NaN	NaN
6.2665	-60.137	NaN	NaN
20.032	-59.965	NaN	NaN
22.865	-59.856	NaN	NaN
21.183	-59.858	NaN	NaN
37.982	-60.187	NaN	NaN
2	-60.539	NaN	NaN
23.265	-59.816	NaN	NaN
35.58	-60.348	NaN	NaN
9.0582	-60.517	NaN	NaN
11.883	-60.104	NaN	NaN
22.865	-60.3	NaN	NaN
2	-59.872	NaN	NaN

## Sheet: Fig6C
0.82414	-0.39346	1.0458	-0.033293
0.72814	-0.28941	0.90458	0.062883
0.73511	-0.41052	0.70524	-0.026413
0.83938	-0.52665	0.75244	-0.15006
0.85357	-0.6117	0.70167	-0.13849
0.72204	-0.22092	0.68119	-0.12998

## Sheet: Fig6D
-2.58	-0.089223	-0.0050218
-1.66	-0.13539	0.018663
-0.76	-0.57724	-0.029729
-0.5	-1.5128	-0.27484
-0.37	-2.2051	-0.35725
-0.275	-5.4084	-2.897

## Sheet: Fig6E
-0.084201
-0.15405
-0.54751
-1.238
-1.8478
-2.5115
