# Supplementary material for: Biophysics of object segmentation in a collision-detecting neuron
Source: eLife. 2018 Apr 18;7:e34238. doi: 10.7554/eLife.34238 (PMC5947989; doi:10.7554/eLife.34238)
Supplement: Figure 7—source data 1. — Rich media files. [file elife-34238-fig7-data1.xlsx]

## Sheet: Fig7A
-5.1827	-32.282	-32.198	0	0
-5.1822	-64.573	-64.426	0	0
-5.1817	-64.573	-64.447	0	0
-5.1812	-64.573	-64.447	0	0
-5.1807	-64.573	-64.447	0	0
-5.1802	-64.573	-64.447	0	0
-5.1797	-64.573	-64.447	0	0
-5.1792	-64.573	-64.447	0	0
-5.1787	-64.573	-64.447	0	0
-5.1782	-64.573	-64.447	0	0
-5.1777	-64.573	-64.447	0	0
-5.1772	-64.474	-64.408	0	0
-5.1767	-64.311	-64.386	0	0
-5.1762	-64.311	-64.381	0	0
-5.1757	-64.311	-64.344	0	0
-5.1752	-64.311	-64.314	0	0
-5.1747	-64.311	-64.314	0	0
-5.1742	-64.311	-64.314	0	0
-5.1737	-64.311	-64.314	0	0
-5.1732	-64.311	-64.295	0	0
-5.1727	-64.311	-64.285	0	0
-5.1722	-64.311	-64.268	0	0
-5.1717	-64.314	-64.268	0	0
-5.1712	-64.327	-64.268	0	0
-5.1707	-64.331	-64.287	0	0
-5.1702	-64.336	-64.3	0	0
-5.1697	-64.344	-64.316	0	0
-5.1692	-64.352	-64.324	0	0
-5.1687	-64.359	-64.333	0	0
-5.1682	-64.371	-64.345	0	0
-5.1677	-64.386	-64.362	0	0
-5.1672	-64.4	-64.377	0	0
-5.1667	-64.451	-64.412	0	0
-5.1662	-64.528	-64.5	0	0
-5.1657	-64.535	-64.531	0	0
-5.1652	-64.544	-64.553	0	0
-5.1647	-64.554	-64.578	0	0
-5.1642	-64.58	-64.59	0	0
-5.1637	-64.609	-64.616	0	0
-5.1632	-64.639	-64.638	0	0
-5.1627	-64.675	-64.707	0	0
-5.1622	-64.739	-64.771	0	0
-5.1617	-64.758	-64.827	0	0
-5.1612	-64.781	-64.879	0	0
-5.1607	-64.807	-64.896	0	0
-5.1602	-64.833	-64.909	0	0
-5.1597	-64.86	-64.92	0	0
-5.1592	-64.867	-64.926	0	0
-5.1587	-64.88	-64.934	0	0
-5.1582	-64.895	-64.936	0	0
-5.1577	-64.911	-64.936	0	0
-5.1572	-64.934	-64.942	0	0
-5.1567	-64.955	-64.948	0	0
-5.1562	-64.959	-64.957	0	0
-5.1557	-64.965	-64.968	0	0
-5.1552	-64.968	-64.973	0	0
-5.1547	-64.968	-64.973	0	0
-5.1542	-64.968	-64.973	0	0
-5.1537	-64.968	-64.972	0	0
-5.1532	-64.964	-64.96	0	0
-5.1527	-64.962	-64.949	0	0
-5.1522	-64.962	-64.948	0	0
-5.1517	-64.962	-64.948	0	0
-5.1512	-64.962	-64.932	0	0
-5.1507	-64.957	-64.915	0	0
-5.1502	-64.86	-64.895	0	0
-5.1497	-64.838	-64.863	0	0
-5.1492	-64.792	-64.829	0	0
-5.1487	-64.741	-64.734	0	0
-5.1482	-64.715	-64.705	0	0
-5.1477	-64.686	-64.672	0	0
-5.1472	-64.679	-64.664	0	0
-5.1467	-64.673	-64.661	0	0
-5.1462	-64.663	-64.644	0	0
-5.1457	-64.653	-64.638	0	0
-5.1452	-64.648	-64.638	0	0
-5.1447	-64.642	-64.632	0	0
-5.1442	-64.629	-64.624	0	0
-5.1437	-64.615	-64.609	0	0
-5.1432	-64.613	-64.605	0	0
-5.1427	-64.613	-64.605	0	0
-5.1422	-64.61	-64.601	0	0
-5.1417	-64.594	-64.583	0	0
-5.1412	-64.582	-64.568	0	0
-5.1407	-64.567	-64.563	0	0
-5.1402	-64.567	-64.566	0	0
-5.1397	-64.553	-64.565	0	0
-5.1392	-64.536	-64.558	0	0
-5.1387	-64.518	-64.565	0	0
-5.1382	-64.502	-64.558	0	0
-5.1377	-64.487	-64.549	0	0
-5.1372	-64.479	-64.544	0	0
-5.1367	-64.469	-64.534	0	0
-5.1362	-64.456	-64.52	0	0
-5.1357	-64.44	-64.505	0	0
-5.1352	-64.426	-64.492	0	0
-5.1347	-64.421	-64.481	0	0
-5.1342	-64.421	-64.481	0	0
-5.1337	-64.43	-64.484	0	0
-5.1332	-64.434	-64.489	0	0
-5.1327	-64.439	-64.482	0	0
-5.1322	-64.452	-64.48	0	0
-5.1317	-64.452	-64.48	0	0
-5.1312	-64.45	-64.475	0	0
-5.1307	-64.45	-64.452	0	0
-5.1302	-64.45	-64.438	0	0
-5.1297	-64.45	-64.432	0	0
-5.1292	-64.45	-64.432	0	0
-5.1287	-64.45	-64.432	0	0
-5.1282	-64.469	-64.432	0	0
-5.1277	-64.48	-64.432	0	0
-5.1272	-64.485	-64.432	0	0
-5.1267	-64.492	-64.432	0	0
-5.1262	-64.499	-64.453	0	0
-5.1257	-64.516	-64.48	0	0
-5.1252	-64.545	-64.514	0	0
-5.1247	-64.578	-64.54	0	0
-5.1242	-64.592	-64.551	0	0
-5.1237	-64.615	-64.566	0	0
-5.1232	-64.644	-64.593	0	0
-5.1227	-64.672	-64.622	0	0
-5.1222	-64.698	-64.65	0	0
-5.1217	-64.724	-64.676	0	0
-5.1212	-64.747	-64.699	0	0
-5.1207	-64.781	-64.746	0	0
-5.1202	-64.826	-64.793	0	0
-5.1197	-64.865	-64.835	0	0
-5.1192	-64.88	-64.861	0	0
-5.1187	-64.88	-64.862	0	0
-5.1182	-64.88	-64.862	0	0
-5.1177	-64.88	-64.862	0	0
-5.1172	-64.881	-64.863	0	0
-5.1167	-64.889	-64.87	0	0
-5.1162	-64.9	-64.879	0	0
-5.1157	-64.906	-64.883	0	0
-5.1152	-64.906	-64.883	0	0
-5.1147	-64.906	-64.883	0	0
-5.1142	-64.906	-64.883	0	0
-5.1137	-64.895	-64.874	0	0
-5.1132	-64.884	-64.864	0	0
-5.1127	-64.884	-64.863	0	0
-5.1122	-64.884	-64.863	0	0
-5.1117	-64.884	-64.863	0	0
-5.1112	-64.884	-64.863	0	0
-5.1107	-64.884	-64.863	0	0
-5.1102	-64.894	-64.873	0	0
-5.1097	-64.9	-64.874	0	0
-5.1092	-64.904	-64.874	0	0
-5.1087	-64.927	-64.895	0	0
-5.1082	-64.95	-64.92	0	0
-5.1077	-64.972	-64.943	0	0
-5.1072	-64.997	-64.965	0	0
-5.1067	-65.052	-65.022	0	0
-5.1062	-65.102	-65.075	0	0
-5.1057	-65.15	-65.124	0	0
-5.1052	-65.203	-65.18	0	0
-5.1047	-65.27	-65.249	0	0
-5.1042	-65.283	-65.264	0	0
-5.1037	-65.292	-65.283	0	0
-5.1032	-65.292	-65.283	0	0
-5.1027	-65.292	-65.283	0	0
-5.1022	-65.292	-65.283	0	0
-5.1017	-65.292	-65.283	0	0
-5.1012	-65.292	-65.283	0	0
-5.1007	-65.292	-65.283	0	0
-5.1002	-65.292	-65.283	0	0
-5.0997	-65.292	-65.283	0	0
-5.0992	-65.277	-65.27	0	0
-5.0987	-65.231	-65.255	0	0
-5.0982	-65.23	-65.25	0	0
-5.0977	-65.23	-65.25	0	0
-5.0972	-65.23	-65.25	0	0
-5.0967	-65.23	-65.25	0	0
-5.0962	-65.23	-65.25	0	0
-5.0957	-65.222	-65.25	0	0
-5.0952	-65.217	-65.243	0	0
-5.0947	-65.214	-65.24	0	0
-5.0942	-65.209	-65.232	0	0
-5.0937	-65.203	-65.226	0	0
-5.0932	-65.183	-65.203	0	0
-5.0927	-65.153	-65.177	0	0
-5.0922	-65.143	-65.168	0	0
-5.0917	-65.143	-65.168	0	0
-5.0912	-65.143	-65.168	0	0
-5.0907	-65.143	-65.168	0	0
-5.0902	-65.143	-65.168	0	0
-5.0897	-65.149	-65.171	0	0
-5.0892	-65.149	-65.171	0	0
-5.0887	-65.149	-65.171	0	0
-5.0882	-65.124	-65.14	0	0
-5.0877	-65.107	-65.124	0	0
-5.0872	-65.087	-65.104	0	0
-5.0867	-65.072	-65.086	0	0
-5.0862	-65.072	-65.084	0	0
-5.0857	-65.072	-65.084	0	0
-5.0852	-65.071	-65.081	0	0
-5.0847	-65.061	-65.067	0	0
-5.0842	-65.061	-65.064	0	0
-5.0837	-65.061	-65.061	0	0
-5.0832	-65.042	-65.04	0	0
-5.0827	-65.022	-65.019	0	0
-5.0822	-65.013	-65.01	0	0
-5.0817	-65.013	-65.01	0	0
-5.0812	-65.013	-65.01	0	0
-5.0807	-65.002	-64.991	0	0
-5.0802	-64.983	-64.973	0	0
-5.0797	-64.804	-64.875	0	0
-5.0792	-64.774	-64.811	0	0
-5.0787	-64.733	-64.795	0	0
-5.0782	-64.709	-64.671	0	0
-5.0777	-64.677	-64.638	0	0
-5.0772	-64.646	-64.612	0	0
-5.0767	-64.633	-64.592	0	0
-5.0762	-64.619	-64.571	0	0
-5.0757	-64.606	-64.55	0	0
-5.0752	-64.598	-64.527	0	0
-5.0747	-64.57	-64.513	0	0
-5.0742	-64.546	-64.507	0	0
-5.0737	-64.524	-64.494	0	0
-5.0732	-64.499	-64.489	0	0
-5.0727	-64.5	-64.492	0	0
-5.0722	-64.519	-64.503	0	0
-5.0717	-64.538	-64.515	0	0
-5.0712	-64.554	-64.527	0	0
-5.0707	-64.577	-64.539	0	0
-5.0702	-64.598	-64.545	0	0
-5.0697	-64.559	-64.545	0	0
-5.0692	-64.539	-64.533	0	0
-5.0687	-64.516	-64.523	0	0
-5.0682	-64.492	-64.523	0	0
-5.0677	-64.469	-64.499	0	0
-5.0672	-64.454	-64.478	0	0
-5.0667	-64.44	-64.467	0	0
-5.0662	-64.453	-64.478	0	0
-5.0657	-64.467	-64.497	0	0
-5.0652	-64.486	-64.5	0	0
-5.0647	-64.491	-64.497	0	0
-5.0642	-64.498	-64.503	0	0
-5.0637	-64.532	-64.523	0	0
-5.0632	-64.547	-64.544	0	0
-5.0627	-64.558	-64.562	0	0
-5.0622	-64.56	-64.562	0	0
-5.0617	-64.56	-64.562	0	0
-5.0612	-64.56	-64.562	0	0
-5.0607	-64.56	-64.562	0	0
-5.0602	-64.56	-64.562	0	0
-5.0597	-64.575	-64.562	0	0
-5.0592	-64.635	-64.618	0	0
-5.0587	-64.699	-64.695	0	0
-5.0582	-64.758	-64.76	0	0
-5.0577	-64.811	-64.814	0	0
-5.0572	-64.857	-64.829	0	0
-5.0567	-64.887	-64.843	0	0
-5.0562	-64.887	-64.846	0	0
-5.0557	-64.887	-64.846	0	0
-5.0552	-64.887	-64.846	0	0
-5.0547	-64.887	-64.846	0	0
-5.0542	-64.887	-64.846	0	0
-5.0537	-64.887	-64.846	0	0
-5.0532	-64.887	-64.846	0	0
-5.0527	-64.887	-64.846	0	0
-5.0522	-64.887	-64.841	0	0
-5.0517	-64.842	-64.826	0	0
-5.0512	-64.694	-64.708	0	0
-5.0507	-64.543	-64.533	0	0
-5.0502	-64.515	-64.506	0	0
-5.0497	-64.47	-64.462	0	0
-5.0492	-64.47	-64.462	0	0
-5.0487	-64.47	-64.462	0	0
-5.0482	-64.47	-64.462	0	0
-5.0477	-64.47	-64.462	0	0
-5.0472	-64.47	-64.45	0	0
-5.0467	-64.47	-64.439	0	0
-5.0462	-64.47	-64.439	0	0
-5.0457	-64.49	-64.445	0	0
-5.0452	-64.536	-64.468	0	0
-5.0447	-64.577	-64.494	0	0
-5.0442	-64.584	-64.519	0	0
-5.0437	-64.586	-64.53	0	0
-5.0432	-64.586	-64.53	0	0
-5.0427	-64.586	-64.53	0	0
-5.0422	-64.586	-64.542	0	0
-5.0417	-64.596	-64.558	0	0
-5.0412	-64.608	-64.575	0	0
-5.0407	-64.619	-64.585	0	0
-5.0402	-64.635	-64.596	0	0
-5.0397	-64.65	-64.614	0	0
-5.0392	-64.655	-64.632	0	0
-5.0387	-64.653	-64.617	0	0
-5.0382	-64.639	-64.614	0	0
-5.0377	-64.621	-64.613	0	0
-5.0372	-64.605	-64.613	0	0
-5.0367	-64.606	-64.621	0	0
-5.0362	-64.623	-64.633	0	0
-5.0357	-64.638	-64.638	0	0
-5.0352	-64.638	-64.625	0	0
-5.0347	-64.638	-64.615	0	0
-5.0342	-64.629	-64.615	0	0
-5.0337	-64.625	-64.614	0	0
-5.0332	-64.625	-64.614	0	0
-5.0327	-64.634	-64.621	0	0
-5.0322	-64.648	-64.631	0	0
-5.0317	-64.655	-64.639	0	0
-5.0312	-64.657	-64.639	0	0
-5.0307	-64.657	-64.639	0	0
-5.0302	-64.657	-64.639	0	0
-5.0297	-64.657	-64.639	0	0
-5.0292	-64.657	-64.639	0	0
-5.0287	-64.669	-64.648	0	0
-5.0282	-64.682	-64.663	0	0
-5.0277	-64.696	-64.688	0	0
-5.0272	-64.712	-64.71	0	0
-5.0267	-64.759	-64.755	0	0
-5.0262	-64.79	-64.799	0	0
-5.0257	-64.81	-64.829	0	0
-5.0252	-64.834	-64.841	0	0
-5.0247	-64.856	-64.857	0	0
-5.0242	-64.878	-64.874	0	0
-5.0237	-64.897	-64.891	0	0
-5.0232	-64.914	-64.909	0	0
-5.0227	-64.93	-64.924	0	0
-5.0222	-64.945	-64.94	0	0
-5.0217	-64.957	-64.945	0	0
-5.0212	-64.957	-64.945	0	0
-5.0207	-64.957	-64.945	0	0
-5.0202	-64.957	-64.945	0	0
-5.0197	-64.957	-64.945	0	0
-5.0192	-64.957	-64.945	0	0
-5.0187	-64.948	-64.926	0	0
-5.0182	-64.924	-64.902	0	0
-5.0177	-64.892	-64.88	0	0
-5.0172	-64.851	-64.85	0	0
-5.0167	-64.8	-64.83	0	0
-5.0162	-64.713	-64.719	0	0
-5.0157	-64.695	-64.702	0	0
-5.0152	-64.677	-64.685	0	0
-5.0147	-64.659	-64.667	0	0
-5.0142	-64.639	-64.648	0	0
-5.0137	-64.618	-64.629	0	0
-5.0132	-64.595	-64.613	0	0
-5.0127	-64.573	-64.6	0	0
-5.0122	-64.553	-64.575	0	0
-5.0117	-64.538	-64.531	0	0
-5.0112	-64.522	-64.488	0	0
-5.0107	-64.438	-64.468	0	0
-5.0102	-64.359	-64.402	0	0
-5.0097	-64.314	-64.363	0	0
-5.0092	-64.268	-64.318	0	0
-5.0087	-64.24	-64.28	0	0
-5.0082	-64.212	-64.25	0	0
-5.0077	-64.19	-64.23	0	0
-5.0072	-64.166	-64.221	0	0
-5.0067	-64.157	-64.221	0	0
-5.0062	-64.157	-64.221	0	0
-5.0057	-64.157	-64.221	0	0
-5.0052	-64.157	-64.221	0	0
-5.0047	-64.157	-64.221	0	0
-5.0042	-64.157	-64.221	0	0
-5.0037	-64.157	-64.221	0	0
-5.0032	-64.157	-64.221	0	0
-5.0027	-64.17	-64.228	0	0
-5.0022	-64.2	-64.253	0	0
-5.0017	-64.253	-64.286	0	0
-5.0012	-64.313	-64.329	0	0
-5.0007	-64.313	-64.329	0	0
-5.0002	-64.313	-64.329	0	0
-4.9997	-64.319	-64.333	0	0
-4.9992	-64.349	-64.365	0	0
-4.9987	-64.368	-64.388	0	0
-4.9982	-64.377	-64.388	0	0
-4.9977	-64.377	-64.389	0	0
-4.9972	-64.391	-64.402	0	0
-4.9967	-64.406	-64.416	0	0
-4.9962	-64.423	-64.432	0	0
-4.9957	-64.438	-64.451	0	0
-4.9952	-64.441	-64.455	0	0
-4.9947	-64.441	-64.455	0	0
-4.9942	-64.441	-64.455	0	0
-4.9937	-64.441	-64.455	0	0
-4.9932	-64.441	-64.455	0	0
-4.9927	-64.448	-64.455	0	0
-4.9922	-64.476	-64.513	0	0
-4.9917	-64.523	-64.562	0	0
-4.9912	-64.544	-64.58	0	0
-4.9907	-64.555	-64.594	0	0
-4.9902	-64.557	-64.596	0	0
-4.9897	-64.557	-64.596	0	0
-4.9892	-64.557	-64.596	0	0
-4.9887	-64.557	-64.596	0	0
-4.9882	-64.561	-64.596	0	0
-4.9877	-64.574	-64.602	0	0
-4.9872	-64.588	-64.614	0	0
-4.9867	-64.601	-64.624	0	0
-4.9862	-64.605	-64.628	0	0
-4.9857	-64.63	-64.636	0	0
-4.9852	-64.66	-64.663	0	0
-4.9847	-64.683	-64.69	0	0
-4.9842	-64.702	-64.715	0	0
-4.9837	-64.72	-64.723	0	0
-4.9832	-64.728	-64.733	0	0
-4.9827	-64.741	-64.743	0	0
-4.9822	-64.741	-64.743	0	0
-4.9817	-64.741	-64.743	0	0
-4.9812	-64.741	-64.743	0	0
-4.9807	-64.742	-64.735	0	0
-4.9802	-64.742	-64.735	0	0
-4.9797	-64.742	-64.735	0	0
-4.9792	-64.742	-64.735	0	0
-4.9787	-64.742	-64.735	0	0
-4.9782	-64.742	-64.735	0	0
-4.9777	-64.742	-64.735	0	0
-4.9772	-64.742	-64.735	0	0
-4.9767	-64.742	-64.733	0	0
-4.9762	-64.721	-64.717	0	0
-4.9757	-64.616	-64.551	0	0
-4.9752	-64.595	-64.53	0	0
-4.9747	-64.584	-64.53	0	0
-4.9742	-64.553	-64.53	0	0
-4.9737	-64.518	-64.524	0	0
-4.9732	-64.489	-64.504	0	0
-4.9727	-64.473	-64.484	0	0
-4.9722	-64.455	-64.47	0	0
-4.9717	-64.443	-64.461	0	0
-4.9712	-64.424	-64.452	0	0
-4.9707	-64.403	-64.443	0	0
-4.9702	-64.387	-64.434	0	0
-4.9697	-64.375	-64.391	0	0
-4.9692	-64.366	-64.366	0	0
-4.9687	-64.35	-64.359	0	0
-4.9682	-64.347	-64.359	0	0
-4.9677	-64.313	-64.356	0	0
-4.9672	-64.309	-64.284	0	0
-4.9667	-64.296	-64.25	0	0
-4.9662	-64.249	-64.218	0	0
-4.9657	-64.204	-64.191	0	0
-4.9652	-64.197	-64.17	0	0
-4.9647	-64.197	-64.167	0	0
-4.9642	-64.197	-64.167	0	0
-4.9637	-64.197	-64.167	0	0
-4.9632	-64.197	-64.167	0	0
-4.9627	-64.197	-64.167	0	0
-4.9622	-64.197	-64.167	0	0
-4.9617	-64.206	-64.179	0	0
-4.9612	-64.215	-64.186	0	0
-4.9607	-64.229	-64.194	0	0
-4.9602	-64.246	-64.205	0	0
-4.9597	-64.259	-64.207	0	0
-4.9592	-64.259	-64.207	0	0
-4.9587	-64.271	-64.241	0	0
-4.9582	-64.312	-64.315	0	0
-4.9577	-64.329	-64.348	0	0
-4.9572	-64.354	-64.36	0	0
-4.9567	-64.379	-64.372	0	0
-4.9562	-64.424	-64.413	0	0
-4.9557	-64.424	-64.413	0	0
-4.9552	-64.424	-64.413	0	0
-4.9547	-64.424	-64.413	0	0
-4.9542	-64.426	-64.419	0	0
-4.9537	-64.438	-64.436	0	0
-4.9532	-64.438	-64.436	0	0
-4.9527	-64.438	-64.436	0	0
-4.9522	-64.45	-64.45	0	0
-4.9517	-64.476	-64.476	0	0
-4.9512	-64.486	-64.506	0	0
-4.9507	-64.503	-64.526	0	0
-4.9502	-64.503	-64.527	0	0
-4.9497	-64.503	-64.514	0	0
-4.9492	-64.503	-64.514	0	0
-4.9487	-64.503	-64.514	0	0
-4.9482	-64.503	-64.514	0	0
-4.9477	-64.503	-64.514	0	0
-4.9472	-64.503	-64.514	0	0
-4.9467	-64.554	-64.514	0	0
-4.9462	-64.615	-64.532	0	0
-4.9457	-64.642	-64.565	0	0
-4.9452	-64.654	-64.597	0	0
-4.9447	-64.67	-64.629	0	0
-4.9442	-64.688	-64.658	0	0
-4.9437	-64.754	-64.716	0	0
-4.9432	-64.823	-64.795	0	0
-4.9427	-64.887	-64.864	0	0
-4.9422	-64.945	-64.924	0	0
-4.9417	-64.979	-64.943	0	0
-4.9412	-64.992	-64.961	0	0
-4.9407	-65.01	-64.981	0	0
-4.9402	-65.028	-65	0	0
-4.9397	-65.045	-65.019	0	0
-4.9392	-65.06	-65.035	0	0
-4.9387	-65.075	-65.051	0	0
-4.9382	-65.088	-65.065	0	0
-4.9377	-65.1	-65.079	0	0
-4.9372	-65.111	-65.091	0	0
-4.9367	-65.119	-65.095	0	0
-4.9362	-65.119	-65.095	0	0
-4.9357	-65.119	-65.095	0	0
-4.9352	-65.119	-65.095	0	0
-4.9347	-65.11	-65.079	0	0
-4.9342	-65.093	-65.058	0	0
-4.9337	-65.075	-65.038	0	0
-4.9332	-65.062	-65.023	0	0
-4.9327	-65.051	-65.014	0	0
-4.9322	-65.051	-65.014	0	0
-4.9317	-65.051	-65.014	0	0
-4.9312	-65.051	-64.999	0	0
-4.9307	-65.035	-64.997	0	0
-4.9302	-65.035	-64.997	0	0
-4.9297	-65.035	-64.997	0	0
-4.9292	-65.035	-64.997	0	0
-4.9287	-65.035	-64.997	0	0
-4.9282	-65.035	-64.997	0	0
-4.9277	-65.028	-64.997	0	0
-4.9272	-65.018	-64.988	0	0
-4.9267	-65.01	-64.987	0	0
-4.9262	-65.008	-64.994	0	0
-4.9257	-65.013	-65.002	0	0
-4.9252	-65.013	-65.011	0	0
-4.9247	-65.013	-65.012	0	0
-4.9242	-65.018	-65.015	0	0
-4.9237	-65.018	-65.015	0	0
-4.9232	-65.018	-65.015	0	0
-4.9227	-65.018	-65.015	0	0
-4.9222	-65.018	-65.015	0	0
-4.9217	-65.018	-65.015	0	0
-4.9212	-65.018	-65.015	0	0
-4.9207	-64.999	-65.007	0	0
-4.9202	-64.975	-64.992	0	0
-4.9197	-64.954	-64.984	0	0
-4.9192	-64.899	-64.793	0	0
-4.9187	-64.799	-64.712	0	0
-4.9182	-64.696	-64.696	0	0
-4.9177	-64.666	-64.666	0	0
-4.9172	-64.634	-64.637	0	0
-4.9167	-64.619	-64.61	0	0
-4.9162	-64.619	-64.609	0	0
-4.9157	-64.619	-64.609	0	0
-4.9152	-64.619	-64.609	0	0
-4.9147	-64.619	-64.609	0	0
-4.9142	-64.619	-64.609	0	0
-4.9137	-64.619	-64.609	0	0
-4.9132	-64.619	-64.612	0	0
-4.9127	-64.634	-64.632	0	0
-4.9122	-64.659	-64.653	0	0
-4.9117	-64.681	-64.671	0	0
-4.9112	-64.685	-64.671	0	0
-4.9107	-64.685	-64.671	0	0
-4.9102	-64.685	-64.671	0	0
-4.9097	-64.666	-64.642	0	0
-4.9092	-64.666	-64.622	0	0
-4.9087	-64.666	-64.635	0	0
-4.9082	-64.686	-64.659	0	0
-4.9077	-64.707	-64.682	0	0
-4.9072	-64.728	-64.705	0	0
-4.9067	-64.748	-64.728	0	0
-4.9062	-64.768	-64.749	0	0
-4.9057	-64.778	-64.77	0	0
-4.9052	-64.767	-64.776	0	0
-4.9047	-64.739	-64.76	0	0
-4.9042	-64.715	-64.747	0	0
-4.9037	-64.701	-64.713	0	0
-4.9032	-64.693	-64.687	0	0
-4.9027	-64.686	-64.687	0	0
-4.9022	-64.686	-64.687	0	0
-4.9017	-64.686	-64.692	0	0
-4.9012	-64.691	-64.708	0	0
-4.9007	-64.691	-64.708	0	0
-4.9002	-64.693	-64.714	0	0
-4.8997	-64.699	-64.728	0	0
-4.8992	-64.708	-64.742	0	0
-4.8987	-64.717	-64.752	0	0
-4.8982	-64.727	-64.752	0	0
-4.8977	-64.73	-64.758	0	0
-4.8972	-64.73	-64.758	0	0
-4.8967	-64.73	-64.758	0	0
-4.8962	-64.73	-64.758	0	0
-4.8957	-64.732	-64.758	0	0
-4.8952	-64.747	-64.764	0	0
-4.8947	-64.762	-64.78	0	0
-4.8942	-64.779	-64.796	0	0
-4.8937	-64.796	-64.811	0	0
-4.8932	-64.813	-64.825	0	0
-4.8927	-64.841	-64.854	0	0
-4.8922	-64.857	-64.859	0	0
-4.8917	-64.857	-64.859	0	0
-4.8912	-64.857	-64.859	0	0
-4.8907	-64.857	-64.859	0	0
-4.8902	-64.857	-64.859	0	0
-4.8897	-64.857	-64.859	0	0
-4.8892	-64.857	-64.859	0	0
-4.8887	-64.857	-64.845	0	0
-4.8882	-64.857	-64.845	0	0
-4.8877	-64.857	-64.845	0	0
-4.8872	-64.839	-64.82	0	0
-4.8867	-64.839	-64.82	0	0
-4.8862	-64.839	-64.82	0	0
-4.8857	-64.839	-64.82	0	0
-4.8852	-64.839	-64.82	0	0
-4.8847	-64.839	-64.82	0	0
-4.8842	-64.839	-64.82	0	0
-4.8837	-64.839	-64.82	0	0
-4.8832	-64.839	-64.82	0	0
-4.8827	-64.839	-64.82	0	0
-4.8822	-64.879	-64.864	0	0
-4.8817	-64.935	-64.922	0	0
-4.8812	-64.983	-64.971	0	0
-4.8807	-65.023	-65.012	0	0
-4.8802	-65.057	-65.047	0	0
-4.8797	-65.086	-65.076	0	0
-4.8792	-65.11	-65.101	0	0
-4.8787	-65.131	-65.123	0	0
-4.8782	-65.149	-65.141	0	0
-4.8777	-65.164	-65.157	0	0
-4.8772	-65.177	-65.171	0	0
-4.8767	-65.201	-65.195	0	0
-4.8762	-65.232	-65.227	0	0
-4.8757	-65.264	-65.26	0	0
-4.8752	-65.295	-65.29	0	0
-4.8747	-65.32	-65.317	0	0
-4.8742	-65.342	-65.338	0	0
-4.8737	-65.358	-65.355	0	0
-4.8732	-65.37	-65.367	0	0
-4.8727	-65.378	-65.376	0	0
-4.8722	-65.383	-65.381	0	0
-4.8717	-65.383	-65.381	0	0
-4.8712	-65.383	-65.381	0	0
-4.8707	-65.383	-65.381	0	0
-4.8702	-65.383	-65.381	0	0
-4.8697	-65.383	-65.381	0	0
-4.8692	-65.383	-65.381	0	0
-4.8687	-65.383	-65.381	0	0
-4.8682	-65.383	-65.381	0	0
-4.8677	-65.383	-65.381	0	0
-4.8672	-65.38	-65.381	0	0
-4.8667	-65.25	-65.302	0	0
-4.8662	-65.233	-65.292	0	0
-4.8657	-65.22	-65.29	0	0
-4.8652	-65.132	-65.158	0	0
-4.8647	-65.079	-65.101	0	0
-4.8642	-65.068	-65.095	0	0
-4.8637	-65.039	-64.962	0	0
-4.8632	-64.962	-64.952	0	0
-4.8627	-64.962	-64.952	0	0
-4.8622	-64.962	-64.952	0	0
-4.8617	-64.962	-64.952	0	0
-4.8612	-64.952	-64.944	0	0
-4.8607	-64.944	-64.932	0	0
-4.8602	-64.939	-64.918	0	0
-4.8597	-64.933	-64.91	0	0
-4.8592	-64.933	-64.91	0	0
-4.8587	-64.933	-64.91	0	0
-4.8582	-64.933	-64.917	0	0
-4.8577	-64.933	-64.927	0	0
-4.8572	-64.933	-64.928	0	0
-4.8567	-64.931	-64.923	0	0
-4.8562	-64.931	-64.923	0	0
-4.8557	-64.931	-64.923	0	0
-4.8552	-64.931	-64.923	0	0
-4.8547	-64.931	-64.923	0	0
-4.8542	-64.931	-64.923	0	0
-4.8537	-64.922	-64.899	0	0
-4.8532	-64.904	-64.877	0	0
-4.8527	-64.888	-64.86	0	0
-4.8522	-64.876	-64.828	0	0
-4.8517	-64.87	-64.784	0	0
-4.8512	-64.83	-64.727	0	0
-4.8507	-64.7	-64.633	0	0
-4.8502	-64.569	-64.593	0	0
-4.8497	-64.556	-64.573	0	0
-4.8492	-64.54	-64.556	0	0
-4.8487	-64.512	-64.533	0	0
-4.8482	-64.508	-64.525	0	0
-4.8477	-64.508	-64.525	0	0
-4.8472	-64.508	-64.525	0	0
-4.8467	-64.508	-64.525	0	0
-4.8462	-64.508	-64.525	0	0
-4.8457	-64.501	-64.508	0	0
-4.8452	-64.492	-64.491	0	0
-4.8447	-64.504	-64.496	0	0
-4.8442	-64.516	-64.514	0	0
-4.8437	-64.531	-64.527	0	0
-4.8432	-64.54	-64.527	0	0
-4.8427	-64.54	-64.527	0	0
-4.8422	-64.554	-64.548	0	0
-4.8417	-64.572	-64.572	0	0
-4.8412	-64.601	-64.596	0	0
-4.8407	-64.629	-64.615	0	0
-4.8402	-64.656	-64.625	0	0
-4.8397	-64.661	-64.639	0	0
-4.8392	-64.67	-64.654	0	0
-4.8387	-64.683	-64.67	0	0
-4.8382	-64.695	-64.685	0	0
-4.8377	-64.708	-64.7	0	0
-4.8372	-64.719	-64.714	0	0
-4.8367	-64.722	-64.714	0	0
-4.8362	-64.729	-64.723	0	0
-4.8357	-64.759	-64.754	0	0
-4.8352	-64.776	-64.761	0	0
-4.8347	-64.776	-64.761	0	0
-4.8342	-64.776	-64.761	0	0
-4.8337	-64.776	-64.761	0	0
-4.8332	-64.776	-64.761	0	0
-4.8327	-64.776	-64.761	0	0
-4.8322	-64.776	-64.761	0	0
-4.8317	-64.784	-64.77	0	0
-4.8312	-64.802	-64.788	0	0
-4.8307	-64.82	-64.807	0	0
-4.8302	-64.837	-64.824	0	0
-4.8297	-64.838	-64.815	0	0
-4.8292	-64.812	-64.787	0	0
-4.8287	-64.787	-64.758	0	0
-4.8282	-64.768	-64.742	0	0
-4.8277	-64.758	-64.727	0	0
-4.8272	-64.749	-64.712	0	0
-4.8267	-64.735	-64.712	0	0
-4.8262	-64.735	-64.712	0	0
-4.8257	-64.735	-64.712	0	0
-4.8252	-64.74	-64.718	0	0
-4.8247	-64.751	-64.731	0	0
-4.8242	-64.753	-64.743	0	0
-4.8237	-64.754	-64.756	0	0
-4.8232	-64.762	-64.775	0	0
-4.8227	-64.77	-64.791	0	0
-4.8222	-64.782	-64.798	0	0
-4.8217	-64.794	-64.808	0	0
-4.8212	-64.794	-64.818	0	0
-4.8207	-64.794	-64.818	0	0
-4.8202	-64.794	-64.818	0	0
-4.8197	-64.809	-64.836	0	0
-4.8192	-64.832	-64.854	0	0
-4.8187	-64.853	-64.873	0	0
-4.8182	-64.874	-64.88	0	0
-4.8177	-64.879	-64.88	0	0
-4.8172	-64.879	-64.88	0	0
-4.8167	-64.879	-64.88	0	0
-4.8162	-64.879	-64.88	0	0
-4.8157	-64.879	-64.88	0	0
-4.8152	-64.899	-64.887	0	0
-4.8147	-64.924	-64.902	0	0
-4.8142	-64.947	-64.908	0	0
-4.8137	-64.959	-64.92	0	0
-4.8132	-64.965	-64.934	0	0
-4.8127	-64.974	-64.947	0	0
-4.8122	-64.984	-64.954	0	0
-4.8117	-64.987	-64.954	0	0
-4.8112	-64.987	-64.954	0	0
-4.8107	-64.99	-64.975	0	0
-4.8102	-64.994	-64.994	0	0
-4.8097	-65.001	-65.011	0	0
-4.8092	-64.999	-65.011	0	0
-4.8087	-64.992	-64.979	0	0
-4.8082	-64.99	-64.973	0	0
-4.8077	-64.99	-64.973	0	0
-4.8072	-64.99	-64.973	0	0
-4.8067	-64.99	-64.973	0	0
-4.8062	-64.99	-64.973	0	0
-4.8057	-64.99	-64.973	0	0
-4.8052	-64.99	-64.973	0	0
-4.8047	-64.984	-64.965	0	0
-4.8042	-64.718	-64.702	0	0
-4.8037	-64.673	-64.672	0	0
-4.8032	-64.639	-64.645	0	0
-4.8027	-64.603	-64.613	0	0
-4.8022	-64.579	-64.586	0	0
-4.8017	-64.579	-64.586	0	0
-4.8012	-64.579	-64.586	0	0
-4.8007	-64.579	-64.586	0	0
-4.8002	-64.571	-64.579	0	0
-4.7997	-64.55	-64.554	0	0
-4.7992	-64.528	-64.528	0	0
-4.7987	-64.513	-64.513	0	0
-4.7982	-64.515	-64.515	0	0
-4.7977	-64.537	-64.536	0	0
-4.7972	-64.557	-64.557	0	0
-4.7967	-64.576	-64.577	0	0
-4.7962	-64.595	-64.597	0	0
-4.7957	-64.597	-64.61	0	0
-4.7952	-64.597	-64.61	0	0
-4.7947	-64.626	-64.632	0	0
-4.7942	-64.654	-64.661	0	0
-4.7937	-64.681	-64.688	0	0
-4.7932	-64.707	-64.713	0	0
-4.7927	-64.731	-64.735	0	0
-4.7922	-64.783	-64.783	0	0
-4.7917	-64.849	-64.85	0	0
-4.7912	-64.908	-64.908	0	0
-4.7907	-64.924	-64.918	0	0
-4.7902	-64.939	-64.934	0	0
-4.7897	-64.956	-64.953	0	0
-4.7892	-64.973	-64.97	0	0
-4.7887	-64.99	-64.986	0	0
-4.7882	-65.005	-65.003	0	0
-4.7877	-65.019	-65.006	0	0
-4.7872	-65.019	-65.006	0	0
-4.7867	-65.019	-65.006	0	0
-4.7862	-65.019	-65.006	0	0
-4.7857	-65.019	-65.009	0	0.0068955
-4.7852	-65.026	-65.017	0	0.0076169
-4.7847	-65.021	-65.012	0	0.0084086
-4.7842	-65.012	-65	0	0.0092766
-4.7837	-65.002	-64.989	0	0.010228
-4.7832	-64.992	-64.976	0	0.01127
-4.7827	-64.988	-64.973	0	0.01241
-4.7822	-64.988	-64.973	0	0.013657
-4.7817	-64.988	-64.973	0	0.01502
-4.7812	-64.981	-64.949	0.006793	0.023302
-4.7807	-64.966	-64.916	0.0075044	0.025638
-4.7802	-64.958	-64.892	0.0082851	0.028191
-4.7797	-64.891	-64.877	0.0091413	0.030979
-4.7792	-64.864	-64.864	0.01008	0.034021
-4.7787	-64.84	-64.856	0.011107	0.03734
-4.7782	-64.798	-64.76	0.012232	0.040957
-4.7777	-64.652	-64.546	0.013463	0.044896
-4.7772	-64.592	-64.53	0.014808	0.049184
-4.7767	-64.58	-64.51	0.016277	0.053848
-4.7762	-64.507	-64.497	0.01788	0.058919
-4.7757	-64.469	-64.485	0.01963	0.064426
-4.7752	-64.445	-64.477	0.021537	0.070405
-4.7747	-64.424	-64.47	0.023615	0.076891
-4.7742	-64.424	-64.435	0.033053	0.083923
-4.7737	-64.412	-64.415	0.036262	0.091542
-4.7732	-64.409	-64.402	0.039759	0.09979
-4.7727	-64.409	-64.402	0.043566	0.10871
-4.7722	-64.403	-64.39	0.047709	0.11836
-4.7717	-64.4	-64.375	0.052214	0.13582
-4.7712	-64.398	-64.372	0.057109	0.14782
-4.7707	-64.401	-64.382	0.062424	0.16077
-4.7702	-64.405	-64.396	0.068193	0.17476
-4.7697	-64.412	-64.407	0.074449	0.18984
-4.7692	-64.409	-64.397	0.081229	0.2061
-4.7687	-64.404	-64.384	0.088572	0.22362
-4.7682	-64.406	-64.384	0.09652	0.24248
-4.7677	-64.407	-64.384	0.10512	0.26278
-4.7672	-64.409	-64.384	0.11441	0.2846
-4.7667	-64.42	-64.394	0.12445	0.30805
-4.7662	-64.431	-64.407	0.13528	0.33322
-4.7657	-64.443	-64.414	0.14697	0.36024
-4.7652	-64.451	-64.423	0.15957	0.38921
-4.7647	-64.456	-64.431	0.17315	0.42025
-4.7642	-64.466	-64.442	0.18777	0.4535
-4.7637	-64.482	-64.461	0.20349	0.48909
-4.7632	-64.506	-64.477	0.2204	0.52715
-4.7627	-64.561	-64.538	0.23857	0.56782
-4.7622	-64.629	-64.607	0.25807	0.61127
-4.7617	-64.681	-64.663	0.279	0.65764
-4.7612	-64.681	-64.663	0.30145	0.70711
-4.7607	-64.681	-64.663	0.32549	0.75984
-4.7602	-64.681	-64.663	0.35125	0.81601
-4.7597	-64.681	-64.663	0.37881	0.8758
-4.7592	-64.681	-64.663	0.40828	0.93941
-4.7587	-64.681	-64.663	0.43977	1.007
-4.7582	-64.681	-64.663	0.47341	1.0789
-4.7577	-64.681	-64.663	0.50931	1.1552
-4.7572	-64.681	-64.663	0.54759	1.2361
-4.7567	-64.677	-64.657	0.58839	1.3219
-4.7562	-64.677	-64.657	0.63185	1.4128
-4.7557	-64.677	-64.657	0.6781	1.509
-4.7552	-64.677	-64.657	0.72729	1.6109
-4.7547	-64.677	-64.657	0.77958	1.7185
-4.7542	-64.677	-64.657	0.83511	1.8323
-4.7537	-64.677	-64.657	0.89405	1.9524
-4.7532	-64.677	-64.657	0.95657	2.0792
-4.7527	-64.677	-64.657	1.0228	2.2129
-4.7522	-64.677	-64.657	1.093	2.3537
-4.7517	-64.685	-64.659	1.1673	2.502
-4.7512	-64.723	-64.71	1.2459	2.6581
-4.7507	-64.723	-64.714	1.329	2.8222
-4.7502	-64.723	-64.714	1.4167	2.9947
-4.7497	-64.738	-64.731	1.5093	3.1758
-4.7492	-64.759	-64.747	1.607	3.3658
-4.7487	-64.78	-64.755	1.7099	3.5651
-4.7482	-64.799	-64.766	1.8184	3.7739
-4.7477	-64.818	-64.778	1.9325	3.9926
-4.7472	-64.823	-64.79	2.0525	4.2214
-4.7467	-64.829	-64.799	2.1787	4.4607
-4.7462	-64.829	-64.799	2.3112	4.7107
-4.7457	-64.829	-64.799	2.4503	4.9718
-4.7452	-64.831	-64.809	2.5962	5.2442
-4.7447	-64.834	-64.814	2.749	5.5283
-4.7442	-64.834	-64.814	2.9091	5.8243
-4.7437	-64.834	-64.814	3.0767	6.1324
-4.7432	-64.834	-64.814	3.2519	6.4531
-4.7427	-64.834	-64.814	3.435	6.7864
-4.7422	-64.84	-64.832	3.6262	7.1328
-4.7417	-64.864	-64.856	3.8257	7.4923
-4.7412	-64.891	-64.881	4.0338	7.8653
-4.7407	-64.902	-64.898	4.2505	8.252
-4.7402	-64.902	-64.898	4.4762	8.6526
-4.7397	-64.902	-64.898	4.7109	9.0672
-4.7392	-64.902	-64.898	4.955	9.4961
-4.7387	-64.902	-64.898	5.2085	9.9394
-4.7382	-64.902	-64.898	5.4717	10.397
-4.7377	-64.875	-64.871	5.7447	10.87
-4.7372	-64.818	-64.815	6.0276	11.357
-4.7367	-64.754	-64.771	6.3206	11.859
-4.7362	-64.747	-64.771	6.6238	12.376
-4.7357	-64.718	-64.715	6.9373	12.907
-4.7352	-64.544	-64.549	7.2613	13.454
-4.7347	-64.511	-64.515	7.5957	14.016
-4.7342	-64.461	-64.477	7.9407	14.592
-4.7337	-64.362	-64.336	8.2964	15.183
-4.7332	-64.332	-64.311	8.6626	15.789
-4.7327	-64.005	-63.977	9.0396	16.409
-4.7322	-63.742	-63.672	9.4272	17.044
-4.7317	-63.581	-63.494	9.8254	17.692
-4.7312	-63.346	-63.306	10.234	18.355
-4.7307	-63.299	-63.27	10.654	19.031
-4.7302	-63.222	-63.173	11.083	19.72
-4.7297	-63.13	-63.08	11.524	20.423
-4.7292	-63.036	-62.998	11.974	21.138
-4.7287	-62.909	-62.902	12.434	21.865
-4.7282	-62.776	-62.816	12.904	22.604
-4.7277	-62.705	-62.576	13.384	23.354
-4.7272	-62.601	-62.369	13.873	24.115
-4.7267	-62.555	-62.359	14.372	24.886
-4.7262	-62.449	-62.265	14.879	25.667
-4.7257	-62.31	-62.12	15.395	26.457
-4.7252	-62.169	-61.968	15.919	27.255
-4.7247	-62.025	-61.809	16.45	28.061
-4.7242	-61.863	-61.626	16.989	28.88
-4.7237	-61.707	-61.448	17.536	29.7
-4.7232	-61.567	-61.284	18.088	30.525
-4.7227	-61.461	-61.116	18.647	31.354
-4.7222	-61.359	-60.989	19.211	32.188
-4.7217	-61.147	-60.87	19.781	33.024
-4.7212	-60.681	-60.346	20.355	33.862
-4.7207	-60.681	-60.346	20.94	34.702
-4.7202	-60.681	-60.346	21.521	35.541
-4.7197	-60.598	-60.25	22.106	36.38
-4.7192	-60.531	-60.168	22.693	37.217
-4.7187	-60.529	-60.168	23.281	38.051
-4.7182	-60.477	-60.121	23.87	38.882
-4.7177	-60.386	-60.041	24.459	39.707
-4.7172	-60.277	-59.895	25.048	40.527
-4.7167	-60.206	-59.743	25.635	41.34
-4.7162	-60.123	-59.579	26.22	42.144
-4.7157	-60.021	-59.523	26.802	42.94
-4.7152	-59.968	-59.518	27.381	43.732
-4.7147	-59.968	-59.518	27.955	44.507
-4.7142	-59.968	-59.518	28.524	45.269
-4.7137	-59.968	-59.518	29.087	46.018
-4.7132	-59.968	-59.518	29.643	46.753
-4.7127	-59.936	-59.295	30.192	47.472
-4.7122	-59.592	-58.883	30.732	48.175
-4.7117	-58.948	-58.016	31.264	48.86
-4.7112	-58.815	-57.842	31.785	49.527
-4.7107	-58.578	-57.487	32.295	50.174
-4.7102	-57.85	-56.604	32.794	50.801
-4.7097	-57.5	-56.168	33.281	51.407
-4.7092	-57.397	-55.823	33.755	51.99
-4.7087	-57.243	-55.734	34.215	52.551
-4.7082	-57.082	-55.58	34.66	53.087
-4.7077	-56.942	-55.396	35.091	53.599
-4.7072	-56.817	-55.258	35.505	54.085
-4.7067	-56.747	-54.742	35.904	54.545
-4.7062	-56.482	-53.531	36.284	54.979
-4.7057	-56.447	-49.062	36.648	55.385
-4.7052	-56.362	-48.717	36.993	55.763
-4.7047	-56.275	-48.12	37.319	56.112
-4.7042	-56.204	-48.12	37.625	56.433
-4.7037	-55.819	-48.12	37.912	56.724
-4.7032	-55.741	-48.12	38.179	56.985
-4.7027	-55.627	-48.12	38.425	57.216
-4.7022	-55.47	-48.12	38.65	57.418
-4.7017	-55.358	-48.12	38.853	57.588
-4.7012	-52.414	-48.12	39.035	57.728
-4.7007	-52.387	-48.312	39.195	57.838
-4.7002	-52.207	-48.777	39.333	57.916
-4.6997	-51.936	-49.057	39.448	57.965
-4.6992	-51.761	-50.017	39.542	57.982
-4.6987	-51.42	-51.69	39.613	57.97
-4.6982	-50.96	-52.63	39.661	57.927
-4.6977	-50.109	-52.664	39.687	57.854
-4.6972	-49.074	-52.809	39.691	57.753
-4.6967	-49.069	-52.814	39.672	57.622
-4.6962	-49.115	-52.814	39.632	57.463
-4.6957	-49.8	-52.814	39.569	57.275
-4.6952	-50.31	-52.814	39.486	57.061
-4.6947	-50.736	-52.814	39.38	56.819
-4.6942	-51.145	-52.814	39.254	56.552
-4.6937	-51.467	-52.814	39.108	56.259
-4.6932	-51.737	-52.822	38.941	55.942
-4.6927	-51.883	-52.822	38.755	55.602
-4.6922	-52.072	-52.822	38.549	55.239
-4.6917	-52.072	-52.822	38.325	54.854
-4.6912	-52.072	-52.822	38.083	54.448
-4.6907	-52.409	-52.822	37.824	54.022
-4.6902	-53.557	-52.822	37.548	53.578
-4.6897	-54.449	-52.822	37.256	53.117
-4.6892	-54.936	-52.858	36.949	52.638
-4.6887	-55.468	-53.072	36.627	52.145
-4.6882	-55.777	-53.203	36.292	51.638
-4.6877	-56.22	-53.723	35.943	51.117
-4.6872	-56.273	-53.881	35.583	50.585
-4.6867	-56.344	-54.084	35.211	50.043
-4.6862	-56.579	-54.647	34.829	49.492
-4.6857	-56.818	-55.178	34.437	48.932
-4.6852	-56.944	-55.594	34.037	48.366
-4.6847	-56.967	-55.645	33.629	47.795
-4.6842	-57.02	-55.694	33.214	47.22
-4.6837	-57.278	-56.122	32.793	46.642
-4.6832	-57.834	-56.785	32.367	46.063
-4.6827	-58.317	-57.465	31.937	45.483
-4.6822	-58.508	-57.777	31.504	44.904
-4.6817	-58.747	-57.979	31.068	44.328
-4.6812	-59.015	-58.117	30.632	43.756
-4.6807	-59.071	-58.233	30.194	43.188
-4.6802	-59.107	-58.351	29.757	42.626
-4.6797	-59.163	-58.413	29.322	42.071
-4.6792	-59.228	-58.519	28.888	41.524
-4.6787	-59.295	-58.58	28.458	40.987
-4.6782	-59.333	-58.705	28.031	40.46
-4.6777	-59.367	-58.832	27.609	39.945
-4.6772	-59.417	-58.892	27.192	39.441
-4.6767	-59.573	-58.956	26.782	38.952
-4.6762	-59.573	-58.956	26.378	38.476
-4.6757	-59.512	-58.881	25.982	38.015
-4.6752	-59.397	-58.769	25.594	37.571
-4.6747	-59.36	-58.634	25.214	37.143
-4.6742	-59.336	-58.559	24.844	36.732
-4.6737	-59.378	-58.681	24.484	36.34
-4.6732	-59.45	-58.808	24.135	35.966
-4.6727	-59.564	-58.89	23.796	35.611
-4.6722	-59.638	-58.968	23.469	35.276
-4.6717	-59.638	-58.968	23.153	34.961
-4.6712	-59.638	-58.968	22.85	34.667
-4.6707	-59.638	-58.968	22.559	34.394
-4.6702	-59.638	-58.9	22.281	34.141
-4.6697	-59.53	-58.732	22.016	33.91
-4.6692	-59.416	-58.529	21.765	33.7
-4.6687	-59.302	-58.311	21.526	33.512
-4.6682	-59.101	-58.127	21.302	33.346
-4.6677	-58.884	-57.879	21.09	33.2
-4.6672	-58.692	-57.658	20.893	33.077
-4.6667	-58.558	-57.565	20.709	32.974
-4.6662	-58.554	-57.535	20.539	32.893
-4.6657	-58.554	-57.565	20.382	32.833
-4.6652	-58.527	-57.515	20.239	32.793
-4.6647	-58.484	-57.348	20.109	32.773
-4.6642	-58.425	-57.281	19.992	32.773
-4.6637	-58.338	-57.259	19.887	32.792
-4.6632	-58.332	-57.259	19.796	32.83
-4.6627	-58.318	-57.259	19.717	32.886
-4.6622	-58.318	-57.259	19.649	32.96
-4.6617	-58.318	-57.259	19.594	33.05
-4.6612	-58.318	-57.259	19.55	33.157
-4.6607	-58.342	-57.296	19.516	33.279
-4.6602	-58.38	-57.341	19.493	33.416
-4.6597	-58.432	-57.403	19.479	33.567
-4.6592	-58.483	-57.467	19.476	33.73
-4.6587	-58.547	-57.53	19.481	33.906
-4.6582	-58.662	-57.691	19.494	34.093
-4.6577	-58.754	-57.789	19.515	34.29
-4.6572	-59.13	-58.247	19.544	34.496
-4.6567	-59.782	-59.02	19.579	34.711
-4.6562	-60.381	-59.731	19.62	34.932
-4.6557	-60.923	-60.37	19.667	35.161
-4.6552	-61.079	-60.578	19.719	35.394
-4.6547	-61.079	-60.578	19.775	35.632
-4.6542	-61.079	-60.578	19.834	35.872
-4.6537	-61.079	-60.578	19.897	36.115
-4.6532	-61.079	-60.578	19.962	36.359
-4.6527	-61.079	-60.578	20.028	36.603
-4.6522	-61.079	-60.578	20.096	36.845
-4.6517	-61.079	-60.578	20.164	37.086
-4.6512	-61.079	-60.578	20.232	37.323
-4.6507	-61.079	-60.578	20.3	37.557
-4.6502	-60.47	-59.887	20.366	37.785
-4.6497	-60.283	-59.552	20.43	38.007
-4.6492	-59.96	-59.041	20.491	38.221
-4.6487	-59.189	-58.153	20.55	38.428
-4.6482	-58.437	-57.393	20.604	38.626
-4.6477	-57.532	-55.853	20.655	38.814
-4.6472	-56.753	-54.37	20.701	38.991
-4.6467	-55.729	-53.214	20.742	39.156
-4.6462	-55.264	-51.982	20.777	39.309
-4.6457	-55.22	-51.652	20.806	39.449
-4.6452	-55.192	-51.423	20.829	39.574
-4.6447	-55.124	-50.728	20.845	39.686
-4.6442	-55.009	-49.984	20.853	39.782
-4.6437	-54.152	-49.984	20.854	39.862
-4.6432	-53.652	-49.984	20.847	39.926
-4.6427	-53.595	-49.984	20.832	39.972
-4.6422	-53.489	-49.984	20.808	40.001
-4.6417	-53.42	-49.984	20.775	40.013
-4.6412	-52.789	-49.984	20.733	40.006
-4.6407	-51.797	-49.984	20.683	39.981
-4.6402	-51.797	-49.669	20.622	39.936
-4.6397	-51.797	-48.919	20.553	39.873
-4.6392	-51.797	-48.45	20.473	39.79
-4.6387	-51.797	-48.717	20.384	39.687
-4.6382	-51.797	-49.318	20.286	39.565
-4.6377	-51.797	-49.804	20.177	39.424
-4.6372	-51.797	-50.069	20.059	39.263
-4.6367	-51.797	-50.332	19.931	39.082
-4.6362	-51.797	-50.856	19.794	38.881
-4.6357	-52.459	-51.355	19.647	38.661
-4.6352	-53.509	-51.59	19.491	38.422
-4.6347	-54.542	-51.848	19.325	38.164
-4.6342	-55.404	-51.911	19.15	37.887
-4.6337	-55.924	-51.987	18.966	37.592
-4.6332	-56.598	-52.088	18.774	37.279
-4.6327	-56.728	-52.537	18.573	36.948
-4.6322	-56.875	-53.565	18.363	36.599
-4.6317	-57.01	-53.655	18.146	36.234
-4.6312	-57.104	-53.744	17.921	35.852
-4.6307	-57.22	-54.135	17.688	35.454
-4.6302	-57.287	-54.216	17.449	35.041
-4.6297	-57.404	-54.767	17.202	34.614
-4.6292	-57.671	-55.685	16.949	34.172
-4.6287	-58.32	-56.601	16.69	33.716
-4.6282	-58.398	-56.898	16.425	33.248
-4.6277	-58.443	-56.983	16.155	32.767
-4.6272	-58.443	-56.987	15.88	32.275
-4.6267	-58.443	-56.987	15.6	31.771
-4.6262	-58.443	-56.987	15.316	31.258
-4.6257	-58.443	-56.987	15.028	30.728
-4.6252	-58.443	-56.987	14.736	30.197
-4.6247	-58.443	-56.987	14.442	29.658
-4.6242	-58.443	-56.987	14.145	29.112
-4.6237	-58.443	-56.987	13.845	28.558
-4.6232	-58.34	-56.939	13.544	27.999
-4.6227	-58.01	-56.905	13.241	27.435
-4.6222	-57.856	-56.797	12.936	26.867
-4.6217	-57.813	-56.624	12.632	26.294
-4.6212	-57.794	-56.57	12.32	25.713
-4.6207	-57.738	-56.502	12.015	25.136
-4.6202	-57.694	-56.427	11.711	24.557
-4.6197	-57.645	-56.385	11.407	23.978
-4.6192	-57.572	-56.275	11.105	23.399
-4.6187	-57.488	-56.156	10.804	22.82
-4.6182	-57.409	-56.067	10.504	22.242
-4.6177	-57.373	-56	10.206	21.666
-4.6172	-57.353	-55.934	9.9111	21.093
-4.6167	-56.542	-54.901	9.6184	20.522
-4.6162	-56.417	-54.61	9.3285	19.955
-4.6157	-56.273	-54.441	9.0417	19.392
-4.6152	-56.223	-54.376	8.7584	18.834
-4.6147	-56.206	-54.347	8.4786	18.281
-4.6142	-56.177	-54.316	8.1965	17.734
-4.6137	-56.133	-54.278	7.9252	17.193
-4.6132	-56.058	-54.238	7.6581	16.659
-4.6127	-56.058	-54.204	7.3954	16.131
-4.6122	-56.058	-54.204	7.1373	15.611
-4.6117	-56.058	-54.204	6.8838	15.092
-4.6112	-56.058	-54.218	6.6352	14.589
-4.6107	-56.058	-54.266	6.3916	14.093
-4.6102	-56.058	-54.266	6.1531	13.607
-4.6097	-56.058	-54.266	5.9198	13.129
-4.6092	-56.058	-54.266	5.6917	12.661
-4.6087	-56.058	-54.292	5.4691	12.202
-4.6082	-56.071	-54.292	5.2518	11.752
-4.6077	-56.685	-54.631	5.0401	11.313
-4.6072	-57.4	-55.586	4.8338	10.883
-4.6067	-58.18	-56.553	4.6331	10.463
-4.6062	-58.91	-57.463	4.438	10.054
-4.6057	-59.031	-57.902	4.2484	9.6547
-4.6052	-59.139	-57.989	4.0644	9.2657
-4.6047	-59.262	-58.098	3.8859	8.8871
-4.6042	-59.361	-58.205	3.713	8.5189
-4.6037	-59.396	-58.288	3.5455	8.161
-4.6032	-59.434	-58.412	3.3834	7.8135
-4.6027	-59.555	-58.968	3.2268	7.4763
-4.6022	-59.642	-59.044	3.0755	7.1493
-4.6017	-59.691	-59.105	2.9294	6.8326
-4.6012	-59.738	-59.187	2.7885	6.5259
-4.6007	-59.78	-59.279	2.6528	6.2293
-4.6002	-59.86	-59.377	2.5221	5.9426
-4.5997	-59.955	-59.516	2.3963	5.6657
-4.5992	-60.066	-59.689	2.2754	5.3985
-4.5987	-60.097	-59.86	2.1592	5.1408
-4.5982	-60.147	-60.015	2.0477	4.8924
-4.5977	-60.216	-60.042	1.9407	4.6533
-4.5972	-60.297	-60.11	1.8382	4.4231
-4.5967	-60.363	-60.178	1.74	4.2019
-4.5962	-60.385	-60.21	1.646	3.9893
-4.5957	-60.385	-60.222	1.5561	3.7851
-4.5952	-60.385	-60.222	1.4702	3.5893
-4.5947	-60.458	-60.398	1.3882	3.4016
-4.5942	-60.813	-60.836	1.3099	3.2217
-4.5937	-61.041	-60.87	1.2353	3.0495
-4.5932	-61.041	-60.87	1.1642	2.8848
-4.5927	-61.041	-60.87	1.0965	2.7273
-4.5922	-61.041	-60.87	1.0321	2.5769
-4.5917	-61.123	-61.003	0.97086	2.4333
-4.5912	-61.195	-61.075	0.91269	2.2963
-4.5907	-61.252	-61.102	0.85747	2.1658
-4.5902	-61.337	-61.146	0.80509	2.0414
-4.5897	-61.369	-61.212	0.75544	1.923
-4.5892	-61.389	-61.285	0.70841	1.8104
-4.5887	-61.4	-61.313	0.66389	1.7033
-4.5882	-61.407	-61.315	0.62178	1.6017
-4.5877	-61.407	-61.315	0.58197	1.5051
-4.5872	-61.407	-61.315	0.54438	1.4136
-4.5867	-61.407	-61.315	0.50889	1.3268
-4.5862	-61.409	-61.315	0.47542	1.2446
-4.5857	-61.472	-61.329	0.44388	1.1668
-4.5852	-61.662	-61.401	0.41417	1.0931
-4.5847	-61.785	-61.733	0.3862	1.0236
-4.5842	-61.829	-61.931	0.3599	0.95781
-4.5837	-61.95	-62.053	0.33518	0.89576
-4.5832	-62.097	-62.212	0.31197	0.83721
-4.5827	-62.125	-62.244	0.29018	0.78202
-4.5822	-62.125	-62.244	0.26974	0.73003
-4.5817	-62.125	-62.244	0.25059	0.68109
-4.5812	-62.125	-62.244	0.23265	0.63504
-4.5807	-62.125	-62.244	0.21586	0.59174
-4.5802	-62.125	-62.244	0.20015	0.55107
-4.5797	-62.125	-62.244	0.18548	0.51287
-4.5792	-62.112	-62.244	0.17177	0.47704
-4.5787	-62.108	-62.257	0.15897	0.44345
-4.5782	-62.108	-62.257	0.14704	0.41196
-4.5777	-62.108	-62.257	0.13592	0.38249
-4.5772	-62.108	-62.257	0.12556	0.3549
-4.5767	-62.108	-62.257	0.11592	0.32911
-4.5762	-62.108	-62.257	0.10695	0.30501
-4.5757	-62.108	-62.257	0.09861	0.2825
-4.5752	-62.108	-62.257	0.090867	0.26149
-4.5747	-62.211	-62.333	0.083679	0.2419
-4.5742	-62.323	-62.445	0.077012	0.22364
-4.5737	-62.441	-62.568	0.070831	0.20663
-4.5732	-62.74	-62.86	0.065106	0.1908
-4.5727	-62.757	-62.88	0.059807	0.17608
-4.5722	-62.808	-62.938	0.054904	0.16239
-4.5717	-62.856	-62.992	0.050372	0.14968
-4.5712	-62.883	-63.05	0.046185	0.13788
-4.5707	-62.977	-63.12	0.042319	0.12693
-4.5702	-63.258	-63.419	0.038753	0.11678
-4.5697	-63.546	-63.722	0.035465	0.10738
-4.5692	-63.821	-64.009	0.032436	0.098673
-4.5687	-64.074	-64.232	0.029647	0.090617
-4.5682	-64.08	-64.232	0.027081	0.083169
-4.5677	-64.08	-64.232	0.024722	0.076287
-4.5672	-64.112	-64.233	0.022554	0.069931
-4.5667	-64.184	-64.323	0.020563	0.064066
-4.5662	-64.211	-64.335	0.018736	0.058657
-4.5657	-64.243	-64.393	0.017061	0.053672
-4.5652	-64.302	-64.482	0.015526	0.049081
-4.5647	-64.364	-64.529	0.01412	0.044856
-4.5642	-64.4	-64.555	0.012834	0.034377
-4.5637	-64.417	-64.614	0.011657	0.031434
-4.5632	-64.417	-64.638	0.010582	0.028724
-4.5627	-64.405	-64.608	0.0095998	0.026233
-4.5622	-64.393	-64.552	0.0087034	0.023942
-4.5617	-64.322	-64.526	0.0078857	0.021837
-4.5612	-64.256	-64.462	0.0071404	0.019906
-4.5607	-64.218	-64.393	0	0.018133
-4.5602	-64.218	-64.393	0	0.016508
-4.5597	-64.218	-64.393	0	0.01502
-4.5592	-64.218	-64.393	0	0.013657
-4.5587	-64.234	-64.42	0	0.01241
-4.5582	-64.256	-64.438	0	0.01127
-4.5577	-64.256	-64.438	0	0.010228
-4.5572	-64.256	-64.438	0	0.0092766
-4.5567	-64.256	-64.438	0	0.0084086
-4.5562	-64.254	-64.438	0	0.0076169
-4.5557	-64.184	-64.403	0	0.0068955
-4.5552	-64.116	-64.325	0	0
-4.5547	-64.061	-64.241	0	0
-4.5542	-63.981	-64.19	0	0
-4.5537	-63.906	-64.168	0	0
-4.5532	-63.854	-64.115	0	0
-4.5527	-63.643	-63.721	0	0
-4.5522	-63.245	-63.287	0	0
-4.5517	-63.245	-63.287	0	0
-4.5512	-63.245	-63.287	0	0
-4.5507	-63.245	-63.287	0	0
-4.5502	-63.245	-63.287	0	0
-4.5497	-63.245	-63.287	0	0
-4.5492	-63.245	-63.287	0	0
-4.5487	-63.245	-63.287	0	0
-4.5482	-63.245	-63.287	0	0
-4.5477	-63.245	-63.287	0	0
-4.5472	-63.273	-63.335	0	0
-4.5467	-63.463	-63.563	0	0
-4.5462	-63.655	-63.778	0	0
-4.5457	-63.836	-63.976	0	0
-4.5452	-64.004	-64.156	0	0
-4.5447	-64.158	-64.321	0	0
-4.5442	-64.3	-64.472	0	0
-4.5437	-64.43	-64.61	0	0
-4.5432	-64.55	-64.737	0	0
-4.5427	-64.659	-64.852	0	0
-4.5422	-64.737	-64.957	0	0
-4.5417	-64.759	-65.028	0	0
-4.5412	-64.792	-65.045	0	0
-4.5407	-64.829	-65.07	0	0
-4.5402	-64.866	-65.082	0	0
-4.5397	-64.881	-65.082	0	0
-4.5392	-64.881	-65.082	0	0
-4.5387	-64.881	-65.088	0	0
-4.5382	-64.881	-65.088	0	0
-4.5377	-64.881	-65.088	0	0
-4.5372	-64.884	-65.095	0	0
-4.5367	-64.907	-65.117	0	0
-4.5362	-64.921	-65.135	0	0
-4.5357	-64.921	-65.155	0	0
-4.5352	-64.921	-65.168	0	0
-4.5347	-64.93	-65.174	0	0
-4.5342	-64.93	-65.174	0	0
-4.5337	-64.93	-65.174	0	0
-4.5332	-64.927	-65.174	0	0
-4.5327	-64.913	-65.169	0	0
-4.5322	-64.904	-65.159	0	0
-4.5317	-64.88	-65.154	0	0
-4.5312	-64.863	-65.142	0	0
-4.5307	-64.857	-65.135	0	0
-4.5302	-64.857	-65.142	0	0
-4.5297	-64.866	-65.167	0	0
-4.5292	-64.881	-65.174	0	0
-4.5287	-64.905	-65.176	0	0
-4.5282	-64.929	-65.188	0	0
-4.5277	-64.945	-65.201	0	0
-4.5272	-64.964	-65.212	0	0
-4.5267	-64.983	-65.221	0	0
-4.5262	-65.005	-65.231	0	0
-4.5257	-65.039	-65.252	0	0
-4.5252	-65.07	-65.274	0	0
-4.5247	-65.089	-65.296	0	0
-4.5242	-65.103	-65.318	0	0
-4.5237	-65.124	-65.339	0	0
-4.5232	-65.149	-65.377	0	0
-4.5227	-65.155	-65.377	0	0
-4.5222	-65.155	-65.377	0	0
-4.5217	-65.155	-65.377	0	0
-4.5212	-65.155	-65.377	0	0
-4.5207	-65.155	-65.377	0	0
-4.5202	-65.155	-65.377	0	0
-4.5197	-65.155	-65.377	0	0
-4.5192	-65.143	-65.341	0	0
-4.5187	-65.136	-65.341	0	0
-4.5182	-65.136	-65.341	0	0
-4.5177	-65.058	-65.251	0	0
-4.5172	-64.96	-65.166	0	0
-4.5167	-64.834	-65	0	0
-4.5162	-64.404	-64.449	0	0
-4.5157	-63.77	-63.934	0	0
-4.5152	-62.936	-63.113	0	0
-4.5147	-62.695	-62.667	0	0
-4.5142	-62.695	-62.667	0	0
-4.5137	-62.695	-62.667	0	0
-4.5132	-62.695	-62.667	0	0
-4.5127	-62.695	-62.667	0	0
-4.5122	-62.695	-62.667	0	0
-4.5117	-62.671	-62.667	0	0
-4.5112	-62.555	-62.667	0	0
-4.5107	-62.504	-62.652	0	0
-4.5102	-62.473	-62.618	0	0
-4.5097	-62.5	-62.652	0	0
-4.5092	-62.524	-62.673	0	0
-4.5087	-62.612	-62.711	0	0
-4.5082	-62.695	-62.746	0	0
-4.5077	-62.725	-62.812	0	0
-4.5072	-62.771	-62.898	0	0
-4.5067	-62.818	-62.996	0	0
-4.5062	-62.86	-63.097	0	0
-4.5057	-62.914	-63.145	0	0
-4.5052	-62.966	-63.177	0	0
-4.5047	-63.018	-63.195	0	0
-4.5042	-63.036	-63.212	0	0
-4.5037	-63.064	-63.234	0	0
-4.5032	-63.079	-63.284	0	0
-4.5027	-63.079	-63.284	0	0
-4.5022	-63.084	-63.284	0	0
-4.5017	-63.094	-63.318	0	0
-4.5012	-63.242	-63.458	0	0
-4.5007	-63.303	-63.531	0	0
-4.5002	-63.383	-63.587	0	0
-4.4997	-63.446	-63.66	0	0
-4.4992	-63.591	-63.759	0	0
-4.4987	-63.591	-63.759	0	0
-4.4982	-63.625	-63.77	0	0
-4.4977	-63.687	-63.793	0	0
-4.4972	-63.719	-63.843	0	0
-4.4967	-63.747	-63.867	0	0
-4.4962	-63.782	-63.905	0	0
-4.4957	-63.827	-63.944	0	0
-4.4952	-63.876	-64.022	0	0
-4.4947	-63.898	-64.055	0	0
-4.4942	-63.913	-64.061	0	0
-4.4937	-63.913	-64.061	0	0
-4.4932	-63.913	-64.061	0	0
-4.4927	-63.913	-64.06	0	0
-4.4922	-63.885	-64.052	0	0
-4.4917	-63.852	-63.998	0	0
-4.4912	-63.798	-63.955	0	0
-4.4907	-63.776	-63.918	0	0
-4.4902	-63.752	-63.876	0	0
-4.4897	-63.744	-63.867	0	0
-4.4892	-63.747	-63.907	0	0
-4.4887	-63.758	-63.94	0	0
-4.4882	-63.791	-63.976	0	0
-4.4877	-63.8	-64.01	0	0
-4.4872	-63.8	-64.011	0	0
-4.4867	-63.8	-64.011	0	0
-4.4862	-63.8	-64.011	0	0
-4.4857	-63.8	-64.011	0	0
-4.4852	-63.8	-64.011	0	0
-4.4847	-63.8	-64.011	0	0
-4.4842	-63.851	-64.056	0	0
-4.4837	-63.956	-64.221	0	0
-4.4832	-63.983	-64.252	0	0
-4.4827	-64.067	-64.336	0	0
-4.4822	-64.211	-64.454	0	0
-4.4817	-64.262	-64.57	0	0
-4.4812	-64.321	-64.624	0	0
-4.4807	-64.38	-64.65	0	0
-4.4802	-64.438	-64.661	0	0
-4.4797	-64.453	-64.679	0	0
-4.4792	-64.477	-64.699	0	0
-4.4787	-64.504	-64.721	0	0
-4.4782	-64.528	-64.743	0	0
-4.4777	-64.567	-64.776	0	0
-4.4772	-64.603	-64.806	0	0
-4.4767	-64.636	-64.837	0	0
-4.4762	-64.721	-64.853	0	0
-4.4757	-64.773	-64.886	0	0
-4.4752	-64.788	-64.924	0	0
-4.4747	-64.802	-64.94	0	0
-4.4742	-64.802	-64.94	0	0
-4.4737	-64.802	-64.94	0	0
-4.4732	-64.802	-64.942	0	0
-4.4727	-64.815	-64.965	0	0
-4.4722	-64.832	-64.988	0	0
-4.4717	-64.849	-65.009	0	0
-4.4712	-64.88	-65.034	0	0
-4.4707	-64.91	-65.065	0	0
-4.4702	-64.939	-65.095	0	0
-4.4697	-64.939	-65.109	0	0
-4.4692	-64.939	-65.109	0	0
-4.4687	-64.939	-65.109	0	0
-4.4682	-64.952	-65.125	0	0
-4.4677	-64.962	-65.139	0	0
-4.4672	-64.962	-65.139	0	0
-4.4667	-64.962	-65.139	0	0
-4.4662	-64.962	-65.139	0	0
-4.4657	-64.948	-65.126	0	0
-4.4652	-64.919	-65.101	0	0
-4.4647	-64.903	-65.095	0	0
-4.4642	-64.903	-65.095	0	0
-4.4637	-64.903	-65.095	0	0
-4.4632	-64.903	-65.095	0	0
-4.4627	-64.903	-65.095	0	0
-4.4622	-64.884	-65.095	0	0
-4.4617	-64.821	-65.057	0	0
-4.4612	-64.767	-65.026	0	0
-4.4607	-64.74	-64.952	0	0
-4.4602	-64.608	-64.715	0	0
-4.4597	-64.45	-64.601	0	0
-4.4592	-64.45	-64.601	0	0
-4.4587	-64.449	-64.601	0	0
-4.4582	-64.449	-64.601	0	0
-4.4577	-64.449	-64.601	0	0
-4.4572	-64.449	-64.601	0	0
-4.4567	-64.449	-64.601	0	0
-4.4562	-64.449	-64.601	0	0
-4.4557	-64.449	-64.601	0	0
-4.4552	-64.449	-64.601	0	0
-4.4547	-64.46	-64.657	0	0
-4.4542	-64.493	-64.68	0	0
-4.4537	-64.524	-64.7	0	0
-4.4532	-64.54	-64.715	0	0
-4.4527	-64.564	-64.73	0	0
-4.4522	-64.578	-64.732	0	0
-4.4517	-64.578	-64.732	0	0
-4.4512	-64.578	-64.732	0	0
-4.4507	-64.578	-64.732	0	0
-4.4502	-64.578	-64.732	0	0
-4.4497	-64.578	-64.732	0	0
-4.4492	-64.578	-64.732	0	0
-4.4487	-64.579	-64.733	0	0
-4.4482	-64.602	-64.742	0	0
-4.4477	-64.607	-64.742	0	0
-4.4472	-64.607	-64.742	0	0
-4.4467	-64.589	-64.733	0	0
-4.4462	-64.563	-64.723	0	0
-4.4457	-64.55	-64.71	0	0
-4.4452	-64.539	-64.698	0	0
-4.4447	-64.53	-64.694	0	0
-4.4442	-64.525	-64.689	0	0
-4.4437	-64.524	-64.689	0	0
-4.4432	-64.524	-64.689	0	0
-4.4427	-64.524	-64.689	0	0
-4.4422	-64.528	-64.697	0	0
-4.4417	-64.529	-64.698	0	0
-4.4412	-64.539	-64.702	0	0
-4.4407	-64.551	-64.71	0	0
-4.4402	-64.566	-64.71	0	0
-4.4397	-64.575	-64.714	0	0
-4.4392	-64.59	-64.731	0	0
-4.4387	-64.608	-64.745	0	0
-4.4382	-64.615	-64.749	0	0
-4.4377	-64.615	-64.749	0	0
-4.4372	-64.615	-64.749	0	0
-4.4367	-64.634	-64.764	0	0
-4.4362	-64.661	-64.784	0	0
-4.4357	-64.685	-64.812	0	0
-4.4352	-64.719	-64.846	0	0
-4.4347	-64.752	-64.86	0	0
-4.4342	-64.764	-64.86	0	0
-4.4337	-64.773	-64.86	0	0
-4.4332	-64.774	-64.867	0	0
-4.4327	-64.772	-64.869	0	0
-4.4322	-64.772	-64.882	0	0
-4.4317	-64.774	-64.889	0	0
-4.4312	-64.776	-64.898	0	0
-4.4307	-64.776	-64.898	0	0
-4.4302	-64.776	-64.898	0	0
-4.4297	-64.776	-64.898	0	0
-4.4292	-64.776	-64.898	0	0
-4.4287	-64.773	-64.893	0	0
-4.4282	-64.763	-64.891	0	0
-4.4277	-64.761	-64.891	0	0
-4.4272	-64.742	-64.891	0	0
-4.4267	-64.715	-64.888	0	0
-4.4262	-64.703	-64.883	0	0
-4.4257	-64.691	-64.871	0	0
-4.4252	-64.674	-64.846	0	0
-4.4247	-64.647	-64.814	0	0
-4.4242	-64.645	-64.836	0	0
-4.4237	-64.645	-64.856	0	0
-4.4232	-64.645	-64.846	0	0
-4.4227	-64.665	-64.823	0	0
-4.4222	-64.68	-64.82	0	0
-4.4217	-64.68	-64.82	0	0
-4.4212	-64.68	-64.82	0	0
-4.4207	-64.68	-64.82	0	0
-4.4202	-64.694	-64.825	0	0
-4.4197	-64.703	-64.846	0	0
-4.4192	-64.718	-64.866	0	0
-4.4187	-64.734	-64.886	0	0
-4.4182	-64.748	-64.895	0	0
-4.4177	-64.752	-64.895	0	0
-4.4172	-64.775	-64.92	0	0
-4.4167	-64.815	-64.956	0	0
-4.4162	-64.874	-65.019	0	0
-4.4157	-64.939	-65.086	0	0
-4.4152	-65.008	-65.132	0	0
-4.4147	-65.05	-65.149	0	0
-4.4142	-65.065	-65.177	0	0
-4.4137	-65.088	-65.207	0	0
-4.4132	-65.112	-65.238	0	0
-4.4127	-65.125	-65.26	0	0
-4.4122	-65.136	-65.26	0	0
-4.4117	-65.142	-65.273	0	0
-4.4112	-65.145	-65.273	0	0
-4.4107	-65.145	-65.273	0	0
-4.4102	-65.145	-65.273	0	0
-4.4097	-65.145	-65.273	0	0
-4.4092	-65.145	-65.27	0	0
-4.4087	-65.139	-65.25	0	0
-4.4082	-65.128	-65.233	0	0
-4.4077	-65.121	-65.209	0	0
-4.4072	-65.101	-65.182	0	0
-4.4067	-65.089	-65.159	0	0
-4.4062	-65.078	-65.14	0	0
-4.4057	-65.072	-65.132	0	0
-4.4052	-65.072	-65.137	0	0
-4.4047	-65.076	-65.144	0	0
-4.4042	-65.072	-65.129	0	0
-4.4037	-65.053	-65.116	0	0
-4.4032	-65.032	-65.105	0	0
-4.4027	-65.02	-65.094	0	0
-4.4022	-65.007	-65.074	0	0
-4.4017	-64.996	-65.052	0	0
-4.4012	-64.991	-65.031	0	0
-4.4007	-64.961	-65.012	0	0
-4.4002	-64.93	-65.001	0	0
-4.3997	-64.906	-64.967	0	0
-4.3992	-64.863	-64.946	0	0
-4.3987	-64.804	-64.897	0	0
-4.3982	-64.792	-64.883	0	0
-4.3977	-64.792	-64.883	0	0
-4.3972	-64.787	-64.876	0	0
-4.3967	-64.77	-64.852	0	0
-4.3962	-64.77	-64.845	0	0
-4.3957	-64.77	-64.845	0	0
-4.3952	-64.77	-64.845	0	0
-4.3947	-64.77	-64.845	0	0
-4.3942	-64.77	-64.845	0	0
-4.3937	-64.777	-64.851	0	0
-4.3932	-64.792	-64.87	0	0
-4.3927	-64.802	-64.887	0	0
-4.3922	-64.802	-64.887	0	0
-4.3917	-64.795	-64.88	0	0
-4.3912	-64.804	-64.892	0	0
-4.3907	-64.821	-64.913	0	0
-4.3902	-64.837	-64.931	0	0
-4.3897	-64.853	-64.949	0	0
-4.3892	-64.865	-64.959	0	0
-4.3887	-64.879	-64.974	0	0
-4.3882	-64.898	-64.995	0	0
-4.3877	-64.924	-65.024	0	0
-4.3872	-64.944	-65.052	0	0
-4.3867	-64.957	-65.073	0	0
-4.3862	-64.972	-65.086	0	0
-4.3857	-64.989	-65.102	0	0
-4.3852	-65.006	-65.116	0	0
-4.3847	-65.021	-65.116	0	0
-4.3842	-65.023	-65.116	0	0
-4.3837	-65.019	-65.094	0	0
-4.3832	-65.019	-65.094	0	0
-4.3827	-65.019	-65.094	0	0
-4.3822	-65.019	-65.094	0	0
-4.3817	-65.019	-65.094	0	0
-4.3812	-65.019	-65.094	0	0
-4.3807	-65.019	-65.092	0	0
-4.3802	-64.977	-65.075	0	0
-4.3797	-64.946	-65.051	0	0
-4.3792	-64.725	-64.92	0	0
-4.3787	-64.645	-64.726	0	0
-4.3782	-64.629	-64.711	0	0
-4.3777	-64.629	-64.711	0	0
-4.3772	-64.629	-64.711	0	0
-4.3767	-64.629	-64.698	0	0
-4.3762	-64.629	-64.689	0	0
-4.3757	-64.62	-64.675	0	0
-4.3752	-64.606	-64.664	0	0
-4.3747	-64.606	-64.664	0	0
-4.3742	-64.606	-64.664	0	0
-4.3737	-64.609	-64.651	0	0
-4.3732	-64.622	-64.661	0	0
-4.3727	-64.624	-64.665	0	0
-4.3722	-64.613	-64.65	0	0
-4.3717	-64.605	-64.644	0	0
-4.3712	-64.605	-64.644	0	0
-4.3707	-64.605	-64.644	0	0
-4.3702	-64.605	-64.644	0	0
-4.3697	-64.605	-64.644	0	0
-4.3692	-64.605	-64.644	0	0
-4.3687	-64.605	-64.635	0	0
-4.3682	-64.598	-64.634	0	0
-4.3677	-64.598	-64.634	0	0
-4.3672	-64.588	-64.634	0	0
-4.3667	-64.579	-64.634	0	0
-4.3662	-64.579	-64.634	0	0
-4.3657	-64.579	-64.644	0	0
-4.3652	-64.579	-64.648	0	0
-4.3647	-64.579	-64.648	0	0
-4.3642	-64.579	-64.648	0	0
-4.3637	-64.579	-64.66	0	0
-4.3632	-64.579	-64.668	0	0
-4.3627	-64.596	-64.68	0	0
-4.3622	-64.626	-64.711	0	0
-4.3617	-64.657	-64.741	0	0
-4.3612	-64.711	-64.798	0	0
-4.3607	-64.796	-64.885	0	0
-4.3602	-64.879	-64.969	0	0
-4.3597	-64.925	-65.014	0	0
-4.3592	-64.946	-65.038	0	0
-4.3587	-64.966	-65.055	0	0
-4.3582	-64.966	-65.055	0	0
-4.3577	-64.966	-65.055	0	0
-4.3572	-64.966	-65.055	0	0
-4.3567	-64.966	-65.055	0	0
-4.3562	-64.966	-65.055	0	0
-4.3557	-64.966	-65.055	0	0
-4.3552	-64.966	-65.055	0	0
-4.3547	-64.966	-65.055	0	0
-4.3542	-64.935	-65.02	0	0
-4.3537	-64.882	-64.909	0	0
-4.3532	-64.842	-64.909	0	0
-4.3527	-64.842	-64.909	0	0
-4.3522	-64.842	-64.909	0	0
-4.3517	-64.842	-64.909	0	0
-4.3512	-64.842	-64.909	0	0
-4.3507	-64.842	-64.909	0	0
-4.3502	-64.842	-64.909	0	0
-4.3497	-64.842	-64.909	0	0
-4.3492	-64.842	-64.909	0	0
-4.3487	-64.842	-64.921	0	0
-4.3482	-64.869	-64.998	0	0
-4.3477	-64.885	-65.008	0	0
-4.3472	-64.89	-65.026	0	0
-4.3467	-64.89	-65.027	0	0
-4.3462	-64.89	-65.029	0	0
-4.3457	-64.906	-65.04	0	0
-4.3452	-64.92	-65.053	0	0
-4.3447	-64.936	-65.065	0	0
-4.3442	-64.951	-65.078	0	0
-4.3437	-64.965	-65.091	0	0
-4.3432	-64.976	-65.099	0	0
-4.3427	-64.975	-65.099	0	0
-4.3422	-64.958	-65.091	0	0
-4.3417	-64.941	-65.077	0	0
-4.3412	-64.924	-65.062	0	0
-4.3407	-64.906	-65.047	0	0
-4.3402	-64.906	-65.036	0	0
-4.3397	-64.906	-65.036	0	0
-4.3392	-64.917	-65.042	0	0
-4.3387	-64.93	-65.053	0	0
-4.3382	-64.942	-65.065	0	0
-4.3377	-64.942	-65.067	0	0
-4.3372	-64.96	-65.074	0	0
-4.3367	-64.979	-65.092	0	0
-4.3362	-64.996	-65.109	0	0
-4.3357	-65.013	-65.125	0	0
-4.3352	-65.029	-65.141	0	0
-4.3347	-65.041	-65.148	0	0
-4.3342	-65.03	-65.124	0	0
-4.3337	-65.02	-65.116	0	0
-4.3332	-65.02	-65.115	0	0
-4.3327	-65.02	-65.115	0	0
-4.3322	-65.02	-65.115	0	0
-4.3317	-65.026	-65.122	0	0
-4.3312	-65.038	-65.135	0	0
-4.3307	-65.048	-65.146	0	0
-4.3302	-65.064	-65.159	0	0
-4.3297	-65.082	-65.177	0	0
-4.3292	-65.099	-65.195	0	0
-4.3287	-65.115	-65.212	0	0
-4.3282	-65.131	-65.227	0	0
-4.3277	-65.147	-65.242	0	0
-4.3272	-65.156	-65.247	0	0
-4.3267	-65.151	-65.231	0	0
-4.3262	-65.114	-65.191	0	0
-4.3257	-65.075	-65.15	0	0
-4.3252	-65.045	-65.135	0	0
-4.3247	-65.034	-65.125	0	0
-4.3242	-65.034	-65.125	0	0
-4.3237	-65.024	-65.108	0	0
-4.3232	-65	-65.074	0	0
-4.3227	-65	-65.074	0	0
-4.3222	-65	-65.026	0	0
-4.3217	-64.936	-65.003	0	0
-4.3212	-64.867	-64.991	0	0
-4.3207	-64.867	-64.983	0	0
-4.3202	-64.867	-64.983	0	0
-4.3197	-64.867	-64.983	0	0
-4.3192	-64.867	-64.983	0	0
-4.3187	-64.867	-64.983	0	0
-4.3182	-64.858	-64.957	0	0
-4.3177	-64.846	-64.93	0	0
-4.3172	-64.846	-64.929	0	0
-4.3167	-64.846	-64.929	0	0
-4.3162	-64.852	-64.93	0	0
-4.3157	-64.865	-64.952	0	0
-4.3152	-64.878	-64.973	0	0
-4.3147	-64.902	-64.995	0	0
-4.3142	-64.927	-65.018	0	0
-4.3137	-64.953	-65.049	0	0
-4.3132	-64.978	-65.079	0	0
-4.3127	-65.002	-65.106	0	0
-4.3122	-65.025	-65.13	0	0
-4.3117	-65.046	-65.152	0	0
-4.3112	-65.067	-65.173	0	0
-4.3107	-65.086	-65.191	0	0
-4.3102	-65.103	-65.209	0	0
-4.3097	-65.12	-65.225	0	0
-4.3092	-65.122	-65.224	0	0
-4.3087	-65.111	-65.215	0	0
-4.3082	-65.111	-65.215	0	0
-4.3077	-65.111	-65.215	0	0
-4.3072	-65.111	-65.215	0	0
-4.3067	-65.111	-65.215	0	0
-4.3062	-65.111	-65.215	0	0
-4.3057	-65.111	-65.215	0	0
-4.3052	-65.111	-65.215	0	0
-4.3047	-65.111	-65.215	0	0
-4.3042	-64.983	-65.007	0	0
-4.3037	-64.733	-64.85	0	0
-4.3032	-64.608	-64.781	0	0
-4.3027	-64.509	-64.692	0	0
-4.3022	-64.492	-64.644	0	0
-4.3017	-64.46	-64.603	0	0
-4.3012	-64.441	-64.597	0	0
-4.3007	-64.43	-64.566	0	0
-4.3002	-64.419	-64.53	0	0
-4.2997	-64.395	-64.51	0	0
-4.2992	-64.372	-64.489	0	0
-4.2987	-64.35	-64.47	0	0
-4.2982	-64.332	-64.461	0	0
-4.2977	-64.325	-64.453	0	0
-4.2972	-64.325	-64.453	0	0
-4.2967	-64.325	-64.453	0	0
-4.2962	-64.325	-64.453	0	0
-4.2957	-64.336	-64.458	0	0
-4.2952	-64.353	-64.465	0	0
-4.2947	-64.374	-64.481	0	0
-4.2942	-64.395	-64.501	0	0
-4.2937	-64.4	-64.502	0	0
-4.2932	-64.4	-64.502	0	0
-4.2927	-64.422	-64.513	0	0
-4.2922	-64.461	-64.546	0	0
-4.2917	-64.539	-64.623	0	0
-4.2912	-64.609	-64.643	0	0
-4.2907	-64.624	-64.669	0	0
-4.2902	-64.626	-64.697	0	0
-4.2897	-64.64	-64.726	0	0
-4.2892	-64.659	-64.756	0	0
-4.2887	-64.665	-64.782	0	0
-4.2882	-64.665	-64.782	0	0
-4.2877	-64.665	-64.782	0	0
-4.2872	-64.665	-64.782	0	0
-4.2867	-64.665	-64.782	0	0
-4.2862	-64.665	-64.782	0	0
-4.2857	-64.661	-64.782	0	0
-4.2852	-64.657	-64.794	0	0
-4.2847	-64.68	-64.834	0	0
-4.2842	-64.711	-64.873	0	0
-4.2837	-64.743	-64.9	0	0
-4.2832	-64.755	-64.906	0	0
-4.2827	-64.755	-64.91	0	0
-4.2822	-64.755	-64.91	0	0
-4.2817	-64.755	-64.91	0	0
-4.2812	-64.755	-64.919	0	0
-4.2807	-64.761	-64.919	0	0
-4.2802	-64.806	-64.923	0	0
-4.2797	-64.833	-64.942	0	0
-4.2792	-64.833	-64.942	0	0
-4.2787	-64.833	-64.942	0	0
-4.2782	-64.833	-64.942	0	0
-4.2777	-64.833	-64.942	0	0
-4.2772	-64.833	-64.942	0	0
-4.2767	-64.833	-64.942	0	0
-4.2762	-64.833	-64.942	0	0
-4.2757	-64.833	-64.942	0	0
-4.2752	-64.833	-64.942	0	0
-4.2747	-64.837	-64.94	0	0
-4.2742	-64.82	-64.931	0	0
-4.2737	-64.802	-64.916	0	0
-4.2732	-64.8	-64.909	0	0
-4.2727	-64.8	-64.909	0	0
-4.2722	-64.8	-64.909	0	0
-4.2717	-64.8	-64.909	0	0
-4.2712	-64.8	-64.909	0	0
-4.2707	-64.8	-64.909	0	0
-4.2702	-64.8	-64.909	0	0
-4.2697	-64.801	-64.909	0	0
-4.2692	-64.816	-64.92	0	0
-4.2687	-64.846	-64.934	0	0
-4.2682	-64.875	-64.961	0	0
-4.2677	-64.894	-64.973	0	0
-4.2672	-64.908	-64.988	0	0
-4.2667	-64.927	-65.008	0	0
-4.2662	-64.937	-65.028	0	0
-4.2657	-64.947	-65.049	0	0
-4.2652	-64.96	-65.054	0	0
-4.2647	-64.972	-65.064	0	0
-4.2642	-64.986	-65.074	0	0
-4.2637	-65	-65.086	0	0
-4.2632	-65.014	-65.098	0	0
-4.2627	-65.028	-65.11	0	0
-4.2622	-65.045	-65.123	0	0
-4.2617	-65.067	-65.143	0	0
-4.2612	-65.079	-65.156	0	0
-4.2607	-65.084	-65.182	0	0
-4.2602	-65.099	-65.188	0	0
-4.2597	-65.117	-65.201	0	0
-4.2592	-65.136	-65.216	0	0
-4.2587	-65.156	-65.232	0	0
-4.2582	-65.173	-65.248	0	0
-4.2577	-65.19	-65.264	0	0
-4.2572	-65.206	-65.278	0	0
-4.2567	-65.22	-65.291	0	0
-4.2562	-65.237	-65.307	0	0
-4.2557	-65.256	-65.323	0	0
-4.2552	-65.261	-65.325	0	0
-4.2547	-65.261	-65.325	0	0
-4.2542	-65.261	-65.325	0	0
-4.2537	-65.261	-65.325	0	0
-4.2532	-65.261	-65.325	0	0
-4.2527	-65.261	-65.325	0	0
-4.2522	-65.261	-65.325	0	0
-4.2517	-65.261	-65.325	0	0
-4.2512	-65.261	-65.325	0	0
-4.2507	-65.261	-65.325	0	0
-4.2502	-65.197	-65.288	0	0
-4.2497	-65.172	-65.256	0	0
-4.2492	-65.148	-65.236	0	0
-4.2487	-65.133	-65.224	0	0
-4.2482	-65.09	-65.113	0	0
-4.2477	-65.058	-65.09	0	0
-4.2472	-65.024	-65.068	0	0
-4.2467	-64.993	-65.046	0	0
-4.2462	-64.958	-65.025	0	0
-4.2457	-64.921	-65	0	0
-4.2452	-64.881	-64.958	0	0
-4.2447	-64.838	-64.914	0	0
-4.2442	-64.795	-64.869	0	0
-4.2437	-64.755	-64.836	0	0
-4.2432	-64.731	-64.792	0	0
-4.2427	-64.701	-64.694	0	0
-4.2422	-64.687	-64.663	0	0
-4.2417	-64.592	-64.629	0	0
-4.2412	-64.592	-64.629	0	0
-4.2407	-64.592	-64.629	0	0
-4.2402	-64.592	-64.629	0	0
-4.2397	-64.592	-64.629	0	0
-4.2392	-64.592	-64.629	0	0
-4.2387	-64.592	-64.629	0	0
-4.2382	-64.592	-64.629	0	0
-4.2377	-64.592	-64.629	0	0
-4.2372	-64.577	-64.626	0	0
-4.2367	-64.549	-64.614	0	0
-4.2362	-64.549	-64.614	0	0
-4.2357	-64.554	-64.624	0	0
-4.2352	-64.554	-64.624	0	0
-4.2347	-64.554	-64.624	0	0
-4.2342	-64.554	-64.624	0	0
-4.2337	-64.554	-64.624	0	0
-4.2332	-64.555	-64.628	0	0
-4.2327	-64.583	-64.647	0	0
-4.2322	-64.602	-64.681	0	0
-4.2317	-64.614	-64.689	0	0
-4.2312	-64.618	-64.694	0	0
-4.2307	-64.618	-64.694	0	0
-4.2302	-64.618	-64.686	0	0
-4.2297	-64.618	-64.684	0	0
-4.2292	-64.618	-64.684	0	0
-4.2287	-64.618	-64.684	0	0
-4.2282	-64.618	-64.684	0	0
-4.2277	-64.639	-64.686	0	0
-4.2272	-64.657	-64.701	0	0
-4.2267	-64.681	-64.732	0	0
-4.2262	-64.681	-64.74	0	0
-4.2257	-64.681	-64.74	0	0
-4.2252	-64.681	-64.74	0	0
-4.2247	-64.681	-64.74	0	0
-4.2242	-64.681	-64.74	0	0
-4.2237	-64.681	-64.74	0	0
-4.2232	-64.681	-64.74	0	0
-4.2227	-64.681	-64.74	0	0
-4.2222	-64.65	-64.701	0	0
-4.2217	-64.613	-64.674	0	0
-4.2212	-64.613	-64.671	0	0
-4.2207	-64.565	-64.624	0	0
-4.2202	-64.539	-64.579	0	0
-4.2197	-64.529	-64.554	0	0
-4.2192	-64.506	-64.529	0	0
-4.2187	-64.48	-64.512	0	0
-4.2182	-64.454	-64.501	0	0
-4.2177	-64.444	-64.489	0	0
-4.2172	-64.428	-64.474	0	0
-4.2167	-64.423	-64.457	0	0
-4.2162	-64.428	-64.448	0	0
-4.2157	-64.435	-64.448	0	0
-4.2152	-64.435	-64.448	0	0
-4.2147	-64.435	-64.448	0	0
-4.2142	-64.427	-64.435	0	0
-4.2137	-64.419	-64.421	0	0
-4.2132	-64.41	-64.407	0	0
-4.2127	-64.402	-64.398	0	0
-4.2122	-64.393	-64.396	0	0
-4.2117	-64.393	-64.396	0	0
-4.2112	-64.393	-64.396	0	0
-4.2107	-64.393	-64.396	0	0
-4.2102	-64.393	-64.396	0	0
-4.2097	-64.399	-64.399	0	0
-4.2092	-64.403	-64.403	0	0
-4.2087	-64.421	-64.419	0	0
-4.2082	-64.436	-64.435	0	0
-4.2077	-64.439	-64.435	0	0
-4.2072	-64.455	-64.448	0	0
-4.2067	-64.477	-64.521	0	0
-4.2062	-64.55	-64.595	0	0
-4.2057	-64.616	-64.663	0	0
-4.2052	-64.678	-64.726	0	0
-4.2047	-64.734	-64.783	0	0
-4.2042	-64.787	-64.836	0	0
-4.2037	-64.842	-64.893	0	0
-4.2032	-64.88	-64.943	0	0
-4.2027	-64.88	-64.943	0	0
-4.2022	-64.88	-64.943	0	0
-4.2017	-64.88	-64.943	0	0
-4.2012	-64.88	-64.943	0	0
-4.2007	-64.89	-64.964	0	0
-4.2002	-64.89	-64.964	0	0
-4.1997	-64.89	-64.964	0	0
-4.1992	-64.89	-64.964	0	0
-4.1987	-64.89	-64.964	0	0
-4.1982	-64.884	-64.964	0	0
-4.1977	-64.857	-64.943	0	0
-4.1972	-64.837	-64.92	0	0
-4.1967	-64.819	-64.906	0	0
-4.1962	-64.799	-64.894	0	0
-4.1957	-64.782	-64.886	0	0
-4.1952	-64.767	-64.856	0	0
-4.1947	-64.757	-64.811	0	0
-4.1942	-64.732	-64.779	0	0
-4.1937	-64.659	-64.592	0	0
-4.1932	-64.546	-64.592	0	0
-4.1927	-64.546	-64.592	0	0
-4.1922	-64.546	-64.592	0	0
-4.1917	-64.546	-64.592	0	0
-4.1912	-64.546	-64.592	0	0
-4.1907	-64.546	-64.592	0	0
-4.1902	-64.546	-64.592	0	0
-4.1897	-64.546	-64.592	0	0
-4.1892	-64.546	-64.592	0	0
-4.1887	-64.546	-64.593	0	0
-4.1882	-64.588	-64.66	0	0
-4.1877	-64.651	-64.722	0	0
-4.1872	-64.701	-64.762	0	0
-4.1867	-64.701	-64.762	0	0
-4.1862	-64.701	-64.762	0	0
-4.1857	-64.701	-64.762	0	0
-4.1852	-64.701	-64.762	0	0
-4.1847	-64.701	-64.762	0	0
-4.1842	-64.701	-64.762	0	0
-4.1837	-64.701	-64.762	0	0
-4.1832	-64.701	-64.762	0	0
[truncated: 8,869 more rows]

## Sheet: Fig7B
-5.1827	-32.221	-32.132	0	0
-5.1822	-64.455	-64.292	0	0
-5.1817	-64.483	-64.356	0	0
-5.1812	-64.483	-64.361	0	0
-5.1807	-64.483	-64.361	0	0
-5.1802	-64.483	-64.361	0	0
-5.1797	-64.483	-64.361	0	0
-5.1792	-64.483	-64.361	0	0
-5.1787	-64.483	-64.361	0	0
-5.1782	-64.474	-64.345	0	0
-5.1777	-64.449	-64.292	0	0
-5.1772	-64.317	-64.265	0	0
-5.1767	-64.095	-64.124	0	0
-5.1762	-64.067	-64.105	0	0
-5.1757	-64.067	-64.105	0	0
-5.1752	-64.067	-64.105	0	0
-5.1747	-64.067	-64.105	0	0
-5.1742	-64.067	-64.105	0	0
-5.1737	-64.067	-64.105	0	0
-5.1732	-64.067	-64.101	0	0
-5.1727	-64.067	-64.101	0	0
-5.1722	-64.067	-64.091	0	0
-5.1717	-64.072	-64.088	0	0
-5.1712	-64.081	-64.101	0	0
-5.1707	-64.091	-64.11	0	0
-5.1702	-64.105	-64.116	0	0
-5.1697	-64.116	-64.125	0	0
-5.1692	-64.122	-64.135	0	0
-5.1687	-64.128	-64.148	0	0
-5.1682	-64.14	-64.166	0	0
-5.1677	-64.153	-64.184	0	0
-5.1672	-64.205	-64.205	0	0
-5.1667	-64.277	-64.251	0	0
-5.1662	-64.344	-64.266	0	0
-5.1657	-64.354	-64.292	0	0
-5.1652	-64.36	-64.303	0	0
-5.1647	-64.383	-64.321	0	0
-5.1642	-64.413	-64.357	0	0
-5.1637	-64.447	-64.394	0	0
-5.1632	-64.477	-64.432	0	0
-5.1627	-64.524	-64.466	0	0
-5.1622	-64.581	-64.534	0	0
-5.1617	-64.597	-64.561	0	0
-5.1612	-64.622	-64.583	0	0
-5.1607	-64.65	-64.61	0	0
-5.1602	-64.676	-64.622	0	0
-5.1597	-64.684	-64.636	0	0
-5.1592	-64.697	-64.654	0	0
-5.1587	-64.712	-64.671	0	0
-5.1582	-64.727	-64.688	0	0
-5.1577	-64.744	-64.706	0	0
-5.1572	-64.76	-64.727	0	0
-5.1567	-64.783	-64.737	0	0
-5.1562	-64.799	-64.745	0	0
-5.1557	-64.804	-64.757	0	0
-5.1552	-64.812	-64.767	0	0
-5.1547	-64.817	-64.771	0	0
-5.1542	-64.817	-64.771	0	0
-5.1537	-64.813	-64.761	0	0
-5.1532	-64.813	-64.757	0	0
-5.1527	-64.813	-64.757	0	0
-5.1522	-64.813	-64.757	0	0
-5.1517	-64.813	-64.757	0	0
-5.1512	-64.809	-64.743	0	0
-5.1507	-64.8	-64.735	0	0
-5.1502	-64.684	-64.645	0	0
-5.1497	-64.662	-64.596	0	0
-5.1492	-64.606	-64.549	0	0
-5.1487	-64.529	-64.529	0	0
-5.1482	-64.5	-64.513	0	0
-5.1477	-64.465	-64.479	0	0
-5.1472	-64.45	-64.442	0	0
-5.1467	-64.45	-64.436	0	0
-5.1462	-64.448	-64.432	0	0
-5.1457	-64.436	-64.419	0	0
-5.1452	-64.426	-64.409	0	0
-5.1447	-64.422	-64.405	0	0
-5.1442	-64.417	-64.399	0	0
-5.1437	-64.417	-64.399	0	0
-5.1432	-64.417	-64.399	0	0
-5.1427	-64.417	-64.39	0	0
-5.1422	-64.399	-64.367	0	0
-5.1417	-64.382	-64.343	0	0
-5.1412	-64.369	-64.325	0	0
-5.1407	-64.352	-64.317	0	0
-5.1402	-64.333	-64.317	0	0
-5.1397	-64.322	-64.321	0	0
-5.1392	-64.295	-64.331	0	0
-5.1387	-64.263	-64.321	0	0
-5.1382	-64.257	-64.312	0	0
-5.1377	-64.24	-64.293	0	0
-5.1372	-64.225	-64.279	0	0
-5.1367	-64.222	-64.266	0	0
-5.1362	-64.209	-64.265	0	0
-5.1357	-64.192	-64.258	0	0
-5.1352	-64.189	-64.255	0	0
-5.1347	-64.189	-64.255	0	0
-5.1342	-64.189	-64.255	0	0
-5.1337	-64.174	-64.251	0	0
-5.1332	-64.182	-64.249	0	0
-5.1327	-64.203	-64.253	0	0
-5.1322	-64.219	-64.258	0	0
-5.1317	-64.222	-64.255	0	0
-5.1312	-64.215	-64.241	0	0
-5.1307	-64.214	-64.225	0	0
-5.1302	-64.214	-64.215	0	0
-5.1297	-64.214	-64.195	0	0
-5.1292	-64.217	-64.198	0	0
-5.1287	-64.238	-64.215	0	0
-5.1282	-64.261	-64.234	0	0
-5.1277	-64.294	-64.234	0	0
-5.1272	-64.306	-64.237	0	0
-5.1267	-64.312	-64.263	0	0
-5.1262	-64.32	-64.283	0	0
-5.1257	-64.342	-64.304	0	0
-5.1252	-64.373	-64.328	0	0
-5.1247	-64.403	-64.336	0	0
-5.1242	-64.422	-64.356	0	0
-5.1237	-64.448	-64.357	0	0
-5.1232	-64.477	-64.396	0	0
-5.1227	-64.506	-64.434	0	0
-5.1222	-64.534	-64.466	0	0
-5.1217	-64.561	-64.498	0	0
-5.1212	-64.585	-64.533	0	0
-5.1207	-64.607	-64.586	0	0
-5.1202	-64.654	-64.631	0	0
-5.1197	-64.697	-64.634	0	0
-5.1192	-64.717	-64.653	0	0
-5.1187	-64.728	-64.672	0	0
-5.1182	-64.729	-64.68	0	0
-5.1177	-64.729	-64.68	0	0
-5.1172	-64.729	-64.68	0	0
-5.1167	-64.729	-64.68	0	0
-5.1162	-64.734	-64.691	0	0
-5.1157	-64.745	-64.703	0	0
-5.1152	-64.752	-64.71	0	0
-5.1147	-64.752	-64.702	0	0
-5.1142	-64.742	-64.683	0	0
-5.1137	-64.729	-64.665	0	0
-5.1132	-64.718	-64.648	0	0
-5.1127	-64.703	-64.635	0	0
-5.1122	-64.694	-64.635	0	0
-5.1117	-64.694	-64.635	0	0
-5.1112	-64.694	-64.643	0	0
-5.1107	-64.694	-64.656	0	0
-5.1102	-64.694	-64.656	0	0
-5.1097	-64.7	-64.657	0	0
-5.1092	-64.722	-64.681	0	0
-5.1087	-64.746	-64.706	0	0
-5.1082	-64.77	-64.732	0	0
-5.1077	-64.794	-64.759	0	0
-5.1072	-64.814	-64.782	0	0
-5.1067	-64.867	-64.84	0	0
-5.1062	-64.92	-64.896	0	0
-5.1057	-64.97	-64.948	0	0
-5.1052	-65.027	-65.007	0	0
-5.1047	-65.08	-65.078	0	0
-5.1042	-65.095	-65.103	0	0
-5.1037	-65.119	-65.122	0	0
-5.1032	-65.132	-65.127	0	0
-5.1027	-65.132	-65.127	0	0
-5.1022	-65.132	-65.127	0	0
-5.1017	-65.132	-65.127	0	0
-5.1012	-65.132	-65.127	0	0
-5.1007	-65.132	-65.127	0	0
-5.1002	-65.132	-65.127	0	0
-5.0997	-65.108	-65.111	0	0
-5.0992	-65.083	-65.096	0	0
-5.0987	-65.03	-64.989	0	0
-5.0982	-65.017	-64.989	0	0
-5.0977	-65.017	-64.989	0	0
-5.0972	-65.017	-64.989	0	0
-5.0967	-65.017	-64.989	0	0
-5.0962	-65.017	-64.989	0	0
-5.0957	-65.017	-64.989	0	0
-5.0952	-65.016	-64.98	0	0
-5.0947	-65.013	-64.967	0	0
-5.0942	-65.011	-64.971	0	0
-5.0937	-65.007	-64.975	0	0
-5.0932	-64.984	-64.965	0	0
-5.0927	-64.984	-64.974	0	0
-5.0922	-64.984	-64.983	0	0
-5.0917	-64.984	-64.993	0	0
-5.0912	-64.984	-64.993	0	0
-5.0907	-64.984	-64.993	0	0
-5.0902	-64.984	-64.993	0	0
-5.0897	-64.921	-64.996	0	0
-5.0892	-64.909	-64.996	0	0
-5.0887	-64.909	-64.996	0	0
-5.0882	-64.909	-64.996	0	0
-5.0877	-64.899	-64.996	0	0
-5.0872	-64.877	-64.988	0	0
-5.0867	-64.855	-64.982	0	0
-5.0862	-64.85	-64.982	0	0
-5.0857	-64.85	-64.988	0	0
-5.0852	-64.857	-64.992	0	0
-5.0847	-64.874	-65	0	0
-5.0842	-64.88	-65	0	0
-5.0837	-64.865	-64.997	0	0
-5.0832	-64.842	-64.982	0	0
-5.0827	-64.838	-64.971	0	0
-5.0822	-64.838	-64.971	0	0
-5.0817	-64.838	-64.969	0	0
-5.0812	-64.838	-64.937	0	0
-5.0807	-64.803	-64.912	0	0
-5.0802	-64.777	-64.897	0	0
-5.0797	-64.593	-64.792	0	0
-5.0792	-64.561	-64.714	0	0
-5.0787	-64.52	-64.702	0	0
-5.0782	-64.501	-64.552	0	0
-5.0777	-64.478	-64.484	0	0
-5.0772	-64.444	-64.454	0	0
-5.0767	-64.441	-64.452	0	0
-5.0762	-64.425	-64.438	0	0
-5.0757	-64.41	-64.429	0	0
-5.0752	-64.401	-64.4	0	0
-5.0747	-64.368	-64.358	0	0
-5.0742	-64.322	-64.327	0	0
-5.0737	-64.318	-64.327	0	0
-5.0732	-64.313	-64.321	0	0
-5.0727	-64.313	-64.321	0	0
-5.0722	-64.313	-64.325	0	0
-5.0717	-64.334	-64.344	0	0
-5.0712	-64.352	-64.362	0	0
-5.0707	-64.354	-64.372	0	0
-5.0702	-64.354	-64.372	0	0
-5.0697	-64.354	-64.372	0	0
-5.0692	-64.335	-64.358	0	0
-5.0687	-64.308	-64.339	0	0
-5.0682	-64.283	-64.321	0	0
-5.0677	-64.256	-64.316	0	0
-5.0672	-64.248	-64.313	0	0
-5.0667	-64.248	-64.313	0	0
-5.0662	-64.248	-64.313	0	0
-5.0657	-64.233	-64.313	0	0
-5.0652	-64.229	-64.31	0	0
-5.0647	-64.233	-64.306	0	0
-5.0642	-64.264	-64.306	0	0
-5.0637	-64.302	-64.313	0	0
-5.0632	-64.306	-64.317	0	0
-5.0627	-64.306	-64.317	0	0
-5.0622	-64.306	-64.317	0	0
-5.0617	-64.306	-64.317	0	0
-5.0612	-64.306	-64.317	0	0
-5.0607	-64.307	-64.317	0	0
-5.0602	-64.318	-64.318	0	0
-5.0597	-64.359	-64.35	0	0
-5.0592	-64.435	-64.413	0	0
-5.0587	-64.51	-64.496	0	0
-5.0582	-64.576	-64.566	0	0
-5.0577	-64.635	-64.626	0	0
-5.0572	-64.686	-64.659	0	0
-5.0567	-64.732	-64.672	0	0
-5.0562	-64.772	-64.689	0	0
-5.0557	-64.772	-64.689	0	0
-5.0552	-64.772	-64.689	0	0
-5.0547	-64.772	-64.689	0	0
-5.0542	-64.772	-64.689	0	0
-5.0537	-64.772	-64.689	0	0
-5.0532	-64.772	-64.689	0	0
-5.0527	-64.772	-64.688	0	0
-5.0522	-64.772	-64.666	0	0
-5.0517	-64.724	-64.642	0	0
-5.0512	-64.558	-64.406	0	0
-5.0507	-64.302	-64.241	0	0
-5.0502	-64.302	-64.241	0	0
-5.0497	-64.302	-64.241	0	0
-5.0492	-64.262	-64.241	0	0
-5.0487	-64.262	-64.241	0	0
-5.0482	-64.262	-64.241	0	0
-5.0477	-64.262	-64.241	0	0
-5.0472	-64.262	-64.241	0	0
-5.0467	-64.262	-64.241	0	0
-5.0462	-64.285	-64.251	0	0
-5.0457	-64.331	-64.271	0	0
-5.0452	-64.379	-64.306	0	0
-5.0447	-64.423	-64.319	0	0
-5.0442	-64.45	-64.338	0	0
-5.0437	-64.46	-64.355	0	0
-5.0432	-64.466	-64.364	0	0
-5.0427	-64.466	-64.365	0	0
-5.0422	-64.466	-64.366	0	0
-5.0417	-64.466	-64.379	0	0
-5.0412	-64.475	-64.385	0	0
-5.0407	-64.49	-64.39	0	0
-5.0402	-64.496	-64.412	0	0
-5.0397	-64.507	-64.432	0	0
-5.0392	-64.516	-64.437	0	0
-5.0387	-64.516	-64.442	0	0
-5.0382	-64.518	-64.442	0	0
-5.0377	-64.518	-64.442	0	0
-5.0372	-64.518	-64.442	0	0
-5.0367	-64.518	-64.442	0	0
-5.0362	-64.483	-64.45	0	0
-5.0357	-64.465	-64.458	0	0
-5.0352	-64.465	-64.454	0	0
-5.0347	-64.467	-64.431	0	0
-5.0342	-64.494	-64.432	0	0
-5.0337	-64.5	-64.45	0	0
-5.0332	-64.5	-64.45	0	0
-5.0327	-64.5	-64.442	0	0
-5.0322	-64.494	-64.429	0	0
-5.0317	-64.489	-64.429	0	0
-5.0312	-64.489	-64.429	0	0
-5.0307	-64.489	-64.429	0	0
-5.0302	-64.489	-64.429	0	0
-5.0297	-64.494	-64.438	0	0
-5.0292	-64.5	-64.457	0	0
-5.0287	-64.512	-64.475	0	0
-5.0282	-64.526	-64.493	0	0
-5.0277	-64.538	-64.517	0	0
-5.0272	-64.552	-64.543	0	0
-5.0267	-64.602	-64.586	0	0
-5.0262	-64.649	-64.634	0	0
-5.0257	-64.679	-64.678	0	0
-5.0252	-64.679	-64.693	0	0
-5.0247	-64.701	-64.697	0	0
-5.0242	-64.723	-64.715	0	0
-5.0237	-64.743	-64.734	0	0
-5.0232	-64.762	-64.752	0	0
-5.0227	-64.778	-64.768	0	0
-5.0222	-64.794	-64.785	0	0
-5.0217	-64.809	-64.8	0	0
-5.0212	-64.823	-64.808	0	0
-5.0207	-64.823	-64.808	0	0
-5.0202	-64.823	-64.808	0	0
-5.0197	-64.823	-64.808	0	0
-5.0192	-64.815	-64.795	0	0
-5.0187	-64.795	-64.77	0	0
-5.0182	-64.767	-64.746	0	0
-5.0177	-64.735	-64.728	0	0
-5.0172	-64.69	-64.703	0	0
-5.0167	-64.681	-64.677	0	0
-5.0162	-64.564	-64.63	0	0
-5.0157	-64.529	-64.615	0	0
-5.0152	-64.513	-64.593	0	0
-5.0147	-64.493	-64.582	0	0
-5.0142	-64.472	-64.567	0	0
-5.0137	-64.451	-64.552	0	0
-5.0132	-64.428	-64.539	0	0
-5.0127	-64.405	-64.528	0	0
-5.0122	-64.384	-64.486	0	0
-5.0117	-64.367	-64.448	0	0
-5.0112	-64.36	-64.425	0	0
-5.0107	-64.244	-64.31	0	0
-5.0102	-64.148	-64.252	0	0
-5.0097	-64.098	-64.224	0	0
-5.0092	-64.044	-64.181	0	0
-5.0087	-64.01	-64.143	0	0
-5.0082	-63.982	-64.124	0	0
-5.0077	-63.937	-64.089	0	0
-5.0072	-63.908	-64.062	0	0
-5.0067	-63.891	-64.062	0	0
-5.0062	-63.876	-64.062	0	0
-5.0057	-63.876	-64.062	0	0
-5.0052	-63.876	-64.062	0	0
-5.0047	-63.876	-64.062	0	0
-5.0042	-63.876	-64.062	0	0
-5.0037	-63.877	-64.062	0	0
-5.0032	-63.898	-64.073	0	0
-5.0027	-63.912	-64.093	0	0
-5.0022	-63.949	-64.113	0	0
-5.0017	-64.008	-64.146	0	0
-5.0012	-64.084	-64.215	0	0
-5.0007	-64.139	-64.227	0	0
-5.0002	-64.139	-64.227	0	0
-4.9997	-64.139	-64.227	0	0
-4.9992	-64.139	-64.227	0	0
-4.9987	-64.146	-64.227	0	0
-4.9982	-64.165	-64.243	0	0
-4.9977	-64.182	-64.253	0	0
-4.9972	-64.182	-64.253	0	0
-4.9967	-64.192	-64.253	0	0
-4.9962	-64.207	-64.253	0	0
-4.9957	-64.207	-64.253	0	0
-4.9952	-64.207	-64.253	0	0
-4.9947	-64.207	-64.253	0	0
-4.9942	-64.207	-64.253	0	0
-4.9937	-64.207	-64.253	0	0
-4.9932	-64.22	-64.253	0	0
-4.9927	-64.248	-64.272	0	0
-4.9922	-64.281	-64.299	0	0
-4.9917	-64.324	-64.313	0	0
-4.9912	-64.348	-64.344	0	0
-4.9907	-64.358	-64.381	0	0
-4.9902	-64.375	-64.401	0	0
-4.9897	-64.383	-64.409	0	0
-4.9892	-64.383	-64.409	0	0
-4.9887	-64.383	-64.409	0	0
-4.9882	-64.383	-64.409	0	0
-4.9877	-64.383	-64.409	0	0
-4.9872	-64.393	-64.416	0	0
-4.9867	-64.393	-64.416	0	0
-4.9862	-64.411	-64.429	0	0
-4.9857	-64.442	-64.452	0	0
-4.9852	-64.476	-64.485	0	0
-4.9847	-64.503	-64.514	0	0
-4.9842	-64.525	-64.534	0	0
-4.9837	-64.55	-64.556	0	0
-4.9832	-64.56	-64.578	0	0
-4.9827	-64.552	-64.578	0	0
-4.9822	-64.552	-64.578	0	0
-4.9817	-64.552	-64.588	0	0
-4.9812	-64.565	-64.602	0	0
-4.9807	-64.586	-64.617	0	0
-4.9802	-64.597	-64.619	0	0
-4.9797	-64.597	-64.619	0	0
-4.9792	-64.597	-64.619	0	0
-4.9787	-64.597	-64.619	0	0
-4.9782	-64.597	-64.619	0	0
-4.9777	-64.597	-64.619	0	0
-4.9772	-64.597	-64.619	0	0
-4.9767	-64.575	-64.606	0	0
-4.9762	-64.552	-64.595	0	0
-4.9757	-64.468	-64.486	0	0
-4.9752	-64.442	-64.465	0	0
-4.9747	-64.427	-64.455	0	0
-4.9742	-64.4	-64.413	0	0
-4.9737	-64.362	-64.377	0	0
-4.9732	-64.332	-64.348	0	0
-4.9727	-64.307	-64.339	0	0
-4.9722	-64.289	-64.315	0	0
-4.9717	-64.277	-64.305	0	0
-4.9712	-64.253	-64.279	0	0
-4.9707	-64.23	-64.265	0	0
-4.9702	-64.216	-64.252	0	0
-4.9697	-64.201	-64.23	0	0
-4.9692	-64.192	-64.207	0	0
-4.9687	-64.191	-64.193	0	0
-4.9682	-64.179	-64.158	0	0
-4.9677	-64.179	-64.158	0	0
-4.9672	-64.116	-64.106	0	0
-4.9667	-64.104	-64.075	0	0
-4.9662	-64.063	-64.048	0	0
-4.9657	-64.045	-64.016	0	0
-4.9652	-64.026	-64.002	0	0
-4.9647	-64.018	-63.986	0	0
-4.9642	-64.018	-63.986	0	0
-4.9637	-64.018	-63.975	0	0
-4.9632	-64.018	-63.966	0	0
-4.9627	-64.019	-63.966	0	0
-4.9622	-64.034	-63.971	0	0
-4.9617	-64.05	-63.983	0	0
-4.9612	-64.063	-63.996	0	0
-4.9607	-64.072	-64.005	0	0
-4.9602	-64.086	-64.005	0	0
-4.9597	-64.086	-64.005	0	0
-4.9592	-64.104	-64.014	0	0
-4.9587	-64.137	-64.043	0	0
-4.9582	-64.185	-64.08	0	0
-4.9577	-64.204	-64.103	0	0
-4.9572	-64.23	-64.134	0	0
-4.9567	-64.257	-64.165	0	0
-4.9562	-64.312	-64.23	0	0
-4.9557	-64.344	-64.291	0	0
-4.9552	-64.344	-64.291	0	0
-4.9547	-64.344	-64.291	0	0
-4.9542	-64.344	-64.291	0	0
-4.9537	-64.344	-64.291	0	0
-4.9532	-64.344	-64.291	0	0
-4.9527	-64.344	-64.291	0	0
-4.9522	-64.344	-64.291	0	0
-4.9517	-64.344	-64.291	0	0
-4.9512	-64.342	-64.301	0	0
-4.9507	-64.342	-64.301	0	0
-4.9502	-64.342	-64.301	0	0
-4.9497	-64.342	-64.301	0	0
-4.9492	-64.342	-64.301	0	0
-4.9487	-64.342	-64.301	0	0
-4.9482	-64.342	-64.301	0	0
-4.9477	-64.342	-64.301	0	0
-4.9472	-64.351	-64.301	0	0
-4.9467	-64.403	-64.361	0	0
-4.9462	-64.469	-64.434	0	0
-4.9457	-64.53	-64.448	0	0
-4.9452	-64.537	-64.466	0	0
-4.9447	-64.551	-64.487	0	0
-4.9442	-64.61	-64.518	0	0
-4.9437	-64.682	-64.598	0	0
-4.9432	-64.752	-64.676	0	0
-4.9427	-64.816	-64.746	0	0
-4.9422	-64.873	-64.81	0	0
-4.9417	-64.898	-64.851	0	0
-4.9412	-64.9	-64.853	0	0
-4.9407	-64.917	-64.872	0	0
-4.9402	-64.935	-64.89	0	0
-4.9397	-64.952	-64.908	0	0
-4.9392	-64.966	-64.925	0	0
-4.9387	-64.98	-64.94	0	0
-4.9382	-64.992	-64.954	0	0
-4.9377	-65.004	-64.968	0	0
-4.9372	-65.014	-64.98	0	0
-4.9367	-65.024	-64.991	0	0
-4.9362	-65.032	-65	0	0
-4.9357	-65.029	-65	0	0
-4.9352	-65.016	-64.987	0	0
-4.9347	-65.001	-64.969	0	0
-4.9342	-64.986	-64.951	0	0
-4.9337	-64.967	-64.929	0	0
-4.9332	-64.955	-64.915	0	0
-4.9327	-64.955	-64.915	0	0
-4.9322	-64.955	-64.915	0	0
-4.9317	-64.955	-64.915	0	0
-4.9312	-64.924	-64.889	0	0
-4.9307	-64.902	-64.865	0	0
-4.9302	-64.891	-64.862	0	0
-4.9297	-64.891	-64.862	0	0
-4.9292	-64.891	-64.862	0	0
-4.9287	-64.891	-64.862	0	0
-4.9282	-64.891	-64.862	0	0
-4.9277	-64.891	-64.862	0	0
-4.9272	-64.888	-64.857	0	0
-4.9267	-64.882	-64.853	0	0
-4.9262	-64.865	-64.847	0	0
-4.9257	-64.851	-64.837	0	0
-4.9252	-64.852	-64.838	0	0
-4.9247	-64.869	-64.857	0	0
-4.9242	-64.886	-64.874	0	0
-4.9237	-64.895	-64.881	0	0
-4.9232	-64.895	-64.881	0	0
-4.9227	-64.895	-64.881	0	0
-4.9222	-64.895	-64.881	0	0
-4.9217	-64.895	-64.881	0	0
-4.9212	-64.876	-64.857	0	0
-4.9207	-64.852	-64.827	0	0
-4.9202	-64.826	-64.795	0	0
-4.9197	-64.805	-64.772	0	0
-4.9192	-64.754	-64.585	0	0
-4.9187	-64.666	-64.556	0	0
-4.9182	-64.578	-64.536	0	0
-4.9177	-64.545	-64.523	0	0
-4.9172	-64.512	-64.508	0	0
-4.9167	-64.48	-64.483	0	0
-4.9162	-64.467	-64.459	0	0
-4.9157	-64.467	-64.456	0	0
-4.9152	-64.467	-64.456	0	0
-4.9147	-64.467	-64.456	0	0
-4.9142	-64.467	-64.456	0	0
-4.9137	-64.467	-64.456	0	0
-4.9132	-64.485	-64.469	0	0
-4.9127	-64.511	-64.493	0	0
-4.9122	-64.536	-64.517	0	0
-4.9117	-64.56	-64.54	0	0
-4.9112	-64.581	-64.563	0	0
-4.9107	-64.583	-64.57	0	0
-4.9102	-64.58	-64.553	0	0
-4.9097	-64.58	-64.553	0	0
-4.9092	-64.58	-64.553	0	0
-4.9087	-64.58	-64.553	0	0
-4.9082	-64.58	-64.553	0	0
-4.9077	-64.58	-64.564	0	0
-4.9072	-64.598	-64.585	0	0
-4.9067	-64.619	-64.606	0	0
-4.9062	-64.64	-64.628	0	0
-4.9057	-64.644	-64.647	0	0
-4.9052	-64.636	-64.653	0	0
-4.9047	-64.605	-64.653	0	0
-4.9042	-64.574	-64.645	0	0
-4.9037	-64.561	-64.614	0	0
-4.9032	-64.55	-64.582	0	0
-4.9027	-64.524	-64.554	0	0
-4.9022	-64.514	-64.555	0	0
-4.9017	-64.536	-64.58	0	0
-4.9012	-64.552	-64.604	0	0
-4.9007	-64.557	-64.62	0	0
-4.9002	-64.557	-64.62	0	0
-4.8997	-64.557	-64.62	0	0
-4.8992	-64.561	-64.622	0	0
-4.8987	-64.566	-64.638	0	0
-4.8982	-64.566	-64.652	0	0
-4.8977	-64.559	-64.652	0	0
-4.8972	-64.559	-64.652	0	0
-4.8967	-64.559	-64.652	0	0
-4.8962	-64.56	-64.652	0	0
-4.8957	-64.569	-64.652	0	0
-4.8952	-64.584	-64.658	0	0
-4.8947	-64.601	-64.67	0	0
-4.8942	-64.619	-64.684	0	0
-4.8937	-64.638	-64.699	0	0
-4.8932	-64.655	-64.712	0	0
-4.8927	-64.683	-64.731	0	0
-4.8922	-64.753	-64.797	0	0
-4.8917	-64.785	-64.807	0	0
-4.8912	-64.785	-64.807	0	0
-4.8907	-64.785	-64.807	0	0
-4.8902	-64.785	-64.807	0	0
-4.8897	-64.785	-64.807	0	0
-4.8892	-64.785	-64.807	0	0
-4.8887	-64.785	-64.807	0	0
-4.8882	-64.785	-64.807	0	0
-4.8877	-64.785	-64.785	0	0
-4.8872	-64.68	-64.654	0	0
-4.8867	-64.67	-64.654	0	0
-4.8862	-64.67	-64.654	0	0
-4.8857	-64.67	-64.654	0	0
-4.8852	-64.67	-64.654	0	0
-4.8847	-64.67	-64.654	0	0
-4.8842	-64.67	-64.654	0	0
-4.8837	-64.67	-64.654	0	0
-4.8832	-64.67	-64.654	0	0
-4.8827	-64.681	-64.673	0	0
-4.8822	-64.73	-64.744	0	0
-4.8817	-64.791	-64.803	0	0
-4.8812	-64.842	-64.854	0	0
-4.8807	-64.886	-64.896	0	0
-4.8802	-64.923	-64.932	0	0
-4.8797	-64.954	-64.963	0	0
-4.8792	-64.981	-64.989	0	0
-4.8787	-65.004	-65.011	0	0
-4.8782	-65.024	-65.03	0	0
-4.8777	-65.041	-65.046	0	0
-4.8772	-65.056	-65.061	0	0
-4.8767	-65.081	-65.085	0	0
-4.8762	-65.113	-65.117	0	0
-4.8757	-65.147	-65.151	0	0
-4.8752	-65.178	-65.181	0	0
-4.8747	-65.205	-65.208	0	0
-4.8742	-65.227	-65.23	0	0
-4.8737	-65.245	-65.247	0	0
-4.8732	-65.257	-65.26	0	0
-4.8727	-65.266	-65.268	0	0
-4.8722	-65.271	-65.273	0	0
-4.8717	-65.273	-65.275	0	0
-4.8712	-65.274	-65.276	0	0
-4.8707	-65.274	-65.276	0	0
-4.8702	-65.274	-65.276	0	0
-4.8697	-65.274	-65.276	0	0
-4.8692	-65.274	-65.276	0	0
-4.8687	-65.274	-65.276	0	0
-4.8682	-65.274	-65.276	0	0
-4.8677	-65.274	-65.276	0	0
-4.8672	-65.265	-65.276	0	0
-4.8667	-65.103	-65.112	0	0
-4.8662	-65.088	-65.099	0	0
-4.8657	-65.075	-65.086	0	0
-4.8652	-64.973	-65.055	0	0
-4.8647	-64.916	-64.985	0	0
-4.8642	-64.903	-64.979	0	0
-4.8637	-64.875	-64.933	0	0
-4.8632	-64.807	-64.839	0	0
-4.8627	-64.801	-64.834	0	0
-4.8622	-64.801	-64.834	0	0
-4.8617	-64.801	-64.834	0	0
-4.8612	-64.801	-64.834	0	0
-4.8607	-64.795	-64.828	0	0
-4.8602	-64.787	-64.819	0	0
-4.8597	-64.78	-64.812	0	0
-4.8592	-64.776	-64.801	0	0
-4.8587	-64.776	-64.784	0	0
-4.8582	-64.776	-64.784	0	0
-4.8577	-64.776	-64.784	0	0
-4.8572	-64.786	-64.79	0	0
-4.8567	-64.8	-64.804	0	0
-4.8562	-64.806	-64.805	0	0
-4.8557	-64.806	-64.805	0	0
-4.8552	-64.806	-64.805	0	0
-4.8547	-64.806	-64.798	0	0
-4.8542	-64.806	-64.772	0	0
-4.8537	-64.785	-64.742	0	0
-4.8532	-64.764	-64.711	0	0
-4.8527	-64.746	-64.684	0	0
-4.8522	-64.735	-64.664	0	0
-4.8517	-64.731	-64.653	0	0
-4.8512	-64.694	-64.447	0	0
-4.8507	-64.565	-64.436	0	0
-4.8502	-64.425	-64.422	0	0
-4.8497	-64.4	-64.404	0	0
-4.8492	-64.39	-64.387	0	0
-4.8487	-64.363	-64.361	0	0
-4.8482	-64.344	-64.329	0	0
-4.8477	-64.344	-64.318	0	0
-4.8472	-64.344	-64.318	0	0
-4.8467	-64.344	-64.318	0	0
-4.8462	-64.344	-64.318	0	0
-4.8457	-64.351	-64.318	0	0
-4.8452	-64.374	-64.329	0	0
-4.8447	-64.385	-64.329	0	0
-4.8442	-64.394	-64.337	0	0
-4.8437	-64.395	-64.337	0	0
-4.8432	-64.408	-64.337	0	0
-4.8427	-64.428	-64.358	0	0
-4.8422	-64.449	-64.384	0	0
-4.8417	-64.479	-64.389	0	0
-4.8412	-64.51	-64.402	0	0
-4.8407	-64.54	-64.421	0	0
-4.8402	-64.568	-64.442	0	0
-4.8397	-64.579	-64.463	0	0
-4.8392	-64.588	-64.482	0	0
-4.8387	-64.6	-64.502	0	0
-4.8382	-64.613	-64.521	0	0
-4.8377	-64.624	-64.526	0	0
-4.8372	-64.624	-64.526	0	0
-4.8367	-64.635	-64.547	0	0
-4.8362	-64.649	-64.571	0	0
-4.8357	-64.692	-64.603	0	0
-4.8352	-64.732	-64.64	0	0
-4.8347	-64.75	-64.64	0	0
-4.8342	-64.75	-64.64	0	0
-4.8337	-64.75	-64.64	0	0
-4.8332	-64.75	-64.64	0	0
-4.8327	-64.75	-64.64	0	0
-4.8322	-64.75	-64.64	0	0
-4.8317	-64.75	-64.64	0	0
-4.8312	-64.75	-64.644	0	0
-4.8307	-64.756	-64.659	0	0
-4.8302	-64.768	-64.659	0	0
-4.8297	-64.768	-64.659	0	0
-4.8292	-64.752	-64.645	0	0
-4.8287	-64.726	-64.62	0	0
-4.8282	-64.702	-64.61	0	0
-4.8277	-64.686	-64.592	0	0
-4.8272	-64.675	-64.579	0	0
-4.8267	-64.668	-64.555	0	0
-4.8262	-64.666	-64.562	0	0
-4.8257	-64.653	-64.578	0	0
-4.8252	-64.659	-64.589	0	0
-4.8247	-64.669	-64.603	0	0
-4.8242	-64.677	-64.618	0	0
-4.8237	-64.681	-64.626	0	0
-4.8232	-64.681	-64.626	0	0
-4.8227	-64.676	-64.635	0	0
-4.8222	-64.676	-64.635	0	0
-4.8217	-64.676	-64.635	0	0
-4.8212	-64.676	-64.635	0	0
-4.8207	-64.676	-64.635	0	0
-4.8202	-64.679	-64.659	0	0
-4.8197	-64.692	-64.684	0	0
-4.8192	-64.716	-64.702	0	0
-4.8187	-64.738	-64.713	0	0
-4.8182	-64.76	-64.725	0	0
-4.8177	-64.781	-64.74	0	0
-4.8172	-64.81	-64.74	0	0
-4.8167	-64.81	-64.74	0	0
-4.8162	-64.81	-64.74	0	0
-4.8157	-64.81	-64.73	0	0
-4.8152	-64.81	-64.717	0	0
-4.8147	-64.829	-64.73	0	0
-4.8142	-64.852	-64.747	0	0
-4.8137	-64.864	-64.765	0	0
-4.8132	-64.871	-64.777	0	0
-4.8127	-64.881	-64.777	0	0
-4.8122	-64.886	-64.777	0	0
-4.8117	-64.886	-64.779	0	0
-4.8112	-64.895	-64.804	0	0
-4.8107	-64.901	-64.829	0	0
-4.8102	-64.909	-64.852	0	0
-4.8097	-64.91	-64.873	0	0
-4.8092	-64.91	-64.901	0	0
-4.8087	-64.909	-64.901	0	0
-4.8082	-64.909	-64.901	0	0
-4.8077	-64.909	-64.901	0	0
-4.8072	-64.909	-64.901	0	0
-4.8067	-64.909	-64.901	0	0
-4.8062	-64.909	-64.901	0	0
-4.8057	-64.909	-64.901	0	0
-4.8052	-64.901	-64.901	0	0
-4.8047	-64.888	-64.831	0	0
-4.8042	-64.591	-64.55	0	0
-4.8037	-64.535	-64.519	0	0
-4.8032	-64.499	-64.493	0	0
-4.8027	-64.459	-64.478	0	0
-4.8022	-64.419	-64.45	0	0
-4.8017	-64.396	-64.442	0	0
-4.8012	-64.396	-64.442	0	0
-4.8007	-64.396	-64.442	0	0
-4.8002	-64.396	-64.442	0	0
-4.7997	-64.394	-64.422	0	0
-4.7992	-64.37	-64.396	0	0
-4.7987	-64.353	-64.377	0	0
-4.7982	-64.354	-64.377	0	0
-4.7977	-64.377	-64.396	0	0
-4.7972	-64.398	-64.418	0	0
-4.7967	-64.399	-64.431	0	0
-4.7962	-64.399	-64.431	0	0
-4.7957	-64.402	-64.431	0	0
-4.7952	-64.436	-64.453	0	0
-4.7947	-64.469	-64.488	0	0
-4.7942	-64.499	-64.522	0	0
-4.7937	-64.529	-64.555	0	0
-4.7932	-64.558	-64.586	0	0
-4.7927	-64.584	-64.615	0	0
-4.7922	-64.641	-64.652	0	0
-4.7917	-64.712	-64.722	0	0
-4.7912	-64.776	-64.785	0	0
-4.7907	-64.791	-64.808	0	0
-4.7902	-64.808	-64.822	0	0
-4.7897	-64.827	-64.84	0	0
-4.7892	-64.846	-64.857	0	0
-4.7887	-64.864	-64.875	0	0
-4.7882	-64.882	-64.892	0	0
-4.7877	-64.898	-64.908	0	0.0029188
-4.7872	-64.914	-64.919	0	0.0062479
-4.7867	-64.914	-64.919	0	0.0068991
-4.7862	-64.914	-64.919	0	0.0076134
-4.7857	-64.914	-64.919	0	0.0083964
-4.7852	-64.907	-64.91	0.0068441	0.0092542
-4.7847	-64.905	-64.903	0.0075605	0.010193
-4.7842	-64.897	-64.893	0.0083466	0.011221
-4.7837	-64.887	-64.882	0.0092088	0.012344
-4.7832	-64.887	-64.88	0.010154	0.017512
-4.7827	-64.887	-64.88	0.011188	0.021289
-4.7822	-64.887	-64.88	0.012321	0.023414
-4.7817	-64.887	-64.872	0.01356	0.025736
-4.7812	-64.869	-64.852	0.014913	0.028271
-4.7807	-64.853	-64.836	0.016392	0.031036
-4.7802	-64.843	-64.829	0.024885	0.034051
-4.7797	-64.761	-64.735	0.027365	0.037335
-4.7792	-64.734	-64.702	0.030075	0.04091
-4.7787	-64.71	-64.67	0.033032	0.044801
-4.7782	-64.657	-64.651	0.036257	0.049031
-4.7777	-64.501	-64.492	0.039773	0.053627
-4.7772	-64.444	-64.448	0.043603	0.058618
-4.7767	-64.432	-64.431	0.047772	0.064034
-4.7762	-64.331	-64.421	0.052307	0.069907
-4.7757	-64.286	-64.41	0.057238	0.076271
-4.7752	-64.261	-64.401	0.062595	0.083163
-4.7747	-64.235	-64.39	0.068411	0.090622
-4.7742	-64.226	-64.374	0.074721	0.098689
-4.7737	-64.226	-64.363	0.081563	0.10741
-4.7732	-64.226	-64.353	0.088977	0.11682
-4.7727	-64.226	-64.34	0.097004	0.12699
-4.7722	-64.226	-64.32	0.10569	0.13795
-4.7717	-64.229	-64.309	0.11508	0.14977
-4.7712	-64.229	-64.309	0.12524	0.16249
-4.7707	-64.229	-64.304	0.1362	0.1762
-4.7702	-64.242	-64.286	0.14803	0.19093
-4.7697	-64.242	-64.286	0.16079	0.20678
-4.7692	-64.242	-64.267	0.17454	0.22379
-4.7687	-64.262	-64.262	0.18935	0.24206
-4.7682	-64.258	-64.253	0.20529	0.26166
-4.7677	-64.263	-64.253	0.22243	0.28267
-4.7672	-64.272	-64.253	0.24086	0.30518
-4.7667	-64.283	-64.255	0.26066	0.32928
-4.7662	-64.295	-64.266	0.2819	0.35506
-4.7657	-64.307	-64.276	0.30469	0.38263
-4.7652	-64.313	-64.278	0.32912	0.41208
-4.7647	-64.322	-64.284	0.35529	0.44352
-4.7642	-64.335	-64.306	0.38331	0.47706
-4.7637	-64.354	-64.326	0.41328	0.51283
-4.7632	-64.376	-64.355	0.44531	0.55094
-4.7627	-64.433	-64.434	0.47954	0.59151
-4.7622	-64.508	-64.507	0.51608	0.63468
-4.7617	-64.575	-64.574	0.55505	0.68057
-4.7612	-64.641	-64.648	0.59661	0.72934
-4.7607	-64.641	-64.663	0.64088	0.78111
-4.7602	-64.641	-64.663	0.68801	0.83605
-4.7597	-64.641	-64.663	0.73815	0.89429
-4.7592	-64.641	-64.663	0.79146	0.95601
-4.7587	-64.641	-64.663	0.84809	1.0213
-4.7582	-64.641	-64.663	0.90822	1.0905
-4.7577	-64.641	-64.663	0.97201	1.1636
-4.7572	-64.641	-64.663	1.0396	1.2408
-4.7567	-64.506	-64.641	1.1113	1.3223
-4.7562	-64.498	-64.544	1.1871	1.4083
-4.7557	-64.498	-64.544	1.2674	1.499
-4.7552	-64.498	-64.544	1.3522	1.5946
-4.7547	-64.498	-64.544	1.4419	1.6952
-4.7542	-64.498	-64.544	1.5365	1.801
-4.7537	-64.498	-64.544	1.6363	1.9122
-4.7532	-64.498	-64.544	1.7416	2.0291
-4.7527	-64.498	-64.544	1.8525	2.1517
-4.7522	-64.513	-64.547	1.9692	2.2804
-4.7517	-64.571	-64.601	2.092	2.4153
-4.7512	-64.623	-64.644	2.221	2.5565
-4.7507	-64.663	-64.656	2.3566	2.7044
-4.7502	-64.663	-64.657	2.4989	2.859
-4.7497	-64.663	-64.657	2.6482	3.0206
-4.7492	-64.663	-64.657	2.8047	3.1894
-4.7487	-64.67	-64.663	2.9685	3.3656
-4.7482	-64.691	-64.675	3.1401	3.5492
-4.7477	-64.711	-64.688	3.3194	3.7406
-4.7472	-64.718	-64.702	3.5069	3.9399
-4.7467	-64.726	-64.721	3.7027	4.1472
-4.7462	-64.738	-64.735	3.907	4.3627
-4.7457	-64.738	-64.723	4.12	4.5866
-4.7452	-64.727	-64.693	4.342	4.819
-4.7447	-64.718	-64.678	4.5731	5.0601
-4.7442	-64.718	-64.673	4.8136	5.3099
-4.7437	-64.718	-64.673	5.0636	5.5687
-4.7432	-64.718	-64.664	5.3232	5.8364
-4.7427	-64.719	-64.667	5.5928	6.1132
-4.7422	-64.733	-64.677	5.8724	6.3992
-4.7417	-64.759	-64.687	6.1621	6.6945
-4.7412	-64.787	-64.706	6.4622	6.999
-4.7407	-64.816	-64.724	6.7727	7.3129
-4.7402	-64.821	-64.734	7.0938	7.6362
-4.7397	-64.821	-64.734	7.4255	7.9688
-4.7392	-64.821	-64.727	7.7679	8.3107
-4.7387	-64.821	-64.697	8.1212	8.662
-4.7382	-64.819	-64.671	8.4852	9.0226
-4.7377	-64.769	-64.648	8.8602	9.3923
-4.7372	-64.741	-64.643	9.246	9.7712
-4.7367	-64.741	-64.643	9.6426	10.159
-4.7362	-64.741	-64.643	10.05	10.556
-4.7357	-64.595	-64.522	10.468	10.961
-4.7352	-64.389	-64.317	10.897	11.375
-4.7347	-64.354	-64.279	11.337	11.798
-4.7342	-64.294	-64.221	11.787	12.228
-4.7337	-64.179	-64.024	12.247	12.667
-4.7332	-64.147	-63.98	12.718	13.113
-4.7327	-63.788	-63.61	13.198	13.566
-4.7322	-63.494	-63.291	13.688	14.026
-4.7317	-63.318	-63	14.188	14.493
-4.7312	-63.07	-62.968	14.697	14.967
-4.7307	-63.02	-62.926	15.214	15.446
-4.7302	-62.932	-62.842	15.741	15.931
-4.7297	-62.828	-62.755	16.275	16.42
-4.7292	-62.723	-62.677	16.817	16.915
-4.7287	-62.584	-62.586	17.367	17.413
-4.7282	-62.442	-62.509	17.923	17.916
-4.7277	-62.366	-62.311	18.486	18.421
-4.7272	-62.318	-61.992	19.055	18.929
-4.7267	-62.263	-61.977	19.629	19.439
-4.7262	-62.141	-61.849	20.208	19.95
-4.7257	-61.985	-61.701	20.792	20.462
-4.7252	-61.835	-61.559	21.379	20.977
-4.7247	-61.672	-61.378	21.969	21.492
-4.7242	-61.493	-61.161	22.562	22.003
-4.7237	-61.317	-60.944	23.156	22.513
-4.7232	-61.17	-60.749	23.751	23.02
-4.7227	-61.043	-60.581	24.347	23.525
-4.7222	-60.965	-60.505	24.95	24.025
-4.7217	-60.741	-60.157	25.544	24.521
-4.7212	-60.176	-59.454	26.137	25.012
-4.7207	-59.961	-59.339	26.728	25.497
-4.7202	-59.961	-59.339	27.314	25.976
-4.7197	-59.961	-59.339	27.897	26.448
-4.7192	-59.961	-59.339	28.475	26.913
-4.7187	-59.961	-59.339	29.047	27.371
-4.7182	-59.961	-59.339	29.612	27.818
-4.7177	-59.903	-59.242	30.169	28.254
-4.7172	-59.781	-59.113	30.719	28.679
-4.7167	-59.706	-59.006	31.259	29.093
-4.7162	-59.613	-58.933	31.789	29.495
-4.7157	-59.605	-58.933	32.309	29.884
-4.7152	-59.605	-58.933	32.817	30.26
-4.7147	-59.605	-58.933	33.312	30.623
-4.7142	-59.605	-58.933	33.794	30.971
-4.7137	-59.605	-58.933	34.263	31.304
-4.7132	-59.605	-58.933	34.717	31.621
-4.7127	-59.537	-58.783	35.155	31.922
-4.7122	-59.054	-57.94	35.578	32.207
-4.7117	-58.362	-57.202	35.983	32.475
-4.7112	-58.221	-57.138	36.371	32.725
-4.7107	-57.977	-56.806	36.741	32.957
-4.7102	-57.189	-55.856	37.092	33.172
-4.7097	-56.658	-55.085	37.424	33.368
-4.7092	-56.567	-54.287	37.736	33.545
-4.7087	-56.413	-53.878	38.028	33.703
-4.7082	-56.261	-53.751	38.299	33.842
-4.7077	-56.117	-48.471	38.548	33.962
-4.7072	-55.983	-48.277	38.776	34.062
-4.7067	-55.889	-47.859	38.982	34.086
-4.7062	-55.221	-47.135	39.166	34.086
-4.7057	-54.522	-47.135	39.326	34.086
-4.7052	-50.508	-47.135	39.465	34.086
-4.7047	-50.336	-47.135	39.58	34.086
-4.7042	-49.861	-47.135	39.588	34.086
-4.7037	-49.032	-47.135	39.588	34.086
-4.7032	-47.98	-47.385	39.588	34.086
-4.7027	-47.98	-47.931	39.588	34.086
-4.7022	-47.98	-48.261	39.588	33.996
-4.7017	-47.98	-48.467	39.588	33.886
-4.7012	-47.98	-49.548	39.588	33.758
-4.7007	-48.423	-51.066	39.588	33.613
-4.7002	-49.15	-52.332	39.571	33.452
-4.6997	-49.781	-52.979	39.456	33.274
-4.6992	-50.208	-54.016	39.319	33.08
-4.6987	-50.488	-54.289	39.16	32.871
-4.6982	-50.703	-54.289	38.98	32.648
-4.6977	-52.213	-54.289	38.779	32.41
-4.6972	-53.438	-54.441	38.559	32.16
-4.6967	-53.964	-54.692	38.318	31.897
-4.6962	-54.004	-54.871	38.058	31.622
-4.6957	-54.035	-54.993	37.78	31.336
-4.6952	-54.071	-55.199	37.485	31.04
-4.6947	-54.103	-55.371	37.172	30.735
-4.6942	-54.138	-55.446	36.842	30.421
-4.6937	-54.202	-55.458	36.497	30.1
-4.6932	-54.582	-55.458	36.138	29.771
-4.6927	-55.073	-55.458	35.764	29.437
-4.6922	-55.496	-55.458	35.377	29.098
-4.6917	-55.691	-55.458	34.977	28.754
-4.6912	-55.85	-55.517	34.567	28.407
-4.6907	-56.367	-56.04	34.145	28.059
-4.6902	-57.103	-56.796	33.714	27.711
-4.6897	-57.659	-57.372	33.274	27.363
-4.6892	-57.839	-57.693	32.827	27.014
-4.6887	-58.115	-57.693	32.372	26.666
-4.6882	-58.183	-57.693	31.912	26.321
-4.6877	-58.219	-57.802	31.446	25.979
-4.6872	-58.26	-57.84	30.977	25.641
-4.6867	-58.31	-57.884	30.505	25.309
-4.6862	-58.364	-57.916	30.03	24.982
-4.6857	-58.411	-57.953	29.554	24.663
-4.6852	-58.454	-57.985	29.078	24.352
-4.6847	-58.489	-58.017	28.603	24.049
-4.6842	-58.522	-58.093	28.129	23.756
-4.6837	-58.553	-58.226	27.657	23.474
-4.6832	-58.96	-58.319	27.189	23.202
-4.6827	-59.382	-58.696	26.725	22.943
-4.6822	-59.503	-58.809	26.266	22.696
-4.6817	-59.533	-58.852	25.813	22.463
-4.6812	-59.56	-58.858	25.367	22.244
-4.6807	-59.56	-58.858	24.928	22.039
-4.6802	-59.56	-58.858	24.496	21.85
-4.6797	-59.57	-58.872	24.074	21.677
-4.6792	-59.641	-58.923	23.661	21.52
-4.6787	-59.699	-58.953	23.258	21.38
-4.6782	-59.722	-59.012	22.866	21.258
-4.6777	-59.75	-59.15	22.485	21.153
-4.6772	-59.895	-59.298	22.116	21.099
-4.6767	-59.951	-59.298	21.759	21.099
-4.6762	-59.875	-59.145	21.415	21.099
-4.6757	-59.744	-58.994	21.084	21.099
-4.6752	-59.718	-58.948	20.766	21.099
-4.6747	-59.689	-58.919	20.462	21.099
-4.6742	-59.671	-58.883	20.172	21.099
-4.6737	-59.645	-58.838	19.897	21.099
-4.6732	-59.585	-58.794	19.636	21.099
-4.6727	-59.588	-58.833	19.391	21.159
-4.6722	-59.725	-58.989	19.16	21.268
-4.6717	-59.744	-58.99	18.944	21.397
-4.6712	-59.744	-58.99	18.743	21.546
-4.6707	-59.72	-58.949	18.557	21.714
-4.6702	-59.588	-58.778	18.386	21.902
-4.6697	-59.45	-58.583	18.23	22.108
-4.6692	-59.278	-58.401	18.089	22.334
-4.6687	-59.16	-58.297	17.963	22.578
-4.6682	-58.948	-58.015	17.852	22.841
-4.6677	-58.718	-57.726	17.754	23.121
-4.6672	-58.519	-57.503	17.671	23.419
-4.6667	-58.376	-57.379	17.602	23.733
-4.6662	-58.298	-57.15	17.561	24.064
-4.6657	-58.28	-56.714	17.561	24.41
-4.6652	-58.28	-56.714	17.561	24.772
-4.6647	-58.243	-56.563	17.561	25.149
-4.6642	-58.176	-56.472	17.561	25.539
-4.6637	-58.046	-56.293	17.561	25.943
-4.6632	-57.986	-56.256	17.561	26.359
-4.6627	-57.986	-56.256	17.561	26.787
-4.6622	-57.986	-56.256	17.561	27.226
-4.6617	-57.986	-56.256	17.588	27.676
-4.6612	-58.045	-56.292	17.645	28.135
-4.6607	-58.08	-56.467	17.709	28.603
-4.6602	-58.123	-56.545	17.781	29.078
-4.6597	-58.178	-56.649	17.861	29.561
-4.6592	-58.243	-56.761	17.947	30.05
-4.6587	-58.304	-56.813	18.039	30.544
-4.6582	-58.431	-56.902	18.136	31.043
-4.6577	-58.533	-57.009	18.237	31.545
-4.6572	-58.935	-57.748	18.343	32.05
-4.6567	-59.656	-58.583	18.451	32.556
-4.6562	-60.321	-59.364	18.563	33.064
-4.6557	-60.921	-60.075	18.676	33.571
-4.6552	-61.463	-60.72	18.791	34.077
-4.6547	-61.541	-60.878	18.906	34.582
-4.6542	-61.541	-60.878	19.022	35.083
-4.6537	-61.541	-60.878	19.137	35.581
-4.6532	-61.541	-60.878	19.25	36.075
-4.6527	-61.541	-60.878	19.362	36.563
-4.6522	-61.541	-60.878	19.471	37.045
-4.6517	-61.541	-60.878	19.578	37.519
-4.6512	-61.541	-60.878	19.68	37.986
-4.6507	-61.448	-60.878	19.779	38.445
-4.6502	-60.429	-59.49	19.873	38.893
-4.6497	-60.218	-59.301	19.961	39.332
-4.6492	-59.867	-58.926	20.044	39.76
-4.6487	-59.028	-57.46	20.12	40.176
-4.6482	-58.208	-56.405	20.19	40.58
-4.6477	-57.221	-54.901	20.253	40.972
-4.6472	-56.371	-53.351	20.308	41.349
-4.6467	-55.238	-51.805	20.355	41.713
-4.6462	-54.606	-50.084	20.369	42.062
-4.6457	-54.546	-48.768	20.369	42.397
-4.6452	-54.478	-48.768	20.369	42.715
-4.6447	-54.451	-48.768	20.369	43.018
-4.6442	-54.153	-48.768	20.369	43.304
-4.6437	-53.076	-48.676	20.369	43.573
-4.6432	-52.153	-47.82	20.369	43.826
-4.6427	-51.263	-46.662	20.369	44.061
-4.6422	-51.263	-45.715	20.369	44.278
-4.6417	-51.263	-45.715	20.326	44.478
-4.6412	-51.263	-45.715	20.268	44.66
-4.6407	-51.263	-46.662	20.199	44.823
-4.6402	-51.263	-47.562	20.12	44.968
-4.6397	-51.263	-48.357	20.031	45.095
-4.6392	-51.263	-48.898	19.931	45.203
-4.6387	-51.263	-49.246	19.821	45.293
-4.6382	-51.91	-49.684	19.7	45.301
-4.6377	-52.624	-50.033	19.569	45.301
-4.6372	-53.135	-50.092	19.428	45.301
-4.6367	-53.272	-50.26	19.277	45.301
-4.6362	-53.521	-51.292	19.116	45.301
-4.6357	-54.291	-52.729	18.946	45.301
-4.6352	-55.28	-54.315	18.766	45.301
-4.6347	-56.257	-55.75	18.577	45.301
-4.6342	-57.053	-56.817	18.38	45.289
-4.6337	-57.486	-57.019	18.173	45.201
-4.6332	-57.61	-57.218	17.958	45.097
-4.6327	-57.771	-57.431	17.736	44.977
-4.6322	-57.951	-57.56	17.505	44.841
-4.6317	-58.094	-57.86	17.267	44.689
-4.6312	-58.237	-58.149	17.023	44.522
-4.6307	-58.398	-58.4	16.771	44.34
-4.6302	-58.527	-58.567	16.514	44.144
-4.6297	-58.674	-58.621	16.25	43.934
-4.6292	-58.804	-58.668	15.981	43.711
-4.6287	-59.055	-58.758	15.707	43.474
-4.6282	-59.165	-58.847	15.428	43.224
-4.6277	-59.26	-58.948	15.145	42.96
-4.6272	-59.26	-58.948	14.858	42.684
-4.6267	-59.26	-58.948	14.568	42.399
-4.6262	-59.26	-58.948	14.274	42.104
-4.6257	-59.26	-58.948	13.978	41.798
-4.6252	-59.26	-58.948	13.673	41.481
-4.6247	-59.26	-58.948	13.373	41.156
-4.6242	-59.226	-58.878	13.072	40.82
-4.6237	-59.094	-58.691	12.769	40.476
-4.6232	-58.93	-58.615	12.466	40.12
-4.6227	-58.276	-57.534	12.163	39.758
-4.6222	-58.035	-57.09	11.859	39.39
-4.6217	-57.925	-57.041	11.556	39.015
-4.6212	-57.856	-56.987	11.254	38.633
-4.6207	-57.827	-56.925	10.953	38.245
-4.6202	-57.795	-56.84	10.647	37.85
-4.6197	-57.719	-56.781	10.349	37.45
-4.6192	-57.666	-56.644	10.054	37.044
-4.6187	-57.59	-56.518	9.7609	36.633
-4.6182	-57.528	-56.356	9.4705	36.218
-4.6177	-57.434	-56.191	9.183	35.798
-4.6172	-57.398	-56.07	8.8987	35.374
-4.6167	-56.379	-54.604	8.6178	34.946
-4.6162	-56.258	-54.255	8.3405	34.514
-4.6157	-56.104	-54.187	8.0671	34.079
-4.6152	-56.028	-54.079	7.7978	33.641
-4.6147	-55.997	-53.996	7.5328	33.201
-4.6142	-55.963	-53.927	7.2722	32.758
-4.6137	-55.925	-53.888	7.0163	32.312
-4.6132	-55.766	-53.837	6.7651	31.865
-4.6127	-55.696	-53.641	6.5189	31.415
-4.6122	-55.679	-53.513	6.2777	30.964
-4.6117	-55.679	-52.808	6.0416	30.512
-4.6112	-55.679	-52.518	5.8108	30.058
-4.6107	-55.679	-52.375	5.5853	29.603
-4.6102	-55.679	-52.375	5.3652	29.148
-4.6097	-55.679	-52.375	5.1506	28.691
-4.6092	-55.679	-52.375	4.9414	28.235
-4.6087	-55.693	-52.375	4.7378	27.777
-4.6082	-55.766	-52.375	4.5398	27.32
-4.6077	-56.379	-52.375	4.3473	26.863
-4.6072	-57.176	-52.375	4.1603	26.405
-4.6067	-58.044	-52.375	3.9789	25.948
-4.6062	-58.86	-53.22	3.8031	25.492
-4.6057	-59.038	-54.723	3.6327	25.036
-4.6052	-59.16	-55.422	3.4678	24.581
-4.6047	-59.293	-56.081	3.3084	24.126
-4.6042	-59.378	-56.212	3.1542	23.673
-4.6037	-59.43	-56.487	3.0054	23.221
-4.6032	-59.467	-57.239	2.8618	22.77
-4.6027	-59.727	-58.058	2.7234	22.321
-4.6022	-59.78	-58.162	2.5901	21.874
-4.6017	-59.827	-58.801	2.4617	21.428
-4.6012	-59.881	-59.131	2.3383	20.984
-4.6007	-59.919	-59.203	2.2196	20.542
-4.6002	-60.026	-59.303	2.1056	20.103
-4.5997	-60.139	-59.478	1.9963	19.666
-4.5992	-60.259	-59.706	1.8914	19.231
-4.5987	-60.303	-59.879	1.791	18.799
-4.5982	-60.353	-60.051	1.6948	18.37
-4.5977	-60.43	-60.145	1.6028	17.944
-4.5972	-60.517	-60.189	1.5148	17.522
-4.5967	-60.563	-60.266	1.4308	17.102
-4.5962	-60.563	-60.339	1.3505	16.686
-4.5957	-60.563	-60.392	1.274	16.274
-4.5952	-60.601	-60.491	1.2011	15.865
-4.5947	-60.683	-60.683	1.1316	15.46
-4.5942	-61.066	-61.153	1.0655	15.06
-4.5937	-61.512	-61.531	1.0026	14.663
-4.5932	-61.512	-61.619	0.94285	14.271
-4.5927	-61.512	-61.619	0.8861	13.884
-4.5922	-61.512	-61.619	0.83225	13.501
-4.5917	-61.512	-61.619	0.78118	13.123
-4.5912	-61.512	-61.619	0.73278	12.749
-4.5907	-61.512	-61.619	0.68696	12.381
-4.5902	-61.522	-61.67	0.64359	12.018
-4.5897	-61.576	-61.763	0.60259	11.66
-4.5892	-61.595	-61.801	0.56385	11.308
-4.5887	-61.595	-61.801	0.52727	10.961
-4.5882	-61.595	-61.801	0.49275	10.62
-4.5877	-61.595	-61.801	0.46021	10.284
-4.5872	-61.595	-61.801	0.42954	9.9547
-4.5867	-61.595	-61.801	0.40067	9.6309
-4.5862	-61.6	-61.876	0.37351	9.313
-4.5857	-61.616	-61.961	0.34797	9.0012
-4.5852	-61.814	-62.036	0.32397	8.6955
-4.5847	-61.997	-62.197	0.30144	8.3959
-4.5842	-62.21	-62.571	0.28031	8.1026
-4.5837	-62.21	-62.571	0.26049	7.8155
-4.5832	-62.266	-62.646	0.24192	7.5348
-4.5827	-62.417	-62.814	0.22453	7.2604
-4.5822	-62.439	-62.868	0.20827	6.9923
-4.5817	-62.439	-62.868	0.19306	6.7307
-4.5812	-62.439	-62.868	0.17885	6.4754
-4.5807	-62.439	-62.868	0.16558	6.2264
-4.5802	-62.439	-62.868	0.1532	5.9839
-4.5797	-62.429	-62.868	0.14166	5.7478
-4.5792	-62.239	-62.705	0.13091	5.518
-4.5787	-62.058	-62.489	0.12089	5.2945
-4.5782	-62.058	-62.456	0.11157	5.0773
-4.5777	-62.058	-62.456	0.10291	4.8663
-4.5772	-62.058	-62.456	0.094861	4.6616
-4.5767	-62.058	-62.456	0.087386	4.463
-4.5762	-62.058	-62.456	0.08045	4.2705
-4.5757	-62.058	-62.456	0.074018	4.084
-4.5752	-62.171	-62.541	0.068057	3.9035
-4.5747	-62.336	-62.727	0.062538	3.7289
-4.5742	-62.462	-62.862	0.05743	3.5601
-4.5737	-62.585	-62.927	0.052707	3.397
-4.5732	-62.906	-63.122	0.048341	3.2396
-4.5727	-62.928	-63.211	0.04431	3.0877
-4.5722	-62.989	-63.297	0.040589	2.9412
-4.5717	-63.043	-63.401	0.037158	2.8001
-4.5712	-63.073	-63.479	0.033995	2.6642
-4.5707	-63.164	-63.565	0.031083	2.5334
-4.5702	-63.473	-63.791	0.028402	2.4077
-4.5697	-63.788	-64.135	0.025936	2.2869
-4.5692	-64.087	-64.451	0.023669	2.1709
-4.5687	-64.362	-64.736	0.021587	2.0596
-4.5682	-64.547	-64.992	0.019676	1.9528
-4.5677	-64.547	-65.001	0.017922	1.8505
-4.5672	-64.547	-65.001	0.016315	1.7525
-4.5667	-64.547	-65.001	0.014843	1.6588
-4.5662	-64.547	-65.001	0.013495	1.5691
-4.5657	-64.547	-65.001	0.012262	1.4834
-4.5652	-64.574	-65.025	0.011134	1.3987
-4.5647	-64.643	-65.098	0.010104	1.3182
-4.5642	-64.657	-65.109	0.0091638	1.2442
-4.5637	-64.698	-65.154	0.0083056	1.1736
-4.5632	-64.71	-65.189	0.0075231	1.1064
-4.5627	-64.659	-65.123	0.00681	1.0424
-4.5622	-64.65	-65.101	0	0.98152
-4.5617	-64.581	-65.042	0	0.92363
-4.5612	-64.502	-64.95	0	0.86862
-4.5607	-64.45	-64.922	0	0.8164
-4.5602	-64.439	-64.896	0	0.76685
-4.5597	-64.439	-64.86	0	0.71895
-4.5592	-64.445	-64.875	0	0.67267
-4.5587	-64.475	-64.914	0	0.62796
-4.5582	-64.536	-64.941	0	0.58771
-4.5577	-64.564	-64.949	0	0.55055
-4.5572	-64.564	-64.949	0	0.51542
-4.5567	-64.564	-64.936	0	0.48223
-4.5562	-64.503	-64.829	0	0.45089
-4.5557	-64.423	-64.722	0	0.42133
-4.5552	-64.344	-64.633	0	0.39346
-4.5547	-64.282	-64.574	0	0.36633
-4.5542	-64.191	-64.501	0	0.3417
-4.5537	-64.109	-64.418	0	0.31853
-4.5532	-64.058	-64.358	0	0.29674
-4.5527	-63.818	-64.071	0	0.27627
-4.5522	-63.226	-63.388	0	0.25705
-4.5517	-63.205	-63.369	0	0.23902
-4.5512	-63.205	-63.369	0	0.22212
-4.5507	-63.205	-63.369	0	0.20628
-4.5502	-63.205	-63.369	0	0.19145
-4.5497	-63.205	-63.369	0	0.17758
-4.5492	-63.205	-63.369	0	0.16461
-4.5487	-63.205	-63.369	0	0.15249
-4.5482	-63.205	-63.369	0	0.14117
-4.5477	-63.236	-63.404	0	0.13062
-4.5472	-63.423	-63.698	0	0.12077
-4.5467	-63.643	-63.966	0	0.1116
-4.5462	-63.859	-64.205	0	0.10306
-4.5457	-64.06	-64.419	0	0.09512
-4.5452	-64.246	-64.613	0	0.087732
-4.5447	-64.416	-64.791	0	0.080868
-4.5442	-64.572	-64.952	0	0.074495
-4.5437	-64.715	-65.1	0	0.06858
-4.5432	-64.845	-65.235	0	0.063096
-4.5427	-64.965	-65.357	0	0.058015
-4.5422	-65.046	-65.469	0	0.053309
-4.5417	-65.071	-65.561	0	0.048954
-4.5412	-65.107	-65.573	0	0.044927
-4.5407	-65.145	-65.592	0	0.041206
-4.5402	-65.18	-65.645	0	0.037769
-4.5397	-65.206	-65.692	0	0.034597
-4.5392	-65.213	-65.692	0	0.031672
-4.5387	-65.213	-65.692	0	0.028976
-4.5382	-65.218	-65.692	0	0.026493
-4.5377	-65.218	-65.692	0	0.024207
-4.5372	-65.218	-65.692	0	0.022105
-4.5367	-65.218	-65.692	0	0.020173
-4.5362	-65.23	-65.694	0	0.018398
-4.5357	-65.25	-65.726	0	0.016769
-4.5352	-65.242	-65.714	0	0.015275
-4.5347	-65.224	-65.667	0	0.013905
-4.5342	-65.221	-65.644	0	0.01265
-4.5337	-65.221	-65.644	0	0.011501
-4.5332	-65.221	-65.644	0	0.01045
-4.5327	-65.221	-65.644	0	0.0094891
-4.5322	-65.217	-65.618	0	0.0086111
-4.5317	-65.207	-65.592	0	0.0078095
-4.5312	-65.189	-65.581	0	0.0070781
-4.5307	-65.173	-65.577	0	0.0055177
-4.5302	-65.173	-65.579	0	0.003126
-4.5297	-65.175	-65.591	0	0.00098262
-4.5292	-65.188	-65.607	0	0
-4.5287	-65.211	-65.631	0	0
-4.5282	-65.234	-65.654	0	0
-4.5277	-65.251	-65.668	0	0
-4.5272	-65.252	-65.668	0	0
-4.5267	-65.261	-65.674	0	0
-4.5262	-65.296	-65.691	0	0
-4.5257	-65.332	-65.709	0	0
-4.5252	-65.359	-65.728	0	0
-4.5247	-65.362	-65.728	0	0
-4.5242	-65.372	-65.732	0	0
-4.5237	-65.397	-65.768	0	0
-4.5232	-65.423	-65.804	0	0
-4.5227	-65.459	-65.837	0	0
-4.5222	-65.482	-65.865	0	0
-4.5217	-65.482	-65.865	0	0
-4.5212	-65.482	-65.865	0	0
-4.5207	-65.482	-65.865	0	0
-4.5202	-65.482	-65.865	0	0
-4.5197	-65.482	-65.865	0	0
-4.5192	-65.482	-65.865	0	0
-4.5187	-65.482	-65.865	0	0
-4.5182	-65.482	-65.865	0	0
-4.5177	-65.345	-65.82	0	0
-4.5172	-65.236	-65.691	0	0
-4.5167	-65.096	-65.382	0	0
-4.5162	-64.625	-64.908	0	0
-4.5157	-63.923	-64.197	0	0
-4.5152	-62.992	-63.426	0	0
-4.5147	-62.531	-62.921	0	0
-4.5142	-62.531	-62.921	0	0
-4.5137	-62.531	-62.921	0	0
-4.5132	-62.531	-62.921	0	0
-4.5127	-62.531	-62.921	0	0
-4.5122	-62.531	-62.921	0	0
-4.5117	-62.531	-62.921	0	0
-4.5112	-62.531	-62.921	0	0
-4.5107	-62.531	-62.921	0	0
-4.5102	-62.531	-62.986	0	0
-4.5097	-62.548	-62.997	0	0
-4.5092	-62.586	-63.011	0	0
-4.5087	-62.672	-63.034	0	0
-4.5082	-62.755	-63.048	0	0
-4.5077	-62.786	-63.101	0	0
-4.5072	-62.856	-63.196	0	0
-4.5067	-62.919	-63.301	0	0
-4.5062	-62.962	-63.342	0	0
-4.5057	-63.016	-63.4	0	0
-4.5052	-63.075	-63.464	0	0
-4.5047	-63.135	-63.53	0	0
-4.5042	-63.154	-63.598	0	0
-4.5037	-63.154	-63.637	0	0
-4.5032	-63.154	-63.637	0	0
-4.5027	-63.163	-63.647	0	0
-4.5022	-63.206	-63.699	0	0
-4.5017	-63.216	-63.782	0	0
-4.5012	-63.37	-63.864	0	0
-4.5007	-63.436	-63.883	0	0
-4.5002	-63.533	-63.91	0	0
-4.4997	-63.62	-64.027	0	0
-4.4992	-63.809	-64.236	0	0
-4.4987	-63.909	-64.348	0	0
-4.4982	-63.909	-64.348	0	0
-4.4977	-63.909	-64.348	0	0
-4.4972	-63.918	-64.362	0	0
-4.4967	-63.947	-64.404	0	0
-4.4962	-63.977	-64.418	0	0
-4.4957	-64.026	-64.466	0	0
-4.4952	-64.077	-64.512	0	0
-4.4947	-64.103	-64.529	0	0
-4.4942	-64.136	-64.559	0	0
-4.4937	-64.157	-64.598	0	0
-4.4932	-64.157	-64.598	0	0
-4.4927	-64.122	-64.541	0	0
-4.4922	-64.086	-64.519	0	0
-4.4917	-64.047	-64.482	0	0
-4.4912	-63.984	-64.425	0	0
-4.4907	-63.953	-64.394	0	0
-4.4902	-63.916	-64.367	0	0
-4.4897	-63.916	-64.367	0	0
-4.4892	-63.916	-64.367	0	0
-4.4887	-63.928	-64.375	0	0
-4.4882	-63.929	-64.394	0	0
-4.4877	-63.929	-64.394	0	0
-4.4872	-63.929	-64.394	0	0
-4.4867	-63.929	-64.394	0	0
-4.4862	-63.929	-64.394	0	0
-4.4857	-63.929	-64.394	0	0
-4.4852	-63.929	-64.394	0	0
-4.4847	-63.95	-64.415	0	0
-4.4842	-64.032	-64.493	0	0
-4.4837	-64.149	-64.564	0	0
-4.4832	-64.179	-64.606	0	0
-4.4827	-64.267	-64.71	0	0
-4.4822	-64.422	-64.852	0	0
-4.4817	-64.48	-64.981	0	0
-4.4812	-64.54	-65.097	0	0
-4.4807	-64.608	-65.138	0	0
-4.4802	-64.66	-65.149	0	0
-4.4797	-64.678	-65.176	0	0
-4.4792	-64.707	-65.209	0	0
-4.4787	-64.735	-65.22	0	0
-4.4782	-64.765	-65.237	0	0
-4.4777	-64.811	-65.254	0	0
-4.4772	-64.851	-65.27	0	0
-4.4767	-64.886	-65.344	0	0
-4.4762	-64.974	-65.425	0	0
-4.4757	-65.038	-65.468	0	0
-4.4752	-65.053	-65.483	0	0
-4.4747	-65.077	-65.506	0	0
-4.4742	-65.102	-65.53	0	0
-4.4737	-65.102	-65.535	0	0
-4.4732	-65.102	-65.535	0	0
-4.4727	-65.102	-65.535	0	0
-4.4722	-65.102	-65.543	0	0
-4.4717	-65.124	-65.559	0	0
-4.4712	-65.158	-65.586	0	0
-4.4707	-65.191	-65.614	0	0
-4.4702	-65.223	-65.639	0	0
-4.4697	-65.254	-65.664	0	0
-4.4692	-65.258	-65.668	0	0
-4.4687	-65.258	-65.668	0	0
-4.4682	-65.223	-65.663	0	0
-4.4677	-65.187	-65.621	0	0
-4.4672	-65.187	-65.618	0	0
-4.4667	-65.187	-65.618	0	0
-4.4662	-65.187	-65.618	0	0
-4.4657	-65.187	-65.618	0	0
-4.4652	-65.208	-65.626	0	0
-4.4647	-65.208	-65.626	0	0
-4.4642	-65.208	-65.626	0	0
-4.4637	-65.208	-65.626	0	0
-4.4632	-65.208	-65.626	0	0
-4.4627	-65.206	-65.6	0	0
-4.4622	-65.133	-65.539	0	0
-4.4617	-65.066	-65.483	0	0
-4.4612	-65.008	-65.439	0	0
-4.4607	-64.981	-65.417	0	0
-4.4602	-64.832	-65.122	0	0
-4.4597	-64.506	-64.771	0	0
-4.4592	-64.506	-64.771	0	0
-4.4587	-64.506	-64.771	0	0
-4.4582	-64.506	-64.771	0	0
-4.4577	-64.506	-64.771	0	0
-4.4572	-64.506	-64.771	0	0
-4.4567	-64.506	-64.771	0	0
-4.4562	-64.506	-64.771	0	0
-4.4557	-64.506	-64.771	0	0
-4.4552	-64.614	-64.891	0	0
-4.4547	-64.664	-64.916	0	0
-4.4542	-64.699	-64.961	0	0
-4.4537	-64.741	-64.988	0	0
-4.4532	-64.787	-64.988	0	0
-4.4527	-64.81	-65.011	0	0
-4.4522	-64.848	-65.038	0	0
-4.4517	-64.872	-65.052	0	0
-4.4512	-64.872	-65.052	0	0
-4.4507	-64.872	-65.052	0	0
-4.4502	-64.872	-65.052	0	0
-4.4497	-64.872	-65.052	0	0
-4.4492	-64.872	-65.052	0	0
-4.4487	-64.872	-65.03	0	0
-4.4482	-64.837	-64.987	0	0
-4.4477	-64.832	-64.987	0	0
-4.4472	-64.832	-64.987	0	0
-4.4467	-64.832	-64.987	0	0
-4.4462	-64.825	-64.978	0	0
-4.4457	-64.801	-64.96	0	0
-4.4452	-64.79	-64.943	0	0
-4.4447	-64.78	-64.939	0	0
-4.4442	-64.77	-64.932	0	0
-4.4437	-64.741	-64.925	0	0
-4.4432	-64.737	-64.925	0	0
-4.4427	-64.745	-64.93	0	0
-4.4422	-64.77	-64.938	0	0
-4.4417	-64.781	-64.958	0	0
-4.4412	-64.784	-64.982	0	0
-4.4407	-64.791	-65.01	0	0
-4.4402	-64.807	-65.043	0	0
-4.4397	-64.82	-65.058	0	0
-4.4392	-64.817	-65.079	0	0
-4.4387	-64.817	-65.093	0	0
-4.4382	-64.817	-65.093	0	0
-4.4377	-64.817	-65.109	0	0
-4.4372	-64.835	-65.127	0	0
-4.4367	-64.864	-65.14	0	0
-4.4362	-64.891	-65.156	0	0
-4.4357	-64.917	-65.172	0	0
-4.4352	-64.95	-65.201	0	0
-4.4347	-64.988	-65.234	0	0
-4.4342	-64.997	-65.249	0	0
-4.4337	-65.012	-65.252	0	0
-4.4332	-65.02	-65.247	0	0
-4.4327	-65.044	-65.247	0	0
-4.4322	-65.044	-65.247	0	0
-4.4317	-65.044	-65.247	0	0
-4.4312	-65.054	-65.25	0	0
-4.4307	-65.065	-65.261	0	0
-4.4302	-65.065	-65.261	0	0
-4.4297	-65.065	-65.256	0	0
-4.4292	-65.064	-65.243	0	0
-4.4287	-65.038	-65.207	0	0
-4.4282	-65.017	-65.201	0	0
-4.4277	-65.017	-65.185	0	0
-4.4272	-65.012	-65.185	0	0
-4.4267	-64.985	-65.171	0	0
-4.4262	-64.97	-65.153	0	0
-4.4257	-64.957	-65.14	0	0
-4.4252	-64.942	-65.119	0	0
-4.4247	-64.918	-65.092	0	0
-4.4242	-64.893	-65.078	0	0
-4.4237	-64.876	-65.078	0	0
-4.4232	-64.876	-65.086	0	0
-4.4227	-64.876	-65.086	0	0
-4.4222	-64.876	-65.086	0	0
-4.4217	-64.876	-65.086	0	0
-4.4212	-64.876	-65.088	0	0
-4.4207	-64.902	-65.108	0	0
-4.4202	-64.936	-65.127	0	0
-4.4197	-64.946	-65.148	0	0
-4.4192	-64.963	-65.172	0	0
-4.4187	-64.967	-65.172	0	0
-4.4182	-64.974	-65.182	0	0
-4.4177	-65	-65.214	0	0
-4.4172	-65.024	-65.246	0	0
-4.4167	-65.073	-65.295	0	0
-4.4162	-65.136	-65.362	0	0
-4.4157	-65.206	-65.434	0	0
-4.4152	-65.278	-65.508	0	0
-4.4147	-65.326	-65.552	0	0
-4.4142	-65.326	-65.574	0	0
-4.4137	-65.351	-65.602	0	0
-4.4132	-65.379	-65.616	0	0
-4.4127	-65.393	-65.627	0	0
-4.4122	-65.405	-65.64	0	0
-4.4117	-65.41	-65.65	0	0
-4.4112	-65.414	-65.655	0	0
-4.4107	-65.419	-65.657	0	0
-4.4102	-65.419	-65.657	0	0
-4.4097	-65.416	-65.656	0	0
-4.4092	-65.407	-65.647	0	0
-4.4087	-65.399	-65.64	0	0
-4.4082	-65.394	-65.624	0	0
-4.4077	-65.382	-65.617	0	0
-4.4072	-65.369	-65.617	0	0
-4.4067	-65.355	-65.614	0	0
-4.4062	-65.343	-65.529	0	0
-4.4057	-65.343	-65.499	0	0
-4.4052	-65.341	-65.499	0	0
-4.4047	-65.337	-65.499	0	0
-4.4042	-65.337	-65.499	0	0
-4.4037	-65.325	-65.495	0	0
-4.4032	-65.311	-65.482	0	0
-4.4027	-65.297	-65.471	0	0
-4.4022	-65.282	-65.461	0	0
-4.4017	-65.271	-65.444	0	0
-4.4012	-65.265	-65.423	0	0
-4.4007	-65.232	-65.409	0	0
-4.4002	-65.199	-65.408	0	0
-4.3997	-65.174	-65.408	0	0
-4.3992	-65.146	-65.251	0	0
-4.3987	-65.077	-65.209	0	0
-4.3982	-65.036	-65.169	0	0
-4.3977	-65.029	-65.169	0	0
-4.3972	-65.029	-65.169	0	0
-4.3967	-65.029	-65.169	0	0
-4.3962	-65.014	-65.151	0	0
-4.3957	-65.014	-65.15	0	0
-4.3952	-65.014	-65.15	0	0
-4.3947	-65.014	-65.152	0	0
-4.3942	-65.023	-65.17	0	0
-4.3937	-65.037	-65.19	0	0
-4.3932	-65.053	-65.209	0	0
-4.3927	-65.069	-65.231	0	0
-4.3922	-65.072	-65.243	0	0
-4.3917	-65.07	-65.241	0	0
-4.3912	-65.07	-65.241	0	0
-4.3907	-65.075	-65.25	0	0
-4.3902	-65.093	-65.271	0	0
-4.3897	-65.11	-65.292	0	0
-4.3892	-65.123	-65.31	0	0
-4.3887	-65.137	-65.324	0	0
-4.3882	-65.151	-65.339	0	0
-4.3877	-65.161	-65.367	0	0
-4.3872	-65.177	-65.388	0	0
-4.3867	-65.195	-65.4	0	0
-4.3862	-65.213	-65.417	0	0
-4.3857	-65.233	-65.434	0	0
-4.3852	-65.252	-65.453	0	0
-4.3847	-65.262	-65.468	0	0
-4.3842	-65.272	-65.454	0	0
-4.3837	-65.282	-65.454	0	0
-4.3832	-65.282	-65.454	0	0
-4.3827	-65.282	-65.454	0	0
-4.3822	-65.282	-65.454	0	0
-4.3817	-65.282	-65.454	0	0
-4.3812	-65.282	-65.454	0	0
-4.3807	-65.241	-65.418	0	0
-4.3802	-65.232	-65.401	0	0
-4.3797	-65.232	-65.398	0	0
-4.3792	-64.923	-65.074	0	0
-4.3787	-64.848	-65.006	0	0
-4.3782	-64.817	-64.972	0	0
-4.3777	-64.813	-64.972	0	0
-4.3772	-64.813	-64.972	0	0
-4.3767	-64.813	-64.972	0	0
-4.3762	-64.813	-64.972	0	0
-4.3757	-64.813	-64.972	0	0
-4.3752	-64.813	-64.964	0	0
-4.3747	-64.813	-64.946	0	0
-4.3742	-64.825	-64.954	0	0
-4.3737	-64.833	-64.972	0	0
-4.3732	-64.846	-64.973	0	0
-4.3727	-64.854	-64.964	0	0
-4.3722	-64.86	-64.972	0	0
-4.3717	-64.86	-64.972	0	0
-4.3712	-64.86	-64.972	0	0
-4.3707	-64.86	-64.972	0	0
-4.3702	-64.86	-64.972	0	0
-4.3697	-64.86	-64.972	0	0
-4.3692	-64.86	-64.96	0	0
-4.3687	-64.846	-64.942	0	0
-4.3682	-64.826	-64.935	0	0
-4.3677	-64.783	-64.935	0	0
-4.3672	-64.783	-64.935	0	0
-4.3667	-64.767	-64.935	0	0
-4.3662	-64.767	-64.942	0	0
-4.3657	-64.767	-64.952	0	0
-4.3652	-64.767	-64.952	0	0
-4.3647	-64.767	-64.952	0	0
-4.3642	-64.767	-64.994	0	0
-4.3637	-64.767	-65.019	0	0
-4.3632	-64.782	-65.086	0	0
-4.3627	-64.81	-65.099	0	0
-4.3622	-64.843	-65.121	0	0
-4.3617	-64.875	-65.142	0	0
-4.3612	-64.928	-65.211	0	0
-4.3607	-65.019	-65.297	0	0
-4.3602	-65.107	-65.381	0	0
-4.3597	-65.143	-65.457	0	0
-4.3592	-65.167	-65.51	0	0
-4.3587	-65.197	-65.51	0	0
-4.3582	-65.228	-65.51	0	0
-4.3577	-65.228	-65.51	0	0
-4.3572	-65.228	-65.51	0	0
-4.3567	-65.228	-65.51	0	0
-4.3562	-65.228	-65.51	0	0
-4.3557	-65.228	-65.51	0	0
-4.3552	-65.228	-65.51	0	0
-4.3547	-65.192	-65.503	0	0
-4.3542	-65.152	-65.489	0	0
-4.3537	-65.118	-65.344	0	0
-4.3532	-64.972	-65.251	0	0
-4.3527	-64.972	-65.251	0	0
-4.3522	-64.972	-65.251	0	0
-4.3517	-64.972	-65.251	0	0
-4.3512	-64.972	-65.251	0	0
-4.3507	-64.972	-65.251	0	0
-4.3502	-64.972	-65.251	0	0
-4.3497	-64.972	-65.251	0	0
-4.3492	-64.972	-65.251	0	0
-4.3487	-65.04	-65.312	0	0
-4.3482	-65.068	-65.314	0	0
-4.3477	-65.088	-65.34	0	0
-4.3472	-65.114	-65.369	0	0
-4.3467	-65.124	-65.378	0	0
-4.3462	-65.124	-65.378	0	0
-4.3457	-65.124	-65.378	0	0
-4.3452	-65.128	-65.378	0	0
-4.3447	-65.146	-65.384	0	0
-4.3442	-65.163	-65.401	0	0
-4.3437	-65.179	-65.417	0	0
-4.3432	-65.189	-65.418	0	0
-4.3427	-65.189	-65.418	0	0
-4.3422	-65.171	-65.4	0	0
-4.3417	-65.152	-65.379	0	0
-4.3412	-65.131	-65.357	0	0
-4.3407	-65.111	-65.336	0	0
-4.3402	-65.095	-65.315	0	0
-4.3397	-65.111	-65.322	0	0
-4.3392	-65.127	-65.334	0	0
-4.3387	-65.129	-65.334	0	0
-4.3382	-65.132	-65.336	0	0
-4.3377	-65.154	-65.358	0	0
-4.3372	-65.175	-65.38	0	0
-4.3367	-65.196	-65.4	0	0
-4.3362	-65.215	-65.42	0	0
-4.3357	-65.233	-65.437	0	0
-4.3352	-65.251	-65.453	0	0
-4.3347	-65.253	-65.453	0	0
-4.3342	-65.253	-65.453	0	0
-4.3337	-65.247	-65.446	0	0
-4.3332	-65.247	-65.446	0	0
-4.3327	-65.254	-65.454	0	0
-4.3322	-65.254	-65.454	0	0
-4.3317	-65.254	-65.454	0	0
-4.3312	-65.254	-65.454	0	0
-4.3307	-65.268	-65.457	0	0
-4.3302	-65.288	-65.477	0	0
-4.3297	-65.307	-65.495	0	0
-4.3292	-65.326	-65.513	0	0
-4.3287	-65.344	-65.53	0	0
-4.3282	-65.36	-65.548	0	0
-4.3277	-65.377	-65.558	0	0
-4.3272	-65.38	-65.558	0	0
-4.3267	-65.375	-65.558	0	0
-4.3262	-65.335	-65.523	0	0
-4.3257	-65.295	-65.485	0	0
-4.3252	-65.276	-65.463	0	0
-4.3247	-65.276	-65.463	0	0
-4.3242	-65.276	-65.463	0	0
-4.3237	-65.276	-65.463	0	0
-4.3232	-65.276	-65.463	0	0
-4.3227	-65.276	-65.463	0	0
-4.3222	-65.253	-65.463	0	0
-4.3217	-65.156	-65.403	0	0
-4.3212	-65.034	-65.351	0	0
-4.3207	-65.006	-65.26	0	0
-4.3202	-65.006	-65.244	0	0
-4.3197	-65.006	-65.244	0	0
-4.3192	-65.006	-65.244	0	0
-4.3187	-65.006	-65.244	0	0
-4.3182	-65.006	-65.244	0	0
-4.3177	-65.006	-65.221	0	0
-4.3172	-65.006	-65.196	0	0
-4.3167	-65.019	-65.172	0	0
-4.3162	-65.029	-65.178	0	0
-4.3157	-65.043	-65.197	0	0
-4.3152	-65.062	-65.218	0	0
-4.3147	-65.091	-65.238	0	0
-4.3142	-65.12	-65.258	0	0
-4.3137	-65.149	-65.276	0	0
-4.3132	-65.177	-65.308	0	0
-4.3127	-65.203	-65.338	0	0
-4.3122	-65.229	-65.366	0	0
-4.3117	-65.252	-65.392	0	0
-4.3112	-65.275	-65.416	0	0
-4.3107	-65.296	-65.438	0	0
-4.3102	-65.315	-65.453	0	0
-4.3097	-65.327	-65.453	0	0
-4.3092	-65.352	-65.479	0	0
-4.3087	-65.365	-65.49	0	0
-4.3082	-65.365	-65.49	0	0
-4.3077	-65.365	-65.49	0	0
-4.3072	-65.365	-65.49	0	0
-4.3067	-65.365	-65.49	0	0
-4.3062	-65.365	-65.49	0	0
-4.3057	-65.365	-65.49	0	0
-4.3052	-65.365	-65.49	0	0
-4.3047	-65.365	-65.49	0	0
-4.3042	-65.192	-65.299	0	0
-4.3037	-64.916	-65.075	0	0
-4.3032	-64.773	-64.953	0	0
-4.3027	-64.658	-64.876	0	0
-4.3022	-64.623	-64.811	0	0
-4.3017	-64.594	-64.787	0	0
-4.3012	-64.575	-64.767	0	0
-4.3007	-64.56	-64.753	0	0
-4.3002	-64.548	-64.736	0	0
-4.2997	-64.523	-64.723	0	0
-4.2992	-64.498	-64.708	0	0
-4.2987	-64.475	-64.682	0	0
-4.2982	-64.456	-64.652	0	0
-4.2977	-64.441	-64.625	0	0
-4.2972	-64.439	-64.608	0	0
-4.2967	-64.439	-64.608	0	0
-4.2962	-64.44	-64.608	0	0
-4.2957	-64.463	-64.623	0	0
-4.2952	-64.485	-64.647	0	0
-4.2947	-64.505	-64.661	0	0
-4.2942	-64.505	-64.661	0	0
-4.2937	-64.505	-64.661	0	0
-4.2932	-64.533	-64.686	0	0
-4.2927	-64.568	-64.724	0	0
-4.2922	-64.625	-64.766	0	0
-4.2917	-64.71	-64.839	0	0
-4.2912	-64.787	-64.858	0	0
-4.2907	-64.805	-64.888	0	0
-4.2902	-64.826	-64.922	0	0
-4.2897	-64.834	-64.956	0	0
-4.2892	-64.84	-64.992	0	0
-4.2887	-64.863	-65.026	0	0
-4.2882	-64.872	-65.072	0	0
-4.2877	-64.872	-65.072	0	0
-4.2872	-64.872	-65.072	0	0
-4.2867	-64.872	-65.072	0	0
-4.2862	-64.871	-65.072	0	0
-4.2857	-64.842	-65.072	0	0
-4.2852	-64.842	-65.072	0	0
-4.2847	-64.835	-65.09	0	0
-4.2842	-64.835	-65.131	0	0
-4.2837	-64.835	-65.148	0	0
-4.2832	-64.835	-65.151	0	0
-4.2827	-64.835	-65.151	0	0
-4.2822	-64.835	-65.151	0	0
-4.2817	-64.835	-65.154	0	0
-4.2812	-64.851	-65.154	0	0
-4.2807	-64.909	-65.164	0	0
-4.2802	-64.961	-65.194	0	0
-4.2797	-65.004	-65.253	0	0
-4.2792	-65.015	-65.259	0	0
-4.2787	-65.015	-65.259	0	0
-4.2782	-65.015	-65.259	0	0
-4.2777	-65.015	-65.259	0	0
-4.2772	-65.015	-65.259	0	0
-4.2767	-65.015	-65.259	0	0
-4.2762	-65.015	-65.259	0	0
-4.2757	-65.015	-65.259	0	0
-4.2752	-65.01	-65.256	0	0
-4.2747	-64.999	-65.224	0	0
-4.2742	-64.989	-65.224	0	0
-4.2737	-64.989	-65.22	0	0
-4.2732	-64.974	-65.201	0	0
-4.2727	-64.968	-65.197	0	0
-4.2722	-64.968	-65.197	0	0
-4.2717	-64.968	-65.197	0	0
-4.2712	-64.968	-65.197	0	0
-4.2707	-64.968	-65.197	0	0
-4.2702	-64.972	-65.2	0	0
-4.2697	-64.986	-65.215	0	0
-4.2692	-64.998	-65.241	0	0
-4.2687	-65.027	-65.272	0	0
-4.2682	-65.06	-65.285	0	0
-4.2677	-65.078	-65.285	0	0
-4.2672	-65.09	-65.285	0	0
-4.2667	-65.112	-65.292	0	0
-4.2662	-65.126	-65.309	0	0
-4.2657	-65.136	-65.327	0	0
-4.2652	-65.149	-65.334	0	0
-4.2647	-65.163	-65.344	0	0
-4.2642	-65.178	-65.357	0	0
-4.2637	-65.193	-65.371	0	0
-4.2632	-65.208	-65.386	0	0
-4.2627	-65.222	-65.399	0	0
-4.2622	-65.23	-65.399	0	0
-4.2617	-65.23	-65.399	0	0
-4.2612	-65.264	-65.416	0	0
-4.2607	-65.274	-65.47	0	0
-4.2602	-65.292	-65.478	0	0
-4.2597	-65.312	-65.492	0	0
-4.2592	-65.332	-65.508	0	0
-4.2587	-65.354	-65.525	0	0
-4.2582	-65.373	-65.542	0	0
-4.2577	-65.391	-65.558	0	0
-4.2572	-65.408	-65.573	0	0
-4.2567	-65.423	-65.587	0	0
-4.2562	-65.439	-65.61	0	0
-4.2557	-65.461	-65.622	0	0
-4.2552	-65.479	-65.628	0	0
-4.2547	-65.481	-65.631	0	0
-4.2542	-65.481	-65.631	0	0
-4.2537	-65.481	-65.631	0	0
-4.2532	-65.481	-65.631	0	0
-4.2527	-65.481	-65.631	0	0
-4.2522	-65.481	-65.631	0	0
-4.2517	-65.481	-65.631	0	0
-4.2512	-65.481	-65.63	0	0
-4.2507	-65.48	-65.62	0	0
-4.2502	-65.421	-65.548	0	0
-4.2497	-65.393	-65.516	0	0
-4.2492	-65.366	-65.485	0	0
-4.2487	-65.349	-65.459	0	0
-4.2482	-65.302	-65.445	0	0
-4.2477	-65.262	-65.363	0	0
-4.2472	-65.21	-65.35	0	0
-4.2467	-65.178	-65.319	0	0
-4.2462	-65.141	-65.281	0	0
-4.2457	-65.1	-65.239	0	0
-4.2452	-65.057	-65.195	0	0
-4.2447	-65.01	-65.147	0	0
-4.2442	-64.962	-65.098	0	0
-4.2437	-64.92	-65.054	0	0
-4.2432	-64.893	-65.025	0	0
-4.2427	-64.848	-65.016	0	0
-4.2422	-64.833	-65.006	0	0
-4.2417	-64.699	-64.818	0	0
-4.2412	-64.697	-64.81	0	0
-4.2407	-64.697	-64.81	0	0
-4.2402	-64.697	-64.81	0	0
-4.2397	-64.697	-64.81	0	0
-4.2392	-64.697	-64.81	0	0
-4.2387	-64.697	-64.81	0	0
-4.2382	-64.697	-64.81	0	0
-4.2377	-64.697	-64.81	0	0
-4.2372	-64.707	-64.823	0	0
-4.2367	-64.762	-64.84	0	0
-4.2362	-64.762	-64.84	0	0
-4.2357	-64.762	-64.84	0	0
-4.2352	-64.762	-64.843	0	0
-4.2347	-64.762	-64.843	0	0
-4.2342	-64.762	-64.843	0	0
-4.2337	-64.762	-64.843	0	0
-4.2332	-64.762	-64.843	0	0
-4.2327	-64.762	-64.843	0	0
-4.2322	-64.762	-64.841	0	0
-4.2317	-64.762	-64.841	0	0
-4.2312	-64.762	-64.841	0	0
-4.2307	-64.762	-64.841	0	0
-4.2302	-64.762	-64.841	0	0
-4.2297	-64.762	-64.835	0	0
-4.2292	-64.762	-64.834	0	0
-4.2287	-64.762	-64.834	0	0
-4.2282	-64.765	-64.837	0	0
-4.2277	-64.806	-64.846	0	0
-4.2272	-64.824	-64.875	0	0
-4.2267	-64.853	-64.914	0	0
-4.2262	-64.886	-64.949	0	0
-4.2257	-64.887	-64.965	0	0
-4.2252	-64.887	-64.965	0	0
-4.2247	-64.887	-64.965	0	0
-4.2242	-64.887	-64.965	0	0
-4.2237	-64.887	-64.965	0	0
-4.2232	-64.887	-64.965	0	0
-4.2227	-64.857	-64.93	0	0
-4.2222	-64.819	-64.875	0	0
-4.2217	-64.756	-64.834	0	0
-4.2212	-64.684	-64.828	0	0
-4.2207	-64.684	-64.858	0	0
-4.2202	-64.674	-64.829	0	0
-4.2197	-64.655	-64.797	0	0
-4.2192	-64.639	-64.772	0	0
-4.2187	-64.61	-64.753	0	0
-4.2182	-64.583	-64.73	0	0
-4.2177	-64.556	-64.705	0	0
-4.2172	-64.544	-64.69	0	0
-4.2167	-64.546	-64.674	0	0
-4.2162	-64.546	-64.674	0	0
-4.2157	-64.56	-64.674	0	0
-4.2152	-64.572	-64.674	0	0
-4.2147	-64.56	-64.635	0	0
-4.2142	-64.545	-64.611	0	0
-4.2137	-64.538	-64.595	0	0
-4.2132	-64.526	-64.582	0	0
-4.2127	-64.512	-64.574	0	0
-4.2122	-64.5	-64.542	0	0
-4.2117	-64.498	-64.534	0	0
-4.2112	-64.498	-64.534	0	0
-4.2107	-64.498	-64.534	0	0
-4.2102	-64.501	-64.534	0	0
-4.2097	-64.509	-64.535	0	0
-4.2092	-64.529	-64.574	0	0
-4.2087	-64.549	-64.578	0	0
-4.2082	-64.558	-64.578	0	0
-4.2077	-64.574	-64.588	0	0
-4.2072	-64.581	-64.635	0	0
-4.2067	-64.655	-64.724	0	0
-4.2062	-64.732	-64.806	0	0
-4.2057	-64.803	-64.881	0	0
-4.2052	-64.868	-64.95	0	0
-4.2047	-64.928	-65.013	0	0
-4.2042	-64.983	-65.072	0	0
-4.2037	-65.041	-65.133	0	0
-4.2032	-65.105	-65.199	0	0
-4.2027	-65.122	-65.236	0	0
-4.2022	-65.122	-65.236	0	0
-4.2017	-65.122	-65.236	0	0
-4.2012	-65.122	-65.236	0	0
-4.2007	-65.122	-65.236	0	0
-4.2002	-65.122	-65.236	0	0
-4.1997	-65.122	-65.236	0	0
-4.1992	-65.122	-65.236	0	0
-4.1987	-65.122	-65.236	0	0
-4.1982	-65.072	-65.216	0	0
-4.1977	-65.044	-65.187	0	0
-4.1972	-65.019	-65.156	0	0
-4.1967	-65.001	-65.131	0	0
-4.1962	-64.982	-65.112	0	0
-4.1957	-64.963	-65.096	0	0
-4.1952	-64.946	-65.084	0	0
-4.1947	-64.935	-65.065	0	0
-4.1942	-64.91	-65.032	0	0
-4.1937	-64.818	-64.92	0	0
-4.1932	-64.634	-64.769	0	0
-4.1927	-64.63	-64.769	0	0
-4.1922	-64.63	-64.769	0	0
-4.1917	-64.63	-64.769	0	0
-4.1912	-64.63	-64.769	0	0
-4.1907	-64.63	-64.769	0	0
-4.1902	-64.63	-64.769	0	0
-4.1897	-64.63	-64.769	0	0
-4.1892	-64.63	-64.769	0	0
-4.1887	-64.641	-64.818	0	0
-4.1882	-64.718	-64.891	0	0
-4.1877	-64.788	-64.957	0	0
-4.1872	-64.853	-65.018	0	0
-4.1867	-64.913	-65.06	0	0
-4.1862	-64.913	-65.06	0	0
-4.1857	-64.913	-65.06	0	0
-4.1852	-64.913	-65.06	0	0
-4.1847	-64.913	-65.06	0	0
-4.1842	-64.913	-65.06	0	0
-4.1837	-64.913	-65.06	0	0
-4.1832	-64.913	-65.06	0	0
[truncated: 8,869 more rows]

## Sheet: Fig7C
-5.1827	-32.105	-32.045	0	0
-5.1822	-64.213	-64.104	0	0
-5.1817	-64.213	-64.104	0	0
-5.1812	-64.213	-64.104	0	0
-5.1807	-64.213	-64.104	0	0
-5.1802	-64.213	-64.104	0	0
-5.1797	-64.213	-64.104	0	0
-5.1792	-64.213	-64.104	0	0
-5.1787	-64.213	-64.104	0	0
-5.1782	-64.213	-64.104	0	0
-5.1777	-64.213	-64.104	0	0
-5.1772	-64.044	-64.048	0	0
-5.1767	-63.879	-63.888	0	0
-5.1762	-63.85	-63.875	0	0
-5.1757	-63.822	-63.86	0	0
-5.1752	-63.801	-63.832	0	0
-5.1747	-63.801	-63.832	0	0
-5.1742	-63.793	-63.822	0	0
-5.1737	-63.791	-63.818	0	0
-5.1732	-63.791	-63.812	0	0
-5.1727	-63.791	-63.8	0	0
-5.1722	-63.791	-63.8	0	0
-5.1717	-63.791	-63.8	0	0
-5.1712	-63.791	-63.8	0	0
-5.1707	-63.793	-63.803	0	0
-5.1702	-63.799	-63.813	0	0
-5.1697	-63.806	-63.821	0	0
-5.1692	-63.816	-63.831	0	0
-5.1687	-63.825	-63.842	0	0
-5.1682	-63.833	-63.858	0	0
-5.1677	-63.848	-63.875	0	0
-5.1672	-63.877	-63.888	0	0
-5.1667	-63.953	-63.964	0	0
-5.1662	-64.039	-63.992	0	0
-5.1657	-64.048	-64.013	0	0
-5.1652	-64.056	-64.031	0	0
-5.1647	-64.065	-64.044	0	0
-5.1642	-64.092	-64.07	0	0
-5.1637	-64.124	-64.102	0	0
-5.1632	-64.157	-64.137	0	0
-5.1627	-64.205	-64.171	0	0
-5.1622	-64.274	-64.24	0	0
-5.1617	-64.301	-64.281	0	0
-5.1612	-64.325	-64.3	0	0
-5.1607	-64.352	-64.325	0	0
-5.1602	-64.381	-64.353	0	0
-5.1597	-64.411	-64.363	0	0
-5.1592	-64.425	-64.377	0	0
-5.1587	-64.435	-64.395	0	0
-5.1582	-64.447	-64.411	0	0
-5.1577	-64.466	-64.433	0	0
-5.1572	-64.487	-64.459	0	0
-5.1567	-64.508	-64.472	0	0
-5.1562	-64.518	-64.479	0	0
-5.1557	-64.524	-64.488	0	0
-5.1552	-64.528	-64.49	0	0
-5.1547	-64.528	-64.49	0	0
-5.1542	-64.528	-64.49	0	0
-5.1537	-64.528	-64.49	0	0
-5.1532	-64.525	-64.483	0	0
-5.1527	-64.523	-64.478	0	0
-5.1522	-64.523	-64.478	0	0
-5.1517	-64.523	-64.478	0	0
-5.1512	-64.523	-64.478	0	0
-5.1507	-64.518	-64.471	0	0
-5.1502	-64.453	-64.422	0	0
-5.1497	-64.431	-64.386	0	0
-5.1492	-64.373	-64.355	0	0
-5.1487	-64.302	-64.3	0	0
-5.1482	-64.273	-64.27	0	0
-5.1477	-64.243	-64.236	0	0
-5.1472	-64.238	-64.226	0	0
-5.1467	-64.225	-64.215	0	0
-5.1462	-64.217	-64.196	0	0
-5.1457	-64.208	-64.186	0	0
-5.1452	-64.206	-64.185	0	0
-5.1447	-64.201	-64.178	0	0
-5.1442	-64.187	-64.172	0	0
-5.1437	-64.173	-64.161	0	0
-5.1432	-64.171	-64.156	0	0
-5.1427	-64.171	-64.156	0	0
-5.1422	-64.167	-64.145	0	0
-5.1417	-64.149	-64.125	0	0
-5.1412	-64.134	-64.109	0	0
-5.1407	-64.125	-64.109	0	0
-5.1402	-64.125	-64.109	0	0
-5.1397	-64.117	-64.107	0	0
-5.1392	-64.099	-64.103	0	0
-5.1387	-64.078	-64.105	0	0
-5.1382	-64.064	-64.102	0	0
-5.1377	-64.05	-64.088	0	0
-5.1372	-64.044	-64.082	0	0
-5.1367	-64.036	-64.076	0	0
-5.1362	-64.019	-64.067	0	0
-5.1357	-64.002	-64.061	0	0
-5.1352	-63.987	-64.051	0	0
-5.1347	-63.98	-64.043	0	0
-5.1342	-63.98	-64.043	0	0
-5.1337	-63.991	-64.051	0	0
-5.1332	-63.996	-64.06	0	0
-5.1327	-64	-64.06	0	0
-5.1322	-64.017	-64.061	0	0
-5.1317	-64.017	-64.061	0	0
-5.1312	-64.025	-64.056	0	0
-5.1307	-64.025	-64.041	0	0
-5.1302	-64.025	-64.026	0	0
-5.1297	-64.025	-64.026	0	0
-5.1292	-64.025	-64.026	0	0
-5.1287	-64.026	-64.026	0	0
-5.1282	-64.048	-64.043	0	0
-5.1277	-64.07	-64.057	0	0
-5.1272	-64.081	-64.058	0	0
-5.1267	-64.087	-64.065	0	0
-5.1262	-64.096	-64.089	0	0
-5.1257	-64.112	-64.122	0	0
-5.1252	-64.14	-64.133	0	0
-5.1247	-64.204	-64.152	0	0
-5.1242	-64.241	-64.167	0	0
-5.1237	-64.264	-64.188	0	0
-5.1232	-64.292	-64.219	0	0
-5.1227	-64.321	-64.25	0	0
-5.1222	-64.348	-64.281	0	0
-5.1217	-64.375	-64.308	0	0
-5.1212	-64.399	-64.346	0	0
-5.1207	-64.445	-64.398	0	0
-5.1202	-64.492	-64.446	0	0
-5.1197	-64.535	-64.491	0	0
-5.1192	-64.57	-64.501	0	0
-5.1187	-64.57	-64.505	0	0
-5.1182	-64.57	-64.505	0	0
-5.1177	-64.57	-64.505	0	0
-5.1172	-64.574	-64.511	0	0
-5.1167	-64.58	-64.523	0	0
-5.1162	-64.588	-64.535	0	0
-5.1157	-64.593	-64.54	0	0
-5.1152	-64.593	-64.54	0	0
-5.1147	-64.593	-64.54	0	0
-5.1142	-64.593	-64.54	0	0
-5.1137	-64.588	-64.526	0	0
-5.1132	-64.579	-64.513	0	0
-5.1127	-64.578	-64.513	0	0
-5.1122	-64.578	-64.513	0	0
-5.1117	-64.578	-64.513	0	0
-5.1112	-64.578	-64.513	0	0
-5.1107	-64.578	-64.521	0	0
-5.1102	-64.587	-64.534	0	0
-5.1097	-64.59	-64.539	0	0
-5.1092	-64.592	-64.539	0	0
-5.1087	-64.616	-64.562	0	0
-5.1082	-64.641	-64.587	0	0
-5.1077	-64.664	-64.614	0	0
-5.1072	-64.696	-64.645	0	0
-5.1067	-64.756	-64.708	0	0
-5.1062	-64.812	-64.766	0	0
-5.1057	-64.866	-64.823	0	0
-5.1052	-64.928	-64.887	0	0
-5.1047	-65.001	-64.962	0	0
-5.1042	-65.042	-65.025	0	0
-5.1037	-65.051	-65.027	0	0
-5.1032	-65.051	-65.027	0	0
-5.1027	-65.051	-65.027	0	0
-5.1022	-65.051	-65.027	0	0
-5.1017	-65.051	-65.027	0	0
-5.1012	-65.051	-65.027	0	0
-5.1007	-65.051	-65.027	0	0
-5.1002	-65.051	-65.027	0	0
-5.0997	-65.051	-65.027	0	0
-5.0992	-65.044	-65.025	0	0
-5.0987	-65.007	-64.975	0	0
-5.0982	-65.007	-64.975	0	0
-5.0977	-65.007	-64.975	0	0
-5.0972	-65.007	-64.975	0	0
-5.0967	-65.007	-64.975	0	0
-5.0962	-65.007	-64.975	0	0
-5.0957	-65.006	-64.965	0	0
-5.0952	-65.005	-64.959	0	0
-5.0947	-65.001	-64.958	0	0
-5.0942	-64.995	-64.95	0	0
-5.0937	-64.987	-64.944	0	0
-5.0932	-64.958	-64.941	0	0
-5.0927	-64.929	-64.941	0	0
-5.0922	-64.924	-64.944	0	0
-5.0917	-64.924	-64.944	0	0
-5.0912	-64.924	-64.944	0	0
-5.0907	-64.924	-64.944	0	0
-5.0902	-64.924	-64.952	0	0
-5.0897	-64.931	-64.96	0	0
-5.0892	-64.931	-64.967	0	0
-5.0887	-64.931	-64.969	0	0
-5.0882	-64.915	-64.966	0	0
-5.0877	-64.897	-64.956	0	0
-5.0872	-64.879	-64.947	0	0
-5.0867	-64.86	-64.94	0	0
-5.0862	-64.858	-64.94	0	0
-5.0857	-64.858	-64.945	0	0
-5.0852	-64.855	-64.944	0	0
-5.0847	-64.842	-64.934	0	0
-5.0842	-64.842	-64.933	0	0
-5.0837	-64.833	-64.933	0	0
-5.0832	-64.813	-64.925	0	0
-5.0827	-64.794	-64.91	0	0
-5.0822	-64.786	-64.898	0	0
-5.0817	-64.786	-64.898	0	0
-5.0812	-64.786	-64.898	0	0
-5.0807	-64.769	-64.877	0	0
-5.0802	-64.754	-64.865	0	0
-5.0797	-64.583	-64.78	0	0
-5.0792	-64.554	-64.689	0	0
-5.0787	-64.524	-64.682	0	0
-5.0782	-64.445	-64.508	0	0
-5.0777	-64.41	-64.43	0	0
-5.0772	-64.385	-64.401	0	0
-5.0767	-64.368	-64.388	0	0
-5.0762	-64.352	-64.372	0	0
-5.0757	-64.34	-64.361	0	0
-5.0752	-64.332	-64.349	0	0
-5.0747	-64.299	-64.312	0	0
-5.0742	-64.275	-64.292	0	0
-5.0737	-64.251	-64.271	0	0
-5.0732	-64.229	-64.248	0	0
-5.0727	-64.228	-64.249	0	0
-5.0722	-64.246	-64.267	0	0
-5.0717	-64.265	-64.284	0	0
-5.0712	-64.281	-64.299	0	0
-5.0707	-64.304	-64.318	0	0
-5.0702	-64.318	-64.336	0	0
-5.0697	-64.284	-64.304	0	0
-5.0692	-64.261	-64.287	0	0
-5.0687	-64.239	-64.269	0	0
-5.0682	-64.215	-64.262	0	0
-5.0677	-64.194	-64.246	0	0
-5.0672	-64.18	-64.228	0	0
-5.0667	-64.167	-64.218	0	0
-5.0662	-64.167	-64.218	0	0
-5.0657	-64.182	-64.225	0	0
-5.0652	-64.182	-64.225	0	0
-5.0647	-64.177	-64.211	0	0
-5.0642	-64.178	-64.212	0	0
-5.0637	-64.186	-64.229	0	0
-5.0632	-64.197	-64.246	0	0
-5.0627	-64.197	-64.254	0	0
-5.0622	-64.197	-64.254	0	0
-5.0617	-64.197	-64.254	0	0
-5.0612	-64.197	-64.254	0	0
-5.0607	-64.197	-64.254	0	0
-5.0602	-64.197	-64.254	0	0
-5.0597	-64.212	-64.254	0	0
-5.0592	-64.284	-64.311	0	0
-5.0587	-64.357	-64.387	0	0
-5.0582	-64.425	-64.452	0	0
-5.0577	-64.487	-64.51	0	0
-5.0572	-64.541	-64.562	0	0
-5.0567	-64.586	-64.572	0	0
-5.0562	-64.586	-64.572	0	0
-5.0557	-64.586	-64.572	0	0
-5.0552	-64.586	-64.572	0	0
-5.0547	-64.586	-64.572	0	0
-5.0542	-64.586	-64.572	0	0
-5.0537	-64.586	-64.572	0	0
-5.0532	-64.586	-64.572	0	0
-5.0527	-64.586	-64.572	0	0
-5.0522	-64.586	-64.572	0	0
-5.0517	-64.576	-64.531	0	0
-5.0512	-64.42	-64.321	0	0
-5.0507	-64.245	-64.192	0	0
-5.0502	-64.216	-64.192	0	0
-5.0497	-64.185	-64.166	0	0
-5.0492	-64.185	-64.166	0	0
-5.0487	-64.185	-64.166	0	0
-5.0482	-64.185	-64.166	0	0
-5.0477	-64.185	-64.166	0	0
-5.0472	-64.185	-64.163	0	0
-5.0467	-64.185	-64.133	0	0
-5.0462	-64.185	-64.133	0	0
-5.0457	-64.199	-64.145	0	0
-5.0452	-64.239	-64.166	0	0
-5.0447	-64.276	-64.181	0	0
-5.0442	-64.284	-64.202	0	0
-5.0437	-64.288	-64.217	0	0
-5.0432	-64.288	-64.217	0	0
-5.0427	-64.288	-64.225	0	0
-5.0422	-64.297	-64.24	0	0
-5.0417	-64.31	-64.248	0	0
-5.0412	-64.324	-64.257	0	0
-5.0407	-64.341	-64.27	0	0
-5.0402	-64.352	-64.282	0	0
-5.0397	-64.361	-64.302	0	0
-5.0392	-64.377	-64.318	0	0
-5.0387	-64.373	-64.309	0	0
-5.0382	-64.362	-64.309	0	0
-5.0377	-64.354	-64.318	0	0
-5.0372	-64.354	-64.318	0	0
-5.0367	-64.356	-64.326	0	0
-5.0362	-64.37	-64.338	0	0
-5.0357	-64.387	-64.344	0	0
-5.0352	-64.371	-64.341	0	0
-5.0347	-64.371	-64.334	0	0
-5.0342	-64.369	-64.33	0	0
-5.0337	-64.368	-64.328	0	0
-5.0332	-64.368	-64.328	0	0
-5.0327	-64.37	-64.334	0	0
-5.0322	-64.378	-64.343	0	0
-5.0317	-64.386	-64.349	0	0
-5.0312	-64.386	-64.349	0	0
-5.0307	-64.386	-64.349	0	0
-5.0302	-64.386	-64.349	0	0
-5.0297	-64.386	-64.349	0	0
-5.0292	-64.386	-64.352	0	0
-5.0287	-64.399	-64.365	0	0
-5.0282	-64.413	-64.382	0	0
-5.0277	-64.428	-64.403	0	0
-5.0272	-64.449	-64.428	0	0
-5.0267	-64.5	-64.48	0	0
-5.0262	-64.548	-64.528	0	0
-5.0257	-64.591	-64.572	0	0
-5.0252	-64.621	-64.613	0	0
-5.0247	-64.635	-64.622	0	0
-5.0242	-64.652	-64.638	0	0
-5.0237	-64.669	-64.655	0	0
-5.0232	-64.686	-64.671	0	0
-5.0227	-64.702	-64.688	0	0
-5.0222	-64.717	-64.704	0	0
-5.0217	-64.73	-64.712	0	0
-5.0212	-64.73	-64.712	0	0
-5.0207	-64.73	-64.712	0	0
-5.0202	-64.73	-64.712	0	0
-5.0197	-64.73	-64.712	0	0
-5.0192	-64.73	-64.712	0	0
-5.0187	-64.725	-64.706	0	0
-5.0182	-64.703	-64.686	0	0
-5.0177	-64.678	-64.667	0	0
-5.0172	-64.648	-64.643	0	0
-5.0167	-64.622	-64.621	0	0
-5.0162	-64.474	-64.532	0	0
-5.0157	-64.454	-64.503	0	0
-5.0152	-64.435	-64.482	0	0
-5.0147	-64.417	-64.467	0	0
-5.0142	-64.398	-64.45	0	0
-5.0137	-64.378	-64.432	0	0
-5.0132	-64.359	-64.415	0	0
-5.0127	-64.34	-64.402	0	0
-5.0122	-64.321	-64.385	0	0
-5.0117	-64.307	-64.351	0	0
-5.0112	-64.298	-64.328	0	0
-5.0107	-64.19	-64.245	0	0
-5.0102	-64.1	-64.182	0	0
-5.0097	-64.056	-64.15	0	0
-5.0092	-64.011	-64.111	0	0
-5.0087	-63.975	-64.08	0	0
-5.0082	-63.949	-64.062	0	0
-5.0077	-63.885	-64.016	0	0
-5.0072	-63.866	-63.993	0	0
-5.0067	-63.854	-63.991	0	0
-5.0062	-63.854	-63.991	0	0
-5.0057	-63.854	-63.991	0	0
-5.0052	-63.854	-63.991	0	0
-5.0047	-63.854	-63.991	0	0
-5.0042	-63.854	-63.991	0	0
-5.0037	-63.854	-63.991	0	0
-5.0032	-63.854	-63.991	0	0
-5.0027	-63.869	-64.007	0	0
-5.0022	-63.887	-64.027	0	0
-5.0017	-63.937	-64.064	0	0
-5.0012	-64.011	-64.15	0	0
-5.0007	-64.011	-64.15	0	0
-5.0002	-64.011	-64.15	0	0
-4.9997	-64.024	-64.15	0	0
-4.9992	-64.047	-64.173	0	0
-4.9987	-64.081	-64.196	0	0
-4.9982	-64.093	-64.2	0	0
-4.9977	-64.093	-64.2	0	0
-4.9972	-64.116	-64.211	0	0
-4.9967	-64.126	-64.22	0	0
-4.9962	-64.139	-64.233	0	0
-4.9957	-64.153	-64.246	0	0
-4.9952	-64.161	-64.247	0	0
-4.9947	-64.161	-64.245	0	0
-4.9942	-64.161	-64.239	0	0
-4.9937	-64.161	-64.239	0	0
-4.9932	-64.161	-64.239	0	0
-4.9927	-64.164	-64.239	0	0
-4.9922	-64.194	-64.248	0	0
-4.9917	-64.235	-64.256	0	0
-4.9912	-64.258	-64.289	0	0
-4.9907	-64.268	-64.325	0	0
-4.9902	-64.271	-64.34	0	0
-4.9897	-64.271	-64.34	0	0
-4.9892	-64.271	-64.34	0	0
-4.9887	-64.271	-64.34	0	0
-4.9882	-64.278	-64.343	0	0
-4.9877	-64.292	-64.35	0	0
-4.9872	-64.306	-64.361	0	0
-4.9867	-64.32	-64.374	0	0
-4.9862	-64.324	-64.377	0	0
-4.9857	-64.355	-64.395	0	0
-4.9852	-64.386	-64.425	0	0
-4.9847	-64.415	-64.454	0	0
-4.9842	-64.437	-64.481	0	0
-4.9837	-64.457	-64.498	0	0
-4.9832	-64.481	-64.518	0	0
-4.9827	-64.49	-64.541	0	0
-4.9822	-64.494	-64.564	0	0
-4.9817	-64.494	-64.565	0	0
-4.9812	-64.494	-64.56	0	0
-4.9807	-64.499	-64.56	0	0
-4.9802	-64.499	-64.56	0	0
-4.9797	-64.499	-64.56	0	0
-4.9792	-64.499	-64.56	0	0
-4.9787	-64.499	-64.56	0	0
-4.9782	-64.499	-64.56	0	0
-4.9777	-64.499	-64.56	0	0
-4.9772	-64.499	-64.56	0	0
-4.9767	-64.499	-64.56	0	0
-4.9762	-64.487	-64.533	0	0
-4.9757	-64.4	-64.437	0	0
-4.9752	-64.38	-64.417	0	0
-4.9747	-64.363	-64.399	0	0
-4.9742	-64.325	-64.359	0	0
-4.9737	-64.289	-64.324	0	0
-4.9732	-64.266	-64.3	0	0
-4.9727	-64.252	-64.289	0	0
-4.9722	-64.237	-64.275	0	0
-4.9717	-64.223	-64.266	0	0
-4.9712	-64.205	-64.232	0	0
-4.9707	-64.185	-64.216	0	0
-4.9702	-64.169	-64.208	0	0
-4.9697	-64.161	-64.196	0	0
-4.9692	-64.151	-64.178	0	0
-4.9687	-64.137	-64.165	0	0
-4.9682	-64.109	-64.117	0	0
-4.9677	-64.075	-64.077	0	0
-4.9672	-64.058	-64.063	0	0
-4.9667	-64.04	-64.036	0	0
-4.9662	-64	-64.01	0	0
-4.9657	-63.977	-63.978	0	0
-4.9652	-63.973	-63.967	0	0
-4.9647	-63.973	-63.965	0	0
-4.9642	-63.973	-63.952	0	0
-4.9637	-63.973	-63.947	0	0
-4.9632	-63.973	-63.947	0	0
-4.9627	-63.973	-63.947	0	0
-4.9622	-63.973	-63.947	0	0
-4.9617	-63.984	-63.949	0	0
-4.9612	-64.002	-63.961	0	0
-4.9607	-64.012	-63.971	0	0
-4.9602	-64.027	-63.986	0	0
-4.9597	-64.04	-63.993	0	0
-4.9592	-64.041	-63.993	0	0
-4.9587	-64.073	-64.015	0	0
-4.9582	-64.13	-64.062	0	0
-4.9577	-64.145	-64.084	0	0
-4.9572	-64.169	-64.114	0	0
-4.9567	-64.194	-64.143	0	0
-4.9562	-64.255	-64.197	0	0
-4.9557	-64.255	-64.197	0	0
-4.9552	-64.255	-64.197	0	0
-4.9547	-64.255	-64.197	0	0
-4.9542	-64.255	-64.197	0	0
-4.9537	-64.258	-64.212	0	0
-4.9532	-64.258	-64.212	0	0
-4.9527	-64.258	-64.212	0	0
-4.9522	-64.269	-64.22	0	0
-4.9517	-64.3	-64.253	0	0
-4.9512	-64.33	-64.287	0	0
-4.9507	-64.341	-64.299	0	0
-4.9502	-64.343	-64.303	0	0
-4.9497	-64.343	-64.303	0	0
-4.9492	-64.343	-64.303	0	0
-4.9487	-64.343	-64.317	0	0
-4.9482	-64.343	-64.329	0	0
-4.9477	-64.343	-64.329	0	0
-4.9472	-64.343	-64.329	0	0
-4.9467	-64.361	-64.336	0	0
-4.9462	-64.421	-64.379	0	0
-4.9457	-64.444	-64.392	0	0
-4.9452	-64.459	-64.412	0	0
-4.9447	-64.477	-64.435	0	0
-4.9442	-64.513	-64.456	0	0
-4.9437	-64.592	-64.536	0	0
-4.9432	-64.671	-64.617	0	0
-4.9427	-64.743	-64.691	0	0
-4.9422	-64.808	-64.758	0	0
-4.9417	-64.866	-64.818	0	0
-4.9412	-64.899	-64.855	0	0
-4.9407	-64.912	-64.868	0	0
-4.9402	-64.927	-64.884	0	0
-4.9397	-64.944	-64.902	0	0
-4.9392	-64.96	-64.918	0	0
-4.9387	-64.974	-64.934	0	0
-4.9382	-64.988	-64.949	0	0
-4.9377	-65.001	-64.962	0	0
-4.9372	-65.013	-64.975	0	0
-4.9367	-65.022	-64.984	0	0
-4.9362	-65.022	-64.984	0	0
-4.9357	-65.022	-64.984	0	0
-4.9352	-65.022	-64.984	0	0
-4.9347	-65.016	-64.981	0	0
-4.9342	-65	-64.962	0	0
-4.9337	-64.984	-64.948	0	0
-4.9332	-64.973	-64.935	0	0
-4.9327	-64.964	-64.925	0	0
-4.9322	-64.964	-64.925	0	0
-4.9317	-64.964	-64.925	0	0
-4.9312	-64.964	-64.925	0	0
-4.9307	-64.944	-64.914	0	0
-4.9302	-64.944	-64.914	0	0
-4.9297	-64.944	-64.914	0	0
-4.9292	-64.944	-64.914	0	0
-4.9287	-64.944	-64.914	0	0
-4.9282	-64.944	-64.914	0	0
-4.9277	-64.938	-64.907	0	0
-4.9272	-64.929	-64.895	0	0
-4.9267	-64.924	-64.891	0	0
-4.9262	-64.924	-64.895	0	0
-4.9257	-64.927	-64.905	0	0
-4.9252	-64.927	-64.91	0	0
-4.9247	-64.927	-64.91	0	0
-4.9242	-64.932	-64.913	0	0
-4.9237	-64.932	-64.913	0	0
-4.9232	-64.932	-64.913	0	0
-4.9227	-64.932	-64.913	0	0
-4.9222	-64.932	-64.913	0	0
-4.9217	-64.932	-64.913	0	0
-4.9212	-64.932	-64.913	0	0
-4.9207	-64.922	-64.899	0	0
-4.9202	-64.897	-64.871	0	0
-4.9197	-64.878	-64.854	0	0
-4.9192	-64.793	-64.631	0	0
-4.9187	-64.701	-64.606	0	0
-4.9182	-64.597	-64.596	0	0
-4.9177	-64.565	-64.57	0	0
-4.9172	-64.534	-64.545	0	0
-4.9167	-64.52	-64.516	0	0
-4.9162	-64.52	-64.511	0	0
-4.9157	-64.52	-64.511	0	0
-4.9152	-64.52	-64.511	0	0
-4.9147	-64.52	-64.511	0	0
-4.9142	-64.52	-64.511	0	0
-4.9137	-64.52	-64.511	0	0
-4.9132	-64.52	-64.511	0	0
-4.9127	-64.535	-64.517	0	0
-4.9122	-64.56	-64.54	0	0
-4.9117	-64.583	-64.563	0	0
-4.9112	-64.587	-64.572	0	0
-4.9107	-64.587	-64.572	0	0
-4.9102	-64.587	-64.572	0	0
-4.9097	-64.569	-64.551	0	0
-4.9092	-64.569	-64.55	0	0
-4.9087	-64.569	-64.55	0	0
-4.9082	-64.581	-64.565	0	0
-4.9077	-64.602	-64.585	0	0
-4.9072	-64.624	-64.606	0	0
-4.9067	-64.644	-64.627	0	0
-4.9062	-64.665	-64.647	0	0
-4.9057	-64.676	-64.667	0	0
-4.9052	-64.659	-64.678	0	0
-4.9047	-64.63	-64.672	0	0
-4.9042	-64.61	-64.651	0	0
-4.9037	-64.6	-64.621	0	0
-4.9032	-64.582	-64.591	0	0
-4.9027	-64.57	-64.591	0	0
-4.9022	-64.57	-64.591	0	0
-4.9017	-64.57	-64.591	0	0
-4.9012	-64.569	-64.599	0	0
-4.9007	-64.569	-64.599	0	0
-4.9002	-64.569	-64.601	0	0
-4.8997	-64.584	-64.617	0	0
-4.8992	-64.598	-64.631	0	0
-4.8987	-64.602	-64.646	0	0
-4.8982	-64.602	-64.658	0	0
-4.8977	-64.603	-64.665	0	0
-4.8972	-64.603	-64.668	0	0
-4.8967	-64.603	-64.668	0	0
-4.8962	-64.603	-64.668	0	0
-4.8957	-64.603	-64.668	0	0
-4.8952	-64.61	-64.668	0	0
-4.8947	-64.622	-64.677	0	0
-4.8942	-64.638	-64.691	0	0
-4.8937	-64.655	-64.705	0	0
-4.8932	-64.67	-64.718	0	0
-4.8927	-64.694	-64.741	0	0
-4.8922	-64.707	-64.743	0	0
-4.8917	-64.707	-64.743	0	0
-4.8912	-64.707	-64.743	0	0
-4.8907	-64.707	-64.743	0	0
-4.8902	-64.707	-64.743	0	0
-4.8897	-64.707	-64.743	0	0
-4.8892	-64.707	-64.743	0	0
-4.8887	-64.707	-64.734	0	0
-4.8882	-64.707	-64.734	0	0
-4.8877	-64.707	-64.734	0	0
-4.8872	-64.696	-64.71	0	0
-4.8867	-64.696	-64.71	0	0
-4.8862	-64.696	-64.71	0	0
-4.8857	-64.696	-64.71	0	0
-4.8852	-64.696	-64.71	0	0
-4.8847	-64.696	-64.71	0	0
-4.8842	-64.696	-64.71	0	0
-4.8837	-64.696	-64.71	0	0
-4.8832	-64.696	-64.71	0	0
-4.8827	-64.696	-64.71	0	0
-4.8822	-64.734	-64.757	0	0
-4.8817	-64.792	-64.814	0	0
-4.8812	-64.842	-64.864	0	0
-4.8807	-64.887	-64.908	0	0
-4.8802	-64.926	-64.946	0	0
-4.8797	-64.96	-64.98	0	0
-4.8792	-64.99	-65.009	0	0
-4.8787	-65.017	-65.035	0	0
-4.8782	-65.04	-65.057	0	0
-4.8777	-65.06	-65.077	0	0
-4.8772	-65.079	-65.095	0	0
-4.8767	-65.107	-65.123	0	0
-4.8762	-65.141	-65.157	0	0
-4.8757	-65.176	-65.191	0	0
-4.8752	-65.209	-65.223	0	0
-4.8747	-65.237	-65.251	0	0
-4.8742	-65.261	-65.274	0	0
-4.8737	-65.28	-65.293	0	0
-4.8732	-65.295	-65.308	0	0
-4.8727	-65.306	-65.318	0	0
-4.8722	-65.314	-65.326	0	0
-4.8717	-65.314	-65.326	0	0
-4.8712	-65.314	-65.326	0	0
-4.8707	-65.314	-65.326	0	0
-4.8702	-65.314	-65.326	0	0
-4.8697	-65.314	-65.326	0	0
-4.8692	-65.314	-65.326	0	0
-4.8687	-65.314	-65.326	0	0
-4.8682	-65.314	-65.326	0	0
-4.8677	-65.314	-65.326	0	0
-4.8672	-65.314	-65.326	0	0
-4.8667	-65.202	-65.215	0	0
-4.8662	-65.19	-65.205	0	0
-4.8657	-65.181	-65.195	0	0
-4.8652	-65.061	-65.139	0	0
-4.8647	-65.007	-65.06	0	0
-4.8642	-65	-65.048	0	0
-4.8637	-64.952	-64.984	0	0
-4.8632	-64.866	-64.898	0	0
-4.8627	-64.866	-64.898	0	0
-4.8622	-64.866	-64.898	0	0
-4.8617	-64.866	-64.897	0	0
-4.8612	-64.858	-64.889	0	0
-4.8607	-64.85	-64.881	0	0
-4.8602	-64.844	-64.874	0	0
-4.8597	-64.836	-64.868	0	0
-4.8592	-64.836	-64.855	0	0
-4.8587	-64.836	-64.855	0	0
-4.8582	-64.836	-64.855	0	0
-4.8577	-64.836	-64.855	0	0
-4.8572	-64.836	-64.852	0	0
-4.8567	-64.834	-64.843	0	0
-4.8562	-64.834	-64.843	0	0
-4.8557	-64.834	-64.843	0	0
-4.8552	-64.834	-64.843	0	0
-4.8547	-64.834	-64.843	0	0
-4.8542	-64.834	-64.838	0	0
-4.8537	-64.829	-64.814	0	0
-4.8532	-64.811	-64.788	0	0
-4.8527	-64.797	-64.763	0	0
-4.8522	-64.786	-64.747	0	0
-4.8517	-64.782	-64.724	0	0
-4.8512	-64.7	-64.549	0	0
-4.8507	-64.571	-64.53	0	0
-4.8502	-64.415	-64.428	0	0
-4.8497	-64.395	-64.413	0	0
-4.8492	-64.38	-64.381	0	0
-4.8487	-64.353	-64.351	0	0
-4.8482	-64.346	-64.332	0	0
-4.8477	-64.346	-64.332	0	0
-4.8472	-64.346	-64.332	0	0
-4.8467	-64.346	-64.332	0	0
-4.8462	-64.346	-64.332	0	0
-4.8457	-64.346	-64.315	0	0
-4.8452	-64.346	-64.301	0	0
-4.8447	-64.353	-64.307	0	0
-4.8442	-64.364	-64.322	0	0
-4.8437	-64.377	-64.338	0	0
-4.8432	-64.383	-64.338	0	0
-4.8427	-64.384	-64.338	0	0
-4.8422	-64.402	-64.356	0	0
-4.8417	-64.428	-64.379	0	0
-4.8412	-64.458	-64.39	0	0
-4.8407	-64.489	-64.403	0	0
-4.8402	-64.518	-64.42	0	0
-4.8397	-64.528	-64.439	0	0
-4.8392	-64.538	-64.457	0	0
-4.8387	-64.55	-64.475	0	0
-4.8382	-64.564	-64.493	0	0
-4.8377	-64.578	-64.51	0	0
-4.8372	-64.591	-64.526	0	0
-4.8367	-64.599	-64.53	0	0
-4.8362	-64.608	-64.547	0	0
-4.8357	-64.647	-64.574	0	0
-4.8352	-64.662	-64.574	0	0
-4.8347	-64.662	-64.574	0	0
-4.8342	-64.662	-64.574	0	0
-4.8337	-64.662	-64.574	0	0
-4.8332	-64.662	-64.574	0	0
-4.8327	-64.662	-64.574	0	0
-4.8322	-64.662	-64.574	0	0
-4.8317	-64.668	-64.589	0	0
-4.8312	-64.687	-64.61	0	0
-4.8307	-64.705	-64.629	0	0
-4.8302	-64.722	-64.645	0	0
-4.8297	-64.716	-64.632	0	0
-4.8292	-64.69	-64.602	0	0
-4.8287	-64.665	-64.584	0	0
-4.8282	-64.647	-64.567	0	0
-4.8277	-64.636	-64.55	0	0
-4.8272	-64.628	-64.54	0	0
-4.8267	-64.614	-64.539	0	0
-4.8262	-64.612	-64.539	0	0
-4.8257	-64.612	-64.539	0	0
-4.8252	-64.612	-64.547	0	0
-4.8247	-64.628	-64.559	0	0
-4.8242	-64.628	-64.565	0	0
-4.8237	-64.628	-64.572	0	0
-4.8232	-64.634	-64.582	0	0
-4.8227	-64.642	-64.592	0	0
-4.8222	-64.65	-64.604	0	0
-4.8217	-64.656	-64.617	0	0
-4.8212	-64.656	-64.623	0	0
-4.8207	-64.656	-64.623	0	0
-4.8202	-64.656	-64.623	0	0
-4.8197	-64.667	-64.645	0	0
-4.8192	-64.69	-64.669	0	0
-4.8187	-64.712	-64.692	0	0
-4.8182	-64.733	-64.699	0	0
-4.8177	-64.739	-64.699	0	0
-4.8172	-64.739	-64.699	0	0
-4.8167	-64.739	-64.699	0	0
-4.8162	-64.739	-64.699	0	0
-4.8157	-64.742	-64.701	0	0
-4.8152	-64.766	-64.71	0	0
-4.8147	-64.792	-64.718	0	0
-4.8142	-64.805	-64.734	0	0
-4.8137	-64.812	-64.749	0	0
-4.8132	-64.823	-64.766	0	0
-4.8127	-64.834	-64.781	0	0
-4.8122	-64.845	-64.79	0	0
-4.8117	-64.853	-64.79	0	0
-4.8112	-64.853	-64.793	0	0
-4.8107	-64.866	-64.815	0	0
-4.8102	-64.885	-64.837	0	0
-4.8097	-64.899	-64.854	0	0
-4.8092	-64.899	-64.854	0	0
-4.8087	-64.891	-64.839	0	0
-4.8082	-64.881	-64.827	0	0
-4.8077	-64.881	-64.827	0	0
-4.8072	-64.881	-64.827	0	0
-4.8067	-64.881	-64.827	0	0
-4.8062	-64.881	-64.827	0	0
-4.8057	-64.881	-64.827	0	0
-4.8052	-64.881	-64.827	0	0
-4.8047	-64.875	-64.812	0	0
-4.8042	-64.613	-64.551	0	0
-4.8037	-64.534	-64.534	0	0
-4.8032	-64.5	-64.509	0	0
-4.8027	-64.464	-64.48	0	0
-4.8022	-64.436	-64.461	0	0
-4.8017	-64.436	-64.461	0	0
-4.8012	-64.436	-64.461	0	0
-4.8007	-64.436	-64.461	0	0
-4.8002	-64.425	-64.439	0	0
-4.7997	-64.404	-64.416	0	0
-4.7992	-64.381	-64.396	0	0
-4.7987	-64.366	-64.385	0	0
-4.7982	-64.366	-64.385	0	0
-4.7977	-64.384	-64.402	0	0.0045525
-4.7972	-64.404	-64.419	0	0.005027
-4.7967	-64.423	-64.439	0.004485	0.0055476
-4.7962	-64.441	-64.458	0.004953	0.0061182
-4.7957	-64.441	-64.473	0.0054664	0.0067433
-4.7952	-64.441	-64.473	0.0060292	0.011868
-4.7947	-64.468	-64.495	0.0066459	0.013081
-4.7942	-64.497	-64.527	0.011652	0.014408
-4.7937	-64.525	-64.559	0.012844	0.01586
-4.7932	-64.554	-64.589	0.014149	0.017447
-4.7927	-64.58	-64.619	0.015576	0.019181
-4.7922	-64.633	-64.666	0.017137	0.025605
-4.7917	-64.703	-64.733	0.018843	0.028143
-4.7912	-64.766	-64.794	0.025303	0.030914
-4.7907	-64.819	-64.844	0.027814	0.033937
-4.7902	-64.826	-64.851	0.030556	0.037233
-4.7897	-64.84	-64.864	0.033547	0.045176
-4.7892	-64.855	-64.88	0.036809	0.04954
-4.7887	-64.872	-64.895	0.044715	0.054292
-4.7882	-64.887	-64.911	0.049039	0.059464
-4.7877	-64.903	-64.922	0.053748	0.065088
-4.7872	-64.903	-64.922	0.058874	0.0712
-4.7867	-64.903	-64.922	0.064448	0.077839
-4.7862	-64.903	-64.922	0.070507	0.089311
-4.7857	-64.909	-64.923	0.077089	0.097574
-4.7852	-64.918	-64.931	0.084233	0.10654
-4.7847	-64.918	-64.93	0.096401	0.11625
-4.7842	-64.908	-64.919	0.10526	0.12677
-4.7837	-64.898	-64.909	0.11487	0.13817
-4.7832	-64.888	-64.898	0.12528	0.15049
-4.7827	-64.885	-64.894	0.13655	0.16381
-4.7822	-64.885	-64.894	0.14874	0.17821
-4.7817	-64.885	-64.894	0.16192	0.19375
-4.7812	-64.882	-64.884	0.17617	0.21052
-4.7807	-64.868	-64.872	0.19155	0.22861
-4.7802	-64.861	-64.866	0.20814	0.2481
-4.7797	-64.789	-64.783	0.22604	0.26908
-4.7792	-64.763	-64.755	0.24533	0.29166
-4.7787	-64.741	-64.73	0.2661	0.31595
-4.7782	-64.661	-64.706	0.28846	0.34205
-4.7777	-64.522	-64.526	0.3125	0.37008
-4.7772	-64.471	-64.467	0.33834	0.40017
-4.7767	-64.45	-64.453	0.3661	0.43244
-4.7762	-64.338	-64.421	0.39589	0.46704
-4.7757	-64.301	-64.402	0.42785	0.50409
-4.7752	-64.279	-64.385	0.46211	0.54375
-4.7747	-64.259	-64.369	0.49881	0.58618
-4.7742	-64.257	-64.357	0.5381	0.63154
-4.7737	-64.244	-64.347	0.58014	0.67999
-4.7732	-64.243	-64.335	0.62507	0.73172
-4.7727	-64.243	-64.331	0.67308	0.78691
-4.7722	-64.237	-64.32	0.72434	0.84575
-4.7717	-64.232	-64.303	0.77903	0.90844
-4.7712	-64.23	-64.286	0.83734	0.97518
-4.7707	-64.234	-64.296	0.89948	1.0462
-4.7702	-64.24	-64.304	0.96563	1.1217
-4.7697	-64.246	-64.297	1.036	1.2019
-4.7692	-64.244	-64.286	1.1109	1.2871
-4.7687	-64.24	-64.275	1.1904	1.3775
-4.7682	-64.244	-64.275	1.2749	1.4734
-4.7677	-64.246	-64.275	1.3645	1.5749
-4.7672	-64.247	-64.275	1.4596	1.6825
-4.7667	-64.259	-64.275	1.5603	1.7963
-4.7662	-64.271	-64.277	1.667	1.9166
-4.7657	-64.283	-64.288	1.7799	2.0438
-4.7652	-64.292	-64.297	1.8993	2.1781
-4.7647	-64.302	-64.305	2.0255	2.3198
-4.7642	-64.314	-64.314	2.1587	2.4693
-4.7637	-64.329	-64.336	2.2993	2.6268
-4.7632	-64.355	-64.354	2.4476	2.7926
-4.7627	-64.419	-64.424	2.6039	2.9671
-4.7622	-64.492	-64.497	2.7686	3.1507
-4.7617	-64.549	-64.565	2.9418	3.3435
-4.7612	-64.549	-64.568	3.124	3.5461
-4.7607	-64.549	-64.568	3.3155	3.7586
-4.7602	-64.549	-64.568	3.5165	3.9815
-4.7597	-64.549	-64.568	3.7276	4.215
-4.7592	-64.549	-64.568	3.9489	4.4595
-4.7587	-64.549	-64.568	4.1808	4.7154
-4.7582	-64.549	-64.568	4.4237	4.9829
-4.7577	-64.549	-64.568	4.6778	5.2625
-4.7572	-64.549	-64.568	4.9436	5.5544
-4.7567	-64.545	-64.577	5.2213	5.8589
-4.7562	-64.545	-64.585	5.5113	6.1765
-4.7557	-64.545	-64.585	5.8139	6.5073
-4.7552	-64.545	-64.585	6.1295	6.8517
-4.7547	-64.545	-64.585	6.4582	7.2099
-4.7542	-64.545	-64.585	6.8005	7.5824
-4.7537	-64.545	-64.585	7.1566	7.9692
-4.7532	-64.545	-64.585	7.5268	8.3708
-4.7527	-64.545	-64.585	7.9114	8.7873
-4.7522	-64.545	-64.585	8.3107	9.2189
-4.7517	-64.554	-64.585	8.7248	9.666
-4.7512	-64.61	-64.641	9.1541	10.129
-4.7507	-64.611	-64.652	9.5986	10.607
-4.7502	-64.617	-64.652	10.059	11.101
-4.7497	-64.638	-64.668	10.535	11.612
-4.7492	-64.66	-64.687	11.026	12.138
-4.7487	-64.681	-64.703	11.534	12.681
-4.7482	-64.702	-64.712	12.058	13.24
-4.7477	-64.722	-64.723	12.598	13.815
-4.7472	-64.739	-64.735	13.154	14.407
-4.7467	-64.742	-64.741	13.727	15.015
-4.7462	-64.742	-64.741	14.316	15.639
-4.7457	-64.742	-64.741	14.921	16.279
-4.7452	-64.745	-64.741	15.542	16.936
-4.7447	-64.753	-64.741	16.18	17.608
-4.7442	-64.753	-64.737	16.834	18.296
-4.7437	-64.753	-64.725	17.503	18.999
-4.7432	-64.753	-64.724	18.188	19.718
-4.7427	-64.753	-64.724	18.889	20.451
-4.7422	-64.756	-64.73	19.605	21.199
-4.7417	-64.781	-64.741	20.335	21.961
-4.7412	-64.81	-64.75	21.081	22.737
-4.7407	-64.824	-64.757	21.84	23.526
-4.7402	-64.824	-64.757	22.614	24.328
-4.7397	-64.824	-64.757	23.4	25.143
-4.7392	-64.824	-64.757	24.2	25.968
-4.7387	-64.824	-64.75	25.011	26.805
-4.7382	-64.824	-64.723	25.835	27.652
-4.7377	-64.798	-64.701	26.669	28.509
-4.7372	-64.739	-64.677	27.514	29.375
-4.7367	-64.68	-64.622	28.369	30.249
-4.7362	-64.68	-64.622	29.232	31.13
-4.7357	-64.648	-64.57	30.104	32.017
-4.7352	-64.48	-64.411	30.983	32.91
-4.7347	-64.453	-64.379	31.869	33.808
-4.7342	-64.359	-64.274	32.761	34.709
-4.7337	-64.247	-64.121	33.657	35.613
-4.7332	-64.224	-64.083	34.557	36.519
-4.7327	-63.813	-63.668	35.46	37.425
-4.7322	-63.575	-63.425	36.364	38.331
-4.7317	-63.376	-63.142	37.27	39.235
-4.7312	-63.075	-63.012	38.175	40.136
-4.7307	-63.031	-62.993	39.078	41.034
-4.7302	-62.953	-62.905	39.979	41.926
-4.7297	-62.861	-62.819	40.876	42.812
-4.7292	-62.765	-62.72	41.768	43.69
-4.7287	-62.651	-62.625	42.654	44.56
-4.7282	-62.545	-62.55	43.533	45.42
-4.7277	-62.438	-62.313	44.403	46.269
-4.7272	-62.397	-62.165	45.264	47.105
-4.7267	-62.337	-62.124	46.113	47.928
-4.7262	-62.207	-62.02	46.951	48.736
-4.7257	-62.057	-61.88	47.775	49.527
-4.7252	-61.908	-61.739	48.584	50.306
-4.7247	-61.746	-61.547	49.378	51.063
-4.7242	-61.571	-61.347	50.154	51.799
-4.7237	-61.414	-61.153	50.912	52.515
-4.7232	-61.3	-61.006	51.651	53.209
-4.7227	-61.143	-60.841	52.368	53.88
-4.7222	-61.021	-60.696	53.069	54.527
-4.7217	-60.913	-60.501	53.743	55.149
-4.7212	-60.364	-59.855	54.392	55.748
-4.7207	-59.919	-59.388	55.017	56.317
-4.7202	-59.662	-59.119	55.616	56.857
-4.7197	-59.567	-58.945	56.187	57.368
-4.7192	-59.508	-58.744	56.73	57.85
-4.7187	-59.388	-58.632	57.245	58.3
-4.7182	-59.295	-56.656	57.73	58.719
-4.7177	-59.183	-56.515	58.184	59.106
-4.7172	-57.658	-55.712	58.606	59.46
-4.7167	-55.547	-55.284	58.997	59.781
-4.7162	-55.046	-54.509	59.354	60.067
-4.7157	-54.685	-54.358	59.678	60.319
-4.7152	-54.108	-54.358	59.969	60.537
-4.7147	-54.108	-53.879	60.224	60.718
-4.7142	-54.108	-53.056	60.445	60.865
-4.7137	-53.765	-52.411	60.631	60.975
-4.7132	-53.147	-52.411	60.78	61.05
-4.7127	-52.939	-53.056	60.894	61.088
-4.7122	-52.939	-53.657	60.972	61.091
-4.7117	-53.39	-54.26	61.014	61.057
-4.7112	-53.872	-54.414	61.019	60.987
-4.7107	-54.328	-53.717	60.989	60.882
-4.7102	-54.69	-53.599	60.922	60.741
-4.7097	-54.333	-54.16	60.819	60.565
-4.7092	-54.144	-54.717	60.68	60.354
-4.7087	-54.144	-54.827	60.506	60.109
-4.7082	-54.5	-54.827	60.297	59.83
-4.7077	-54.909	-54.914	60.053	59.517
-4.7072	-55.012	-55.349	59.774	59.172
-4.7067	-55.169	-55.524	59.462	58.794
-4.7062	-55.677	-56.312	59.117	58.386
-4.7057	-56.053	-56.924	58.739	57.947
-4.7052	-56.561	-57.102	58.329	57.478
-4.7047	-57.251	-57.675	57.888	56.981
-4.7042	-57.596	-58.234	57.417	56.455
-4.7037	-57.918	-58.606	56.916	55.903
-4.7032	-58.151	-58.867	56.387	55.325
-4.7027	-58.373	-59.358	55.831	54.723
-4.7022	-58.558	-59.768	55.248	54.097
-4.7017	-59.148	-60.294	54.639	53.449
-4.7012	-59.548	-60.475	54.006	52.779
-4.7007	-60.207	-60.701	53.35	52.09
-4.7002	-60.609	-60.701	52.671	51.381
-4.6997	-60.609	-60.701	51.971	50.656
-4.6992	-60.609	-60.701	51.252	49.914
-4.6987	-60.609	-60.701	50.514	49.157
-4.6982	-60.609	-60.701	49.758	48.387
-4.6977	-60.609	-60.701	48.987	47.604
-4.6972	-60.675	-60.701	48.2	46.811
-4.6967	-60.79	-60.701	47.4	46.008
-4.6962	-60.84	-60.701	46.587	45.197
-4.6957	-60.918	-60.757	45.764	44.379
-4.6952	-61.006	-60.757	44.931	43.556
-4.6947	-61.123	-60.757	44.089	42.729
-4.6942	-61.172	-60.757	43.24	41.899
-4.6937	-61.172	-60.757	42.386	41.067
-4.6932	-61.172	-60.757	41.526	40.235
-4.6927	-61.172	-60.757	40.664	39.405
-4.6922	-61.172	-60.757	39.799	38.577
-4.6917	-61.172	-60.757	38.933	37.752
-4.6912	-61.172	-60.757	38.068	36.932
-4.6907	-61.341	-60.996	37.204	36.119
-4.6902	-61.53	-61.372	36.342	35.312
-4.6897	-61.53	-61.372	35.485	34.514
-4.6892	-61.53	-61.372	34.632	33.726
-4.6887	-61.53	-61.372	33.785	32.947
-4.6882	-61.537	-61.372	32.945	32.181
-4.6877	-61.558	-61.413	32.113	31.427
-4.6872	-61.578	-61.491	31.29	30.686
-4.6867	-61.639	-61.508	30.476	29.96
-4.6862	-61.787	-61.62	29.674	29.249
-4.6857	-61.939	-61.777	28.882	28.554
-4.6852	-62.016	-61.814	28.104	27.876
-4.6847	-62.022	-61.855	27.338	27.216
-4.6842	-62.022	-61.841	26.586	26.573
-4.6837	-61.97	-61.799	25.849	25.95
-4.6832	-61.824	-61.663	25.127	25.347
-4.6827	-61.757	-61.529	24.421	24.763
-4.6822	-61.734	-61.495	23.731	24.2
-4.6817	-61.724	-61.44	23.058	23.658
-4.6812	-61.724	-61.404	22.402	23.138
-4.6807	-61.724	-61.386	21.764	22.639
-4.6802	-61.727	-61.379	21.144	22.163
-4.6797	-61.759	-61.417	20.543	21.709
-4.6792	-61.796	-61.539	19.96	21.278
-4.6787	-61.923	-61.677	19.397	20.869
-4.6782	-62.011	-61.8	18.852	20.484
-4.6777	-62.045	-61.855	18.327	20.122
-4.6772	-62.114	-61.945	17.822	19.782
-4.6767	-62.098	-61.828	17.336	19.466
-4.6762	-61.931	-61.629	16.87	19.173
-4.6757	-61.791	-61.463	16.424	18.903
-4.6752	-61.752	-61.394	15.997	18.656
-4.6747	-61.722	-61.356	15.591	18.431
-4.6742	-61.655	-61.315	15.203	18.229
-4.6737	-61.664	-61.315	14.835	18.05
-4.6732	-61.724	-61.358	14.486	17.892
-4.6727	-61.724	-61.382	14.157	17.755
-4.6722	-61.698	-61.431	13.846	17.641
-4.6717	-61.698	-61.431	13.554	17.546
-4.6712	-61.698	-61.431	13.28	17.473
-4.6707	-61.698	-61.431	13.025	17.419
-4.6702	-61.653	-61.379	12.787	17.385
-4.6697	-61.488	-61.234	12.566	17.37
-4.6692	-61.399	-61.141	12.363	17.373
-4.6687	-61.261	-60.95	12.176	17.394
-4.6682	-61.026	-60.681	12.005	17.433
-4.6677	-60.785	-60.386	11.85	17.488
-4.6672	-60.785	-60.375	11.711	17.559
-4.6667	-60.785	-60.375	11.586	17.645
-4.6662	-60.785	-60.393	11.476	17.746
-4.6657	-60.947	-60.668	11.379	17.861
-4.6652	-61.166	-60.821	11.296	17.989
-4.6647	-61.185	-60.821	11.226	18.129
-4.6642	-61.146	-60.817	11.168	18.281
-4.6637	-61.132	-60.817	11.122	18.444
-4.6632	-61.132	-60.817	11.086	18.617
-4.6627	-61.132	-60.817	11.062	18.799
-4.6622	-61.132	-60.817	11.048	18.99
-4.6617	-61.132	-60.817	11.043	19.189
-4.6612	-61.176	-60.821	11.047	19.394
-4.6607	-61.207	-60.841	11.06	19.605
-4.6602	-61.232	-60.938	11.08	19.822
-4.6597	-61.271	-61.125	11.107	20.043
-4.6592	-61.314	-61.188	11.142	20.267
-4.6587	-61.427	-61.225	11.182	20.494
-4.6582	-61.555	-61.306	11.228	20.724
-4.6577	-61.647	-61.408	11.278	20.954
-4.6572	-62.074	-62.057	11.333	21.184
-4.6567	-62.728	-62.773	11.392	21.414
-4.6562	-63.309	-63.404	11.454	21.643
-4.6557	-63.607	-63.685	11.519	21.87
-4.6552	-63.607	-63.685	11.586	22.094
-4.6547	-63.607	-63.685	11.655	22.314
-4.6542	-63.607	-63.685	11.725	22.53
-4.6537	-63.607	-63.685	11.795	22.741
-4.6532	-63.607	-63.685	11.866	22.947
-4.6527	-63.607	-63.685	11.936	23.146
-4.6522	-63.607	-63.685	12.006	23.338
-4.6517	-63.607	-63.685	12.075	23.522
-4.6512	-63.607	-63.685	12.141	23.698
-4.6507	-63.077	-62.946	12.206	23.865
-4.6502	-61.945	-61.526	12.268	24.023
-4.6497	-61.713	-61.319	12.327	24.17
-4.6492	-61.18	-60.781	12.383	24.308
-4.6487	-60.28	-59.378	12.436	24.434
-4.6482	-59.434	-58.371	12.485	24.549
-4.6477	-58.473	-57.059	12.529	24.652
-4.6472	-57.718	-56.872	12.569	24.744
-4.6467	-57.573	-56.872	12.604	24.822
-4.6462	-57.344	-56.387	12.633	24.888
-4.6457	-57.215	-55.741	12.658	24.941
-4.6452	-57.045	-55.291	12.677	24.98
-4.6447	-56.968	-55.291	12.69	25.006
-4.6442	-56.968	-55.291	12.697	25.018
-4.6437	-56.968	-55.291	12.699	25.016
-4.6432	-56.968	-55.291	12.694	25
-4.6427	-56.968	-55.291	12.682	24.97
-4.6422	-56.968	-55.291	12.664	24.926
-4.6417	-57.018	-55.64	12.64	24.867
-4.6412	-57.229	-56.461	12.609	24.795
-4.6407	-57.364	-57.316	12.571	24.708
-4.6402	-57.576	-58.064	12.527	24.607
-4.6397	-57.725	-58.597	12.476	24.492
-4.6392	-58.524	-59.021	12.418	24.364
-4.6387	-59.428	-59.785	12.354	24.221
-4.6382	-60.178	-60.742	12.283	24.066
-4.6377	-60.585	-61.093	12.206	23.893
-4.6372	-60.667	-61.147	12.121	23.712
-4.6367	-60.722	-61.237	12.027	23.517
-4.6362	-60.787	-61.399	11.931	23.311
-4.6357	-61.164	-61.431	11.828	23.092
-4.6352	-61.164	-61.431	11.72	22.857
-4.6347	-61.164	-61.431	11.606	22.616
-4.6342	-61.164	-61.431	11.481	22.363
-4.6337	-61.354	-61.48	11.356	22.1
-4.6332	-61.54	-61.723	11.225	21.826
-4.6327	-61.54	-61.723	11.089	21.543
-4.6322	-61.54	-61.723	10.949	21.247
-4.6317	-61.613	-61.797	10.803	20.946
-4.6312	-61.725	-61.901	10.649	20.636
-4.6307	-61.806	-62.141	10.495	20.319
-4.6302	-61.881	-62.154	10.336	19.994
-4.6297	-61.781	-62.074	10.174	19.659
-4.6292	-61.75	-62.045	10.008	19.321
-4.6287	-61.727	-61.93	9.8353	18.978
-4.6282	-61.626	-61.841	9.6634	18.629
-4.6277	-61.525	-61.698	9.4887	18.275
-4.6272	-61.431	-61.546	9.3113	17.917
-4.6267	-61.335	-61.404	9.1316	17.555
-4.6262	-61.248	-61.277	8.9498	17.186
-4.6257	-61.18	-61.224	8.7661	16.818
-4.6252	-61.18	-61.224	8.5809	16.448
-4.6247	-61.18	-61.224	8.3905	16.077
-4.6242	-61.18	-61.224	8.2033	15.704
-4.6237	-60.944	-61.131	8.0152	15.33
-4.6232	-60.397	-60.78	7.8266	14.956
-4.6227	-60.172	-60.527	7.6377	14.581
-4.6222	-60.14	-60.426	7.4486	14.208
-4.6217	-59.973	-60.237	7.2597	13.835
-4.6212	-59.826	-60.032	7.0712	13.464
-4.6207	-59.702	-59.774	6.8833	13.095
-4.6202	-59.652	-59.736	6.6961	12.728
-4.6197	-59.614	-59.702	6.51	12.364
-4.6192	-59.551	-59.585	6.3251	12.002
-4.6187	-59.446	-59.485	6.1417	11.644
-4.6182	-59.412	-59.449	5.9598	11.29
-4.6177	-59.378	-59.404	5.7797	10.94
-4.6172	-59.39	-59.43	5.6015	10.594
-4.6167	-59.407	-59.439	5.4254	10.252
-4.6162	-59.378	-59.41	5.2516	9.9158
-4.6157	-59.355	-59.382	5.0802	9.5844
-4.6152	-59.335	-59.351	4.9113	9.2584
-4.6147	-59.335	-59.374	4.745	8.9378
-4.6142	-59.325	-59.332	4.5815	8.6231
-4.6137	-59.303	-59.302	4.4209	8.3143
-4.6132	-59.303	-59.302	4.2632	8.0116
-4.6127	-59.303	-59.302	4.1086	7.7151
-4.6122	-59.303	-59.302	3.9572	7.425
-4.6117	-59.319	-59.332	3.8089	7.1414
-4.6112	-59.336	-59.383	3.6639	6.8644
-4.6107	-59.362	-59.424	3.5222	6.5941
-4.6102	-59.399	-59.453	3.3839	6.3304
-4.6097	-59.44	-59.479	3.249	6.0736
-4.6092	-59.509	-59.511	3.1175	5.8236
-4.6087	-59.563	-59.596	2.9895	5.5804
-4.6082	-60.18	-60.476	2.8649	5.344
-4.6077	-60.862	-61.285	2.7438	5.1145
-4.6072	-61.653	-62.196	2.6262	4.8919
-4.6067	-62.263	-62.691	2.512	4.676
-4.6062	-62.317	-62.744	2.4014	4.4669
-4.6057	-62.4	-62.796	2.2941	4.2645
-4.6052	-62.455	-62.884	2.1903	4.0687
-4.6047	-62.485	-62.918	2.0899	3.8796
-4.6042	-62.485	-62.918	1.9928	3.6969
-4.6037	-62.485	-62.918	1.899	3.5207
-4.6032	-62.485	-62.918	1.8086	3.3508
-4.6027	-62.485	-62.918	1.7213	3.1871
-4.6022	-62.485	-62.918	1.6373	3.0295
-4.6017	-62.485	-62.902	1.5564	2.878
-4.6012	-62.425	-62.812	1.4785	2.7323
-4.6007	-62.364	-62.751	1.4037	2.5924
-4.6002	-62.293	-62.705	1.3318	2.4582
-4.5997	-62.129	-62.36	1.2628	2.3294
-4.5992	-62.045	-62.352	1.1967	2.2061
-4.5987	-62.045	-62.352	1.1333	2.0879
-4.5982	-62.045	-62.352	1.0725	1.9749
-4.5977	-62.045	-62.352	1.0144	1.8668
-4.5972	-62.045	-62.352	0.9589	1.7636
-4.5967	-62.045	-62.352	0.90583	1.665
-4.5962	-62.045	-62.352	0.85516	1.571
-4.5957	-62.045	-62.352	0.80682	1.4814
-4.5952	-62.045	-62.352	0.76074	1.396
-4.5947	-62.045	-62.357	0.71684	1.3147
-4.5942	-62.348	-62.705	0.67505	1.2374
-4.5937	-62.389	-62.835	0.6353	1.1639
-4.5932	-62.389	-62.835	0.59752	1.0941
-4.5927	-62.389	-62.835	0.56163	1.0279
-4.5922	-62.389	-62.835	0.52757	0.96505
-4.5917	-62.389	-62.835	0.49527	0.90549
-4.5912	-62.389	-62.835	0.46465	0.84908
-4.5907	-62.488	-62.863	0.43565	0.7957
-4.5902	-62.584	-62.935	0.40821	0.74521
-4.5897	-62.647	-63.006	0.38226	0.69749
-4.5892	-62.662	-63.055	0.35773	0.65243
-4.5887	-62.67	-63.082	0.33457	0.60989
-4.5882	-62.67	-63.082	0.31271	0.56978
-4.5877	-62.67	-63.082	0.2921	0.53198
-4.5872	-62.67	-63.082	0.27268	0.49638
-4.5867	-62.67	-63.082	0.25439	0.46287
-4.5862	-62.67	-63.082	0.23717	0.43136
-4.5857	-62.67	-63.113	0.22099	0.40174
-4.5852	-62.816	-63.17	0.20578	0.37393
-4.5847	-62.95	-63.334	0.19149	0.34782
-4.5842	-62.976	-63.364	0.17809	0.32334
-4.5837	-63.1	-63.502	0.16552	0.3004
-4.5832	-63.24	-63.668	0.15374	0.27891
-4.5827	-63.24	-63.679	0.14271	0.2588
-4.5822	-63.24	-63.679	0.13239	0.23999
-4.5817	-63.24	-63.679	0.12274	0.2224
-4.5812	-63.24	-63.679	0.11373	0.20598
-4.5807	-63.24	-63.679	0.1053	0.19066
-4.5802	-63.24	-63.679	0.097445	0.17636
-4.5797	-63.24	-63.679	0.090116	0.16304
-4.5792	-63.174	-63.639	0.083287	0.15063
-4.5787	-63.129	-63.578	0.076926	0.13908
-4.5782	-63.129	-63.578	0.071008	0.12833
-4.5777	-63.129	-63.578	0.065503	0.11834
-4.5772	-63.129	-63.578	0.060388	0.10906
-4.5767	-63.129	-63.578	0.055637	0.10045
-4.5762	-63.129	-63.578	0.051228	0.092457
-4.5757	-63.129	-63.578	0.047139	0.08505
-4.5752	-63.129	-63.578	0.043349	0.078187
-4.5747	-63.212	-63.668	0.039839	0.071834
-4.5742	-63.331	-63.823	0.03659	0.065956
-4.5737	-63.426	-63.916	0.033586	0.060521
-4.5732	-63.773	-64.149	0.030808	0.0555
-4.5727	-63.785	-64.208	0.028243	0.050864
-4.5722	-63.835	-64.285	0.025875	0.046587
-4.5717	-63.892	-64.374	0.023691	0.042642
-4.5712	-63.919	-64.445	0.021678	0.039008
-4.5707	-64.043	-64.518	0.019823	0.035661
-4.5702	-64.332	-64.778	0.018116	0.032581
-4.5697	-64.625	-65.079	0.016545	0.029749
-4.5692	-64.905	-65.357	0.015101	0.027146
-4.5687	-65.125	-65.581	0.013775	0.024756
-4.5682	-65.125	-65.581	0.012557	0.022562
-4.5677	-65.125	-65.581	0.01144	0.020549
-4.5672	-65.125	-65.581	0.010415	0.018705
-4.5667	-65.125	-65.581	0.0094768	0.017016
-4.5662	-65.127	-65.581	0.0086174	0.015469
-4.5657	-65.199	-65.615	0.0078311	0.014055
-4.5652	-65.257	-65.656	0.007112	0.0087833
-4.5647	-65.267	-65.685	0.006455	0.0079828
-4.5642	-65.313	-65.745	0.0058549	0.0072507
-4.5637	-65.351	-65.774	0.0053074	0.0065817
-4.5632	-65.339	-65.758	0.004808	0.0059706
-4.5627	-65.28	-65.689	0.0043529	0.0054129
-4.5622	-65.26	-65.656	0	0.0049042
-4.5617	-65.217	-65.609	0	0.0044406
-4.5612	-65.135	-65.515	0	0
-4.5607	-65.088	-65.478	0	0
-4.5602	-65.086	-65.459	0	0
-4.5597	-65.086	-65.459	0	0
-4.5592	-65.086	-65.459	0	0
-4.5587	-65.086	-65.459	0	0
-4.5582	-65.093	-65.459	0	0
-4.5577	-65.093	-65.459	0	0
-4.5572	-65.093	-65.459	0	0
-4.5567	-65.083	-65.443	0	0
-4.5562	-65.049	-65.353	0	0
-4.5557	-64.969	-65.266	0	0
-4.5552	-64.897	-65.188	0	0
-4.5547	-64.85	-65.143	0	0
-4.5542	-64.778	-65.082	0	0
-4.5537	-64.701	-65	0	0
-4.5532	-64.656	-64.95	0	0
-4.5527	-64.395	-64.62	0	0
-4.5522	-63.864	-64.175	0	0
-4.5517	-63.864	-64.175	0	0
-4.5512	-63.864	-64.175	0	0
-4.5507	-63.864	-64.175	0	0
-4.5502	-63.864	-64.175	0	0
-4.5497	-63.864	-64.175	0	0
-4.5492	-63.864	-64.175	0	0
-4.5487	-63.864	-64.175	0	0
-4.5482	-63.864	-64.175	0	0
-4.5477	-63.864	-64.175	0	0
-4.5472	-63.886	-64.262	0	0
-4.5467	-64.119	-64.533	0	0
-4.5462	-64.349	-64.778	0	0
-4.5457	-64.564	-64.998	0	0
-4.5452	-64.762	-65.198	0	0
-4.5447	-64.943	-65.379	0	0
-4.5442	-65.109	-65.543	0	0
-4.5437	-65.26	-65.691	0	0
-4.5432	-65.397	-65.824	0	0
-4.5427	-65.522	-65.944	0	0
-4.5422	-65.623	-66.052	0	0
-4.5417	-65.643	-66.117	0	0
-4.5412	-65.679	-66.132	0	0
-4.5407	-65.718	-66.155	0	0
-4.5402	-65.755	-66.16	0	0
-4.5397	-65.755	-66.16	0	0
-4.5392	-65.755	-66.16	0	0
-4.5387	-65.755	-66.16	0	0
-4.5382	-65.755	-66.16	0	0
-4.5377	-65.755	-66.16	0	0
-4.5372	-65.755	-66.16	0	0
-4.5367	-65.768	-66.16	0	0
-4.5362	-65.786	-66.142	0	0
-4.5357	-65.786	-66.142	0	0
-4.5352	-65.786	-66.116	0	0
-4.5347	-65.776	-66.094	0	0
-4.5342	-65.776	-66.094	0	0
-4.5337	-65.776	-66.094	0	0
-4.5332	-65.753	-66.086	0	0
-4.5327	-65.733	-66.059	0	0
-4.5322	-65.717	-66.041	0	0
-4.5317	-65.698	-66.026	0	0
-4.5312	-65.682	-66.012	0	0
-4.5307	-65.667	-65.999	0	0
-4.5302	-65.666	-66.004	0	0
-4.5297	-65.673	-66.017	0	0
-4.5292	-65.688	-66.029	0	0
-4.5287	-65.701	-66.039	0	0
-4.5282	-65.723	-66.057	0	0
-4.5277	-65.736	-66.067	0	0
-4.5272	-65.754	-66.08	0	0
-4.5267	-65.77	-66.087	0	0
-4.5262	-65.779	-66.092	0	0
-4.5257	-65.809	-66.106	0	0
-4.5252	-65.817	-66.124	0	0
-4.5247	-65.83	-66.143	0	0
-4.5242	-65.837	-66.149	0	0
-4.5237	-65.845	-66.151	0	0
-4.5232	-65.87	-66.183	0	0
-4.5227	-65.878	-66.212	0	0
-4.5222	-65.878	-66.212	0	0
-4.5217	-65.878	-66.212	0	0
-4.5212	-65.878	-66.212	0	0
-4.5207	-65.878	-66.212	0	0
-4.5202	-65.878	-66.212	0	0
-4.5197	-65.878	-66.212	0	0
-4.5192	-65.865	-66.204	0	0
-4.5187	-65.863	-66.204	0	0
-4.5182	-65.863	-66.204	0	0
-4.5177	-65.812	-66.204	0	0
-4.5172	-65.713	-66.075	0	0
-4.5167	-65.523	-65.786	0	0
-4.5162	-65.07	-65.361	0	0
-4.5157	-64.357	-64.693	0	0
-4.5152	-63.399	-63.863	0	0
-4.5147	-62.98	-63.432	0	0
-4.5142	-62.98	-63.43	0	0
-4.5137	-62.98	-63.43	0	0
-4.5132	-62.98	-63.43	0	0
-4.5127	-62.98	-63.43	0	0
-4.5122	-62.98	-63.43	0	0
-4.5117	-62.973	-63.43	0	0
-4.5112	-62.92	-63.43	0	0
-4.5107	-62.871	-63.43	0	0
-4.5102	-62.841	-63.43	0	0
-4.5097	-62.857	-63.442	0	0
-4.5092	-62.913	-63.475	0	0
-4.5087	-62.946	-63.522	0	0
-4.5082	-62.998	-63.541	0	0
-4.5077	-63.045	-63.598	0	0
-4.5072	-63.132	-63.693	0	0
-4.5067	-63.221	-63.798	0	0
-4.5062	-63.255	-63.848	0	0
-4.5057	-63.307	-63.896	0	0
-4.5052	-63.364	-63.953	0	0
-4.5047	-63.417	-64.013	0	0
-4.5042	-63.453	-64.071	0	0
-4.5037	-63.466	-64.102	0	0
-4.5032	-63.475	-64.132	0	0
-4.5027	-63.475	-64.133	0	0
-4.5022	-63.493	-64.149	0	0
-4.5017	-63.505	-64.186	0	0
-4.5012	-63.661	-64.29	0	0
-4.5007	-63.719	-64.322	0	0
-4.5002	-63.76	-64.346	0	0
-4.4997	-63.835	-64.463	0	0
-4.4992	-63.942	-64.55	0	0
-4.4987	-63.942	-64.55	0	0
-4.4982	-63.952	-64.55	0	0
-4.4977	-64.018	-64.589	0	0
-4.4972	-64.087	-64.65	0	0
-4.4967	-64.118	-64.681	0	0
-4.4962	-64.142	-64.703	0	0
-4.4957	-64.153	-64.728	0	0
-4.4952	-64.169	-64.759	0	0
-4.4947	-64.197	-64.775	0	0
-4.4942	-64.203	-64.778	0	0
-4.4937	-64.203	-64.778	0	0
-4.4932	-64.203	-64.778	0	0
-4.4927	-64.191	-64.726	0	0
-4.4922	-64.16	-64.699	0	0
-4.4917	-64.143	-64.679	0	0
-4.4912	-64.083	-64.628	0	0
-4.4907	-63.99	-64.558	0	0
-4.4902	-63.964	-64.526	0	0
-4.4897	-63.935	-64.485	0	0
-4.4892	-63.936	-64.496	0	0
-4.4887	-63.965	-64.535	0	0
-4.4882	-63.994	-64.559	0	0
-4.4877	-64.017	-64.611	0	0
-4.4872	-64.017	-64.611	0	0
-4.4867	-64.017	-64.611	0	0
-4.4862	-64.017	-64.611	0	0
-4.4857	-64.017	-64.611	0	0
-4.4852	-64.017	-64.611	0	0
-4.4847	-64.017	-64.611	0	0
-4.4842	-64.069	-64.656	0	0
-4.4837	-64.171	-64.738	0	0
-4.4832	-64.201	-64.771	0	0
-4.4827	-64.316	-64.892	0	0
-4.4822	-64.47	-65.03	0	0
-4.4817	-64.604	-65.159	0	0
-4.4812	-64.636	-65.277	0	0
-4.4807	-64.688	-65.32	0	0
-4.4802	-64.745	-65.337	0	0
-4.4797	-64.767	-65.351	0	0
-4.4792	-64.79	-65.37	0	0
-4.4787	-64.816	-65.381	0	0
-4.4782	-64.84	-65.398	0	0
-4.4777	-64.873	-65.415	0	0
-4.4772	-64.911	-65.441	0	0
-4.4767	-64.961	-65.508	0	0
-4.4762	-65.052	-65.592	0	0
-4.4757	-65.12	-65.643	0	0
-4.4752	-65.133	-65.658	0	0
-4.4747	-65.15	-65.68	0	0
-4.4742	-65.15	-65.683	0	0
-4.4737	-65.15	-65.683	0	0
-4.4732	-65.157	-65.685	0	0
-4.4727	-65.176	-65.702	0	0
-4.4722	-65.196	-65.717	0	0
-4.4717	-65.228	-65.74	0	0
-4.4712	-65.261	-65.769	0	0
-4.4707	-65.294	-65.797	0	0
-4.4702	-65.326	-65.826	0	0
-4.4697	-65.327	-65.827	0	0
-4.4692	-65.327	-65.827	0	0
-4.4687	-65.327	-65.827	0	0
-4.4682	-65.345	-65.832	0	0
-4.4677	-65.365	-65.851	0	0
-4.4672	-65.365	-65.851	0	0
-4.4667	-65.365	-65.851	0	0
-4.4662	-65.365	-65.851	0	0
-4.4657	-65.348	-65.837	0	0
-4.4652	-65.318	-65.81	0	0
-4.4647	-65.304	-65.791	0	0
-4.4642	-65.304	-65.791	0	0
-4.4637	-65.304	-65.791	0	0
-4.4632	-65.304	-65.791	0	0
-4.4627	-65.304	-65.791	0	0
-4.4622	-65.289	-65.766	0	0
-4.4617	-65.227	-65.716	0	0
-4.4612	-65.177	-65.678	0	0
-4.4607	-65.152	-65.648	0	0
-4.4602	-64.972	-65.367	0	0
-4.4597	-64.732	-65.129	0	0
-4.4592	-64.732	-65.124	0	0
-4.4587	-64.732	-65.121	0	0
-4.4582	-64.732	-65.121	0	0
-4.4577	-64.732	-65.121	0	0
-4.4572	-64.732	-65.121	0	0
-4.4567	-64.732	-65.121	0	0
-4.4562	-64.732	-65.121	0	0
-4.4557	-64.732	-65.121	0	0
-4.4552	-64.732	-65.121	0	0
-4.4547	-64.748	-65.135	0	0
-4.4542	-64.782	-65.174	0	0
-4.4537	-64.824	-65.218	0	0
-4.4532	-64.906	-65.231	0	0
-4.4527	-64.925	-65.264	0	0
-4.4522	-64.935	-65.275	0	0
-4.4517	-64.935	-65.275	0	0
-4.4512	-64.935	-65.275	0	0
-4.4507	-64.935	-65.275	0	0
-4.4502	-64.935	-65.275	0	0
-4.4497	-64.935	-65.275	0	0
-4.4492	-64.935	-65.275	0	0
-4.4487	-64.935	-65.275	0	0
-4.4482	-64.954	-65.282	0	0
-4.4477	-64.966	-65.282	0	0
-4.4472	-64.966	-65.281	0	0
-4.4467	-64.944	-65.253	0	0
-4.4462	-64.919	-65.232	0	0
-4.4457	-64.905	-65.218	0	0
-4.4452	-64.889	-65.197	0	0
-4.4447	-64.871	-65.182	0	0
-4.4442	-64.86	-65.173	0	0
-4.4437	-64.859	-65.173	0	0
-4.4432	-64.859	-65.173	0	0
-4.4427	-64.859	-65.173	0	0
-4.4422	-64.861	-65.173	0	0
-4.4417	-64.861	-65.183	0	0
-4.4412	-64.871	-65.203	0	0
-4.4407	-64.883	-65.225	0	0
-4.4402	-64.885	-65.239	0	0
-4.4397	-64.886	-65.255	0	0
-4.4392	-64.902	-65.275	0	0
-4.4387	-64.918	-65.288	0	0
-4.4382	-64.918	-65.294	0	0
-4.4377	-64.918	-65.294	0	0
-4.4372	-64.918	-65.295	0	0
-4.4367	-64.934	-65.307	0	0
-4.4362	-64.96	-65.323	0	0
-4.4357	-64.982	-65.338	0	0
-4.4352	-65.019	-65.362	0	0
-4.4347	-65.048	-65.396	0	0
-4.4342	-65.067	-65.408	0	0
-4.4337	-65.078	-65.408	0	0
-4.4332	-65.078	-65.408	0	0
-4.4327	-65.076	-65.398	0	0
-4.4322	-65.076	-65.398	0	0
-4.4317	-65.08	-65.415	0	0
-4.4312	-65.083	-65.425	0	0
-4.4307	-65.083	-65.425	0	0
-4.4302	-65.083	-65.425	0	0
-4.4297	-65.083	-65.425	0	0
-4.4292	-65.083	-65.425	0	0
-4.4287	-65.08	-65.404	0	0
-4.4282	-65.071	-65.391	0	0
-4.4277	-65.067	-65.389	0	0
-4.4272	-65.045	-65.382	0	0
-4.4267	-65.03	-65.37	0	0
-4.4262	-65.018	-65.356	0	0
-4.4257	-65.002	-65.326	0	0
-4.4252	-64.974	-65.3	0	0
-4.4247	-64.947	-65.277	0	0
-4.4242	-64.937	-65.276	0	0
-4.4237	-64.937	-65.276	0	0
-4.4232	-64.937	-65.276	0	0
-4.4227	-64.958	-65.282	0	0
-4.4222	-64.959	-65.282	0	0
-4.4217	-64.959	-65.282	0	0
-4.4212	-64.959	-65.282	0	0
-4.4207	-64.959	-65.282	0	0
-4.4202	-64.961	-65.294	0	0
-4.4197	-64.973	-65.312	0	0
-4.4192	-64.989	-65.333	0	0
-4.4187	-65.007	-65.353	0	0
-4.4182	-65.018	-65.366	0	0
-4.4177	-65.02	-65.371	0	0
-4.4172	-65.044	-65.401	0	0
-4.4167	-65.094	-65.458	0	0
-4.4162	-65.157	-65.523	0	0
-4.4157	-65.227	-65.594	0	0
-4.4152	-65.3	-65.668	0	0
-4.4147	-65.371	-65.739	0	0
-4.4142	-65.38	-65.775	0	0
-4.4137	-65.399	-65.783	0	0
-4.4132	-65.422	-65.792	0	0
-4.4127	-65.434	-65.804	0	0
-4.4122	-65.445	-65.817	0	0
-4.4117	-65.451	-65.822	0	0
-4.4112	-65.452	-65.823	0	0
-4.4107	-65.452	-65.823	0	0
-4.4102	-65.452	-65.823	0	0
-4.4097	-65.452	-65.823	0	0
-4.4092	-65.452	-65.823	0	0
-4.4087	-65.447	-65.818	0	0
-4.4082	-65.438	-65.805	0	0
-4.4077	-65.429	-65.791	0	0
-4.4072	-65.402	-65.782	0	0
-4.4067	-65.392	-65.78	0	0
-4.4062	-65.381	-65.726	0	0
-4.4057	-65.373	-65.719	0	0
-4.4052	-65.371	-65.719	0	0
-4.4047	-65.371	-65.719	0	0
-4.4042	-65.365	-65.702	0	0
-4.4037	-65.346	-65.685	0	0
-4.4032	-65.328	-65.674	0	0
-4.4027	-65.314	-65.666	0	0
-4.4022	-65.3	-65.649	0	0
-4.4017	-65.289	-65.629	0	0
-4.4012	-65.282	-65.608	0	0
-4.4007	-65.25	-65.589	0	0
-4.4002	-65.22	-65.573	0	0
-4.3997	-65.197	-65.569	0	0
-4.3992	-65.13	-65.44	0	0
-4.3987	-65.073	-65.404	0	0
-4.3982	-65.052	-65.388	0	0
-4.3977	-65.052	-65.388	0	0
-4.3972	-65.048	-65.381	0	0
-4.3967	-65.03	-65.358	0	0
-4.3962	-65.028	-65.355	0	0
-4.3957	-65.028	-65.355	0	0
-4.3952	-65.028	-65.355	0	0
-4.3947	-65.028	-65.355	0	0
-4.3942	-65.028	-65.355	0	0
-4.3937	-65.035	-65.372	0	0
-4.3932	-65.048	-65.39	0	0
-4.3927	-65.057	-65.403	0	0
-4.3922	-65.057	-65.403	0	0
-4.3917	-65.045	-65.393	0	0
-4.3912	-65.054	-65.403	0	0
-4.3907	-65.07	-65.422	0	0
-4.3902	-65.086	-65.443	0	0
-4.3897	-65.102	-65.461	0	0
-4.3892	-65.111	-65.481	0	0
-4.3887	-65.125	-65.499	0	0
-4.3882	-65.142	-65.514	0	0
-4.3877	-65.164	-65.538	0	0
-4.3872	-65.176	-65.553	0	0
-4.3867	-65.192	-65.567	0	0
-4.3862	-65.21	-65.584	0	0
-4.3857	-65.228	-65.601	0	0
-4.3852	-65.247	-65.618	0	0
-4.3847	-65.264	-65.621	0	0
-4.3842	-65.264	-65.616	0	0
-4.3837	-65.241	-65.595	0	0
-4.3832	-65.241	-65.594	0	0
-4.3827	-65.241	-65.594	0	0
-4.3822	-65.241	-65.594	0	0
-4.3817	-65.241	-65.594	0	0
-4.3812	-65.241	-65.594	0	0
-4.3807	-65.241	-65.593	0	0
-4.3802	-65.196	-65.574	0	0
-4.3797	-65.168	-65.548	0	0
-4.3792	-64.925	-65.264	0	0
-4.3787	-64.816	-65.167	0	0
-4.3782	-64.794	-65.155	0	0
-4.3777	-64.794	-65.155	0	0
-4.3772	-64.794	-65.155	0	0
-4.3767	-64.794	-65.155	0	0
-4.3762	-64.794	-65.155	0	0
-4.3757	-64.785	-65.139	0	0
-4.3752	-64.772	-65.122	0	0
-4.3747	-64.772	-65.122	0	0
-4.3742	-64.772	-65.122	0	0
-4.3737	-64.772	-65.112	0	0
-4.3732	-64.781	-65.122	0	0
-4.3727	-64.781	-65.125	0	0
-4.3722	-64.77	-65.111	0	0
-4.3717	-64.765	-65.106	0	0
-4.3712	-64.765	-65.106	0	0
-4.3707	-64.765	-65.106	0	0
-4.3702	-64.765	-65.106	0	0
-4.3697	-64.765	-65.106	0	0
-4.3692	-64.765	-65.106	0	0
-4.3687	-64.765	-65.102	0	0
-4.3682	-64.758	-65.1	0	0
-4.3677	-64.719	-65.1	0	0
-4.3672	-64.668	-65.1	0	0
-4.3667	-64.666	-65.1	0	0
-4.3662	-64.666	-65.1	0	0
-4.3657	-64.666	-65.105	0	0
-4.3652	-64.666	-65.122	0	0
-4.3647	-64.666	-65.122	0	0
-4.3642	-64.666	-65.122	0	0
-4.3637	-64.666	-65.155	0	0
-4.3632	-64.666	-65.161	0	0
-4.3627	-64.683	-65.177	0	0
-4.3622	-64.714	-65.204	0	0
-4.3617	-64.745	-65.238	0	0
-4.3612	-64.81	-65.326	0	0
-4.3607	-64.898	-65.416	0	0
-4.3602	-64.986	-65.501	0	0
-4.3597	-65.057	-65.579	0	0
-4.3592	-65.073	-65.637	0	0
-4.3587	-65.093	-65.64	0	0
-4.3582	-65.093	-65.64	0	0
-4.3577	-65.093	-65.64	0	0
-4.3572	-65.093	-65.64	0	0
-4.3567	-65.093	-65.64	0	0
-4.3562	-65.093	-65.64	0	0
-4.3557	-65.093	-65.64	0	0
-4.3552	-65.093	-65.64	0	0
-4.3547	-65.093	-65.64	0	0
-4.3542	-65.07	-65.639	0	0
-4.3537	-65.003	-65.488	0	0
-4.3532	-64.952	-65.436	0	0
-4.3527	-64.952	-65.436	0	0
-4.3522	-64.952	-65.436	0	0
-4.3517	-64.952	-65.436	0	0
-4.3512	-64.952	-65.436	0	0
-4.3507	-64.952	-65.436	0	0
-4.3502	-64.952	-65.436	0	0
-4.3497	-64.952	-65.436	0	0
-4.3492	-64.952	-65.436	0	0
-4.3487	-64.952	-65.436	0	0
-4.3482	-65.016	-65.453	0	0
-4.3477	-65.024	-65.474	0	0
-4.3472	-65.029	-65.48	0	0
-4.3467	-65.029	-65.48	0	0
-4.3462	-65.031	-65.48	0	0
-4.3457	-65.044	-65.493	0	0
-4.3452	-65.058	-65.51	0	0
-4.3447	-65.073	-65.525	0	0
-4.3442	-65.088	-65.541	0	0
-4.3437	-65.103	-65.556	0	0
-4.3432	-65.115	-65.569	0	0
-4.3427	-65.115	-65.568	0	0
-4.3422	-65.103	-65.551	0	0
-4.3417	-65.087	-65.532	0	0
-4.3412	-65.069	-65.514	0	0
-4.3407	-65.052	-65.494	0	0
-4.3402	-65.051	-65.485	0	0
-4.3397	-65.051	-65.485	0	0
-4.3392	-65.062	-65.497	0	0
-4.3387	-65.075	-65.511	0	0
-4.3382	-65.089	-65.518	0	0
-4.3377	-65.089	-65.518	0	0
-4.3372	-65.109	-65.536	0	0
-4.3367	-65.128	-65.555	0	0
-4.3362	-65.147	-65.573	0	0
-4.3357	-65.165	-65.592	0	0
-4.3352	-65.182	-65.609	0	0
-4.3347	-65.2	-65.622	0	0
-4.3342	-65.198	-65.613	0	0
-4.3337	-65.198	-65.613	0	0
-4.3332	-65.2	-65.608	0	0
-4.3327	-65.2	-65.608	0	0
-4.3322	-65.2	-65.608	0	0
-4.3317	-65.205	-65.609	0	0
-4.3312	-65.216	-65.62	0	0
-4.3307	-65.227	-65.632	0	0
-4.3302	-65.238	-65.643	0	0
-4.3297	-65.251	-65.654	0	0
-4.3292	-65.269	-65.672	0	0
-4.3287	-65.287	-65.691	0	0
-4.3282	-65.306	-65.707	0	0
-4.3277	-65.322	-65.724	0	0
-4.3272	-65.333	-65.734	0	0
-4.3267	-65.322	-65.715	0	0
-4.3262	-65.285	-65.682	0	0
-4.3257	-65.247	-65.649	0	0
-4.3252	-65.232	-65.634	0	0
-4.3247	-65.22	-65.622	0	0
-4.3242	-65.22	-65.622	0	0
-4.3237	-65.203	-65.593	0	0
-4.3232	-65.176	-65.578	0	0
-4.3227	-65.176	-65.578	0	0
-4.3222	-65.176	-65.578	0	0
-4.3217	-65.132	-65.57	0	0
-4.3212	-64.994	-65.524	0	0
-4.3207	-64.994	-65.446	0	0
-4.3202	-64.994	-65.446	0	0
-4.3197	-64.994	-65.446	0	0
-4.3192	-64.994	-65.446	0	0
-4.3187	-64.994	-65.434	0	0
-4.3182	-64.985	-65.408	0	0
-4.3177	-64.972	-65.383	0	0
-4.3172	-64.972	-65.367	0	0
-4.3167	-64.972	-65.367	0	0
-4.3162	-64.972	-65.367	0	0
-4.3157	-64.985	-65.371	0	0
-4.3152	-64.997	-65.39	0	0
-4.3147	-65.023	-65.409	0	0
-4.3142	-65.05	-65.424	0	0
-4.3137	-65.076	-65.453	0	0
-4.3132	-65.104	-65.483	0	0
-4.3127	-65.129	-65.51	0	0
-4.3122	-65.156	-65.536	0	0
-4.3117	-65.179	-65.56	0	0
-4.3112	-65.203	-65.584	0	0
-4.3107	-65.225	-65.606	0	0
-4.3102	-65.246	-65.627	0	0
-4.3097	-65.265	-65.647	0	0
-4.3092	-65.275	-65.642	0	0
-4.3087	-65.275	-65.633	0	0
-4.3082	-65.275	-65.633	0	0
-4.3077	-65.275	-65.633	0	0
-4.3072	-65.275	-65.633	0	0
-4.3067	-65.275	-65.633	0	0
-4.3062	-65.275	-65.633	0	0
-4.3057	-65.275	-65.633	0	0
-4.3052	-65.275	-65.633	0	0
-4.3047	-65.275	-65.633	0	0
-4.3042	-65.164	-65.502	0	0
-4.3037	-64.901	-65.305	0	0
-4.3032	-64.764	-65.181	0	0
-4.3027	-64.663	-65.091	0	0
-4.3022	-64.601	-64.973	0	0
-4.3017	-64.576	-64.956	0	0
-4.3012	-64.541	-64.945	0	0
-4.3007	-64.495	-64.916	0	0
-4.3002	-64.462	-64.89	0	0
-4.2997	-64.439	-64.883	0	0
-4.2992	-64.426	-64.861	0	0
-4.2987	-64.417	-64.839	0	0
-4.2982	-64.391	-64.812	0	0
-4.2977	-64.373	-64.792	0	0
-4.2972	-64.373	-64.792	0	0
-4.2967	-64.373	-64.792	0	0
-4.2962	-64.373	-64.792	0	0
-4.2957	-64.373	-64.792	0	0
-4.2952	-64.386	-64.801	0	0
-4.2947	-64.407	-64.824	0	0
-4.2942	-64.424	-64.845	0	0
-4.2937	-64.424	-64.846	0	0
-4.2932	-64.424	-64.846	0	0
-4.2927	-64.447	-64.867	0	0
-4.2922	-64.489	-64.903	0	0
-4.2917	-64.57	-64.985	0	0
-4.2912	-64.646	-65.011	0	0
-4.2907	-64.68	-65.037	0	0
-4.2902	-64.693	-65.067	0	0
-4.2897	-64.706	-65.098	0	0
-4.2892	-64.722	-65.131	0	0
-4.2887	-64.726	-65.152	0	0
-4.2882	-64.726	-65.152	0	0
-4.2877	-64.726	-65.152	0	0
-4.2872	-64.726	-65.152	0	0
-4.2867	-64.726	-65.152	0	0
-4.2862	-64.726	-65.152	0	0
-4.2857	-64.726	-65.152	0	0
-4.2852	-64.712	-65.161	0	0
-4.2847	-64.732	-65.2	0	0
-4.2842	-64.759	-65.24	0	0
-4.2837	-64.787	-65.269	0	0
-4.2832	-64.792	-65.278	0	0
-4.2827	-64.792	-65.282	0	0
-4.2822	-64.792	-65.282	0	0
-4.2817	-64.792	-65.282	0	0
-4.2812	-64.792	-65.287	0	0
-4.2807	-64.792	-65.288	0	0
-4.2802	-64.836	-65.292	0	0
-4.2797	-64.86	-65.308	0	0
-4.2792	-64.833	-65.295	0	0
-4.2787	-64.839	-65.299	0	0
-4.2782	-64.843	-65.314	0	0
-4.2777	-64.843	-65.314	0	0
-4.2772	-64.843	-65.314	0	0
-4.2767	-64.848	-65.323	0	0
-4.2762	-64.848	-65.329	0	0
-4.2757	-64.848	-65.329	0	0
-4.2752	-64.848	-65.334	0	0
-4.2747	-64.862	-65.351	0	0
-4.2742	-64.86	-65.35	0	0
-4.2737	-64.846	-65.332	0	0
-4.2732	-64.846	-65.329	0	0
-4.2727	-64.846	-65.329	0	0
-4.2722	-64.846	-65.329	0	0
-4.2717	-64.846	-65.329	0	0
-4.2712	-64.846	-65.329	0	0
-4.2707	-64.846	-65.329	0	0
-4.2702	-64.846	-65.329	0	0
-4.2697	-64.849	-65.334	0	0
-4.2692	-64.872	-65.358	0	0
-4.2687	-64.903	-65.376	0	0
-4.2682	-64.933	-65.383	0	0
-4.2677	-64.997	-65.402	0	0
-4.2672	-65.005	-65.422	0	0
-4.2667	-65.011	-65.438	0	0
-4.2662	-65.022	-65.464	0	0
-4.2657	-65.033	-65.489	0	0
-4.2652	-65.047	-65.503	0	0
-4.2647	-65.061	-65.511	0	0
-4.2642	-65.075	-65.522	0	0
-4.2637	-65.089	-65.534	0	0
-4.2632	-65.104	-65.548	0	0
-4.2627	-65.119	-65.562	0	0
-4.2622	-65.133	-65.576	0	0
-4.2617	-65.154	-65.597	0	0
-4.2612	-65.174	-65.6	0	0
-4.2607	-65.202	-65.639	0	0
-4.2602	-65.216	-65.646	0	0
-4.2597	-65.234	-65.659	0	0
-4.2592	-65.254	-65.675	0	0
-4.2587	-65.276	-65.693	0	0
-4.2582	-65.295	-65.711	0	0
-4.2577	-65.314	-65.727	0	0
-4.2572	-65.332	-65.743	0	0
-4.2567	-65.348	-65.76	0	0
-4.2562	-65.376	-65.787	0	0
-4.2557	-65.401	-65.809	0	0
-4.2552	-65.413	-65.816	0	0
-4.2547	-65.413	-65.816	0	0
-4.2542	-65.413	-65.816	0	0
-4.2537	-65.413	-65.816	0	0
-4.2532	-65.413	-65.816	0	0
-4.2527	-65.413	-65.816	0	0
-4.2522	-65.413	-65.816	0	0
-4.2517	-65.413	-65.816	0	0
-4.2512	-65.413	-65.816	0	0
-4.2507	-65.413	-65.816	0	0
-4.2502	-65.383	-65.761	0	0
-4.2497	-65.356	-65.731	0	0
-4.2492	-65.331	-65.703	0	0
-4.2487	-65.315	-65.683	0	0
-4.2482	-65.268	-65.646	0	0
-4.2477	-65.243	-65.593	0	0
-4.2472	-65.174	-65.549	0	0
-4.2467	-65.142	-65.52	0	0
-4.2462	-65.108	-65.484	0	0
-4.2457	-65.071	-65.446	0	0
-4.2452	-65.033	-65.407	0	0
-4.2447	-64.992	-65.365	0	0
-4.2442	-64.953	-65.32	0	0
-4.2437	-64.92	-65.278	0	0
-4.2432	-64.903	-65.248	0	0
-4.2427	-64.842	-65.23	0	0
-4.2422	-64.831	-65.218	0	0
-4.2417	-64.688	-65.047	0	0
-4.2412	-64.688	-65.047	0	0
-4.2407	-64.688	-65.047	0	0
-4.2402	-64.688	-65.047	0	0
-4.2397	-64.688	-65.047	0	0
-4.2392	-64.688	-65.047	0	0
-4.2387	-64.688	-65.047	0	0
-4.2382	-64.688	-65.047	0	0
-4.2377	-64.688	-65.047	0	0
-4.2372	-64.674	-65.039	0	0
-4.2367	-64.643	-65.009	0	0
-4.2362	-64.643	-65.009	0	0
-4.2357	-64.646	-65.026	0	0
-4.2352	-64.646	-65.026	0	0
-4.2347	-64.646	-65.026	0	0
-4.2342	-64.646	-65.026	0	0
-4.2337	-64.646	-65.026	0	0
-4.2332	-64.645	-65.026	0	0
-4.2327	-64.664	-65.039	0	0
-4.2322	-64.697	-65.066	0	0
-4.2317	-64.712	-65.075	0	0
-4.2312	-64.713	-65.075	0	0
-4.2307	-64.713	-65.074	0	0
-4.2302	-64.71	-65.065	0	0
-4.2297	-64.701	-65.053	0	0
-4.2292	-64.701	-65.053	0	0
-4.2287	-64.701	-65.053	0	0
-4.2282	-64.701	-65.053	0	0
-4.2277	-64.701	-65.053	0	0
-4.2272	-64.71	-65.059	0	0
-4.2267	-64.736	-65.09	0	0
-4.2262	-64.736	-65.101	0	0
-4.2257	-64.736	-65.101	0	0
-4.2252	-64.736	-65.101	0	0
-4.2247	-64.736	-65.101	0	0
-4.2242	-64.736	-65.101	0	0
-4.2237	-64.736	-65.101	0	0
-4.2232	-64.736	-65.101	0	0
-4.2227	-64.736	-65.1	0	0
-4.2222	-64.704	-65.059	0	0
-4.2217	-64.687	-65.036	0	0
-4.2212	-64.642	-65.036	0	0
-4.2207	-64.599	-65.015	0	0
-4.2202	-64.569	-64.968	0	0
-4.2197	-64.553	-64.945	0	0
-4.2192	-64.537	-64.925	0	0
-4.2187	-64.512	-64.908	0	0
-4.2182	-64.484	-64.883	0	0
-4.2177	-64.466	-64.864	0	0
-4.2172	-64.45	-64.852	0	0
-4.2167	-64.439	-64.834	0	0
-4.2162	-64.437	-64.818	0	0
-4.2157	-64.437	-64.818	0	0
-4.2152	-64.437	-64.818	0	0
-4.2147	-64.436	-64.816	0	0
-4.2142	-64.429	-64.791	0	0
-4.2137	-64.42	-64.777	0	0
-4.2132	-64.41	-64.764	0	0
-4.2127	-64.404	-64.749	0	0
-4.2122	-64.398	-64.743	0	0
-4.2117	-64.398	-64.743	0	0
-4.2112	-64.398	-64.743	0	0
-4.2107	-64.398	-64.743	0	0
-4.2102	-64.398	-64.743	0	0
-4.2097	-64.401	-64.743	0	0
-4.2092	-64.404	-64.743	0	0
-4.2087	-64.41	-64.759	0	0
-4.2082	-64.423	-64.772	0	0
-4.2077	-64.425	-64.772	0	0
-4.2072	-64.44	-64.791	0	0
-4.2067	-64.479	-64.878	0	0
-4.2062	-64.56	-64.96	0	0
-4.2057	-64.635	-65.035	0	0
-4.2052	-64.705	-65.105	0	0
-4.2047	-64.77	-65.17	0	0
-4.2042	-64.83	-65.23	0	0
-4.2037	-64.895	-65.293	0	0
-4.2032	-64.95	-65.341	0	0
-4.2027	-64.95	-65.341	0	0
-4.2022	-64.95	-65.341	0	0
-4.2017	-64.95	-65.341	0	0
-4.2012	-64.95	-65.343	0	0
-4.2007	-64.965	-65.357	0	0
-4.2002	-64.965	-65.357	0	0
-4.1997	-64.965	-65.357	0	0
-4.1992	-64.965	-65.357	0	0
-4.1987	-64.965	-65.357	0	0
-4.1982	-64.965	-65.355	0	0
-4.1977	-64.936	-65.326	0	0
-4.1972	-64.915	-65.301	0	0
-4.1967	-64.897	-65.283	0	0
-4.1962	-64.879	-65.267	0	0
-4.1957	-64.862	-65.25	0	0
-4.1952	-64.846	-65.238	0	0
-4.1947	-64.837	-65.227	0	0
-4.1942	-64.816	-65.195	0	0
-4.1937	-64.697	-65.075	0	0
-4.1932	-64.583	-65.014	0	0
-4.1927	-64.583	-65.014	0	0
-4.1922	-64.583	-65.014	0	0
-4.1917	-64.583	-65.014	0	0
-4.1912	-64.583	-65.014	0	0
-4.1907	-64.583	-65.014	0	0
-4.1902	-64.583	-65.014	0	0
-4.1897	-64.583	-65.014	0	0
-4.1892	-64.583	-65.014	0	0
-4.1887	-64.583	-65.014	0	0
-4.1882	-64.617	-65.072	0	0
-4.1877	-64.688	-65.14	0	0
-4.1872	-64.754	-65.179	0	0
-4.1867	-64.754	-65.179	0	0
-4.1862	-64.765	-65.179	0	0
-4.1857	-64.765	-65.179	0	0
-4.1852	-64.765	-65.179	0	0
-4.1847	-64.765	-65.179	0	0
-4.1842	-64.765	-65.179	0	0
-4.1837	-64.765	-65.179	0	0
-4.1832	-64.765	-65.179	0	0
[truncated: 8,869 more rows]

## Sheet: Fig7E
-5.1827	-64.8	-64.8	-64.8	-64.8	-64.8	-64.8	-64.8	-64.8	-64.8	-64.8	-64.8	-64.8
-5.1807	-64.687	-64.68	-64.707	-64.693	-64.684	-64.68	-64.734	-64.746	-64.731	-64.724	-64.737	-64.73
-5.1787	-64.579	-64.572	-64.619	-64.593	-64.582	-64.579	-64.664	-64.69	-64.669	-64.649	-64.672	-64.659
-5.1767	-64.516	-64.504	-64.571	-64.538	-64.521	-64.517	-64.611	-64.647	-64.631	-64.605	-64.63	-64.605
-5.1747	-64.495	-64.498	-64.542	-64.509	-64.508	-64.507	-64.573	-64.613	-64.614	-64.591	-64.599	-64.563
-5.1727	-64.544	-64.559	-64.563	-64.537	-64.564	-64.562	-64.557	-64.599	-64.615	-64.6	-64.591	-64.548
-5.1707	-64.62	-64.646	-64.612	-64.595	-64.653	-64.65	-64.565	-64.611	-64.628	-64.623	-64.608	-64.561
-5.1687	-64.711	-64.743	-64.677	-64.679	-64.751	-64.748	-64.598	-64.655	-64.667	-64.671	-64.66	-64.62
-5.1667	-64.814	-64.848	-64.758	-64.78	-64.856	-64.851	-64.662	-64.723	-64.721	-64.736	-64.739	-64.706
-5.1647	-64.913	-64.951	-64.829	-64.871	-64.96	-64.952	-64.719	-64.787	-64.755	-64.781	-64.807	-64.784
-5.1627	-64.994	-65.035	-64.892	-64.949	-65.051	-65.044	-64.775	-64.851	-64.776	-64.811	-64.871	-64.858
-5.1607	-65.041	-65.08	-64.936	-65.002	-65.105	-65.101	-64.818	-64.902	-64.788	-64.829	-64.924	-64.917
-5.1587	-65.053	-65.099	-64.953	-65.026	-65.126	-65.122	-64.843	-64.933	-64.795	-64.835	-64.956	-64.952
-5.1567	-65.043	-65.096	-64.95	-65.023	-65.124	-65.12	-64.848	-64.935	-64.783	-64.822	-64.957	-64.949
-5.1547	-65.015	-65.075	-64.927	-64.996	-65.104	-65.099	-64.84	-64.922	-64.76	-64.8	-64.94	-64.929
-5.1527	-64.971	-65.034	-64.897	-64.956	-65.065	-65.06	-64.844	-64.925	-64.757	-64.796	-64.938	-64.927
-5.1507	-64.921	-64.972	-64.867	-64.91	-65.006	-64.997	-64.86	-64.936	-64.778	-64.814	-64.946	-64.935
-5.1487	-64.859	-64.902	-64.823	-64.851	-64.931	-64.917	-64.887	-64.957	-64.81	-64.843	-64.964	-64.953
-5.1467	-64.815	-64.838	-64.786	-64.802	-64.867	-64.852	-64.923	-64.988	-64.851	-64.882	-64.991	-64.98
-5.1447	-64.773	-64.786	-64.759	-64.762	-64.816	-64.802	-64.964	-65.029	-64.897	-64.927	-65.031	-65.021
-5.1427	-64.729	-64.74	-64.739	-64.734	-64.772	-64.758	-64.992	-65.071	-64.94	-64.968	-65.071	-65.062
-5.1407	-64.686	-64.701	-64.709	-64.705	-64.73	-64.717	-65.007	-65.097	-64.965	-64.994	-65.098	-65.089
-5.1387	-64.647	-64.682	-64.679	-64.676	-64.705	-64.695	-64.994	-65.111	-64.964	-64.997	-65.11	-65.101
-5.1367	-64.621	-64.682	-64.663	-64.66	-64.706	-64.701	-64.97	-65.109	-64.953	-64.989	-65.106	-65.093
-5.1347	-64.601	-64.7	-64.657	-64.654	-64.723	-64.722	-64.933	-65.09	-64.928	-64.967	-65.086	-65.071
-5.1327	-64.613	-64.724	-64.663	-64.662	-64.737	-64.745	-64.894	-65.067	-64.9	-64.942	-65.064	-65.047
-5.1307	-64.659	-64.765	-64.684	-64.684	-64.767	-64.784	-64.876	-65.046	-64.877	-64.919	-65.041	-65.023
-5.1287	-64.733	-64.831	-64.744	-64.74	-64.823	-64.848	-64.859	-65.021	-64.86	-64.896	-65.01	-64.996
-5.1267	-64.813	-64.905	-64.814	-64.814	-64.888	-64.921	-64.848	-64.992	-64.849	-64.87	-64.977	-64.966
-5.1247	-64.889	-64.98	-64.882	-64.891	-64.95	-64.989	-64.835	-64.968	-64.831	-64.845	-64.951	-64.949
-5.1227	-64.953	-65.038	-64.939	-64.956	-64.999	-65.042	-64.823	-64.949	-64.813	-64.819	-64.931	-64.941
-5.1207	-64.974	-65.085	-64.977	-65	-65.051	-65.087	-64.806	-64.927	-64.793	-64.792	-64.908	-64.927
-5.1187	-64.964	-65.114	-64.996	-65.024	-65.086	-65.113	-64.763	-64.9	-64.76	-64.758	-64.883	-64.908
-5.1167	-64.932	-65.122	-64.989	-65.023	-65.101	-65.12	-64.727	-64.883	-64.729	-64.732	-64.875	-64.9
-5.1147	-64.907	-65.121	-64.977	-65.014	-65.106	-65.117	-64.726	-64.884	-64.719	-64.736	-64.884	-64.908
-5.1127	-64.901	-65.119	-64.974	-65.011	-65.111	-65.108	-64.748	-64.905	-64.738	-64.761	-64.909	-64.929
-5.1107	-64.912	-65.13	-64.984	-65.023	-65.126	-65.11	-64.789	-64.944	-64.778	-64.812	-64.95	-64.962
-5.1087	-64.941	-65.15	-65.006	-65.049	-65.146	-65.124	-64.834	-64.985	-64.821	-64.867	-64.995	-64.997
-5.1067	-64.979	-65.175	-65.034	-65.081	-65.173	-65.147	-64.902	-65.026	-64.883	-64.931	-65.038	-65.032
-5.1047	-65.017	-65.199	-65.063	-65.113	-65.2	-65.17	-64.961	-65.06	-64.937	-64.984	-65.071	-65.061
-5.1027	-65.043	-65.216	-65.085	-65.138	-65.22	-65.187	-64.986	-65.077	-64.969	-65.01	-65.089	-65.074
-5.1007	-65.042	-65.219	-65.088	-65.138	-65.232	-65.205	-64.992	-65.075	-64.979	-65.016	-65.089	-65.07
-5.0987	-65.025	-65.199	-65.074	-65.12	-65.223	-65.204	-64.98	-65.05	-64.97	-65	-65.07	-65.052
-5.0967	-65.024	-65.163	-65.053	-65.093	-65.195	-65.179	-64.979	-65.027	-64.962	-64.985	-65.048	-65.034
-5.0947	-65.023	-65.138	-65.03	-65.066	-65.169	-65.156	-64.974	-65.014	-64.948	-64.97	-65.029	-65.023
-5.0927	-65.017	-65.115	-65.001	-65.035	-65.146	-65.136	-64.975	-65.007	-64.934	-64.965	-65.016	-65.016
-5.0907	-65.013	-65.088	-64.976	-65.009	-65.12	-65.115	-64.988	-65.011	-64.933	-64.973	-65.013	-65.02
-5.0887	-65.009	-65.054	-64.957	-64.992	-65.079	-65.076	-65.009	-65.026	-64.938	-64.989	-65.02	-65.033
-5.0867	-64.994	-65.027	-64.931	-64.966	-65.041	-65.042	-65.031	-65.057	-64.947	-65.009	-65.039	-65.057
-5.0847	-64.96	-65.008	-64.9	-64.938	-65.015	-65.023	-65.042	-65.091	-64.953	-65.023	-65.068	-65.09
-5.0827	-64.913	-64.973	-64.86	-64.902	-64.978	-64.995	-65.048	-65.117	-64.959	-65.033	-65.101	-65.119
-5.0807	-64.865	-64.922	-64.828	-64.866	-64.926	-64.952	-65.052	-65.133	-64.973	-65.041	-65.125	-65.141
-5.0787	-64.81	-64.871	-64.787	-64.821	-64.866	-64.902	-65.045	-65.138	-64.97	-65.032	-65.139	-65.152
-5.0767	-64.766	-64.841	-64.749	-64.784	-64.832	-64.87	-65.025	-65.129	-64.956	-65.009	-65.139	-65.15
-5.0747	-64.748	-64.814	-64.734	-64.774	-64.799	-64.83	-65.009	-65.109	-64.934	-64.978	-65.129	-65.137
-5.0727	-64.72	-64.775	-64.724	-64.761	-64.753	-64.775	-64.992	-65.083	-64.902	-64.95	-65.11	-65.116
-5.0707	-64.701	-64.743	-64.717	-64.751	-64.71	-64.722	-64.976	-65.068	-64.866	-64.921	-65.092	-65.098
-5.0687	-64.699	-64.737	-64.714	-64.75	-64.692	-64.692	-64.961	-65.064	-64.83	-64.896	-65.085	-65.09
-5.0667	-64.713	-64.753	-64.727	-64.767	-64.708	-64.688	-64.947	-65.069	-64.814	-64.886	-65.087	-65.092
-5.0647	-64.732	-64.77	-64.741	-64.785	-64.727	-64.694	-64.941	-65.084	-64.805	-64.884	-65.098	-65.103
-5.0627	-64.738	-64.809	-64.751	-64.798	-64.775	-64.746	-64.934	-65.1	-64.808	-64.894	-65.111	-65.116
-5.0607	-64.757	-64.857	-64.763	-64.818	-64.839	-64.815	-64.935	-65.121	-64.838	-64.913	-65.128	-65.133
-5.0587	-64.767	-64.896	-64.781	-64.835	-64.897	-64.878	-64.934	-65.131	-64.872	-64.927	-65.139	-65.144
-5.0567	-64.763	-64.917	-64.794	-64.844	-64.938	-64.925	-64.919	-65.119	-64.889	-64.924	-65.131	-65.136
-5.0547	-64.742	-64.918	-64.791	-64.836	-64.952	-64.95	-64.895	-65.092	-64.887	-64.905	-65.108	-65.114
-5.0527	-64.708	-64.903	-64.771	-64.813	-64.949	-64.956	-64.87	-65.059	-64.882	-64.888	-65.079	-65.084
-5.0507	-64.679	-64.865	-64.742	-64.781	-64.919	-64.927	-64.842	-65.022	-64.87	-64.862	-65.043	-65.051
-5.0487	-64.674	-64.841	-64.721	-64.765	-64.892	-64.899	-64.802	-64.969	-64.838	-64.827	-64.99	-65.003
-5.0467	-64.705	-64.843	-64.717	-64.772	-64.89	-64.897	-64.765	-64.915	-64.807	-64.8	-64.935	-64.954
-5.0447	-64.746	-64.855	-64.716	-64.783	-64.901	-64.907	-64.758	-64.884	-64.792	-64.796	-64.899	-64.922
-5.0427	-64.793	-64.866	-64.722	-64.8	-64.911	-64.912	-64.781	-64.871	-64.792	-64.809	-64.878	-64.904
-5.0407	-64.847	-64.879	-64.748	-64.827	-64.923	-64.917	-64.81	-64.864	-64.798	-64.829	-64.867	-64.896
-5.0387	-64.893	-64.891	-64.779	-64.855	-64.931	-64.914	-64.842	-64.863	-64.802	-64.851	-64.866	-64.893
-5.0367	-64.92	-64.9	-64.812	-64.873	-64.936	-64.908	-64.882	-64.885	-64.81	-64.878	-64.892	-64.912
-5.0347	-64.927	-64.897	-64.83	-64.879	-64.93	-64.892	-64.925	-64.918	-64.82	-64.905	-64.927	-64.939
-5.0327	-64.932	-64.899	-64.851	-64.892	-64.923	-64.875	-64.956	-64.95	-64.836	-64.928	-64.961	-64.968
-5.0307	-64.943	-64.922	-64.877	-64.913	-64.937	-64.888	-64.977	-64.984	-64.853	-64.95	-65.001	-65.004
-5.0287	-64.96	-64.955	-64.906	-64.938	-64.961	-64.914	-64.998	-65.022	-64.877	-64.973	-65.042	-65.042
-5.0267	-64.979	-64.994	-64.924	-64.959	-64.999	-64.963	-65.025	-65.064	-64.917	-65.003	-65.084	-65.084
-5.0247	-64.989	-65.017	-64.926	-64.966	-65.026	-65	-65.053	-65.098	-64.961	-65.035	-65.118	-65.119
-5.0227	-64.987	-65.022	-64.917	-64.96	-65.032	-65.015	-65.079	-65.127	-65	-65.064	-65.147	-65.151
-5.0207	-64.962	-65.001	-64.889	-64.927	-65.01	-65.006	-65.099	-65.148	-65.029	-65.086	-65.169	-65.173
-5.0187	-64.916	-64.948	-64.845	-64.874	-64.951	-64.951	-65.101	-65.151	-65.044	-65.095	-65.172	-65.174
-5.0167	-64.845	-64.865	-64.774	-64.793	-64.861	-64.86	-65.092	-65.144	-65.045	-65.091	-65.163	-65.163
-5.0147	-64.759	-64.765	-64.71	-64.707	-64.746	-64.736	-65.076	-65.136	-65.034	-65.079	-65.151	-65.149
-5.0127	-64.676	-64.664	-64.653	-64.63	-64.629	-64.61	-65.055	-65.116	-65.018	-65.062	-65.124	-65.124
-5.0107	-64.601	-64.577	-64.602	-64.562	-64.529	-64.506	-65.027	-65.088	-64.998	-65.038	-65.087	-65.091
-5.0087	-64.553	-64.516	-64.574	-64.525	-64.471	-64.431	-64.995	-65.053	-64.971	-65.006	-65.039	-65.052
-5.0067	-64.529	-64.483	-64.562	-64.503	-64.45	-64.404	-64.979	-65.03	-64.953	-64.985	-65.003	-65.027
-5.0047	-64.529	-64.485	-64.572	-64.514	-64.466	-64.419	-64.975	-65.015	-64.945	-64.973	-64.977	-65.013
-5.0027	-64.556	-64.511	-64.597	-64.546	-64.51	-64.468	-64.972	-65.001	-64.933	-64.963	-64.953	-65.001
-5.0007	-64.584	-64.567	-64.629	-64.586	-64.58	-64.544	-64.972	-65.004	-64.921	-64.955	-64.953	-65.003
-4.9987	-64.604	-64.628	-64.662	-64.626	-64.653	-64.622	-64.982	-65.016	-64.917	-64.959	-64.969	-65.019
-4.9967	-64.611	-64.677	-64.688	-64.656	-64.702	-64.686	-64.999	-65.033	-64.917	-64.971	-65.001	-65.043
-4.9947	-64.599	-64.722	-64.714	-64.69	-64.734	-64.729	-65.004	-65.043	-64.909	-64.972	-65.026	-65.057
-4.9927	-64.587	-64.762	-64.74	-64.723	-64.76	-64.765	-64.998	-65.038	-64.893	-64.962	-65.036	-65.058
-4.9907	-64.57	-64.803	-64.76	-64.75	-64.788	-64.804	-64.988	-65.025	-64.885	-64.95	-65.038	-65.051
-4.9887	-64.577	-64.823	-64.782	-64.779	-64.802	-64.828	-64.974	-64.998	-64.875	-64.932	-65.024	-65.032
-4.9867	-64.602	-64.84	-64.797	-64.807	-64.813	-64.848	-64.95	-64.964	-64.858	-64.903	-64.997	-65.003
-4.9847	-64.615	-64.853	-64.794	-64.817	-64.83	-64.865	-64.927	-64.937	-64.852	-64.879	-64.968	-64.971
-4.9827	-64.642	-64.866	-64.781	-64.815	-64.856	-64.887	-64.914	-64.918	-64.855	-64.871	-64.946	-64.944
-4.9807	-64.656	-64.868	-64.76	-64.801	-64.872	-64.899	-64.912	-64.917	-64.863	-64.872	-64.94	-64.934
-4.9787	-64.648	-64.854	-64.722	-64.764	-64.869	-64.889	-64.913	-64.923	-64.864	-64.872	-64.943	-64.933
-4.9767	-64.599	-64.828	-64.666	-64.705	-64.845	-64.854	-64.918	-64.939	-64.869	-64.882	-64.953	-64.938
-4.9747	-64.526	-64.787	-64.612	-64.635	-64.806	-64.804	-64.933	-64.965	-64.881	-64.901	-64.973	-64.954
-4.9727	-64.474	-64.748	-64.577	-64.58	-64.763	-64.754	-64.951	-64.994	-64.889	-64.918	-64.999	-64.981
-4.9707	-64.435	-64.71	-64.548	-64.537	-64.719	-64.705	-64.967	-65.02	-64.895	-64.93	-65.028	-65.014
-4.9687	-64.409	-64.677	-64.515	-64.495	-64.679	-64.661	-64.978	-65.037	-64.897	-64.934	-65.048	-65.038
-4.9667	-64.406	-64.656	-64.499	-64.477	-64.652	-64.631	-64.987	-65.049	-64.905	-64.944	-65.063	-65.058
-4.9647	-64.448	-64.665	-64.509	-64.489	-64.665	-64.649	-64.995	-65.058	-64.91	-64.95	-65.076	-65.075
-4.9627	-64.519	-64.696	-64.54	-64.529	-64.693	-64.688	-64.999	-65.06	-64.913	-64.952	-65.08	-65.086
-4.9607	-64.595	-64.73	-64.575	-64.578	-64.715	-64.729	-65	-65.052	-64.916	-64.954	-65.069	-65.082
-4.9587	-64.656	-64.763	-64.618	-64.625	-64.735	-64.766	-64.995	-65.043	-64.916	-64.954	-65.052	-65.067
-4.9567	-64.713	-64.796	-64.675	-64.681	-64.755	-64.804	-64.994	-65.035	-64.92	-64.961	-65.033	-65.051
-4.9547	-64.767	-64.828	-64.73	-64.738	-64.775	-64.841	-64.996	-65.029	-64.929	-64.97	-65.017	-65.038
-4.9527	-64.804	-64.853	-64.778	-64.785	-64.781	-64.859	-64.996	-65.02	-64.936	-64.975	-64.998	-65.021
-4.9507	-64.833	-64.883	-64.817	-64.823	-64.804	-64.883	-64.989	-65.01	-64.939	-64.976	-64.982	-65.004
-4.9487	-64.865	-64.931	-64.863	-64.871	-64.868	-64.933	-64.978	-65.005	-64.935	-64.973	-64.979	-64.994
-4.9467	-64.921	-64.989	-64.917	-64.934	-64.942	-64.994	-64.963	-65.006	-64.918	-64.963	-64.987	-64.997
-4.9447	-64.985	-65.054	-64.971	-64.998	-65.025	-65.063	-64.942	-65.013	-64.896	-64.946	-65.001	-65.009
-4.9427	-65.045	-65.12	-65.025	-65.057	-65.108	-65.133	-64.919	-65.021	-64.867	-64.92	-65.016	-65.022
-4.9407	-65.087	-65.172	-65.062	-65.103	-65.18	-65.189	-64.895	-65.029	-64.837	-64.891	-65.025	-65.034
-4.9387	-65.109	-65.195	-65.072	-65.126	-65.214	-65.211	-64.879	-65.036	-64.809	-64.867	-65.029	-65.04
-4.9367	-65.107	-65.192	-65.06	-65.122	-65.21	-65.202	-64.865	-65.032	-64.783	-64.843	-65.018	-65.032
-4.9347	-65.083	-65.181	-65.034	-65.102	-65.195	-65.18	-64.863	-65.016	-64.784	-64.829	-64.994	-65.009
-4.9327	-65.048	-65.156	-65	-65.073	-65.164	-65.142	-64.871	-64.996	-64.792	-64.824	-64.965	-64.981
-4.9307	-65.014	-65.122	-64.955	-65.037	-65.124	-65.094	-64.881	-64.974	-64.804	-64.831	-64.936	-64.951
-4.9287	-64.98	-65.09	-64.901	-64.999	-65.086	-65.051	-64.896	-64.954	-64.822	-64.847	-64.921	-64.927
-4.9267	-64.946	-65.071	-64.865	-64.971	-65.064	-65.033	-64.904	-64.943	-64.844	-64.862	-64.917	-64.918
-4.9247	-64.919	-65.051	-64.837	-64.95	-65.047	-65.019	-64.898	-64.937	-64.854	-64.87	-64.916	-64.919
-4.9227	-64.886	-65.016	-64.803	-64.923	-65.018	-64.994	-64.866	-64.929	-64.831	-64.86	-64.914	-64.922
-4.9207	-64.852	-64.988	-64.768	-64.895	-64.998	-64.982	-64.82	-64.913	-64.799	-64.843	-64.904	-64.916
-4.9187	-64.817	-64.968	-64.746	-64.873	-64.985	-64.978	-64.746	-64.894	-64.756	-64.806	-64.889	-64.905
-4.9167	-64.801	-64.954	-64.758	-64.859	-64.978	-64.977	-64.659	-64.869	-64.698	-64.757	-64.857	-64.886
-4.9147	-64.803	-64.945	-64.777	-64.85	-64.973	-64.974	-64.567	-64.825	-64.613	-64.692	-64.805	-64.844
-4.9127	-64.81	-64.953	-64.798	-64.845	-64.979	-64.982	-64.49	-64.772	-64.547	-64.635	-64.752	-64.79
-4.9107	-64.819	-64.978	-64.822	-64.846	-64.998	-65.003	-64.446	-64.725	-64.513	-64.6	-64.707	-64.741
-4.9087	-64.823	-64.99	-64.843	-64.842	-65.005	-65.007	-64.418	-64.685	-64.491	-64.574	-64.668	-64.699
-4.9067	-64.821	-64.984	-64.851	-64.829	-64.997	-64.996	-64.44	-64.653	-64.482	-64.57	-64.637	-64.662
-4.9047	-64.821	-64.969	-64.846	-64.826	-64.98	-64.976	-64.481	-64.634	-64.49	-64.58	-64.627	-64.642
-4.9027	-64.815	-64.956	-64.845	-64.833	-64.966	-64.959	-64.551	-64.649	-64.551	-64.625	-64.649	-64.653
-4.9007	-64.811	-64.94	-64.844	-64.838	-64.953	-64.943	-64.643	-64.69	-64.625	-64.691	-64.69	-64.694
-4.8987	-64.818	-64.925	-64.843	-64.844	-64.942	-64.932	-64.731	-64.742	-64.692	-64.755	-64.737	-64.74
-4.8967	-64.829	-64.923	-64.846	-64.857	-64.949	-64.942	-64.799	-64.795	-64.749	-64.811	-64.781	-64.79
-4.8947	-64.845	-64.937	-64.855	-64.877	-64.965	-64.959	-64.825	-64.839	-64.794	-64.848	-64.817	-64.834
-4.8927	-64.86	-64.96	-64.864	-64.89	-64.987	-64.981	-64.825	-64.862	-64.83	-64.87	-64.83	-64.858
-4.8907	-64.882	-64.982	-64.872	-64.901	-65.009	-65.003	-64.8	-64.859	-64.832	-64.866	-64.819	-64.857
-4.8887	-64.905	-65.002	-64.882	-64.919	-65.028	-65.021	-64.745	-64.846	-64.806	-64.837	-64.804	-64.841
-4.8867	-64.927	-65.018	-64.904	-64.944	-65.043	-65.035	-64.68	-64.828	-64.773	-64.796	-64.788	-64.829
-4.8847	-64.968	-65.045	-64.939	-64.98	-65.062	-65.051	-64.644	-64.819	-64.751	-64.768	-64.791	-64.825
-4.8827	-65.021	-65.091	-64.982	-65.026	-65.102	-65.092	-64.654	-64.831	-64.751	-64.765	-64.814	-64.84
-4.8807	-65.078	-65.148	-65.03	-65.079	-65.157	-65.149	-64.702	-64.873	-64.769	-64.788	-64.864	-64.883
-4.8787	-65.131	-65.207	-65.076	-65.131	-65.212	-65.208	-64.766	-64.927	-64.802	-64.826	-64.928	-64.941
-4.8767	-65.174	-65.26	-65.118	-65.175	-65.254	-65.259	-64.844	-64.974	-64.85	-64.877	-64.979	-64.994
-4.8747	-65.18	-65.301	-65.138	-65.201	-65.286	-65.3	-64.927	-65.015	-64.898	-64.935	-65.022	-65.038
-4.8727	-65.152	-65.316	-65.126	-65.2	-65.294	-65.318	-64.99	-65.043	-64.936	-64.982	-65.049	-65.068
-4.8707	-65.092	-65.297	-65.095	-65.173	-65.269	-65.301	-65.027	-65.058	-64.96	-65.012	-65.061	-65.085
-4.8687	-65.014	-65.254	-65.048	-65.129	-65.219	-65.257	-65.04	-65.055	-64.967	-65.02	-65.058	-65.087
-4.8667	-64.92	-65.195	-64.986	-65.069	-65.154	-65.198	-65.043	-65.049	-64.963	-65.018	-65.049	-65.081
-4.8647	-64.834	-65.136	-64.919	-65.002	-65.104	-65.142	-65.042	-65.05	-64.959	-65.014	-65.057	-65.084
-4.8627	-64.801	-65.088	-64.87	-64.947	-65.065	-65.095	-65.041	-65.056	-64.955	-65.007	-65.069	-65.091
-4.8607	-64.782	-65.045	-64.847	-64.907	-65.028	-65.057	-65.036	-65.059	-64.947	-64.994	-65.077	-65.093
-4.8587	-64.783	-65.009	-64.826	-64.877	-64.995	-65.023	-65.022	-65.044	-64.93	-64.971	-65.065	-65.078
-4.8567	-64.784	-64.976	-64.792	-64.84	-64.966	-64.995	-64.998	-65.014	-64.908	-64.949	-65.034	-65.046
-4.8547	-64.784	-64.947	-64.75	-64.803	-64.939	-64.969	-64.969	-64.984	-64.886	-64.926	-65.002	-65.013
-4.8527	-64.785	-64.923	-64.717	-64.773	-64.909	-64.945	-64.938	-64.949	-64.859	-64.899	-64.957	-64.971
-4.8507	-64.758	-64.896	-64.667	-64.736	-64.876	-64.919	-64.913	-64.92	-64.844	-64.876	-64.915	-64.929
-4.8487	-64.752	-64.887	-64.615	-64.708	-64.865	-64.907	-64.893	-64.899	-64.828	-64.856	-64.882	-64.898
-4.8467	-64.76	-64.9	-64.583	-64.695	-64.884	-64.918	-64.883	-64.901	-64.819	-64.841	-64.88	-64.891
-4.8447	-64.79	-64.934	-64.599	-64.716	-64.92	-64.948	-64.883	-64.914	-64.812	-64.829	-64.896	-64.9
-4.8427	-64.846	-64.984	-64.657	-64.77	-64.974	-64.995	-64.891	-64.923	-64.806	-64.817	-64.911	-64.908
-4.8407	-64.899	-65.033	-64.705	-64.814	-65.029	-65.043	-64.895	-64.929	-64.798	-64.804	-64.925	-64.914
-4.8387	-64.953	-65.079	-64.769	-64.866	-65.081	-65.088	-64.878	-64.919	-64.777	-64.779	-64.929	-64.917
-4.8367	-64.993	-65.114	-64.834	-64.91	-65.119	-65.124	-64.848	-64.904	-64.752	-64.759	-64.927	-64.916
-4.8347	-65.018	-65.131	-64.888	-64.938	-65.138	-65.143	-64.814	-64.878	-64.722	-64.742	-64.911	-64.903
-4.8327	-65.023	-65.122	-64.909	-64.94	-65.135	-65.14	-64.781	-64.862	-64.7	-64.726	-64.896	-64.893
-4.8307	-65.006	-65.094	-64.9	-64.917	-65.113	-65.117	-64.736	-64.847	-64.674	-64.701	-64.883	-64.884
-4.8287	-64.99	-65.06	-64.906	-64.909	-65.081	-65.082	-64.689	-64.826	-64.643	-64.675	-64.864	-64.87
-4.8267	-64.982	-65.034	-64.908	-64.909	-65.057	-65.056	-64.666	-64.816	-64.622	-64.662	-64.852	-64.859
-4.8247	-64.975	-65.011	-64.903	-64.906	-65.036	-65.033	-64.675	-64.816	-64.637	-64.669	-64.851	-64.857
-4.8227	-64.969	-64.996	-64.891	-64.907	-65.02	-65.014	-64.704	-64.832	-64.678	-64.694	-64.865	-64.872
-4.8207	-64.974	-65.005	-64.892	-64.92	-65.022	-65.013	-64.742	-64.851	-64.722	-64.733	-64.886	-64.893
-4.8187	-64.992	-65.03	-64.902	-64.944	-65.042	-65.031	-64.796	-64.882	-64.785	-64.798	-64.918	-64.925
-4.8167	-65.012	-65.071	-64.902	-64.961	-65.079	-65.071	-64.855	-64.921	-64.851	-64.866	-64.958	-64.964
-4.8147	-65.02	-65.103	-64.895	-64.965	-65.103	-65.104	-64.901	-64.956	-64.902	-64.921	-64.994	-65
-4.8127	-65.002	-65.116	-64.875	-64.954	-65.108	-65.117	-64.925	-64.991	-64.925	-64.957	-65.026	-65.032
-4.8107	-64.975	-65.112	-64.862	-64.944	-65.098	-65.116	-64.935	-65.014	-64.927	-64.976	-65.043	-65.051
-4.8087	-64.928	-65.08	-64.831	-64.915	-65.065	-65.092	-64.927	-65.021	-64.914	-64.974	-65.041	-65.054
-4.8067	-64.865	-65.025	-64.788	-64.871	-65.01	-65.044	-64.918	-65.014	-64.887	-64.952	-65.016	-65.039
-4.8047	-64.789	-64.947	-64.744	-64.814	-64.929	-64.966	-64.901	-64.995	-64.852	-64.921	-64.97	-65.003
-4.8027	-64.723	-64.871	-64.712	-64.762	-64.859	-64.89	-64.877	-64.963	-64.819	-64.884	-64.913	-64.954
-4.8007	-64.706	-64.826	-64.714	-64.747	-64.823	-64.845	-64.841	-64.912	-64.776	-64.83	-64.84	-64.89
-4.7987	-64.715	-64.813	-64.728	-64.748	-64.815	-64.827	-64.787	-64.849	-64.727	-64.766	-64.762	-64.815
-4.7967	-64.751	-64.837	-64.762	-64.772	-64.839	-64.842	-64.746	-64.792	-64.688	-64.711	-64.695	-64.746
-4.7947	-64.804	-64.883	-64.812	-64.814	-64.886	-64.882	-64.698	-64.74	-64.655	-64.666	-64.649	-64.689
-4.7927	-64.875	-64.956	-64.871	-64.876	-64.963	-64.956	-64.651	-64.716	-64.639	-64.642	-64.647	-64.676
-4.7907	-64.946	-65.034	-64.928	-64.939	-65.04	-65.032	-64.627	-64.722	-64.648	-64.645	-64.676	-64.697
-4.7887	-64.987	-65.084	-64.959	-64.975	-65.089	-65.082	-64.637	-64.761	-64.678	-64.687	-64.737	-64.749
-4.7867	-65.001	-65.092	-64.965	-64.98	-65.092	-65.086	-64.684	-64.829	-64.731	-64.757	-64.823	-64.83
-4.7847	-64.991	-65.061	-64.952	-64.964	-65.057	-65.052	-64.741	-64.913	-64.792	-64.836	-64.921	-64.924
-4.7827	-64.952	-65.007	-64.915	-64.92	-64.998	-64.993	-64.814	-65.012	-64.857	-64.919	-65.025	-65.029
-4.7807	-64.892	-64.928	-64.854	-64.856	-64.912	-64.905	-64.917	-65.105	-64.917	-64.999	-65.116	-65.121
-4.7787	-64.82	-64.837	-64.781	-64.778	-64.817	-64.809	-65.008	-65.181	-64.962	-65.064	-65.192	-65.196
-4.7767	-64.746	-64.759	-64.71	-64.7	-64.728	-64.718	-65.076	-65.233	-65.007	-65.11	-65.245	-65.249
-4.7747	-64.667	-64.717	-64.656	-64.645	-64.686	-64.674	-65.109	-65.258	-65.026	-65.129	-65.271	-65.274
-4.7727	-64.607	-64.708	-64.619	-64.608	-64.682	-64.668	-65.115	-65.254	-65.017	-65.122	-65.27	-65.271
-4.7707	-64.588	-64.727	-64.615	-64.611	-64.706	-64.689	-65.087	-65.225	-64.992	-65.095	-65.242	-65.244
-4.7687	-64.6	-64.774	-64.65	-64.644	-64.759	-64.738	-65.023	-65.172	-64.958	-65.053	-65.186	-65.192
-4.7667	-64.625	-64.826	-64.689	-64.694	-64.816	-64.79	-64.952	-65.113	-64.915	-65.004	-65.121	-65.13
-4.7647	-64.656	-64.872	-64.728	-64.75	-64.871	-64.844	-64.889	-65.06	-64.863	-64.953	-65.058	-65.071
-4.7627	-64.727	-64.908	-64.768	-64.803	-64.911	-64.882	-64.854	-65.026	-64.834	-64.923	-65.015	-65.034
-4.7607	-64.801	-64.936	-64.806	-64.855	-64.939	-64.91	-64.85	-65.022	-64.84	-64.923	-65.002	-65.028
-4.7587	-64.854	-64.952	-64.826	-64.884	-64.955	-64.926	-64.88	-65.036	-64.858	-64.94	-65.011	-65.041
-4.7567	-64.879	-64.949	-64.822	-64.888	-64.952	-64.922	-64.926	-65.07	-64.882	-64.964	-65.051	-65.078
-4.7547	-64.898	-64.957	-64.833	-64.889	-64.96	-64.937	-64.981	-65.114	-64.921	-64.998	-65.103	-65.126
-4.7527	-64.929	-64.987	-64.858	-64.903	-64.987	-64.968	-65.032	-65.157	-64.957	-65.031	-65.155	-65.174
-4.7507	-64.94	-65.013	-64.88	-64.915	-65.013	-64.997	-65.055	-65.185	-64.973	-65.047	-65.194	-65.208
-4.7487	-64.941	-65.036	-64.887	-64.919	-65.035	-65.022	-65.047	-65.185	-64.959	-65.033	-65.203	-65.212
-4.7467	-64.942	-65.055	-64.895	-64.925	-65.052	-65.036	-65.017	-65.173	-64.94	-65.01	-65.195	-65.2
-4.7447	-64.941	-65.067	-64.902	-64.933	-65.06	-65.036	-64.976	-65.154	-64.922	-64.991	-65.173	-65.178
-4.7427	-64.806	-65.051	-64.878	-64.911	-65.041	-65.005	-64.925	-65.126	-64.895	-64.965	-65.143	-65.148
-4.7407	-64.519	-64.981	-64.797	-64.826	-64.97	-64.924	-64.875	-65.097	-64.873	-64.941	-65.112	-65.117
-4.7387	-64.128	-64.874	-64.683	-64.696	-64.862	-64.806	-64.841	-65.045	-64.858	-64.913	-65.073	-65.079
-4.7367	-63.537	-64.699	-64.515	-64.493	-64.688	-64.623	-64.802	-64.922	-64.839	-64.876	-64.991	-64.998
-4.7347	-62.901	-64.476	-64.308	-64.251	-64.468	-64.406	-64.726	-64.717	-64.783	-64.798	-64.847	-64.856
-4.7327	-62.086	-64.234	-64.074	-63.981	-64.228	-64.185	-64.635	-64.449	-64.697	-64.686	-64.652	-64.662
-4.7307	-61.204	-63.955	-63.805	-63.669	-63.951	-63.928	-64.52	-64.144	-64.592	-64.552	-64.423	-64.435
-4.7287	-60.366	-63.673	-63.547	-63.37	-63.669	-63.664	-64.38	-63.784	-64.466	-64.395	-64.158	-64.173
-4.7267	-59.579	-63.409	-63.307	-63.095	-63.407	-63.422	-64.195	-63.362	-64.309	-64.21	-63.831	-63.851
-4.7247	-59.021	-63.219	-63.153	-62.917	-63.214	-63.248	-64.006	-63.017	-64.145	-64.026	-63.533	-63.56
-4.7227	-58.217	-63.053	-62.997	-62.726	-63.051	-63.096	-63.854	-62.751	-64.012	-63.878	-63.293	-63.331
-4.7207	-57.387	-62.856	-62.804	-62.483	-62.869	-62.909	-63.721	-62.562	-63.904	-63.755	-63.107	-63.156
-4.7187	-56.779	-62.678	-62.644	-62.28	-62.702	-62.737	-63.636	-62.433	-63.822	-63.662	-62.975	-63.035
-4.7167	-56.15	-62.526	-62.507	-62.102	-62.563	-62.593	-63.571	-62.394	-63.766	-63.6	-62.902	-62.97
-4.7147	-55.355	-62.349	-62.339	-61.884	-62.402	-62.426	-63.559	-62.464	-63.758	-63.594	-62.926	-62.997
-4.7127	-54.436	-62.121	-62.105	-61.598	-62.191	-62.214	-63.575	-62.536	-63.779	-63.611	-62.981	-63.048
-4.7107	-53.903	-61.906	-61.915	-61.371	-61.988	-62.011	-63.59	-62.589	-63.802	-63.626	-63.038	-63.094
-4.7087	-53.882	-61.787	-61.85	-61.297	-61.872	-61.898	-63.561	-62.543	-63.799	-63.618	-63.037	-63.082
-4.7067	-53.849	-61.752	-61.853	-61.297	-61.843	-61.872	-63.462	-62.396	-63.747	-63.561	-62.951	-62.986
-4.7047	-53.89	-61.725	-61.844	-61.291	-61.819	-61.849	-63.351	-62.162	-63.664	-63.469	-62.797	-62.824
-4.7027	-54.197	-61.738	-61.884	-61.343	-61.832	-61.861	-63.242	-61.981	-63.576	-63.372	-62.659	-62.681
-4.7007	-54.652	-61.807	-61.979	-61.459	-61.899	-61.924	-63.154	-61.861	-63.517	-63.311	-62.557	-62.579
-4.6987	-54.998	-61.893	-62.078	-61.576	-61.987	-62.009	-63.097	-61.816	-63.482	-63.283	-62.496	-62.518
-4.6967	-54.854	-61.925	-62.089	-61.588	-62.021	-62.041	-63.141	-61.922	-63.509	-63.325	-62.543	-62.564
-4.6947	-54.718	-61.881	-62.034	-61.529	-61.974	-61.992	-63.281	-62.158	-63.621	-63.448	-62.701	-62.72
-4.6927	-54.826	-61.866	-62.038	-61.533	-61.949	-61.969	-63.453	-62.474	-63.772	-63.616	-62.933	-62.95
-4.6907	-54.989	-61.894	-62.084	-61.583	-61.968	-61.988	-63.607	-62.702	-63.909	-63.769	-63.122	-63.136
-4.6887	-54.968	-61.918	-62.11	-61.61	-61.986	-62.007	-63.728	-62.788	-63.992	-63.864	-63.227	-63.237
-4.6867	-54.882	-61.924	-62.105	-61.605	-61.982	-62.004	-63.78	-62.724	-64.011	-63.887	-63.225	-63.238
-4.6847	-55.162	-61.968	-62.154	-61.663	-62.011	-62.033	-63.745	-62.551	-63.97	-63.84	-63.123	-63.144
-4.6827	-55.405	-62.08	-62.257	-61.781	-62.117	-62.14	-63.629	-62.216	-63.853	-63.717	-62.903	-62.933
-4.6807	-55.306	-62.159	-62.296	-61.828	-62.202	-62.218	-63.452	-61.765	-63.68	-63.527	-62.583	-62.623
-4.6787	-55.112	-62.182	-62.277	-61.81	-62.23	-62.243	-63.241	-61.244	-63.475	-63.298	-62.197	-62.247
-4.6767	-54.975	-62.183	-62.249	-61.783	-62.235	-62.244	-63.042	-60.882	-63.302	-63.098	-61.887	-61.947
-4.6747	-54.83	-62.168	-62.214	-61.746	-62.227	-62.233	-62.936	-60.697	-63.215	-62.993	-61.718	-61.783
-4.6727	-54.442	-62.11	-62.132	-61.654	-62.181	-62.185	-62.889	-60.565	-63.175	-62.941	-61.62	-61.68
-4.6707	-54.056	-61.99	-62.005	-61.511	-62.068	-62.066	-62.885	-60.553	-63.17	-62.931	-61.606	-61.658
-4.6687	-53.863	-61.896	-61.92	-61.413	-61.975	-61.978	-62.928	-60.658	-63.208	-62.969	-61.678	-61.722
-4.6667	-53.776	-61.843	-61.871	-61.358	-61.924	-61.93	-63.02	-60.857	-63.289	-63.059	-61.835	-61.87
-4.6647	-54.186	-61.882	-61.928	-61.422	-61.956	-61.964	-63.087	-60.907	-63.339	-63.116	-61.908	-61.933
-4.6627	-54.992	-62.06	-62.122	-61.647	-62.124	-62.132	-63.055	-60.79	-63.302	-63.075	-61.84	-61.857
-4.6607	-55.687	-62.31	-62.346	-61.914	-62.367	-62.376	-62.974	-60.681	-63.225	-62.99	-61.741	-61.756
-4.6587	-56.217	-62.563	-62.538	-62.147	-62.618	-62.633	-62.901	-60.594	-63.167	-62.921	-61.661	-61.675
-4.6567	-56.36	-62.734	-62.644	-62.28	-62.79	-62.807	-62.821	-60.443	-63.104	-62.847	-61.548	-61.561
-4.6547	-55.937	-62.788	-62.638	-62.275	-62.849	-62.867	-62.71	-60.256	-63.019	-62.748	-61.399	-61.413
-4.6527	-54.606	-62.633	-62.408	-62.008	-62.711	-62.73	-62.612	-60.151	-62.947	-62.66	-61.298	-61.318
-4.6507	-52.68	-62.245	-61.974	-61.495	-62.341	-62.359	-62.591	-60.219	-62.939	-62.644	-61.324	-61.353
-4.6487	-50.98	-61.751	-61.522	-60.941	-61.86	-61.876	-62.606	-60.226	-62.963	-62.66	-61.344	-61.38
-4.6467	-49.655	-61.288	-61.14	-60.467	-61.404	-61.414	-62.586	-60.155	-62.953	-62.635	-61.291	-61.334
-4.6447	-49.068	-60.975	-60.91	-60.18	-61.088	-61.091	-62.586	-60.186	-62.956	-62.627	-61.295	-61.343
-4.6427	-49.221	-60.842	-60.846	-60.102	-60.945	-60.95	-62.637	-60.303	-62.994	-62.659	-61.354	-61.408
-4.6407	-49.929	-60.896	-60.955	-60.236	-60.984	-60.994	-62.73	-60.46	-63.071	-62.743	-61.448	-61.515
-4.6387	-51.07	-61.111	-61.197	-60.533	-61.183	-61.204	-62.78	-60.453	-63.112	-62.786	-61.448	-61.522
-4.6367	-52.361	-61.417	-61.484	-60.897	-61.474	-61.505	-62.767	-60.42	-63.1	-62.774	-61.404	-61.485
-4.6347	-53.48	-61.737	-61.761	-61.253	-61.781	-61.821	-62.767	-60.453	-63.096	-62.775	-61.409	-61.498
-4.6327	-53.941	-61.941	-61.91	-61.448	-61.981	-62.033	-62.75	-60.416	-63.083	-62.763	-61.375	-61.475
-4.6307	-53.946	-62.002	-61.94	-61.488	-62.048	-62.1	-62.697	-60.343	-63.053	-62.733	-61.33	-61.436
-4.6287	-53.914	-61.989	-61.921	-61.462	-62.04	-62.088	-62.614	-60.227	-63.002	-62.677	-61.271	-61.366
-4.6267	-53.426	-61.898	-61.822	-61.336	-61.96	-62.001	-62.594	-60.317	-63.007	-62.688	-61.334	-61.417
-4.6247	-52.44	-61.72	-61.631	-61.1	-61.797	-61.836	-62.7	-60.591	-63.115	-62.815	-61.554	-61.625
-4.6227	-51.303	-61.468	-61.383	-60.79	-61.561	-61.599	-62.842	-60.83	-63.25	-62.972	-61.781	-61.839
-4.6207	-50.421	-61.234	-61.179	-60.53	-61.339	-61.375	-62.97	-61.062	-63.368	-63.111	-61.987	-62.035
-4.6187	-49.773	-61.052	-61.022	-60.332	-61.164	-61.203	-63.116	-61.258	-63.479	-63.244	-62.165	-62.206
-4.6167	-49.389	-60.933	-60.935	-60.22	-61.051	-61.093	-63.248	-61.411	-63.569	-63.351	-62.295	-62.337
-4.6147	-49.596	-60.927	-60.972	-60.257	-61.044	-61.088	-63.309	-61.403	-63.595	-63.383	-62.309	-62.352
-4.6127	-50.365	-61.039	-61.125	-60.432	-61.152	-61.194	-63.283	-61.305	-63.543	-63.334	-62.229	-62.275
-4.6107	-51.512	-61.272	-61.389	-60.742	-61.377	-61.417	-63.244	-61.284	-63.48	-63.276	-62.175	-62.221
-4.6087	-52.822	-61.568	-61.692	-61.103	-61.666	-61.702	-63.247	-61.297	-63.459	-63.266	-62.179	-62.22
-4.6067	-54.214	-61.903	-62.036	-61.511	-61.995	-62.028	-63.241	-61.324	-63.441	-63.257	-62.186	-62.22
-4.6047	-55.249	-62.2	-62.306	-61.831	-62.288	-62.318	-63.256	-61.401	-63.448	-63.275	-62.237	-62.267
-4.6027	-56.141	-62.427	-62.505	-62.069	-62.511	-62.539	-63.308	-61.542	-63.485	-63.33	-62.344	-62.371
-4.6007	-56.789	-62.597	-62.653	-62.244	-62.675	-62.705	-63.378	-61.648	-63.548	-63.401	-62.445	-62.47
-4.5987	-57.149	-62.683	-62.713	-62.312	-62.754	-62.789	-63.439	-61.723	-63.609	-63.465	-62.521	-62.543
-4.5967	-57.461	-62.736	-62.755	-62.366	-62.797	-62.837	-63.492	-61.829	-63.657	-63.518	-62.602	-62.622
-4.5947	-57.721	-62.789	-62.776	-62.4	-62.833	-62.878	-63.545	-61.953	-63.704	-63.573	-62.701	-62.721
-4.5927	-58.148	-62.882	-62.859	-62.501	-62.909	-62.956	-63.606	-62.138	-63.756	-63.635	-62.83	-62.847
-4.5907	-58.36	-62.98	-62.939	-62.601	-62.993	-63.041	-63.698	-62.373	-63.839	-63.728	-63.002	-63.016
-4.5887	-58.547	-63.067	-63.013	-62.697	-63.072	-63.115	-63.826	-62.702	-63.955	-63.857	-63.236	-63.247
-4.5867	-58.804	-63.166	-63.105	-62.82	-63.169	-63.199	-63.978	-63.016	-64.084	-64.004	-63.485	-63.498
-4.5847	-59.035	-63.264	-63.192	-62.929	-63.266	-63.285	-64.109	-63.281	-64.198	-64.132	-63.693	-63.709
-4.5827	-59.209	-63.34	-63.28	-63.026	-63.347	-63.354	-64.251	-63.538	-64.316	-64.267	-63.891	-63.91
-4.5807	-59.269	-63.369	-63.308	-63.059	-63.384	-63.383	-64.377	-63.728	-64.422	-64.385	-64.051	-64.074
-4.5787	-59.6	-63.419	-63.367	-63.129	-63.436	-63.429	-64.443	-63.798	-64.471	-64.439	-64.116	-64.144
-4.5767	-60.162	-63.538	-63.482	-63.271	-63.555	-63.547	-64.441	-63.756	-64.457	-64.426	-64.094	-64.123
-4.5747	-60.879	-63.731	-63.67	-63.489	-63.744	-63.738	-64.405	-63.719	-64.422	-64.387	-64.052	-64.079
-4.5727	-61.53	-63.948	-63.865	-63.722	-63.959	-63.954	-64.379	-63.711	-64.401	-64.362	-64.036	-64.06
-4.5707	-62.168	-64.16	-64.034	-63.941	-64.169	-64.165	-64.359	-63.74	-64.395	-64.345	-64.049	-64.069
-4.5687	-62.788	-64.381	-64.213	-64.172	-64.386	-64.382	-64.332	-63.789	-64.399	-64.338	-64.08	-64.097
-4.5667	-63.163	-64.552	-64.328	-64.331	-64.558	-64.553	-64.328	-63.921	-64.431	-64.371	-64.17	-64.183
-4.5647	-63.301	-64.634	-64.376	-64.397	-64.643	-64.636	-64.347	-64.082	-64.49	-64.434	-64.291	-64.302
-4.5627	-63.162	-64.607	-64.324	-64.346	-64.62	-64.619	-64.367	-64.237	-64.549	-64.497	-64.413	-64.423
-4.5607	-62.916	-64.505	-64.209	-64.219	-64.52	-64.527	-64.386	-64.364	-64.597	-64.55	-64.514	-64.523
-4.5587	-62.601	-64.358	-64.08	-64.058	-64.375	-64.391	-64.391	-64.448	-64.631	-64.595	-64.583	-64.592
-4.5567	-62.39	-64.198	-63.955	-63.903	-64.215	-64.24	-64.433	-64.51	-64.663	-64.639	-64.636	-64.644
-4.5547	-62.274	-64.077	-63.892	-63.805	-64.091	-64.124	-64.489	-64.55	-64.689	-64.671	-64.67	-64.68
-4.5527	-62.206	-63.999	-63.859	-63.749	-64.008	-64.048	-64.57	-64.634	-64.721	-64.71	-64.725	-64.739
-4.5507	-62.411	-63.996	-63.9	-63.785	-63.997	-64.033	-64.685	-64.735	-64.777	-64.777	-64.803	-64.821
-4.5487	-62.848	-64.101	-64.048	-63.951	-64.097	-64.122	-64.808	-64.851	-64.843	-64.853	-64.896	-64.918
-4.5467	-63.374	-64.284	-64.256	-64.188	-64.275	-64.288	-64.925	-64.963	-64.894	-64.912	-64.987	-65.01
-4.5447	-63.831	-64.492	-64.456	-64.426	-64.479	-64.48	-64.995	-65.058	-64.921	-64.943	-65.051	-65.078
-4.5427	-64.234	-64.676	-64.619	-64.628	-64.661	-64.651	-65.031	-65.127	-64.934	-64.963	-65.094	-65.122
-4.5407	-64.597	-64.828	-64.754	-64.799	-64.805	-64.791	-65.044	-65.15	-64.935	-64.969	-65.115	-65.139
-4.5387	-64.777	-64.926	-64.837	-64.907	-64.895	-64.89	-65.019	-65.135	-64.906	-64.942	-65.098	-65.117
-4.5367	-64.796	-64.937	-64.841	-64.921	-64.896	-64.904	-64.972	-65.096	-64.858	-64.895	-65.056	-65.071
-4.5347	-64.788	-64.898	-64.806	-64.886	-64.85	-64.873	-64.927	-65.054	-64.824	-64.865	-65.01	-65.029
-4.5327	-64.781	-64.85	-64.792	-64.853	-64.791	-64.829	-64.896	-65.028	-64.806	-64.854	-64.989	-65.007
-4.5307	-64.791	-64.82	-64.792	-64.836	-64.753	-64.804	-64.874	-65.017	-64.802	-64.855	-64.984	-65.003
-4.5287	-64.811	-64.81	-64.804	-64.833	-64.752	-64.804	-64.834	-65.007	-64.799	-64.856	-64.977	-64.999
-4.5267	-64.775	-64.805	-64.806	-64.813	-64.767	-64.806	-64.791	-65.001	-64.792	-64.852	-64.974	-65
-4.5247	-64.551	-64.777	-64.756	-64.737	-64.761	-64.791	-64.751	-64.997	-64.789	-64.851	-64.972	-65.001
-4.5227	-64.177	-64.684	-64.641	-64.596	-64.691	-64.707	-64.696	-64.985	-64.768	-64.834	-64.968	-64.994
-4.5207	-63.749	-64.533	-64.465	-64.405	-64.561	-64.563	-64.638	-64.963	-64.741	-64.806	-64.955	-64.977
-4.5187	-63.255	-64.336	-64.251	-64.173	-64.385	-64.375	-64.601	-64.936	-64.709	-64.769	-64.935	-64.954
-4.5167	-62.621	-64.099	-64	-63.896	-64.153	-64.14	-64.608	-64.915	-64.684	-64.74	-64.921	-64.937
-4.5147	-62.08	-63.856	-63.759	-63.642	-63.898	-63.894	-64.64	-64.908	-64.683	-64.737	-64.921	-64.933
-4.5127	-61.907	-63.684	-63.626	-63.506	-63.7	-63.712	-64.683	-64.918	-64.692	-64.742	-64.937	-64.946
-4.5107	-61.978	-63.623	-63.61	-63.489	-63.611	-63.645	-64.75	-64.944	-64.721	-64.753	-64.965	-64.971
-4.5087	-62.131	-63.645	-63.668	-63.546	-63.608	-63.66	-64.833	-64.991	-64.77	-64.784	-65.008	-65.013
-4.5067	-62.361	-63.716	-63.773	-63.645	-63.653	-63.721	-64.91	-65.048	-64.826	-64.826	-65.062	-65.067
-4.5047	-62.756	-63.834	-63.92	-63.796	-63.755	-63.832	-64.967	-65.106	-64.88	-64.869	-65.116	-65.121
-4.5027	-63.133	-63.982	-64.082	-63.961	-63.896	-63.971	-65.013	-65.155	-64.918	-64.903	-65.163	-65.168
-4.5007	-63.325	-64.122	-64.21	-64.092	-64.046	-64.094	-65.051	-65.192	-64.951	-64.937	-65.198	-65.203
-4.4987	-63.3	-64.219	-64.279	-64.165	-64.159	-64.172	-65.081	-65.223	-64.975	-64.981	-65.227	-65.232
-4.4967	-63.213	-64.273	-64.295	-64.191	-64.23	-64.217	-65.101	-65.241	-64.98	-65.013	-65.247	-65.251
-4.4947	-63.105	-64.291	-64.282	-64.196	-64.264	-64.227	-65.111	-65.25	-64.975	-65.037	-65.255	-65.259
-4.4927	-63.079	-64.294	-64.276	-64.207	-64.272	-64.218	-65.116	-65.251	-64.966	-65.056	-65.257	-65.261
-4.4907	-63.077	-64.3	-64.281	-64.229	-64.281	-64.219	-65.117	-65.248	-64.96	-65.069	-65.254	-65.258
-4.4887	-63.123	-64.297	-64.278	-64.24	-64.277	-64.227	-65.121	-65.247	-64.955	-65.08	-65.252	-65.255
-4.4867	-63.386	-64.315	-64.305	-64.285	-64.289	-64.255	-65.12	-65.238	-64.957	-65.083	-65.243	-65.241
-4.4847	-63.709	-64.374	-64.372	-64.366	-64.336	-64.316	-65.117	-65.225	-64.966	-65.086	-65.228	-65.222
-4.4827	-64.059	-64.477	-64.474	-64.479	-64.434	-64.426	-65.116	-65.211	-64.985	-65.089	-65.211	-65.2
-4.4807	-64.299	-64.597	-64.568	-64.582	-64.561	-64.557	-65.112	-65.192	-65	-65.089	-65.19	-65.172
-4.4787	-64.486	-64.696	-64.635	-64.654	-64.667	-64.665	-65.102	-65.169	-65.012	-65.086	-65.164	-65.138
-4.4767	-64.645	-64.792	-64.701	-64.726	-64.768	-64.764	-65.078	-65.138	-65.018	-65.075	-65.131	-65.099
-4.4747	-64.688	-64.864	-64.749	-64.775	-64.839	-64.84	-65.044	-65.105	-65.01	-65.057	-65.1	-65.068
-4.4727	-64.696	-64.908	-64.784	-64.804	-64.883	-64.887	-65.002	-65.067	-64.994	-65.033	-65.066	-65.035
-4.4707	-64.614	-64.91	-64.779	-64.792	-64.887	-64.894	-64.957	-65.026	-64.965	-65.003	-65.033	-65.005
-4.4687	-64.448	-64.866	-64.73	-64.737	-64.841	-64.859	-64.909	-64.986	-64.933	-64.97	-65	-64.975
-4.4667	-64.288	-64.812	-64.678	-64.682	-64.786	-64.815	-64.866	-64.947	-64.898	-64.937	-64.97	-64.951
-4.4647	-64.12	-64.745	-64.62	-64.618	-64.714	-64.755	-64.847	-64.922	-64.873	-64.915	-64.951	-64.937
-4.4627	-63.968	-64.684	-64.564	-64.557	-64.659	-64.703	-64.848	-64.914	-64.859	-64.902	-64.944	-64.933
-4.4607	-63.814	-64.625	-64.5	-64.491	-64.607	-64.654	-64.858	-64.918	-64.844	-64.887	-64.946	-64.936
-4.4587	-63.783	-64.582	-64.465	-64.455	-64.566	-64.615	-64.852	-64.921	-64.824	-64.858	-64.942	-64.93
-4.4567	-63.935	-64.586	-64.492	-64.486	-64.568	-64.611	-64.843	-64.921	-64.806	-64.827	-64.937	-64.925
-4.4547	-64.131	-64.617	-64.535	-64.542	-64.595	-64.632	-64.834	-64.922	-64.791	-64.8	-64.932	-64.916
-4.4527	-64.326	-64.66	-64.578	-64.598	-64.643	-64.664	-64.815	-64.912	-64.771	-64.768	-64.919	-64.898
-4.4507	-64.492	-64.687	-64.606	-64.635	-64.675	-64.682	-64.782	-64.883	-64.745	-64.732	-64.889	-64.86
-4.4487	-64.654	-64.701	-64.63	-64.674	-64.694	-64.685	-64.756	-64.853	-64.734	-64.715	-64.86	-64.824
-4.4467	-64.753	-64.715	-64.644	-64.693	-64.711	-64.688	-64.771	-64.841	-64.747	-64.735	-64.847	-64.807
-4.4447	-64.754	-64.715	-64.641	-64.685	-64.718	-64.687	-64.792	-64.836	-64.761	-64.759	-64.836	-64.795
-4.4427	-64.724	-64.71	-64.643	-64.669	-64.72	-64.684	-64.809	-64.839	-64.767	-64.779	-64.835	-64.799
-4.4407	-64.7	-64.705	-64.647	-64.663	-64.719	-64.684	-64.812	-64.851	-64.77	-64.795	-64.84	-64.81
-4.4387	-64.704	-64.723	-64.659	-64.678	-64.737	-64.708	-64.808	-64.877	-64.773	-64.809	-64.859	-64.841
-4.4367	-64.716	-64.749	-64.677	-64.698	-64.765	-64.743	-64.787	-64.892	-64.764	-64.81	-64.87	-64.865
-4.4347	-64.732	-64.767	-64.691	-64.727	-64.783	-64.774	-64.743	-64.893	-64.745	-64.793	-64.875	-64.881
-4.4327	-64.744	-64.783	-64.688	-64.739	-64.798	-64.803	-64.715	-64.907	-64.746	-64.793	-64.896	-64.903
-4.4307	-64.75	-64.785	-64.665	-64.735	-64.799	-64.816	-64.701	-64.919	-64.768	-64.808	-64.914	-64.919
-4.4287	-64.751	-64.778	-64.645	-64.719	-64.79	-64.817	-64.718	-64.926	-64.797	-64.832	-64.932	-64.933
-4.4267	-64.74	-64.766	-64.637	-64.699	-64.772	-64.809	-64.75	-64.923	-64.824	-64.855	-64.936	-64.934
-4.4247	-64.733	-64.772	-64.635	-64.681	-64.767	-64.811	-64.794	-64.923	-64.849	-64.878	-64.935	-64.929
-4.4227	-64.741	-64.8	-64.657	-64.678	-64.798	-64.837	-64.842	-64.926	-64.866	-64.895	-64.93	-64.921
-4.4207	-64.765	-64.834	-64.698	-64.701	-64.837	-64.869	-64.87	-64.914	-64.862	-64.891	-64.911	-64.905
-4.4187	-64.814	-64.888	-64.757	-64.745	-64.894	-64.918	-64.882	-64.901	-64.844	-64.872	-64.892	-64.892
-4.4167	-64.87	-64.954	-64.81	-64.797	-64.963	-64.98	-64.872	-64.887	-64.817	-64.841	-64.869	-64.876
-4.4147	-64.924	-65.017	-64.842	-64.845	-65.032	-65.043	-64.859	-64.885	-64.8	-64.819	-64.858	-64.869
-4.4127	-64.954	-65.059	-64.859	-64.878	-65.084	-65.089	-64.848	-64.891	-64.787	-64.801	-64.863	-64.879
-4.4107	-64.961	-65.08	-64.852	-64.887	-65.105	-65.109	-64.837	-64.903	-64.786	-64.787	-64.875	-64.898
-4.4087	-64.948	-65.087	-64.829	-64.879	-65.108	-65.11	-64.834	-64.919	-64.79	-64.779	-64.892	-64.918
-4.4067	-64.91	-65.074	-64.785	-64.854	-65.091	-65.091	-64.842	-64.937	-64.799	-64.78	-64.908	-64.936
-4.4047	-64.86	-65.045	-64.745	-64.825	-65.058	-65.056	-64.865	-64.961	-64.819	-64.794	-64.932	-64.962
-4.4027	-64.813	-65.012	-64.724	-64.799	-65.02	-65.017	-64.889	-64.988	-64.835	-64.808	-64.963	-64.993
-4.4007	-64.793	-64.984	-64.711	-64.783	-64.988	-64.983	-64.916	-65.019	-64.857	-64.829	-65	-65.026
-4.3987	-64.787	-64.956	-64.704	-64.776	-64.96	-64.953	-64.954	-65.057	-64.884	-64.87	-65.043	-65.064
-4.3967	-64.793	-64.932	-64.707	-64.781	-64.939	-64.933	-65.002	-65.103	-64.92	-64.926	-65.095	-65.111
-4.3947	-64.817	-64.92	-64.734	-64.801	-64.921	-64.921	-65.051	-65.151	-64.959	-64.984	-65.151	-65.162
-4.3927	-64.857	-64.924	-64.771	-64.828	-64.918	-64.924	-65.092	-65.196	-64.983	-65.036	-65.203	-65.209
-4.3907	-64.896	-64.933	-64.803	-64.85	-64.919	-64.932	-65.125	-65.229	-65.002	-65.08	-65.24	-65.243
-4.3887	-64.915	-64.932	-64.824	-64.852	-64.905	-64.931	-65.145	-65.244	-65.013	-65.111	-65.255	-65.256
-4.3867	-64.904	-64.93	-64.827	-64.83	-64.883	-64.924	-65.143	-65.24	-65.008	-65.115	-65.251	-65.25
-4.3847	-64.876	-64.925	-64.816	-64.789	-64.861	-64.916	-65.121	-65.218	-64.982	-65.096	-65.228	-65.223
-4.3827	-64.837	-64.913	-64.79	-64.737	-64.85	-64.907	-65.084	-65.182	-64.94	-65.061	-65.187	-65.179
-4.3807	-64.785	-64.885	-64.752	-64.678	-64.825	-64.885	-65.041	-65.135	-64.909	-65.021	-65.136	-65.123
-4.3787	-64.724	-64.844	-64.707	-64.616	-64.793	-64.852	-64.999	-65.089	-64.877	-64.982	-65.088	-65.072
-4.3767	-64.662	-64.801	-64.668	-64.578	-64.771	-64.817	-64.962	-65.054	-64.841	-64.942	-65.051	-65.036
-4.3747	-64.639	-64.766	-64.647	-64.571	-64.757	-64.789	-64.941	-65.029	-64.81	-64.913	-65.025	-65.01
-4.3727	-64.634	-64.741	-64.644	-64.585	-64.753	-64.769	-64.932	-65.016	-64.802	-64.898	-65.012	-64.999
-4.3707	-64.631	-64.726	-64.644	-64.602	-64.747	-64.754	-64.939	-65.024	-64.815	-64.902	-65.022	-65.013
-4.3687	-64.638	-64.73	-64.654	-64.633	-64.755	-64.75	-64.962	-65.047	-64.841	-64.921	-65.049	-65.045
-4.3667	-64.667	-64.752	-64.681	-64.685	-64.774	-64.759	-64.991	-65.076	-64.877	-64.951	-65.083	-65.082
-4.3647	-64.729	-64.805	-64.729	-64.748	-64.821	-64.805	-65.02	-65.106	-64.92	-64.989	-65.116	-65.118
-4.3627	-64.782	-64.86	-64.78	-64.801	-64.873	-64.856	-65.048	-65.137	-64.971	-65.03	-65.151	-65.154
-4.3607	-64.831	-64.901	-64.814	-64.838	-64.91	-64.889	-65.073	-65.166	-65.012	-65.066	-65.183	-65.188
-4.3587	-64.878	-64.933	-64.845	-64.873	-64.939	-64.914	-65.085	-65.182	-65.037	-65.084	-65.201	-65.206
-4.3567	-64.917	-64.957	-64.866	-64.894	-64.963	-64.94	-65.072	-65.185	-65.039	-65.083	-65.204	-65.208
-4.3547	-64.933	-64.973	-64.87	-64.889	-64.984	-64.964	-65.055	-65.183	-65.032	-65.072	-65.199	-65.204
-4.3527	-64.913	-64.966	-64.847	-64.861	-64.977	-64.958	-65.044	-65.18	-65.026	-65.061	-65.194	-65.199
-4.3507	-64.89	-64.964	-64.829	-64.843	-64.97	-64.953	-65.034	-65.178	-65.016	-65.049	-65.19	-65.195
-4.3487	-64.874	-64.979	-64.829	-64.836	-64.984	-64.973	-65.026	-65.18	-65.01	-65.042	-65.189	-65.194
-4.3467	-64.851	-64.994	-64.824	-64.823	-65	-64.995	-65.033	-65.193	-65.019	-65.055	-65.199	-65.203
-4.3447	-64.826	-65.002	-64.816	-64.808	-65.008	-65.007	-65.067	-65.202	-65.037	-65.078	-65.211	-65.211
-4.3427	-64.818	-65.008	-64.822	-64.813	-65.013	-65.015	-65.092	-65.201	-65.042	-65.09	-65.215	-65.211
-4.3407	-64.837	-65.022	-64.844	-64.836	-65.026	-65.029	-65.103	-65.191	-65.037	-65.09	-65.209	-65.2
-4.3387	-64.857	-65.028	-64.858	-64.848	-65.033	-65.035	-65.104	-65.169	-65.024	-65.081	-65.192	-65.179
-4.3367	-64.874	-65.024	-64.863	-64.856	-65.028	-65.026	-65.095	-65.134	-65.003	-65.062	-65.162	-65.145
-4.3347	-64.911	-65.032	-64.887	-64.887	-65.033	-65.028	-65.071	-65.084	-64.968	-65.025	-65.116	-65.094
-4.3327	-64.95	-65.047	-64.918	-64.927	-65.046	-65.034	-65.034	-65.051	-64.934	-64.987	-65.077	-65.057
-4.3307	-64.972	-65.046	-64.929	-64.944	-65.046	-65.025	-65.014	-65.035	-64.926	-64.971	-65.049	-65.036
-4.3287	-64.971	-65.027	-64.918	-64.939	-65.028	-64.999	-65.004	-65.028	-64.926	-64.963	-65.03	-65.024
-4.3267	-64.962	-65.009	-64.904	-64.931	-65.012	-64.978	-64.999	-65.029	-64.93	-64.962	-65.018	-65.02
-4.3247	-64.951	-64.992	-64.888	-64.924	-64.998	-64.959	-65.001	-65.036	-64.938	-64.965	-65.014	-65.023
-4.3227	-64.915	-64.96	-64.848	-64.892	-64.971	-64.926	-65.008	-65.054	-64.947	-64.973	-65.021	-65.04
-4.3207	-64.883	-64.928	-64.803	-64.855	-64.942	-64.9	-65.015	-65.064	-64.948	-64.978	-65.028	-65.051
-4.3187	-64.873	-64.933	-64.789	-64.843	-64.943	-64.909	-65.014	-65.067	-64.937	-64.973	-65.038	-65.054
-4.3167	-64.885	-64.966	-64.8	-64.858	-64.976	-64.952	-65.009	-65.069	-64.922	-64.961	-65.046	-65.055
-4.3147	-64.899	-65.006	-64.816	-64.884	-65.015	-64.997	-65.002	-65.069	-64.906	-64.949	-65.052	-65.054
-4.3127	-64.899	-65.021	-64.823	-64.891	-65.031	-65.018	-64.982	-65.07	-64.889	-64.936	-65.059	-65.054
-4.3107	-64.901	-65.017	-64.837	-64.894	-65.028	-65.017	-64.944	-65.064	-64.876	-64.918	-65.06	-65.046
-4.3087	-64.885	-64.99	-64.838	-64.881	-65.003	-64.991	-64.908	-65.059	-64.875	-64.907	-65.059	-65.041
-4.3067	-64.838	-64.919	-64.803	-64.834	-64.941	-64.925	-64.875	-65.055	-64.877	-64.902	-65.057	-65.043
-4.3047	-64.761	-64.805	-64.732	-64.753	-64.834	-64.808	-64.843	-65.053	-64.883	-64.904	-65.056	-65.047
-4.3027	-64.683	-64.675	-64.66	-64.66	-64.71	-64.675	-64.801	-65.048	-64.883	-64.898	-65.054	-65.049
-4.3007	-64.634	-64.585	-64.608	-64.6	-64.62	-64.581	-64.776	-65.036	-64.873	-64.885	-65.043	-65.043
-4.2987	-64.609	-64.541	-64.577	-64.569	-64.579	-64.54	-64.786	-65.026	-64.868	-64.879	-65.035	-65.038
-4.2967	-64.616	-64.535	-64.573	-64.573	-64.577	-64.538	-64.794	-65.017	-64.855	-64.867	-65.027	-65.033
-4.2947	-64.65	-64.561	-64.599	-64.61	-64.601	-64.559	-64.806	-65.012	-64.846	-64.858	-65.021	-65.026
-4.2927	-64.7	-64.61	-64.653	-64.665	-64.65	-64.612	-64.829	-65.011	-64.842	-64.855	-65.019	-65.021
-4.2907	-64.754	-64.67	-64.706	-64.725	-64.714	-64.681	-64.868	-65.016	-64.846	-64.862	-65.022	-65.022
-4.2887	-64.795	-64.716	-64.752	-64.775	-64.766	-64.735	-64.905	-65.026	-64.868	-64.884	-65.033	-65.031
-4.2867	-64.815	-64.741	-64.775	-64.804	-64.796	-64.765	-64.909	-65.033	-64.881	-64.898	-65.042	-65.038
-4.2847	-64.806	-64.756	-64.77	-64.807	-64.81	-64.779	-64.903	-65.034	-64.89	-64.912	-65.044	-65.038
-4.2827	-64.783	-64.772	-64.749	-64.792	-64.825	-64.8	-64.891	-65.024	-64.892	-64.917	-65.036	-65.027
-4.2807	-64.771	-64.808	-64.731	-64.786	-64.855	-64.837	-64.863	-65	-64.88	-64.903	-65.014	-65.001
-4.2787	-64.757	-64.857	-64.718	-64.784	-64.894	-64.881	-64.827	-64.967	-64.859	-64.879	-64.982	-64.965
-4.2767	-64.742	-64.898	-64.705	-64.779	-64.928	-64.92	-64.786	-64.938	-64.827	-64.846	-64.95	-64.928
-4.2747	-64.743	-64.933	-64.711	-64.779	-64.956	-64.955	-64.781	-64.911	-64.805	-64.824	-64.919	-64.893
-4.2727	-64.766	-64.965	-64.74	-64.793	-64.985	-64.989	-64.789	-64.885	-64.782	-64.804	-64.892	-64.862
-4.2707	-64.802	-64.995	-64.786	-64.826	-65.015	-65.021	-64.787	-64.853	-64.746	-64.773	-64.856	-64.832
-4.2687	-64.828	-65.016	-64.826	-64.854	-65.037	-65.043	-64.792	-64.834	-64.72	-64.759	-64.833	-64.821
-4.2667	-64.869	-65.034	-64.869	-64.887	-65.057	-65.062	-64.806	-64.827	-64.711	-64.763	-64.823	-64.822
-4.2647	-64.912	-65.061	-64.914	-64.923	-65.083	-65.088	-64.827	-64.822	-64.706	-64.773	-64.819	-64.829
-4.2627	-64.952	-65.103	-64.946	-64.963	-65.121	-65.125	-64.833	-64.827	-64.699	-64.779	-64.822	-64.844
-4.2607	-64.985	-65.148	-64.962	-65.003	-65.162	-65.167	-64.826	-64.844	-64.705	-64.787	-64.834	-64.866
-4.2587	-65.005	-65.182	-64.96	-65.026	-65.195	-65.199	-64.818	-64.886	-64.736	-64.815	-64.878	-64.909
-4.2567	-65.022	-65.194	-64.946	-65.03	-65.208	-65.212	-64.818	-64.934	-64.774	-64.846	-64.928	-64.953
-4.2547	-65.021	-65.189	-64.92	-65.02	-65.203	-65.209	-64.817	-64.98	-64.812	-64.873	-64.975	-64.993
-4.2527	-65.002	-65.159	-64.872	-64.986	-65.17	-65.183	-64.808	-65.022	-64.847	-64.896	-65.019	-65.029
-4.2507	-64.957	-65.089	-64.809	-64.927	-65.104	-65.124	-64.787	-65.048	-64.872	-64.913	-65.049	-65.052
-4.2487	-64.899	-64.999	-64.751	-64.856	-65.017	-65.044	-64.787	-65.062	-64.892	-64.934	-65.069	-65.065
-4.2467	-64.846	-64.907	-64.695	-64.787	-64.925	-64.959	-64.823	-65.065	-64.907	-64.953	-65.073	-65.065
-4.2447	-64.805	-64.84	-64.656	-64.743	-64.85	-64.889	-64.847	-65.055	-64.912	-64.962	-65.06	-65.052
-4.2427	-64.766	-64.779	-64.613	-64.703	-64.786	-64.825	-64.86	-65.04	-64.904	-64.96	-65.042	-65.038
-4.2407	-64.732	-64.736	-64.593	-64.68	-64.746	-64.773	-64.884	-65.028	-64.909	-64.965	-65.025	-65.027
-4.2387	-64.723	-64.733	-64.596	-64.679	-64.736	-64.751	-64.932	-65.038	-64.93	-64.983	-65.026	-65.033
-4.2367	-64.721	-64.756	-64.611	-64.694	-64.752	-64.754	-64.969	-65.061	-64.952	-64.999	-65.04	-65.051
-4.2347	-64.703	-64.787	-64.628	-64.712	-64.778	-64.768	-64.98	-65.085	-64.962	-65.007	-65.057	-65.076
-4.2327	-64.664	-64.806	-64.636	-64.714	-64.798	-64.777	-65.003	-65.118	-64.975	-65.021	-65.09	-65.112
-4.2307	-64.626	-64.818	-64.653	-64.712	-64.809	-64.778	-65.036	-65.16	-64.996	-65.043	-65.137	-65.155
-4.2287	-64.601	-64.829	-64.67	-64.717	-64.816	-64.782	-65.058	-65.198	-65.004	-65.058	-65.18	-65.196
-4.2267	-64.571	-64.829	-64.682	-64.724	-64.819	-64.782	-65.056	-65.212	-64.991	-65.057	-65.203	-65.216
-4.2247	-64.544	-64.802	-64.686	-64.717	-64.799	-64.76	-65.052	-65.204	-64.973	-65.051	-65.207	-65.217
-4.2227	-64.544	-64.759	-64.684	-64.702	-64.764	-64.723	-65.047	-65.185	-64.96	-65.04	-65.199	-65.205
-4.2207	-64.551	-64.705	-64.657	-64.675	-64.72	-64.677	-65.03	-65.155	-64.943	-65.02	-65.175	-65.177
-4.2187	-64.56	-64.657	-64.624	-64.654	-64.685	-64.648	-64.998	-65.106	-64.908	-64.982	-65.129	-65.127
-4.2167	-64.568	-64.618	-64.594	-64.631	-64.66	-64.631	-64.966	-65.052	-64.876	-64.944	-65.076	-65.071
-4.2147	-64.587	-64.59	-64.567	-64.613	-64.645	-64.625	-64.948	-65.008	-64.864	-64.917	-65.029	-65.02
-4.2127	-64.625	-64.605	-64.555	-64.615	-64.661	-64.649	-64.931	-64.973	-64.853	-64.893	-64.992	-64.978
-4.2107	-64.67	-64.657	-64.569	-64.645	-64.71	-64.707	-64.9	-64.932	-64.833	-64.863	-64.949	-64.928
-4.2087	-64.723	-64.739	-64.635	-64.701	-64.787	-64.791	-64.863	-64.886	-64.812	-64.836	-64.901	-64.875
-4.2067	-64.787	-64.839	-64.716	-64.769	-64.878	-64.884	-64.815	-64.84	-64.788	-64.807	-64.856	-64.826
-4.2047	-64.846	-64.929	-64.794	-64.835	-64.96	-64.965	-64.757	-64.789	-64.753	-64.769	-64.805	-64.771
-4.2027	-64.874	-64.992	-64.849	-64.88	-65.013	-65.01	-64.675	-64.724	-64.697	-64.714	-64.742	-64.696
-4.2007	-64.865	-65.005	-64.867	-64.889	-65.02	-65.006	-64.574	-64.656	-64.631	-64.651	-64.669	-64.611
-4.1987	-64.822	-64.976	-64.852	-64.864	-64.987	-64.962	-64.504	-64.612	-64.584	-64.61	-64.617	-64.554
-4.1967	-64.786	-64.925	-64.817	-64.837	-64.932	-64.896	-64.458	-64.587	-64.554	-64.585	-64.589	-64.522
-4.1947	-64.751	-64.868	-64.781	-64.812	-64.871	-64.824	-64.462	-64.59	-64.562	-64.593	-64.588	-64.522
-4.1927	-64.718	-64.822	-64.741	-64.777	-64.811	-64.761	-64.492	-64.612	-64.595	-64.627	-64.611	-64.546
-4.1907	-64.709	-64.795	-64.705	-64.745	-64.773	-64.734	-64.559	-64.656	-64.653	-64.681	-64.662	-64.612
-4.1887	-64.723	-64.804	-64.693	-64.737	-64.775	-64.753	-64.663	-64.717	-64.723	-64.754	-64.737	-64.704
-4.1867	-64.756	-64.837	-64.695	-64.746	-64.801	-64.797	-64.754	-64.77	-64.782	-64.815	-64.806	-64.786
-4.1847	-64.781	-64.878	-64.691	-64.748	-64.837	-64.85	-64.834	-64.823	-64.832	-64.867	-64.868	-64.859
-4.1827	-64.796	-64.91	-64.678	-64.74	-64.865	-64.896	-64.887	-64.863	-64.86	-64.902	-64.917	-64.915
-4.1807	-64.812	-64.939	-64.675	-64.748	-64.903	-64.94	-64.932	-64.901	-64.88	-64.928	-64.958	-64.964
-4.1787	-64.825	-64.98	-64.709	-64.789	-64.953	-64.986	-64.96	-64.943	-64.891	-64.948	-64.995	-65.001
-4.1767	-64.834	-65.018	-64.762	-64.841	-65.002	-65.028	-64.961	-64.982	-64.902	-64.957	-65.024	-65.03
-4.1747	-64.844	-65.05	-64.817	-64.893	-65.045	-65.065	-64.958	-65.018	-64.918	-64.968	-65.052	-65.057
-4.1727	-64.852	-65.078	-64.879	-64.946	-65.085	-65.098	-64.954	-65.045	-64.932	-64.976	-65.073	-65.079
-4.1707	-64.861	-65.106	-64.929	-64.994	-65.124	-65.13	-64.947	-65.069	-64.943	-64.982	-65.091	-65.096
-4.1687	-64.871	-65.126	-64.969	-65.031	-65.15	-65.155	-64.937	-65.092	-64.952	-64.984	-65.108	-65.113
-4.1667	-64.893	-65.125	-64.982	-65.043	-65.156	-65.16	-64.937	-65.106	-64.959	-64.989	-65.118	-65.123
-4.1647	-64.929	-65.116	-64.977	-65.043	-65.148	-65.153	-64.952	-65.103	-64.962	-64.994	-65.117	-65.119
-4.1627	-64.961	-65.112	-64.969	-65.04	-65.143	-65.148	-64.964	-65.095	-64.958	-64.993	-65.109	-65.109
-4.1607	-64.994	-65.108	-64.958	-65.037	-65.139	-65.144	-64.962	-65.08	-64.948	-64.983	-65.094	-65.092
-4.1587	-65.02	-65.105	-64.961	-65.037	-65.135	-65.14	-64.952	-65.058	-64.931	-64.964	-65.073	-65.069
-4.1567	-65.041	-65.101	-64.97	-65.038	-65.131	-65.136	-64.925	-65.021	-64.9	-64.929	-65.039	-65.033
-4.1547	-65.045	-65.106	-64.976	-65.037	-65.131	-65.136	-64.867	-64.969	-64.853	-64.875	-64.989	-64.981
-4.1527	-65.022	-65.11	-64.974	-65.027	-65.13	-65.135	-64.784	-64.918	-64.797	-64.812	-64.938	-64.931
-4.1507	-64.99	-65.1	-64.962	-65.003	-65.118	-65.123	-64.701	-64.865	-64.736	-64.744	-64.886	-64.879
-4.1487	-64.943	-65.077	-64.938	-64.964	-65.093	-65.098	-64.63	-64.819	-64.683	-64.685	-64.839	-64.833
-4.1467	-64.884	-65.04	-64.895	-64.906	-65.054	-65.06	-64.556	-64.776	-64.632	-64.63	-64.797	-64.791
-4.1447	-64.814	-64.992	-64.838	-64.831	-65.004	-65.009	-64.505	-64.745	-64.597	-64.594	-64.764	-64.759
-4.1427	-64.74	-64.929	-64.777	-64.753	-64.939	-64.942	-64.495	-64.735	-64.595	-64.586	-64.75	-64.75
-4.1407	-64.693	-64.872	-64.731	-64.691	-64.88	-64.877	-64.529	-64.751	-64.622	-64.612	-64.759	-64.766
-4.1387	-64.662	-64.828	-64.7	-64.649	-64.832	-64.82	-64.592	-64.797	-64.678	-64.672	-64.798	-64.811
-4.1367	-64.633	-64.804	-64.678	-64.622	-64.803	-64.782	-64.664	-64.861	-64.736	-64.741	-64.855	-64.875
-4.1347	-64.627	-64.799	-64.668	-64.627	-64.792	-64.76	-64.757	-64.938	-64.795	-64.821	-64.924	-64.951
-4.1327	-64.643	-64.816	-64.677	-64.661	-64.803	-64.762	-64.846	-65.017	-64.854	-64.903	-64.994	-65.03
-4.1307	-64.667	-64.861	-64.701	-64.71	-64.845	-64.797	-64.905	-65.087	-64.894	-64.967	-65.059	-65.098
-4.1287	-64.664	-64.902	-64.714	-64.745	-64.886	-64.84	-64.936	-65.142	-64.912	-65.007	-65.112	-65.151
-4.1267	-64.656	-64.941	-64.725	-64.777	-64.928	-64.886	-64.939	-65.167	-64.909	-65.017	-65.136	-65.175
-4.1247	-64.682	-64.975	-64.741	-64.811	-64.962	-64.924	-64.944	-65.17	-64.911	-65.021	-65.138	-65.176
-4.1227	-64.705	-65.005	-64.752	-64.823	-64.997	-64.966	-64.948	-65.165	-64.925	-65.021	-65.131	-65.169
-4.1207	-64.713	-65.013	-64.746	-64.816	-65.015	-64.992	-64.949	-65.154	-64.934	-65.008	-65.127	-65.158
-4.1187	-64.707	-64.998	-64.719	-64.791	-65.007	-64.99	-64.969	-65.148	-64.945	-64.999	-65.128	-65.154
-4.1167	-64.719	-64.978	-64.678	-64.763	-64.993	-64.978	-64.992	-65.143	-64.957	-64.99	-65.129	-65.15
-4.1147	-64.697	-64.952	-64.622	-64.722	-64.97	-64.957	-65.017	-65.144	-64.968	-64.981	-65.136	-65.152
-4.1127	-64.517	-64.908	-64.553	-64.661	-64.93	-64.927	-65.032	-65.15	-64.971	-64.97	-65.149	-65.16
-4.1107	-64.317	-64.846	-64.498	-64.61	-64.865	-64.871	-65.041	-65.158	-64.969	-64.964	-65.162	-65.169
-4.1087	-64.128	-64.801	-64.465	-64.571	-64.805	-64.816	-65.056	-65.172	-64.979	-64.979	-65.179	-65.183
-4.1067	-63.968	-64.769	-64.452	-64.551	-64.759	-64.774	-65.067	-65.188	-64.992	-64.999	-65.194	-65.198
-4.1047	-63.814	-64.744	-64.478	-64.55	-64.717	-64.739	-65.08	-65.203	-65.003	-65.024	-65.209	-65.213
-4.1027	-63.716	-64.721	-64.516	-64.563	-64.674	-64.705	-65.097	-65.217	-65.018	-65.056	-65.223	-65.227
-4.1007	-63.892	-64.727	-64.58	-64.613	-64.664	-64.694	-65.112	-65.229	-65.032	-65.085	-65.235	-65.239
-4.0987	-64.122	-64.774	-64.653	-64.684	-64.705	-64.729	-65.122	-65.234	-65.04	-65.106	-65.242	-65.246
-4.0967	-64.346	-64.827	-64.712	-64.745	-64.76	-64.788	-65.129	-65.23	-65.037	-65.111	-65.24	-65.244
-4.0947	-64.547	-64.877	-64.76	-64.793	-64.813	-64.846	-65.134	-65.222	-65.033	-65.113	-65.234	-65.239
-4.0927	-64.732	-64.92	-64.78	-64.819	-64.866	-64.898	-65.133	-65.2	-65.038	-65.111	-65.22	-65.225
-4.0907	-64.896	-64.972	-64.804	-64.846	-64.936	-64.96	-65.125	-65.174	-65.036	-65.103	-65.201	-65.206
-4.0887	-64.915	-65	-64.805	-64.846	-64.984	-65.002	-65.121	-65.151	-65.037	-65.099	-65.185	-65.19
-4.0867	-64.874	-64.979	-64.786	-64.816	-64.98	-64.993	-65.119	-65.139	-65.042	-65.099	-65.176	-65.181
-4.0847	-64.814	-64.926	-64.756	-64.781	-64.945	-64.947	-65.108	-65.128	-65.046	-65.098	-65.17	-65.175
-4.0827	-64.759	-64.869	-64.726	-64.748	-64.904	-64.894	-65.09	-65.113	-65.044	-65.092	-65.159	-65.163
-4.0807	-64.716	-64.82	-64.71	-64.735	-64.867	-64.848	-65.076	-65.117	-65.039	-65.087	-65.159	-65.163
-4.0787	-64.681	-64.772	-64.702	-64.727	-64.826	-64.802	-65.069	-65.129	-65.04	-65.089	-65.167	-65.172
-4.0767	-64.669	-64.744	-64.714	-64.735	-64.8	-64.77	-65.064	-65.143	-65.043	-65.092	-65.177	-65.182
-4.0747	-64.703	-64.765	-64.741	-64.762	-64.814	-64.783	-65.058	-65.15	-65.043	-65.093	-65.183	-65.188
-4.0727	-64.779	-64.823	-64.792	-64.812	-64.86	-64.826	-65.059	-65.16	-65.043	-65.093	-65.189	-65.193
-4.0707	-64.861	-64.89	-64.853	-64.873	-64.916	-64.878	-65.06	-65.174	-65.046	-65.097	-65.199	-65.203
-4.0687	-64.933	-64.952	-64.903	-64.92	-64.968	-64.928	-65.051	-65.176	-65.043	-65.091	-65.198	-65.2
-4.0667	-64.978	-64.995	-64.917	-64.937	-64.999	-64.953	-65.027	-65.168	-65.028	-65.072	-65.186	-65.186
-4.0647	-64.981	-65.01	-64.897	-64.914	-65.005	-64.96	-64.987	-65.145	-64.999	-65.038	-65.158	-65.156
-4.0627	-64.954	-64.99	-64.863	-64.882	-64.975	-64.936	-64.936	-65.107	-64.952	-64.989	-65.116	-65.112
-4.0607	-64.847	-64.95	-64.816	-64.834	-64.932	-64.904	-64.884	-65.06	-64.897	-64.936	-65.067	-65.061
-4.0587	-64.639	-64.888	-64.739	-64.75	-64.868	-64.852	-64.838	-65.008	-64.837	-64.879	-65.012	-65.006
-4.0567	-64.348	-64.802	-64.635	-64.635	-64.78	-64.777	-64.803	-64.966	-64.781	-64.832	-64.97	-64.966
-4.0547	-63.902	-64.696	-64.525	-64.505	-64.676	-64.689	-64.787	-64.936	-64.741	-64.805	-64.942	-64.94
-4.0527	-63.321	-64.568	-64.392	-64.359	-64.552	-64.579	-64.796	-64.926	-64.722	-64.799	-64.935	-64.935
-4.0507	-62.591	-64.412	-64.221	-64.167	-64.411	-64.441	-64.828	-64.942	-64.738	-64.821	-64.953	-64.955
-4.0487	-61.844	-64.222	-64.009	-63.929	-64.232	-64.26	-64.871	-64.978	-64.778	-64.862	-64.99	-64.995
-4.0467	-61.264	-64.031	-63.821	-63.72	-64.05	-64.077	-64.916	-65.022	-64.829	-64.912	-65.03	-65.041
-4.0447	-60.848	-63.871	-63.692	-63.571	-63.898	-63.923	-64.961	-65.061	-64.889	-64.963	-65.065	-65.08
-4.0427	-60.768	-63.772	-63.625	-63.502	-63.804	-63.822	-65.002	-65.085	-64.942	-65.006	-65.085	-65.102
-4.0407	-61.013	-63.746	-63.642	-63.521	-63.78	-63.787	-65.03	-65.104	-64.983	-65.036	-65.096	-65.116
-4.0387	-61.555	-63.796	-63.736	-63.625	-63.825	-63.826	-65.042	-65.107	-65	-65.048	-65.092	-65.114
-4.0367	-62.292	-63.926	-63.904	-63.818	-63.95	-63.944	-65.029	-65.083	-64.99	-65.031	-65.062	-65.084
-4.0347	-62.984	-64.097	-64.093	-64.034	-64.12	-64.107	-65.002	-65.048	-64.969	-65.002	-65.034	-65.047
-4.0327	-63.608	-64.281	-64.263	-64.235	-64.301	-64.281	-64.961	-65.003	-64.934	-64.964	-64.999	-65.004
-4.0307	-64.09	-64.457	-64.417	-64.409	-64.476	-64.453	-64.92	-64.975	-64.902	-64.927	-64.978	-64.979
-4.0287	-64.438	-64.628	-64.561	-64.566	-64.645	-64.625	-64.888	-64.955	-64.879	-64.9	-64.967	-64.962
-4.0267	-64.66	-64.772	-64.681	-64.703	-64.787	-64.768	-64.868	-64.948	-64.87	-64.888	-64.969	-64.961
-4.0247	-64.628	-64.871	-64.767	-64.797	-64.886	-64.866	-64.885	-64.969	-64.891	-64.912	-65	-64.991
-4.0227	-64.404	-64.912	-64.785	-64.811	-64.925	-64.904	-64.918	-64.996	-64.923	-64.948	-65.029	-65.022
-4.0207	-64.126	-64.883	-64.76	-64.777	-64.897	-64.872	-64.955	-65.038	-64.956	-64.987	-65.067	-65.061
-4.0187	-63.792	-64.794	-64.692	-64.696	-64.811	-64.779	-64.981	-65.065	-64.981	-65.017	-65.091	-65.085
-4.0167	-63.358	-64.655	-64.573	-64.565	-64.674	-64.634	-64.993	-65.076	-64.995	-65.033	-65.1	-65.094
-4.0147	-62.81	-64.493	-64.415	-64.384	-64.514	-64.472	-64.99	-65.066	-64.992	-65.032	-65.088	-65.079
-4.0127	-62.504	-64.336	-64.262	-64.216	-64.359	-64.319	-64.955	-65.031	-64.961	-64.998	-65.05	-65.039
-4.0107	-62.42	-64.234	-64.176	-64.13	-64.258	-64.218	-64.91	-64.995	-64.922	-64.956	-65.011	-64.997
-4.0087	-62.361	-64.195	-64.125	-64.083	-64.215	-64.182	-64.883	-64.955	-64.889	-64.92	-64.971	-64.953
-4.0067	-62.346	-64.203	-64.105	-64.072	-64.214	-64.195	-64.869	-64.92	-64.858	-64.891	-64.937	-64.917
-4.0047	-62.46	-64.231	-64.12	-64.093	-64.229	-64.227	-64.86	-64.895	-64.833	-64.869	-64.913	-64.89
-4.0027	-62.777	-64.29	-64.189	-64.175	-64.27	-64.284	-64.864	-64.888	-64.821	-64.861	-64.908	-64.885
-4.0007	-63.031	-64.367	-64.275	-64.267	-64.329	-64.356	-64.887	-64.904	-64.827	-64.871	-64.923	-64.9
-3.9987	-63.343	-64.435	-64.365	-64.353	-64.381	-64.427	-64.911	-64.931	-64.833	-64.882	-64.946	-64.932
-3.9967	-63.729	-64.513	-64.478	-64.465	-64.443	-64.508	-64.921	-64.959	-64.838	-64.888	-64.968	-64.965
-3.9947	-63.988	-64.59	-64.573	-64.551	-64.517	-64.59	-64.922	-64.993	-64.851	-64.894	-64.992	-64.999
-3.9927	-64.041	-64.638	-64.607	-64.574	-64.569	-64.644	-64.916	-65.024	-64.862	-64.898	-65.015	-65.031
-3.9907	-63.955	-64.639	-64.588	-64.538	-64.583	-64.655	-64.901	-65.044	-64.861	-64.892	-65.026	-65.051
-3.9887	-63.774	-64.603	-64.538	-64.468	-64.56	-64.63	-64.877	-65.048	-64.856	-64.882	-65.022	-65.053
-3.9867	-63.382	-64.537	-64.438	-64.346	-64.503	-64.569	-64.862	-65.047	-64.858	-64.883	-65.022	-65.047
-3.9847	-62.921	-64.435	-64.302	-64.181	-64.412	-64.469	-64.863	-65.056	-64.866	-64.897	-65.034	-65.052
-3.9827	-62.7	-64.332	-64.195	-64.059	-64.312	-64.364	-64.879	-65.067	-64.875	-64.915	-65.05	-65.061
-3.9807	-62.749	-64.301	-64.188	-64.05	-64.28	-64.328	-64.909	-65.08	-64.886	-64.935	-65.068	-65.071
-3.9787	-62.769	-64.302	-64.202	-64.064	-64.279	-64.325	-64.943	-65.099	-64.905	-64.959	-65.09	-65.086
-3.9767	-62.851	-64.303	-64.213	-64.08	-64.278	-64.322	-64.98	-65.127	-64.921	-64.984	-65.124	-65.117
-3.9747	-63.119	-64.33	-64.264	-64.144	-64.308	-64.345	-65.013	-65.156	-64.938	-65.002	-65.156	-65.15
-3.9727	-63.412	-64.385	-64.34	-64.238	-64.37	-64.398	-65.029	-65.17	-64.94	-65.005	-65.17	-65.163
-3.9707	-63.561	-64.439	-64.395	-64.31	-64.434	-64.453	-65.038	-65.173	-64.939	-65.009	-65.175	-65.165
-3.9687	-63.437	-64.433	-64.365	-64.287	-64.439	-64.45	-65.048	-65.174	-64.94	-65.016	-65.178	-65.167
-3.9667	-63.368	-64.418	-64.329	-64.258	-64.429	-64.436	-65.06	-65.176	-64.949	-65.026	-65.183	-65.17
-3.9647	-63.195	-64.41	-64.292	-64.22	-64.429	-64.432	-65.07	-65.176	-64.958	-65.037	-65.184	-65.168
-3.9627	-62.914	-64.378	-64.227	-64.153	-64.403	-64.406	-65.072	-65.167	-64.955	-65.041	-65.177	-65.159
-3.9607	-62.627	-64.338	-64.159	-64.083	-64.362	-64.368	-65.078	-65.165	-64.966	-65.053	-65.178	-65.161
-3.9587	-62.28	-64.285	-64.087	-63.995	-64.31	-64.319	-65.081	-65.164	-64.976	-65.061	-65.178	-65.16
-3.9567	-62.011	-64.216	-64.022	-63.913	-64.247	-64.259	-65.076	-65.163	-64.979	-65.061	-65.173	-65.151
-3.9547	-61.658	-64.109	-63.922	-63.802	-64.153	-64.166	-65.06	-65.147	-64.968	-65.05	-65.152	-65.123
-3.9527	-61.389	-63.985	-63.822	-63.697	-64.04	-64.055	-65.038	-65.118	-64.951	-65.031	-65.119	-65.08
-3.9507	-60.999	-63.839	-63.706	-63.566	-63.901	-63.923	-65.017	-65.088	-64.941	-65.014	-65.083	-65.035
-3.9487	-60.409	-63.623	-63.522	-63.358	-63.685	-63.718	-64.983	-65.051	-64.916	-64.985	-65.042	-64.986
-3.9467	-59.948	-63.367	-63.326	-63.14	-63.424	-63.464	-64.946	-65.015	-64.88	-64.952	-65.003	-64.944
-3.9447	-59.702	-63.166	-63.188	-62.989	-63.196	-63.247	-64.905	-64.972	-64.832	-64.907	-64.965	-64.91
-3.9427	-59.691	-63.063	-63.154	-62.93	-63.058	-63.12	-64.863	-64.933	-64.783	-64.862	-64.934	-64.891
-3.9407	-59.82	-63.04	-63.182	-62.941	-62.997	-63.069	-64.819	-64.891	-64.735	-64.816	-64.897	-64.872
-3.9387	-60.255	-63.116	-63.285	-63.041	-63.044	-63.114	-64.774	-64.838	-64.681	-64.762	-64.847	-64.837
-3.9367	-61.096	-63.336	-63.505	-63.287	-63.25	-63.312	-64.741	-64.778	-64.637	-64.711	-64.782	-64.786
-3.9347	-61.953	-63.664	-63.787	-63.605	-63.573	-63.632	-64.704	-64.713	-64.605	-64.658	-64.71	-64.725
-3.9327	-62.71	-64.016	-64.063	-63.916	-63.942	-63.989	-64.676	-64.661	-64.593	-64.624	-64.646	-64.668
-3.9307	-63.139	-64.302	-64.25	-64.142	-64.253	-64.288	-64.659	-64.628	-64.589	-64.603	-64.595	-64.619
-3.9287	-63.181	-64.491	-64.344	-64.263	-64.471	-64.494	-64.659	-64.621	-64.599	-64.596	-64.58	-64.597
-3.9267	-62.722	-64.538	-64.308	-64.237	-64.544	-64.563	-64.678	-64.647	-64.624	-64.612	-64.602	-64.618
-3.9247	-61.949	-64.433	-64.153	-64.062	-64.457	-64.475	-64.699	-64.698	-64.653	-64.642	-64.654	-64.673
-3.9227	-61.042	-64.222	-63.927	-63.804	-64.261	-64.276	-64.725	-64.759	-64.683	-64.685	-64.719	-64.739
-3.9207	-60.05	-63.938	-63.647	-63.492	-63.984	-64	-64.754	-64.819	-64.717	-64.727	-64.783	-64.805
-3.9187	-59.442	-63.687	-63.437	-63.263	-63.733	-63.75	-64.782	-64.875	-64.757	-64.771	-64.847	-64.872
-3.9167	-59.315	-63.529	-63.322	-63.142	-63.572	-63.59	-64.797	-64.92	-64.79	-64.813	-64.893	-64.924
-3.9147	-59.652	-63.505	-63.336	-63.165	-63.543	-63.56	-64.798	-64.947	-64.81	-64.84	-64.922	-64.956
-3.9127	-59.953	-63.571	-63.417	-63.257	-63.606	-63.623	-64.808	-64.972	-64.834	-64.866	-64.951	-64.98
-3.9107	-60.132	-63.644	-63.475	-63.324	-63.678	-63.694	-64.834	-65.004	-64.866	-64.897	-64.989	-65.013
-3.9087	-60.293	-63.714	-63.524	-63.381	-63.748	-63.764	-64.862	-65.04	-64.891	-64.927	-65.03	-65.049
-3.9067	-60.146	-63.732	-63.507	-63.356	-63.769	-63.785	-64.889	-65.07	-64.903	-64.946	-65.066	-65.08
-3.9047	-59.729	-63.672	-63.417	-63.249	-63.714	-63.731	-64.919	-65.093	-64.907	-64.955	-65.095	-65.105
-3.9027	-59.14	-63.531	-63.256	-63.065	-63.577	-63.595	-64.944	-65.112	-64.913	-64.964	-65.12	-65.125
-3.9007	-58.837	-63.365	-63.104	-62.903	-63.411	-63.427	-64.952	-65.118	-64.892	-64.954	-65.127	-65.132
-3.8987	-58.833	-63.265	-63.04	-62.838	-63.308	-63.321	-64.942	-65.108	-64.855	-64.928	-65.117	-65.122
-3.8967	-58.943	-63.212	-63.017	-62.814	-63.253	-63.264	-64.925	-65.087	-64.818	-64.899	-65.097	-65.103
-3.8947	-59.145	-63.206	-63.03	-62.836	-63.243	-63.252	-64.912	-65.069	-64.795	-64.882	-65.08	-65.085
-3.8927	-59.177	-63.203	-63.025	-62.832	-63.24	-63.246	-64.913	-65.061	-64.794	-64.882	-65.07	-65.073
-3.8907	-59.314	-63.214	-63.041	-62.851	-63.249	-63.254	-64.924	-65.062	-64.796	-64.886	-65.07	-65.07
-3.8887	-59.258	-63.233	-63.054	-62.86	-63.272	-63.277	-64.949	-65.071	-64.83	-64.912	-65.077	-65.075
-3.8867	-59.193	-63.227	-63.042	-62.845	-63.27	-63.273	-64.978	-65.082	-64.862	-64.937	-65.085	-65.077
-3.8847	-59.202	-63.243	-63.087	-62.881	-63.285	-63.285	-64.99	-65.08	-64.871	-64.934	-65.079	-65.065
-3.8827	-59.354	-63.283	-63.159	-62.94	-63.323	-63.321	-64.975	-65.053	-64.848	-64.897	-65.05	-65.029
-3.8807	-59.986	-63.402	-63.346	-63.132	-63.428	-63.428	-64.936	-65.008	-64.803	-64.839	-65.003	-64.983
-3.8787	-60.416	-63.564	-63.546	-63.34	-63.58	-63.584	-64.893	-64.95	-64.755	-64.78	-64.939	-64.923
-3.8767	-60.784	-63.703	-63.689	-63.489	-63.706	-63.716	-64.831	-64.879	-64.689	-64.7	-64.864	-64.852
-3.8747	-60.954	-63.813	-63.795	-63.591	-63.806	-63.826	-64.771	-64.815	-64.644	-64.637	-64.796	-64.795
-3.8727	-60.695	-63.825	-63.769	-63.558	-63.812	-63.848	-64.744	-64.784	-64.64	-64.621	-64.76	-64.771
-3.8707	-60.263	-63.737	-63.667	-63.444	-63.717	-63.769	-64.753	-64.791	-64.664	-64.649	-64.763	-64.785
-3.8687	-59.593	-63.562	-63.472	-63.23	-63.556	-63.614	-64.782	-64.82	-64.703	-64.692	-64.79	-64.818
-3.8667	-59.17	-63.363	-63.293	-63.035	-63.368	-63.43	-64.819	-64.871	-64.75	-64.743	-64.847	-64.874
-3.8647	-58.867	-63.215	-63.193	-62.925	-63.234	-63.297	-64.878	-64.943	-64.812	-64.818	-64.925	-64.95
-3.8627	-58.716	-63.106	-63.127	-62.862	-63.137	-63.201	-64.947	-65.02	-64.87	-64.895	-65.009	-65.027
-3.8607	-58.971	-63.091	-63.149	-62.912	-63.137	-63.192	-65.001	-65.076	-64.912	-64.953	-65.072	-65.083
-3.8587	-59.085	-63.137	-63.187	-62.974	-63.205	-63.248	-65.043	-65.116	-64.956	-65.003	-65.12	-65.123
-3.8567	-58.965	-63.186	-63.201	-63	-63.261	-63.299	-65.085	-65.154	-65	-65.052	-65.162	-65.159
-3.8547	-58.628	-63.178	-63.127	-62.929	-63.26	-63.293	-65.12	-65.179	-65.039	-65.095	-65.183	-65.181
-3.8527	-58.424	-63.131	-63.018	-62.825	-63.211	-63.239	-65.138	-65.185	-65.06	-65.117	-65.185	-65.185
-3.8507	-58.136	-63.075	-62.912	-62.712	-63.154	-63.177	-65.129	-65.163	-65.053	-65.105	-65.16	-65.163
-3.8487	-57.885	-62.994	-62.825	-62.598	-63.069	-63.092	-65.106	-65.138	-65.034	-65.079	-65.13	-65.137
-3.8467	-57.943	-62.947	-62.796	-62.562	-63.005	-63.034	-65.074	-65.107	-64.994	-65.039	-65.094	-65.106
-3.8447	-58.275	-62.951	-62.835	-62.602	-62.994	-63.024	-65.033	-65.064	-64.944	-64.989	-65.047	-65.064
-3.8427	-58.835	-63.036	-62.969	-62.743	-63.063	-63.093	-64.988	-65.022	-64.894	-64.937	-65.011	-65.025
-3.8407	-59.157	-63.146	-63.118	-62.891	-63.159	-63.194	-64.952	-64.988	-64.854	-64.897	-64.985	-64.994
-3.8387	-59.457	-63.22	-63.225	-63	-63.22	-63.262	-64.947	-64.993	-64.85	-64.9	-64.992	-65
-3.8367	-59.53	-63.271	-63.276	-63.054	-63.255	-63.302	-64.963	-65.017	-64.865	-64.92	-65.021	-65.027
-3.8347	-59.463	-63.285	-63.296	-63.059	-63.269	-63.312	-64.97	-65.038	-64.887	-64.936	-65.049	-65.053
-3.8327	-59.252	-63.268	-63.282	-63.033	-63.255	-63.302	-64.969	-65.051	-64.901	-64.942	-65.07	-65.071
-3.8307	-58.883	-63.195	-63.211	-62.945	-63.181	-63.236	-64.959	-65.055	-64.908	-64.941	-65.076	-65.079
-3.8287	-58.521	-63.077	-63.099	-62.817	-63.071	-63.125	-64.933	-65.042	-64.901	-64.925	-65.066	-65.072
-3.8267	-58.316	-63.001	-63.031	-62.736	-62.997	-63.047	-64.881	-64.992	-64.864	-64.875	-65.026	-65.032
-3.8247	-58.35	-62.98	-63.026	-62.729	-62.977	-63.025	-64.818	-64.925	-64.816	-64.817	-64.967	-64.974
-3.8227	-58.455	-63.008	-63.058	-62.767	-63	-63.05	-64.786	-64.878	-64.784	-64.787	-64.922	-64.929
-3.8207	-58.817	-63.081	-63.124	-62.853	-63.061	-63.114	-64.774	-64.849	-64.776	-64.784	-64.898	-64.905
-3.8187	-59.432	-63.237	-63.272	-63.037	-63.214	-63.26	-64.774	-64.829	-64.769	-64.788	-64.884	-64.891
-3.8167	-60.411	-63.492	-63.512	-63.335	-63.462	-63.504	-64.788	-64.828	-64.764	-64.8	-64.882	-64.887
-3.8147	-61.342	-63.778	-63.773	-63.657	-63.746	-63.781	-64.821	-64.856	-64.785	-64.834	-64.903	-64.902
-3.8127	-62.065	-64.027	-63.988	-63.926	-63.998	-64.029	-64.866	-64.895	-64.817	-64.879	-64.936	-64.932
-3.8107	-62.637	-64.186	-64.118	-64.102	-64.166	-64.193	-64.899	-64.925	-64.841	-64.912	-64.966	-64.957
-3.8087	-62.983	-64.277	-64.201	-64.212	-64.276	-64.292	-64.934	-64.957	-64.856	-64.936	-64.992	-64.977
-3.8067	-63.071	-64.29	-64.197	-64.217	-64.308	-64.317	-64.972	-64.987	-64.88	-64.965	-65.015	-64.989
-3.8047	-62.871	-64.232	-64.134	-64.135	-64.264	-64.269	-65.005	-65.011	-64.916	-64.996	-65.034	-65.001
-3.8027	-62.488	-64.12	-64.015	-63.984	-64.168	-64.174	-65.032	-65.024	-64.94	-65.017	-65.049	-65.015
-3.8007	-62.146	-63.978	-63.866	-63.803	-64.03	-64.041	-65.036	-65.029	-64.946	-65.018	-65.052	-65.015
-3.7987	-61.939	-63.887	-63.779	-63.688	-63.931	-63.948	-65.023	-65.026	-64.939	-65.005	-65.042	-65.003
-3.7967	-61.822	-63.838	-63.731	-63.615	-63.868	-63.894	-64.999	-65.013	-64.929	-64.985	-65.024	-64.986
-3.7947	-61.803	-63.838	-63.753	-63.617	-63.851	-63.886	-64.972	-65.008	-64.924	-64.968	-65.017	-64.989
-3.7927	-61.818	-63.863	-63.789	-63.647	-63.862	-63.902	-64.943	-65.013	-64.916	-64.952	-65.021	-65.002
-3.7907	-62.091	-63.925	-63.875	-63.741	-63.905	-63.947	-64.918	-65.023	-64.911	-64.942	-65.027	-65.014
-3.7887	-62.38	-64.058	-64.027	-63.904	-64.03	-64.067	-64.921	-65.044	-64.925	-64.955	-65.047	-65.04
-3.7867	-62.585	-64.194	-64.149	-64.039	-64.172	-64.199	-64.944	-65.07	-64.952	-64.983	-65.075	-65.072
-3.7847	-62.627	-64.304	-64.224	-64.132	-64.289	-64.307	-64.966	-65.093	-64.977	-65.009	-65.099	-65.101
-3.7827	-62.569	-64.357	-64.226	-64.151	-64.35	-64.359	-64.975	-65.098	-64.983	-65.015	-65.099	-65.105
-3.7807	-62.407	-64.363	-64.183	-64.121	-64.367	-64.372	-64.983	-65.086	-64.979	-65.01	-65.082	-65.09
-3.7787	-61.908	-64.294	-64.059	-63.995	-64.317	-64.32	-64.982	-65.063	-64.968	-64.996	-65.055	-65.066
-3.7767	-61.272	-64.122	-63.846	-63.772	-64.16	-64.165	-64.946	-65.025	-64.938	-64.956	-65.013	-65.027
-3.7747	-60.757	-63.913	-63.649	-63.559	-63.961	-63.97	-64.898	-64.991	-64.9	-64.908	-64.972	-64.993
-3.7727	-60.426	-63.722	-63.504	-63.393	-63.779	-63.792	-64.86	-64.971	-64.872	-64.872	-64.949	-64.973
-3.7707	-60.165	-63.575	-63.415	-63.277	-63.641	-63.658	-64.844	-64.972	-64.864	-64.864	-64.949	-64.975
-3.7687	-60.06	-63.476	-63.374	-63.214	-63.545	-63.562	-64.844	-64.989	-64.87	-64.867	-64.964	-64.992
-3.7667	-60.377	-63.473	-63.44	-63.272	-63.537	-63.549	-64.855	-65.015	-64.883	-64.883	-64.989	-65.019
-3.7647	-60.974	-63.588	-63.612	-63.457	-63.645	-63.653	-64.903	-65.052	-64.915	-64.922	-65.018	-65.055
-3.7627	-61.52	-63.759	-63.805	-63.667	-63.813	-63.817	-64.957	-65.087	-64.952	-64.967	-65.047	-65.088
-3.7607	-62.091	-63.956	-63.998	-63.888	-63.997	-64.001	-64.991	-65.108	-64.977	-64.998	-65.061	-65.108
-3.7587	-62.595	-64.146	-64.169	-64.091	-64.172	-64.179	-65.005	-65.102	-64.985	-65.009	-65.056	-65.096
-3.7567	-62.875	-64.292	-64.28	-64.23	-64.309	-64.32	-64.999	-65.068	-64.981	-65.01	-65.027	-65.059
-3.7547	-62.675	-64.341	-64.277	-64.235	-64.356	-64.376	-64.978	-65.015	-64.958	-64.993	-64.983	-65.005
-3.7527	-62.226	-64.263	-64.163	-64.103	-64.272	-64.301	-64.934	-64.957	-64.922	-64.96	-64.941	-64.948
-3.7507	-61.732	-64.122	-64.011	-63.928	-64.123	-64.16	-64.889	-64.895	-64.884	-64.925	-64.891	-64.885
-3.7487	-60.941	-63.929	-63.807	-63.689	-63.938	-63.974	-64.869	-64.841	-64.854	-64.898	-64.846	-64.829
-3.7467	-60.014	-63.678	-63.548	-63.385	-63.701	-63.734	-64.865	-64.825	-64.838	-64.888	-64.831	-64.819
-3.7447	-59.317	-63.429	-63.329	-63.12	-63.463	-63.489	-64.881	-64.859	-64.842	-64.896	-64.858	-64.855
-3.7427	-59.01	-63.244	-63.188	-62.954	-63.284	-63.304	-64.923	-64.925	-64.88	-64.933	-64.916	-64.922
-3.7407	-58.958	-63.173	-63.156	-62.915	-63.219	-63.233	-64.981	-65	-64.932	-64.985	-64.98	-64.997
-3.7387	-58.947	-63.178	-63.17	-62.928	-63.228	-63.235	-65.039	-65.075	-64.985	-65.039	-65.051	-65.074
-3.7367	-59.321	-63.231	-63.229	-63.002	-63.276	-63.281	-65.082	-65.14	-65.03	-65.085	-65.115	-65.143
-3.7347	-59.917	-63.379	-63.385	-63.192	-63.415	-63.417	-65.105	-65.173	-65.059	-65.112	-65.148	-65.174
-3.7327	-60.277	-63.549	-63.525	-63.361	-63.579	-63.581	-65.108	-65.161	-65.06	-65.114	-65.14	-65.161
-3.7307	-60.46	-63.681	-63.623	-63.472	-63.704	-63.707	-65.084	-65.122	-65.028	-65.087	-65.102	-65.119
-3.7287	-60.416	-63.737	-63.638	-63.493	-63.751	-63.76	-65.04	-65.07	-64.972	-65.04	-65.055	-65.066
-3.7267	-60.315	-63.714	-63.587	-63.448	-63.726	-63.741	-64.991	-65.025	-64.91	-64.988	-65.015	-65.022
-3.7247	-60.059	-63.652	-63.513	-63.368	-63.663	-63.684	-64.951	-64.995	-64.855	-64.943	-64.986	-64.988
-3.7227	-59.925	-63.555	-63.408	-63.248	-63.565	-63.591	-64.933	-64.984	-64.816	-64.917	-64.978	-64.978
-3.7207	-59.909	-63.46	-63.309	-63.14	-63.467	-63.499	-64.932	-64.999	-64.802	-64.911	-64.996	-64.996
-3.7187	-59.969	-63.388	-63.239	-63.071	-63.396	-63.425	-64.947	-65.029	-64.808	-64.922	-65.031	-65.031
-3.7167	-60.047	-63.354	-63.204	-63.034	-63.372	-63.395	-64.954	-65.066	-64.836	-64.942	-65.071	-65.072
-3.7147	-60.101	-63.355	-63.203	-63.019	-63.376	-63.394	-64.961	-65.094	-64.874	-64.966	-65.099	-65.097
-3.7127	-60.146	-63.371	-63.205	-63.014	-63.396	-63.408	-64.962	-65.112	-64.904	-64.983	-65.116	-65.112
-3.7107	-60.051	-63.378	-63.208	-63.008	-63.408	-63.416	-64.949	-65.118	-64.925	-64.989	-65.121	-65.114
-3.7087	-60.169	-63.413	-63.268	-63.065	-63.443	-63.444	-64.927	-65.112	-64.936	-64.986	-65.115	-65.103
-3.7067	-60.377	-63.483	-63.355	-63.153	-63.51	-63.51	-64.898	-65.098	-64.936	-64.978	-65.099	-65.081
-3.7047	-60.8	-63.583	-63.481	-63.292	-63.594	-63.597	-64.909	-65.08	-64.935	-64.977	-65.078	-65.054
-3.7027	-61.447	-63.732	-63.657	-63.494	-63.729	-63.735	-64.927	-65.068	-64.932	-64.979	-65.064	-65.039
-3.7007	-62.064	-63.908	-63.856	-63.718	-63.892	-63.9	-64.943	-65.063	-64.933	-64.984	-65.058	-65.032
-3.6987	-62.436	-64.07	-64.019	-63.898	-64.044	-64.055	-64.961	-65.061	-64.935	-64.99	-65.054	-65.029
-3.6967	-62.402	-64.152	-64.076	-63.958	-64.121	-64.139	-64.983	-65.061	-64.945	-65.001	-65.053	-65.028
-3.6947	-62.117	-64.159	-64.057	-63.928	-64.131	-64.156	-65.006	-65.067	-64.961	-65.015	-65.059	-65.037
-3.6927	-61.487	-64.092	-63.951	-63.798	-64.08	-64.104	-65.005	-65.081	-64.973	-65.024	-65.075	-65.058
-3.6907	-60.597	-63.931	-63.752	-63.566	-63.934	-63.957	-64.974	-65.08	-64.975	-65.021	-65.08	-65.066
-3.6887	-59.658	-63.699	-63.51	-63.288	-63.713	-63.74	-64.935	-65.056	-64.954	-65	-65.066	-65.054
-3.6867	-58.913	-63.422	-63.259	-63	-63.448	-63.476	-64.871	-65.01	-64.913	-64.958	-65.031	-65.022
-3.6847	-58.587	-63.196	-63.089	-62.803	-63.229	-63.255	-64.79	-64.952	-64.858	-64.903	-64.984	-64.978
-3.6827	-58.432	-63.034	-62.982	-62.684	-63.069	-63.093	-64.702	-64.88	-64.795	-64.838	-64.918	-64.916
-3.6807	-58.524	-62.922	-62.918	-62.623	-62.953	-62.978	-64.621	-64.799	-64.726	-64.771	-64.838	-64.842
-3.6787	-58.762	-62.883	-62.927	-62.636	-62.911	-62.941	-64.59	-64.744	-64.67	-64.72	-64.773	-64.787
-3.6767	-59.07	-62.895	-62.958	-62.676	-62.936	-62.961	-64.593	-64.734	-64.664	-64.709	-64.746	-64.77
-3.6747	-59.646	-63.022	-63.073	-62.819	-63.064	-63.087	-64.648	-64.768	-64.695	-64.738	-64.76	-64.793
-3.6727	-60.156	-63.206	-63.219	-62.996	-63.253	-63.274	-64.722	-64.82	-64.733	-64.776	-64.794	-64.836
-3.6707	-60.732	-63.411	-63.381	-63.189	-63.463	-63.481	-64.809	-64.89	-64.779	-64.825	-64.854	-64.899
-3.6687	-61.293	-63.636	-63.593	-63.421	-63.69	-63.704	-64.897	-64.972	-64.835	-64.881	-64.933	-64.976
-3.6667	-61.767	-63.85	-63.789	-63.639	-63.906	-63.914	-64.966	-65.049	-64.888	-64.934	-65.015	-65.051
-3.6647	-62.244	-64.064	-63.974	-63.855	-64.106	-64.111	-65.012	-65.1	-64.912	-64.961	-65.07	-65.102
-3.6627	-62.349	-64.229	-64.113	-64.011	-64.264	-64.265	-65.03	-65.124	-64.913	-64.969	-65.099	-65.128
-3.6607	-62.04	-64.293	-64.146	-64.044	-64.324	-64.323	-65.046	-65.145	-64.92	-64.986	-65.124	-65.151
-3.6587	-61.361	-64.238	-64.064	-63.95	-64.267	-64.265	-65.06	-65.162	-64.926	-65	-65.141	-65.167
-3.6567	-60.532	-64.089	-63.89	-63.758	-64.112	-64.118	-65.072	-65.175	-64.934	-65.014	-65.15	-65.179
-3.6547	-59.617	-63.872	-63.656	-63.49	-63.891	-63.907	-65.085	-65.185	-64.951	-65.029	-65.156	-65.185
-3.6527	-58.634	-63.607	-63.409	-63.189	-63.624	-63.651	-65.103	-65.204	-64.969	-65.051	-65.178	-65.198
-3.6507	-57.849	-63.297	-63.125	-62.859	-63.306	-63.347	-65.127	-65.229	-64.997	-65.079	-65.208	-65.218
-3.6487	-57.62	-63.047	-62.929	-62.628	-63.041	-63.095	-65.148	-65.252	-65.021	-65.1	-65.236	-65.237
-3.6467	-57.962	-62.919	-62.868	-62.548	-62.891	-62.962	-65.164	-65.269	-65.04	-65.116	-65.257	-65.249
-3.6447	-58.586	-62.916	-62.913	-62.589	-62.876	-62.952	-65.168	-65.274	-65.042	-65.113	-65.267	-65.25
-3.6427	-59.335	-63.018	-63.046	-62.738	-62.966	-63.044	-65.151	-65.258	-65.022	-65.091	-65.256	-65.233
-3.6407	-60.215	-63.179	-63.216	-62.947	-63.119	-63.197	-65.123	-65.228	-64.997	-65.059	-65.226	-65.204
-3.6387	-61.096	-63.411	-63.458	-63.221	-63.356	-63.427	-65.085	-65.184	-64.969	-65.013	-65.183	-65.16
-3.6367	-61.689	-63.652	-63.692	-63.487	-63.606	-63.669	-65.04	-65.133	-64.933	-64.96	-65.132	-65.108
-3.6347	-61.873	-63.857	-63.859	-63.683	-63.828	-63.874	-64.995	-65.082	-64.898	-64.909	-65.081	-65.057
-3.6327	-61.722	-63.973	-63.936	-63.779	-63.954	-63.994	-64.961	-65.042	-64.875	-64.874	-65.04	-65.016
-3.6307	-61.694	-64.009	-63.951	-63.81	-63.993	-64.03	-64.944	-65.024	-64.869	-64.855	-65.022	-65.001
-3.6287	-61.539	-64.027	-63.961	-63.821	-64.008	-64.046	-64.943	-65.021	-64.874	-64.854	-65.021	-65.003
-3.6267	-61.111	-63.987	-63.896	-63.755	-63.959	-63.999	-64.956	-65.032	-64.888	-64.872	-65.036	-65.025
-3.6247	-60.448	-63.873	-63.75	-63.594	-63.839	-63.882	-64.979	-65.052	-64.911	-64.902	-65.057	-65.054
-3.6227	-59.73	-63.679	-63.539	-63.356	-63.636	-63.688	-65.001	-65.067	-64.933	-64.929	-65.07	-65.073
-3.6207	-59.077	-63.458	-63.323	-63.11	-63.416	-63.463	-65.011	-65.071	-64.949	-64.953	-65.071	-65.081
-3.6187	-58.045	-63.224	-63.098	-62.835	-63.193	-63.226	-65.007	-65.061	-64.956	-64.968	-65.059	-65.07
-3.6167	-56.851	-62.923	-62.798	-62.479	-62.907	-62.929	-64.992	-65.043	-64.952	-64.969	-65.034	-65.048
-3.6147	-55.96	-62.62	-62.526	-62.155	-62.615	-62.63	-64.964	-65.008	-64.929	-64.951	-64.987	-65.006
-3.6127	-55.401	-62.365	-62.318	-61.908	-62.367	-62.373	-64.921	-64.952	-64.891	-64.917	-64.925	-64.947
-3.6107	-55.121	-62.205	-62.211	-61.779	-62.21	-62.207	-64.873	-64.901	-64.845	-64.879	-64.871	-64.901
-3.6087	-55.155	-62.145	-62.188	-61.747	-62.147	-62.145	-64.842	-64.857	-64.804	-64.844	-64.826	-64.861
-3.6067	-55.684	-62.2	-62.267	-61.843	-62.193	-62.199	-64.831	-64.826	-64.778	-64.828	-64.791	-64.831
-3.6047	-56.775	-62.412	-62.501	-62.12	-62.398	-62.403	-64.824	-64.807	-64.764	-64.822	-64.77	-64.814
-3.6027	-57.784	-62.702	-62.762	-62.434	-62.69	-62.689	-64.829	-64.821	-64.764	-64.83	-64.786	-64.825
-3.6007	-58.927	-63.024	-63.043	-62.772	-63.015	-63.01	-64.852	-64.871	-64.779	-64.857	-64.841	-64.87
-3.5987	-60.076	-63.363	-63.341	-63.123	-63.359	-63.35	-64.893	-64.929	-64.818	-64.902	-64.892	-64.917
-3.5967	-61.04	-63.674	-63.603	-63.437	-63.674	-63.657	-64.921	-64.985	-64.852	-64.941	-64.942	-64.97
-3.5947	-61.844	-63.924	-63.812	-63.689	-63.929	-63.899	-64.933	-65.032	-64.872	-64.963	-64.985	-65.017
-3.5927	-62.246	-64.076	-63.915	-63.816	-64.084	-64.052	-64.948	-65.065	-64.883	-64.976	-65.014	-65.05
-3.5907	-62.615	-64.174	-64.002	-63.91	-64.183	-64.152	-64.961	-65.074	-64.897	-64.984	-65.018	-65.063
-3.5887	-62.758	-64.227	-64.061	-63.962	-64.24	-64.209	-64.966	-65.056	-64.915	-64.986	-64.995	-65.046
-3.5867	-62.809	-64.244	-64.088	-63.983	-64.261	-64.23	-64.956	-65.022	-64.908	-64.972	-64.977	-65.018
-3.5847	-62.732	-64.245	-64.103	-63.988	-64.265	-64.238	-64.953	-64.992	-64.904	-64.96	-64.963	-64.989
-3.5827	-62.55	-64.222	-64.089	-63.96	-64.248	-64.23	-64.957	-64.964	-64.904	-64.951	-64.951	-64.959
-3.5807	-62.367	-64.208	-64.094	-63.955	-64.239	-64.223	-64.953	-64.939	-64.905	-64.943	-64.939	-64.93
-3.5787	-62.124	-64.176	-64.066	-63.924	-64.209	-64.197	-64.928	-64.913	-64.893	-64.927	-64.925	-64.896
-3.5767	-61.801	-64.14	-64.018	-63.874	-64.171	-64.162	-64.891	-64.899	-64.867	-64.902	-64.918	-64.877
-3.5747	-61.422	-64.071	-63.933	-63.778	-64.102	-64.095	-64.868	-64.913	-64.862	-64.892	-64.926	-64.883
-3.5727	-61.238	-63.99	-63.837	-63.677	-64.019	-64.017	-64.852	-64.936	-64.866	-64.893	-64.941	-64.898
-3.5707	-61.082	-63.929	-63.765	-63.608	-63.959	-63.959	-64.838	-64.957	-64.874	-64.902	-64.959	-64.919
-3.5687	-60.93	-63.836	-63.67	-63.514	-63.868	-63.866	-64.831	-64.978	-64.882	-64.912	-64.978	-64.94
-3.5667	-60.998	-63.775	-63.634	-63.481	-63.808	-63.803	-64.855	-65.004	-64.893	-64.928	-65.004	-64.975
-3.5647	-61.31	-63.768	-63.663	-63.524	-63.795	-63.788	-64.902	-65.034	-64.915	-64.957	-65.035	-65.013
-3.5627	-61.593	-63.796	-63.718	-63.607	-63.814	-63.801	-64.939	-65.049	-64.928	-64.979	-65.056	-65.038
-3.5607	-61.704	-63.826	-63.778	-63.684	-63.835	-63.816	-64.962	-65.061	-64.934	-64.993	-65.071	-65.057
-3.5587	-61.865	-63.831	-63.833	-63.744	-63.833	-63.808	-64.981	-65.082	-64.941	-65.006	-65.092	-65.08
-3.5567	-62.207	-63.892	-63.942	-63.866	-63.88	-63.855	-65.007	-65.117	-64.957	-65.029	-65.129	-65.123
-3.5547	-62.274	-63.948	-64.01	-63.944	-63.928	-63.903	-65.024	-65.147	-64.981	-65.054	-65.164	-65.161
-3.5527	-61.989	-63.929	-63.976	-63.907	-63.916	-63.893	-65.024	-65.163	-65.004	-65.073	-65.187	-65.184
-3.5507	-61.687	-63.876	-63.919	-63.825	-63.879	-63.861	-65.019	-65.155	-65.016	-65.081	-65.188	-65.185
-3.5487	-61.424	-63.819	-63.857	-63.739	-63.836	-63.823	-65.014	-65.129	-65.019	-65.078	-65.17	-65.165
-3.5467	-61.045	-63.768	-63.761	-63.618	-63.792	-63.786	-65.012	-65.084	-65.015	-65.067	-65.135	-65.128
-3.5447	-60.58	-63.679	-63.619	-63.444	-63.713	-63.711	-64.996	-65.029	-64.998	-65.042	-65.084	-65.072
-3.5427	-60.384	-63.583	-63.496	-63.29	-63.617	-63.622	-64.974	-64.983	-64.971	-65.01	-65.036	-65.02
-3.5407	-60.579	-63.558	-63.468	-63.252	-63.579	-63.592	-64.96	-64.95	-64.943	-64.981	-64.999	-64.982
-3.5387	-60.898	-63.59	-63.486	-63.275	-63.595	-63.614	-64.957	-64.955	-64.929	-64.967	-64.994	-64.976
-3.5367	-61.292	-63.656	-63.532	-63.335	-63.645	-63.67	-64.949	-64.977	-64.915	-64.958	-65.009	-64.996
-3.5347	-61.711	-63.748	-63.622	-63.45	-63.725	-63.754	-64.937	-65.005	-64.9	-64.95	-65.031	-65.022
-3.5327	-62.121	-63.872	-63.743	-63.601	-63.838	-63.873	-64.926	-65.03	-64.89	-64.945	-65.052	-65.048
-3.5307	-62.356	-64.015	-63.869	-63.753	-63.986	-64.017	-64.909	-65.042	-64.881	-64.938	-65.062	-65.061
-3.5287	-62.38	-64.116	-63.957	-63.847	-64.097	-64.118	-64.88	-65.037	-64.862	-64.919	-65.051	-65.055
-3.5267	-62.445	-64.19	-64.036	-63.933	-64.178	-64.19	-64.846	-65.004	-64.829	-64.883	-65.015	-65.025
-3.5247	-62.519	-64.263	-64.113	-64.024	-64.258	-64.26	-64.82	-64.957	-64.805	-64.845	-64.965	-64.977
-3.5227	-62.584	-64.32	-64.172	-64.093	-64.326	-64.319	-64.795	-64.915	-64.78	-64.803	-64.916	-64.931
-3.5207	-62.439	-64.33	-64.178	-64.1	-64.348	-64.33	-64.772	-64.878	-64.751	-64.761	-64.872	-64.889
-3.5187	-62.286	-64.288	-64.143	-64.064	-64.311	-64.289	-64.755	-64.85	-64.724	-64.727	-64.838	-64.861
-3.5167	-62.001	-64.245	-64.096	-64.021	-64.273	-64.258	-64.738	-64.832	-64.701	-64.705	-64.829	-64.85
-3.5147	-61.425	-64.15	-63.973	-63.895	-64.188	-64.18	-64.73	-64.831	-64.688	-64.699	-64.835	-64.853
-3.5127	-60.756	-63.986	-63.803	-63.702	-64.033	-64.029	-64.723	-64.847	-64.67	-64.702	-64.855	-64.871
-3.5107	-60.236	-63.812	-63.647	-63.521	-63.855	-63.849	-64.724	-64.864	-64.661	-64.717	-64.881	-64.894
-3.5087	-59.987	-63.678	-63.542	-63.402	-63.716	-63.708	-64.727	-64.882	-64.659	-64.734	-64.906	-64.915
-3.5067	-59.809	-63.599	-63.481	-63.332	-63.632	-63.62	-64.744	-64.902	-64.663	-64.753	-64.93	-64.932
-3.5047	-59.879	-63.541	-63.442	-63.287	-63.567	-63.547	-64.775	-64.935	-64.676	-64.774	-64.956	-64.956
-3.5027	-60.166	-63.536	-63.481	-63.319	-63.556	-63.527	-64.802	-64.967	-64.697	-64.793	-64.982	-64.98
-3.5007	-60.528	-63.595	-63.559	-63.403	-63.609	-63.578	-64.836	-65	-64.74	-64.822	-65.01	-65.006
-3.4987	-60.818	-63.689	-63.642	-63.494	-63.707	-63.682	-64.873	-65.039	-64.785	-64.857	-65.042	-65.036
-3.4967	-61.029	-63.78	-63.723	-63.574	-63.801	-63.782	-64.916	-65.085	-64.836	-64.899	-65.083	-65.077
-3.4947	-61.248	-63.858	-63.796	-63.646	-63.882	-63.868	-64.952	-65.132	-64.883	-64.936	-65.129	-65.125
-3.4927	-61.422	-63.932	-63.874	-63.725	-63.961	-63.952	-64.999	-65.173	-64.938	-64.985	-65.171	-65.169
-3.4907	-61.682	-64.018	-63.962	-63.823	-64.049	-64.044	-65.055	-65.215	-64.997	-65.041	-65.216	-65.216
-3.4887	-61.929	-64.105	-64.054	-63.928	-64.14	-64.138	-65.1	-65.243	-65.036	-65.082	-65.244	-65.249
-3.4867	-62.156	-64.168	-64.123	-64.01	-64.208	-64.204	-65.133	-65.256	-65.058	-65.106	-65.255	-65.268
-3.4847	-62.351	-64.217	-64.168	-64.068	-64.263	-64.261	-65.148	-65.245	-65.059	-65.113	-65.244	-65.26
-3.4827	-62.33	-64.223	-64.156	-64.061	-64.277	-64.279	-65.151	-65.217	-65.055	-65.115	-65.213	-65.232
-3.4807	-62.196	-64.185	-64.084	-63.989	-64.242	-64.247	-65.131	-65.175	-65.032	-65.098	-65.168	-65.19
-3.4787	-61.855	-64.097	-63.961	-63.856	-64.159	-64.168	-65.097	-65.128	-64.996	-65.066	-65.114	-65.139
-3.4767	-61.421	-63.972	-63.804	-63.675	-64.034	-64.047	-65.065	-65.093	-64.962	-65.038	-65.079	-65.098
-3.4747	-60.915	-63.811	-63.631	-63.47	-63.877	-63.893	-65.04	-65.065	-64.935	-65.014	-65.056	-65.068
-3.4727	-60.443	-63.643	-63.476	-63.293	-63.713	-63.729	-65.02	-65.052	-64.91	-64.991	-65.046	-65.054
-3.4707	-60.267	-63.534	-63.405	-63.21	-63.604	-63.62	-65.006	-65.046	-64.89	-64.972	-65.046	-65.05
-3.4687	-60.317	-63.494	-63.424	-63.219	-63.566	-63.579	-64.993	-65.035	-64.871	-64.954	-65.044	-65.043
-3.4667	-60.607	-63.513	-63.487	-63.294	-63.587	-63.598	-64.98	-65.018	-64.85	-64.935	-65.037	-65.032
-3.4647	-61.051	-63.584	-63.595	-63.429	-63.661	-63.668	-64.962	-64.992	-64.827	-64.911	-65.018	-65.013
-3.4627	-61.63	-63.728	-63.754	-63.628	-63.8	-63.803	-64.945	-64.967	-64.82	-64.897	-64.99	-64.988
-3.4607	-62.327	-63.911	-63.923	-63.833	-63.975	-63.974	-64.942	-64.948	-64.838	-64.904	-64.964	-64.962
-3.4587	-62.991	-64.089	-64.081	-64.028	-64.14	-64.144	-64.92	-64.935	-64.849	-64.906	-64.943	-64.944
-3.4567	-63.442	-64.255	-64.197	-64.184	-64.292	-64.304	-64.896	-64.935	-64.855	-64.905	-64.932	-64.937
-3.4547	-63.696	-64.394	-64.282	-64.291	-64.41	-64.432	-64.876	-64.939	-64.864	-64.907	-64.926	-64.933
-3.4527	-63.737	-64.482	-64.331	-64.347	-64.473	-64.511	-64.855	-64.943	-64.876	-64.911	-64.92	-64.93
-3.4507	-63.485	-64.486	-64.317	-64.321	-64.449	-64.509	-64.821	-64.937	-64.868	-64.901	-64.919	-64.924
-3.4487	-62.952	-64.393	-64.223	-64.208	-64.333	-64.418	-64.764	-64.92	-64.833	-64.866	-64.914	-64.919
-3.4467	-62.284	-64.23	-64.066	-64.031	-64.159	-64.259	-64.743	-64.898	-64.805	-64.834	-64.905	-64.909
-3.4447	-61.632	-64.024	-63.893	-63.827	-63.945	-64.058	-64.733	-64.877	-64.788	-64.813	-64.893	-64.894
-3.4427	-61.043	-63.811	-63.74	-63.64	-63.727	-63.851	-64.721	-64.853	-64.763	-64.785	-64.878	-64.873
-3.4407	-60.721	-63.637	-63.612	-63.493	-63.564	-63.684	-64.698	-64.822	-64.725	-64.747	-64.853	-64.84
-3.4387	-60.841	-63.561	-63.566	-63.452	-63.507	-63.614	-64.686	-64.795	-64.691	-64.712	-64.82	-64.799
-3.4367	-61.256	-63.627	-63.649	-63.55	-63.588	-63.674	-64.7	-64.786	-64.68	-64.702	-64.798	-64.766
-3.4347	-61.573	-63.778	-63.786	-63.694	-63.755	-63.815	-64.712	-64.79	-64.684	-64.709	-64.789	-64.748
-3.4327	-61.908	-63.949	-63.915	-63.836	-63.938	-63.973	-64.733	-64.808	-64.703	-64.732	-64.801	-64.754
-3.4307	-62.167	-64.104	-64.015	-63.953	-64.108	-64.119	-64.775	-64.849	-64.747	-64.782	-64.838	-64.79
-3.4287	-62.238	-64.196	-64.076	-64.015	-64.209	-64.201	-64.851	-64.922	-64.822	-64.86	-64.909	-64.865
-3.4267	-62.071	-64.215	-64.088	-64.007	-64.233	-64.211	-64.951	-65.023	-64.916	-64.959	-65.013	-64.98
-3.4247	-61.78	-64.146	-64.013	-63.915	-64.174	-64.145	-65.035	-65.118	-65.001	-65.05	-65.118	-65.095
-3.4227	-61.77	-64.045	-63.921	-63.818	-64.081	-64.055	-65.097	-65.189	-65.062	-65.113	-65.2	-65.188
-3.4207	-61.881	-63.968	-63.873	-63.764	-64.013	-63.99	-65.131	-65.229	-65.09	-65.144	-65.25	-65.245
-3.4187	-62.184	-63.936	-63.876	-63.768	-63.988	-63.969	-65.137	-65.234	-65.089	-65.144	-65.26	-65.265
-3.4167	-62.592	-63.996	-63.942	-63.846	-64.051	-64.04	-65.109	-65.196	-65.058	-65.115	-65.228	-65.241
-3.4147	-62.9	-64.076	-64.006	-63.927	-64.142	-64.139	-65.05	-65.125	-65.005	-65.058	-65.16	-65.179
-3.4127	-63.021	-64.133	-64.046	-63.961	-64.204	-64.209	-65.001	-65.048	-64.949	-65.001	-65.078	-65.105
-3.4107	-62.988	-64.134	-64.066	-63.965	-64.211	-64.219	-64.967	-64.991	-64.909	-64.964	-65.007	-65.043
-3.4087	-62.865	-64.114	-64.071	-63.96	-64.196	-64.206	-64.952	-64.961	-64.895	-64.947	-64.961	-65.006
-3.4067	-62.344	-64.056	-64.011	-63.879	-64.139	-64.153	-64.959	-64.961	-64.905	-64.952	-64.953	-64.999
-3.4047	-61.453	-63.876	-63.828	-63.659	-63.967	-63.983	-64.987	-64.997	-64.931	-64.978	-64.979	-65.024
-3.4027	-60.712	-63.651	-63.616	-63.41	-63.737	-63.755	-65.027	-65.051	-64.969	-65.017	-65.023	-65.067
-3.4007	-60.303	-63.487	-63.488	-63.267	-63.565	-63.583	-65.06	-65.107	-65.007	-65.056	-65.074	-65.115
-3.3987	-59.997	-63.432	-63.438	-63.208	-63.497	-63.515	-65.088	-65.157	-65.038	-65.083	-65.126	-65.162
-3.3967	-59.683	-63.408	-63.396	-63.158	-63.463	-63.478	-65.101	-65.192	-65.054	-65.098	-65.164	-65.196
-3.3947	-59.694	-63.399	-63.384	-63.144	-63.445	-63.453	-65.099	-65.21	-65.049	-65.097	-65.181	-65.212
-3.3927	-60.175	-63.49	-63.495	-63.272	-63.521	-63.522	-65.084	-65.206	-65.027	-65.081	-65.178	-65.21
-3.3907	-60.622	-63.646	-63.65	-63.451	-63.669	-63.663	-65.052	-65.159	-64.987	-65.045	-65.141	-65.172
-3.3887	-60.895	-63.775	-63.749	-63.573	-63.794	-63.782	-64.988	-65.058	-64.922	-64.979	-65.058	-65.088
-3.3867	-61.019	-63.815	-63.764	-63.601	-63.832	-63.81	-64.903	-64.93	-64.841	-64.899	-64.946	-64.977
-3.3847	-61.178	-63.803	-63.746	-63.593	-63.816	-63.792	-64.818	-64.788	-64.755	-64.811	-64.816	-64.85
-3.3827	-61.468	-63.814	-63.772	-63.633	-63.825	-63.8	-64.729	-64.639	-64.677	-64.721	-64.679	-64.716
-3.3807	-61.687	-63.824	-63.789	-63.661	-63.835	-63.81	-64.636	-64.488	-64.589	-64.625	-64.54	-64.58
-3.3787	-61.976	-63.838	-63.819	-63.695	-63.85	-63.825	-64.555	-64.392	-64.515	-64.545	-64.438	-64.483
-3.3767	-62.276	-63.875	-63.877	-63.752	-63.889	-63.864	-64.53	-64.39	-64.481	-64.513	-64.421	-64.468
-3.3747	-62.57	-63.96	-63.965	-63.849	-63.979	-63.961	-64.543	-64.439	-64.482	-64.517	-64.458	-64.503
-3.3727	-62.832	-64.076	-64.069	-63.963	-64.101	-64.09	-64.583	-64.529	-64.51	-64.556	-64.544	-64.582
-3.3707	-62.965	-64.176	-64.14	-64.04	-64.205	-64.198	-64.645	-64.646	-64.551	-64.612	-64.655	-64.687
-3.3687	-63.112	-64.275	-64.213	-64.123	-64.301	-64.293	-64.724	-64.767	-64.624	-64.69	-64.76	-64.789
-3.3667	-63.216	-64.368	-64.29	-64.217	-64.392	-64.383	-64.804	-64.873	-64.706	-64.77	-64.854	-64.877
-3.3647	-63.35	-64.452	-64.363	-64.313	-64.474	-64.464	-64.867	-64.942	-64.776	-64.839	-64.913	-64.934
-3.3627	-63.692	-64.545	-64.473	-64.44	-64.561	-64.546	-64.922	-64.989	-64.834	-64.893	-64.948	-64.97
-3.3607	-64.074	-64.663	-64.611	-64.596	-64.669	-64.648	-64.957	-65.011	-64.871	-64.922	-64.951	-64.979
-3.3587	-64.408	-64.775	-64.745	-64.75	-64.768	-64.743	-64.959	-65.007	-64.886	-64.929	-64.928	-64.964
-3.3567	-64.626	-64.866	-64.845	-64.864	-64.852	-64.833	-64.951	-65.006	-64.891	-64.924	-64.919	-64.964
-3.3547	-64.704	-64.927	-64.897	-64.92	-64.906	-64.893	-64.942	-65	-64.89	-64.913	-64.912	-64.968
-3.3527	-64.727	-64.956	-64.917	-64.941	-64.929	-64.923	-64.922	-64.979	-64.88	-64.891	-64.889	-64.954
-3.3507	-64.554	-64.939	-64.888	-64.909	-64.909	-64.91	-64.889	-64.95	-64.864	-64.861	-64.858	-64.932
-3.3487	-64.139	-64.857	-64.791	-64.799	-64.83	-64.837	-64.862	-64.924	-64.853	-64.843	-64.838	-64.914
-3.3467	-63.498	-64.725	-64.629	-64.614	-64.715	-64.727	-64.871	-64.919	-64.864	-64.846	-64.846	-64.916
-3.3447	-62.803	-64.54	-64.427	-64.383	-64.546	-64.559	-64.894	-64.927	-64.88	-64.864	-64.868	-64.927
-3.3427	-62.224	-64.35	-64.245	-64.175	-64.371	-64.384	-64.925	-64.95	-64.902	-64.895	-64.899	-64.946
-3.3407	-61.519	-64.165	-64.057	-63.953	-64.19	-64.21	-64.967	-64.998	-64.933	-64.936	-64.954	-64.994
-3.3387	-60.829	-63.969	-63.848	-63.709	-63.996	-64.022	-65.016	-65.052	-64.971	-64.984	-65.011	-65.048
-3.3367	-60.521	-63.81	-63.692	-63.533	-63.833	-63.866	-65.048	-65.091	-64.999	-65.02	-65.046	-65.087
-3.3347	-60.618	-63.739	-63.647	-63.484	-63.747	-63.786	-65.048	-65.094	-65.007	-65.034	-65.044	-65.091
-3.3327	-60.769	-63.748	-63.661	-63.499	-63.739	-63.787	-65.028	-65.075	-64.993	-65.022	-65.023	-65.075
-3.3307	-60.889	-63.751	-63.662	-63.503	-63.716	-63.786	-64.986	-65.013	-64.95	-64.982	-64.972	-65.029
-3.3287	-61.138	-63.733	-63.67	-63.521	-63.686	-63.769	-64.908	-64.895	-64.882	-64.913	-64.873	-64.932
-3.3267	-61.481	-63.749	-63.717	-63.586	-63.69	-63.785	-64.804	-64.758	-64.798	-64.824	-64.764	-64.817
-3.3247	-61.648	-63.767	-63.748	-63.631	-63.698	-63.806	-64.721	-64.638	-64.718	-64.74	-64.68	-64.718
-3.3227	-61.66	-63.749	-63.731	-63.623	-63.671	-63.792	-64.667	-64.569	-64.663	-64.684	-64.64	-64.668
-3.3207	-61.807	-63.727	-63.735	-63.642	-63.641	-63.77	-64.643	-64.529	-64.64	-64.665	-64.623	-64.645
-3.3187	-62.132	-63.788	-63.806	-63.734	-63.718	-63.828	-64.651	-64.56	-64.666	-64.682	-64.654	-64.668
-3.3167	-62.531	-63.971	-63.945	-63.903	-63.912	-64.001	-64.719	-64.678	-64.729	-64.743	-64.758	-64.765
-3.3147	-62.693	-64.149	-64.055	-64.032	-64.108	-64.177	-64.831	-64.831	-64.817	-64.836	-64.894	-64.899
-3.3127	-62.709	-64.286	-64.149	-64.123	-64.264	-64.314	-64.94	-64.987	-64.901	-64.931	-65.03	-65.035
-3.3107	-62.549	-64.384	-64.21	-64.172	-64.383	-64.413	-65.031	-65.106	-64.97	-65.008	-65.138	-65.142
-3.3087	-62.06	-64.398	-64.161	-64.104	-64.417	-64.432	-65.079	-65.125	-64.998	-65.039	-65.171	-65.174
-3.3067	-61.278	-64.29	-64.01	-63.92	-64.32	-64.333	-65.068	-65.048	-64.965	-65.014	-65.121	-65.122
-3.3047	-60.398	-64.046	-63.776	-63.641	-64.085	-64.1	-64.991	-64.894	-64.889	-64.943	-65.002	-65.001
-3.3027	-59.901	-63.819	-63.593	-63.431	-63.858	-63.874	-64.871	-64.699	-64.792	-64.84	-64.842	-64.839
-3.3007	-59.671	-63.665	-63.473	-63.305	-63.701	-63.716	-64.742	-64.491	-64.697	-64.731	-64.669	-64.664
-3.2987	-59.636	-63.563	-63.397	-63.232	-63.597	-63.611	-64.615	-64.297	-64.601	-64.623	-64.5	-64.493
-3.2967	-59.932	-63.529	-63.412	-63.246	-63.563	-63.575	-64.533	-64.256	-64.545	-64.56	-64.434	-64.428
-3.2947	-60.468	-63.572	-63.496	-63.34	-63.604	-63.613	-64.531	-64.329	-64.56	-64.575	-64.477	-64.473
-3.2927	-61.059	-63.697	-63.641	-63.501	-63.728	-63.734	-64.601	-64.465	-64.629	-64.645	-64.583	-64.581
-3.2907	-61.253	-63.806	-63.743	-63.599	-63.841	-63.846	-64.708	-64.648	-64.725	-64.75	-64.733	-64.734
-3.2887	-61.187	-63.848	-63.762	-63.605	-63.89	-63.895	-64.828	-64.846	-64.828	-64.863	-64.9	-64.902
-3.2867	-61.125	-63.872	-63.773	-63.605	-63.918	-63.925	-64.944	-65.021	-64.932	-64.973	-65.056	-65.061
-3.2847	-60.906	-63.905	-63.777	-63.607	-63.947	-63.957	-65.022	-65.086	-65	-65.042	-65.134	-65.14
-3.2827	-60.545	-63.911	-63.755	-63.582	-63.945	-63.963	-65.039	-65.071	-65.013	-65.049	-65.128	-65.139
-3.2807	-60.169	-63.861	-63.686	-63.503	-63.886	-63.912	-64.998	-64.971	-64.976	-64.999	-65.051	-65.066
-3.2787	-60.093	-63.805	-63.633	-63.453	-63.816	-63.853	-64.913	-64.797	-64.897	-64.899	-64.906	-64.926
-3.2767	-60.243	-63.775	-63.626	-63.458	-63.766	-63.816	-64.794	-64.585	-64.79	-64.772	-64.723	-64.746
-3.2747	-60.386	-63.747	-63.619	-63.462	-63.722	-63.784	-64.667	-64.405	-64.682	-64.647	-64.55	-64.577
-3.2727	-60.69	-63.718	-63.631	-63.481	-63.682	-63.754	-64.567	-64.291	-64.599	-64.547	-64.432	-64.461
-3.2707	-61.126	-63.735	-63.685	-63.545	-63.7	-63.771	-64.498	-64.22	-64.544	-64.477	-64.367	-64.389
-3.2687	-61.77	-63.821	-63.81	-63.692	-63.781	-63.856	-64.464	-64.241	-64.52	-64.444	-64.369	-64.386
-3.2667	-62.44	-63.96	-63.977	-63.879	-63.919	-63.995	-64.487	-64.333	-64.544	-64.469	-64.443	-64.458
-3.2647	-63.078	-64.146	-64.181	-64.098	-64.108	-64.182	-64.545	-64.458	-64.597	-64.524	-64.552	-64.563
-3.2627	-63.668	-64.346	-64.379	-64.309	-64.31	-64.381	-64.628	-64.575	-64.657	-64.589	-64.666	-64.674
-3.2607	-64.136	-64.535	-64.545	-64.487	-64.498	-64.566	-64.709	-64.661	-64.713	-64.651	-64.758	-64.763
-3.2587	-64.51	-64.672	-64.67	-64.621	-64.631	-64.699	-64.778	-64.73	-64.755	-64.71	-64.826	-64.832
-3.2567	-64.682	-64.773	-64.744	-64.697	-64.731	-64.792	-64.832	-64.755	-64.78	-64.756	-64.862	-64.869
-3.2547	-64.728	-64.83	-64.777	-64.732	-64.787	-64.842	-64.85	-64.761	-64.774	-64.77	-64.866	-64.87
-3.2527	-64.735	-64.854	-64.779	-64.738	-64.813	-64.86	-64.842	-64.735	-64.748	-64.76	-64.844	-64.846
-3.2507	-64.775	-64.878	-64.799	-64.768	-64.839	-64.878	-64.802	-64.677	-64.7	-64.724	-64.79	-64.791
-3.2487	-64.821	-64.911	-64.819	-64.802	-64.873	-64.907	-64.74	-64.604	-64.636	-64.671	-64.72	-64.719
-3.2467	-64.884	-64.975	-64.857	-64.857	-64.936	-64.969	-64.668	-64.524	-64.58	-64.609	-64.643	-64.639
-3.2447	-64.953	-65.031	-64.899	-64.915	-64.991	-65.026	-64.601	-64.45	-64.54	-64.553	-64.57	-64.567
-3.2427	-65.014	-65.076	-64.932	-64.962	-65.039	-65.071	-64.547	-64.395	-64.511	-64.51	-64.519	-64.518
-3.2407	-65.005	-65.103	-64.947	-64.985	-65.066	-65.099	-64.527	-64.424	-64.518	-64.509	-64.531	-64.531
-3.2387	-64.843	-65.088	-64.911	-64.948	-65.053	-65.086	-64.542	-64.509	-64.562	-64.55	-64.594	-64.595
-3.2367	-64.546	-65.018	-64.839	-64.862	-64.987	-65.021	-64.589	-64.625	-64.63	-64.622	-64.687	-64.684
-3.2347	-64.156	-64.874	-64.709	-64.714	-64.845	-64.883	-64.66	-64.752	-64.705	-64.707	-64.792	-64.785
-3.2327	-63.74	-64.699	-64.559	-64.547	-64.679	-64.712	-64.724	-64.866	-64.768	-64.785	-64.887	-64.875
-3.2307	-63.275	-64.527	-64.394	-64.368	-64.514	-64.548	-64.789	-64.96	-64.839	-64.865	-64.966	-64.947
-3.2287	-62.771	-64.333	-64.203	-64.165	-64.329	-64.364	-64.852	-65.001	-64.893	-64.926	-65.008	-64.983
-3.2267	-62.372	-64.144	-64.034	-63.986	-64.145	-64.178	-64.911	-65.011	-64.932	-64.97	-65.025	-64.998
-3.2247	-62.189	-63.996	-63.913	-63.866	-63.999	-64.025	-64.955	-65.009	-64.956	-64.992	-65.032	-65.008
-3.2227	-62.147	-63.94	-63.877	-63.825	-63.951	-63.959	-64.973	-65	-64.967	-65	-65.031	-65.009
-3.2207	-62.069	-63.935	-63.847	-63.792	-63.947	-63.948	-64.985	-64.999	-64.974	-65.001	-65.033	-65.013
-3.2187	-61.962	-63.924	-63.818	-63.751	-63.938	-63.931	-64.982	-64.985	-64.961	-64.983	-65.018	-65.004
-3.2167	-62.027	-63.94	-63.818	-63.755	-63.953	-63.938	-64.952	-64.963	-64.93	-64.947	-64.987	-64.98
-3.2147	-62.238	-63.999	-63.85	-63.798	-64.011	-63.993	-64.899	-64.941	-64.892	-64.902	-64.952	-64.95
-3.2127	-62.371	-64.079	-63.889	-63.849	-64.093	-64.075	-64.849	-64.913	-64.859	-64.867	-64.91	-64.911
-3.2107	-62.284	-64.12	-63.874	-63.856	-64.134	-64.122	-64.823	-64.898	-64.838	-64.844	-64.885	-64.893
-3.2087	-62.185	-64.128	-63.856	-63.857	-64.143	-64.134	-64.806	-64.894	-64.823	-64.826	-64.874	-64.892
-3.2067	-62.267	-64.165	-63.887	-63.907	-64.176	-64.169	-64.801	-64.91	-64.823	-64.828	-64.893	-64.911
-3.2047	-62.242	-64.214	-63.948	-63.961	-64.225	-64.22	-64.8	-64.941	-64.842	-64.843	-64.932	-64.95
-3.2027	-62.096	-64.248	-63.99	-63.989	-64.259	-64.255	-64.818	-64.977	-64.867	-64.867	-64.978	-64.995
-3.2007	-61.962	-64.259	-64.006	-63.996	-64.276	-64.275	-64.835	-65.024	-64.889	-64.888	-65.029	-65.046
-3.1987	-62.052	-64.269	-64.051	-64.023	-64.289	-64.287	-64.848	-65.058	-64.906	-64.905	-65.061	-65.079
-3.1967	-62.289	-64.299	-64.118	-64.08	-64.319	-64.317	-64.866	-65.086	-64.931	-64.939	-65.085	-65.103
-3.1947	-62.464	-64.311	-64.155	-64.113	-64.326	-64.331	-64.874	-65.103	-64.948	-64.961	-65.095	-65.117
-3.1927	-62.722	-64.318	-64.188	-64.157	-64.322	-64.338	-64.874	-65.108	-64.954	-64.974	-65.092	-65.118
-3.1907	-62.989	-64.329	-64.23	-64.209	-64.319	-64.342	-64.842	-65.099	-64.941	-64.968	-65.074	-65.106
-3.1887	-63.239	-64.347	-64.282	-64.261	-64.315	-64.344	-64.791	-65.067	-64.909	-64.94	-65.041	-65.075
-3.1867	-63.428	-64.386	-64.341	-64.32	-64.333	-64.373	-64.718	-65.026	-64.866	-64.898	-65.005	-65.036
-3.1847	-63.547	-64.431	-64.401	-64.376	-64.363	-64.41	-64.633	-64.97	-64.808	-64.835	-64.951	-64.983
-3.1827	-63.632	-64.485	-64.466	-64.429	-64.42	-64.463	-64.565	-64.907	-64.752	-64.774	-64.891	-64.923
-3.1807	-63.583	-64.526	-64.497	-64.445	-64.479	-64.51	-64.54	-64.853	-64.709	-64.727	-64.841	-64.872
-3.1787	-63.483	-64.537	-64.485	-64.425	-64.511	-64.535	-64.564	-64.822	-64.699	-64.713	-64.811	-64.843
-3.1767	-63.377	-64.538	-64.464	-64.404	-64.537	-64.556	-64.614	-64.819	-64.719	-64.729	-64.808	-64.84
-3.1747	-63.387	-64.534	-64.441	-64.382	-64.556	-64.567	-64.696	-64.843	-64.76	-64.769	-64.833	-64.864
-3.1727	-63.469	-64.543	-64.438	-64.384	-64.576	-64.587	-64.795	-64.895	-64.817	-64.829	-64.892	-64.918
-3.1707	-63.572	-64.571	-64.45	-64.411	-64.602	-64.619	-64.891	-64.962	-64.879	-64.895	-64.962	-64.981
-3.1687	-63.836	-64.638	-64.496	-64.482	-64.652	-64.678	-64.959	-65.023	-64.934	-64.952	-65.027	-65.04
-3.1667	-64.184	-64.758	-64.602	-64.612	-64.753	-64.786	-65.001	-65.071	-64.969	-64.993	-65.081	-65.086
-3.1647	-64.549	-64.897	-64.73	-64.759	-64.874	-64.913	-65.035	-65.106	-64.985	-65.02	-65.12	-65.119
-3.1627	-64.798	-65.026	-64.849	-64.9	-64.979	-65.029	-65.053	-65.123	-64.987	-65.03	-65.14	-65.133
-3.1607	-64.866	-65.124	-64.925	-64.993	-65.068	-65.119	-65.049	-65.114	-64.97	-65.019	-65.126	-65.11
-3.1587	-64.837	-65.168	-64.951	-65.025	-65.11	-65.16	-65.03	-65.098	-64.943	-64.996	-65.105	-65.081
-3.1567	-64.701	-65.15	-64.942	-65.009	-65.088	-65.144	-65.011	-65.085	-64.918	-64.974	-65.088	-65.058
-3.1547	-64.512	-65.079	-64.905	-64.953	-65.016	-65.078	-64.993	-65.066	-64.894	-64.952	-65.062	-65.026
-3.1527	-64.296	-64.97	-64.835	-64.863	-64.91	-64.978	-64.964	-65.031	-64.871	-64.928	-65.017	-64.977
-3.1507	-64.053	-64.835	-64.737	-64.743	-64.797	-64.858	-64.931	-64.991	-64.851	-64.905	-64.967	-64.927
-3.1487	-63.885	-64.682	-64.626	-64.613	-64.658	-64.722	-64.913	-64.969	-64.836	-64.893	-64.94	-64.912
-3.1467	-63.769	-64.533	-64.524	-64.496	-64.517	-64.586	-64.909	-64.955	-64.829	-64.892	-64.922	-64.906
-3.1447	-63.651	-64.391	-64.405	-64.376	-64.4	-64.463	-64.907	-64.94	-64.82	-64.89	-64.904	-64.899
-3.1427	-63.529	-64.264	-64.269	-64.251	-64.292	-64.35	-64.907	-64.942	-64.812	-64.892	-64.909	-64.913
-3.1407	-63.422	-64.167	-64.156	-64.152	-64.206	-64.258	-64.923	-64.979	-64.816	-64.908	-64.954	-64.964
-3.1387	-63.362	-64.122	-64.087	-64.097	-64.149	-64.201	-64.946	-65.031	-64.823	-64.931	-65.014	-65.028
-3.1367	-63.414	-64.122	-64.078	-64.103	-64.136	-64.187	-64.96	-65.08	-64.839	-64.955	-65.069	-65.081
-3.1347	-63.377	-64.169	-64.1	-64.143	-64.181	-64.223	-64.964	-65.118	-64.856	-64.976	-65.118	-65.126
-3.1327	-63.297	-64.243	-64.155	-64.194	-64.24	-64.28	-64.954	-65.116	-64.865	-64.983	-65.138	-65.143
-3.1307	-63.242	-64.333	-64.245	-64.272	-64.316	-64.353	-64.919	-65.064	-64.851	-64.96	-65.109	-65.111
-3.1287	-63.18	-64.423	-64.332	-64.347	-64.397	-64.432	-64.864	-64.977	-64.827	-64.914	-65.041	-65.042
-3.1267	-63.084	-64.496	-64.398	-64.402	-64.476	-64.508	-64.81	-64.876	-64.805	-64.865	-64.959	-64.958
-3.1247	-62.953	-64.565	-64.437	-64.43	-64.554	-64.58	-64.769	-64.769	-64.776	-64.813	-64.871	-64.868
-3.1227	-63.145	-64.642	-64.499	-64.488	-64.634	-64.655	-64.74	-64.676	-64.747	-64.764	-64.788	-64.784
-3.1207	-63.364	-64.733	-64.569	-64.577	-64.735	-64.753	-64.735	-64.656	-64.738	-64.739	-64.753	-64.751
-3.1187	-63.373	-64.78	-64.579	-64.604	-64.798	-64.812	-64.772	-64.702	-64.768	-64.761	-64.776	-64.78
-3.1167	-63.358	-64.782	-64.552	-64.589	-64.814	-64.825	-64.831	-64.769	-64.812	-64.809	-64.824	-64.834
-3.1147	-63.359	-64.756	-64.517	-64.564	-64.798	-64.803	-64.891	-64.842	-64.855	-64.858	-64.875	-64.891
-3.1127	-63.299	-64.693	-64.463	-64.518	-64.743	-64.746	-64.937	-64.906	-64.893	-64.901	-64.913	-64.936
-3.1107	-63.027	-64.596	-64.384	-64.433	-64.651	-64.653	-64.97	-64.957	-64.923	-64.936	-64.943	-64.972
-3.1087	-62.92	-64.496	-64.32	-64.348	-64.548	-64.547	-64.984	-64.941	-64.937	-64.954	-64.933	-64.965
-3.1067	-63.215	-64.472	-64.351	-64.372	-64.516	-64.511	-64.97	-64.882	-64.926	-64.945	-64.891	-64.919
-3.1047	-63.569	-64.51	-64.43	-64.455	-64.548	-64.538	-64.941	-64.817	-64.901	-64.92	-64.836	-64.86
-3.1027	-63.919	-64.571	-64.519	-64.55	-64.606	-64.595	-64.906	-64.747	-64.871	-64.889	-64.777	-64.798
-3.1007	-64.281	-64.658	-64.628	-64.66	-64.688	-64.677	-64.865	-64.683	-64.836	-64.855	-64.732	-64.751
-3.0987	-64.647	-64.753	-64.732	-64.771	-64.78	-64.768	-64.81	-64.615	-64.796	-64.815	-64.681	-64.698
-3.0967	-64.883	-64.831	-64.807	-64.86	-64.861	-64.848	-64.755	-64.596	-64.759	-64.777	-64.652	-64.669
-3.0947	-64.915	-64.879	-64.837	-64.894	-64.907	-64.893	-64.725	-64.623	-64.742	-64.76	-64.658	-64.677
-3.0927	-64.832	-64.901	-64.851	-64.899	-64.927	-64.914	-64.709	-64.66	-64.738	-64.757	-64.677	-64.698
-3.0907	-64.701	-64.91	-64.845	-64.881	-64.933	-64.922	-64.695	-64.712	-64.739	-64.759	-64.718	-64.736
-3.0887	-64.562	-64.897	-64.821	-64.847	-64.912	-64.908	-64.695	-64.769	-64.751	-64.772	-64.765	-64.779
-3.0867	-64.403	-64.859	-64.783	-64.795	-64.87	-64.875	-64.728	-64.837	-64.775	-64.801	-64.825	-64.833
-3.0847	-64.175	-64.779	-64.705	-64.691	-64.79	-64.804	-64.764	-64.878	-64.79	-64.821	-64.871	-64.873
-3.0827	-63.886	-64.65	-64.588	-64.543	-64.667	-64.692	-64.762	-64.875	-64.778	-64.809	-64.879	-64.875
-3.0807	-63.701	-64.487	-64.438	-64.368	-64.504	-64.544	-64.734	-64.842	-64.743	-64.77	-64.863	-64.855
-3.0787	-63.55	-64.333	-64.303	-64.212	-64.342	-64.396	-64.71	-64.794	-64.711	-64.729	-64.821	-64.816
-3.0767	-63.204	-64.174	-64.152	-64.036	-64.187	-64.247	-64.69	-64.744	-64.683	-64.69	-64.773	-64.773
-3.0747	-62.767	-64.005	-63.972	-63.834	-64.01	-64.077	-64.65	-64.697	-64.651	-64.644	-64.726	-64.731
-3.0727	-62.345	-63.867	-63.824	-63.68	-63.856	-63.931	-64.621	-64.669	-64.643	-64.621	-64.698	-64.711
-3.0707	-62.016	-63.77	-63.716	-63.577	-63.738	-63.823	-64.641	-64.676	-64.666	-64.637	-64.703	-64.724
-3.0687	-61.726	-63.729	-63.672	-63.54	-63.683	-63.769	-64.695	-64.731	-64.718	-64.688	-64.744	-64.773
-3.0667	-61.513	-63.715	-63.656	-63.53	-63.66	-63.743	-64.748	-64.797	-64.763	-64.734	-64.801	-64.835
-3.0647	-61.668	-63.737	-63.678	-63.571	-63.67	-63.747	-64.793	-64.861	-64.801	-64.779	-64.86	-64.896
-3.0627	-61.933	-63.82	-63.77	-63.684	-63.754	-63.819	-64.858	-64.926	-64.845	-64.833	-64.921	-64.958
-3.0607	-62.301	-63.932	-63.885	-63.816	-63.869	-63.922	-64.919	-64.986	-64.875	-64.879	-64.975	-65.012
-3.0587	-62.558	-64.048	-63.999	-63.938	-63.993	-64.032	-64.952	-65.027	-64.884	-64.899	-65.013	-65.05
-3.0567	-62.478	-64.096	-64.013	-63.952	-64.052	-64.08	-64.958	-65.039	-64.873	-64.894	-65.029	-65.063
-3.0547	-62.292	-64.074	-63.959	-63.887	-64.04	-64.066	-64.967	-65.052	-64.872	-64.905	-65.049	-65.077
-3.0527	-61.944	-64.027	-63.902	-63.805	-64	-64.03	-64.968	-65.072	-64.872	-64.916	-65.07	-65.09
-3.0507	-61.61	-63.951	-63.816	-63.694	-63.927	-63.964	-64.939	-65.075	-64.858	-64.909	-65.075	-65.086
-3.0487	-61.278	-63.869	-63.72	-63.571	-63.848	-63.891	-64.898	-65.063	-64.849	-64.897	-65.064	-65.065
-3.0467	-61.072	-63.783	-63.623	-63.443	-63.77	-63.814	-64.856	-65.045	-64.842	-64.886	-65.047	-65.04
-3.0447	-61.323	-63.777	-63.637	-63.442	-63.77	-63.812	-64.823	-65.022	-64.839	-64.881	-65.018	-65.007
-3.0427	-61.562	-63.849	-63.717	-63.521	-63.848	-63.882	-64.777	-64.981	-64.824	-64.858	-64.962	-64.955
-3.0407	-61.789	-63.926	-63.785	-63.597	-63.925	-63.953	-64.744	-64.928	-64.8	-64.827	-64.896	-64.9
-3.0387	-62.086	-64.008	-63.864	-63.688	-64.004	-64.029	-64.742	-64.893	-64.785	-64.81	-64.849	-64.868
-3.0367	-62.306	-64.091	-63.958	-63.798	-64.083	-64.104	-64.747	-64.87	-64.763	-64.79	-64.815	-64.848
-3.0347	-62.428	-64.17	-64.049	-63.91	-64.153	-64.176	-64.754	-64.847	-64.743	-64.779	-64.783	-64.831
-3.0327	-62.456	-64.212	-64.107	-63.988	-64.182	-64.214	-64.752	-64.835	-64.729	-64.771	-64.773	-64.827
-3.0307	-62.46	-64.215	-64.132	-64.022	-64.173	-64.217	-64.758	-64.845	-64.725	-64.769	-64.794	-64.847
-3.0287	-62.41	-64.201	-64.135	-64.029	-64.157	-64.209	-64.768	-64.871	-64.74	-64.782	-64.838	-64.882
-3.0267	-62.212	-64.163	-64.106	-64.004	-64.125	-64.176	-64.769	-64.889	-64.761	-64.797	-64.876	-64.909
-3.0247	-61.857	-64.077	-64.011	-63.907	-64.046	-64.095	-64.771	-64.903	-64.792	-64.819	-64.907	-64.928
-3.0227	-61.553	-63.971	-63.91	-63.801	-63.945	-63.991	-64.777	-64.924	-64.818	-64.834	-64.94	-64.949
-3.0207	-60.961	-63.848	-63.761	-63.638	-63.837	-63.87	-64.816	-64.949	-64.847	-64.853	-64.971	-64.971
-3.0187	-60.515	-63.716	-63.601	-63.473	-63.719	-63.735	-64.847	-64.963	-64.864	-64.856	-64.986	-64.977
-3.0167	-59.999	-63.598	-63.467	-63.335	-63.608	-63.608	-64.846	-64.952	-64.851	-64.827	-64.974	-64.959
-3.0147	-59.417	-63.456	-63.309	-63.154	-63.474	-63.47	-64.834	-64.932	-64.825	-64.785	-64.95	-64.929
-3.0127	-59.216	-63.355	-63.226	-63.051	-63.377	-63.371	-64.825	-64.919	-64.802	-64.752	-64.936	-64.913
-3.0107	-58.977	-63.292	-63.166	-62.972	-63.321	-63.312	-64.824	-64.911	-64.79	-64.73	-64.929	-64.899
-3.0087	-58.891	-63.238	-63.125	-62.914	-63.27	-63.264	-64.798	-64.902	-64.776	-64.706	-64.921	-64.885
-3.0067	-58.526	-63.184	-63.09	-62.845	-63.219	-63.22	-64.791	-64.902	-64.781	-64.724	-64.923	-64.89
-3.0047	-58.337	-63.108	-63.029	-62.752	-63.149	-63.157	-64.82	-64.931	-64.805	-64.754	-64.952	-64.92
-3.0027	-58.161	-63.058	-63.005	-62.702	-63.095	-63.109	-64.826	-64.957	-64.797	-64.735	-64.976	-64.947
-3.0007	-57.535	-62.944	-62.892	-62.553	-62.979	-62.998	-64.792	-64.923	-64.746	-64.656	-64.953	-64.927
-2.9987	-56.826	-62.733	-62.687	-62.306	-62.766	-62.79	-64.682	-64.817	-64.638	-64.507	-64.86	-64.848
-2.9967	-56.326	-62.509	-62.498	-62.082	-62.536	-62.565	-64.47	-64.657	-64.49	-64.312	-64.715	-64.717
-2.9947	-56.24	-62.314	-62.347	-61.911	-62.332	-62.364	-64.206	-64.45	-64.306	-64.064	-64.523	-64.536
-2.9927	-56.256	-62.19	-62.269	-61.82	-62.198	-62.232	-63.932	-64.222	-64.137	-63.854	-64.31	-64.333
-2.9907	-56.626	-62.154	-62.267	-61.827	-62.161	-62.193	-63.706	-64.008	-64.037	-63.746	-64.118	-64.151
-2.9887	-57.257	-62.233	-62.361	-61.945	-62.249	-62.279	-63.54	-63.885	-63.999	-63.727	-63.989	-64.033
-2.9867	-58.009	-62.4	-62.544	-62.16	-62.424	-62.455	-63.485	-63.849	-64.04	-63.804	-63.955	-63.997
-2.9847	-58.61	-62.588	-62.745	-62.39	-62.625	-62.659	-63.538	-63.857	-64.118	-63.922	-63.968	-64.006
-2.9827	-59.021	-62.781	-62.938	-62.615	-62.824	-62.867	-63.601	-63.894	-64.185	-64.02	-64.008	-64.042
-2.9807	-59.152	-62.938	-63.084	-62.784	-62.99	-63.042	-63.641	-63.919	-64.21	-64.069	-64.036	-64.064
-2.9787	-59.015	-63	-63.127	-62.834	-63.055	-63.119	-63.662	-63.925	-64.198	-64.062	-64.041	-64.063
-2.9767	-59.086	-63.022	-63.148	-62.866	-63.068	-63.142	-63.632	-63.869	-64.131	-63.967	-64.008	-64.017
-2.9747	-59.319	-63.099	-63.211	-62.946	-63.131	-63.209	-63.532	-63.771	-64.002	-63.791	-63.925	-63.93
-2.9727	-59.45	-63.202	-63.241	-62.991	-63.219	-63.298	-63.47	-63.676	-63.874	-63.617	-63.838	-63.841
-2.9707	-59.556	-63.278	-63.23	-62.992	-63.293	-63.359	-63.371	-63.59	-63.792	-63.497	-63.757	-63.763
-2.9687	-59.772	-63.322	-63.204	-62.978	-63.336	-63.384	-63.171	-63.509	-63.718	-63.374	-63.683	-63.695
-2.9667	-59.722	-63.349	-63.168	-62.949	-63.361	-63.396	-62.925	-63.446	-63.63	-63.243	-63.615	-63.633
-2.9647	-59.216	-63.294	-63.07	-62.832	-63.308	-63.332	-62.732	-63.443	-63.608	-63.218	-63.592	-63.621
-2.9627	-58.392	-63.117	-62.87	-62.599	-63.137	-63.156	-62.599	-63.522	-63.664	-63.301	-63.635	-63.671
-2.9607	-57.63	-62.891	-62.684	-62.378	-62.917	-62.931	-62.482	-63.642	-63.755	-63.429	-63.729	-63.77
-2.9587	-56.707	-62.659	-62.509	-62.157	-62.685	-62.702	-62.572	-63.778	-63.883	-63.613	-63.857	-63.894
-2.9567	-55.887	-62.436	-62.339	-61.944	-62.462	-62.486	-62.905	-63.972	-64.058	-63.843	-64.039	-64.07
-2.9547	-55.682	-62.299	-62.278	-61.858	-62.323	-62.341	-63.202	-64.159	-64.206	-64.034	-64.229	-64.254
-2.9527	-55.66	-62.257	-62.282	-61.851	-62.288	-62.293	-63.38	-64.268	-64.257	-64.095	-64.349	-64.369
-2.9507	-55.771	-62.266	-62.322	-61.885	-62.3	-62.29	-63.422	-64.263	-64.213	-64.026	-64.371	-64.387
-2.9487	-55.948	-62.285	-62.346	-61.908	-62.316	-62.297	-63.331	-64.148	-64.075	-63.839	-64.28	-64.29
-2.9467	-56.439	-62.329	-62.396	-61.979	-62.356	-62.336	-63.004	-63.995	-63.86	-63.551	-64.128	-64.135
-2.9447	-56.795	-62.384	-62.452	-62.056	-62.404	-62.388	-62.486	-63.783	-63.608	-63.248	-63.917	-63.922
-2.9427	-56.79	-62.372	-62.413	-62.026	-62.388	-62.39	-62.132	-63.582	-63.454	-63.058	-63.72	-63.722
-2.9407	-57.103	-62.351	-62.398	-62.033	-62.352	-62.375	-61.941	-63.42	-63.39	-62.969	-63.572	-63.57
-2.9387	-57.601	-62.403	-62.462	-62.128	-62.39	-62.436	-61.941	-63.312	-63.394	-62.982	-63.483	-63.477
-2.9367	-57.982	-62.505	-62.567	-62.264	-62.492	-62.552	-62.064	-63.323	-63.485	-63.12	-63.495	-63.493
-2.9347	-58.028	-62.598	-62.645	-62.344	-62.59	-62.655	-62.386	-63.399	-63.643	-63.337	-63.579	-63.585
-2.9327	-58.025	-62.68	-62.71	-62.406	-62.684	-62.741	-62.889	-63.534	-63.847	-63.597	-63.723	-63.737
-2.9307	-58.073	-62.783	-62.805	-62.503	-62.798	-62.842	-63.377	-63.694	-64.019	-63.83	-63.887	-63.91
-2.9287	-57.921	-62.887	-62.878	-62.575	-62.918	-62.952	-63.779	-63.838	-64.154	-64.03	-64.029	-64.064
-2.9267	-57.723	-62.955	-62.915	-62.606	-63	-63.026	-63.992	-63.967	-64.243	-64.163	-64.14	-64.19
-2.9247	-57.765	-63.033	-62.97	-62.661	-63.082	-63.101	-64.026	-63.955	-64.257	-64.186	-64.149	-64.207
-2.9227	-58.244	-63.157	-63.082	-62.801	-63.205	-63.217	-63.87	-63.799	-64.174	-64.097	-64.034	-64.097
-2.9207	-58.75	-63.308	-63.214	-62.963	-63.353	-63.364	-63.411	-63.51	-63.986	-63.882	-63.796	-63.865
-2.9187	-59.218	-63.426	-63.308	-63.077	-63.47	-63.48	-62.714	-63.103	-63.715	-63.564	-63.442	-63.517
-2.9167	-59.495	-63.494	-63.365	-63.136	-63.537	-63.544	-62.024	-62.741	-63.452	-63.248	-63.111	-63.182
-2.9147	-59.385	-63.475	-63.321	-63.075	-63.52	-63.526	-61.469	-62.422	-63.224	-62.961	-62.824	-62.889
-2.9127	-59.003	-63.338	-63.166	-62.892	-63.39	-63.394	-61.142	-62.27	-63.064	-62.749	-62.665	-62.718
-2.9107	-58.368	-63.137	-62.966	-62.65	-63.197	-63.204	-60.916	-62.255	-62.992	-62.639	-62.621	-62.665
-2.9087	-57.907	-62.939	-62.785	-62.436	-62.997	-63.003	-60.985	-62.363	-63.011	-62.637	-62.686	-62.718
-2.9067	-57.553	-62.814	-62.68	-62.31	-62.868	-62.872	-61.367	-62.613	-63.131	-62.739	-62.884	-62.904
-2.9047	-57.454	-62.759	-62.632	-62.263	-62.809	-62.81	-61.769	-62.806	-63.264	-62.857	-63.064	-63.076
-2.9027	-57.69	-62.808	-62.699	-62.353	-62.849	-62.847	-62.19	-62.963	-63.399	-62.998	-63.214	-63.216
-2.9007	-57.912	-62.935	-62.826	-62.508	-62.971	-62.964	-62.453	-63.056	-63.506	-63.118	-63.311	-63.31
-2.8987	-58.075	-63.054	-62.938	-62.636	-63.081	-63.074	-62.726	-63.154	-63.588	-63.214	-63.401	-63.397
-2.8967	-58.041	-63.121	-62.986	-62.69	-63.145	-63.148	-62.956	-63.26	-63.678	-63.315	-63.502	-63.495
-2.8947	-57.797	-63.082	-62.921	-62.625	-63.111	-63.126	-63.008	-63.345	-63.754	-63.428	-63.581	-63.571
-2.8927	-57.287	-62.923	-62.744	-62.432	-62.96	-62.988	-63.043	-63.532	-63.845	-63.559	-63.721	-63.712
-2.8907	-56.655	-62.665	-62.483	-62.139	-62.71	-62.75	-63.038	-63.758	-63.925	-63.654	-63.9	-63.897
-2.8887	-56.244	-62.377	-62.223	-61.849	-62.426	-62.479	-63.091	-63.978	-64.016	-63.766	-64.078	-64.077
-2.8867	-56.053	-62.145	-62.028	-61.64	-62.207	-62.264	-63.089	-64.163	-64.106	-63.874	-64.234	-64.237
-2.8847	-56.263	-62.016	-61.952	-61.57	-62.089	-62.142	-63.012	-64.304	-64.16	-63.942	-64.352	-64.358
-2.8827	-56.758	-62.051	-62.053	-61.674	-62.125	-62.171	-63.031	-64.376	-64.179	-63.948	-64.424	-64.434
-2.8807	-57.418	-62.221	-62.27	-61.904	-62.293	-62.332	-63.03	-64.324	-64.137	-63.886	-64.403	-64.415
-2.8787	-58.202	-62.473	-62.541	-62.198	-62.545	-62.576	-62.956	-64.21	-64.071	-63.826	-64.317	-64.33
-2.8767	-59.015	-62.768	-62.825	-62.518	-62.84	-62.864	-62.952	-64.087	-64.003	-63.756	-64.223	-64.236
-2.8747	-59.648	-63.053	-63.07	-62.794	-63.115	-63.135	-63.039	-63.963	-63.929	-63.667	-64.126	-64.139
-2.8727	-59.726	-63.251	-63.207	-62.941	-63.305	-63.322	-63.102	-63.811	-63.851	-63.572	-64.013	-64.027
-2.8707	-59.265	-63.274	-63.151	-62.886	-63.329	-63.343	-63.055	-63.688	-63.768	-63.491	-63.896	-63.911
-2.8687	-58.498	-63.149	-62.967	-62.684	-63.206	-63.219	-63.08	-63.667	-63.756	-63.48	-63.854	-63.871
-2.8667	-57.57	-62.93	-62.724	-62.415	-62.988	-63	-63.201	-63.707	-63.806	-63.533	-63.871	-63.892
-2.8647	-56.537	-62.676	-62.495	-62.14	-62.738	-62.749	-63.213	-63.762	-63.859	-63.602	-63.906	-63.932
-2.8627	-55.362	-62.38	-62.237	-61.825	-62.455	-62.468	-63.121	-63.773	-63.914	-63.695	-63.918	-63.949
-2.8607	-54.446	-62.068	-61.97	-61.504	-62.16	-62.179	-63.082	-63.783	-63.962	-63.783	-63.918	-63.954
-2.8587	-54.158	-61.839	-61.823	-61.316	-61.943	-61.966	-63.066	-63.755	-64.014	-63.862	-63.912	-63.953
-2.8567	-54.244	-61.728	-61.796	-61.269	-61.844	-61.871	-62.933	-63.647	-64.004	-63.879	-63.844	-63.886
-2.8547	-54.539	-61.703	-61.841	-61.304	-61.827	-61.862	-62.636	-63.466	-63.922	-63.802	-63.719	-63.753
-2.8527	-54.842	-61.698	-61.875	-61.337	-61.831	-61.875	-62.25	-63.2	-63.783	-63.631	-63.516	-63.543
-2.8507	-55.422	-61.753	-61.961	-61.444	-61.879	-61.931	-61.879	-62.967	-63.608	-63.394	-63.305	-63.324
-2.8487	-56.144	-61.891	-62.133	-61.65	-62.006	-62.062	-61.494	-62.789	-63.434	-63.152	-63.135	-63.147
-2.8467	-56.687	-62.081	-62.33	-61.882	-62.183	-62.244	-61.193	-62.683	-63.283	-62.942	-63.018	-63.02
-2.8447	-57.139	-62.295	-62.53	-62.118	-62.379	-62.443	-60.924	-62.553	-63.148	-62.742	-62.901	-62.897
-2.8427	-57.275	-62.496	-62.68	-62.296	-62.575	-62.632	-60.778	-62.386	-62.991	-62.534	-62.737	-62.743
-2.8407	-57.057	-62.633	-62.737	-62.369	-62.705	-62.755	-60.84	-62.297	-62.889	-62.424	-62.634	-62.65
-2.8387	-56.735	-62.67	-62.722	-62.353	-62.743	-62.787	-61.007	-62.221	-62.861	-62.428	-62.574	-62.598
-2.8367	-56.193	-62.627	-62.643	-62.259	-62.704	-62.743	-61.163	-62.15	-62.879	-62.493	-62.525	-62.559
-2.8347	-55.614	-62.489	-62.473	-62.068	-62.574	-62.609	-61.249	-62.097	-62.887	-62.527	-62.484	-62.53
-2.8327	-55.225	-62.307	-62.286	-61.859	-62.4	-62.43	-61.459	-62.16	-62.93	-62.611	-62.513	-62.574
-2.8307	-55.155	-62.148	-62.151	-61.712	-62.241	-62.271	-61.829	-62.397	-63.105	-62.835	-62.707	-62.767
-2.8287	-55.598	-62.089	-62.145	-61.713	-62.174	-62.209	-62.239	-62.71	-63.35	-63.109	-62.981	-63.038
-2.8267	-56.067	-62.144	-62.21	-61.793	-62.214	-62.253	-62.623	-63.087	-63.598	-63.371	-63.301	-63.355
-2.8247	-56.685	-62.261	-62.316	-61.925	-62.315	-62.359	-63.067	-63.437	-63.825	-63.605	-63.611	-63.664
-2.8227	-57.229	-62.438	-62.491	-62.126	-62.48	-62.527	-63.554	-63.715	-64.06	-63.875	-63.875	-63.924
-2.8207	-57.457	-62.598	-62.624	-62.276	-62.631	-62.683	-63.952	-63.949	-64.26	-64.087	-64.106	-64.145
-2.8187	-57.683	-62.732	-62.742	-62.406	-62.755	-62.811	-64.11	-64.087	-64.353	-64.173	-64.25	-64.284
-2.8167	-57.643	-62.822	-62.804	-62.468	-62.85	-62.899	-64.002	-64.067	-64.309	-64.094	-64.254	-64.28
-2.8147	-57.41	-62.831	-62.796	-62.45	-62.871	-62.913	-63.706	-63.905	-64.147	-63.878	-64.122	-64.14
-2.8127	-57.051	-62.77	-62.729	-62.364	-62.823	-62.857	-63.335	-63.721	-63.954	-63.63	-63.945	-63.955
-2.8107	-56.869	-62.674	-62.611	-62.239	-62.731	-62.757	-62.942	-63.569	-63.755	-63.37	-63.788	-63.79
-2.8087	-56.995	-62.611	-62.557	-62.188	-62.67	-62.686	-62.58	-63.409	-63.601	-63.192	-63.634	-63.631
-2.8067	-57.097	-62.566	-62.508	-62.151	-62.629	-62.635	-62.392	-63.258	-63.509	-63.097	-63.497	-63.491
-2.8047	-57.514	-62.568	-62.525	-62.197	-62.626	-62.625	-62.31	-63.189	-63.48	-63.094	-63.434	-63.431
-2.8027	-58.265	-62.673	-62.648	-62.359	-62.722	-62.714	-62.338	-63.192	-63.526	-63.176	-63.446	-63.448
-2.8007	-59.129	-62.861	-62.841	-62.6	-62.901	-62.885	-62.339	-63.193	-63.557	-63.222	-63.466	-63.472
-2.7987	-59.747	-63.069	-63.059	-62.845	-63.107	-63.083	-62.318	-63.199	-63.577	-63.247	-63.481	-63.491
-2.7967	-60.112	-63.235	-63.205	-63.007	-63.268	-63.238	-62.273	-63.182	-63.568	-63.224	-63.478	-63.493
-2.7947	-60.326	-63.368	-63.329	-63.13	-63.396	-63.361	-62.157	-63.173	-63.532	-63.163	-63.459	-63.478
-2.7927	-60.212	-63.43	-63.364	-63.15	-63.457	-63.425	-62.271	-63.244	-63.571	-63.201	-63.498	-63.516
-2.7907	-59.853	-63.402	-63.317	-63.077	-63.431	-63.405	-62.592	-63.405	-63.701	-63.358	-63.622	-63.639
-2.7887	-59.373	-63.307	-63.216	-62.944	-63.338	-63.318	-63.049	-63.636	-63.929	-63.653	-63.829	-63.844
-2.7867	-59.053	-63.178	-63.098	-62.803	-63.213	-63.2	-63.535	-63.869	-64.173	-63.976	-64.054	-64.068
-2.7847	-58.851	-63.069	-63.017	-62.703	-63.108	-63.108	-63.98	-64.138	-64.397	-64.278	-64.296	-64.307
-2.7827	-58.623	-62.958	-62.925	-62.596	-63	-63.016	-64.36	-64.392	-64.587	-64.539	-64.534	-64.543
-2.7807	-58.215	-62.825	-62.808	-62.46	-62.871	-62.899	-64.507	-64.537	-64.673	-64.658	-64.682	-64.691
-2.7787	-57.987	-62.685	-62.696	-62.334	-62.73	-62.768	-64.39	-64.568	-64.64	-64.632	-64.716	-64.725
-2.7767	-57.934	-62.596	-62.643	-62.275	-62.636	-62.685	-64.114	-64.541	-64.509	-64.487	-64.673	-64.683
-2.7747	-57.815	-62.56	-62.621	-62.252	-62.584	-62.648	-63.676	-64.484	-64.328	-64.284	-64.592	-64.602
-2.7727	-57.647	-62.549	-62.608	-62.239	-62.563	-62.632	-63.295	-64.391	-64.151	-64.087	-64.482	-64.493
-2.7707	-57.727	-62.584	-62.642	-62.283	-62.591	-62.66	-63.006	-64.302	-64.021	-63.951	-64.378	-64.386
-2.7687	-58.413	-62.727	-62.802	-62.475	-62.719	-62.788	-62.81	-64.256	-63.955	-63.901	-64.315	-64.321
-2.7667	-58.959	-62.966	-63.035	-62.74	-62.947	-63.016	-62.767	-64.259	-63.952	-63.918	-64.302	-64.306
-2.7647	-59.206	-63.161	-63.196	-62.925	-63.134	-63.202	-62.718	-64.254	-63.967	-63.925	-64.299	-64.301
-2.7627	-59.549	-63.318	-63.33	-63.084	-63.293	-63.351	-62.88	-64.209	-63.986	-63.908	-64.269	-64.268
-2.7607	-59.722	-63.438	-63.423	-63.201	-63.415	-63.468	-63.007	-64.151	-64.009	-63.885	-64.229	-64.227
-2.7587	-59.637	-63.49	-63.443	-63.234	-63.466	-63.516	-63.079	-64.088	-63.999	-63.826	-64.185	-64.186
-2.7567	-59.233	-63.451	-63.371	-63.157	-63.429	-63.478	-63.098	-64.006	-63.953	-63.722	-64.119	-64.121
-2.7547	-59.058	-63.336	-63.251	-63.031	-63.315	-63.359	-63.077	-63.882	-63.875	-63.584	-64.014	-64.02
-2.7527	-59.217	-63.276	-63.217	-63.002	-63.265	-63.3	-63.219	-63.744	-63.84	-63.541	-63.901	-63.911
-2.7507	-59.188	-63.239	-63.181	-62.967	-63.24	-63.27	-63.311	-63.674	-63.879	-63.623	-63.847	-63.86
-2.7487	-59.37	-63.204	-63.16	-62.94	-63.214	-63.239	-63.428	-63.62	-63.933	-63.725	-63.82	-63.836
-2.7467	-59.54	-63.18	-63.155	-62.926	-63.202	-63.223	-63.519	-63.539	-63.993	-63.822	-63.772	-63.788
-2.7447	-59.625	-63.161	-63.159	-62.925	-63.199	-63.214	-63.517	-63.403	-64.028	-63.888	-63.683	-63.702
-2.7427	-59.453	-63.142	-63.142	-62.903	-63.202	-63.213	-63.433	-63.251	-64.026	-63.913	-63.569	-63.588
-2.7407	-59.155	-63.079	-63.052	-62.803	-63.151	-63.164	-63.254	-63.151	-63.984	-63.877	-63.473	-63.489
-2.7387	-59.044	-63.01	-62.994	-62.737	-63.093	-63.109	-63.095	-63.108	-63.927	-63.795	-63.415	-63.428
-2.7367	-58.938	-62.965	-62.966	-62.713	-63.061	-63.078	-62.866	-63.11	-63.855	-63.689	-63.382	-63.392
-2.7347	-59.053	-62.984	-62.993	-62.76	-63.083	-63.101	-62.671	-63.147	-63.758	-63.543	-63.376	-63.386
-2.7327	-59.333	-63.059	-63.056	-62.846	-63.156	-63.174	-62.644	-63.271	-63.697	-63.439	-63.432	-63.442
-2.7307	-59.631	-63.162	-63.147	-62.952	-63.251	-63.265	-62.713	-63.47	-63.693	-63.386	-63.574	-63.582
-2.7287	-59.788	-63.248	-63.232	-63.045	-63.333	-63.341	-62.76	-63.624	-63.696	-63.322	-63.713	-63.722
-2.7267	-59.891	-63.308	-63.275	-63.092	-63.378	-63.383	-62.706	-63.624	-63.618	-63.179	-63.726	-63.743
-2.7247	-59.98	-63.353	-63.309	-63.118	-63.4	-63.405	-62.696	-63.547	-63.526	-63.039	-63.662	-63.691
-2.7227	-59.876	-63.344	-63.303	-63.089	-63.374	-63.379	-62.697	-63.445	-63.489	-62.996	-63.585	-63.623
-2.7207	-59.673	-63.286	-63.259	-63.021	-63.302	-63.306	-62.631	-63.301	-63.455	-62.957	-63.483	-63.53
-2.7187	-59.681	-63.231	-63.232	-62.984	-63.236	-63.248	-62.521	-63.131	-63.396	-62.895	-63.345	-63.403
-2.7167	-59.976	-63.26	-63.297	-63.05	-63.253	-63.274	-62.441	-62.998	-63.322	-62.83	-63.212	-63.277
-2.7147	-60.175	-63.35	-63.399	-63.156	-63.343	-63.366	-62.487	-63.025	-63.352	-62.892	-63.209	-63.273
-2.7127	-60.336	-63.446	-63.481	-63.249	-63.452	-63.471	-62.648	-63.155	-63.463	-63.031	-63.325	-63.376
-2.7107	-60.707	-63.579	-63.595	-63.383	-63.593	-63.612	-62.683	-63.341	-63.551	-63.128	-63.483	-63.522
-2.7087	-61.111	-63.75	-63.74	-63.549	-63.773	-63.793	-62.602	-63.518	-63.6	-63.184	-63.631	-63.659
-2.7067	-61.335	-63.916	-63.86	-63.685	-63.944	-63.959	-62.509	-63.642	-63.647	-63.26	-63.736	-63.752
-2.7047	-61.293	-64.01	-63.898	-63.734	-64.045	-64.056	-62.511	-63.772	-63.768	-63.443	-63.858	-63.865
-2.7027	-61.35	-64.047	-63.893	-63.745	-64.084	-64.095	-62.504	-63.871	-63.879	-63.603	-63.965	-63.969
-2.7007	-61.38	-64.071	-63.894	-63.759	-64.104	-64.117	-62.428	-63.93	-63.938	-63.71	-64.024	-64.031
-2.6987	-61.225	-64.061	-63.849	-63.721	-64.093	-64.107	-62.621	-63.976	-64.017	-63.847	-64.077	-64.085
-2.6967	-60.654	-63.962	-63.704	-63.568	-63.998	-64.013	-63.048	-64.106	-64.175	-64.068	-64.199	-64.207
-2.6947	-59.973	-63.757	-63.471	-63.316	-63.802	-63.819	-63.502	-64.332	-64.368	-64.311	-64.407	-64.416
-2.6927	-59.354	-63.497	-63.212	-63.031	-63.552	-63.571	-63.874	-64.549	-64.516	-64.487	-64.61	-64.619
-2.6907	-58.661	-63.223	-62.963	-62.742	-63.287	-63.308	-64.143	-64.725	-64.62	-64.613	-64.772	-64.78
-2.6887	-58.013	-62.944	-62.718	-62.46	-63.016	-63.043	-64.329	-64.86	-64.699	-64.704	-64.894	-64.901
-2.6867	-57.497	-62.69	-62.534	-62.241	-62.767	-62.8	-64.262	-64.938	-64.722	-64.728	-64.962	-64.969
-2.6847	-57.758	-62.556	-62.513	-62.212	-62.635	-62.672	-64.031	-64.92	-64.672	-64.673	-64.943	-64.951
-2.6827	-58.277	-62.596	-62.648	-62.355	-62.675	-62.715	-63.699	-64.832	-64.58	-64.568	-64.856	-64.865
-2.6807	-58.872	-62.751	-62.864	-62.584	-62.826	-62.869	-63.289	-64.697	-64.451	-64.422	-64.723	-64.731
-2.6787	-59.694	-62.977	-63.132	-62.879	-63.049	-63.095	-62.89	-64.535	-64.313	-64.264	-64.56	-64.564
-2.6767	-60.586	-63.25	-63.425	-63.197	-63.323	-63.364	-62.547	-64.373	-64.178	-64.103	-64.398	-64.399
-2.6747	-61.315	-63.509	-63.667	-63.462	-63.589	-63.624	-62.324	-64.201	-64.063	-63.952	-64.238	-64.236
-2.6727	-61.599	-63.697	-63.796	-63.601	-63.777	-63.806	-62.102	-64.015	-63.938	-63.777	-64.071	-64.066
-2.6707	-61.699	-63.797	-63.84	-63.647	-63.872	-63.897	-62.067	-63.833	-63.821	-63.613	-63.906	-63.897
-2.6687	-61.787	-63.83	-63.838	-63.645	-63.904	-63.924	-62.113	-63.694	-63.745	-63.495	-63.784	-63.775
-2.6667	-61.728	-63.815	-63.799	-63.601	-63.891	-63.907	-62.252	-63.586	-63.703	-63.417	-63.703	-63.702
-2.6647	-61.748	-63.8	-63.783	-63.589	-63.871	-63.883	-62.303	-63.479	-63.669	-63.368	-63.621	-63.632
-2.6627	-61.973	-63.842	-63.829	-63.646	-63.899	-63.904	-62.257	-63.42	-63.635	-63.334	-63.557	-63.578
-2.6607	-62.145	-63.921	-63.909	-63.733	-63.971	-63.971	-62.302	-63.43	-63.663	-63.389	-63.549	-63.578
-2.6587	-62.334	-63.975	-63.964	-63.792	-64.027	-64.02	-62.297	-63.482	-63.73	-63.492	-63.584	-63.619
-2.6567	-62.535	-64.042	-64.037	-63.878	-64.091	-64.078	-62.336	-63.542	-63.806	-63.605	-63.626	-63.664
-2.6547	-62.64	-64.118	-64.105	-63.956	-64.16	-64.138	-62.216	-63.621	-63.85	-63.675	-63.673	-63.705
-2.6527	-62.547	-64.14	-64.103	-63.954	-64.178	-64.154	-62.256	-63.73	-63.885	-63.72	-63.751	-63.768
-2.6507	-62.308	-64.109	-64.048	-63.893	-64.15	-64.129	-62.45	-63.846	-63.954	-63.796	-63.861	-63.865
-2.6487	-62.194	-64.054	-63.983	-63.83	-64.094	-64.075	-62.531	-63.936	-63.971	-63.798	-63.953	-63.951
-2.6467	-62.009	-64.047	-63.957	-63.812	-64.078	-64.062	-62.52	-63.976	-63.934	-63.739	-64.001	-63.994
-2.6447	-61.356	-63.983	-63.844	-63.686	-64.013	-63.999	-62.367	-63.923	-63.844	-63.62	-63.978	-63.967
-2.6427	-60.603	-63.833	-63.657	-63.476	-63.866	-63.857	-62.435	-63.796	-63.767	-63.524	-63.894	-63.883
-2.6407	-59.671	-63.651	-63.445	-63.235	-63.683	-63.684	-62.473	-63.678	-63.746	-63.504	-63.814	-63.805
-2.6387	-58.642	-63.39	-63.169	-62.922	-63.413	-63.428	-62.485	-63.58	-63.731	-63.497	-63.745	-63.738
-2.6367	-57.693	-63.095	-62.897	-62.609	-63.111	-63.14	-62.653	-63.532	-63.798	-63.593	-63.721	-63.712
-2.6347	-57.065	-62.807	-62.67	-62.339	-62.817	-62.858	-62.919	-63.555	-63.921	-63.749	-63.762	-63.754
-2.6327	-57.156	-62.645	-62.6	-62.258	-62.641	-62.691	-63.312	-63.709	-64.099	-63.967	-63.905	-63.9
-2.6307	-57.506	-62.633	-62.66	-62.324	-62.616	-62.675	-63.555	-63.947	-64.273	-64.168	-64.119	-64.116
-2.6287	-58.009	-62.695	-62.774	-62.451	-62.674	-62.731	-63.714	-64.157	-64.384	-64.289	-64.311	-64.312
-2.6267	-58.57	-62.839	-62.947	-62.645	-62.83	-62.871	-63.814	-64.316	-64.46	-64.366	-64.457	-64.462
-2.6247	-58.964	-63.012	-63.104	-62.822	-63.012	-63.037	-63.803	-64.421	-64.478	-64.372	-64.551	-64.559
-2.6227	-59.098	-63.139	-63.186	-62.916	-63.15	-63.164	-63.66	-64.46	-64.442	-64.317	-64.58	-64.592
-2.6207	-58.946	-63.189	-63.175	-62.901	-63.215	-63.225	-63.515	-64.447	-64.376	-64.224	-64.55	-64.566
-2.6187	-58.607	-63.145	-63.08	-62.788	-63.188	-63.193	-63.463	-64.431	-64.327	-64.164	-64.515	-64.535
-2.6167	-58.464	-63.068	-62.974	-62.672	-63.118	-63.123	-63.51	-64.427	-64.327	-64.17	-64.503	-64.528
-2.6147	-58.419	-62.995	-62.889	-62.578	-63.044	-63.054	-63.514	-64.389	-64.324	-64.17	-64.473	-64.503
-2.6127	-58.324	-62.909	-62.806	-62.486	-62.963	-62.977	-63.463	-64.32	-64.282	-64.127	-64.412	-64.447
-2.6107	-57.968	-62.808	-62.704	-62.368	-62.869	-62.886	-63.487	-64.247	-64.251	-64.098	-64.351	-64.389
-2.6087	-57.499	-62.638	-62.549	-62.187	-62.71	-62.726	-63.437	-64.118	-64.223	-64.082	-64.275	-64.309
-2.6067	-57.336	-62.491	-62.455	-62.08	-62.568	-62.582	-63.204	-63.911	-64.168	-64.031	-64.137	-64.168
-2.6047	-57.216	-62.409	-62.432	-62.04	-62.49	-62.503	-62.8	-63.67	-64.036	-63.871	-63.945	-63.972
-2.6027	-57.005	-62.375	-62.439	-62.035	-62.46	-62.475	-62.388	-63.479	-63.896	-63.705	-63.775	-63.798
-2.6007	-57.009	-62.387	-62.472	-62.062	-62.472	-62.489	-62.069	-63.324	-63.8	-63.588	-63.642	-63.662
-2.5987	-57.692	-62.501	-62.622	-62.233	-62.577	-62.596	-61.835	-63.203	-63.725	-63.495	-63.535	-63.553
-2.5967	-58.617	-62.79	-62.924	-62.582	-62.85	-62.868	-61.689	-63.202	-63.678	-63.43	-63.501	-63.518
-2.5947	-59.296	-63.123	-63.214	-62.92	-63.167	-63.19	-61.772	-63.324	-63.692	-63.439	-63.572	-63.588
-2.5927	-59.676	-63.401	-63.414	-63.167	-63.43	-63.46	-62.016	-63.525	-63.787	-63.569	-63.725	-63.74
-2.5907	-60.273	-63.609	-63.563	-63.36	-63.62	-63.653	-62.416	-63.785	-63.935	-63.761	-63.937	-63.95
-2.5887	-60.887	-63.817	-63.743	-63.584	-63.809	-63.843	-62.875	-64.085	-64.114	-63.987	-64.187	-64.199
-2.5867	-61.04	-63.968	-63.847	-63.717	-63.948	-63.985	-63.273	-64.362	-64.283	-64.198	-64.426	-64.442
-2.5847	-61.114	-64.012	-63.858	-63.742	-63.984	-64.024	-63.584	-64.524	-64.39	-64.328	-64.579	-64.599
-2.5827	-61.184	-64.015	-63.856	-63.742	-63.989	-64.022	-63.818	-64.587	-64.44	-64.388	-64.64	-64.664
-2.5807	-61.293	-63.994	-63.844	-63.723	-63.975	-63.999	-64.043	-64.609	-64.483	-64.424	-64.664	-64.692
-2.5787	-61.107	-63.963	-63.818	-63.683	-63.955	-63.974	-64.146	-64.573	-64.488	-64.405	-64.641	-64.674
-2.5767	-60.578	-63.844	-63.688	-63.525	-63.858	-63.875	-64.125	-64.474	-64.4	-64.268	-64.556	-64.593
-2.5747	-59.906	-63.637	-63.476	-63.278	-63.673	-63.689	-64.054	-64.376	-64.297	-64.118	-64.462	-64.494
-2.5727	-59.092	-63.374	-63.229	-62.988	-63.435	-63.45	-63.96	-64.286	-64.236	-64.033	-64.386	-64.414
-2.5707	-58.265	-63.064	-62.945	-62.659	-63.145	-63.163	-63.681	-64.159	-64.142	-63.909	-64.284	-64.308
-2.5687	-57.693	-62.787	-62.714	-62.391	-62.88	-62.904	-63.277	-63.971	-63.974	-63.706	-64.121	-64.143
-2.5667	-57.461	-62.57	-62.544	-62.191	-62.672	-62.698	-62.883	-63.761	-63.805	-63.514	-63.934	-63.952
-2.5647	-57.699	-62.486	-62.509	-62.148	-62.583	-62.608	-62.545	-63.591	-63.743	-63.472	-63.787	-63.803
-2.5627	-58.379	-62.574	-62.649	-62.3	-62.661	-62.685	-62.188	-63.418	-63.693	-63.441	-63.646	-63.666
-2.5607	-59.233	-62.804	-62.879	-62.56	-62.876	-62.896	-61.935	-63.324	-63.621	-63.371	-63.542	-63.566
-2.5587	-60.28	-63.141	-63.194	-62.922	-63.192	-63.203	-61.984	-63.342	-63.617	-63.369	-63.533	-63.556
-2.5567	-61.12	-63.505	-63.505	-63.287	-63.539	-63.542	-62.23	-63.425	-63.697	-63.463	-63.602	-63.623
-2.5547	-61.753	-63.844	-63.775	-63.616	-63.863	-63.857	-62.514	-63.527	-63.8	-63.576	-63.699	-63.718
-2.5527	-62.137	-64.105	-63.967	-63.853	-64.114	-64.095	-62.725	-63.606	-63.831	-63.599	-63.768	-63.786
-2.5507	-62.375	-64.263	-64.074	-63.987	-64.264	-64.229	-63.024	-63.691	-63.852	-63.609	-63.84	-63.852
-2.5487	-62.425	-64.33	-64.12	-64.046	-64.327	-64.281	-63.258	-63.722	-63.892	-63.653	-63.887	-63.891
-2.5467	-62.274	-64.304	-64.081	-64.009	-64.303	-64.25	-63.271	-63.704	-63.922	-63.704	-63.891	-63.891
-2.5447	-62.183	-64.238	-64.034	-63.956	-64.234	-64.173	-63.113	-63.68	-63.901	-63.697	-63.87	-63.866
-2.5427	-62.055	-64.162	-63.998	-63.903	-64.156	-64.09	-62.911	-63.663	-63.848	-63.645	-63.843	-63.837
-2.5407	-61.861	-64.093	-63.961	-63.85	-64.087	-64.025	-62.812	-63.639	-63.792	-63.564	-63.814	-63.804
-2.5387	-61.604	-64.02	-63.908	-63.785	-64.016	-63.955	-62.713	-63.649	-63.771	-63.53	-63.801	-63.79
-2.5367	-61.508	-63.953	-63.866	-63.734	-63.95	-63.888	-62.685	-63.719	-63.789	-63.535	-63.841	-63.83
-2.5347	-61.349	-63.913	-63.847	-63.704	-63.913	-63.853	-62.761	-63.815	-63.797	-63.507	-63.909	-63.902
-2.5327	-61.123	-63.852	-63.784	-63.625	-63.857	-63.801	-62.876	-63.886	-63.806	-63.481	-63.97	-63.967
-2.5307	-60.967	-63.785	-63.712	-63.539	-63.792	-63.737	-62.979	-63.916	-63.83	-63.488	-63.994	-63.999
-2.5287	-60.908	-63.719	-63.652	-63.465	-63.727	-63.672	-63.015	-63.907	-63.878	-63.564	-63.962	-63.996
-2.5267	-60.88	-63.692	-63.624	-63.427	-63.704	-63.659	-62.984	-63.788	-63.876	-63.576	-63.851	-63.912
-2.5247	-60.791	-63.7	-63.621	-63.414	-63.713	-63.676	-62.869	-63.577	-63.802	-63.511	-63.656	-63.743
-2.5227	-60.852	-63.714	-63.624	-63.416	-63.724	-63.687	-62.789	-63.308	-63.741	-63.48	-63.41	-63.52
-2.5207	-60.981	-63.773	-63.686	-63.486	-63.779	-63.745	-62.814	-63.092	-63.714	-63.478	-63.196	-63.328
-2.5187	-60.987	-63.832	-63.734	-63.54	-63.839	-63.806	-62.905	-62.97	-63.698	-63.478	-63.072	-63.217
-2.5167	-60.845	-63.85	-63.74	-63.551	-63.859	-63.828	-62.992	-62.954	-63.688	-63.451	-63.091	-63.209
-2.5147	-60.657	-63.822	-63.705	-63.518	-63.83	-63.794	-63.074	-63.072	-63.699	-63.435	-63.206	-63.308
-2.5127	-60.374	-63.741	-63.616	-63.424	-63.752	-63.717	-63.155	-63.212	-63.704	-63.398	-63.311	-63.417
-2.5107	-60.134	-63.66	-63.535	-63.338	-63.677	-63.653	-63.164	-63.388	-63.678	-63.314	-63.429	-63.541
-2.5087	-59.92	-63.573	-63.446	-63.239	-63.597	-63.582	-63.049	-63.514	-63.623	-63.198	-63.489	-63.625
-2.5067	-59.764	-63.496	-63.367	-63.154	-63.524	-63.518	-62.777	-63.514	-63.514	-63.017	-63.426	-63.601
-2.5047	-59.799	-63.46	-63.334	-63.117	-63.49	-63.493	-62.479	-63.395	-63.366	-62.812	-63.232	-63.465
-2.5027	-59.693	-63.436	-63.311	-63.087	-63.471	-63.483	-62.158	-63.215	-63.236	-62.65	-63.003	-63.281
-2.5007	-59.763	-63.432	-63.323	-63.099	-63.469	-63.487	-61.837	-63.032	-63.154	-62.569	-62.806	-63.116
-2.4987	-59.829	-63.431	-63.347	-63.123	-63.474	-63.491	-61.452	-62.752	-63.051	-62.473	-62.511	-62.878
-2.4967	-59.811	-63.422	-63.364	-63.139	-63.47	-63.482	-61.04	-62.401	-62.927	-62.378	-62.206	-62.593
-2.4947	-59.863	-63.416	-63.384	-63.161	-63.468	-63.475	-60.816	-62.134	-62.862	-62.372	-61.987	-62.375
-2.4927	-59.869	-63.41	-63.395	-63.178	-63.464	-63.465	-60.705	-61.955	-62.855	-62.439	-61.857	-62.246
-2.4907	-60.193	-63.434	-63.446	-63.245	-63.487	-63.48	-60.764	-61.806	-62.866	-62.515	-61.748	-62.144
-2.4887	-60.352	-63.485	-63.504	-63.315	-63.537	-63.522	-60.769	-61.742	-62.865	-62.56	-61.742	-62.105
-2.4867	-60.346	-63.516	-63.503	-63.318	-63.562	-63.54	-60.841	-61.852	-62.91	-62.637	-61.944	-62.223
-2.4847	-60.469	-63.536	-63.485	-63.303	-63.574	-63.554	-61.103	-62.108	-63.027	-62.781	-62.244	-62.457
-2.4827	-60.644	-63.571	-63.501	-63.323	-63.602	-63.584	-61.367	-62.407	-63.177	-62.944	-62.579	-62.735
-2.4807	-60.833	-63.634	-63.554	-63.374	-63.658	-63.645	-61.568	-62.695	-63.324	-63.089	-62.903	-63.004
-2.4787	-60.785	-63.686	-63.572	-63.384	-63.71	-63.704	-61.604	-62.908	-63.403	-63.143	-63.139	-63.207
-2.4767	-60.844	-63.717	-63.577	-63.381	-63.739	-63.741	-61.848	-63.034	-63.463	-63.186	-63.247	-63.318
-2.4747	-60.907	-63.751	-63.605	-63.404	-63.775	-63.784	-62.196	-63.082	-63.569	-63.297	-63.266	-63.369
-2.4727	-60.675	-63.775	-63.619	-63.415	-63.803	-63.815	-62.329	-63.046	-63.605	-63.315	-63.216	-63.351
-2.4707	-60.2	-63.727	-63.539	-63.324	-63.762	-63.778	-62.333	-62.913	-63.547	-63.22	-63.068	-63.244
-2.4687	-59.645	-63.592	-63.376	-63.142	-63.634	-63.65	-62.329	-62.723	-63.44	-63.061	-62.828	-63.059
-2.4667	-59.062	-63.407	-63.188	-62.927	-63.451	-63.466	-62.307	-62.62	-63.372	-62.964	-62.699	-62.946
-2.4647	-58.361	-63.178	-62.968	-62.679	-63.225	-63.237	-62.032	-62.551	-63.311	-62.869	-62.629	-62.881
-2.4627	-57.897	-62.967	-62.796	-62.487	-63.013	-63.02	-61.584	-62.473	-63.154	-62.655	-62.533	-62.784
-2.4607	-57.751	-62.809	-62.69	-62.362	-62.851	-62.854	-61.305	-62.462	-63.042	-62.506	-62.475	-62.723
-2.4587	-57.694	-62.732	-62.667	-62.325	-62.768	-62.766	-61.052	-62.506	-62.99	-62.433	-62.494	-62.721
-2.4567	-57.718	-62.718	-62.687	-62.344	-62.751	-62.746	-60.795	-62.609	-62.952	-62.387	-62.614	-62.788
-2.4547	-57.904	-62.775	-62.767	-62.436	-62.804	-62.799	-60.735	-62.701	-62.95	-62.386	-62.712	-62.85
-2.4527	-58.091	-62.883	-62.874	-62.553	-62.912	-62.911	-60.99	-62.841	-63.004	-62.445	-62.851	-62.954
-2.4507	-58.106	-62.974	-62.931	-62.613	-63.007	-63.011	-61.405	-63.037	-63.154	-62.626	-63.059	-63.129
-2.4487	-57.894	-63.007	-62.922	-62.6	-63.047	-63.057	-61.742	-63.169	-63.306	-62.813	-63.247	-63.287
-2.4467	-57.847	-62.989	-62.881	-62.556	-63.033	-63.047	-62.108	-63.276	-63.426	-62.969	-63.383	-63.409
-2.4447	-57.677	-62.958	-62.868	-62.533	-62.995	-63.007	-62.557	-63.392	-63.591	-63.187	-63.488	-63.533
-2.4427	-57.416	-62.872	-62.799	-62.449	-62.895	-62.909	-62.83	-63.502	-63.733	-63.365	-63.585	-63.651
-2.4407	-57.148	-62.76	-62.725	-62.36	-62.758	-62.78	-62.852	-63.54	-63.801	-63.482	-63.611	-63.698
-2.4387	-56.712	-62.606	-62.61	-62.224	-62.579	-62.608	-62.805	-63.531	-63.821	-63.543	-63.584	-63.695
-2.4367	-56.42	-62.441	-62.503	-62.098	-62.385	-62.42	-62.824	-63.615	-63.844	-63.605	-63.6	-63.732
-2.4347	-55.896	-62.284	-62.39	-61.96	-62.203	-62.247	-62.984	-63.798	-63.965	-63.781	-63.726	-63.866
-2.4327	-55.419	-62.118	-62.223	-61.767	-62.03	-62.094	-63.09	-64.017	-64.092	-63.955	-63.947	-64.057
-2.4307	-55.01	-61.975	-62.077	-61.597	-61.896	-61.969	-63.309	-64.214	-64.221	-64.139	-64.165	-64.247
-2.4287	-54.947	-61.884	-61.983	-61.496	-61.832	-61.895	-63.616	-64.436	-64.39	-64.351	-64.409	-64.465
-2.4267	-55.291	-61.914	-62.02	-61.547	-61.887	-61.943	-63.881	-64.635	-64.548	-64.539	-64.638	-64.669
-2.4247	-55.596	-62.014	-62.095	-61.64	-62.02	-62.071	-63.997	-64.706	-64.654	-64.658	-64.778	-64.787
-2.4227	-56.024	-62.126	-62.171	-61.738	-62.164	-62.207	-63.827	-64.624	-64.618	-64.611	-64.764	-64.764
-2.4207	-56.547	-62.25	-62.277	-61.873	-62.308	-62.339	-63.643	-64.441	-64.508	-64.475	-64.606	-64.62
-2.4187	-56.964	-62.387	-62.401	-62.018	-62.458	-62.482	-63.416	-64.26	-64.375	-64.298	-64.428	-64.453
-2.4167	-57.071	-62.48	-62.473	-62.091	-62.557	-62.583	-63.143	-64.041	-64.2	-64.059	-64.216	-64.251
-2.4147	-56.966	-62.5	-62.464	-62.071	-62.58	-62.607	-62.882	-63.814	-64.014	-63.819	-63.993	-64.037
-2.4127	-56.847	-62.485	-62.429	-62.02	-62.562	-62.589	-62.764	-63.648	-63.868	-63.634	-63.812	-63.863
-2.4107	-56.788	-62.47	-62.408	-61.984	-62.542	-62.566	-62.888	-63.551	-63.812	-63.556	-63.72	-63.769
-2.4087	-56.738	-62.462	-62.394	-61.961	-62.529	-62.547	-62.947	-63.459	-63.784	-63.516	-63.669	-63.708
-2.4067	-56.701	-62.445	-62.362	-61.925	-62.507	-62.52	-62.993	-63.378	-63.772	-63.519	-63.619	-63.654
-2.4047	-56.569	-62.404	-62.31	-61.874	-62.466	-62.474	-63.15	-63.375	-63.838	-63.633	-63.63	-63.664
-2.4027	-56.196	-62.297	-62.188	-61.745	-62.363	-62.367	-63.358	-63.449	-63.95	-63.782	-63.709	-63.74
-2.4007	-55.774	-62.127	-62.024	-61.57	-62.199	-62.197	-63.479	-63.504	-64.038	-63.892	-63.785	-63.815
-2.3987	-55.336	-61.95	-61.87	-61.405	-62.027	-62.02	-63.447	-63.559	-64.068	-63.92	-63.826	-63.859
-2.3967	-54.86	-61.772	-61.718	-61.229	-61.858	-61.853	-63.425	-63.653	-64.083	-63.92	-63.878	-63.917
-2.3947	-54.66	-61.617	-61.612	-61.102	-61.71	-61.708	-63.332	-63.667	-64.055	-63.861	-63.886	-63.926
-2.3927	-54.764	-61.545	-61.579	-61.063	-61.636	-61.634	-63.113	-63.595	-63.933	-63.673	-63.824	-63.86
-2.3907	-55.387	-61.621	-61.706	-61.201	-61.704	-61.701	-62.841	-63.463	-63.773	-63.467	-63.701	-63.734
-2.3887	-56.108	-61.828	-61.941	-61.464	-61.903	-61.904	-62.65	-63.372	-63.661	-63.321	-63.607	-63.635
-2.3867	-56.526	-62.027	-62.12	-61.669	-62.099	-62.102	-62.584	-63.308	-63.616	-63.276	-63.557	-63.581
-2.3847	-56.828	-62.172	-62.243	-61.817	-62.238	-62.239	-62.652	-63.291	-63.633	-63.308	-63.551	-63.571
-2.3827	-56.885	-62.275	-62.324	-61.918	-62.336	-62.336	-62.842	-63.434	-63.7	-63.375	-63.662	-63.678
-2.3807	-56.552	-62.302	-62.351	-61.942	-62.356	-62.36	-63.066	-63.628	-63.809	-63.493	-63.825	-63.839
-2.3787	-55.624	-62.175	-62.215	-61.78	-62.221	-62.236	-63.286	-63.816	-63.904	-63.58	-63.984	-64.001
-2.3767	-54.888	-61.945	-62.009	-61.55	-61.983	-62.008	-63.439	-63.973	-63.954	-63.618	-64.095	-64.12
-2.3747	-54.643	-61.81	-61.937	-61.466	-61.836	-61.876	-63.535	-64.109	-63.966	-63.599	-64.178	-64.212
-2.3727	-54.519	-61.784	-61.958	-61.489	-61.804	-61.858	-63.572	-64.191	-63.942	-63.536	-64.217	-64.26
-2.3707	-54.453	-61.811	-61.986	-61.53	-61.82	-61.888	-63.58	-64.204	-63.945	-63.55	-64.205	-64.257
-2.3687	-54.905	-61.911	-62.07	-61.649	-61.92	-61.994	-63.658	-64.242	-64.004	-63.656	-64.198	-64.272
-2.3667	-55.896	-62.162	-62.307	-61.943	-62.18	-62.246	-63.793	-64.312	-64.12	-63.84	-64.21	-64.311
-2.3647	-56.614	-62.456	-62.554	-62.233	-62.48	-62.539	-63.96	-64.402	-64.259	-64.047	-64.262	-64.386
-2.3627	-57.178	-62.671	-62.712	-62.423	-62.695	-62.748	-64.103	-64.46	-64.382	-64.248	-64.261	-64.424
-2.3607	-57.72	-62.821	-62.815	-62.548	-62.834	-62.884	-64.186	-64.481	-64.486	-64.43	-64.221	-64.42
-2.3587	-58.068	-62.915	-62.892	-62.627	-62.924	-62.97	-64.222	-64.46	-64.533	-64.522	-64.136	-64.375
-2.3567	-58.069	-62.925	-62.888	-62.612	-62.925	-62.972	-64.14	-64.391	-64.516	-64.516	-64.035	-64.289
-2.3547	-57.882	-62.856	-62.809	-62.508	-62.839	-62.898	-63.994	-64.32	-64.457	-64.455	-63.968	-64.215
-2.3527	-57.694	-62.796	-62.737	-62.416	-62.774	-62.836	-63.793	-64.237	-64.38	-64.358	-63.898	-64.13
-2.3507	-57.104	-62.687	-62.588	-62.24	-62.674	-62.734	-63.526	-64.153	-64.293	-64.236	-63.895	-64.079
-2.3487	-56.415	-62.519	-62.395	-62.013	-62.525	-62.577	-63.331	-64.069	-64.206	-64.115	-63.908	-64.051
-2.3467	-55.932	-62.354	-62.226	-61.817	-62.377	-62.42	-63.133	-63.983	-64.099	-63.968	-63.933	-64.028
-2.3447	-55.461	-62.219	-62.095	-61.656	-62.258	-62.294	-62.992	-63.855	-63.976	-63.811	-63.918	-63.977
-2.3427	-54.953	-62.07	-61.95	-61.487	-62.127	-62.153	-62.778	-63.633	-63.822	-63.615	-63.806	-63.844
-2.3407	-54.367	-61.879	-61.779	-61.284	-61.954	-61.976	-62.467	-63.349	-63.634	-63.401	-63.621	-63.641
-2.3387	-54.22	-61.743	-61.699	-61.184	-61.825	-61.847	-62.292	-63.101	-63.471	-63.222	-63.412	-63.428
-2.3367	-54.172	-61.697	-61.682	-61.163	-61.783	-61.808	-62.102	-62.948	-63.343	-63.067	-63.266	-63.277
-2.3347	-53.979	-61.658	-61.639	-61.119	-61.751	-61.779	-61.893	-62.839	-63.279	-62.993	-63.151	-63.163
-2.3327	-53.616	-61.593	-61.556	-61.037	-61.695	-61.726	-61.714	-62.834	-63.271	-62.977	-63.105	-63.117
-2.3307	-53.081	-61.486	-61.423	-60.894	-61.597	-61.633	-61.767	-62.994	-63.349	-63.071	-63.191	-63.202
-2.3287	-52.791	-61.382	-61.304	-60.772	-61.493	-61.53	-62.138	-63.269	-63.524	-63.271	-63.392	-63.41
-2.3267	-52.461	-61.306	-61.213	-60.677	-61.418	-61.456	-62.513	-63.565	-63.726	-63.499	-63.632	-63.66
-2.3247	-52.143	-61.217	-61.131	-60.574	-61.329	-61.367	-62.863	-63.808	-63.904	-63.699	-63.837	-63.872
-2.3227	-52.182	-61.181	-61.126	-60.555	-61.286	-61.321	-63.267	-64.03	-64.049	-63.862	-64.033	-64.068
-2.3207	-52.78	-61.255	-61.244	-60.675	-61.346	-61.377	-63.611	-64.165	-64.152	-63.978	-64.165	-64.205
-2.3187	-53.824	-61.49	-61.526	-60.982	-61.564	-61.59	-63.771	-64.174	-64.172	-63.976	-64.187	-64.231
-2.3167	-54.844	-61.806	-61.851	-61.339	-61.869	-61.889	-63.729	-64.116	-64.121	-63.886	-64.141	-64.183
-2.3147	-55.819	-62.104	-62.134	-61.655	-62.158	-62.174	-63.61	-64.035	-64.048	-63.787	-64.077	-64.115
-2.3127	-56.761	-62.39	-62.401	-61.961	-62.435	-62.448	-63.434	-63.939	-64	-63.738	-64.007	-64.042
-2.3107	-57.417	-62.626	-62.599	-62.193	-62.669	-62.683	-63.244	-63.826	-63.941	-63.667	-63.914	-63.949
-2.3087	-57.545	-62.748	-62.668	-62.279	-62.796	-62.812	-63.092	-63.773	-63.88	-63.589	-63.865	-63.895
-2.3067	-57.351	-62.724	-62.604	-62.216	-62.777	-62.793	-63.022	-63.756	-63.881	-63.608	-63.87	-63.894
-2.3047	-57.024	-62.617	-62.495	-62.102	-62.674	-62.691	-62.972	-63.735	-63.896	-63.63	-63.877	-63.898
-2.3027	-56.739	-62.496	-62.403	-62.01	-62.558	-62.576	-62.903	-63.688	-63.88	-63.61	-63.853	-63.873
-2.3007	-56.566	-62.394	-62.331	-61.938	-62.459	-62.476	-62.937	-63.649	-63.854	-63.57	-63.825	-63.843
-2.2987	-56.48	-62.329	-62.305	-61.914	-62.396	-62.409	-63.012	-63.637	-63.863	-63.579	-63.827	-63.842
-2.2967	-56.767	-62.33	-62.364	-61.982	-62.392	-62.4	-63.089	-63.574	-63.904	-63.637	-63.806	-63.821
-2.2947	-57.141	-62.412	-62.484	-62.118	-62.474	-62.48	-63.106	-63.505	-63.895	-63.617	-63.759	-63.775
-2.2927	-57.513	-62.524	-62.602	-62.25	-62.584	-62.589	-63.12	-63.468	-63.893	-63.628	-63.734	-63.75
-2.2907	-57.873	-62.629	-62.685	-62.342	-62.683	-62.688	-63.179	-63.467	-63.929	-63.679	-63.744	-63.76
-2.2887	-58.224	-62.73	-62.769	-62.434	-62.778	-62.782	-63.258	-63.492	-63.954	-63.706	-63.774	-63.79
-2.2867	-58.53	-62.818	-62.834	-62.507	-62.862	-62.866	-63.328	-63.55	-63.978	-63.728	-63.822	-63.833
-2.2847	-58.463	-62.865	-62.837	-62.508	-62.914	-62.923	-63.418	-63.709	-64.011	-63.755	-63.928	-63.933
-2.2827	-58.257	-62.834	-62.772	-62.433	-62.889	-62.902	-63.592	-63.93	-64.117	-63.889	-64.091	-64.093
-2.2807	-58.081	-62.756	-62.691	-62.339	-62.809	-62.83	-63.806	-64.151	-64.25	-64.046	-64.263	-64.262
-2.2787	-57.693	-62.664	-62.614	-62.249	-62.713	-62.743	-64.076	-64.348	-64.379	-64.205	-64.418	-64.413
-2.2767	-57.138	-62.517	-62.477	-62.095	-62.56	-62.603	-64.284	-64.494	-64.517	-64.388	-64.538	-64.53
-2.2747	-56.628	-62.34	-62.329	-61.927	-62.376	-62.432	-64.336	-64.524	-64.577	-64.47	-64.565	-64.564
-2.2727	-56.484	-62.202	-62.232	-61.821	-62.219	-62.284	-64.245	-64.396	-64.549	-64.449	-64.47	-64.476
-2.2707	-56.467	-62.144	-62.209	-61.798	-62.139	-62.213	-63.993	-64.121	-64.414	-64.292	-64.258	-64.268
-2.2687	-56.342	-62.139	-62.205	-61.795	-62.127	-62.198	-63.579	-63.761	-64.2	-64.041	-63.962	-63.977
-2.2667	-56.395	-62.144	-62.199	-61.788	-62.134	-62.199	-63.058	-63.384	-63.95	-63.743	-63.627	-63.65
-2.2647	-56.401	-62.176	-62.223	-61.806	-62.179	-62.23	-62.437	-63.054	-63.688	-63.429	-63.32	-63.35
-2.2627	-56.224	-62.186	-62.204	-61.779	-62.204	-62.241	-61.959	-62.856	-63.513	-63.233	-63.122	-63.153
-2.2607	-55.855	-62.164	-62.155	-61.721	-62.199	-62.224	-61.681	-62.812	-63.437	-63.156	-63.055	-63.085
-2.2587	-55.383	-62.088	-62.058	-61.605	-62.144	-62.156	-61.529	-62.939	-63.455	-63.19	-63.121	-63.152
-2.2567	-55.179	-62.003	-61.981	-61.515	-62.068	-62.077	-61.586	-63.158	-63.548	-63.311	-63.285	-63.314
-2.2547	-55.003	-61.959	-61.948	-61.478	-62.031	-62.041	-61.718	-63.403	-63.677	-63.474	-63.501	-63.522
-2.2527	-55.073	-61.962	-61.955	-61.493	-62.029	-62.041	-62.096	-63.648	-63.838	-63.674	-63.727	-63.742
-2.2507	-55.352	-62.028	-62.04	-61.59	-62.086	-62.097	-62.541	-63.875	-64.007	-63.876	-63.944	-63.953
-2.2487	-55.626	-62.097	-62.125	-61.683	-62.148	-62.163	-62.783	-64.042	-64.127	-64.02	-64.115	-64.119
-2.2467	-55.987	-62.161	-62.221	-61.794	-62.204	-62.215	-62.979	-64.119	-64.192	-64.104	-64.212	-64.215
-2.2447	-56.329	-62.225	-62.318	-61.908	-62.259	-62.26	-63.084	-64.187	-64.231	-64.158	-64.282	-64.284
-2.2427	-56.71	-62.29	-62.416	-62.02	-62.314	-62.304	-63.116	-64.267	-64.253	-64.192	-64.348	-64.352
-2.2407	-56.822	-62.311	-62.456	-62.065	-62.332	-62.316	-62.998	-64.292	-64.243	-64.19	-64.372	-64.377
-2.2387	-56.655	-62.275	-62.424	-62.03	-62.302	-62.281	-62.799	-64.24	-64.186	-64.13	-64.326	-64.332
-2.2367	-56.369	-62.219	-62.366	-61.962	-62.254	-62.219	-62.847	-64.186	-64.156	-64.099	-64.273	-64.278
-2.2347	-56.02	-62.16	-62.278	-61.856	-62.197	-62.157	-63.02	-64.176	-64.176	-64.12	-64.263	-64.265
-2.2327	-55.367	-62.061	-62.139	-61.684	-62.106	-62.066	-63.222	-64.133	-64.21	-64.152	-64.217	-64.234
-2.2307	-54.44	-61.869	-61.908	-61.407	-61.925	-61.885	-63.424	-64.03	-64.225	-64.161	-64.11	-64.149
-2.2287	-53.658	-61.67	-61.696	-61.149	-61.733	-61.694	-63.578	-63.932	-64.221	-64.146	-63.999	-64.063
-2.2267	-53.097	-61.5	-61.526	-60.94	-61.566	-61.526	-63.595	-63.865	-64.204	-64.114	-63.91	-64.001
-2.2247	-52.643	-61.338	-61.378	-60.756	-61.4	-61.37	-63.354	-63.71	-64.114	-63.983	-63.752	-63.869
-2.2227	-52.318	-61.204	-61.273	-60.628	-61.267	-61.251	-62.892	-63.423	-63.92	-63.734	-63.475	-63.62
-2.2207	-52.135	-61.12	-61.211	-60.559	-61.184	-61.185	-62.289	-63.071	-63.658	-63.413	-63.181	-63.318
-2.2187	-52.339	-61.13	-61.248	-60.607	-61.192	-61.208	-61.761	-62.778	-63.408	-63.11	-62.949	-63.064
-2.2167	-52.874	-61.229	-61.374	-60.766	-61.286	-61.313	-61.316	-62.53	-63.188	-62.834	-62.758	-62.848
-2.2147	-53.718	-61.424	-61.585	-61.026	-61.471	-61.507	-61.075	-62.288	-63.004	-62.605	-62.572	-62.639
-2.2127	-54.921	-61.755	-61.908	-61.418	-61.801	-61.838	-61.065	-62.192	-62.926	-62.516	-62.501	-62.546
-2.2107	-56.113	-62.17	-62.288	-61.871	-62.216	-62.246	-61.274	-62.276	-62.967	-62.564	-62.586	-62.61
-2.2087	-57.477	-62.63	-62.707	-62.362	-62.67	-62.691	-61.741	-62.529	-63.119	-62.738	-62.796	-62.817
-2.2067	-58.354	-63.04	-63.041	-62.751	-63.081	-63.093	-62.232	-62.796	-63.328	-62.973	-63.026	-63.05
-2.2047	-58.584	-63.281	-63.188	-62.922	-63.331	-63.335	-62.627	-63.073	-63.535	-63.212	-63.252	-63.284
-2.2027	-58.182	-63.311	-63.141	-62.859	-63.375	-63.378	-62.93	-63.372	-63.717	-63.421	-63.504	-63.538
-2.2007	-57.413	-63.13	-62.911	-62.588	-63.203	-63.208	-63.139	-63.611	-63.864	-63.588	-63.718	-63.753
-2.1987	-56.781	-62.838	-62.617	-62.243	-62.913	-62.92	-63.264	-63.751	-63.982	-63.732	-63.858	-63.892
-2.1967	-56.201	-62.52	-62.33	-61.907	-62.595	-62.603	-63.253	-63.816	-64.033	-63.788	-63.925	-63.959
-2.1947	-56.004	-62.262	-62.135	-61.679	-62.332	-62.338	-63.171	-63.843	-64.022	-63.768	-63.96	-63.993
-2.1927	-56.216	-62.124	-62.061	-61.594	-62.186	-62.192	-63.14	-63.822	-63.972	-63.695	-63.966	-63.994
-2.1907	-56.943	-62.147	-62.144	-61.696	-62.195	-62.196	-63.091	-63.733	-63.901	-63.595	-63.918	-63.942
-2.1887	-57.713	-62.303	-62.353	-61.938	-62.343	-62.339	-62.993	-63.597	-63.786	-63.443	-63.814	-63.836
-2.1867	-57.972	-62.465	-62.529	-62.141	-62.507	-62.499	-62.861	-63.478	-63.635	-63.228	-63.707	-63.73
-2.1847	-57.956	-62.549	-62.598	-62.226	-62.598	-62.591	-62.642	-63.236	-63.443	-62.973	-63.478	-63.527
-2.1827	-57.864	-62.588	-62.633	-62.268	-62.643	-62.643	-62.366	-62.939	-63.226	-62.699	-63.14	-63.24
-2.1807	-57.66	-62.615	-62.669	-62.305	-62.676	-62.678	-62.131	-62.637	-63.071	-62.526	-62.801	-62.952
-2.1787	-57.275	-62.614	-62.671	-62.303	-62.682	-62.687	-61.929	-62.4	-62.978	-62.428	-62.51	-62.712
-2.1767	-56.852	-62.573	-62.602	-62.229	-62.643	-62.651	-61.793	-62.251	-62.943	-62.393	-62.304	-62.557
-2.1747	-56.99	-62.557	-62.574	-62.207	-62.619	-62.629	-61.701	-62.143	-62.95	-62.433	-62.139	-62.439
-2.1727	-57.198	-62.597	-62.611	-62.254	-62.652	-62.662	-61.804	-62.272	-63.09	-62.646	-62.2	-62.512
-2.1707	-57.425	-62.627	-62.626	-62.277	-62.674	-62.682	-62.078	-62.535	-63.334	-62.972	-62.437	-62.745
-2.1687	-57.586	-62.633	-62.604	-62.261	-62.677	-62.688	-62.392	-62.836	-63.566	-63.268	-62.691	-63.002
-2.1667	-57.494	-62.576	-62.507	-62.157	-62.62	-62.635	-62.836	-63.165	-63.803	-63.572	-62.97	-63.285
-2.1647	-57.196	-62.454	-62.379	-62.005	-62.501	-62.521	-63.187	-63.465	-64.022	-63.854	-63.227	-63.545
-2.1627	-56.631	-62.299	-62.238	-61.831	-62.351	-62.375	-63.296	-63.69	-64.152	-64.015	-63.418	-63.743
-2.1607	-56.19	-62.142	-62.099	-61.663	-62.199	-62.227	-63.105	-63.72	-64.119	-63.979	-63.456	-63.78
-2.1587	-55.914	-62.03	-62.009	-61.551	-62.094	-62.126	-62.715	-63.646	-63.986	-63.826	-63.44	-63.721
-2.1567	-56.002	-61.99	-62.013	-61.55	-62.057	-62.088	-62.222	-63.576	-63.804	-63.598	-63.44	-63.666
-2.1547	-56.296	-62.063	-62.126	-61.674	-62.129	-62.158	-61.526	-63.428	-63.536	-63.252	-63.37	-63.54
-2.1527	-57.056	-62.245	-62.34	-61.926	-62.307	-62.33	-60.888	-63.226	-63.237	-62.875	-63.246	-63.357
-2.1507	-57.691	-62.481	-62.566	-62.193	-62.542	-62.56	-60.535	-63.057	-63.026	-62.606	-63.149	-63.202
-2.1487	-57.937	-62.683	-62.734	-62.39	-62.745	-62.76	-60.391	-62.95	-62.917	-62.449	-63.098	-63.109
-2.1467	-57.83	-62.806	-62.812	-62.484	-62.863	-62.877	-60.336	-62.891	-62.847	-62.346	-63.042	-63.043
-2.1447	-57.353	-62.831	-62.787	-62.455	-62.879	-62.897	-60.3	-62.821	-62.843	-62.349	-62.96	-62.966
-2.1427	-56.94	-62.758	-62.689	-62.337	-62.797	-62.82	-60.37	-62.785	-62.928	-62.479	-62.887	-62.918
-2.1407	-56.293	-62.634	-62.545	-62.159	-62.666	-62.695	-60.471	-62.78	-63.018	-62.607	-62.846	-62.905
-2.1387	-55.851	-62.468	-62.378	-61.961	-62.491	-62.525	-60.626	-62.801	-63.103	-62.724	-62.828	-62.915
-2.1367	-55.864	-62.329	-62.268	-61.829	-62.34	-62.378	-60.879	-62.899	-63.193	-62.845	-62.864	-62.977
-2.1347	-56.157	-62.277	-62.259	-61.81	-62.281	-62.318	-61.214	-63.045	-63.319	-62.997	-62.951	-63.092
-2.1327	-56.427	-62.269	-62.281	-61.832	-62.28	-62.304	-61.596	-63.235	-63.446	-63.134	-63.103	-63.259
-2.1307	-56.562	-62.268	-62.307	-61.865	-62.287	-62.293	-61.936	-63.477	-63.557	-63.248	-63.353	-63.485
-2.1287	-56.652	-62.234	-62.298	-61.854	-62.262	-62.259	-62.28	-63.767	-63.723	-63.44	-63.65	-63.757
-2.1267	-56.813	-62.215	-62.316	-61.873	-62.25	-62.238	-62.461	-64.042	-63.877	-63.618	-63.937	-64.019
-2.1247	-56.983	-62.223	-62.362	-61.928	-62.265	-62.245	-62.532	-64.238	-64.001	-63.766	-64.16	-64.219
-2.1227	-56.954	-62.217	-62.375	-61.943	-62.267	-62.241	-62.52	-64.306	-64.065	-63.846	-64.261	-64.31
-2.1207	-57.03	-62.204	-62.368	-61.936	-62.255	-62.232	-62.494	-64.233	-64.063	-63.857	-64.209	-64.269
-2.1187	-57.482	-62.265	-62.426	-62.008	-62.311	-62.298	-62.549	-64.066	-64.03	-63.828	-64.016	-64.129
-2.1167	-58.018	-62.433	-62.59	-62.201	-62.473	-62.464	-62.597	-63.834	-63.957	-63.749	-63.76	-63.93
-2.1147	-58.109	-62.599	-62.712	-62.346	-62.64	-62.635	-62.683	-63.528	-63.865	-63.644	-63.448	-63.676
-2.1127	-57.893	-62.69	-62.747	-62.391	-62.73	-62.732	-62.731	-63.194	-63.761	-63.538	-63.101	-63.392
-2.1107	-57.661	-62.723	-62.747	-62.396	-62.759	-62.772	-62.833	-62.956	-63.699	-63.482	-62.828	-63.169
-2.1087	-57.283	-62.712	-62.725	-62.373	-62.746	-62.766	-62.863	-62.845	-63.684	-63.475	-62.695	-63.065
-2.1067	-56.237	-62.598	-62.591	-62.212	-62.638	-62.668	-62.729	-62.761	-63.656	-63.451	-62.616	-62.993
-2.1047	-55.014	-62.337	-62.312	-61.889	-62.385	-62.425	-62.579	-62.693	-63.625	-63.418	-62.542	-62.923
-2.1027	-54.225	-62.076	-62.08	-61.618	-62.123	-62.172	-62.463	-62.737	-63.605	-63.396	-62.517	-62.919
-2.1007	-53.501	-61.876	-61.905	-61.409	-61.929	-61.983	-62.435	-62.823	-63.598	-63.375	-62.529	-62.952
-2.0987	-52.914	-61.718	-61.751	-61.227	-61.781	-61.834	-62.362	-62.87	-63.555	-63.306	-62.567	-62.986
-2.0967	-52.692	-61.637	-61.674	-61.134	-61.701	-61.754	-62.403	-62.86	-63.48	-63.191	-62.524	-62.959
-2.0947	-53.184	-61.653	-61.711	-61.181	-61.709	-61.764	-62.621	-62.843	-63.434	-63.108	-62.459	-62.918
-2.0927	-54.159	-61.826	-61.912	-61.415	-61.871	-61.923	-62.827	-62.823	-63.395	-63.035	-62.396	-62.876
-2.0907	-55.235	-62.053	-62.142	-61.684	-62.087	-62.131	-63.01	-62.781	-63.383	-63.004	-62.38	-62.84
-2.0887	-56.574	-62.313	-62.416	-62.008	-62.324	-62.368	-63.18	-62.783	-63.409	-63.026	-62.433	-62.858
-2.0867	-57.866	-62.594	-62.705	-62.344	-62.581	-62.628	-63.398	-62.833	-63.502	-63.138	-62.493	-62.904
-2.0847	-59.094	-62.86	-62.977	-62.666	-62.831	-62.872	-63.554	-62.965	-63.625	-63.289	-62.658	-63.022
-2.0827	-60.005	-63.124	-63.234	-62.964	-63.083	-63.108	-63.612	-63.168	-63.739	-63.426	-62.953	-63.23
-2.0807	-60.342	-63.278	-63.357	-63.109	-63.232	-63.245	-63.667	-63.365	-63.828	-63.524	-63.267	-63.46
-2.0787	-60.235	-63.331	-63.373	-63.135	-63.288	-63.294	-63.667	-63.496	-63.853	-63.538	-63.491	-63.623
-2.0767	-59.821	-63.276	-63.28	-63.036	-63.252	-63.243	-63.602	-63.552	-63.824	-63.482	-63.623	-63.703
-2.0747	-59.52	-63.182	-63.19	-62.943	-63.176	-63.151	-63.48	-63.575	-63.727	-63.336	-63.706	-63.732
-2.0727	-58.755	-63.045	-63.044	-62.776	-63.059	-63.026	-63.407	-63.566	-63.649	-63.235	-63.739	-63.732
-2.0707	-57.839	-62.806	-62.795	-62.494	-62.843	-62.812	-63.443	-63.56	-63.636	-63.22	-63.733	-63.723
-2.0687	-57.236	-62.583	-62.597	-62.263	-62.634	-62.604	-63.544	-63.646	-63.72	-63.336	-63.784	-63.772
-2.0667	-56.936	-62.414	-62.476	-62.111	-62.476	-62.444	-63.729	-63.801	-63.883	-63.551	-63.907	-63.895
-2.0647	-56.638	-62.307	-62.409	-62.021	-62.373	-62.342	-63.929	-63.966	-64.047	-63.76	-64.05	-64.04
-2.0627	-56.074	-62.174	-62.271	-61.854	-62.242	-62.209	-64.119	-64.081	-64.208	-63.975	-64.171	-64.17
-2.0607	-55.987	-62.038	-62.161	-61.729	-62.105	-62.071	-64.218	-64.148	-64.321	-64.116	-64.25	-64.257
-2.0587	-56.167	-61.977	-62.148	-61.712	-62.042	-62	-64.058	-64.118	-64.313	-64.101	-64.236	-64.251
-2.0567	-56.328	-61.947	-62.138	-61.71	-62.014	-61.965	-63.748	-63.958	-64.168	-63.917	-64.096	-64.119
-2.0547	-56.584	-61.949	-62.133	-61.724	-62.013	-61.962	-63.41	-63.788	-63.983	-63.69	-63.933	-63.955
-2.0527	-57.074	-61.993	-62.18	-61.795	-62.05	-62.003	-63.101	-63.664	-63.84	-63.517	-63.803	-63.825
-2.0507	-57.766	-62.108	-62.325	-61.963	-62.151	-62.121	-62.777	-63.574	-63.714	-63.364	-63.68	-63.718
-2.0487	-58.471	-62.306	-62.524	-62.191	-62.325	-62.31	-62.505	-63.438	-63.597	-63.225	-63.514	-63.576
-2.0467	-59.134	-62.567	-62.752	-62.453	-62.559	-62.566	-62.542	-63.342	-63.567	-63.21	-63.39	-63.475
-2.0447	-59.7	-62.854	-63.008	-62.74	-62.822	-62.85	-62.72	-63.318	-63.65	-63.325	-63.353	-63.46
-2.0427	-60.07	-63.119	-63.244	-62.997	-63.067	-63.114	-62.75	-63.27	-63.712	-63.41	-63.306	-63.441
-2.0407	-60.425	-63.336	-63.421	-63.191	-63.269	-63.327	-62.692	-63.131	-63.717	-63.442	-63.183	-63.349
-2.0387	-60.68	-63.531	-63.546	-63.34	-63.472	-63.523	-62.663	-63.037	-63.736	-63.493	-63.125	-63.284
-2.0367	-60.541	-63.634	-63.576	-63.382	-63.596	-63.64	-62.598	-63.078	-63.774	-63.563	-63.194	-63.331
-2.0347	-60.107	-63.58	-63.463	-63.263	-63.57	-63.601	-62.394	-63.133	-63.774	-63.569	-63.274	-63.39
-2.0327	-59.834	-63.433	-63.289	-63.079	-63.44	-63.462	-62.165	-63.156	-63.71	-63.502	-63.314	-63.409
-2.0307	-59.537	-63.264	-63.116	-62.896	-63.285	-63.3	-62.195	-63.197	-63.684	-63.48	-63.361	-63.433
-2.0287	-59.115	-63.087	-62.945	-62.711	-63.118	-63.127	-62.335	-63.353	-63.719	-63.516	-63.508	-63.548
-2.0267	-58.836	-62.91	-62.809	-62.555	-62.936	-62.944	-62.457	-63.489	-63.746	-63.528	-63.636	-63.662
-2.0247	-58.85	-62.801	-62.753	-62.487	-62.815	-62.831	-62.546	-63.552	-63.753	-63.515	-63.698	-63.717
-2.0227	-59.037	-62.81	-62.807	-62.537	-62.808	-62.831	-62.547	-63.58	-63.748	-63.496	-63.698	-63.729
-2.0207	-58.972	-62.861	-62.873	-62.595	-62.858	-62.877	-62.424	-63.586	-63.724	-63.451	-63.633	-63.703
-2.0187	-58.913	-62.904	-62.909	-62.626	-62.904	-62.917	-62.089	-63.525	-63.621	-63.313	-63.494	-63.616
-2.0167	-58.75	-62.925	-62.919	-62.627	-62.932	-62.943	-61.665	-63.353	-63.425	-63.071	-63.254	-63.433
-2.0147	-58.404	-62.901	-62.868	-62.565	-62.918	-62.928	-61.24	-63.104	-63.204	-62.819	-62.938	-63.177
-2.0127	-57.98	-62.819	-62.771	-62.452	-62.845	-62.846	-60.955	-62.804	-62.996	-62.585	-62.559	-62.875
-2.0107	-57.684	-62.7	-62.651	-62.317	-62.736	-62.728	-60.754	-62.51	-62.815	-62.387	-62.219	-62.586
-2.0087	-57.56	-62.618	-62.578	-62.235	-62.657	-62.648	-60.675	-62.263	-62.692	-62.265	-62.009	-62.376
-2.0067	-57.388	-62.559	-62.521	-62.171	-62.6	-62.592	-60.679	-62.109	-62.652	-62.228	-61.917	-62.259
-2.0047	-57.336	-62.531	-62.496	-62.143	-62.571	-62.562	-60.76	-62.033	-62.693	-62.289	-61.893	-62.21
-2.0027	-57.355	-62.542	-62.52	-62.163	-62.581	-62.57	-61.014	-62.088	-62.814	-62.43	-61.957	-62.263
-2.0007	-57.179	-62.554	-62.527	-62.16	-62.599	-62.593	-61.25	-62.278	-62.975	-62.615	-62.166	-62.435
-1.9987	-56.695	-62.516	-62.477	-62.096	-62.569	-62.569	-61.605	-62.517	-63.172	-62.835	-62.448	-62.672
-1.9967	-56.144	-62.401	-62.36	-61.957	-62.46	-62.466	-62.046	-62.78	-63.388	-63.077	-62.71	-62.914
-1.9947	-55.721	-62.261	-62.244	-61.817	-62.319	-62.334	-62.547	-63.057	-63.624	-63.36	-62.972	-63.168
-1.9927	-55.288	-62.112	-62.121	-61.667	-62.17	-62.194	-62.988	-63.325	-63.847	-63.604	-63.234	-63.42
-1.9907	-54.979	-61.952	-61.99	-61.519	-62.013	-62.046	-63.162	-63.476	-63.967	-63.734	-63.45	-63.587
-1.9887	-55.107	-61.863	-61.93	-61.46	-61.917	-61.958	-63.171	-63.497	-63.999	-63.769	-63.557	-63.643
-1.9867	-55.675	-61.888	-61.98	-61.521	-61.928	-61.981	-63.036	-63.483	-63.962	-63.717	-63.584	-63.639
-1.9847	-56.245	-61.981	-62.073	-61.637	-62.011	-62.072	-62.699	-63.42	-63.834	-63.543	-63.562	-63.588
-1.9827	-56.677	-62.101	-62.162	-61.751	-62.13	-62.194	-62.193	-63.249	-63.613	-63.258	-63.413	-63.429
-1.9807	-56.917	-62.191	-62.212	-61.821	-62.221	-62.288	-61.691	-63.001	-63.358	-62.974	-63.15	-63.191
-1.9787	-57.053	-62.271	-62.253	-61.871	-62.293	-62.363	-61.373	-62.81	-63.144	-62.732	-62.887	-62.987
-1.9767	-56.986	-62.313	-62.275	-61.886	-62.329	-62.402	-61.12	-62.682	-62.954	-62.499	-62.666	-62.833
-1.9747	-56.739	-62.296	-62.25	-61.852	-62.308	-62.383	-60.778	-62.555	-62.772	-62.291	-62.451	-62.68
-1.9727	-56.541	-62.284	-62.247	-61.836	-62.298	-62.37	-60.577	-62.47	-62.673	-62.212	-62.27	-62.559
-1.9707	-56.368	-62.259	-62.244	-61.818	-62.273	-62.345	-60.633	-62.494	-62.668	-62.232	-62.245	-62.554
-1.9687	-56.459	-62.279	-62.293	-61.856	-62.29	-62.362	-60.755	-62.586	-62.714	-62.26	-62.349	-62.642
-1.9667	-56.414	-62.296	-62.321	-61.876	-62.312	-62.384	-60.759	-62.624	-62.745	-62.278	-62.435	-62.701
-1.9647	-55.978	-62.255	-62.268	-61.812	-62.285	-62.352	-60.74	-62.633	-62.791	-62.343	-62.492	-62.732
-1.9627	-55.346	-62.153	-62.148	-61.669	-62.205	-62.263	-60.901	-62.648	-62.857	-62.43	-62.562	-62.776
-1.9607	-54.552	-61.973	-61.953	-61.444	-62.04	-62.094	-61.083	-62.654	-62.916	-62.487	-62.63	-62.818
-1.9587	-53.875	-61.778	-61.758	-61.22	-61.856	-61.906	-61.15	-62.632	-62.952	-62.524	-62.643	-62.825
-1.9567	-53.217	-61.579	-61.584	-61.022	-61.673	-61.718	-61.249	-62.691	-63.02	-62.633	-62.712	-62.873
-1.9547	-52.719	-61.408	-61.445	-60.863	-61.515	-61.554	-61.434	-62.854	-63.151	-62.814	-62.854	-63.006
-1.9527	-52.823	-61.32	-61.401	-60.816	-61.431	-61.467	-61.816	-63.045	-63.326	-63.029	-63.02	-63.168
-1.9507	-53.073	-61.319	-61.436	-60.86	-61.424	-61.465	-62.073	-63.238	-63.501	-63.233	-63.185	-63.335
-1.9487	-53.617	-61.383	-61.523	-60.975	-61.476	-61.525	-62.246	-63.379	-63.634	-63.393	-63.268	-63.445
-1.9467	-54.182	-61.493	-61.633	-61.119	-61.569	-61.629	-62.369	-63.466	-63.73	-63.512	-63.301	-63.507
-1.9447	-54.587	-61.619	-61.709	-61.23	-61.671	-61.741	-62.432	-63.44	-63.763	-63.553	-63.225	-63.476
-1.9427	-54.894	-61.728	-61.766	-61.319	-61.759	-61.836	-62.567	-63.417	-63.796	-63.603	-63.181	-63.448
-1.9407	-54.95	-61.793	-61.781	-61.354	-61.804	-61.885	-62.639	-63.459	-63.83	-63.642	-63.212	-63.486
-1.9387	-55.096	-61.848	-61.799	-61.388	-61.848	-61.924	-62.921	-63.546	-63.903	-63.719	-63.302	-63.567
-1.9367	-55.075	-61.924	-61.843	-61.433	-61.925	-61.986	-63.256	-63.726	-64.011	-63.827	-63.543	-63.75
-1.9347	-55.19	-62.017	-61.915	-61.505	-62.025	-62.069	-63.617	-63.972	-64.136	-63.943	-63.847	-63.996
-1.9327	-55.517	-62.133	-62.029	-61.622	-62.151	-62.177	-63.91	-64.249	-64.25	-64.039	-64.174	-64.265
-1.9307	-55.847	-62.251	-62.142	-61.737	-62.283	-62.297	-64.074	-64.444	-64.291	-64.03	-64.407	-64.46
-1.9287	-56.16	-62.354	-62.235	-61.834	-62.401	-62.404	-64.136	-64.529	-64.255	-63.941	-64.52	-64.545
-1.9267	-56.442	-62.426	-62.306	-61.905	-62.482	-62.479	-64.02	-64.524	-64.156	-63.786	-64.54	-64.545
-1.9247	-56.589	-62.432	-62.309	-61.906	-62.496	-62.492	-63.79	-64.425	-64.012	-63.588	-64.441	-64.454
-1.9227	-56.225	-62.327	-62.201	-61.779	-62.4	-62.399	-63.464	-64.227	-63.841	-63.376	-64.259	-64.281
-1.9207	-55.655	-62.123	-62.026	-61.567	-62.204	-62.205	-63.112	-63.98	-63.67	-63.168	-64.034	-64.066
-1.9187	-55.272	-61.929	-61.885	-61.393	-62.007	-62.009	-62.715	-63.686	-63.479	-62.935	-63.774	-63.815
-1.9167	-55.036	-61.806	-61.814	-61.298	-61.877	-61.888	-62.323	-63.364	-63.313	-62.745	-63.506	-63.55
-1.9147	-54.619	-61.714	-61.752	-61.213	-61.774	-61.794	-61.951	-63.027	-63.168	-62.589	-63.231	-63.279
-1.9127	-54.238	-61.628	-61.693	-61.136	-61.671	-61.703	-61.675	-62.717	-63.058	-62.484	-62.976	-63.026
-1.9107	-54.292	-61.608	-61.708	-61.15	-61.625	-61.671	-61.541	-62.515	-62.994	-62.426	-62.801	-62.851
-1.9087	-54.382	-61.658	-61.762	-61.22	-61.648	-61.711	-61.626	-62.378	-62.976	-62.431	-62.694	-62.746
-1.9067	-54.247	-61.683	-61.774	-61.24	-61.654	-61.733	-61.839	-62.364	-63.07	-62.592	-62.691	-62.742
-1.9047	-53.706	-61.618	-61.694	-61.153	-61.588	-61.671	-62.089	-62.49	-63.217	-62.816	-62.798	-62.848
-1.9027	-53.192	-61.459	-61.529	-60.974	-61.437	-61.525	-62.292	-62.736	-63.38	-63.053	-63.006	-63.049
-1.9007	-52.734	-61.288	-61.373	-60.8	-61.281	-61.365	-62.44	-62.975	-63.519	-63.252	-63.219	-63.255
-1.8987	-51.988	-61.086	-61.18	-60.574	-61.105	-61.178	-62.558	-63.165	-63.64	-63.427	-63.395	-63.423
-1.8967	-51.321	-60.853	-60.973	-60.323	-60.904	-60.962	-62.513	-63.356	-63.745	-63.573	-63.553	-63.571
-1.8947	-50.787	-60.642	-60.794	-60.104	-60.721	-60.764	-62.423	-63.522	-63.804	-63.648	-63.687	-63.695
-1.8927	-50.835	-60.514	-60.694	-59.982	-60.603	-60.637	-62.374	-63.632	-63.845	-63.692	-63.78	-63.78
-1.8907	-51.379	-60.565	-60.781	-60.074	-60.655	-60.681	-62.503	-63.714	-63.91	-63.765	-63.846	-63.836
-1.8887	-52.39	-60.785	-61.004	-60.335	-60.872	-60.895	-62.791	-63.889	-64.05	-63.922	-63.983	-63.958
-1.8867	-53.874	-61.186	-61.384	-60.784	-61.259	-61.281	-63.024	-64.113	-64.215	-64.109	-64.172	-64.139
-1.8847	-55.31	-61.688	-61.818	-61.301	-61.748	-61.771	-63.281	-64.32	-64.369	-64.292	-64.35	-64.32
-1.8827	-56.673	-62.212	-62.249	-61.824	-62.26	-62.283	-63.58	-64.476	-64.504	-64.455	-64.451	-64.448
-1.8807	-57.344	-62.667	-62.585	-62.239	-62.712	-62.736	-63.791	-64.578	-64.573	-64.524	-64.494	-64.525
-1.8787	-57.455	-62.946	-62.744	-62.445	-62.993	-63.017	-63.779	-64.573	-64.545	-64.479	-64.408	-64.507
-1.8767	-57.075	-63.034	-62.741	-62.449	-63.085	-63.109	-63.554	-64.44	-64.408	-64.311	-64.2	-64.378
-1.8747	-56.34	-62.929	-62.577	-62.26	-62.989	-63.013	-63.378	-64.185	-64.207	-64.075	-63.859	-64.128
-1.8727	-55.568	-62.7	-62.337	-61.985	-62.765	-62.792	-63.191	-63.864	-63.978	-63.8	-63.462	-63.811
-1.8707	-54.977	-62.44	-62.108	-61.711	-62.51	-62.538	-62.896	-63.564	-63.744	-63.511	-63.143	-63.526
-1.8687	-54.973	-62.255	-62.003	-61.563	-62.322	-62.35	-62.601	-63.311	-63.583	-63.344	-62.883	-63.288
-1.8667	-54.975	-62.142	-61.937	-61.467	-62.207	-62.239	-62.451	-63.177	-63.504	-63.277	-62.8	-63.171
-1.8647	-55.092	-62.062	-61.896	-61.415	-62.118	-62.156	-62.486	-63.132	-63.491	-63.275	-62.804	-63.145
-1.8627	-55.381	-62.049	-61.922	-61.452	-62.093	-62.137	-62.512	-63.185	-63.52	-63.304	-62.909	-63.204
-1.8607	-55.815	-62.119	-62.017	-61.566	-62.151	-62.2	-62.567	-63.283	-63.558	-63.333	-63.08	-63.322
-1.8587	-55.927	-62.202	-62.089	-61.656	-62.227	-62.283	-62.69	-63.363	-63.575	-63.332	-63.201	-63.419
-1.8567	-55.785	-62.212	-62.067	-61.647	-62.232	-62.294	-62.871	-63.396	-63.525	-63.223	-63.269	-63.469
-1.8547	-55.767	-62.207	-62.078	-61.666	-62.225	-62.287	-63.018	-63.379	-63.466	-63.093	-63.255	-63.462
-1.8527	-55.616	-62.227	-62.101	-61.697	-62.253	-62.309	-63	-63.334	-63.395	-62.956	-63.222	-63.418
-1.8507	-55.05	-62.169	-62.037	-61.61	-62.201	-62.255	-62.916	-63.285	-63.302	-62.811	-63.2	-63.372
-1.8487	-54.279	-61.985	-61.868	-61.405	-62.02	-62.069	-62.803	-63.273	-63.238	-62.724	-63.157	-63.331
-1.8467	-53.819	-61.748	-61.694	-61.196	-61.778	-61.825	-62.644	-63.301	-63.236	-62.724	-63.157	-63.327
-1.8447	-53.422	-61.553	-61.569	-61.037	-61.576	-61.622	-62.419	-63.377	-63.283	-62.796	-63.212	-63.374
-1.8427	-53.084	-61.376	-61.436	-60.874	-61.39	-61.438	-62.148	-63.431	-63.293	-62.831	-63.25	-63.405
-1.8407	-52.865	-61.204	-61.311	-60.709	-61.205	-61.256	-62.041	-63.477	-63.316	-62.888	-63.274	-63.44
-1.8387	-53.172	-61.146	-61.298	-60.686	-61.14	-61.191	-62.059	-63.511	-63.38	-62.987	-63.266	-63.467
-1.8367	-53.727	-61.258	-61.412	-60.814	-61.255	-61.308	-62.116	-63.495	-63.449	-63.082	-63.294	-63.493
-1.8347	-54.019	-61.441	-61.533	-60.953	-61.451	-61.497	-62.224	-63.436	-63.475	-63.133	-63.281	-63.481
-1.8327	-54.265	-61.595	-61.616	-61.055	-61.618	-61.657	-62.375	-63.364	-63.503	-63.193	-63.249	-63.451
-1.8307	-54.613	-61.752	-61.723	-61.189	-61.786	-61.817	-62.581	-63.335	-63.57	-63.297	-63.252	-63.457
-1.8287	-55.02	-61.92	-61.84	-61.35	-61.966	-61.99	-62.717	-63.307	-63.635	-63.399	-63.275	-63.47
-1.8267	-55.218	-62.035	-61.908	-61.451	-62.089	-62.108	-62.793	-63.267	-63.697	-63.504	-63.343	-63.492
-1.8247	-55.171	-62.043	-61.902	-61.455	-62.106	-62.121	-62.872	-63.286	-63.757	-63.601	-63.379	-63.519
-1.8227	-55.248	-62.018	-61.91	-61.471	-62.085	-62.101	-62.98	-63.358	-63.859	-63.73	-63.445	-63.585
-1.8207	-55.284	-61.984	-61.912	-61.471	-62.058	-62.074	-63.125	-63.414	-63.956	-63.841	-63.513	-63.652
-1.8187	-55.112	-61.9	-61.857	-61.4	-61.985	-62.002	-63.28	-63.409	-64.035	-63.934	-63.539	-63.678
-1.8167	-54.771	-61.765	-61.765	-61.274	-61.861	-61.879	-63.395	-63.388	-64.071	-63.981	-63.526	-63.671
-1.8147	-54.225	-61.583	-61.624	-61.093	-61.69	-61.708	-63.499	-63.413	-64.083	-64	-63.496	-63.667
-1.8127	-53.553	-61.363	-61.426	-60.852	-61.476	-61.492	-63.591	-63.432	-64.098	-64.019	-63.503	-63.682
-1.8107	-52.931	-61.112	-61.187	-60.569	-61.228	-61.247	-63.639	-63.385	-64.064	-63.977	-63.473	-63.653
-1.8087	-52.57	-60.927	-61.022	-60.384	-61.038	-61.058	-63.664	-63.335	-63.998	-63.886	-63.405	-63.597
-1.8067	-52.208	-60.813	-60.907	-60.264	-60.92	-60.941	-63.624	-63.285	-63.89	-63.734	-63.293	-63.516
-1.8047	-51.816	-60.74	-60.812	-60.168	-60.841	-60.864	-63.581	-63.24	-63.796	-63.573	-63.184	-63.44
-1.8027	-51.512	-60.701	-60.749	-60.106	-60.798	-60.826	-63.526	-63.152	-63.695	-63.391	-63.053	-63.342
-1.8007	-51.768	-60.747	-60.802	-60.183	-60.839	-60.867	-63.436	-63.032	-63.579	-63.198	-62.927	-63.228
-1.7987	-52.139	-60.897	-60.96	-60.376	-60.984	-61.011	-63.32	-62.939	-63.479	-63.033	-62.829	-63.14
-1.7967	-52.335	-61.043	-61.094	-60.526	-61.132	-61.158	-63.185	-62.823	-63.401	-62.911	-62.724	-63.044
-1.7947	-52.979	-61.223	-61.29	-60.746	-61.306	-61.33	-63.03	-62.744	-63.362	-62.845	-62.686	-62.995
-1.7927	-54.104	-61.505	-61.604	-61.101	-61.579	-61.6	-62.8	-62.601	-63.294	-62.762	-62.602	-62.906
-1.7907	-55.502	-61.894	-62.006	-61.562	-61.957	-61.974	-62.45	-62.347	-63.177	-62.628	-62.427	-62.726
-1.7887	-56.314	-62.276	-62.341	-61.944	-62.337	-62.353	-61.969	-62.006	-62.968	-62.381	-62.125	-62.443
-1.7867	-56.805	-62.54	-62.531	-62.167	-62.598	-62.616	-61.406	-61.623	-62.712	-62.078	-61.762	-62.097
-1.7847	-57.242	-62.719	-62.667	-62.333	-62.768	-62.792	-60.814	-61.279	-62.449	-61.771	-61.422	-61.774
-1.7827	-57.284	-62.804	-62.71	-62.387	-62.847	-62.879	-60.365	-60.977	-62.236	-61.536	-61.103	-61.471
-1.7807	-56.97	-62.766	-62.631	-62.304	-62.807	-62.848	-60.088	-60.844	-62.114	-61.401	-60.93	-61.3
-1.7787	-56.537	-62.643	-62.505	-62.157	-62.68	-62.729	-60.076	-60.916	-62.102	-61.399	-60.907	-61.294
-1.7767	-56.542	-62.534	-62.436	-62.075	-62.561	-62.615	-60.374	-61.13	-62.255	-61.612	-61.014	-61.424
-1.7747	-56.99	-62.554	-62.523	-62.17	-62.566	-62.623	-60.932	-61.507	-62.535	-61.982	-61.27	-61.708
-1.7727	-57.431	-62.684	-62.679	-62.347	-62.697	-62.747	-61.596	-61.949	-62.87	-62.404	-61.622	-62.067
-1.7707	-57.772	-62.838	-62.825	-62.515	-62.855	-62.898	-62.201	-62.407	-63.167	-62.765	-62.038	-62.469
-1.7687	-57.849	-62.969	-62.931	-62.636	-62.993	-63.03	-62.717	-62.797	-63.416	-63.087	-62.39	-62.825
-1.7667	-57.663	-63.014	-62.932	-62.645	-63.044	-63.078	-62.971	-63.06	-63.569	-63.29	-62.645	-63.072
-1.7647	-57.291	-62.962	-62.845	-62.554	-62.994	-63.027	-63.034	-63.25	-63.622	-63.358	-62.856	-63.255
-1.7627	-56.522	-62.784	-62.641	-62.317	-62.823	-62.856	-62.944	-63.331	-63.607	-63.332	-62.978	-63.344
-1.7607	-56.004	-62.539	-62.411	-62.05	-62.574	-62.611	-62.673	-63.34	-63.534	-63.239	-63.021	-63.368
-1.7587	-55.489	-62.32	-62.216	-61.826	-62.35	-62.392	-62.326	-63.239	-63.438	-63.135	-62.93	-63.287
-1.7567	-55.249	-62.124	-62.045	-61.632	-62.146	-62.192	-62.029	-63.09	-63.357	-63.033	-62.811	-63.159
-1.7547	-55.288	-62.013	-61.964	-61.543	-62.029	-62.075	-61.983	-63.022	-63.368	-63.052	-62.803	-63.116
-1.7527	-55.312	-61.989	-61.948	-61.53	-62.005	-62.052	-61.991	-63.02	-63.415	-63.107	-62.844	-63.134
-1.7507	-55.385	-62.037	-61.981	-61.58	-62.053	-62.101	-62.019	-63.015	-63.457	-63.16	-62.897	-63.162
-1.7487	-55.044	-62.062	-61.95	-61.56	-62.085	-62.135	-62.215	-62.962	-63.497	-63.204	-62.942	-63.164
-1.7467	-54.858	-62.014	-61.871	-61.48	-62.043	-62.096	-62.398	-62.971	-63.539	-63.245	-63.045	-63.21
-1.7447	-54.719	-61.97	-61.822	-61.43	-62.007	-62.061	-62.433	-63.002	-63.544	-63.244	-63.154	-63.27
-1.7427	-54.399	-61.901	-61.751	-61.348	-61.947	-61.999	-62.334	-63.001	-63.499	-63.173	-63.192	-63.284
-1.7407	-53.966	-61.78	-61.632	-61.199	-61.84	-61.887	-62.175	-62.951	-63.454	-63.108	-63.194	-63.262
-1.7387	-53.681	-61.616	-61.484	-61.017	-61.688	-61.729	-61.951	-62.882	-63.391	-63.028	-63.16	-63.209
-1.7367	-53.778	-61.504	-61.425	-60.928	-61.581	-61.614	-61.699	-62.903	-63.357	-62.991	-63.167	-63.207
-1.7347	-53.939	-61.49	-61.453	-60.937	-61.568	-61.595	-61.612	-62.93	-63.351	-62.982	-63.185	-63.222
-1.7327	-54.123	-61.528	-61.514	-60.987	-61.598	-61.623	-61.795	-62.988	-63.389	-63.015	-63.234	-63.269
-1.7307	-54.607	-61.625	-61.62	-61.097	-61.682	-61.713	-61.968	-63.041	-63.434	-63.061	-63.265	-63.316
-1.7287	-55.383	-61.815	-61.824	-61.331	-61.853	-61.891	-62.182	-63.104	-63.469	-63.114	-63.276	-63.349
-1.7267	-56.066	-62.069	-62.072	-61.62	-62.09	-62.135	-62.44	-63.206	-63.518	-63.168	-63.313	-63.414
-1.7247	-56.538	-62.312	-62.287	-61.883	-62.32	-62.369	-62.594	-63.188	-63.504	-63.144	-63.226	-63.377
-1.7227	-56.974	-62.526	-62.476	-62.119	-62.52	-62.573	-62.537	-63.06	-63.433	-63.055	-63.044	-63.24
-1.7207	-57.243	-62.712	-62.63	-62.312	-62.708	-62.755	-62.26	-62.812	-63.309	-62.931	-62.752	-63
-1.7187	-57.347	-62.852	-62.755	-62.46	-62.854	-62.889	-61.861	-62.498	-63.147	-62.758	-62.425	-62.704
-1.7167	-57.384	-62.93	-62.824	-62.538	-62.938	-62.96	-61.353	-62.152	-62.96	-62.534	-62.096	-62.393
-1.7147	-57.509	-62.974	-62.873	-62.591	-62.986	-62.995	-60.786	-61.78	-62.769	-62.325	-61.737	-62.06
-1.7127	-57.862	-63.028	-62.943	-62.665	-63.044	-63.045	-60.199	-61.518	-62.612	-62.154	-61.499	-61.825
-1.7107	-58.132	-63.077	-62.993	-62.714	-63.103	-63.096	-59.677	-61.373	-62.47	-61.996	-61.352	-61.689
-1.7087	-58.46	-63.102	-63.023	-62.742	-63.128	-63.12	-59.23	-61.337	-62.337	-61.811	-61.305	-61.638
-1.7067	-58.655	-63.108	-63.017	-62.736	-63.134	-63.132	-59.105	-61.379	-62.237	-61.653	-61.359	-61.669
-1.7047	-58.652	-63.071	-62.959	-62.674	-63.097	-63.107	-59.076	-61.436	-62.173	-61.541	-61.43	-61.723
-1.7027	-58.535	-63.002	-62.874	-62.579	-63.024	-63.047	-59.165	-61.511	-62.12	-61.437	-61.555	-61.799
-1.7007	-57.874	-62.855	-62.708	-62.385	-62.881	-62.916	-59.413	-61.635	-62.144	-61.444	-61.728	-61.921
-1.6987	-56.963	-62.609	-62.458	-62.093	-62.641	-62.687	-59.793	-61.791	-62.265	-61.569	-61.928	-62.078
-1.6967	-56.049	-62.302	-62.177	-61.764	-62.339	-62.393	-60.17	-61.944	-62.44	-61.798	-62.101	-62.235
-1.6947	-55.209	-61.983	-61.914	-61.453	-62.021	-62.075	-60.424	-62.092	-62.657	-62.102	-62.244	-62.379
-1.6927	-54.319	-61.681	-61.677	-61.159	-61.732	-61.776	-60.844	-62.309	-62.902	-62.441	-62.438	-62.574
-1.6907	-53.52	-61.39	-61.439	-60.883	-61.455	-61.485	-61.297	-62.565	-63.183	-62.815	-62.652	-62.809
-1.6887	-53.153	-61.163	-61.272	-60.689	-61.233	-61.247	-61.785	-62.742	-63.422	-63.122	-62.799	-62.988
-1.6867	-53.271	-61.065	-61.23	-60.647	-61.134	-61.133	-62.212	-62.867	-63.592	-63.341	-62.922	-63.122
-1.6847	-53.403	-61.1	-61.282	-60.716	-61.169	-61.153	-62.656	-63.013	-63.739	-63.515	-63.109	-63.284
-1.6827	-53.59	-61.193	-61.352	-60.811	-61.265	-61.243	-63.062	-63.132	-63.856	-63.638	-63.273	-63.431
-1.6807	-53.99	-61.344	-61.473	-60.968	-61.411	-61.387	-63.299	-63.146	-63.921	-63.705	-63.304	-63.475
-1.6787	-54.145	-61.482	-61.564	-61.073	-61.548	-61.526	-63.418	-63.017	-63.907	-63.69	-63.161	-63.381
-1.6767	-54.273	-61.587	-61.622	-61.149	-61.652	-61.63	-63.326	-62.844	-63.814	-63.575	-62.939	-63.21
-1.6747	-54.099	-61.627	-61.617	-61.138	-61.693	-61.673	-63.073	-62.688	-63.698	-63.45	-62.702	-63.033
-1.6727	-53.898	-61.59	-61.554	-61.056	-61.66	-61.648	-62.728	-62.502	-63.57	-63.309	-62.418	-62.824
-1.6707	-53.553	-61.519	-61.468	-60.945	-61.592	-61.585	-62.37	-62.394	-63.437	-63.165	-62.189	-62.656
-1.6687	-52.93	-61.367	-61.295	-60.736	-61.447	-61.445	-61.952	-62.384	-63.309	-63.032	-62.123	-62.595
-1.6667	-52.646	-61.239	-61.183	-60.601	-61.318	-61.32	-61.452	-62.496	-63.202	-62.916	-62.226	-62.65
-1.6647	-52.534	-61.19	-61.154	-60.55	-61.268	-61.28	-61.049	-62.632	-63.148	-62.874	-62.393	-62.759
-1.6627	-52.383	-61.207	-61.168	-60.563	-61.288	-61.309	-60.957	-62.751	-63.144	-62.885	-62.562	-62.871
-1.6607	-52.295	-61.24	-61.187	-60.587	-61.322	-61.347	-60.96	-62.848	-63.143	-62.888	-62.716	-62.968
-1.6587	-52.396	-61.297	-61.244	-60.655	-61.378	-61.406	-60.919	-62.845	-63.111	-62.852	-62.789	-62.992
-1.6567	-53.02	-61.437	-61.416	-60.857	-61.51	-61.538	-60.878	-62.758	-63.078	-62.8	-62.755	-62.931
-1.6547	-53.535	-61.634	-61.616	-61.095	-61.703	-61.731	-60.961	-62.636	-63.059	-62.768	-62.7	-62.845
-1.6527	-53.695	-61.767	-61.724	-61.232	-61.838	-61.862	-61.059	-62.583	-63.057	-62.751	-62.693	-62.807
-1.6507	-54.198	-61.841	-61.809	-61.332	-61.907	-61.929	-60.987	-62.554	-63.037	-62.715	-62.702	-62.786
-1.6487	-54.789	-61.93	-61.925	-61.461	-61.985	-62.009	-60.96	-62.608	-63.065	-62.757	-62.772	-62.828
-1.6467	-55.34	-61.987	-61.996	-61.543	-62.036	-62.062	-60.933	-62.748	-63.151	-62.864	-62.926	-62.959
-1.6447	-55.651	-62.016	-62.017	-61.563	-62.061	-62.095	-60.969	-62.918	-63.238	-62.982	-63.108	-63.119
-1.6427	-56.084	-62.02	-62.029	-61.575	-62.06	-62.102	-61.037	-63.102	-63.335	-63.099	-63.263	-63.277
-1.6407	-56.617	-62.067	-62.097	-61.649	-62.101	-62.15	-61.098	-63.227	-63.409	-63.177	-63.355	-63.386
-1.6387	-56.784	-62.124	-62.151	-61.709	-62.155	-62.211	-61.153	-63.284	-63.448	-63.201	-63.366	-63.431
-1.6367	-56.675	-62.133	-62.145	-61.706	-62.177	-62.232	-61.1	-63.242	-63.408	-63.123	-63.291	-63.389
-1.6347	-56.396	-62.113	-62.111	-61.671	-62.156	-62.216	-61.156	-63.139	-63.323	-62.998	-63.154	-63.282
-1.6327	-55.932	-62.027	-62.015	-61.557	-62.067	-62.134	-61.326	-63.068	-63.255	-62.886	-63.01	-63.184
-1.6307	-55.118	-61.838	-61.808	-61.313	-61.876	-61.95	-61.547	-63.028	-63.21	-62.817	-62.892	-63.117
-1.6287	-54.378	-61.564	-61.542	-61.005	-61.597	-61.677	-61.865	-63.035	-63.233	-62.848	-62.846	-63.104
-1.6267	-54.028	-61.326	-61.343	-60.773	-61.349	-61.435	-62.227	-63.092	-63.32	-62.967	-62.914	-63.171
-1.6247	-53.941	-61.188	-61.245	-60.651	-61.191	-61.285	-62.552	-63.122	-63.437	-63.123	-62.984	-63.243
-1.6227	-53.786	-61.14	-61.216	-60.603	-61.144	-61.231	-62.705	-63.096	-63.526	-63.249	-63	-63.266
-1.6207	-53.769	-61.168	-61.256	-60.65	-61.182	-61.254	-62.746	-63.021	-63.607	-63.373	-63.025	-63.262
-1.6187	-54.111	-61.308	-61.414	-60.833	-61.332	-61.392	-62.643	-62.896	-63.658	-63.445	-63.038	-63.232
-1.6167	-54.459	-61.534	-61.626	-61.076	-61.567	-61.619	-62.33	-62.724	-63.619	-63.405	-62.982	-63.14
-1.6147	-54.405	-61.712	-61.757	-61.226	-61.758	-61.805	-61.968	-62.597	-63.532	-63.305	-62.897	-63.033
-1.6127	-54.294	-61.788	-61.79	-61.27	-61.847	-61.892	-61.774	-62.63	-63.478	-63.245	-62.911	-63.024
-1.6107	-54.562	-61.832	-61.831	-61.326	-61.892	-61.94	-61.874	-62.812	-63.531	-63.303	-63.072	-63.154
-1.6087	-54.79	-61.874	-61.867	-61.369	-61.927	-61.984	-62.004	-63.066	-63.626	-63.406	-63.266	-63.346
-1.6067	-54.658	-61.849	-61.824	-61.318	-61.899	-61.963	-62.127	-63.311	-63.704	-63.498	-63.405	-63.512
-1.6047	-54.583	-61.767	-61.749	-61.236	-61.819	-61.882	-62.386	-63.538	-63.774	-63.569	-63.535	-63.669
-1.6027	-54.928	-61.741	-61.763	-61.256	-61.798	-61.854	-62.542	-63.658	-63.817	-63.602	-63.563	-63.746
-1.6007	-55.273	-61.807	-61.868	-61.375	-61.869	-61.919	-62.483	-63.616	-63.774	-63.53	-63.458	-63.692
-1.5987	-55.507	-61.881	-61.945	-61.468	-61.954	-61.998	-62.2	-63.44	-63.619	-63.318	-63.214	-63.504
-1.5967	-55.707	-61.926	-61.99	-61.527	-62.014	-62.052	-61.879	-63.162	-63.352	-62.959	-62.868	-63.21
-1.5947	-56.226	-62.003	-62.079	-61.639	-62.098	-62.129	-61.704	-62.916	-63.088	-62.604	-62.574	-62.939
-1.5927	-56.534	-62.099	-62.167	-61.749	-62.203	-62.231	-61.546	-62.687	-62.9	-62.352	-62.268	-62.681
-1.5907	-56.238	-62.1	-62.121	-61.706	-62.214	-62.244	-61.545	-62.489	-62.751	-62.148	-62.001	-62.457
-1.5887	-55.574	-61.938	-61.905	-61.471	-62.062	-62.092	-61.678	-62.302	-62.656	-62.017	-61.728	-62.248
-1.5867	-54.704	-61.666	-61.631	-61.158	-61.796	-61.826	-61.743	-62.145	-62.608	-61.96	-61.514	-62.086
-1.5847	-53.857	-61.384	-61.374	-60.857	-61.512	-61.537	-61.709	-62.016	-62.626	-62.009	-61.376	-61.974
-1.5827	-52.712	-61.07	-61.077	-60.51	-61.201	-61.22	-61.466	-61.851	-62.643	-62.063	-61.224	-61.843
-1.5807	-51.572	-60.734	-60.773	-60.146	-60.853	-60.869	-61.173	-61.701	-62.635	-62.088	-61.163	-61.745
-1.5787	-50.714	-60.422	-60.528	-59.844	-60.527	-60.538	-60.881	-61.628	-62.657	-62.151	-61.248	-61.741
-1.5767	-50.388	-60.228	-60.418	-59.699	-60.315	-60.324	-60.612	-61.685	-62.708	-62.237	-61.501	-61.862
-1.5747	-50.296	-60.176	-60.413	-59.679	-60.247	-60.255	-60.519	-61.806	-62.77	-62.316	-61.79	-62.027
-1.5727	-50.309	-60.176	-60.431	-59.69	-60.234	-60.247	-60.631	-62.016	-62.878	-62.449	-62.123	-62.261
-1.5707	-50.675	-60.253	-60.523	-59.794	-60.296	-60.315	-61.046	-62.305	-63.071	-62.681	-62.519	-62.576
-1.5687	-50.984	-60.379	-60.633	-59.922	-60.423	-60.443	-61.472	-62.613	-63.286	-62.927	-62.893	-62.906
-1.5667	-51.386	-60.549	-60.757	-60.077	-60.596	-60.617	-61.757	-62.887	-63.447	-63.113	-63.161	-63.171
-1.5647	-51.395	-60.704	-60.842	-60.179	-60.759	-60.778	-61.924	-63.046	-63.568	-63.263	-63.275	-63.326
-1.5627	-51.216	-60.751	-60.815	-60.158	-60.812	-60.834	-61.986	-63.115	-63.666	-63.404	-63.312	-63.402
-1.5607	-50.961	-60.741	-60.764	-60.109	-60.807	-60.835	-61.893	-63.115	-63.708	-63.469	-63.283	-63.41
-1.5587	-50.537	-60.657	-60.661	-59.981	-60.731	-60.769	-61.552	-63.055	-63.649	-63.415	-63.155	-63.332
-1.5567	-50.698	-60.58	-60.614	-59.922	-60.643	-60.697	-61.233	-62.938	-63.545	-63.316	-62.963	-63.192
-1.5547	-51.089	-60.557	-60.643	-59.946	-60.607	-60.674	-61.123	-62.763	-63.466	-63.238	-62.755	-63.023
-1.5527	-52.052	-60.624	-60.777	-60.096	-60.655	-60.735	-61.147	-62.663	-63.383	-63.131	-62.652	-62.917
-1.5507	-53.363	-60.862	-61.087	-60.45	-60.874	-60.96	-61.214	-62.636	-63.311	-63.028	-62.615	-62.879
-1.5487	-54.734	-61.216	-61.462	-60.882	-61.207	-61.295	-61.303	-62.565	-63.236	-62.924	-62.532	-62.813
-1.5467	-56.125	-61.643	-61.877	-61.371	-61.614	-61.699	-61.372	-62.456	-63.159	-62.814	-62.461	-62.728
-1.5447	-56.935	-62.052	-62.217	-61.772	-62.022	-62.099	-61.391	-62.418	-63.087	-62.7	-62.452	-62.688
-1.5427	-57.446	-62.374	-62.459	-62.063	-62.347	-62.419	-61.225	-62.457	-62.995	-62.572	-62.485	-62.696
-1.5407	-57.397	-62.554	-62.553	-62.175	-62.537	-62.605	-60.931	-62.461	-62.929	-62.505	-62.467	-62.674
-1.5387	-57.008	-62.563	-62.49	-62.103	-62.559	-62.625	-60.633	-62.436	-62.858	-62.426	-62.426	-62.625
-1.5367	-56.258	-62.423	-62.301	-61.881	-62.445	-62.503	-60.484	-62.514	-62.822	-62.384	-62.504	-62.655
-1.5347	-55.381	-62.169	-62.029	-61.56	-62.216	-62.268	-60.6	-62.728	-62.888	-62.458	-62.71	-62.82
-1.5327	-54.622	-61.883	-61.77	-61.252	-61.944	-61.994	-60.674	-62.902	-62.962	-62.529	-62.904	-62.986
-1.5307	-53.817	-61.591	-61.509	-60.94	-61.668	-61.713	-60.761	-62.997	-63.027	-62.592	-63.043	-63.102
-1.5287	-53.217	-61.372	-61.336	-60.736	-61.456	-61.496	-60.882	-63.034	-63.075	-62.627	-63.143	-63.18
-1.5267	-52.625	-61.206	-61.195	-60.569	-61.296	-61.33	-60.93	-63.028	-63.095	-62.653	-63.2	-63.216
-1.5247	-52.379	-61.1	-61.117	-60.483	-61.186	-61.214	-60.797	-62.943	-63.08	-62.639	-63.166	-63.185
-1.5227	-52.108	-61.035	-61.06	-60.423	-61.116	-61.135	-60.427	-62.727	-62.971	-62.523	-62.959	-63.014
-1.5207	-51.923	-60.979	-60.996	-60.354	-61.054	-61.066	-60.142	-62.457	-62.867	-62.45	-62.644	-62.762
-1.5187	-51.768	-60.933	-60.946	-60.3	-60.997	-61.005	-59.969	-62.211	-62.806	-62.42	-62.341	-62.522
-1.5167	-51.516	-60.851	-60.844	-60.182	-60.908	-60.913	-59.958	-62.013	-62.756	-62.388	-62.076	-62.319
-1.5147	-51.455	-60.769	-60.763	-60.087	-60.819	-60.824	-60.163	-61.872	-62.776	-62.412	-61.866	-62.167
-1.5127	-51.464	-60.717	-60.73	-60.04	-60.76	-60.772	-60.546	-61.796	-62.846	-62.497	-61.724	-62.081
-1.5107	-51.838	-60.75	-60.795	-60.103	-60.785	-60.809	-61.023	-61.78	-62.961	-62.628	-61.657	-62.058
-1.5087	-52.156	-60.834	-60.899	-60.218	-60.865	-60.895	-61.417	-61.874	-63.061	-62.715	-61.745	-62.135
-1.5067	-52.496	-60.952	-61.02	-60.363	-60.988	-61.016	-61.821	-62.039	-63.161	-62.804	-61.89	-62.267
-1.5047	-52.945	-61.099	-61.178	-60.553	-61.138	-61.16	-62.135	-62.289	-63.298	-62.955	-62.058	-62.445
-1.5027	-53.157	-61.229	-61.308	-60.71	-61.277	-61.292	-62.353	-62.59	-63.445	-63.127	-62.257	-62.672
-1.5007	-53.263	-61.3	-61.348	-60.777	-61.359	-61.366	-62.471	-62.845	-63.565	-63.265	-62.397	-62.853
-1.4987	-53.151	-61.296	-61.314	-60.758	-61.366	-61.362	-62.54	-63.079	-63.647	-63.358	-62.603	-63.041
-1.4967	-53.016	-61.247	-61.241	-60.688	-61.328	-61.321	-62.756	-63.184	-63.734	-63.467	-62.667	-63.142
-1.4947	-52.873	-61.158	-61.14	-60.582	-61.247	-61.241	-62.894	-63.152	-63.777	-63.523	-62.613	-63.133
-1.4927	-52.733	-61.064	-61.032	-60.464	-61.161	-61.161	-62.961	-62.992	-63.734	-63.462	-62.516	-63.046
-1.4907	-52.849	-61.033	-60.985	-60.418	-61.127	-61.136	-62.927	-62.709	-63.586	-63.287	-62.305	-62.84
-1.4887	-52.887	-61.069	-61.017	-60.447	-61.16	-61.172	-62.864	-62.417	-63.416	-63.085	-62.116	-62.632
-1.4867	-52.757	-61.107	-61.03	-60.457	-61.195	-61.211	-62.795	-62.063	-63.243	-62.883	-61.788	-62.346
-1.4847	-52.717	-61.128	-61.044	-60.469	-61.216	-61.232	-62.648	-61.846	-63.088	-62.701	-61.61	-62.149
-1.4827	-52.869	-61.2	-61.128	-60.555	-61.282	-61.298	-62.572	-61.796	-63.007	-62.606	-61.584	-62.103
-1.4807	-53.065	-61.295	-61.235	-60.665	-61.375	-61.387	-62.566	-61.831	-63.004	-62.605	-61.609	-62.122
-1.4787	-53.014	-61.344	-61.293	-60.721	-61.43	-61.438	-62.638	-61.952	-63.085	-62.685	-61.71	-62.224
-1.4767	-53.213	-61.376	-61.349	-60.78	-61.467	-61.479	-62.664	-62.056	-63.145	-62.729	-61.762	-62.297
-1.4747	-53.722	-61.478	-61.486	-60.932	-61.57	-61.585	-62.62	-62.238	-63.194	-62.769	-61.903	-62.428
-1.4727	-54.278	-61.653	-61.671	-61.142	-61.74	-61.758	-62.46	-62.305	-63.21	-62.761	-61.906	-62.474
-1.4707	-54.775	-61.832	-61.834	-61.334	-61.917	-61.938	-62.126	-62.182	-63.09	-62.585	-61.737	-62.344
-1.4687	-55.201	-62	-61.974	-61.507	-62.082	-62.106	-61.603	-61.957	-62.876	-62.305	-61.482	-62.118
-1.4667	-55.805	-62.18	-62.124	-61.691	-62.251	-62.277	-61.003	-61.655	-62.614	-61.983	-61.229	-61.847
-1.4647	-56.238	-62.343	-62.243	-61.843	-62.406	-62.432	-60.469	-61.351	-62.369	-61.69	-61.033	-61.602
-1.4627	-56.283	-62.431	-62.271	-61.888	-62.49	-62.516	-60.055	-61.022	-62.164	-61.441	-60.816	-61.351
-1.4607	-55.968	-62.38	-62.181	-61.791	-62.445	-62.476	-59.799	-60.758	-61.996	-61.238	-60.68	-61.153
-1.4587	-55.466	-62.216	-62.005	-61.593	-62.286	-62.322	-59.656	-60.68	-61.943	-61.192	-60.729	-61.123
-1.4567	-54.951	-62.023	-61.842	-61.396	-62.095	-62.137	-59.585	-60.69	-61.942	-61.208	-60.826	-61.166
-1.4547	-54.193	-61.797	-61.644	-61.155	-61.877	-61.926	-59.46	-60.694	-61.909	-61.179	-60.866	-61.187
-1.4527	-53.207	-61.507	-61.393	-60.842	-61.596	-61.649	-59.336	-60.658	-61.891	-61.177	-60.846	-61.167
-1.4507	-52.371	-61.185	-61.142	-60.535	-61.279	-61.337	-59.284	-60.652	-61.886	-61.191	-60.842	-61.155
-1.4487	-51.99	-60.968	-60.999	-60.353	-61.059	-61.113	-59.26	-60.732	-61.92	-61.259	-60.931	-61.219
-1.4467	-51.788	-60.873	-60.948	-60.277	-60.963	-61.01	-59.3	-60.751	-61.967	-61.328	-60.954	-61.245
-1.4447	-51.607	-60.794	-60.877	-60.185	-60.884	-60.922	-59.639	-60.748	-62.074	-61.461	-60.988	-61.272
-1.4427	-51.592	-60.729	-60.833	-60.129	-60.817	-60.845	-60.224	-60.895	-62.299	-61.738	-61.125	-61.408
-1.4407	-51.795	-60.713	-60.838	-60.135	-60.802	-60.822	-60.854	-61.282	-62.581	-62.072	-61.438	-61.719
-1.4387	-52.445	-60.785	-60.936	-60.252	-60.866	-60.882	-61.381	-61.701	-62.858	-62.399	-61.803	-62.091
-1.4367	-52.994	-60.897	-61.078	-60.417	-60.958	-60.98	-61.901	-62.025	-63.097	-62.679	-62.069	-62.386
-1.4347	-53.54	-61	-61.217	-60.582	-61.037	-61.064	-62.424	-62.375	-63.297	-62.893	-62.334	-62.675
-1.4327	-54.148	-61.141	-61.404	-60.802	-61.152	-61.188	-62.669	-62.706	-63.41	-63.007	-62.557	-62.931
-1.4307	-54.941	-61.332	-61.624	-61.063	-61.315	-61.362	-62.684	-62.867	-63.416	-62.986	-62.663	-63.064
-1.4287	-55.829	-61.577	-61.877	-61.362	-61.526	-61.58	-62.58	-62.779	-63.303	-62.832	-62.541	-62.987
-1.4267	-56.16	-61.785	-62.053	-61.566	-61.712	-61.771	-62.479	-62.564	-63.131	-62.598	-62.251	-62.765
-1.4247	-56.199	-61.89	-62.101	-61.629	-61.825	-61.872	-62.261	-62.273	-62.898	-62.284	-61.865	-62.458
-1.4227	-55.949	-61.917	-62.071	-61.598	-61.866	-61.904	-61.961	-61.931	-62.666	-62.017	-61.482	-62.12
-1.4207	-55.552	-61.853	-61.954	-61.471	-61.82	-61.851	-61.769	-61.73	-62.55	-61.897	-61.297	-61.917
-1.4187	-55.041	-61.739	-61.815	-61.314	-61.725	-61.748	-61.693	-61.734	-62.541	-61.913	-61.295	-61.891
-1.4167	-54.506	-61.602	-61.683	-61.16	-61.607	-61.626	-61.684	-61.857	-62.632	-62.043	-61.436	-61.99
-1.4147	-54.204	-61.48	-61.577	-61.04	-61.503	-61.517	-61.631	-62.035	-62.762	-62.226	-61.65	-62.146
-1.4127	-54.287	-61.451	-61.574	-61.037	-61.477	-61.5	-61.59	-62.298	-62.913	-62.429	-61.966	-62.385
-1.4107	-54.631	-61.484	-61.632	-61.105	-61.516	-61.549	-61.533	-62.525	-63.034	-62.573	-62.239	-62.604
-1.4087	-55.165	-61.598	-61.772	-61.266	-61.633	-61.671	-61.494	-62.584	-63.077	-62.617	-62.32	-62.675
-1.4067	-55.509	-61.729	-61.897	-61.409	-61.767	-61.812	-61.526	-62.496	-63.074	-62.607	-62.266	-62.616
-1.4047	-55.677	-61.822	-61.958	-61.483	-61.868	-61.911	-61.628	-62.417	-63.081	-62.616	-62.231	-62.563
-1.4027	-55.833	-61.912	-62.024	-61.563	-61.966	-62.006	-61.775	-62.394	-63.088	-62.612	-62.281	-62.574
-1.4007	-55.62	-61.935	-62.007	-61.552	-61.999	-62.033	-61.969	-62.371	-63.132	-62.669	-62.328	-62.59
-1.3987	-55.377	-61.92	-61.956	-61.503	-61.984	-62.012	-62.202	-62.435	-63.216	-62.783	-62.429	-62.661
-1.3967	-54.945	-61.854	-61.844	-61.379	-61.922	-61.946	-62.365	-62.573	-63.299	-62.9	-62.588	-62.791
-1.3947	-54.608	-61.757	-61.717	-61.24	-61.832	-61.854	-62.397	-62.728	-63.359	-62.98	-62.746	-62.936
-1.3927	-54.309	-61.625	-61.563	-61.077	-61.708	-61.731	-62.288	-62.808	-63.338	-62.957	-62.795	-62.997
-1.3907	-53.881	-61.434	-61.361	-60.853	-61.524	-61.55	-62.209	-62.899	-63.349	-63.003	-62.847	-63.057
-1.3887	-53.54	-61.216	-61.163	-60.62	-61.313	-61.34	-62.15	-63.014	-63.384	-63.054	-62.932	-63.151
-1.3867	-53.018	-60.988	-60.966	-60.385	-61.094	-61.123	-61.952	-63.009	-63.334	-62.98	-62.931	-63.16
-1.3847	-52.465	-60.758	-60.767	-60.154	-60.87	-60.897	-61.469	-62.834	-63.178	-62.761	-62.761	-63.017
-1.3827	-51.901	-60.524	-60.558	-59.914	-60.64	-60.664	-60.778	-62.507	-62.916	-62.43	-62.465	-62.733
-1.3807	-51.575	-60.379	-60.454	-59.78	-60.49	-60.512	-60.118	-62.152	-62.636	-62.075	-62.186	-62.433
-1.3787	-51.305	-60.321	-60.411	-59.721	-60.425	-60.451	-59.417	-61.722	-62.302	-61.627	-61.825	-62.067
-1.3767	-51.381	-60.341	-60.434	-59.753	-60.433	-60.458	-58.667	-61.257	-61.928	-61.149	-61.412	-61.652
-1.3747	-51.777	-60.452	-60.527	-59.874	-60.529	-60.556	-58.16	-60.94	-61.676	-60.836	-61.103	-61.342
-1.3727	-52.269	-60.605	-60.656	-60.025	-60.671	-60.701	-58.223	-60.886	-61.626	-60.778	-61.05	-61.263
-1.3707	-52.837	-60.782	-60.815	-60.211	-60.839	-60.872	-58.728	-61.105	-61.773	-60.945	-61.233	-61.43
-1.3687	-53.302	-60.928	-60.938	-60.358	-60.979	-61.013	-59.413	-61.425	-62.046	-61.285	-61.477	-61.699
-1.3667	-54.094	-61.088	-61.104	-60.552	-61.134	-61.165	-60.151	-61.783	-62.385	-61.719	-61.753	-62.001
-1.3647	-54.493	-61.277	-61.271	-60.741	-61.326	-61.356	-60.909	-62.144	-62.746	-62.187	-62.045	-62.318
-1.3627	-54.476	-61.382	-61.343	-60.81	-61.441	-61.472	-61.588	-62.381	-63.049	-62.582	-62.26	-62.555
-1.3607	-54.415	-61.448	-61.398	-60.867	-61.51	-61.539	-61.999	-62.503	-63.25	-62.857	-62.364	-62.681
-1.3587	-54.303	-61.529	-61.474	-60.943	-61.589	-61.618	-62.234	-62.541	-63.374	-63.029	-62.435	-62.745
-1.3567	-53.978	-61.595	-61.518	-60.983	-61.654	-61.686	-62.222	-62.516	-63.396	-63.06	-62.454	-62.745
-1.3547	-53.286	-61.561	-61.452	-60.897	-61.623	-61.663	-62.021	-62.43	-63.324	-62.972	-62.389	-62.685
-1.3527	-52.919	-61.448	-61.359	-60.78	-61.508	-61.552	-61.808	-62.257	-63.171	-62.764	-62.224	-62.538
-1.3507	-53.146	-61.408	-61.382	-60.803	-61.457	-61.503	-61.539	-62.086	-62.991	-62.535	-61.986	-62.35
-1.3487	-53.347	-61.429	-61.435	-60.855	-61.474	-61.528	-61.247	-61.86	-62.81	-62.306	-61.676	-62.121
-1.3467	-53.725	-61.44	-61.461	-60.887	-61.491	-61.545	-60.93	-61.548	-62.607	-62.079	-61.254	-61.805
-1.3447	-54.407	-61.518	-61.567	-61.01	-61.575	-61.624	-60.762	-61.283	-62.437	-61.895	-60.913	-61.533
-1.3427	-55.02	-61.664	-61.713	-61.177	-61.719	-61.765	-60.863	-61.123	-62.346	-61.8	-60.738	-61.376
-1.3407	-55.341	-61.805	-61.825	-61.306	-61.856	-61.905	-61.012	-61.072	-62.382	-61.878	-60.711	-61.342
-1.3387	-55.069	-61.844	-61.807	-61.286	-61.896	-61.947	-61.05	-61.12	-62.46	-61.996	-60.874	-61.434
-1.3367	-55.023	-61.8	-61.746	-61.219	-61.847	-61.894	-60.983	-61.232	-62.508	-62.062	-61.144	-61.589
-1.3347	-54.912	-61.759	-61.719	-61.186	-61.794	-61.839	-60.916	-61.416	-62.562	-62.114	-61.481	-61.799
-1.3327	-54.635	-61.655	-61.622	-61.072	-61.677	-61.725	-60.921	-61.612	-62.659	-62.217	-61.8	-62.02
-1.3307	-54.643	-61.54	-61.548	-60.987	-61.546	-61.597	-60.899	-61.768	-62.793	-62.374	-62.039	-62.2
-1.3287	-54.783	-61.461	-61.503	-60.931	-61.458	-61.508	-60.881	-61.929	-62.876	-62.456	-62.214	-62.346
-1.3267	-55.341	-61.453	-61.537	-60.97	-61.439	-61.49	-61.134	-62.085	-62.973	-62.56	-62.302	-62.456
-1.3247	-55.683	-61.51	-61.6	-61.037	-61.492	-61.549	-61.615	-62.282	-63.17	-62.801	-62.406	-62.601
-1.3227	-55.767	-61.537	-61.598	-61.032	-61.522	-61.593	-62.074	-62.499	-63.388	-63.083	-62.532	-62.774
-1.3207	-55.732	-61.552	-61.589	-61.02	-61.546	-61.624	-62.393	-62.692	-63.544	-63.288	-62.63	-62.918
-1.3187	-55.391	-61.522	-61.523	-60.941	-61.538	-61.619	-62.587	-62.915	-63.63	-63.408	-62.755	-63.06
-1.3167	-54.883	-61.427	-61.418	-60.821	-61.472	-61.551	-62.734	-63.17	-63.715	-63.53	-62.965	-63.248
-1.3147	-54.092	-61.277	-61.256	-60.632	-61.352	-61.426	-62.834	-63.443	-63.816	-63.666	-63.26	-63.485
-1.3127	-53.415	-61.09	-61.088	-60.442	-61.187	-61.254	-62.886	-63.682	-63.896	-63.765	-63.533	-63.71
-1.3107	-53.019	-60.96	-60.989	-60.335	-61.069	-61.124	-62.956	-63.826	-63.959	-63.828	-63.668	-63.837
-1.3087	-52.878	-60.894	-60.95	-60.298	-61.01	-61.057	-63.015	-63.909	-64.012	-63.885	-63.749	-63.914
-1.3067	-53.154	-60.938	-61.016	-60.383	-61.05	-61.09	-63.056	-63.868	-64.022	-63.883	-63.716	-63.905
-1.3047	-53.785	-61.117	-61.187	-60.587	-61.213	-61.25	-63.063	-63.68	-63.971	-63.797	-63.485	-63.747
-1.3027	-54.741	-61.406	-61.458	-60.912	-61.485	-61.518	-62.754	-63.314	-63.782	-63.54	-63.031	-63.402
-1.3007	-55.654	-61.769	-61.777	-61.287	-61.836	-61.866	-62.22	-62.83	-63.456	-63.125	-62.461	-62.924
-1.2987	-56.356	-62.112	-62.064	-61.616	-62.173	-62.201	-61.658	-62.362	-63.109	-62.691	-61.998	-62.483
-1.2967	-56.828	-62.391	-62.286	-61.867	-62.448	-62.473	-61.146	-61.918	-62.782	-62.278	-61.534	-62.057
-1.2947	-56.813	-62.535	-62.376	-61.973	-62.59	-62.615	-60.723	-61.598	-62.545	-61.989	-61.16	-61.722
-1.2927	-56.313	-62.51	-62.327	-61.918	-62.566	-62.59	-60.416	-61.436	-62.409	-61.828	-61.009	-61.559
-1.2907	-55.431	-62.331	-62.136	-61.7	-62.389	-62.413	-60.481	-61.483	-62.431	-61.865	-61.111	-61.614
-1.2887	-54.465	-62.025	-61.839	-61.364	-62.084	-62.109	-60.716	-61.705	-62.586	-62.06	-61.367	-61.832
-1.2867	-53.471	-61.644	-61.487	-60.968	-61.703	-61.728	-60.953	-62.006	-62.76	-62.269	-61.663	-62.103
-1.2847	-52.388	-61.212	-61.096	-60.522	-61.271	-61.296	-61.13	-62.297	-62.914	-62.454	-62.001	-62.389
-1.2827	-51.628	-60.803	-60.746	-60.115	-60.869	-60.892	-61.193	-62.459	-62.978	-62.523	-62.257	-62.575
-1.2807	-51.238	-60.508	-60.502	-59.823	-60.581	-60.605	-61.108	-62.47	-62.956	-62.501	-62.299	-62.6
-1.2787	-50.981	-60.311	-60.341	-59.623	-60.391	-60.417	-60.832	-62.32	-62.843	-62.376	-62.135	-62.449
-1.2767	-50.725	-60.183	-60.236	-59.483	-60.272	-60.298	-60.606	-62.035	-62.691	-62.208	-61.836	-62.178
-1.2747	-50.48	-60.113	-60.182	-59.402	-60.213	-60.242	-60.495	-61.715	-62.578	-62.101	-61.479	-61.875
-1.2727	-50.388	-60.094	-60.175	-59.378	-60.208	-60.238	-60.488	-61.461	-62.517	-62.057	-61.14	-61.613
-1.2707	-50.372	-60.127	-60.225	-59.426	-60.249	-60.277	-60.613	-61.341	-62.537	-62.115	-60.932	-61.479
-1.2687	-50.556	-60.187	-60.318	-59.531	-60.314	-60.334	-60.88	-61.308	-62.623	-62.241	-60.915	-61.467
-1.2667	-50.695	-60.29	-60.445	-59.674	-60.422	-60.434	-61.292	-61.347	-62.774	-62.435	-61.029	-61.565
-1.2647	-50.747	-60.393	-60.553	-59.797	-60.532	-60.535	-61.647	-61.457	-62.941	-62.643	-61.217	-61.729
-1.2627	-50.964	-60.485	-60.642	-59.904	-60.622	-60.616	-61.862	-61.51	-63.045	-62.771	-61.338	-61.842
-1.2607	-51.467	-60.635	-60.793	-60.078	-60.76	-60.75	-62.055	-61.529	-63.114	-62.855	-61.428	-61.911
-1.2587	-51.762	-60.79	-60.911	-60.213	-60.91	-60.9	-62.199	-61.547	-63.164	-62.901	-61.501	-61.963
-1.2567	-51.749	-60.883	-60.925	-60.235	-60.997	-60.998	-62.138	-61.597	-63.146	-62.848	-61.521	-61.999
-1.2547	-51.909	-60.911	-60.895	-60.213	-61.018	-61.029	-61.85	-61.629	-63.035	-62.682	-61.478	-61.98
-1.2527	-52.318	-60.942	-60.892	-60.223	-61.04	-61.06	-61.549	-61.623	-62.889	-62.477	-61.427	-61.93
-1.2507	-52.687	-61.001	-60.918	-60.272	-61.094	-61.122	-61.339	-61.713	-62.801	-62.337	-61.511	-61.969
-1.2487	-52.614	-61.001	-60.876	-60.243	-61.094	-61.123	-61.099	-61.85	-62.738	-62.227	-61.682	-62.079
-1.2467	-52.446	-60.952	-60.809	-60.185	-61.043	-61.071	-60.853	-61.928	-62.68	-62.143	-61.811	-62.155
-1.2447	-51.927	-60.85	-60.716	-60.077	-60.938	-60.963	-60.872	-61.988	-62.713	-62.203	-61.938	-62.228
-1.2427	-51.345	-60.691	-60.586	-59.923	-60.775	-60.799	-61.103	-62.11	-62.866	-62.408	-62.133	-62.374
-1.2407	-50.783	-60.526	-60.466	-59.776	-60.605	-60.628	-61.37	-62.27	-63.046	-62.636	-62.326	-62.54
-1.2387	-50.295	-60.361	-60.36	-59.634	-60.434	-60.46	-61.603	-62.381	-63.192	-62.829	-62.45	-62.656
-1.2367	-50.218	-60.274	-60.335	-59.59	-60.333	-60.372	-61.8	-62.408	-63.294	-62.971	-62.425	-62.671
-1.2347	-50.47	-60.278	-60.384	-59.635	-60.32	-60.373	-61.98	-62.433	-63.354	-63.059	-62.354	-62.65
-1.2327	-51.428	-60.431	-60.575	-59.859	-60.461	-60.521	-62.066	-62.438	-63.374	-63.078	-62.267	-62.612
-1.2307	-52.64	-60.759	-60.912	-60.249	-60.778	-60.839	-62.16	-62.457	-63.356	-63.06	-62.163	-62.558
-1.2287	-53.87	-61.163	-61.283	-60.684	-61.17	-61.232	-62.345	-62.556	-63.408	-63.135	-62.155	-62.594
-1.2267	-55.034	-61.58	-61.641	-61.106	-61.584	-61.642	-62.569	-62.678	-63.497	-63.252	-62.207	-62.679
-1.2247	-55.85	-61.91	-61.903	-61.413	-61.927	-61.972	-62.865	-62.896	-63.639	-63.429	-62.431	-62.875
-1.2227	-56.272	-62.113	-62.045	-61.578	-62.146	-62.179	-63.182	-63.147	-63.824	-63.652	-62.743	-63.139
-1.2207	-56.059	-62.132	-62.006	-61.529	-62.185	-62.212	-63.469	-63.356	-63.991	-63.853	-63.033	-63.382
-1.2187	-55.453	-61.95	-61.77	-61.269	-62.029	-62.056	-63.637	-63.475	-64.106	-63.987	-63.267	-63.562
-1.2167	-54.728	-61.642	-61.441	-60.913	-61.744	-61.769	-63.671	-63.488	-64.119	-63.982	-63.384	-63.635
-1.2147	-54.108	-61.316	-61.127	-60.579	-61.436	-61.461	-63.635	-63.473	-64.063	-63.889	-63.413	-63.647
-1.2127	-53.693	-61.059	-60.88	-60.333	-61.183	-61.21	-63.606	-63.394	-63.981	-63.765	-63.337	-63.584
-1.2107	-53.34	-60.878	-60.694	-60.155	-61	-61.033	-63.589	-63.292	-63.883	-63.614	-63.202	-63.479
-1.2087	-53.123	-60.768	-60.577	-60.055	-60.879	-60.918	-63.468	-63.203	-63.756	-63.434	-63.02	-63.352
-1.2067	-52.653	-60.683	-60.497	-59.962	-60.781	-60.822	-63.265	-63.089	-63.611	-63.24	-62.772	-63.185
-1.2047	-51.88	-60.572	-60.395	-59.818	-60.664	-60.712	-62.98	-62.946	-63.461	-63.066	-62.537	-62.998
-1.2027	-50.844	-60.374	-60.214	-59.571	-60.462	-60.519	-62.702	-62.845	-63.375	-62.985	-62.411	-62.874
-1.2007	-49.658	-60.102	-59.994	-59.261	-60.188	-60.254	-62.365	-62.761	-63.293	-62.905	-62.311	-62.78
-1.1987	-48.447	-59.776	-59.738	-58.909	-59.872	-59.939	-61.94	-62.666	-63.196	-62.824	-62.191	-62.675
-1.1967	-47.612	-59.454	-59.511	-58.597	-59.563	-59.628	-61.567	-62.587	-63.111	-62.743	-62.14	-62.597
-1.1947	-47.362	-59.274	-59.429	-58.47	-59.391	-59.456	-61.296	-62.54	-63.045	-62.669	-62.165	-62.575
-1.1927	-47.588	-59.244	-59.464	-58.494	-59.365	-59.427	-61.083	-62.483	-62.985	-62.575	-62.165	-62.552
-1.1907	-48.041	-59.343	-59.583	-58.62	-59.461	-59.522	-60.797	-62.323	-62.838	-62.361	-62.002	-62.419
-1.1887	-48.514	-59.479	-59.696	-58.75	-59.595	-59.658	-60.466	-62.045	-62.625	-62.068	-61.634	-62.14
-1.1867	-49.309	-59.659	-59.856	-58.942	-59.758	-59.829	-60.12	-61.731	-62.364	-61.713	-61.25	-61.815
-1.1847	-49.784	-59.849	-60.004	-59.111	-59.925	-60.014	-59.925	-61.389	-62.158	-61.445	-60.813	-61.473
[truncated: 718 more rows]

## Sheet: Fig7F
-5.1827	10.763	25.822	91.208	98.005	70.367
-5.1822	25.528	25.528	29.134	71.52	71.52
-5.1817	25.528	25.528	29.134	71.52	71.52
-5.1812	25.528	25.528	29.134	71.52	71.52
-5.1807	25.528	25.528	29.134	71.52	71.52
-5.1802	25.527	25.527	29.133	71.521	71.522
-5.1797	25.527	25.527	29.133	71.521	71.522
-5.1792	25.527	25.527	29.133	71.521	71.522
-5.1787	25.527	25.527	29.133	71.521	71.522
-5.1782	25.525	25.525	29.123	71.514	71.524
-5.1777	25.525	25.525	29.123	71.514	71.524
-5.1772	25.525	25.525	29.123	71.514	71.524
-5.1767	25.525	25.525	29.123	71.514	71.524
-5.1762	25.524	25.522	29.124	71.515	71.532
-5.1757	25.524	25.522	29.124	71.515	71.532
-5.1752	25.524	25.522	29.124	71.515	71.532
-5.1747	25.524	25.522	29.124	71.515	71.532
-5.1742	25.52	25.52	29.131	71.521	71.539
-5.1737	25.52	25.52	29.131	71.521	71.539
-5.1732	25.52	25.52	29.131	71.521	71.539
-5.1727	25.52	25.52	29.131	71.521	71.539
-5.1722	25.517	25.518	29.143	71.53	71.546
-5.1717	25.517	25.518	29.143	71.53	71.546
-5.1712	25.517	25.518	29.143	71.53	71.546
-5.1707	25.517	25.518	29.143	71.53	71.546
-5.1702	25.515	25.516	29.152	71.535	71.55
-5.1697	25.515	25.516	29.152	71.535	71.55
-5.1692	25.515	25.516	29.152	71.535	71.55
-5.1687	25.515	25.516	29.152	71.535	71.55
-5.1682	25.512	25.512	29.162	71.538	71.554
-5.1677	25.512	25.512	29.162	71.538	71.554
-5.1672	25.512	25.512	29.162	71.538	71.554
-5.1667	25.512	25.512	29.162	71.538	71.554
-5.1662	25.51	25.51	29.168	71.536	71.561
-5.1657	25.51	25.51	29.168	71.536	71.561
-5.1652	25.51	25.51	29.168	71.536	71.561
-5.1647	25.51	25.51	29.168	71.536	71.561
-5.1642	25.508	25.508	29.174	71.532	71.566
-5.1637	25.508	25.508	29.174	71.532	71.566
-5.1632	25.508	25.508	29.174	71.532	71.566
-5.1627	25.508	25.508	29.174	71.532	71.566
-5.1622	25.506	25.506	29.178	71.525	71.571
-5.1617	25.506	25.506	29.178	71.525	71.571
-5.1612	25.506	25.506	29.178	71.525	71.571
-5.1607	25.506	25.506	29.178	71.525	71.571
-5.1602	25.506	25.505	29.185	71.519	71.572
-5.1597	25.506	25.505	29.185	71.519	71.572
-5.1592	25.506	25.505	29.185	71.519	71.572
-5.1587	25.506	25.505	29.185	71.519	71.572
-5.1582	25.505	25.503	29.191	71.514	71.572
-5.1577	25.505	25.503	29.191	71.514	71.572
-5.1572	25.505	25.503	29.191	71.514	71.572
-5.1567	25.505	25.503	29.191	71.514	71.572
-5.1562	25.505	25.503	29.199	71.508	71.572
-5.1557	25.505	25.503	29.199	71.508	71.572
-5.1552	25.505	25.503	29.199	71.508	71.572
-5.1547	25.505	25.503	29.199	71.508	71.572
-5.1542	25.504	25.501	29.205	71.503	71.571
-5.1537	25.504	25.501	29.205	71.503	71.571
-5.1532	25.504	25.501	29.205	71.503	71.571
-5.1527	25.504	25.501	29.205	71.503	71.571
-5.1522	25.504	25.499	29.208	71.494	71.577
-5.1517	25.504	25.499	29.208	71.494	71.577
-5.1512	25.504	25.499	29.208	71.494	71.577
-5.1507	25.504	25.499	29.208	71.494	71.577
-5.1502	25.503	25.497	29.212	71.486	71.58
-5.1497	25.503	25.497	29.212	71.486	71.58
-5.1492	25.503	25.497	29.212	71.486	71.58
-5.1487	25.503	25.497	29.212	71.486	71.58
-5.1482	25.503	25.495	29.218	71.48	71.583
-5.1477	25.503	25.495	29.218	71.48	71.583
-5.1472	25.503	25.495	29.218	71.48	71.583
-5.1467	25.503	25.495	29.218	71.48	71.583
-5.1462	25.502	25.494	29.227	71.478	71.585
-5.1457	25.502	25.494	29.227	71.478	71.585
-5.1452	25.502	25.494	29.227	71.478	71.585
-5.1447	25.502	25.494	29.227	71.478	71.585
-5.1442	25.501	25.493	29.235	71.475	71.586
-5.1437	25.501	25.493	29.235	71.475	71.586
-5.1432	25.501	25.493	29.235	71.475	71.586
-5.1427	25.501	25.493	29.235	71.475	71.586
-5.1422	25.499	25.493	29.239	71.467	71.587
-5.1417	25.499	25.493	29.239	71.467	71.587
-5.1412	25.499	25.493	29.239	71.467	71.587
-5.1407	25.499	25.493	29.239	71.467	71.587
-5.1402	25.498	25.492	29.246	71.463	71.583
-5.1397	25.498	25.492	29.246	71.463	71.583
-5.1392	25.498	25.492	29.246	71.463	71.583
-5.1387	25.498	25.492	29.246	71.463	71.583
-5.1382	25.496	25.491	29.256	71.46	71.576
-5.1377	25.496	25.491	29.256	71.46	71.576
-5.1372	25.496	25.491	29.256	71.46	71.576
-5.1367	25.496	25.491	29.256	71.46	71.576
-5.1362	25.495	25.491	29.267	71.459	71.573
-5.1357	25.495	25.491	29.267	71.459	71.573
-5.1352	25.495	25.491	29.267	71.459	71.573
-5.1347	25.495	25.491	29.267	71.459	71.573
-5.1342	25.493	25.491	29.279	71.459	71.569
-5.1337	25.493	25.491	29.279	71.459	71.569
-5.1332	25.493	25.491	29.279	71.459	71.569
-5.1327	25.493	25.491	29.279	71.459	71.569
-5.1322	25.492	25.49	29.291	71.46	71.566
-5.1317	25.492	25.49	29.291	71.46	71.566
-5.1312	25.492	25.49	29.291	71.46	71.566
-5.1307	25.492	25.49	29.291	71.46	71.566
-5.1302	25.489	25.49	29.298	71.454	71.564
-5.1297	25.489	25.49	29.298	71.454	71.564
-5.1292	25.489	25.49	29.298	71.454	71.564
-5.1287	25.489	25.49	29.298	71.454	71.564
-5.1282	25.487	25.489	29.304	71.446	71.561
-5.1277	25.487	25.489	29.304	71.446	71.561
-5.1272	25.487	25.489	29.304	71.446	71.561
-5.1267	25.487	25.489	29.304	71.446	71.561
-5.1262	25.485	25.488	29.31	71.437	71.56
-5.1257	25.485	25.488	29.31	71.437	71.56
-5.1252	25.485	25.488	29.31	71.437	71.56
-5.1247	25.485	25.488	29.31	71.437	71.56
-5.1242	25.483	25.486	29.302	71.411	71.56
-5.1237	25.483	25.486	29.302	71.411	71.56
-5.1232	25.483	25.486	29.302	71.411	71.56
-5.1227	25.483	25.486	29.302	71.411	71.56
-5.1222	25.483	25.486	29.301	71.393	71.56
-5.1217	25.483	25.486	29.301	71.393	71.56
-5.1212	25.483	25.486	29.301	71.393	71.56
-5.1207	25.483	25.486	29.301	71.393	71.56
-5.1202	25.482	25.485	29.304	71.377	71.559
-5.1197	25.482	25.485	29.304	71.377	71.559
-5.1192	25.482	25.485	29.304	71.377	71.559
-5.1187	25.482	25.485	29.304	71.377	71.559
-5.1182	25.481	25.485	29.306	71.362	71.551
-5.1177	25.481	25.485	29.306	71.362	71.551
-5.1172	25.481	25.485	29.306	71.362	71.551
-5.1167	25.481	25.485	29.306	71.362	71.551
-5.1162	25.481	25.483	29.308	71.347	71.54
-5.1157	25.481	25.483	29.308	71.347	71.54
-5.1152	25.481	25.483	29.308	71.347	71.54
-5.1147	25.481	25.483	29.308	71.347	71.54
-5.1142	25.481	25.481	29.31	71.333	71.536
-5.1137	25.481	25.481	29.31	71.333	71.536
-5.1132	25.481	25.481	29.31	71.333	71.536
-5.1127	25.481	25.481	29.31	71.333	71.536
-5.1122	25.48	25.478	29.314	71.322	71.53
-5.1117	25.48	25.478	29.314	71.322	71.53
-5.1112	25.48	25.478	29.314	71.322	71.53
-5.1107	25.48	25.478	29.314	71.322	71.53
-5.1102	25.48	25.476	29.318	71.312	71.527
-5.1097	25.48	25.476	29.318	71.312	71.527
-5.1092	25.48	25.476	29.318	71.312	71.527
-5.1087	25.48	25.476	29.318	71.312	71.527
-5.1082	25.479	25.474	29.317	71.296	71.516
-5.1077	25.479	25.474	29.317	71.296	71.516
-5.1072	25.479	25.474	29.317	71.296	71.516
-5.1067	25.479	25.474	29.317	71.296	71.516
-5.1062	25.479	25.472	29.321	71.285	71.508
-5.1057	25.479	25.472	29.321	71.285	71.508
-5.1052	25.479	25.472	29.321	71.285	71.508
-5.1047	25.479	25.472	29.321	71.285	71.508
-5.1042	25.479	25.472	29.323	71.274	71.499
-5.1037	25.479	25.472	29.323	71.274	71.499
-5.1032	25.479	25.472	29.323	71.274	71.499
-5.1027	25.479	25.472	29.323	71.274	71.499
-5.1022	25.48	25.471	29.324	71.261	71.489
-5.1017	25.48	25.471	29.324	71.261	71.489
-5.1012	25.48	25.471	29.324	71.261	71.489
-5.1007	25.48	25.471	29.324	71.261	71.489
-5.1002	25.481	25.471	29.324	71.248	71.48
-5.0997	25.481	25.471	29.324	71.248	71.48
-5.0992	25.481	25.471	29.324	71.248	71.48
-5.0987	25.481	25.471	29.324	71.248	71.48
-5.0982	25.482	25.471	29.325	71.237	71.469
-5.0977	25.482	25.471	29.325	71.237	71.469
-5.0972	25.482	25.471	29.325	71.237	71.469
-5.0967	25.482	25.471	29.325	71.237	71.469
-5.0962	25.482	25.47	29.327	71.228	71.462
-5.0957	25.482	25.47	29.327	71.228	71.462
-5.0952	25.482	25.47	29.327	71.228	71.462
-5.0947	25.482	25.47	29.327	71.228	71.462
-5.0942	25.483	25.47	29.331	71.22	71.457
-5.0937	25.483	25.47	29.331	71.22	71.457
-5.0932	25.483	25.47	29.331	71.22	71.457
-5.0927	25.483	25.47	29.331	71.22	71.457
-5.0922	25.483	25.469	29.333	71.213	71.452
-5.0917	25.483	25.469	29.333	71.213	71.452
-5.0912	25.483	25.469	29.333	71.213	71.452
-5.0907	25.483	25.469	29.333	71.213	71.452
-5.0902	25.484	25.468	29.333	71.204	71.447
-5.0897	25.484	25.468	29.333	71.204	71.447
-5.0892	25.484	25.468	29.333	71.204	71.447
-5.0887	25.484	25.468	29.333	71.204	71.447
-5.0882	25.484	25.468	29.336	71.197	71.441
-5.0877	25.484	25.468	29.336	71.197	71.441
-5.0872	25.484	25.468	29.336	71.197	71.441
-5.0867	25.484	25.468	29.336	71.197	71.441
-5.0862	25.484	25.468	29.338	71.191	71.436
-5.0857	25.484	25.468	29.338	71.191	71.436
-5.0852	25.484	25.468	29.338	71.191	71.436
-5.0847	25.484	25.468	29.338	71.191	71.436
-5.0842	25.485	25.468	29.341	71.186	71.431
-5.0837	25.485	25.468	29.341	71.186	71.431
-5.0832	25.485	25.468	29.341	71.186	71.431
-5.0827	25.485	25.468	29.341	71.186	71.431
-5.0822	25.484	25.467	29.34	71.176	71.427
-5.0817	25.484	25.467	29.34	71.176	71.427
-5.0812	25.484	25.467	29.34	71.176	71.427
-5.0807	25.484	25.467	29.34	71.176	71.427
-5.0802	25.485	25.467	29.342	71.17	71.423
-5.0797	25.485	25.467	29.342	71.17	71.423
-5.0792	25.485	25.467	29.342	71.17	71.423
-5.0787	25.485	25.467	29.342	71.17	71.423
-5.0782	25.485	25.468	29.346	71.165	71.417
-5.0777	25.485	25.468	29.346	71.165	71.417
-5.0772	25.485	25.468	29.346	71.165	71.417
-5.0767	25.485	25.468	29.346	71.165	71.417
-5.0762	25.483	25.468	29.351	71.162	71.411
[truncated: 10,655 more rows]

## Sheet: Fig7G
-5.1827	-1.085	-2.3347	0.0089401	0.42997
[truncated: 543 more rows]

[truncated: 1 more sheets: Fig7I]
