# Supplementary material for: Biophysics of object segmentation in a collision-detecting neuron
Source: eLife. 2018 Apr 18;7:e34238. doi: 10.7554/eLife.34238 (PMC5947989; doi:10.7554/eLife.34238)
Supplement: Supplementary file 1. — A table including additional details on the statistical analyses presented in the Results and Figures. [file elife-34238-supp1.xlsx]

## Sheet: Table_1
Figure panel	Data tested	Test Used	N	N details	Displayed data	P-value	Test statistic with degrees of freedom
1F	stim coherence vs. jump probability	Pearson linear correlation	202	trials from 66 animals	linear fit with mean ± SEM	p = 5.9*10-4	r(7) = 0.91
1G	100% coarse vs. 0% coherence spike count	Wilcoxon rank sum	10	10 animals	points are trial means	p = 2.5*10-4	U(10,10) = 154
1G	100% coarse vs. 0% coherence spike rate	Wilcoxon rank sum	10	10 animals	points are trial means	p = 1.8*10-4	U(10,10) = 155
2D	Sag amplitude for field A (control & ZD), trunk (control), and fields B/C (control)	Kruskal- Wallis anova with Tukey's honest significant differernce procedure	82,13,13,6	recordings from 58, 9, 11, and 6 animals respectively	points and error bars are median and mad	p = 6.51*10-10	Chi2(3,155) = 45.72
2D	control vs. ZD – field A sag amp	ibid.	82, 13	recordings frm 58, 9 animals	points and error bars are median and mad	p = 3.1*10-8
2D	field A vs. trunk – sag amp	ibid.	82, 13	recordings frm 58, 11 animals	points and error bars are median and mad	p = 0.0318
2D	field A vs. fields B/C – sag amp	ibid.	82, 6	recordings frm 58, 6 animals	points and error bars are median and mad	p = 1.37 *10-4
2E	Sag tau for field A (control & ZD), trunk (control), and fields B/C (control)	Kruskal- Wallis anova with Tukey's honest significant differernce procedure	82,13,13,6	recordings from 58, 9, 11, and 6 animals respectively	points and error bars are median and mad	p = 3.02*10-8	Chi2(2,155) = 37.86
2E	control vs. ZD – field A sag tau	ibid.	82, 13	recordings frm 58, 9 animals	points and error bars are median and mad	p = 2.72*10-5
2E	field A vs. trunk – sag tau	ibid.	82, 13	recordings frm 58, 11 animals	points and error bars are median and mad	p = 0.0072
2E	field A vs. fields B/C – sag tau	ibid.	82, 6	recordings frm 58, 6 animals	points and error bars are median and mad	p = 3.91*10-5
2F	bAP amplitude vs. sag amplitude	Pearson linear correlation	100	100 locations recorded from 69 animals	linear fit with data	p = 0.011	r(99) = -0.25
2F	bAP amplitude vs. sag amplitude	slope t-test	100	100 locations recorded from 69 animals	linear fit with data	p = 0.011	t(98) = -2.60
2G	control vs. cAMP – Vhalf of channel activation	unpaired t-test	8,6	recordings from 7,6 animals	mean best fit curves of both, data for control	p = 0.175	t(12) = 0.97
2I	control vs. ZD – resting channel activation	unpaired t-test	82, 13	recordings frm 58, 10 animals	points and error bars are mean and sem	p = 0.0002	t(93) = 3.63
2I	control vs. cAMP – resting channel activation	unpaired t-test	82, 6	recordings frm 58, 6 animals	points and error bars are mean and sem	p = 0.076	t(86) = 1.44
2I	cAMP vs. ZD – resting channel activation	unpaired t-test	6, 13	recordings frm 6, 10 animals	points and error bars are mean and sem	p = 0.0003	t(17) = 4.26
2J	control vs. zd spike counts for standard looms	Wilcoxon rank sum	10	animals	mean traces	p = 0.00041	U(7,7) = 126
2K	control data stim coherence vs. spike count	Pearson linear correlation	10	animals	best fit line for mean control response	p = 8.5*10-10	r(44) = 0.77
2K	control vs. ZD slope of stim coherence vs. spike counts	one-way analysis of covariance test of slope	10	animals		p = 4.6*10-4	F(1,85) = 11.6
2K	control vs. ZD intercept of stim coherence vs. spike counts	one-way analysis of covariance test of intercept	10	animals		p = 0.18	t(85) = 1.35
2L	Individuals change in coherence preference (w/ standard loom)	paired t-test	10	animals	not plotted	p = 1.31*10-4	t(9) =6.36
2L	Individuals change in coherence preference (no standard loom)	paired t-test	10	animals	points and error bars are median and mad	p = 7.90*10-5	t(9) =6.80
2M	control vs. ZD slope of stim coherence vs. norm spike counts	one-way analysis of covariance test of slope	10	animals	points and error bars are mean and sem	p = 3.7*10-4
2N	For each stimulus, ZD change in spike count vs. jump probability	Pearson linear correlation	55,202	trials from 10, 66 animals	line and fitted data	p = 0.00019	r(6) = 0.94
3A	Saline vs. ZD injection for 100% coherent loom	bootstrap unpaired t- test	23, 20	trials from 5 animals	points are mean and error bars are 95% confidence interval	p = 0.008
3A	Saline vs. ZD injection for 86% coherent loom	bootstrap unpaired t- test	25, 21	trials from 5 animals	points are mean and error bars are 95% confidence interval	p = 0.08
3A	100% vs. 86% coherence after ZD injection	bootstrap unpaired t- test	20, 21	trials from 5 animals	points are mean and error bars are 95% confidence interval	p = 0.34
3B	Zd7288 reduction in standard loom response	Wicoxon rank sum	3	animals	line and area are mean ± sd	p = 0.019	U(22,21) = 581
3B	Zd7288 reduction in 86% coherence loom response	Wicoxon rank sum	3	animals	line and area are mean ± sd	p = 0.015	U(6,14) = 93
4A	Control vs. ZD resting potential	Wilcoxon rank sum	82, 15	recordings from 58, 9 animals	boxplots	p = 1.9*10-9	U(82,15) = 4613.5
4B	Control vs. ZD input resistance	Wilcoxon rank sum	78, 17	recordings from 58, 10 animals	boxplots	p = 6.1*10-7	U(78,17) = 3230
4C	Control vs. ZD time caonstant	Wilcoxon rank sum	82, 16	recordings from 58, 10 animals	boxplots	p = 1.3*10-8	U(82,16) = 3467
4D	control vs. ZD amp of 1st sEPSP	Wilcoxon rank sum	82, 55	trials from 14,7 recordings (7, 5 animals)	no	p = 0.0006	U(82,55) = 4876
4D	control vs. ZD sEPSP summation	Wilcoxon rank sum	82, 55	trials from 14,7 recordings (7, 5 animals)	no	p = 0.001	U(82,55) = 636
4E	control - sEPSP summation function of ipi	Exponential fit	82	trials from 14 recordings (7 animals)	fitted line		R2 = 0.865
4E	ZD - sEPSP summation function of ipi	Exponential fit	55	trials from 7 recordings (5 animals)	fited line		R2 = 0.576
4F	Control vs. ZD mean resistance (from integrated curve)	Wilcoxon rank sum	82, 55	trials from 14,7 recordings (7, 5 animals)	no	p = 1.7*10-19	U(82,55) = 3601
4F	Paired rec 1: Control vs. ZD mean resistance	paired t-test	22	trials		p = 0.0013	t(20) = -3.736
4F	Paired rec 2: Control vs. ZD mean resistance	paired t-test	22	trials		p = 0.0002	t(20) = -4.503
4F	Paired rec 3: Control vs. ZD mean resistance	paired t-test	10	trials		p = 0.0008	t(8) = -5.255
4F	Paired rec 4: Control vs. ZD mean resistance	paired t-test	10	trials		p = 0.0135	t(8) = -3.154
4F	Paired rec 5: Control vs. ZD mean resistance	paired t-test	11	trials		p = 3.8*10-6	t(9) = -9.940
4F	Paired rec 6: Control vs. ZD mean resistance	paired t-test	11	trials	fit lines	p = 0.0008	t(9) = -4.951
5B	Individual coherence vs spk ct regressions – control	Pearson linear correlation	5	animals	fit lines	p = 0.01±0.02	r = 0.93±0.04
5B	Individual coherence vs spk ct regressions – ZD	Pearson linear correlation	5	animals	points and error bars are mean and sem	p = 0.26±0.41	r = 0.64±0.48
5C	control data - stim coherence vs. norm spike count	Pearson linear correlation	5	animals	points are mean, error bars are ± 1sem	p = 8.9*10-9	r(29) = 0.83
5C	4AP data – stim coherence vs. norm spike count	Pearson linear correlation	5	animal	points are mean, error bars are ± 1 sem	p = 0.05	r(29) = 0.36
5C	control vs. 4AP slope	ancova	5	animals		p = 0.014	F(1,8) = 9.93
5C	control vs. 4AP test of intercepts	ancova	5	animals		p = 1.2*10-6	t(8) = 13.02
5D	ZD data – stim coherence vs. % change in spikes	slope t-test	10	animals	no	p = 0.003	t(50) = 3.07
5D	4AP data – stim coherence vs. % change in spikes	slope t-test	5	animals	no	p = 0.019	t(28) = 2.48
5D	-2.5 nA – stim coherence vs. % change in spikes	slope t-test	5	animals	no	p = 0.65	t(18) = -0.47
6B/S5A	control vs. 4AP regresion slopes	one-way analysis of covariance	7	animals	no	p = 5.7*10-5	F(1,156) = 17.14
6C/S5B	control vs. 4AP regresion slopes	one-way analysis of covariance	7	animals	no	p = 0.0004	F(1,156) = 13.11
6C/S5C	control vs. 4AP regresion slopes	one-way analysis of covariance	7	animals	no	p = 0.0004	F(1,156) = 13.25
6C/S5D	control vs. 4AP regresion slopes	one-way analysis of covariance	7	animals	no	p = 0.0003	F(1,156) = 13.91
6C/S5E	control vs. 4AP regresion slopes	one-way analysis of covariance	7	animals	no	p = 0.008	F(1,156) = 7.15
6C/S5F	control vs. 4AP regresion slopes	one-way analysis of covariance	7	animals	no	p = 0.60	F(1,156) = 0.27
6E	change in slopes for 6 time periods	signed rank	7	animals		p = 0.031	6 of 6
S1A	control vs. Cs+ sag amplitude	Wicoxon rank sum	8	animals	points and error bars are median and mad	p = 1.2*10-5	U(22,89) = 585
S2B	change in spike count after ZD7288	paired t-test	4	animals	mean	p = 0.0015	t(74) = -3.30
S2C	change in peak depolarization after ZD7288	paired t-test	4	animals	mean	p = 0.52	t(124) = 0.65
S2D	slopes of coherence vs. peak rate for control vs ZD	ancova	10	animals	points are mean, error bars are ± 1sem	p = 5.8*10-5	F(1,105) = 17.59
S2D	intercepts of coherence vs. peak rate for control vs ZD	ancova	10	animals		p = 0.82	t(105) = 0.23
S2E	change in coherence preference (peak rate) after ZD	paired t-test	10	animals	points and error bars are median and mad	p = 2.5*10-4	t(9) = 5.82
S2F	coherence preference change after Cs+	paired t-test	7	animals	points and error bars are median and mad	p = 0.026	t(6) = 2.93
S3B	jump percent control vs. wired	bootstrap unpaired t- test	11, 5	animals	mean and 95% confidence interaval	p = 0.74
S3C	peak firing rate before vs. after pipette insertion	Wilcoxon sign rank	6	animals	difference of means	p = 0.56	W(6) = 7
S3C	spike count before vs. after pipette insertion	Wilcoxon sign rank	6	animals	difference of means	p = 0.44	W(6) = 6
S4B	coherence preference change with -2.5 nA	paired t-test	5	animals	no	p=0.10	t(4)=2.10
